# Supplementary material for: Asymmetric remote C-H borylation of internal alkenes via alkene isomerization
Source: PubMed Central journal article supplement (PMC6158179; doi:10.1038/s41467-018-06240-y), 2018-09-26
Supplement: 41467_2018_6240_MOESM1_ESM.pdf [file 41467_2018_6240_MOESM1_ESM.pdf]

# **Asymmetric Remote C-H Borylation of Internal Alkenes via Alkene Isomerization**

## **Supporting Information**

*Xu Chen, Zhaoyang Cheng, Jun Guo, Zhan Lu\**

*Department of Chemistry, Zhejiang University, Hangzhou 310058, China*

## Supplementary Figures

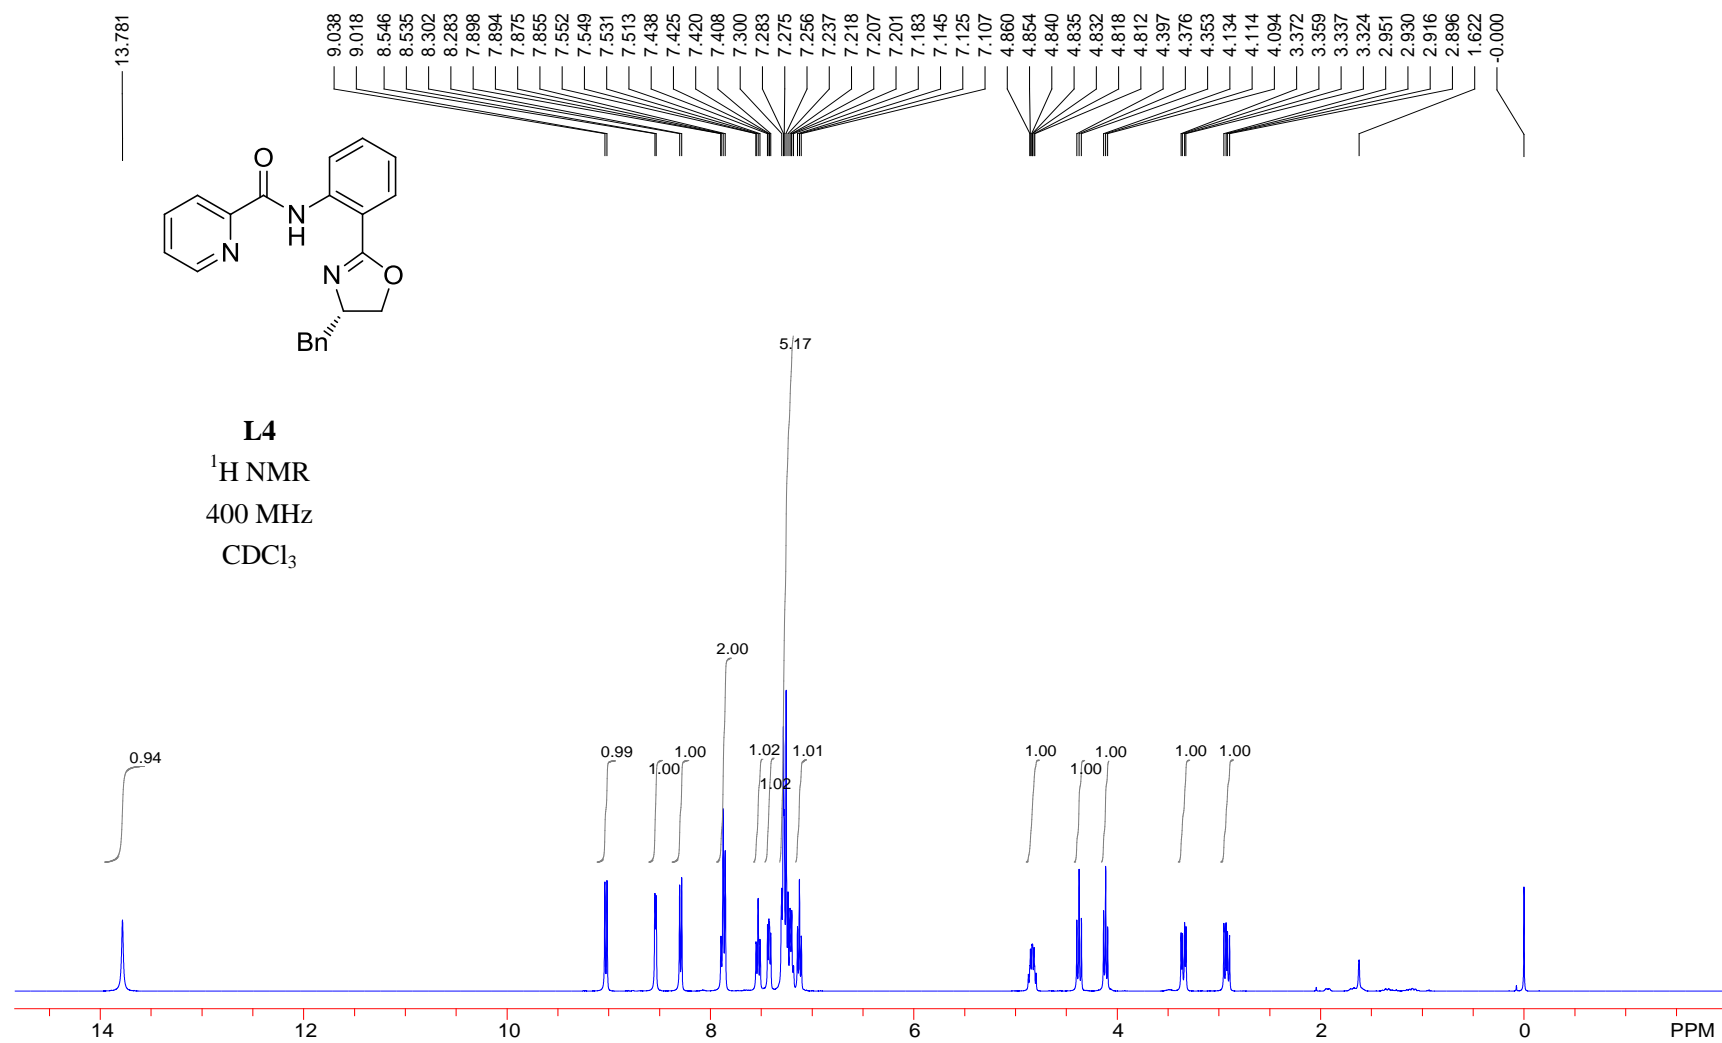

Supplementary Figure 1.  $^1\text{H}$  NMR spectrum for L4

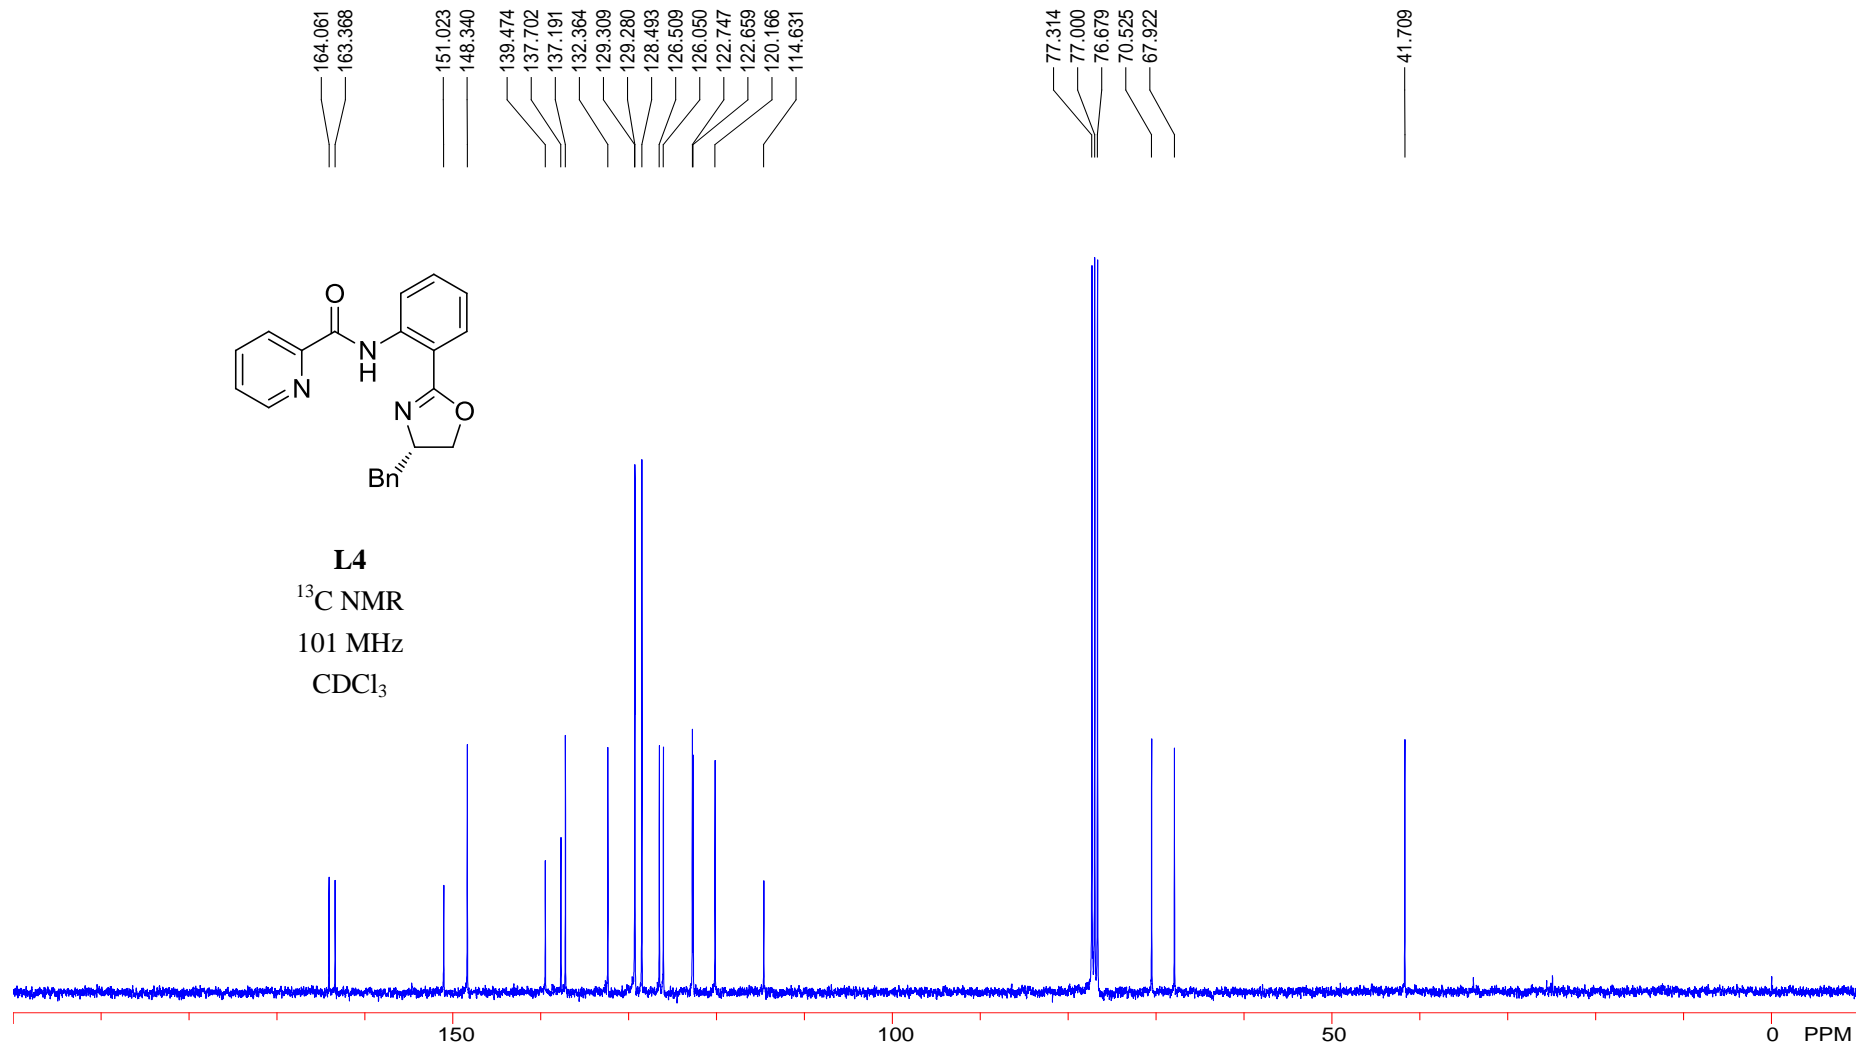

Supplementary Figure 2. <sup>13</sup>C NMR spectrum for L4

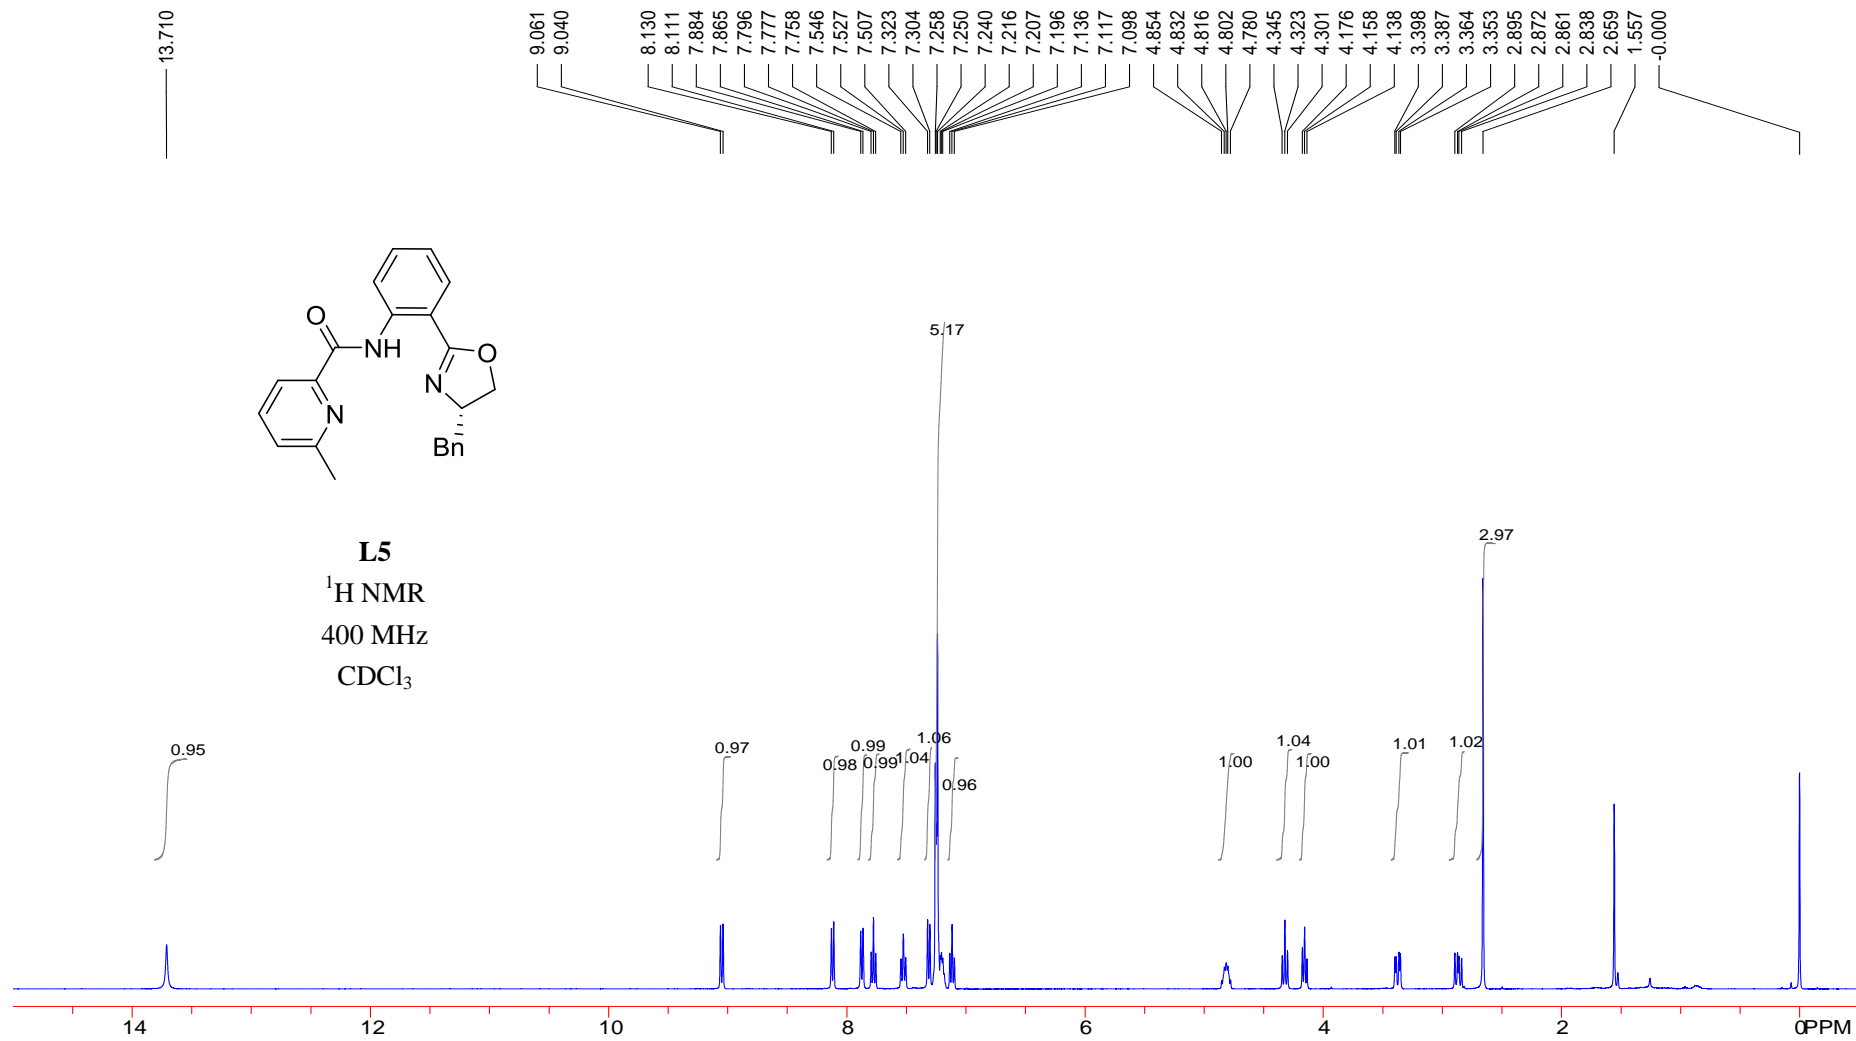

Supplementary Figure 3. <sup>1</sup>H NMR spectrum for **L5**

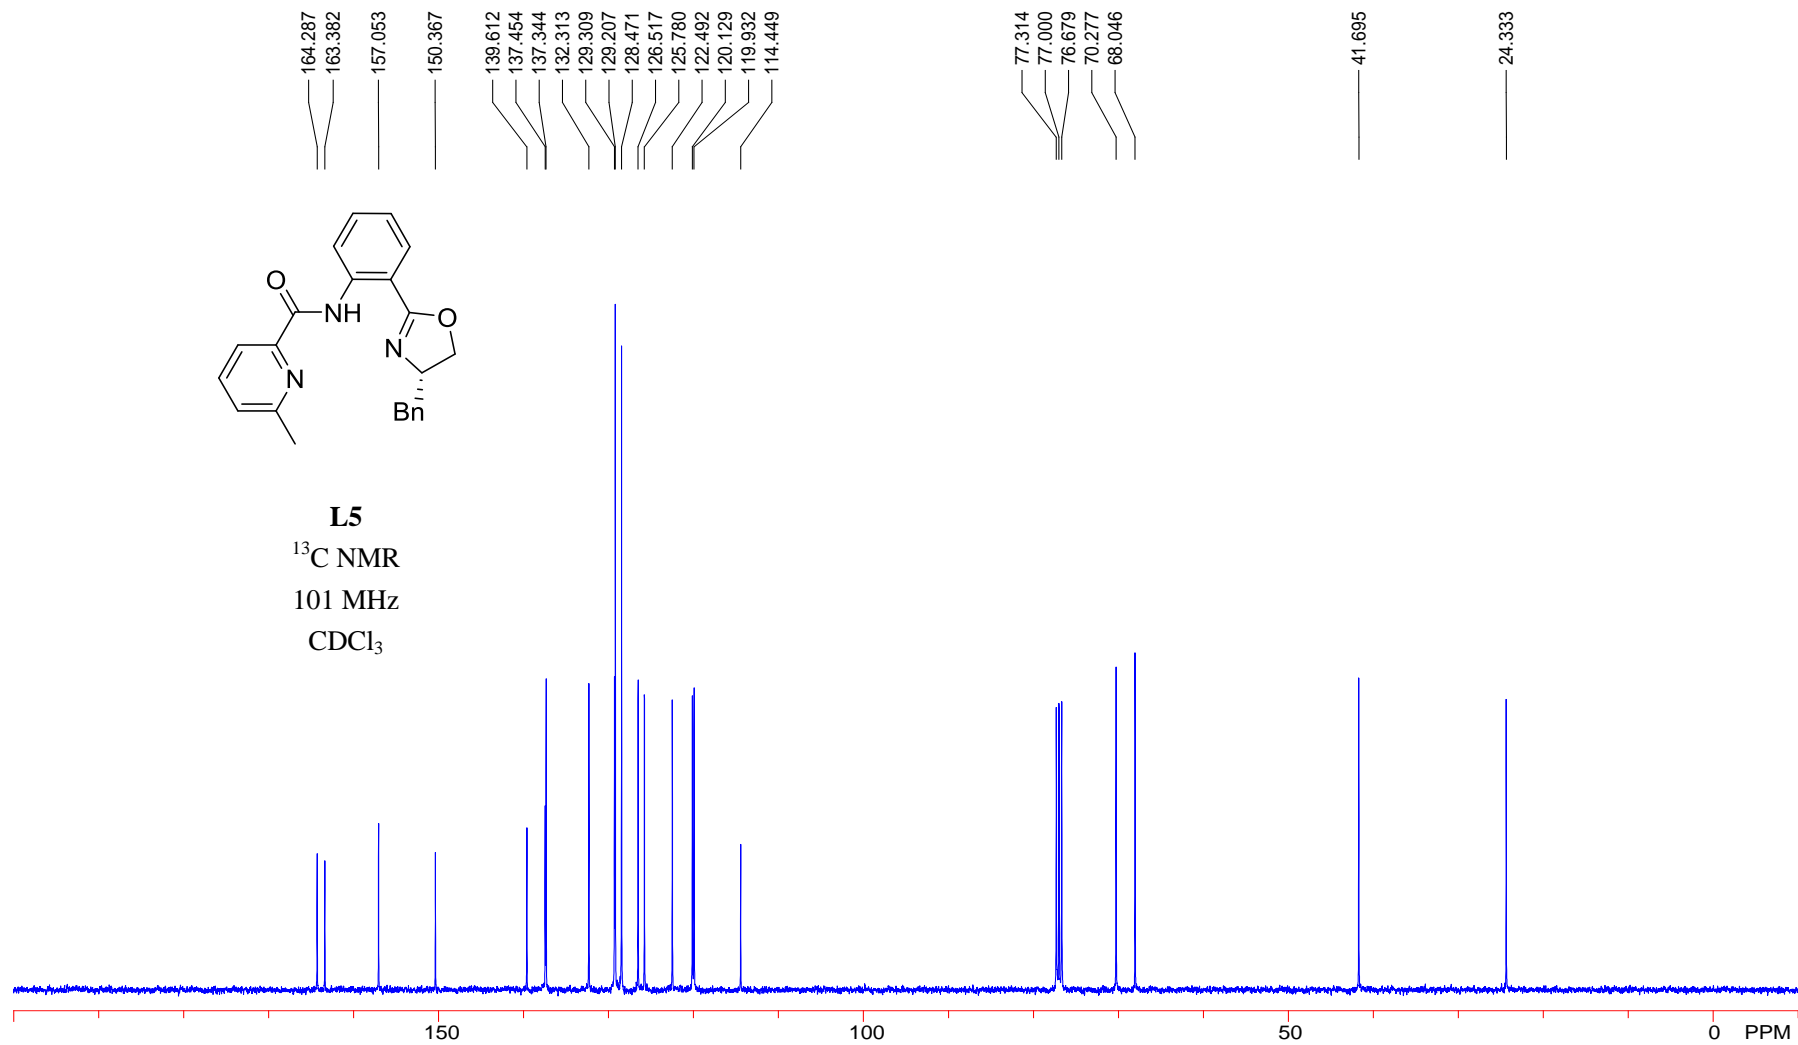

Supplementary Figure 4.  $^{13}\text{C}$  NMR spectrum for L5

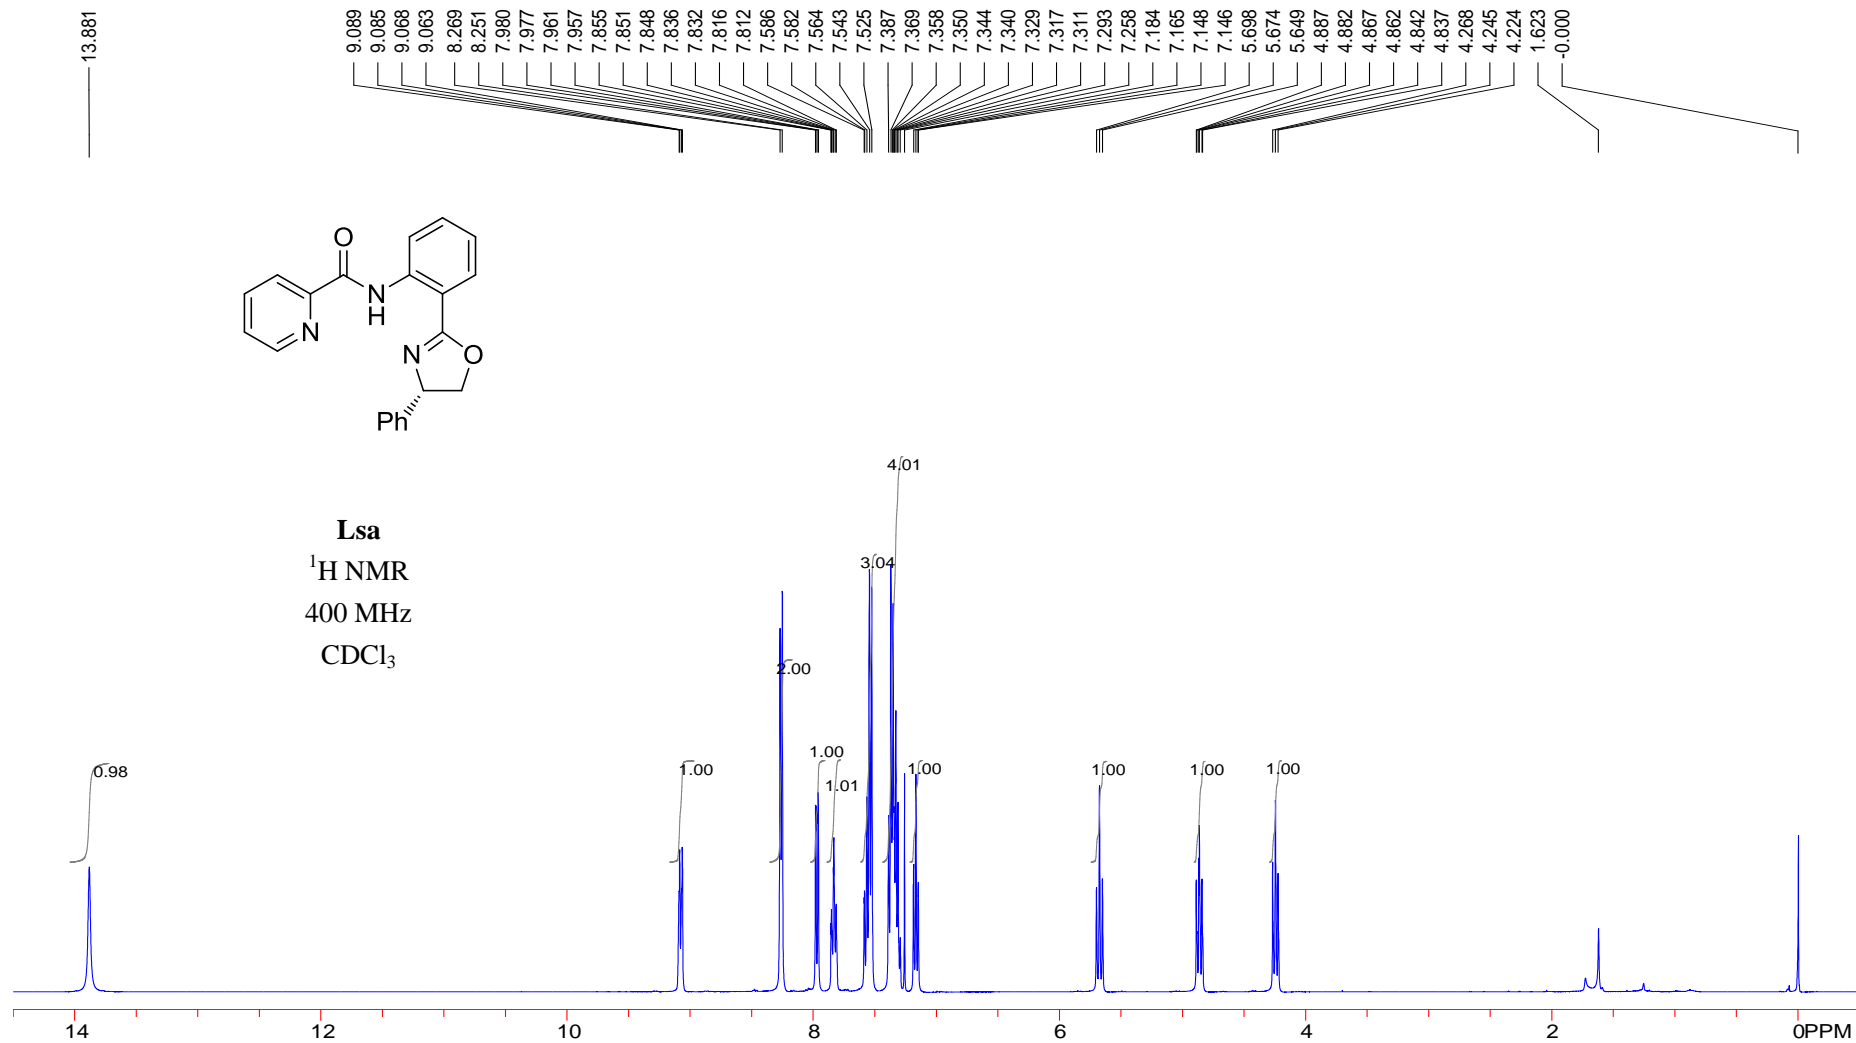

Supplementary Figure 5. <sup>1</sup>H NMR spectrum for Lsa

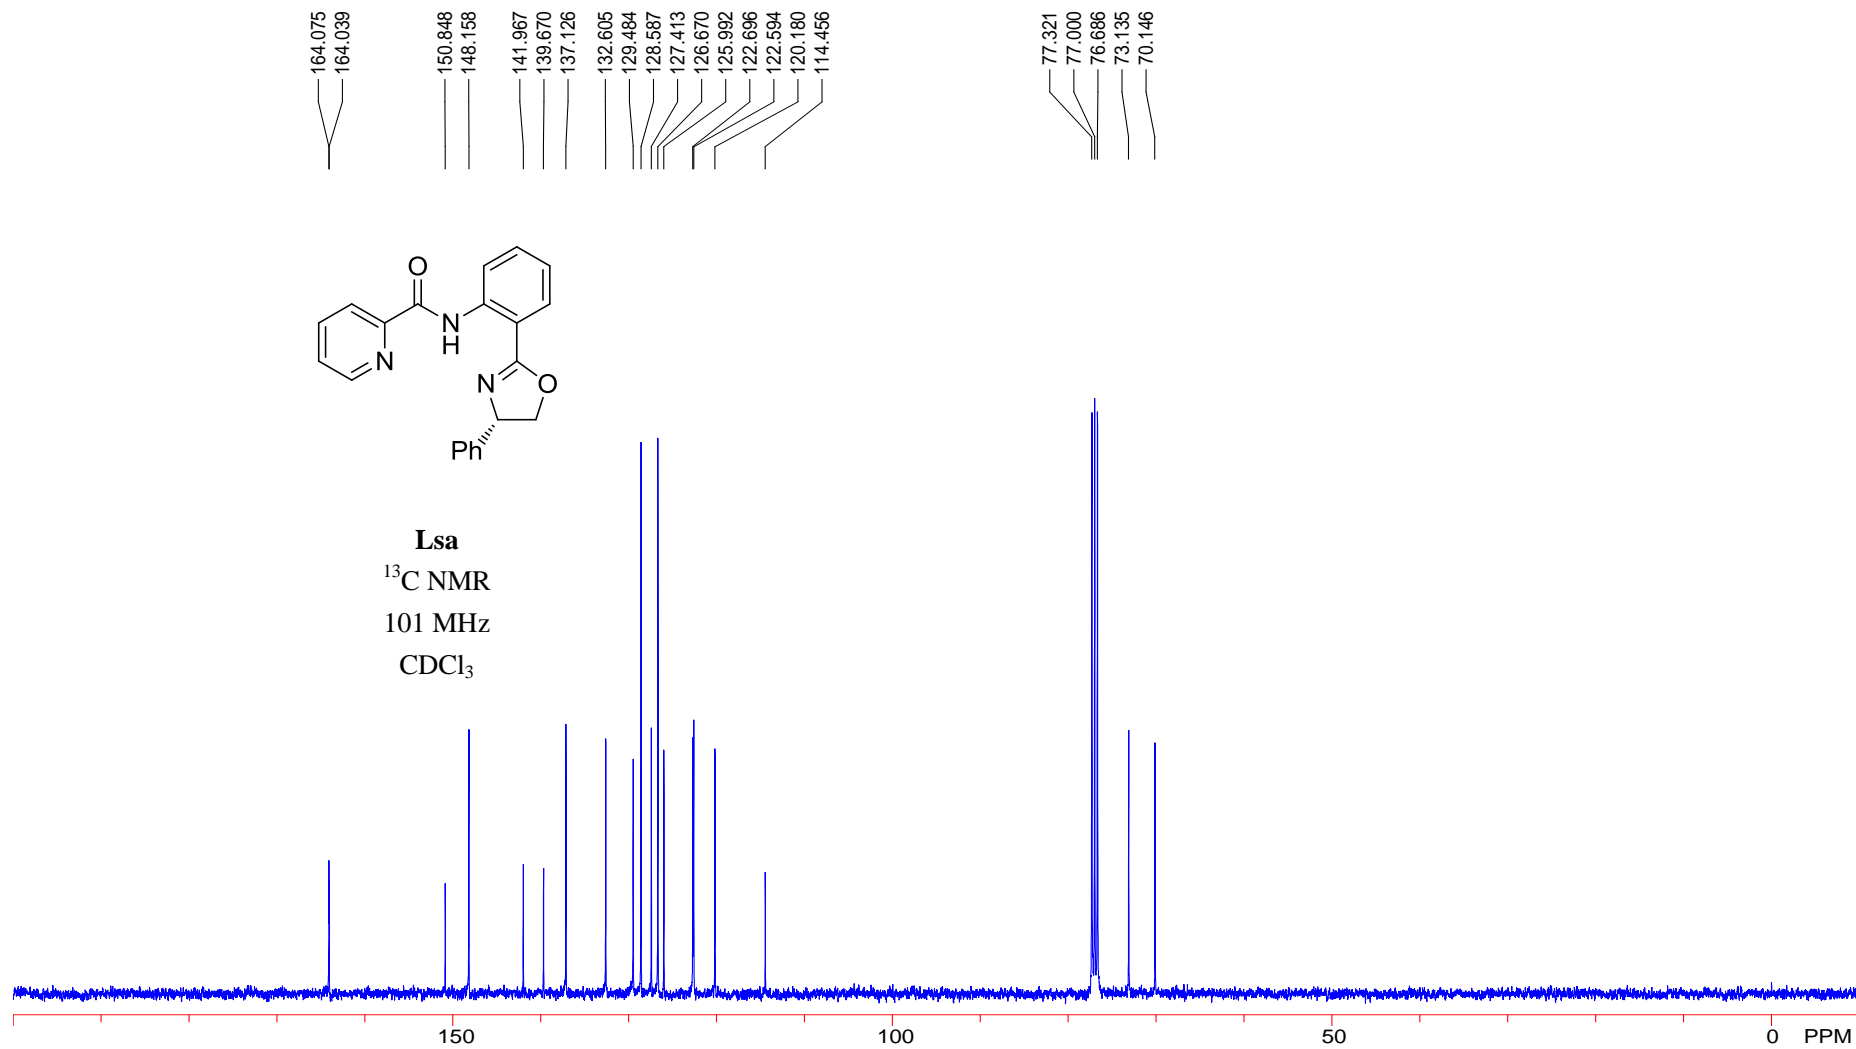

Supplementary Figure 6. <sup>13</sup>C NMR spectrum for Lsa

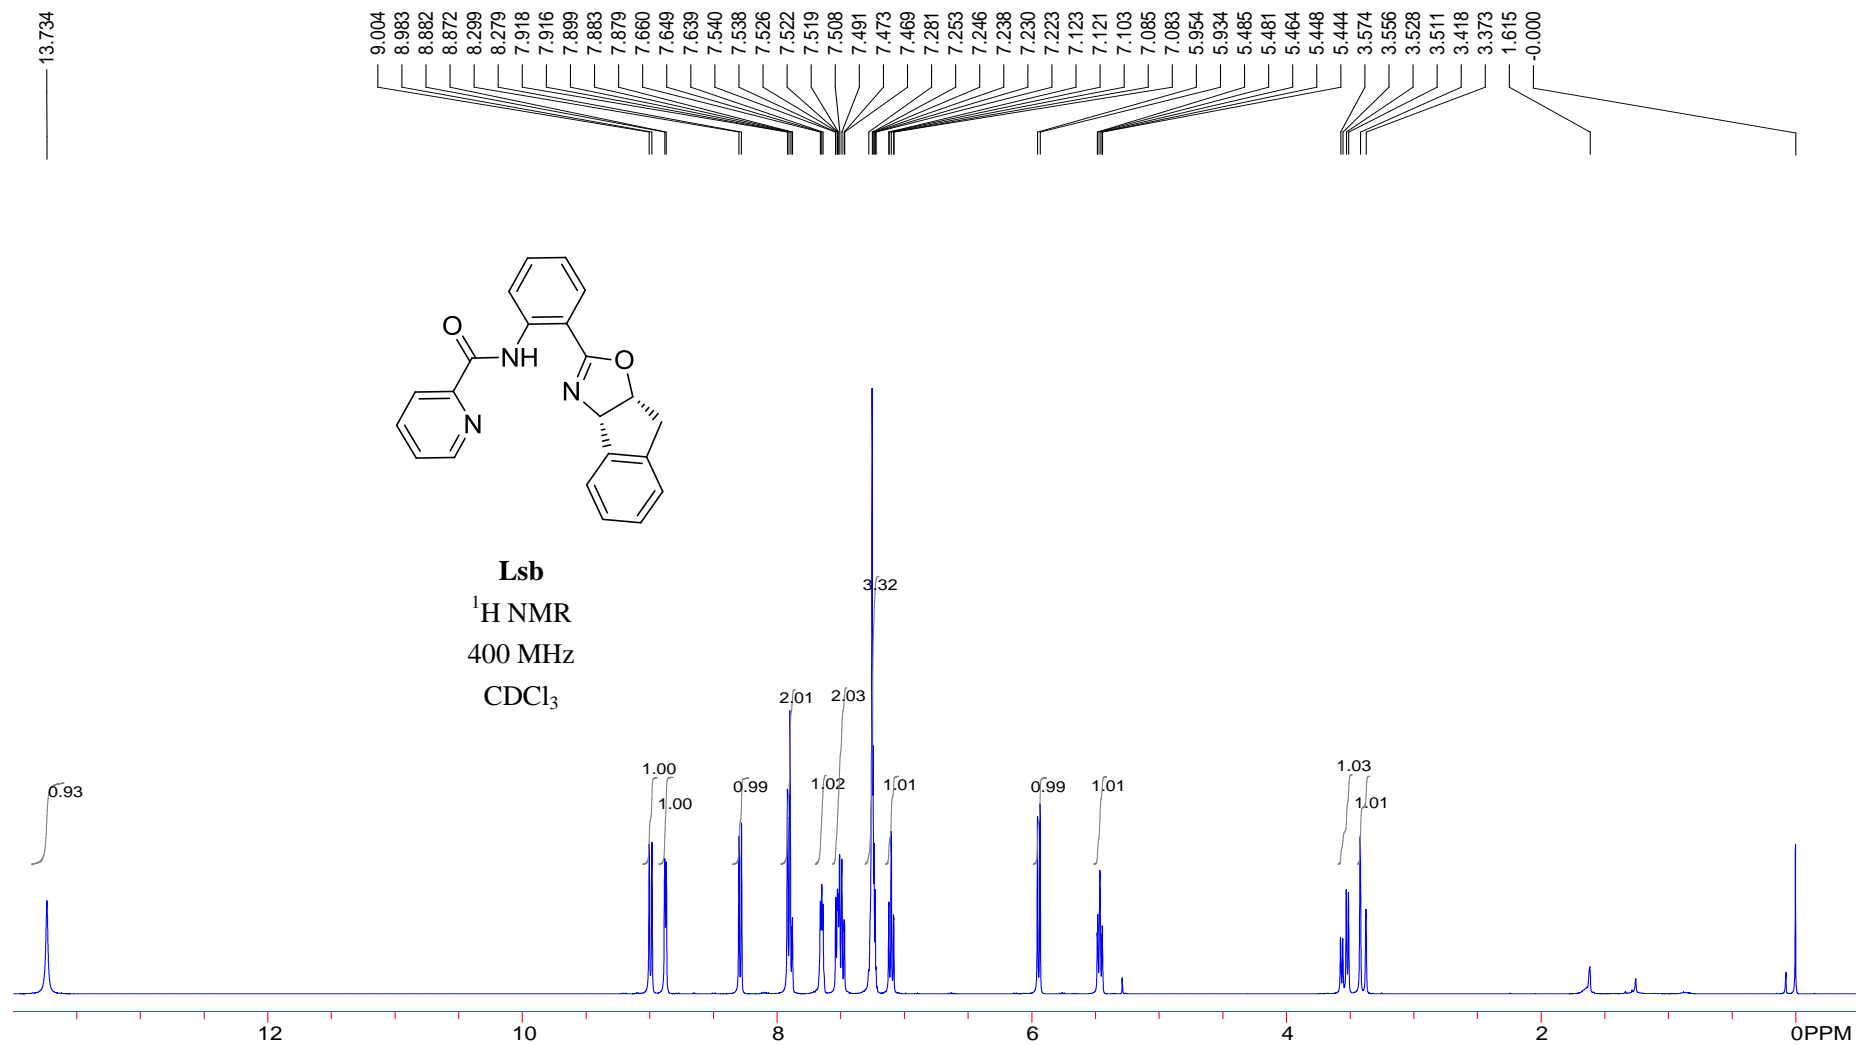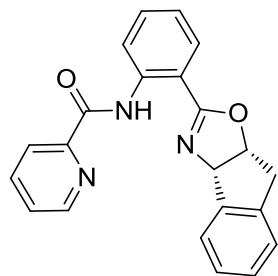

**Lsb**  
<sup>1</sup>H NMR  
 400 MHz  
 CDCl<sub>3</sub>

**Supplementary Figure 7. <sup>1</sup>H NMR spectrum for Lsb**



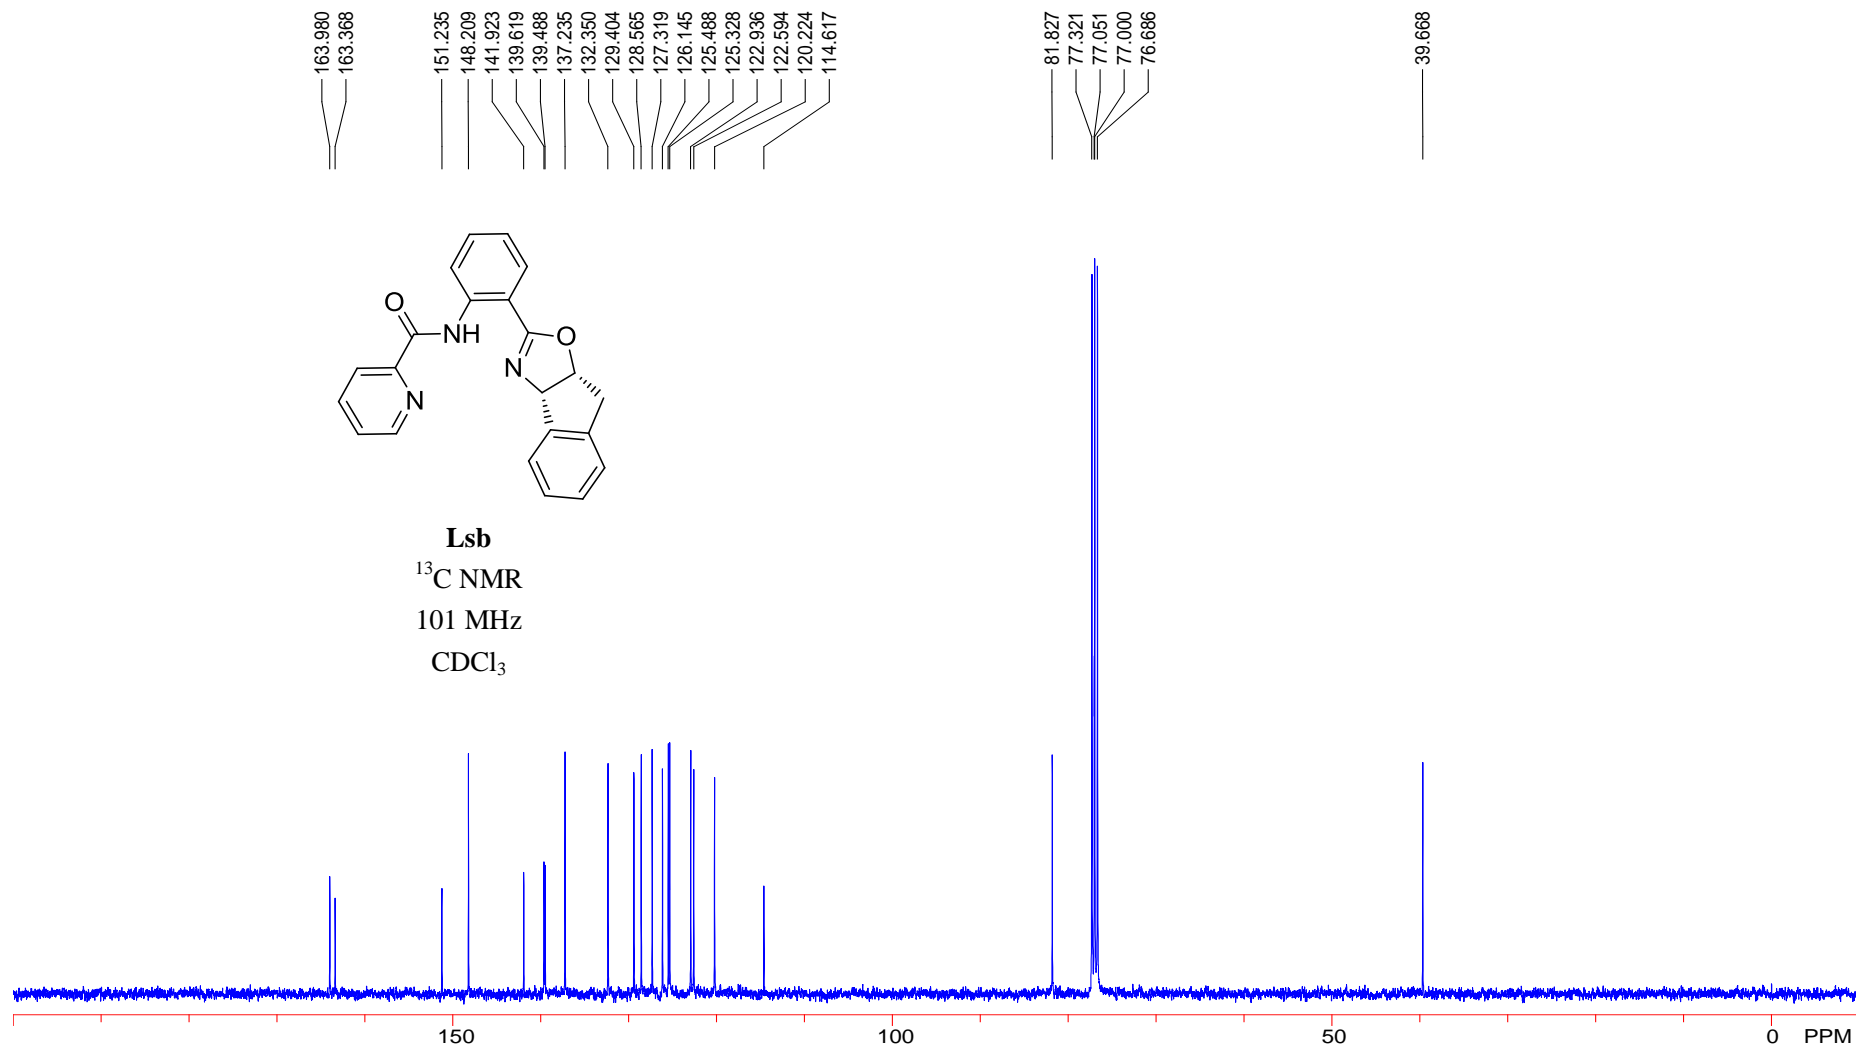

Supplementary Figure 8.  $^{13}\text{C}$  NMR spectrum for Lsb

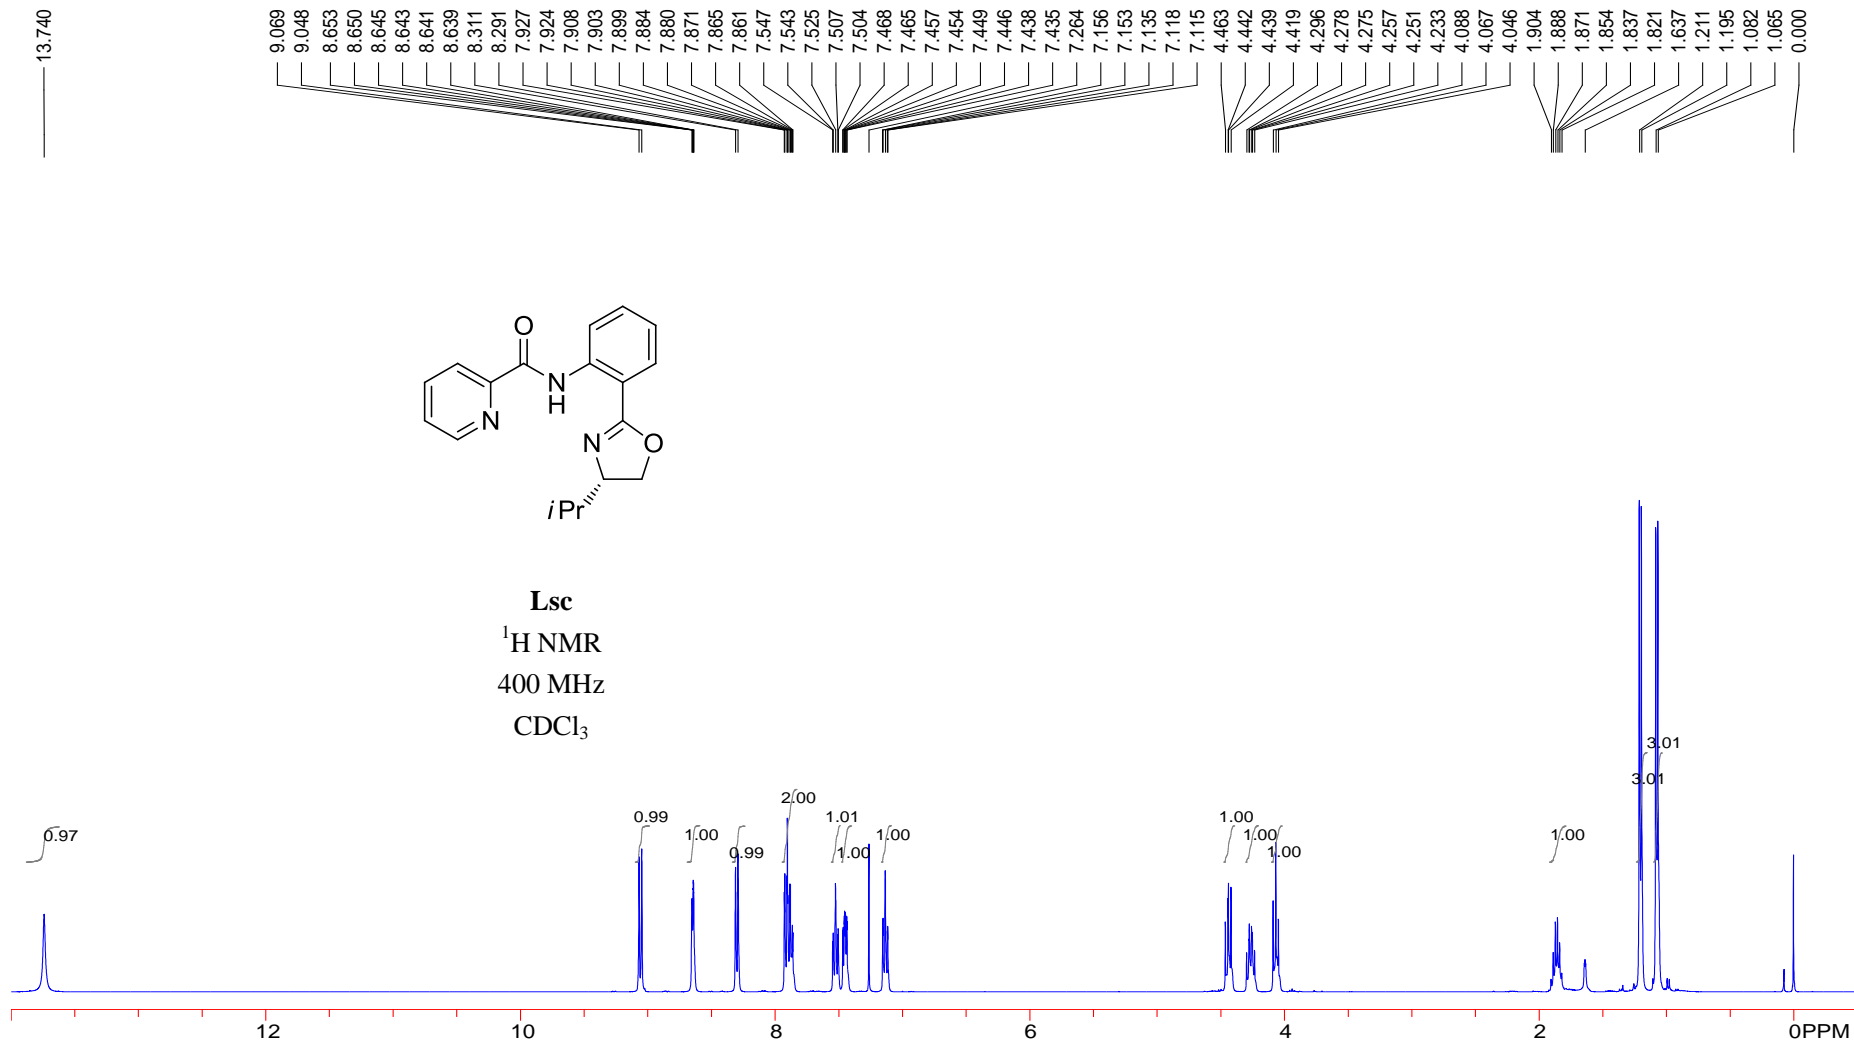

Supplementary Figure 9. <sup>1</sup>H NMR spectrum for Lsc

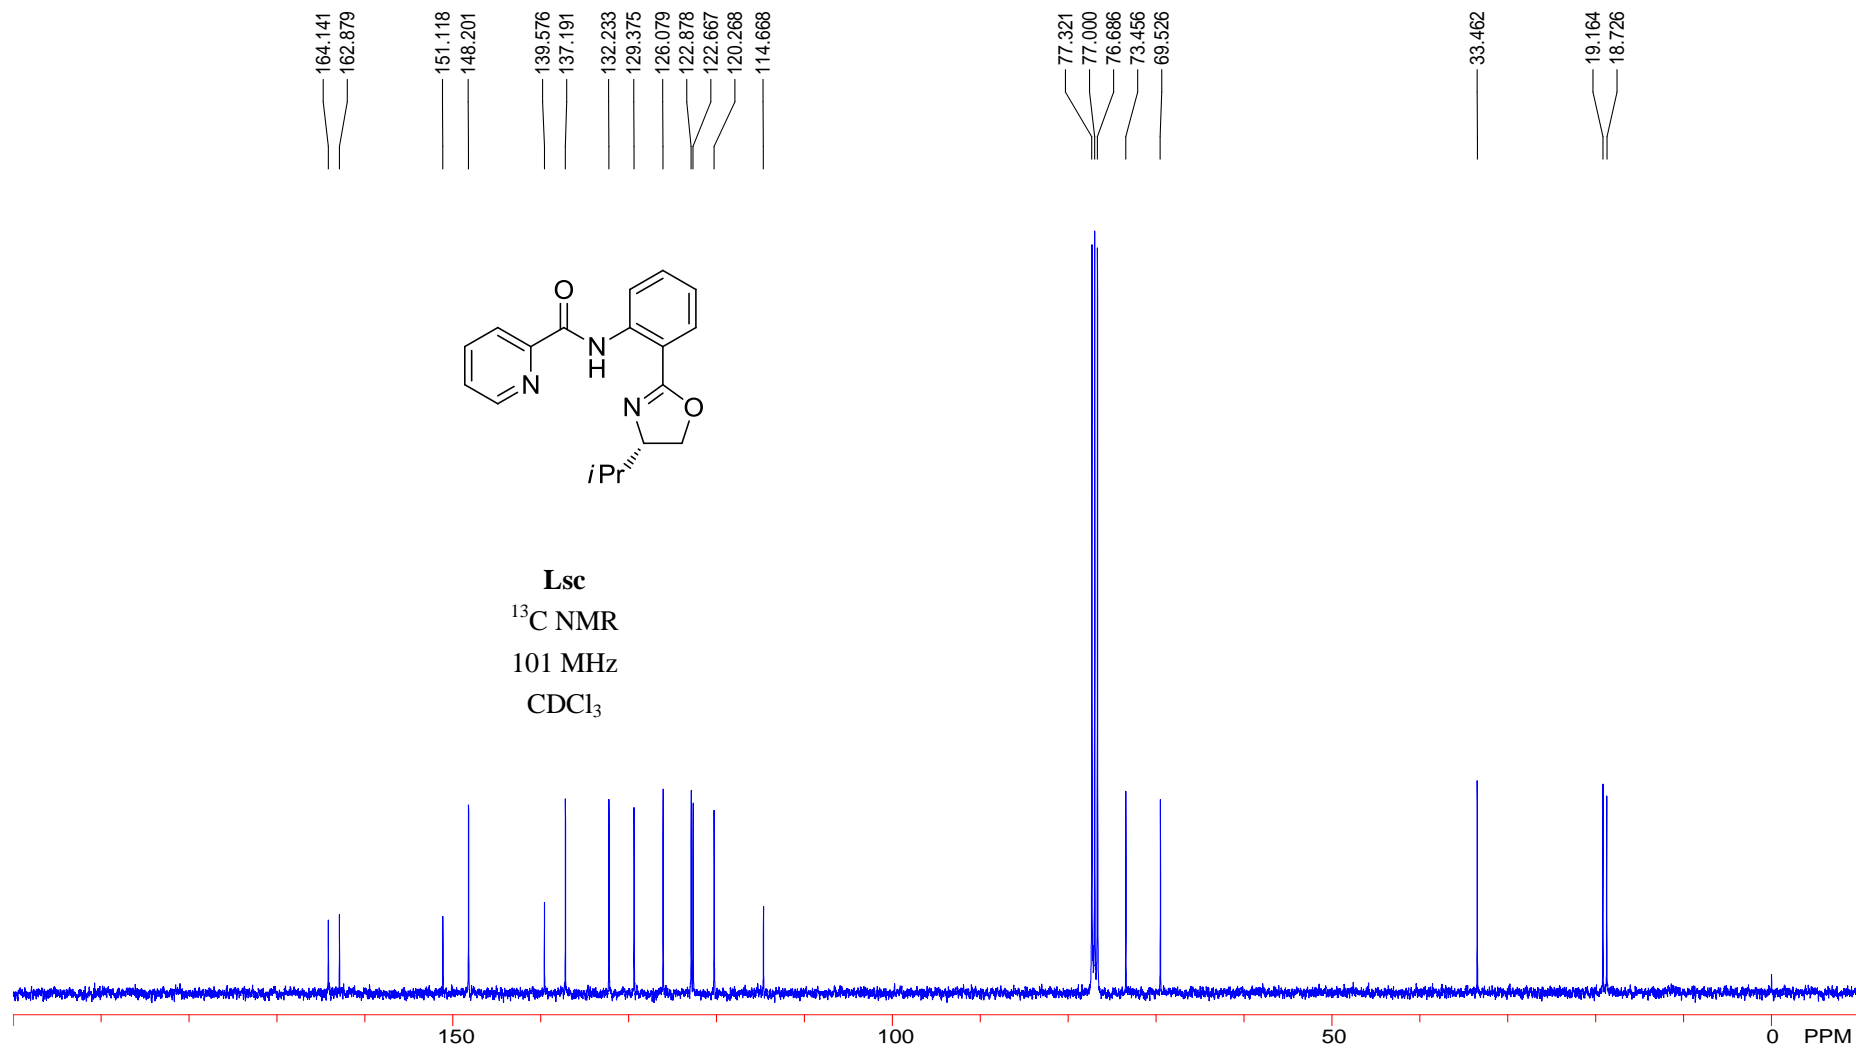

**Supplementary Figure 10.** <sup>13</sup>C NMR spectrum for **Lsc**

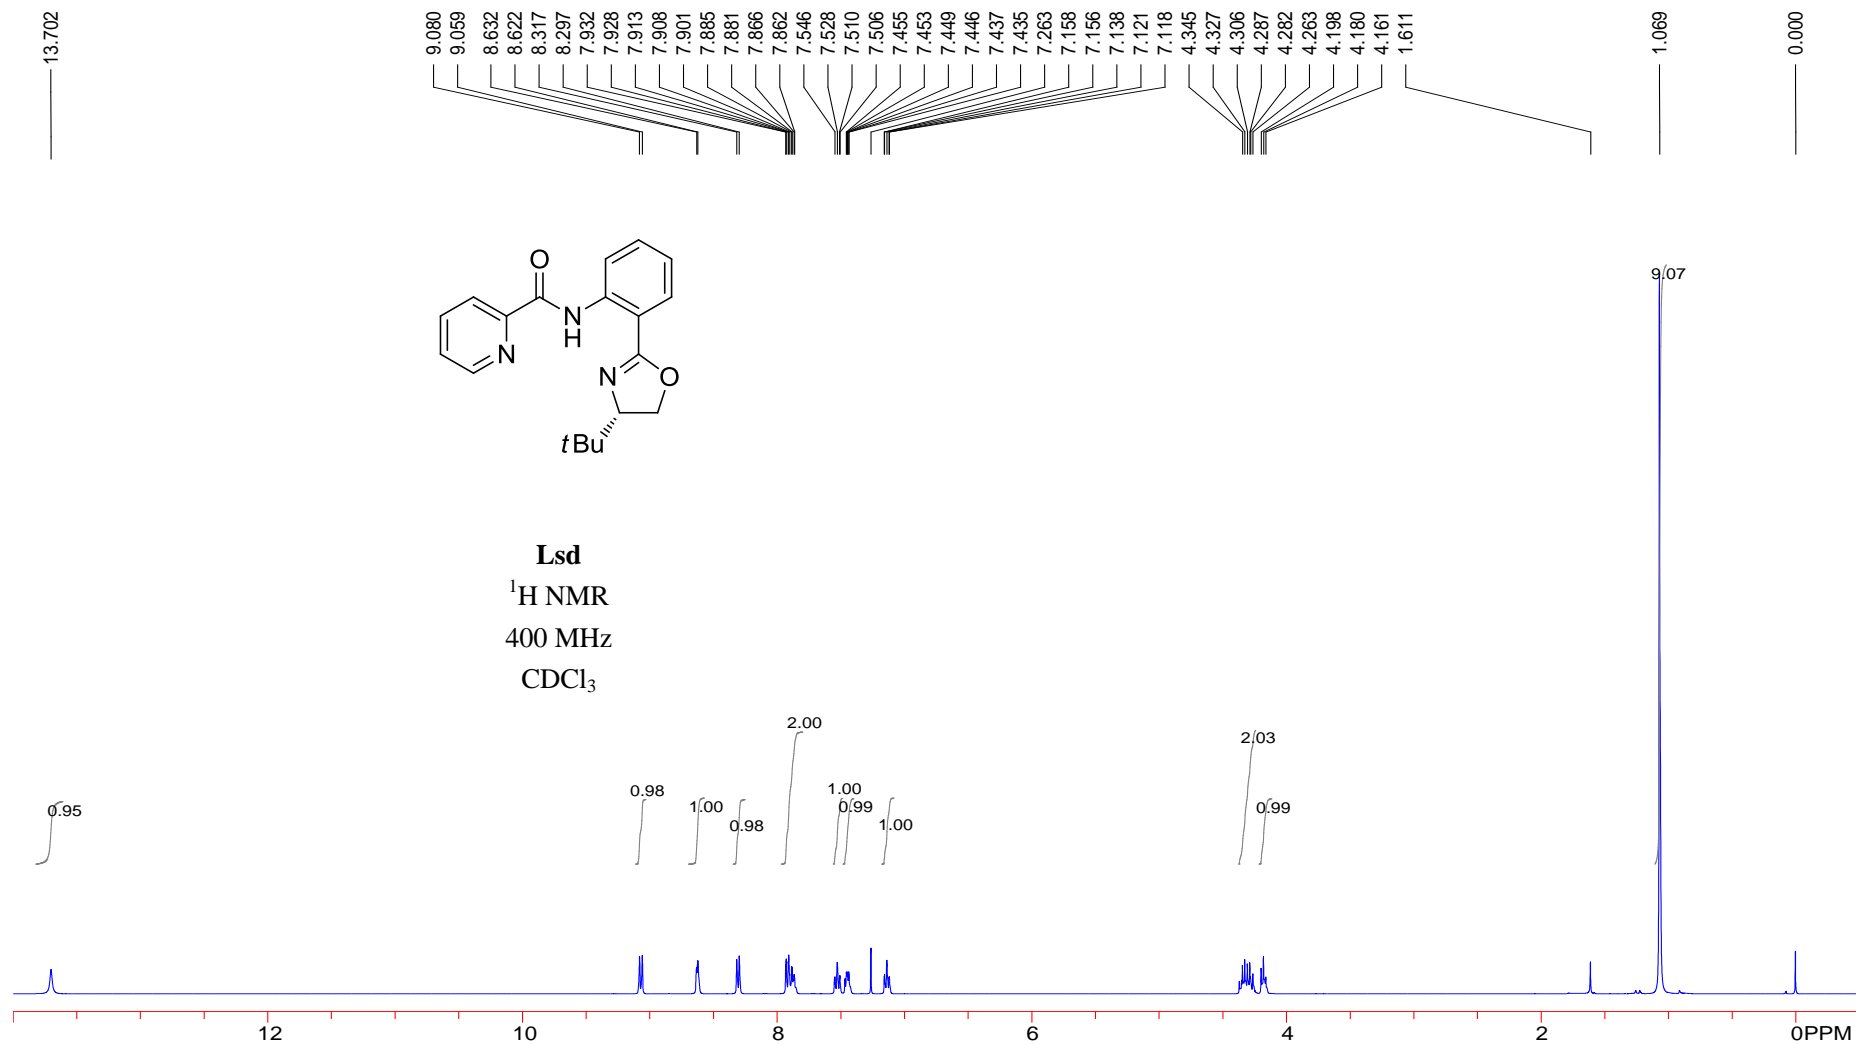

Supplementary Figure 11. <sup>1</sup>H NMR spectrum for Lsd

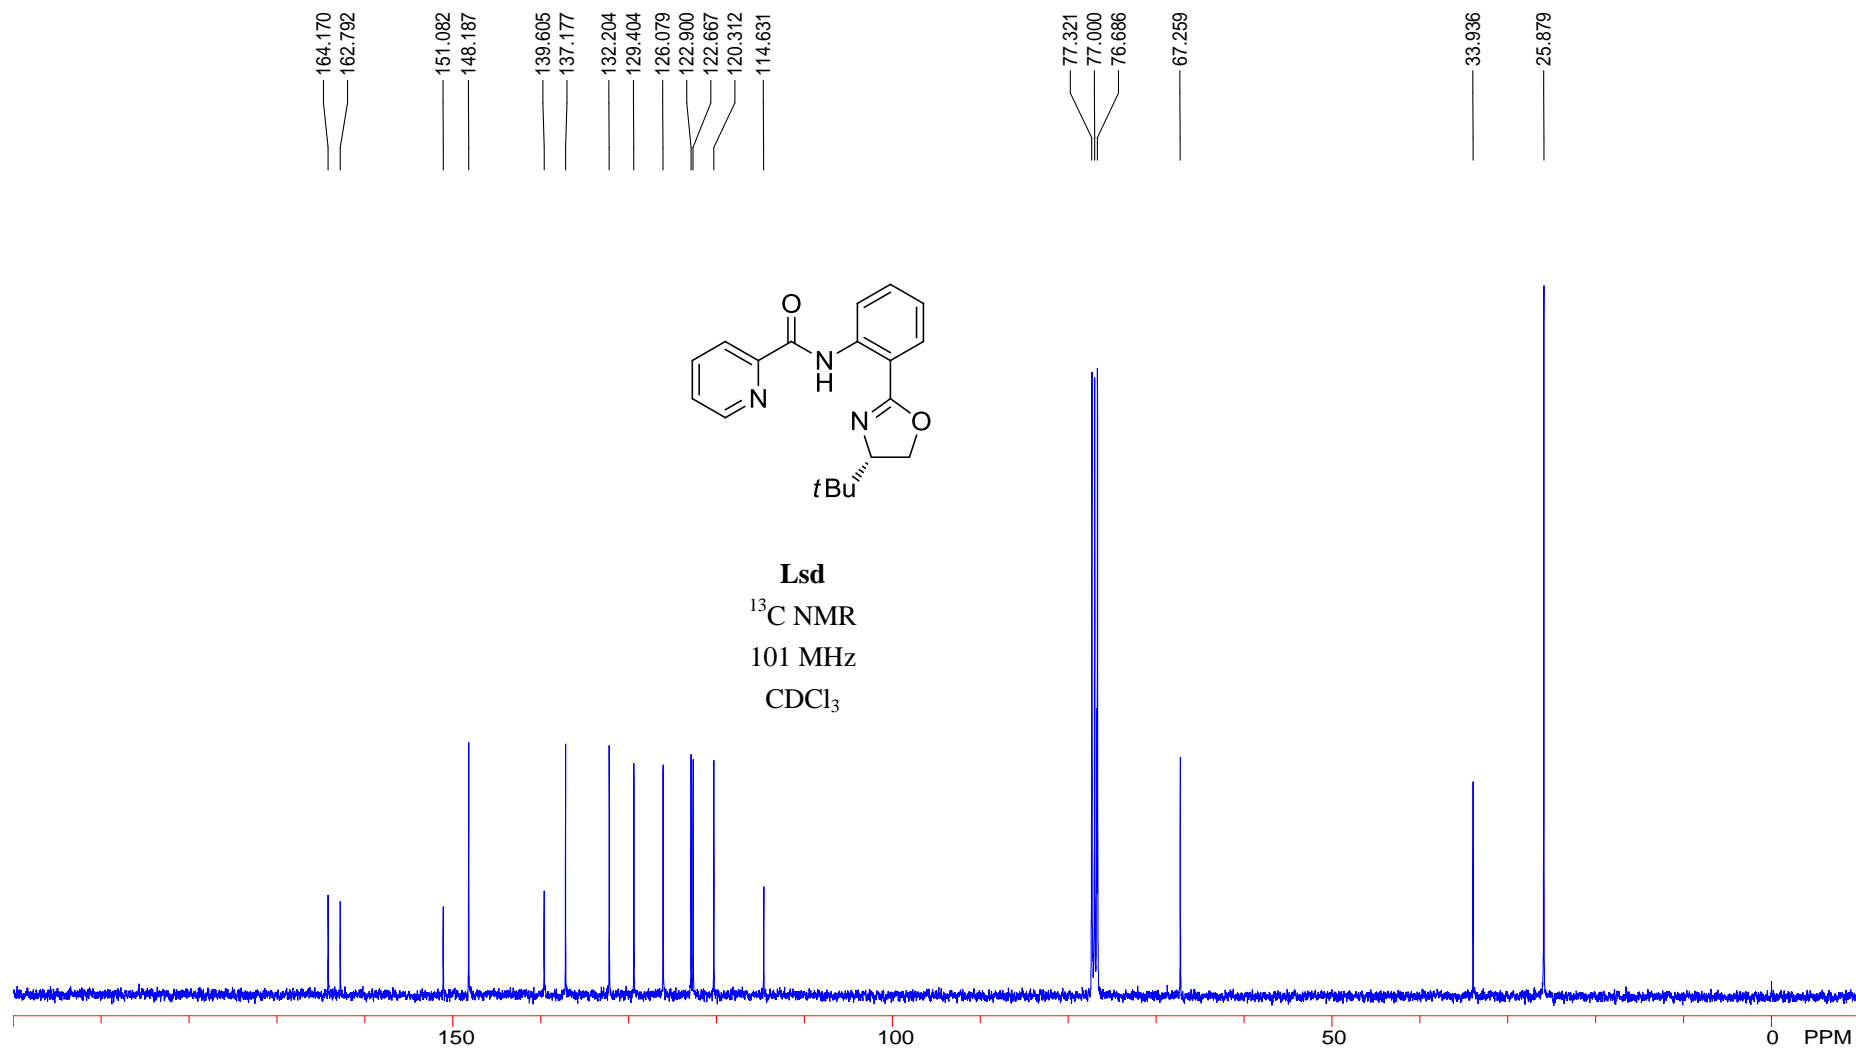

Supplementary Figure 12. <sup>13</sup>C NMR spectrum for Lsd

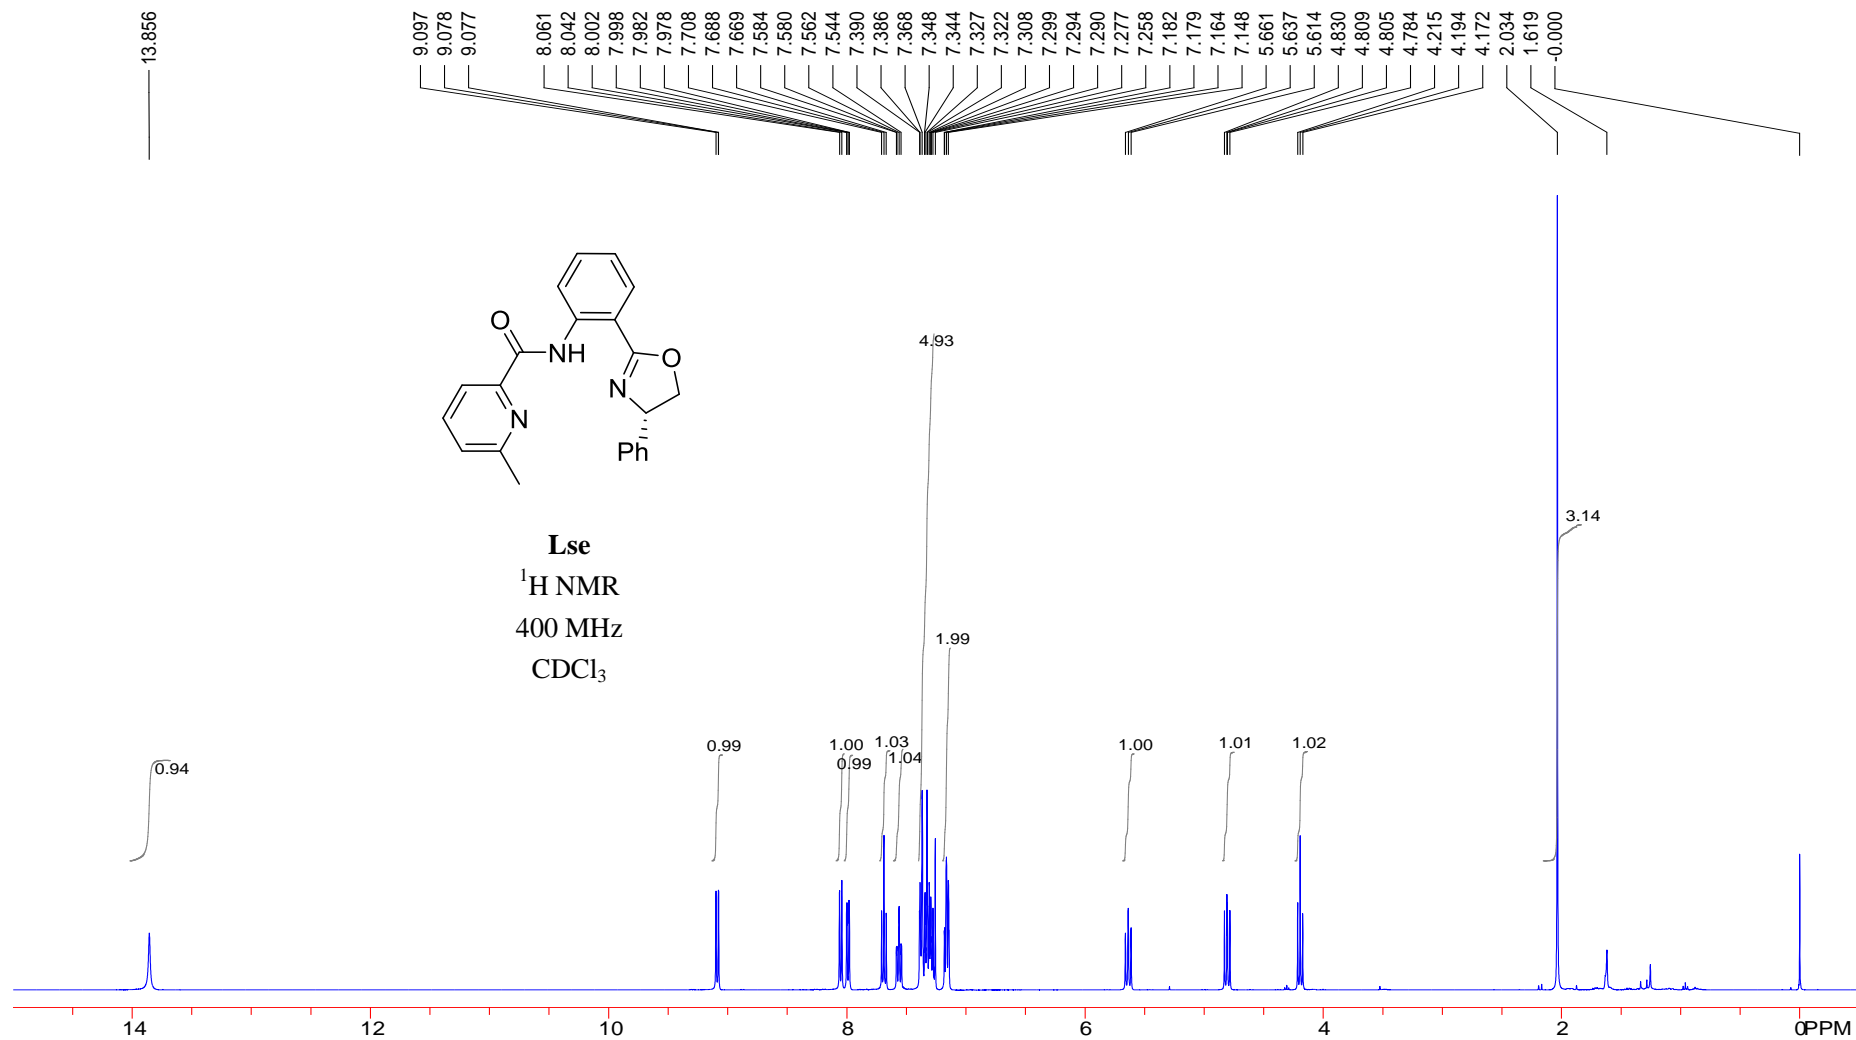

Supplementary Figure 13.  $^1\text{H}$  NMR spectrum for Lse

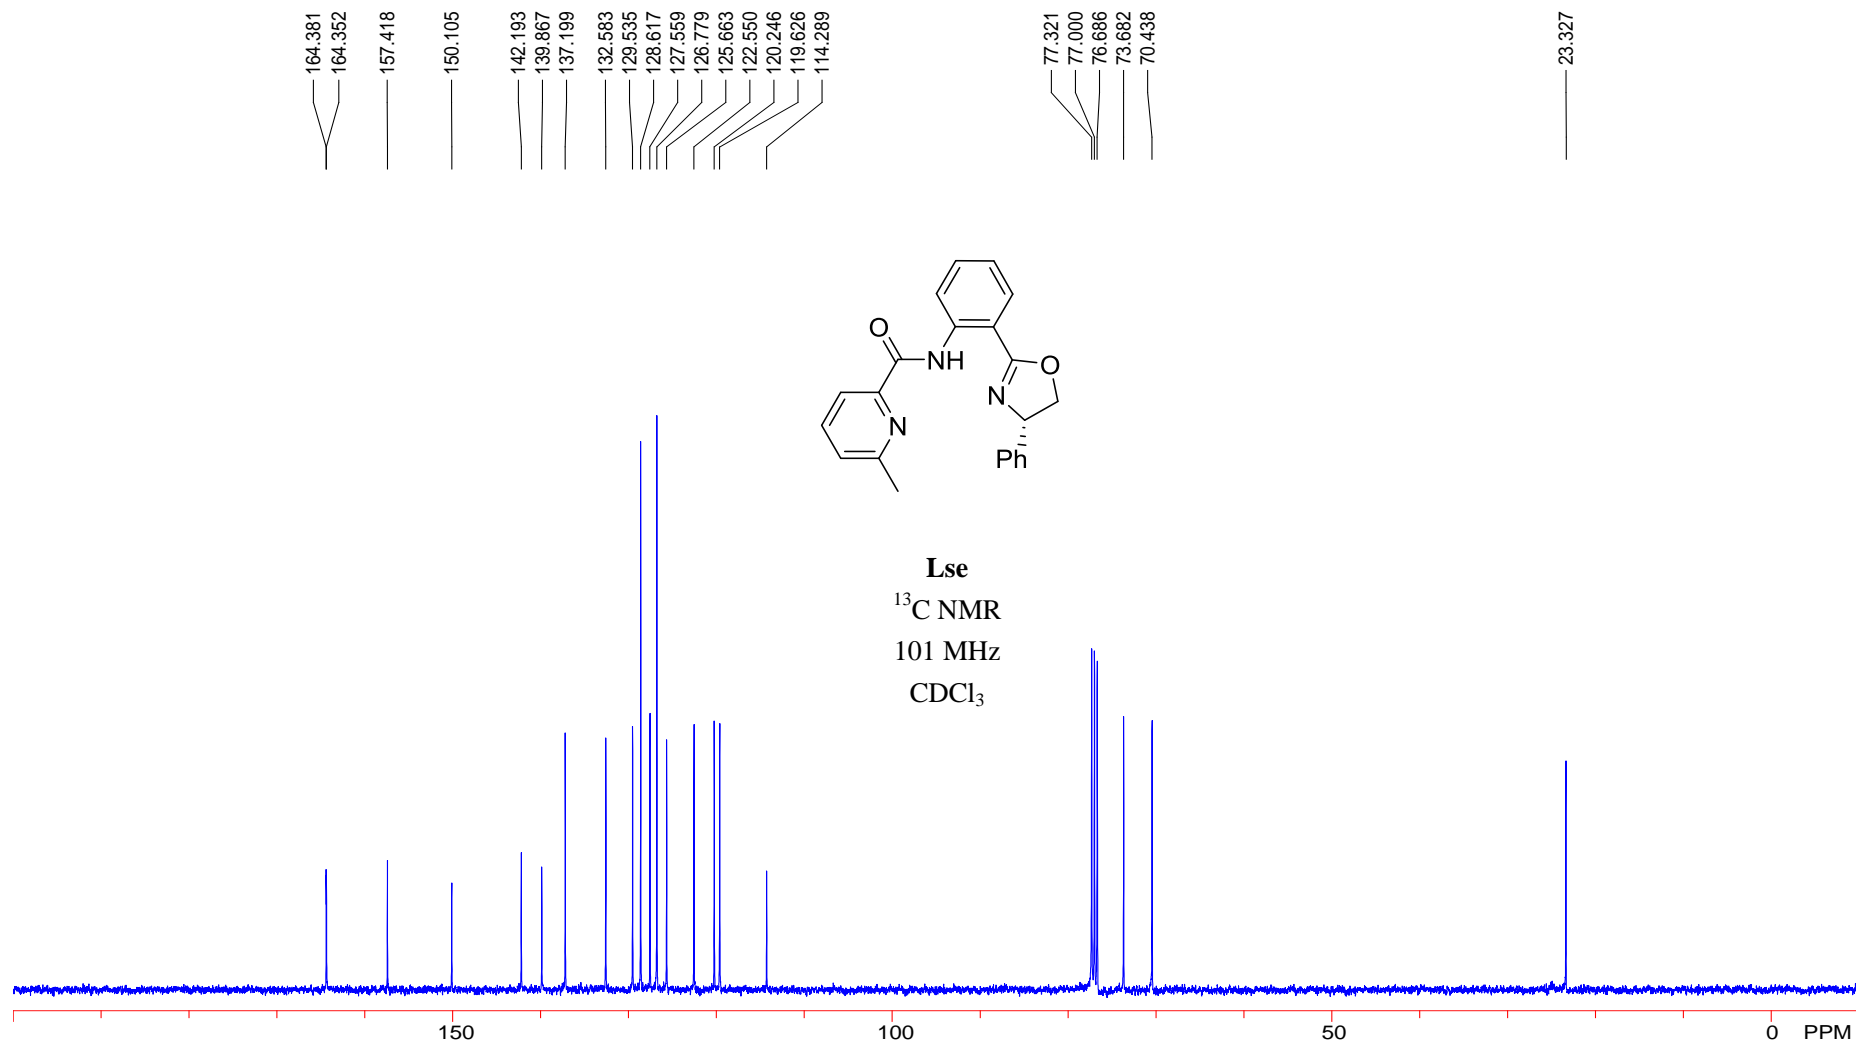

**Supplementary Figure 14.** <sup>13</sup>C NMR spectrum for Lse

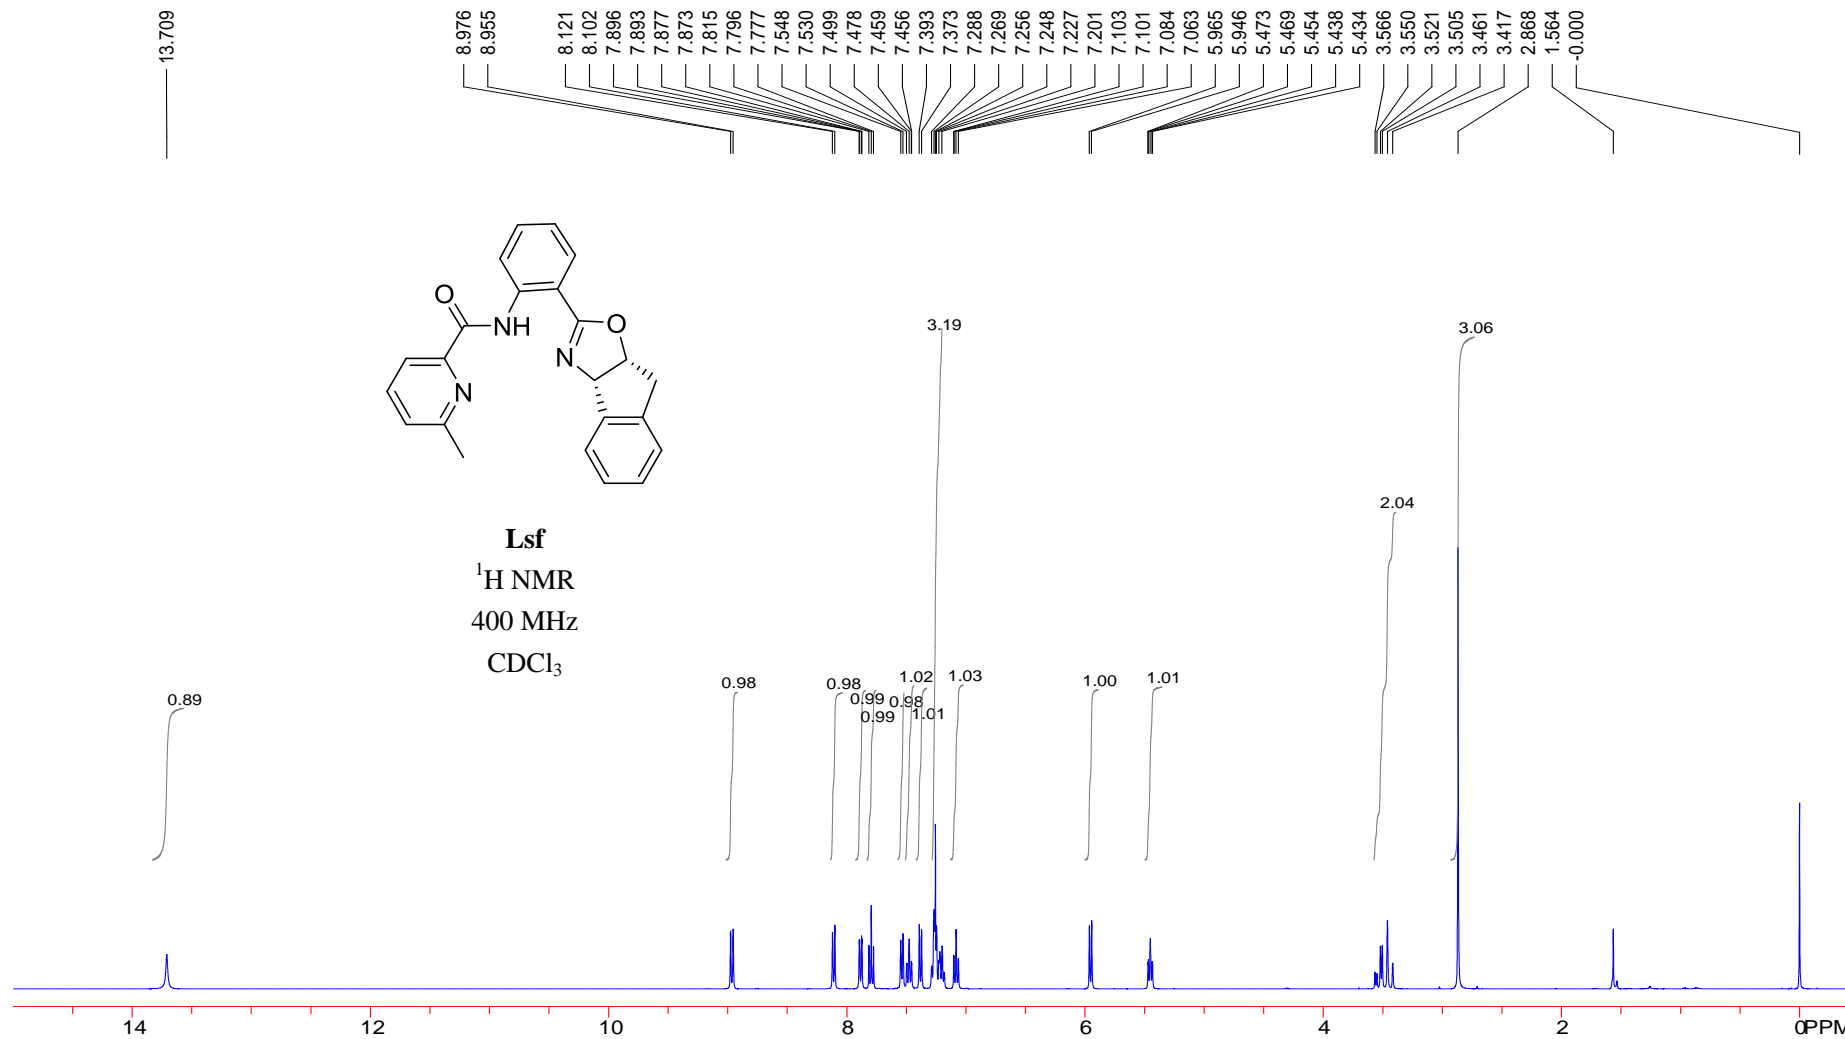

Supplementary Figure 15. <sup>1</sup>H NMR spectrum for Lsf



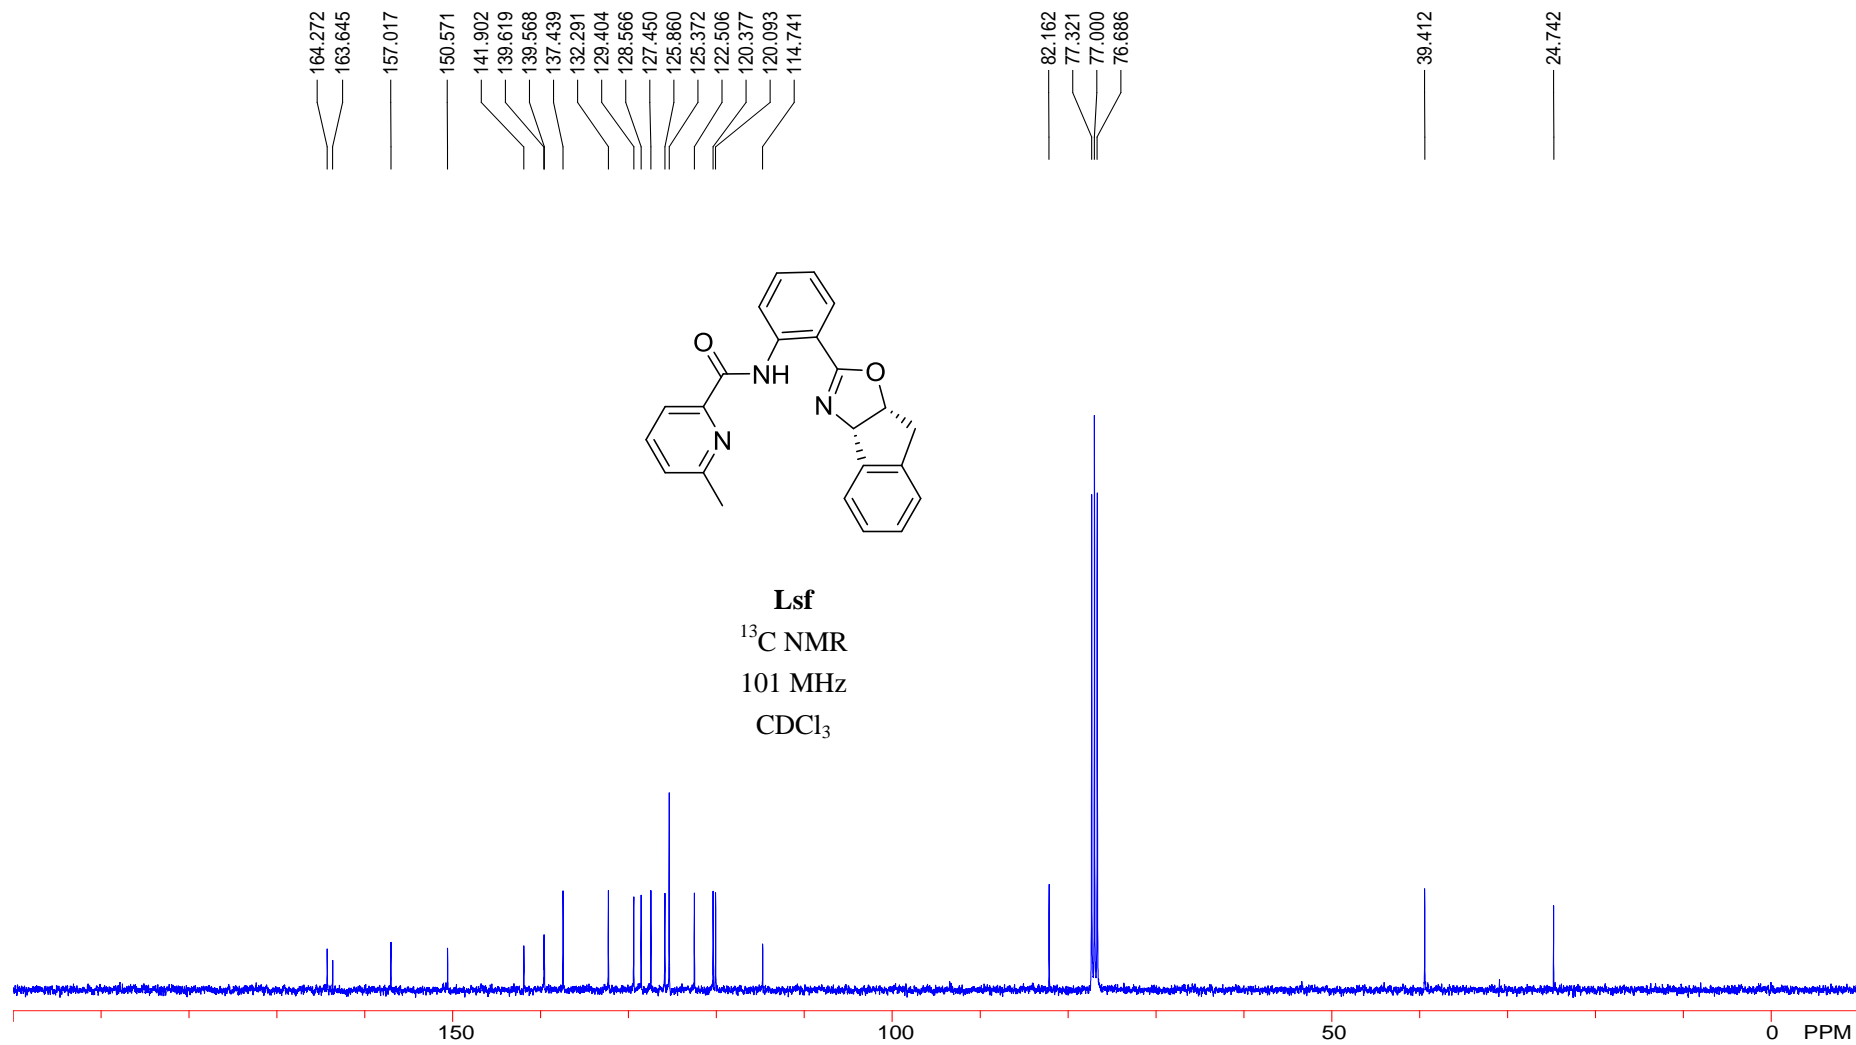

**Supplementary Figure 16.** <sup>13</sup>C NMR spectrum for **Lsf**

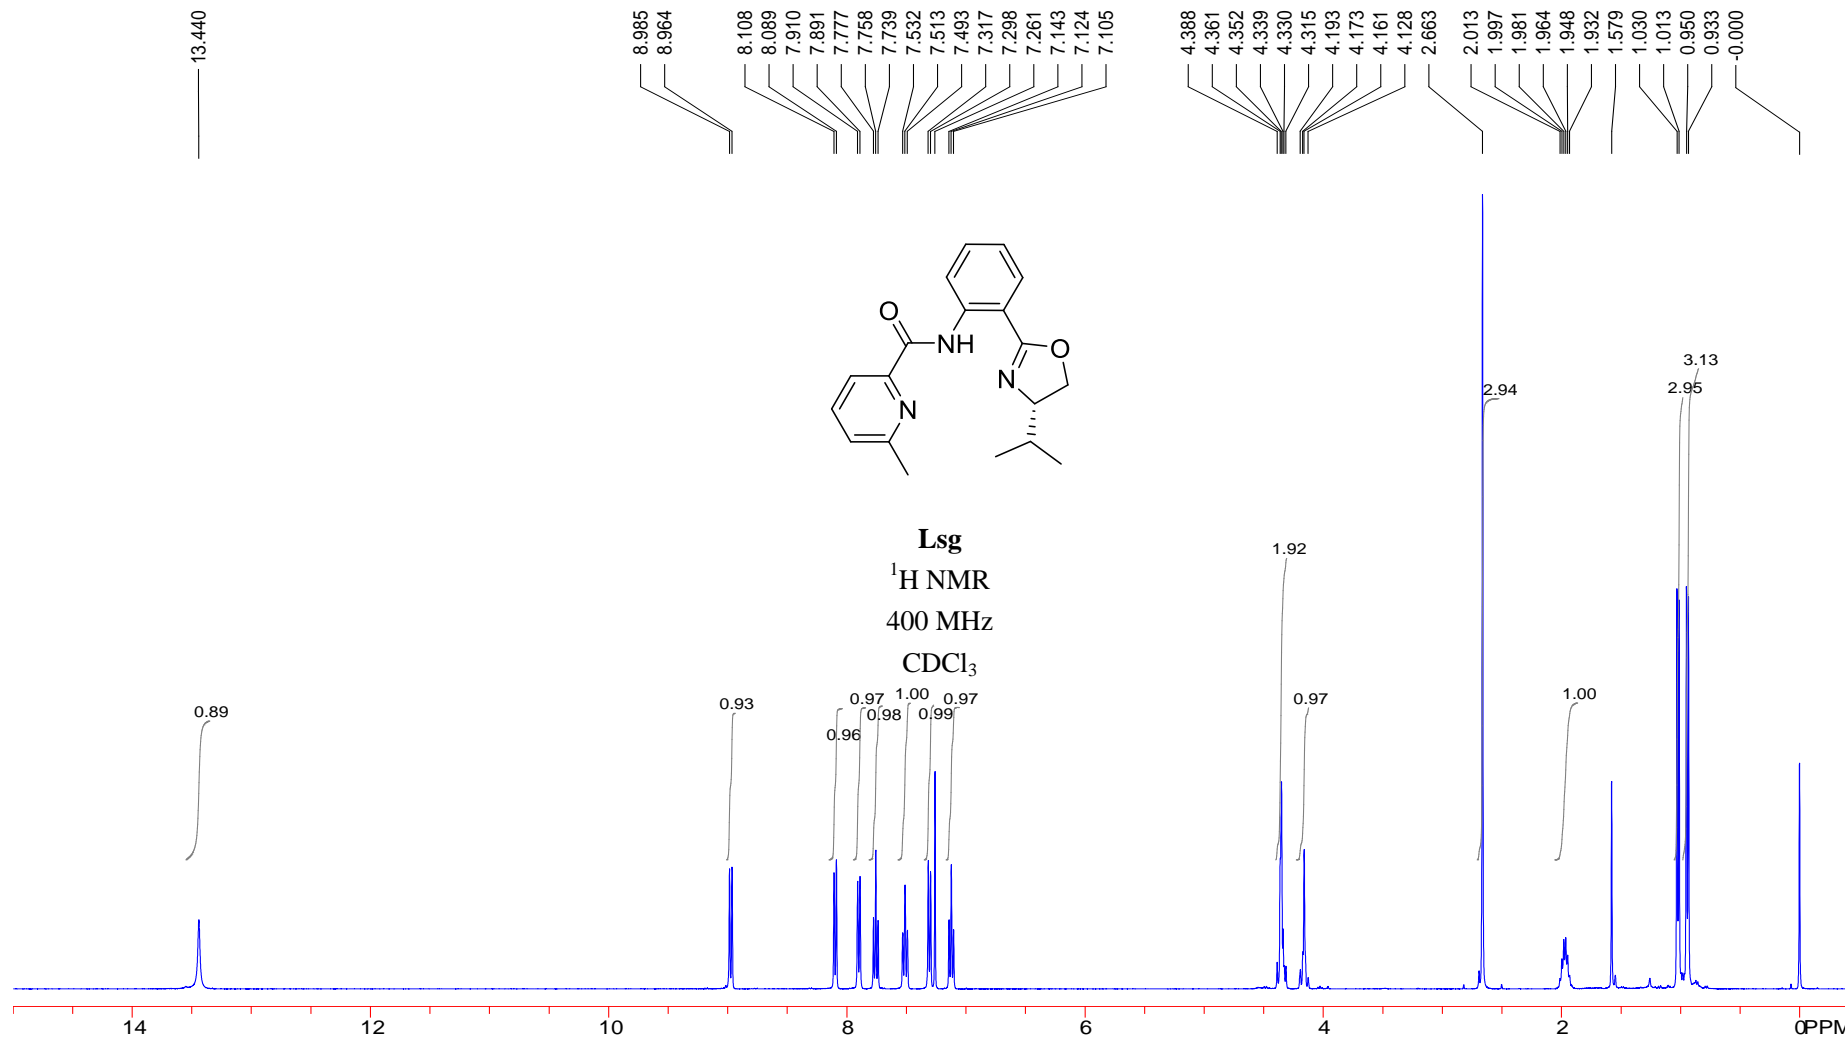

Supplementary Figure 17. <sup>1</sup>H NMR spectrum for Lsd

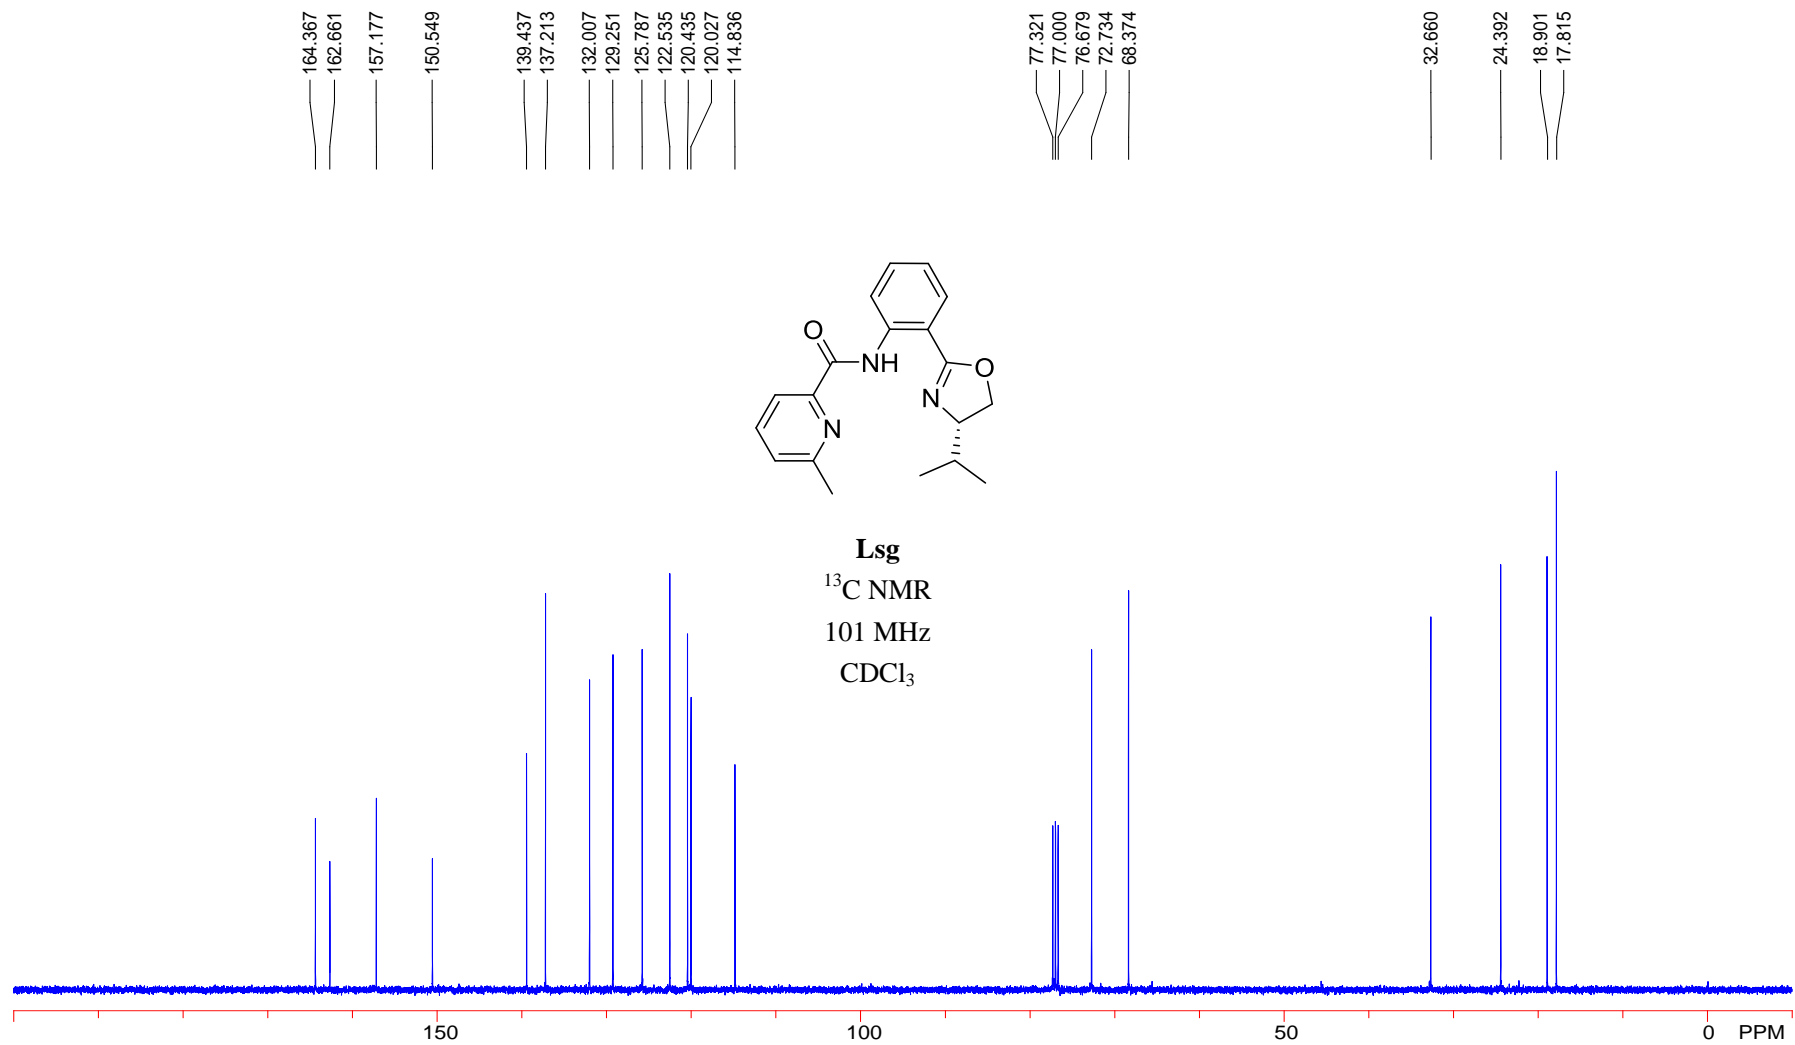

Supplementary Figure 18. <sup>13</sup>C NMR spectrum for Lsg

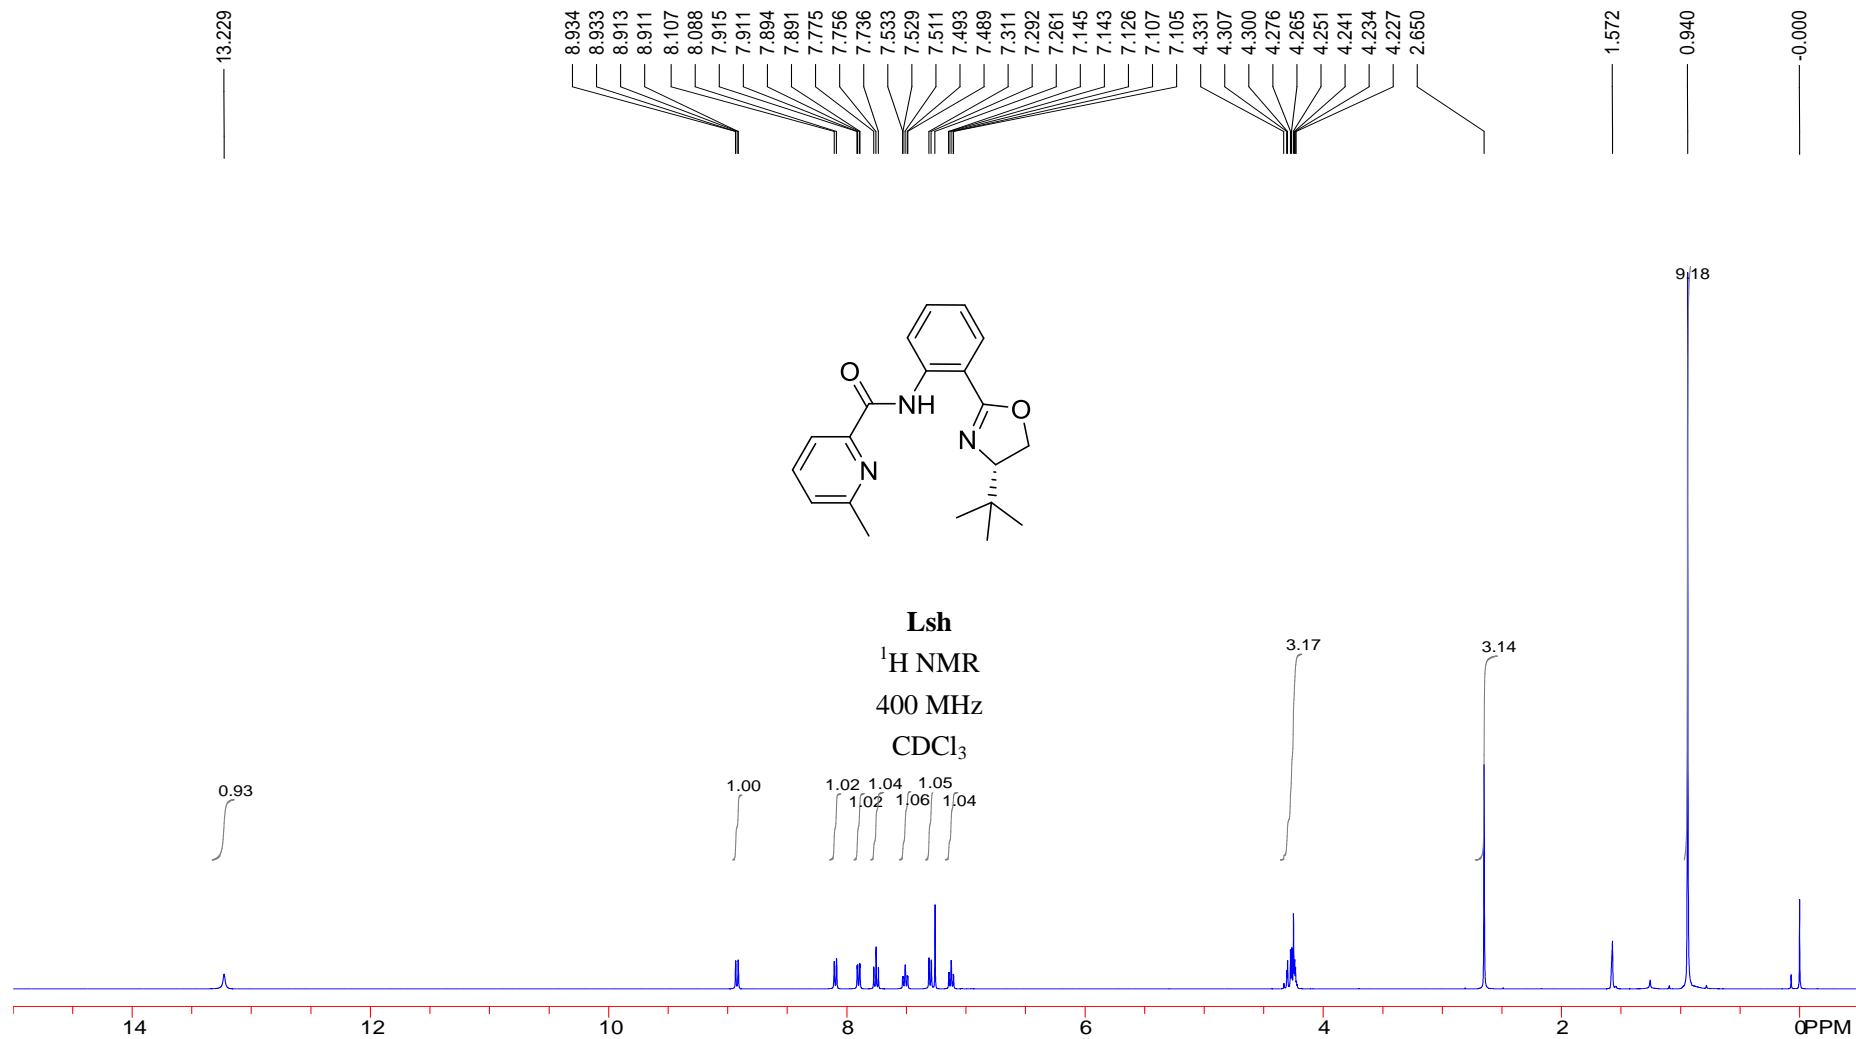

**Supplementary Figure 19. <sup>1</sup>H NMR spectrum for Lsh**

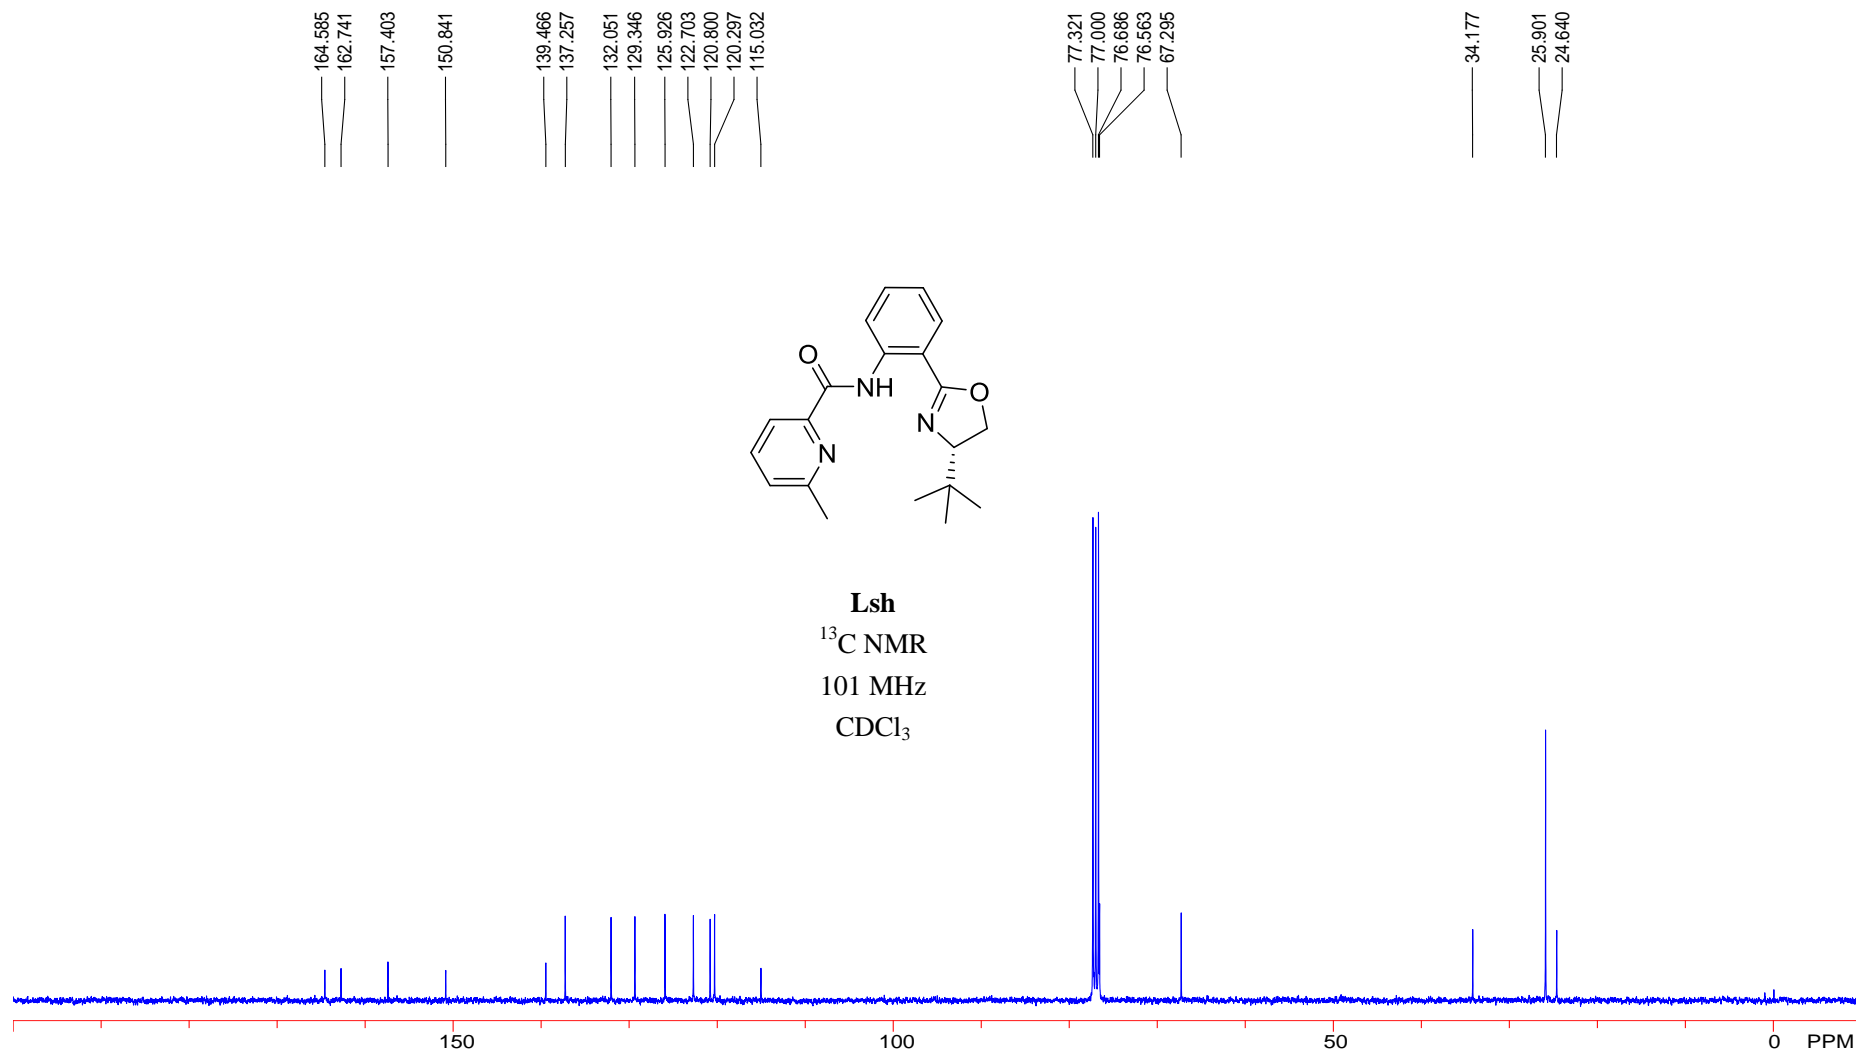

Supplementary Figure 20. <sup>13</sup>C NMR spectrum for Lsh

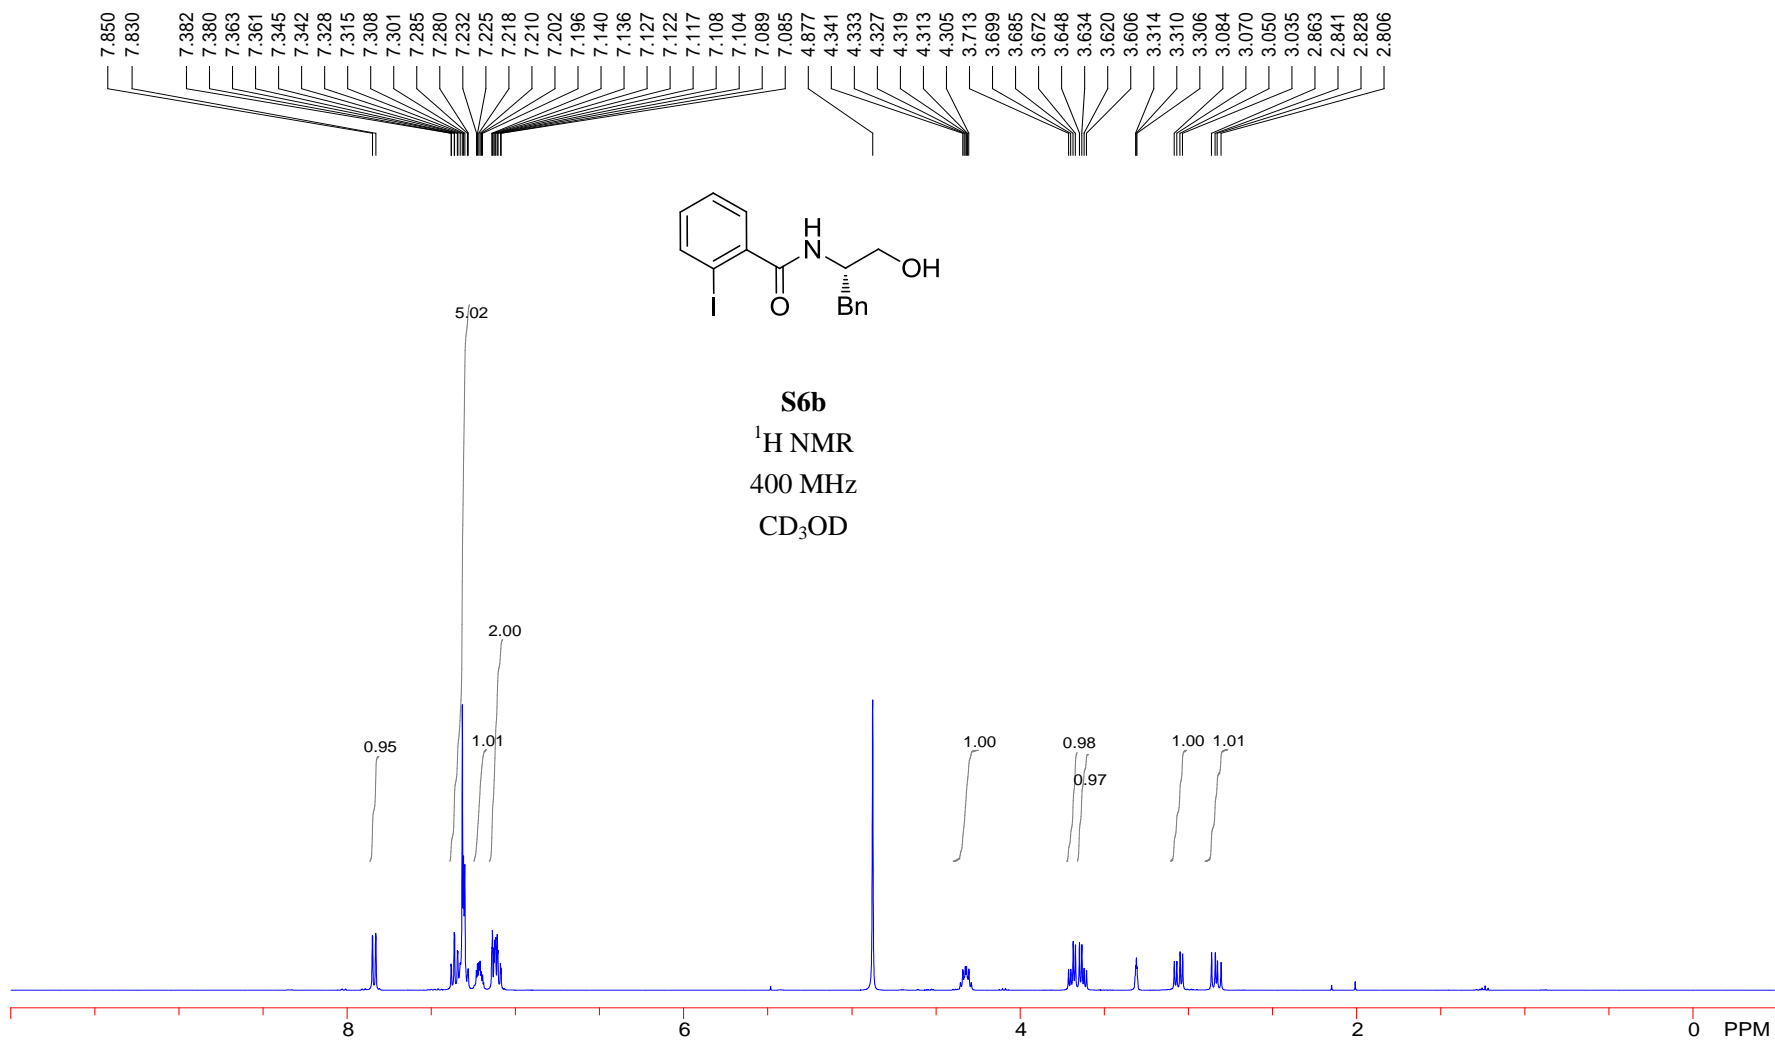

Supplementary Figure 21. <sup>1</sup>H NMR spectrum for s6b

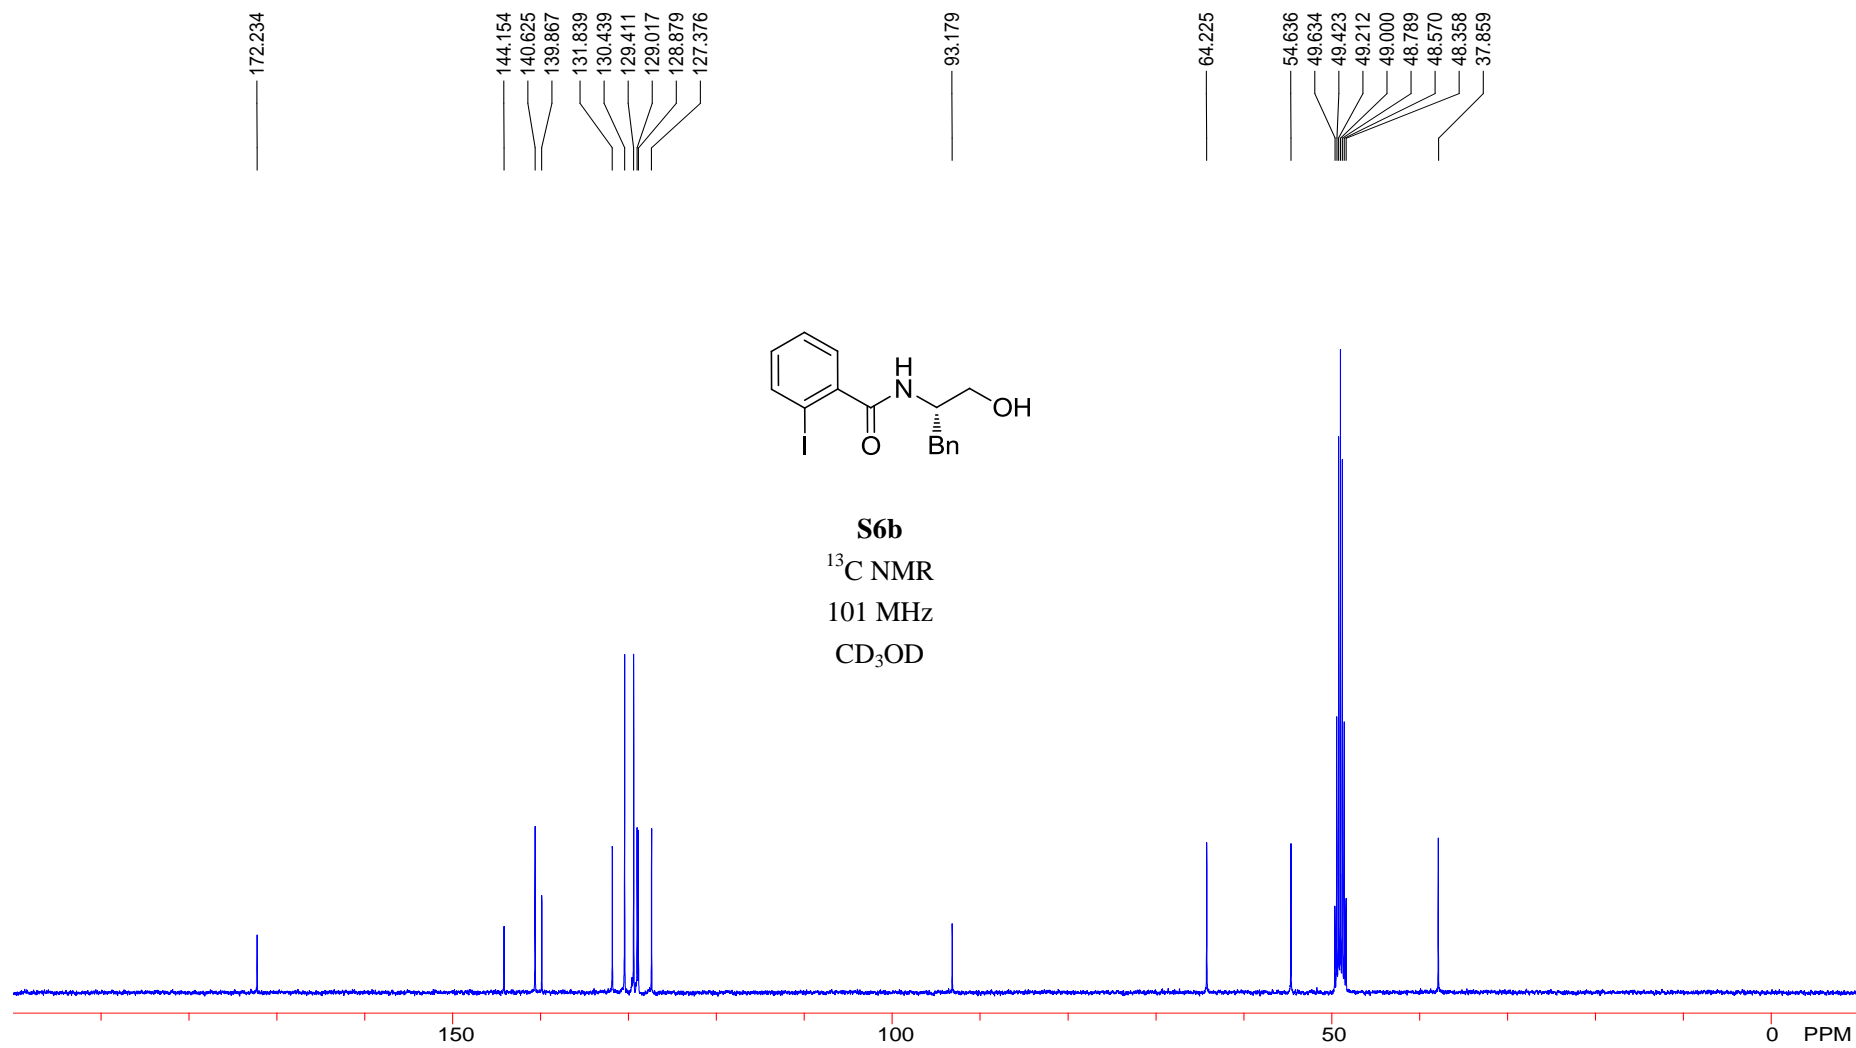

**Supplementary Figure 22.** <sup>13</sup>C NMR spectrum for **s6b**

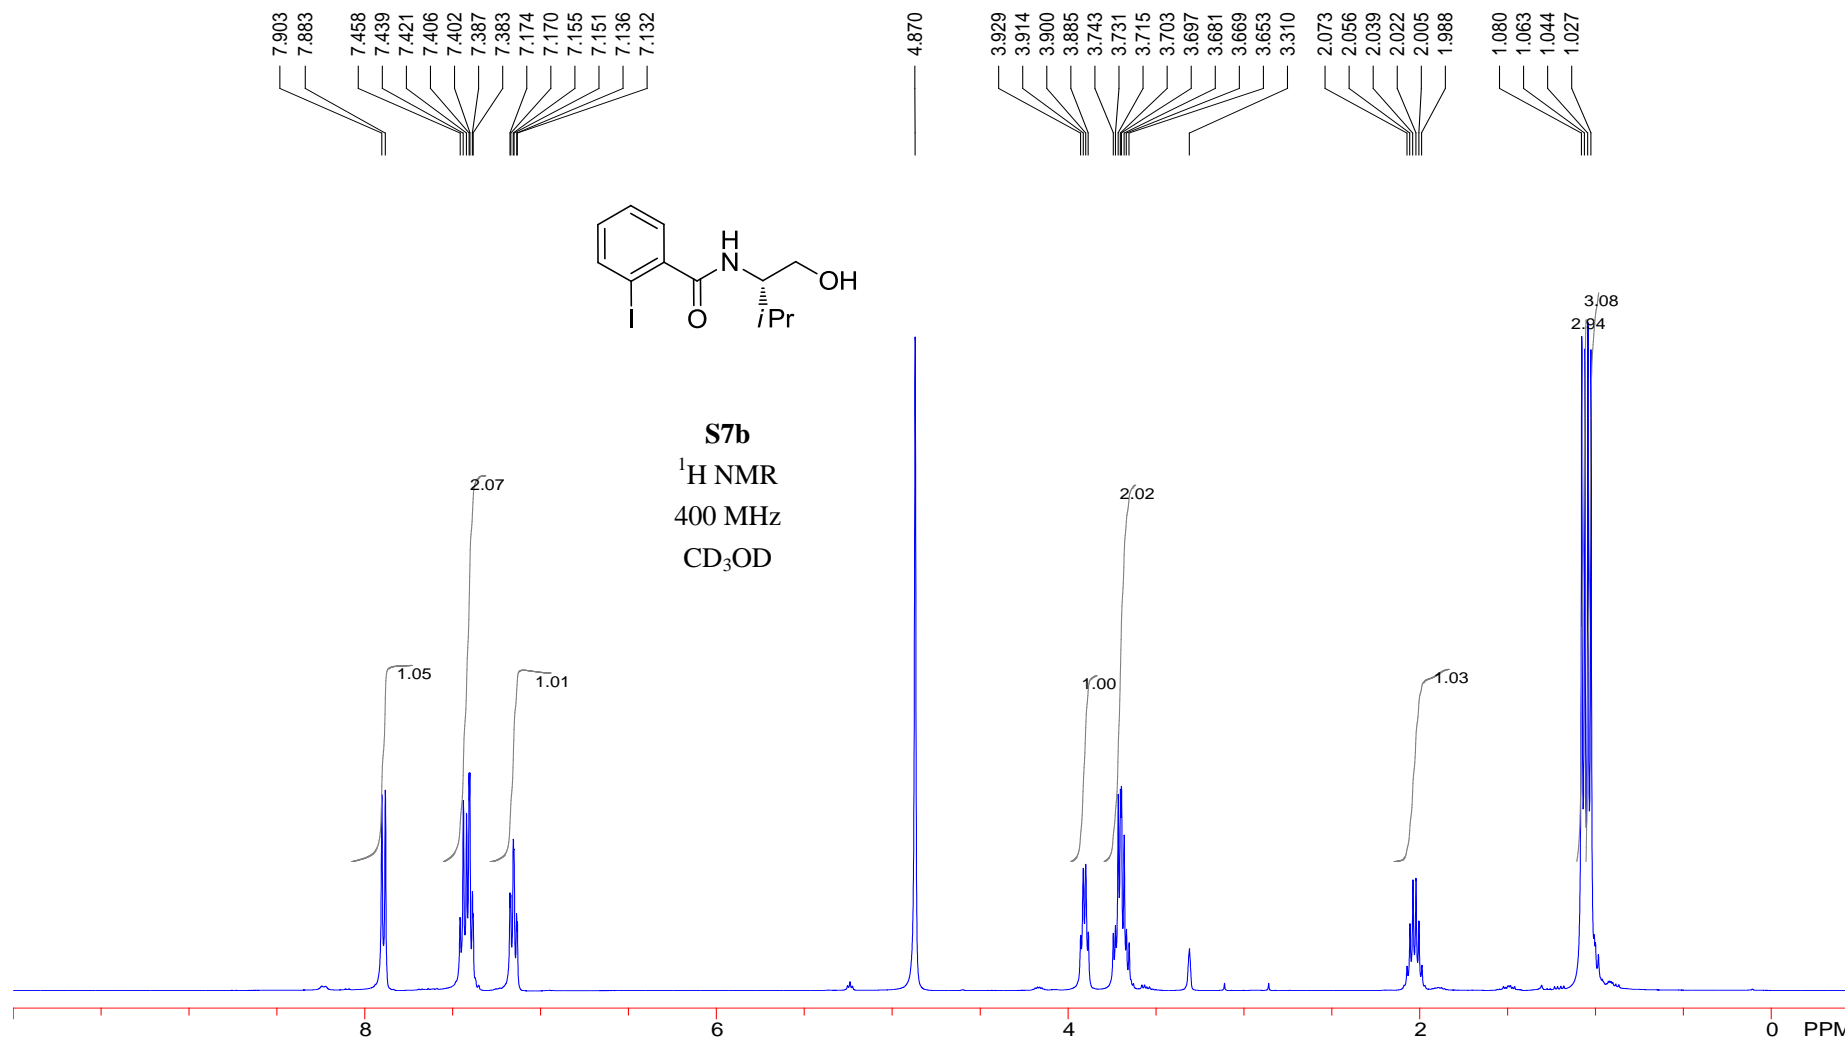

Supplementary Figure 23. <sup>1</sup>H NMR spectrum for **s7b**



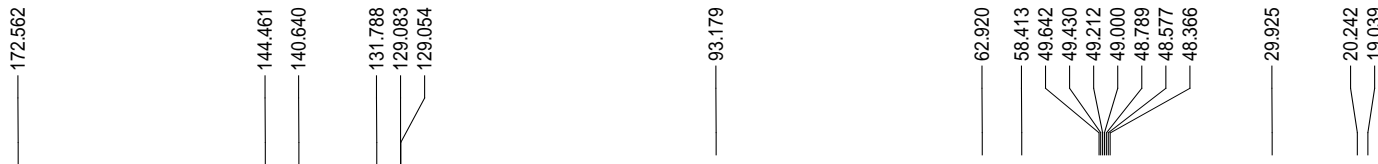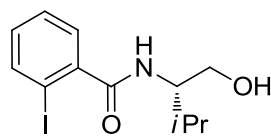

**S7b**

$^{13}\text{C}$  NMR

101 MHz

$\text{CD}_3\text{OD}$

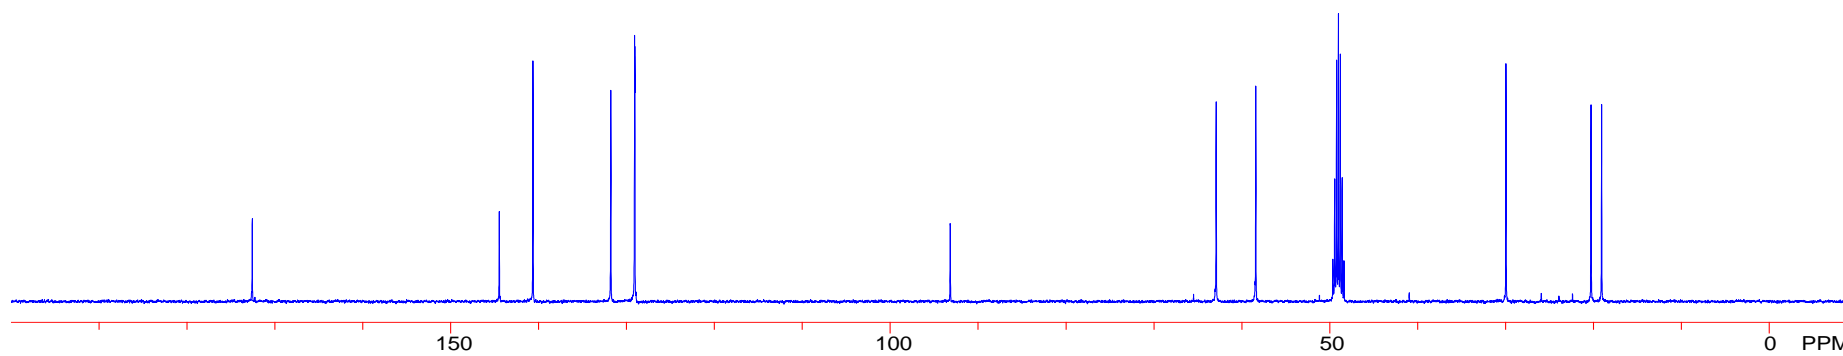

**Supplementary Figure 24.**  $^{13}\text{C}$  NMR spectrum for **s7b**

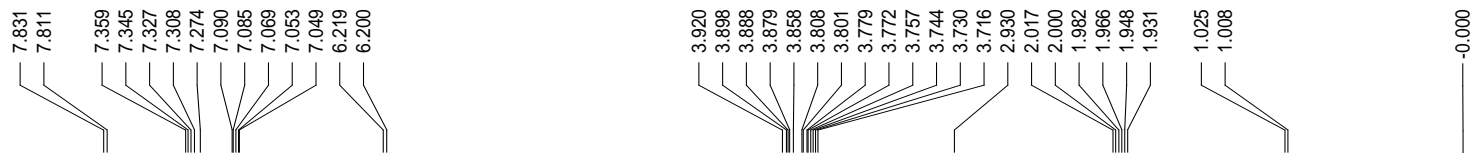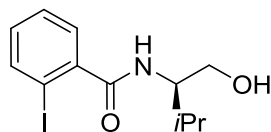

**ent-S7b**

<sup>1</sup>H NMR

400 MHz

CDCl<sub>3</sub>

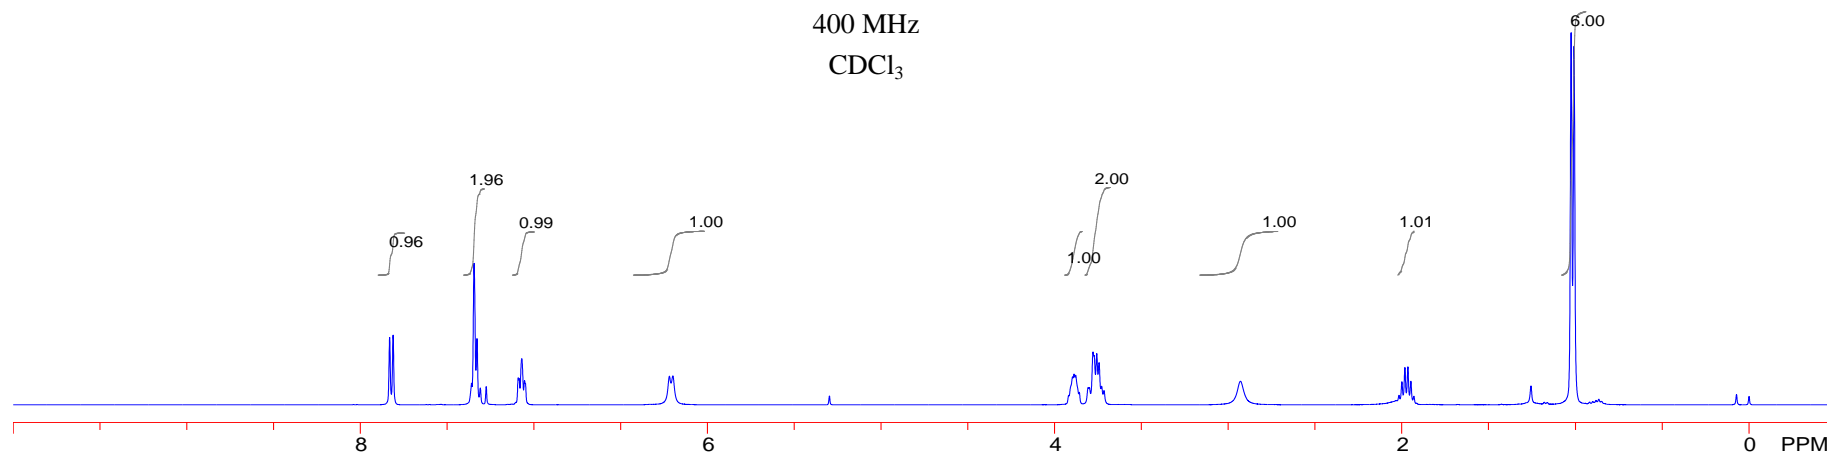

**Supplementary Figure 25.** <sup>1</sup>H NMR spectrum for **ent-S7b**

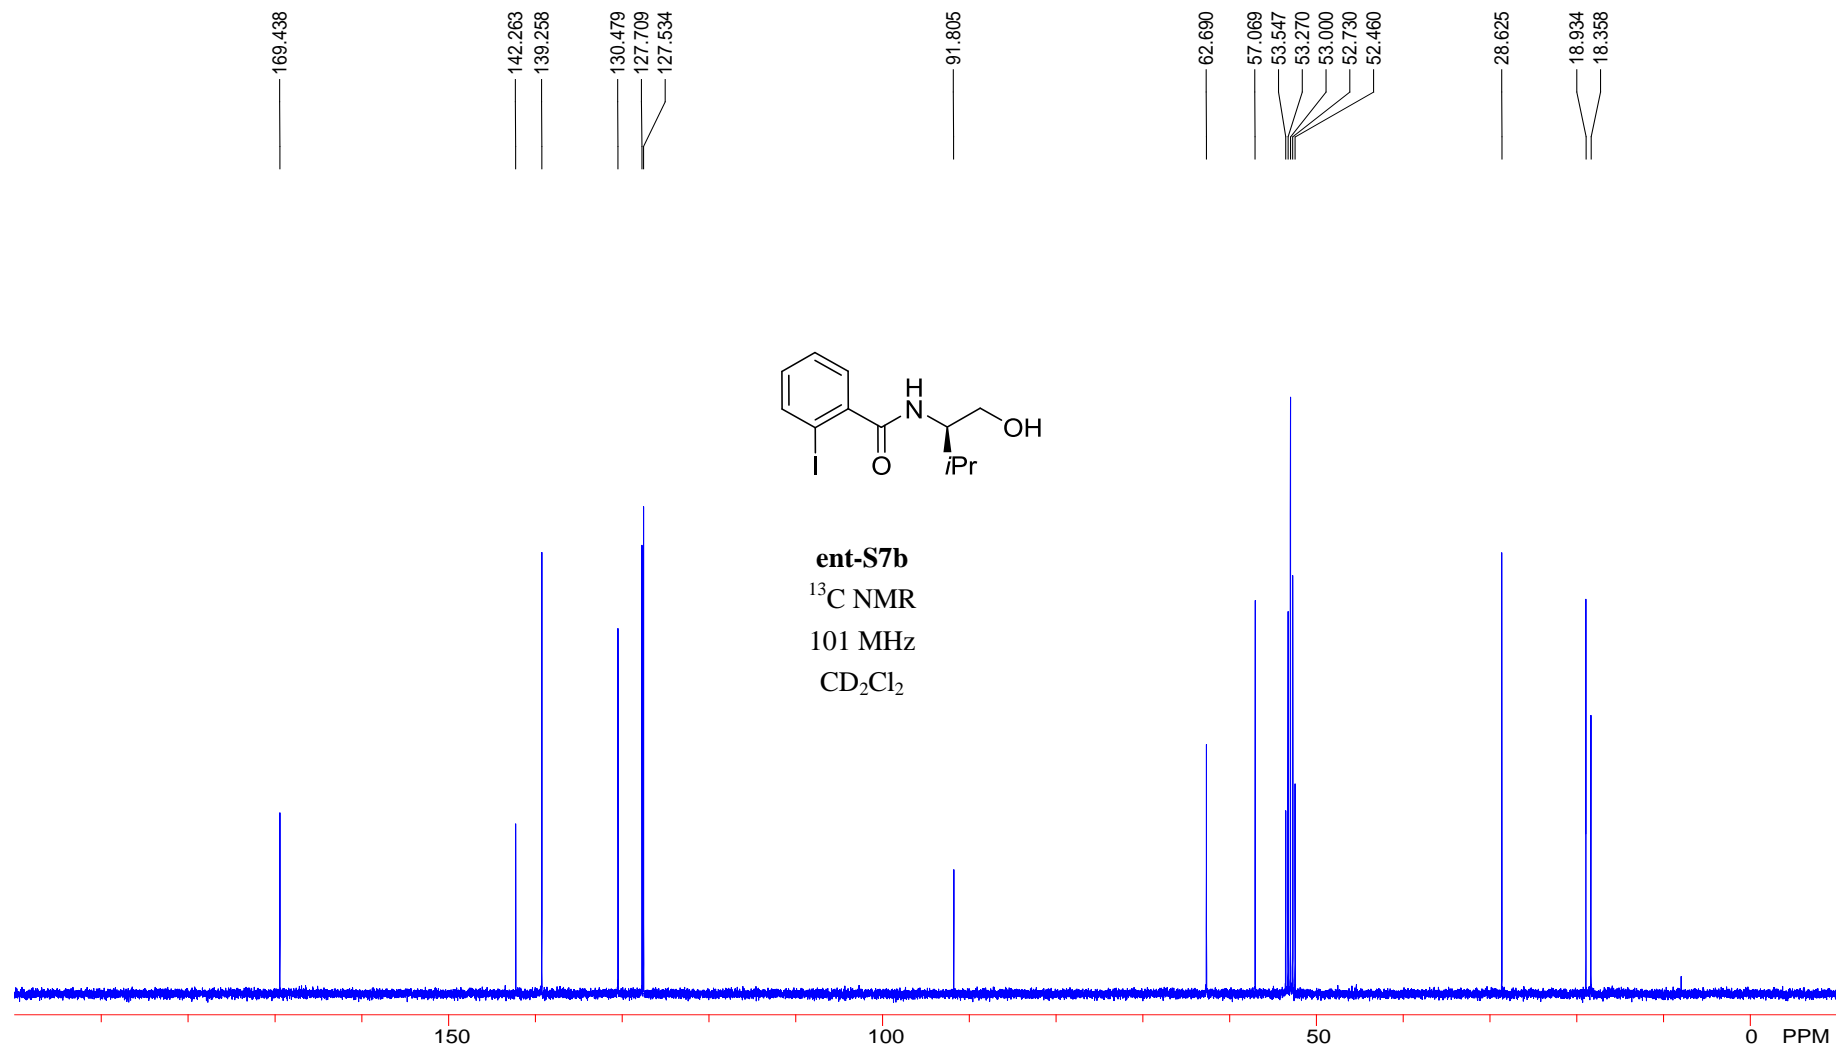

Supplementary Figure 26. <sup>13</sup>C NMR spectrum for ent-s7b

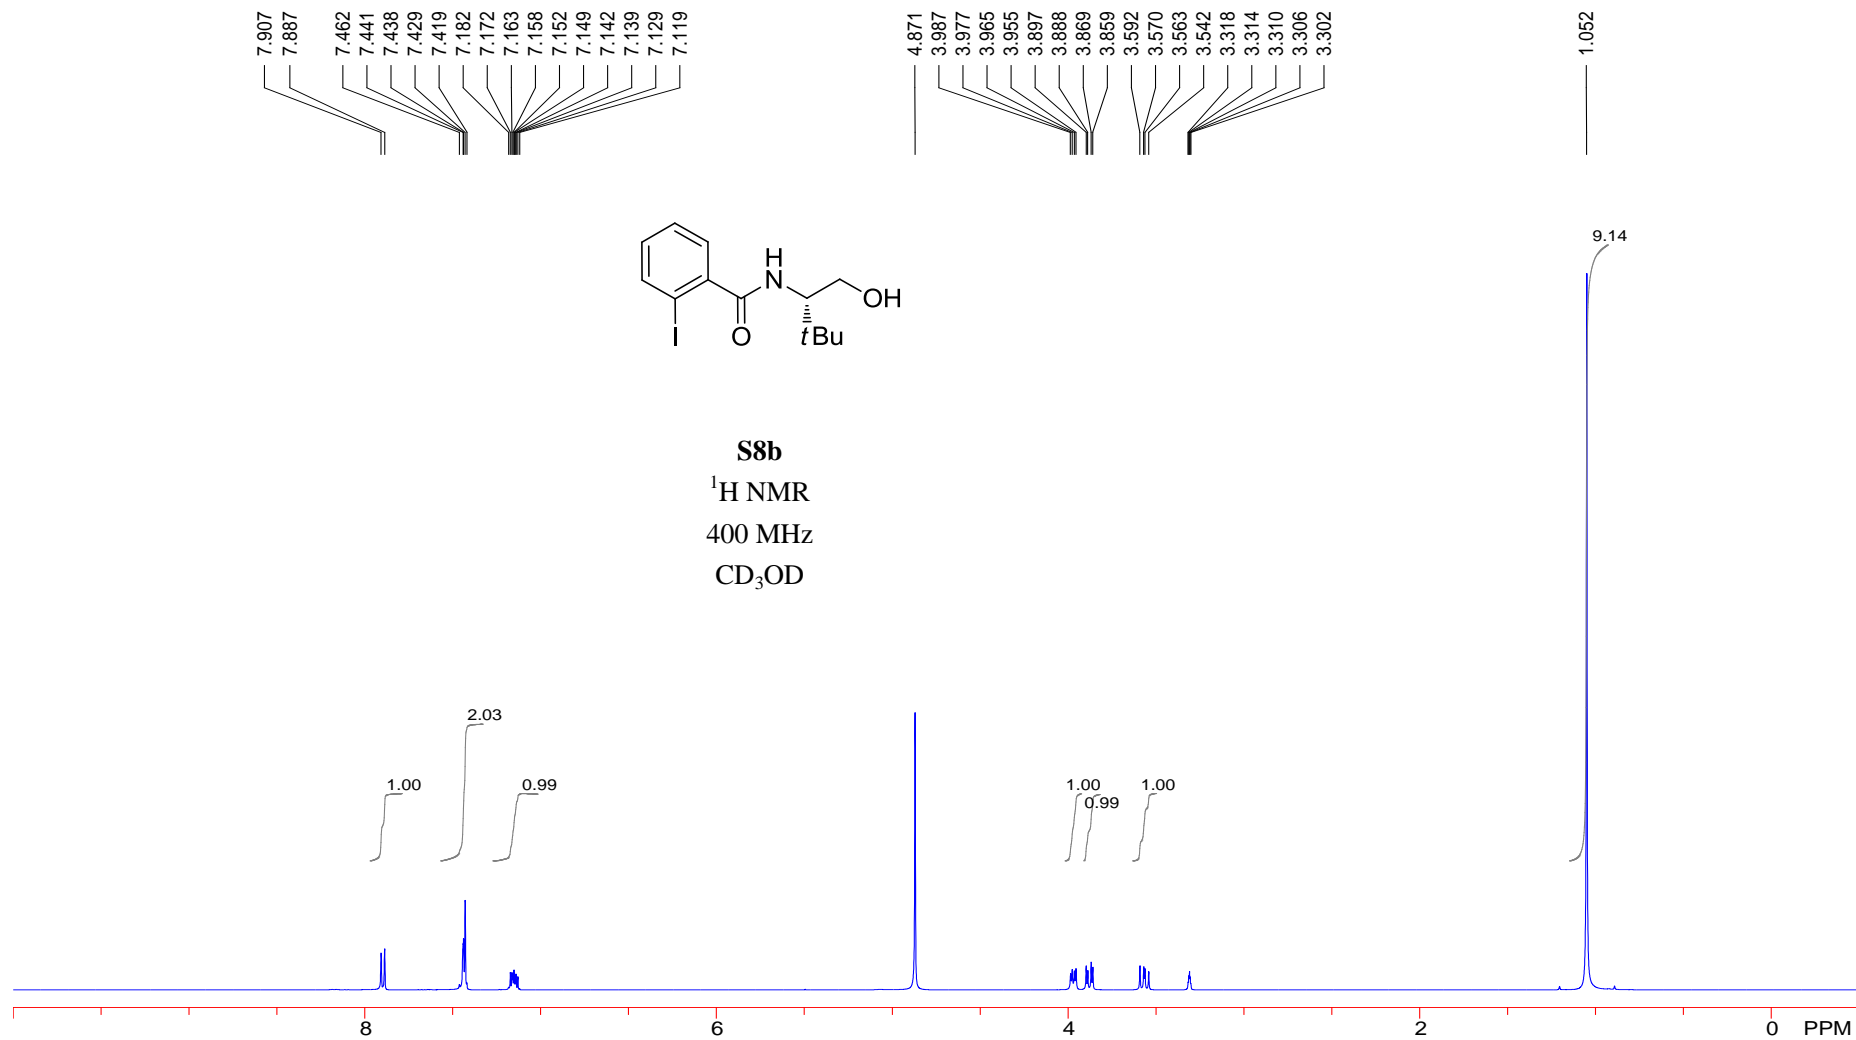

Supplementary Figure 27. <sup>1</sup>H NMR spectrum for S8b

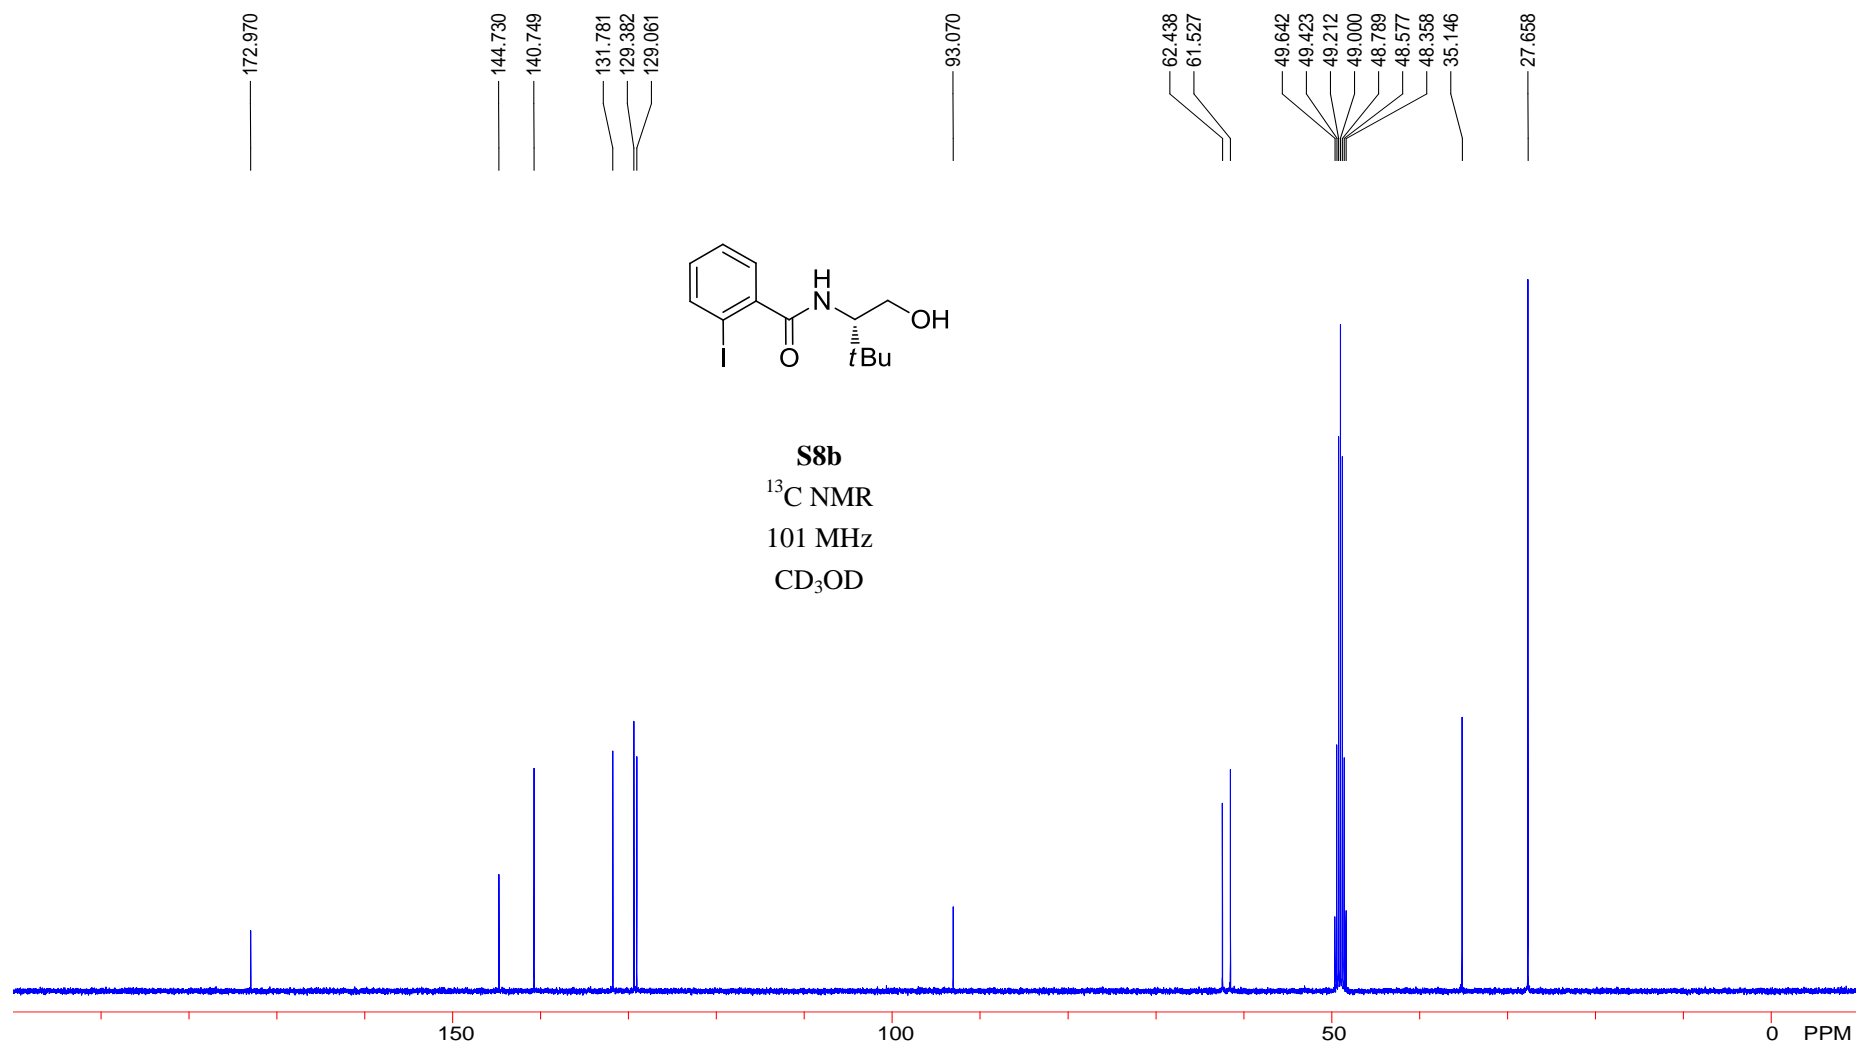

**Supplementary Figure 28.** <sup>13</sup>C NMR spectrum for **S8b**

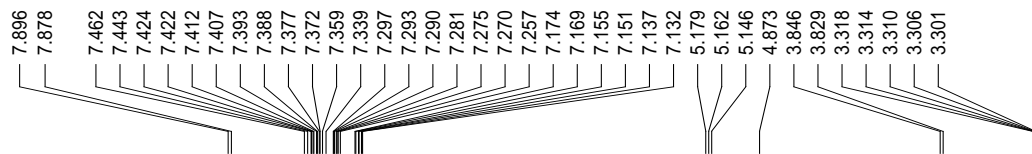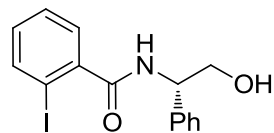

**S9b**  
<sup>1</sup>H NMR  
 400 MHz  
 CD<sub>3</sub>OD

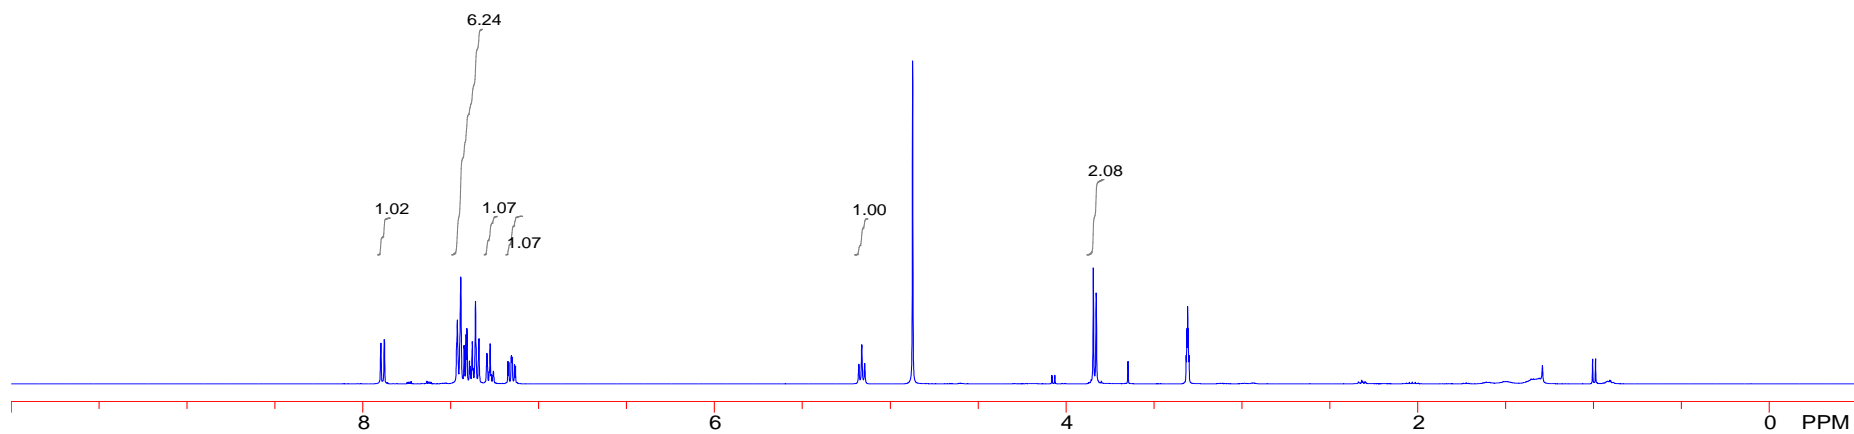

**Supplementary Figure 29.** <sup>1</sup>H NMR spectrum for **S9b**

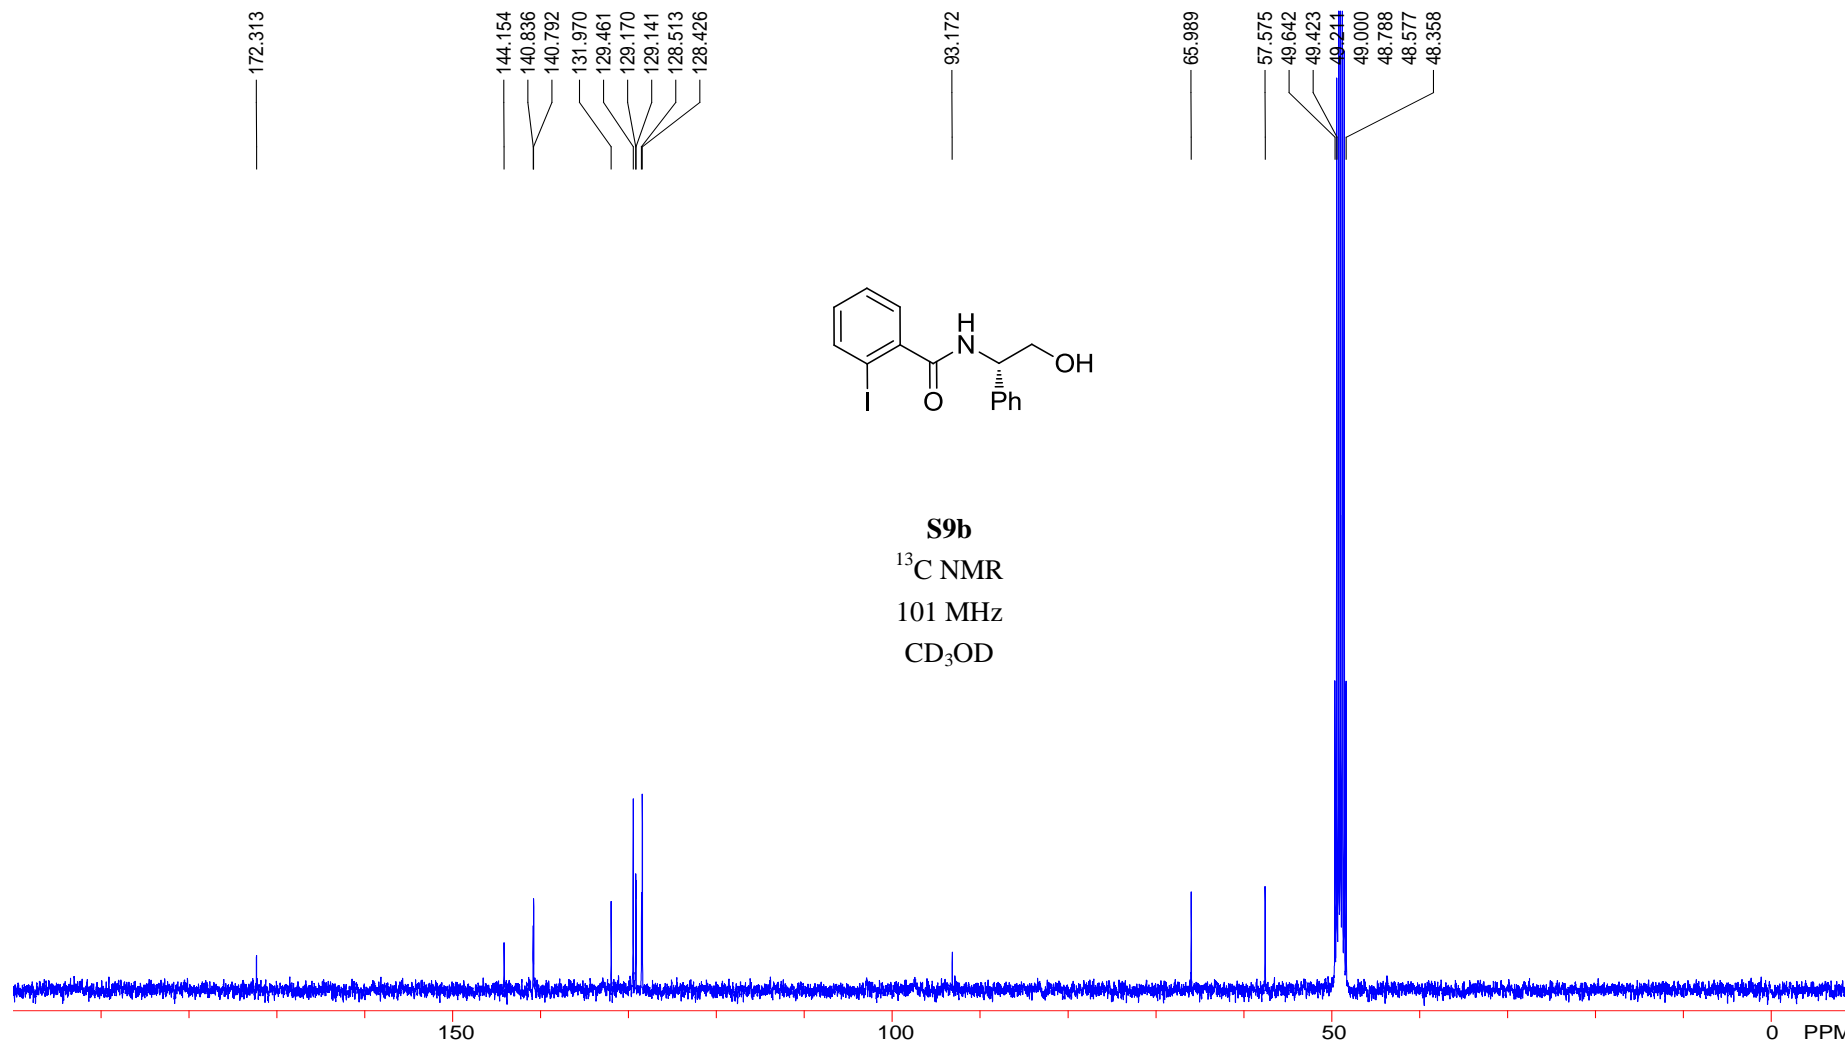

Supplementary Figure 30. <sup>13</sup>C NMR spectrum for S9b

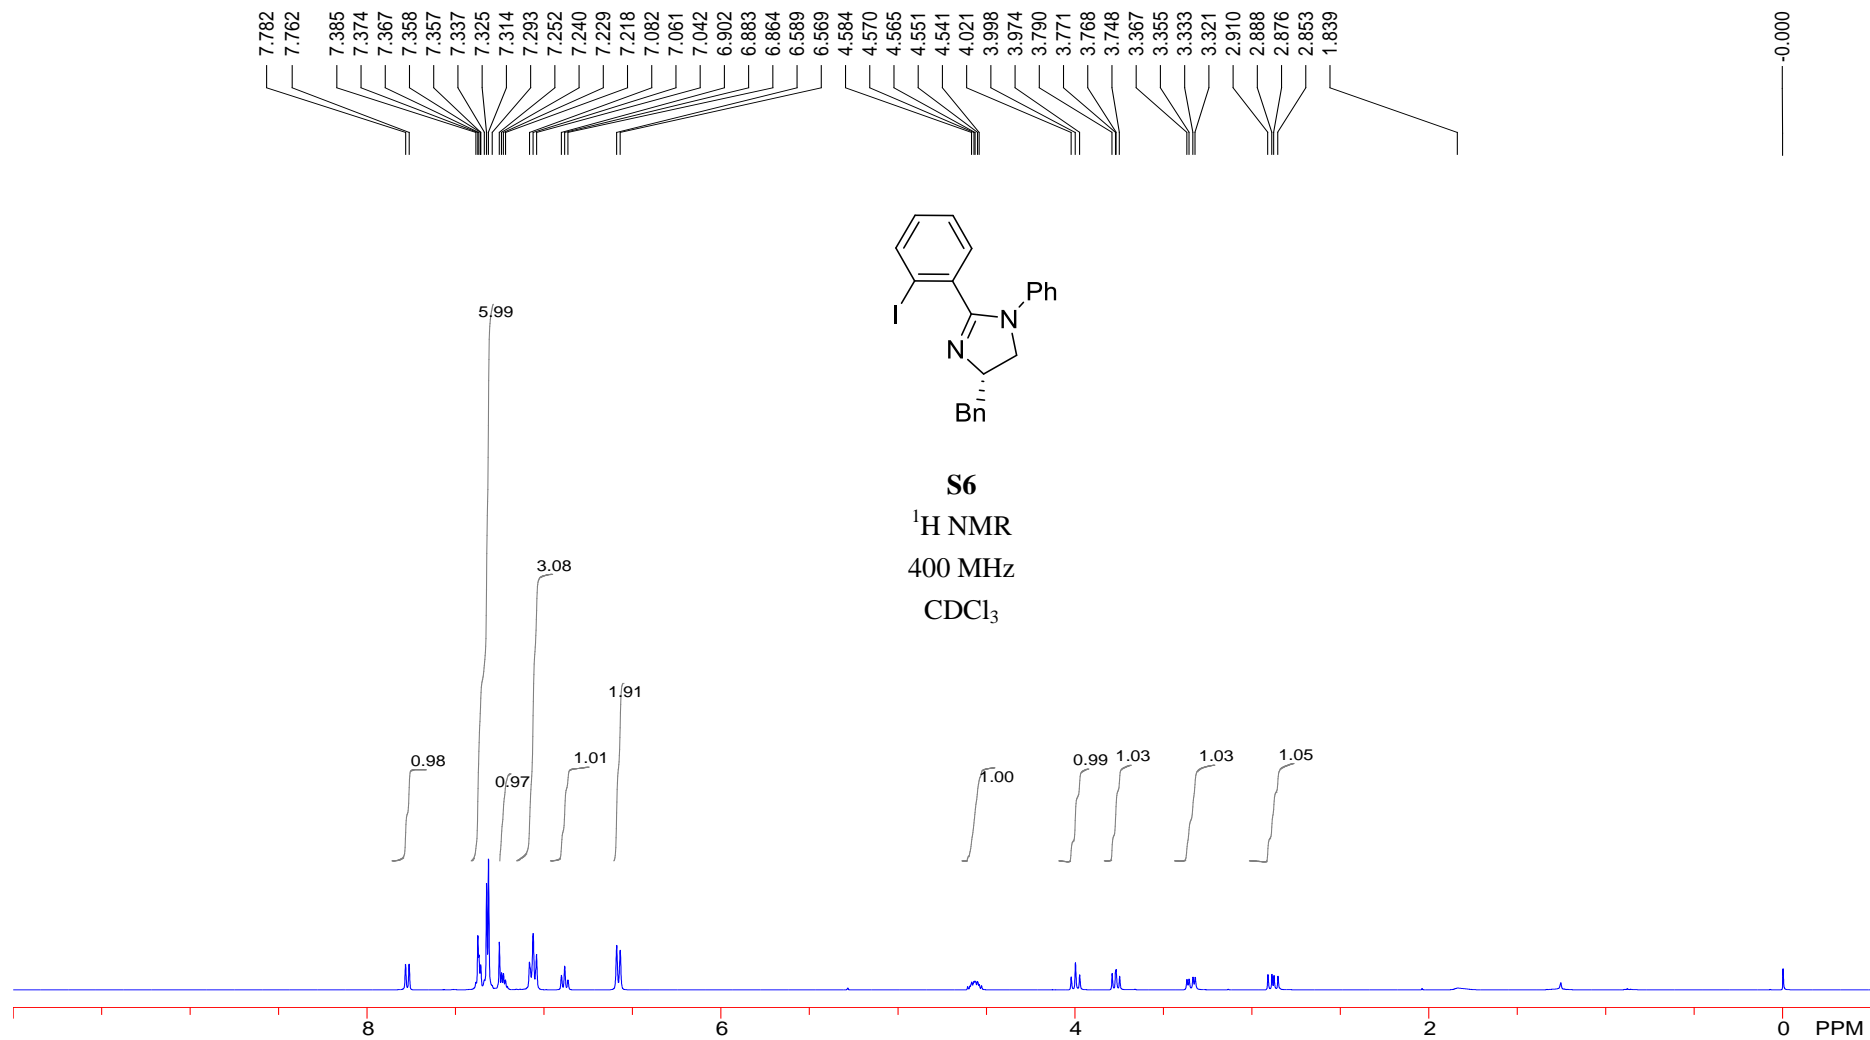

Supplementary Figure 31. <sup>1</sup>H NMR spectrum for S6



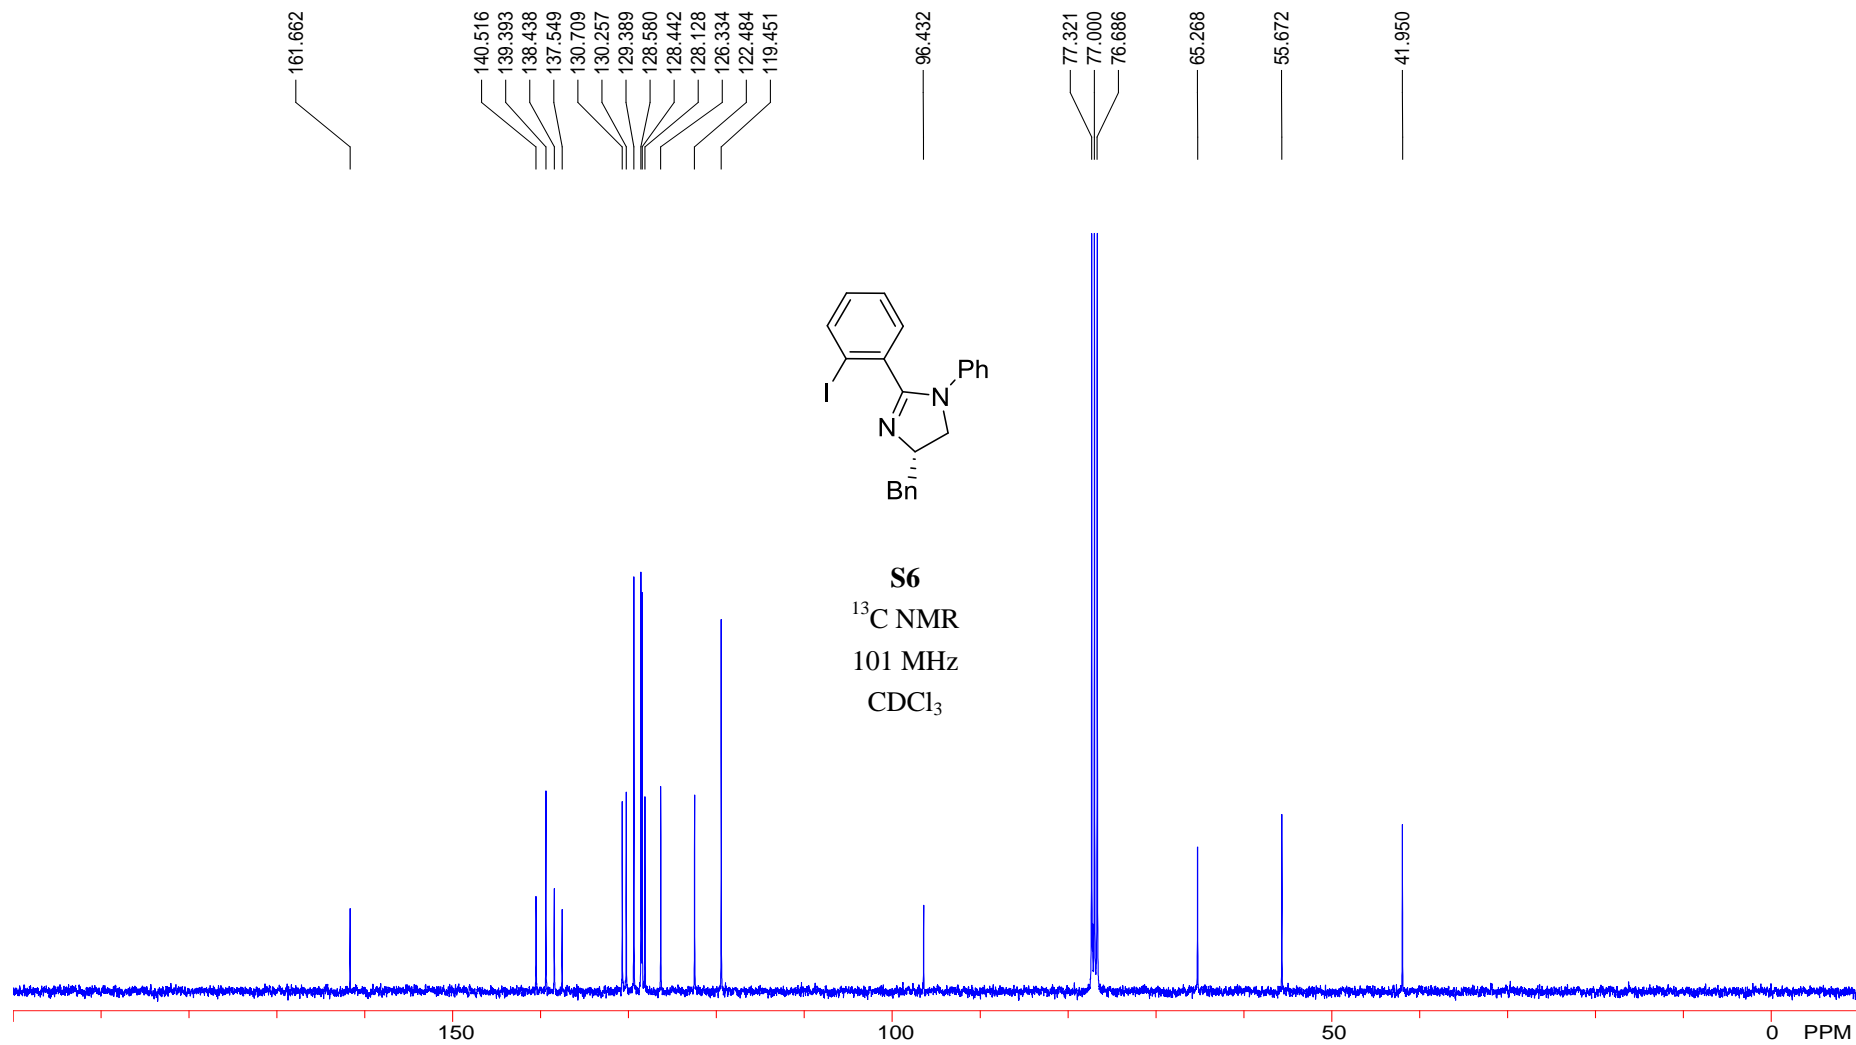

Supplementary Figure 32.  $^{13}\text{C}$  NMR spectrum for S6

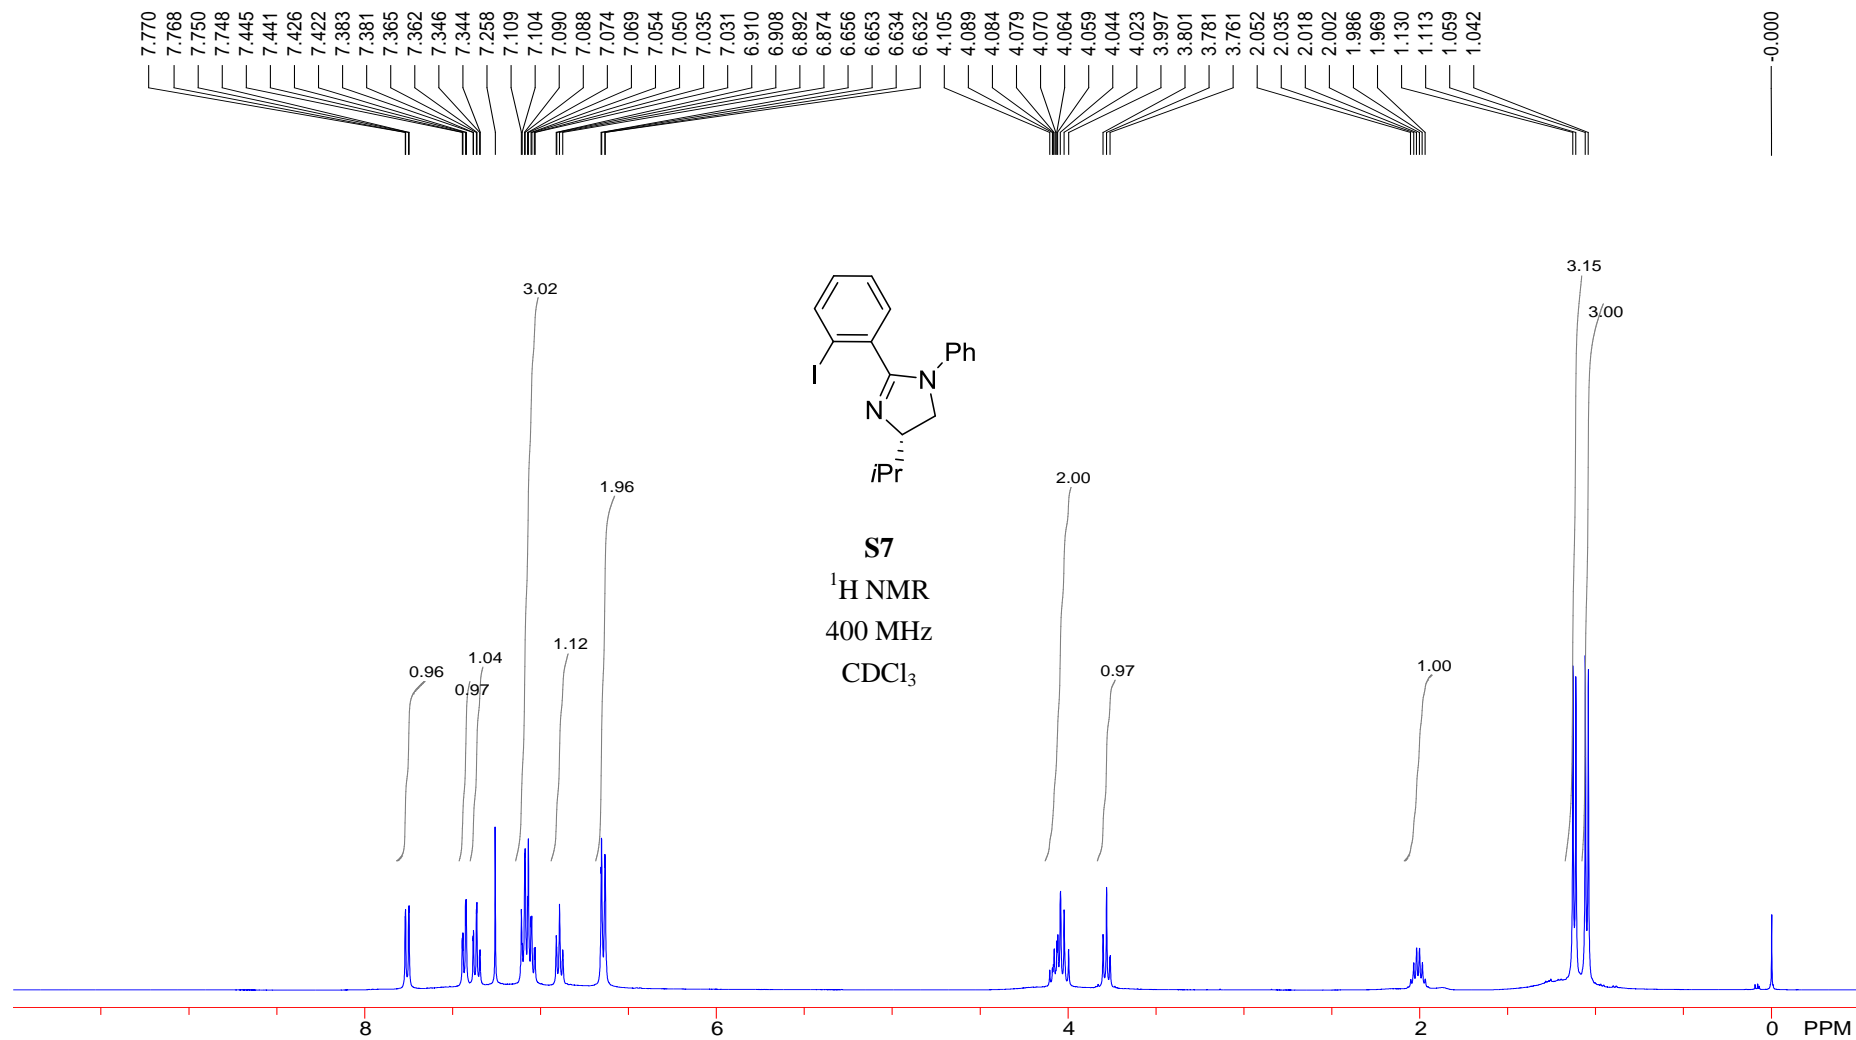

Supplementary Figure 33. <sup>1</sup>H NMR spectrum for **S7**

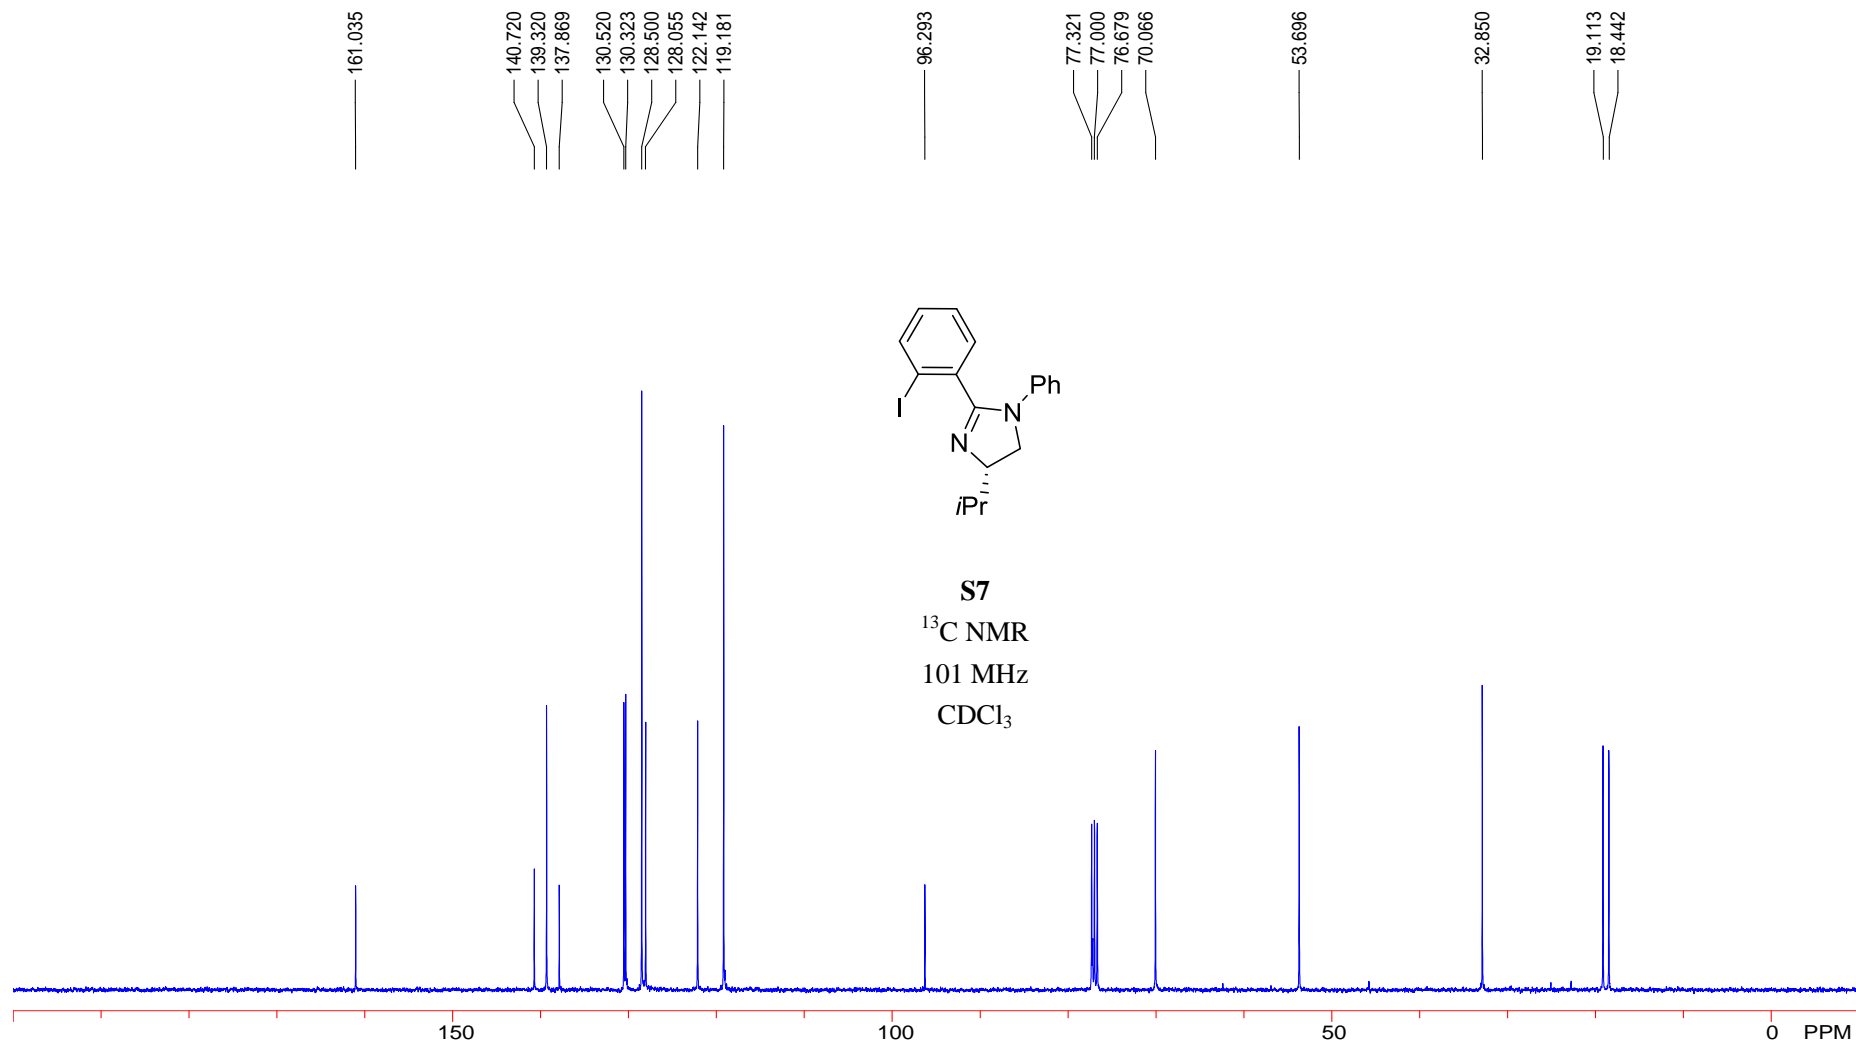

Supplementary Figure 34. <sup>13</sup>C NMR spectrum for **S7**

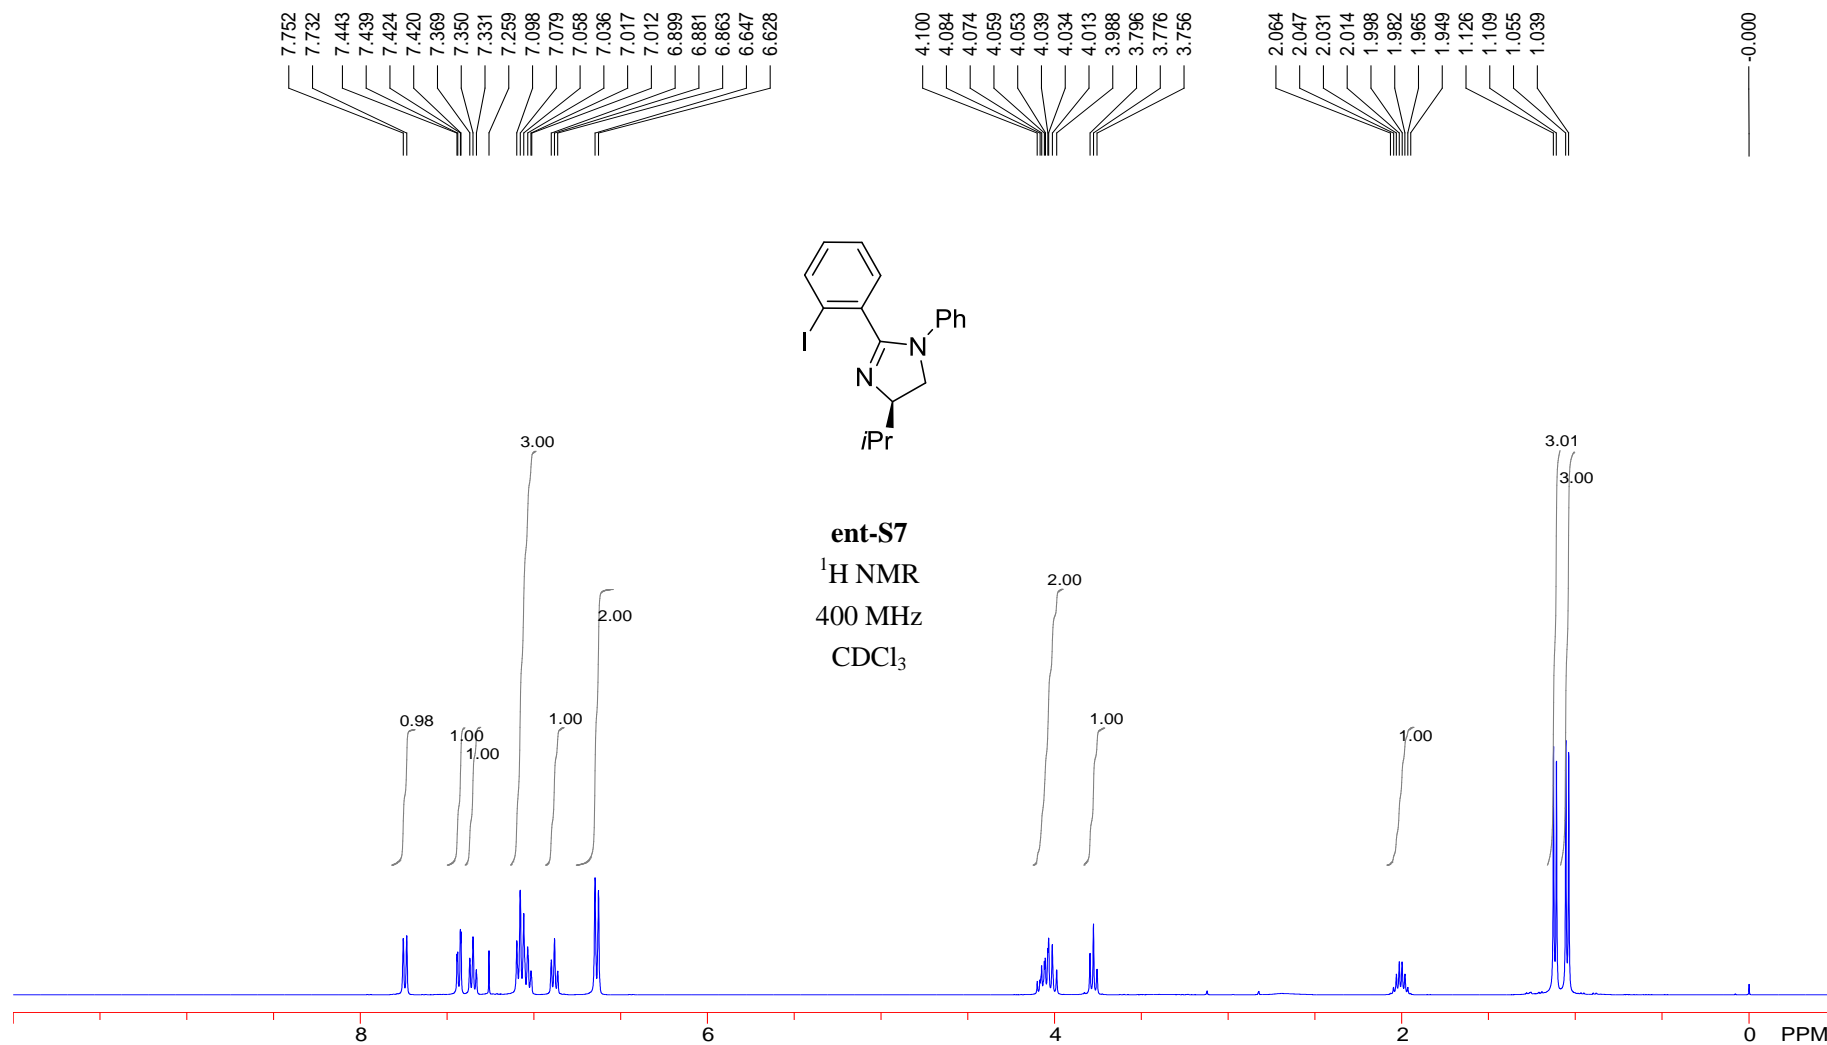

Supplementary Figure 35. <sup>1</sup>H NMR spectrum for **ent-S7**

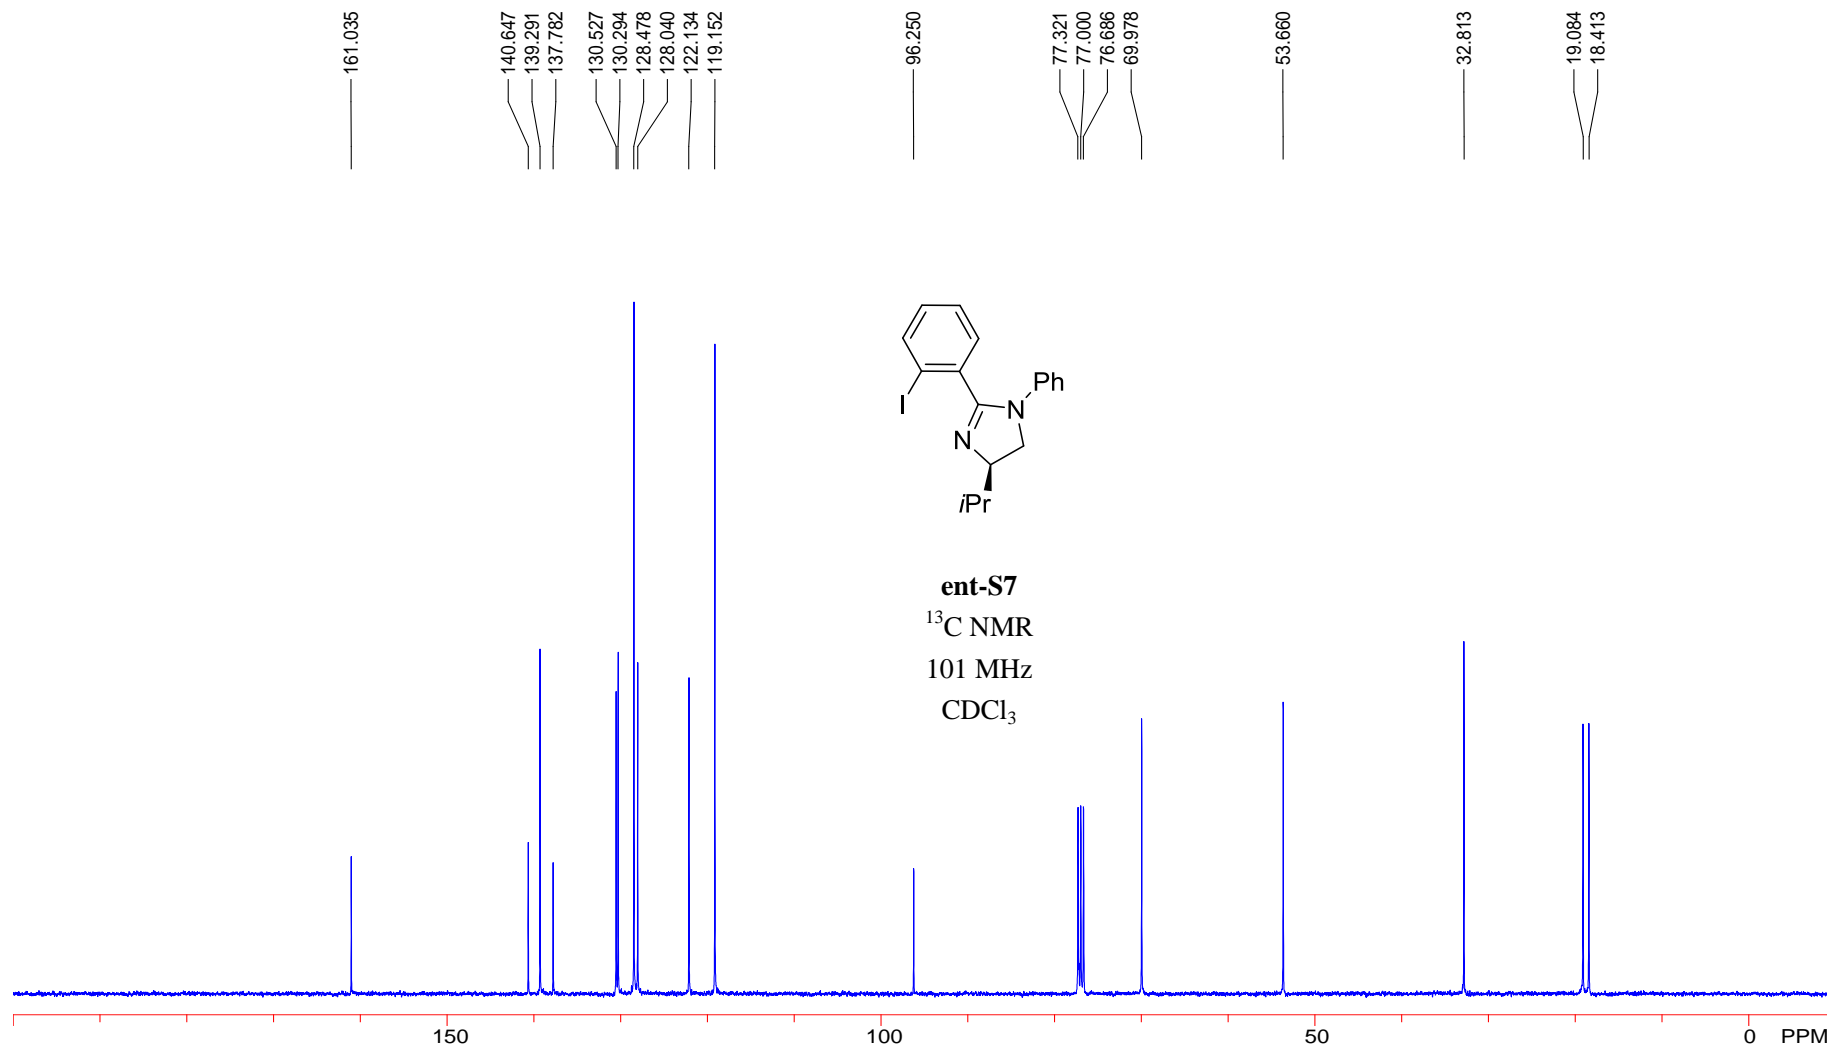

**Supplementary Figure 36.**  $^{13}\text{C}$  NMR spectrum for **ent-S7**

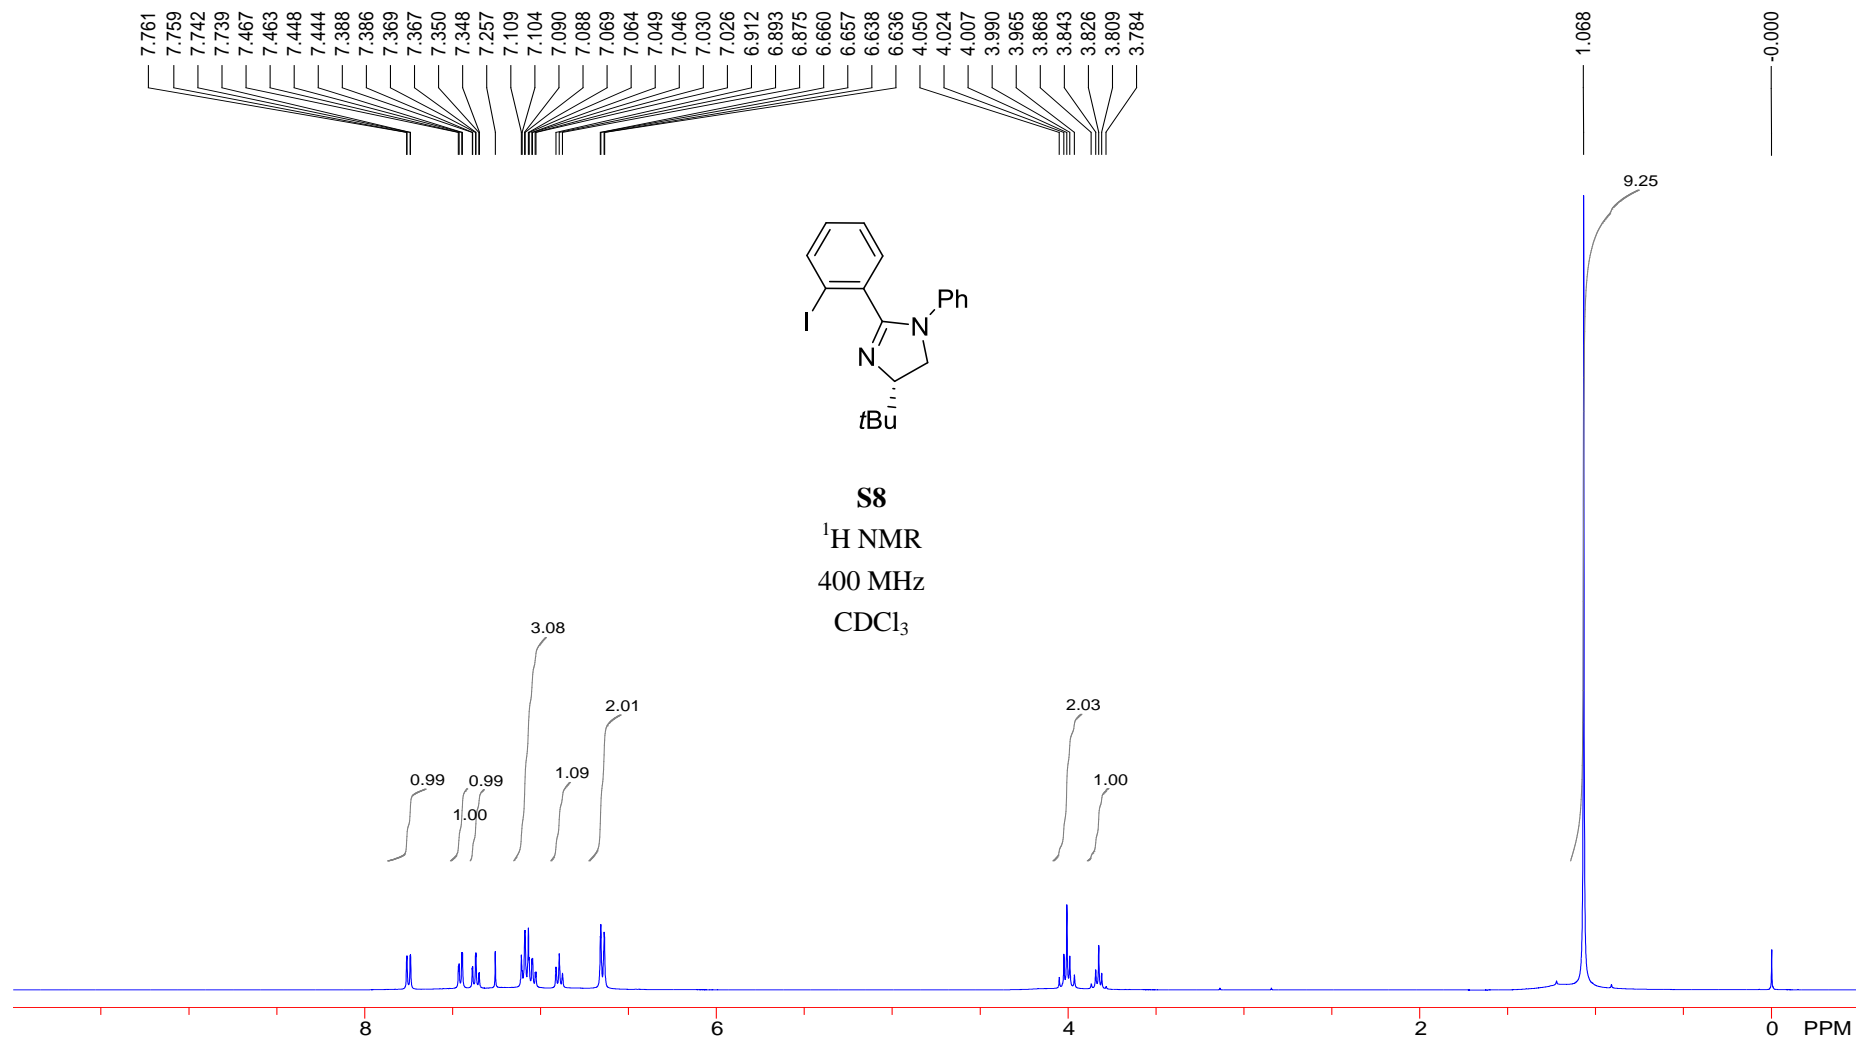

Supplementary Figure 37. <sup>1</sup>H NMR spectrum for **S8**

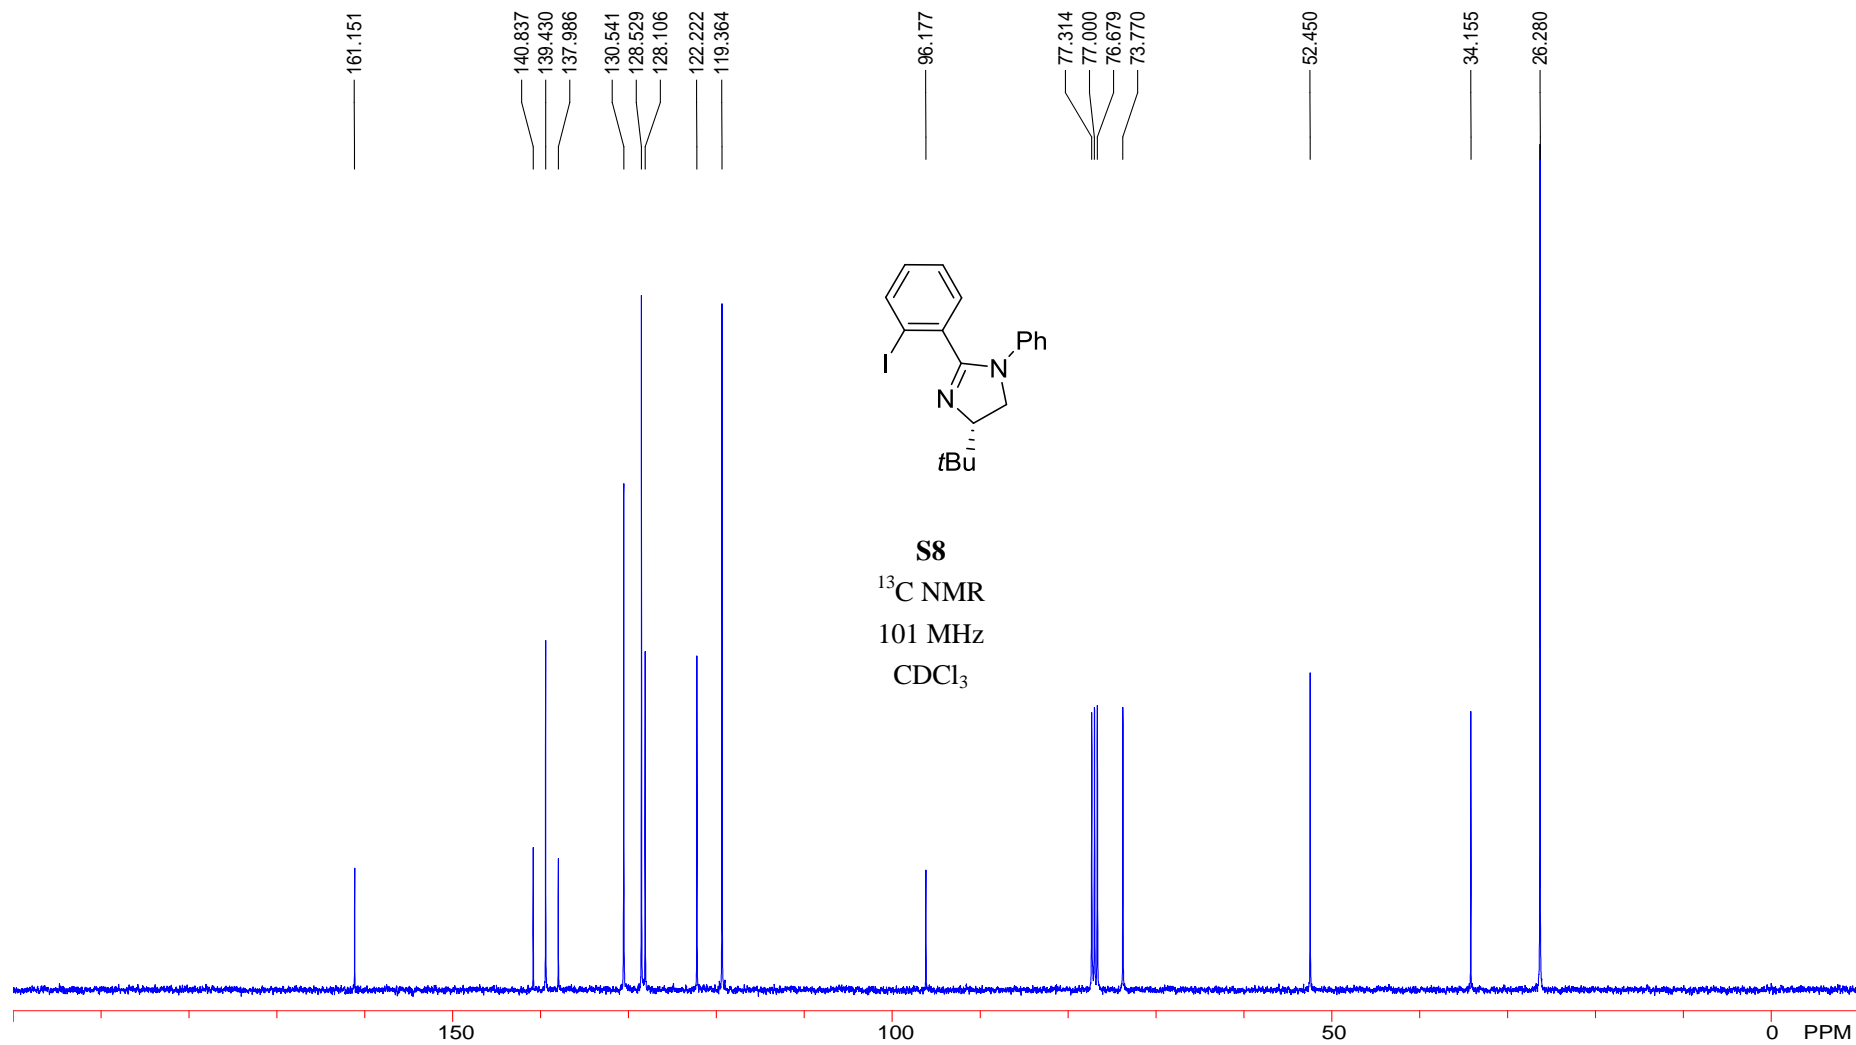

**Supplementary Figure 38.**  $^{13}\text{C}$  NMR spectrum for **S8**

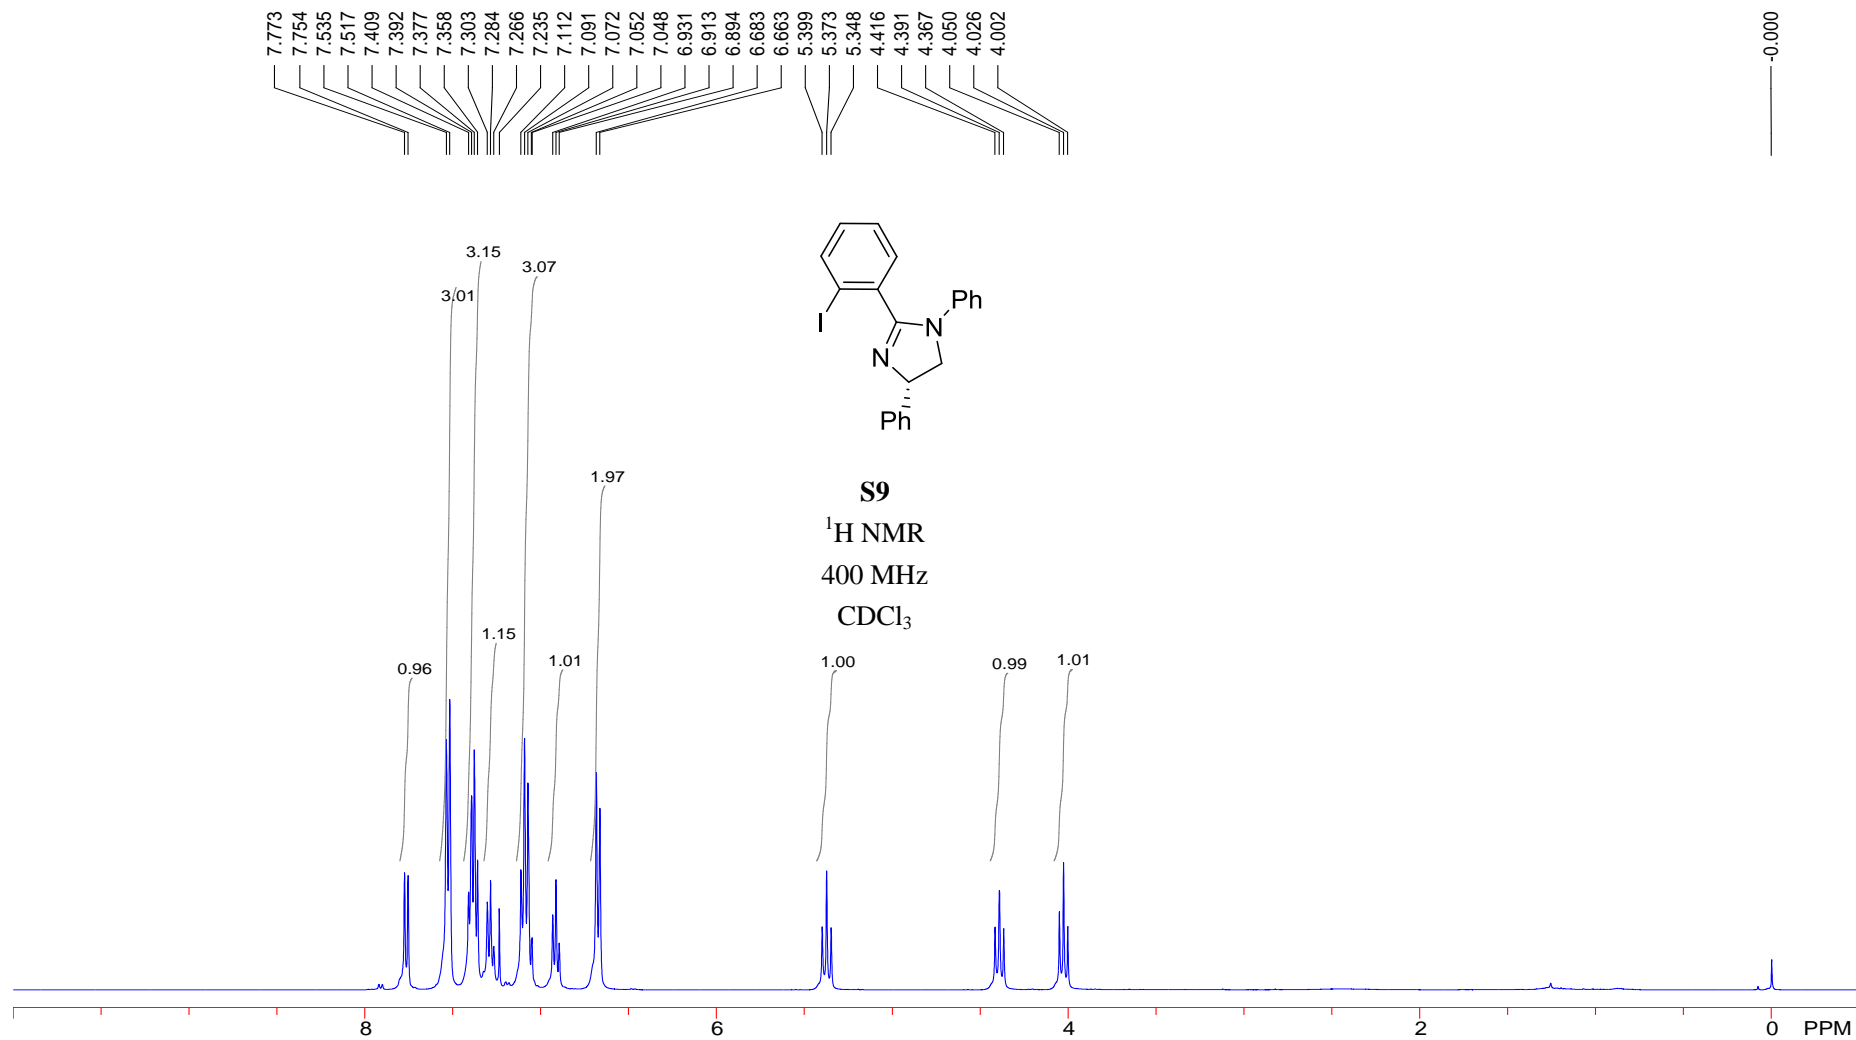

Supplementary Figure 39. <sup>1</sup>H NMR spectrum for **S9**



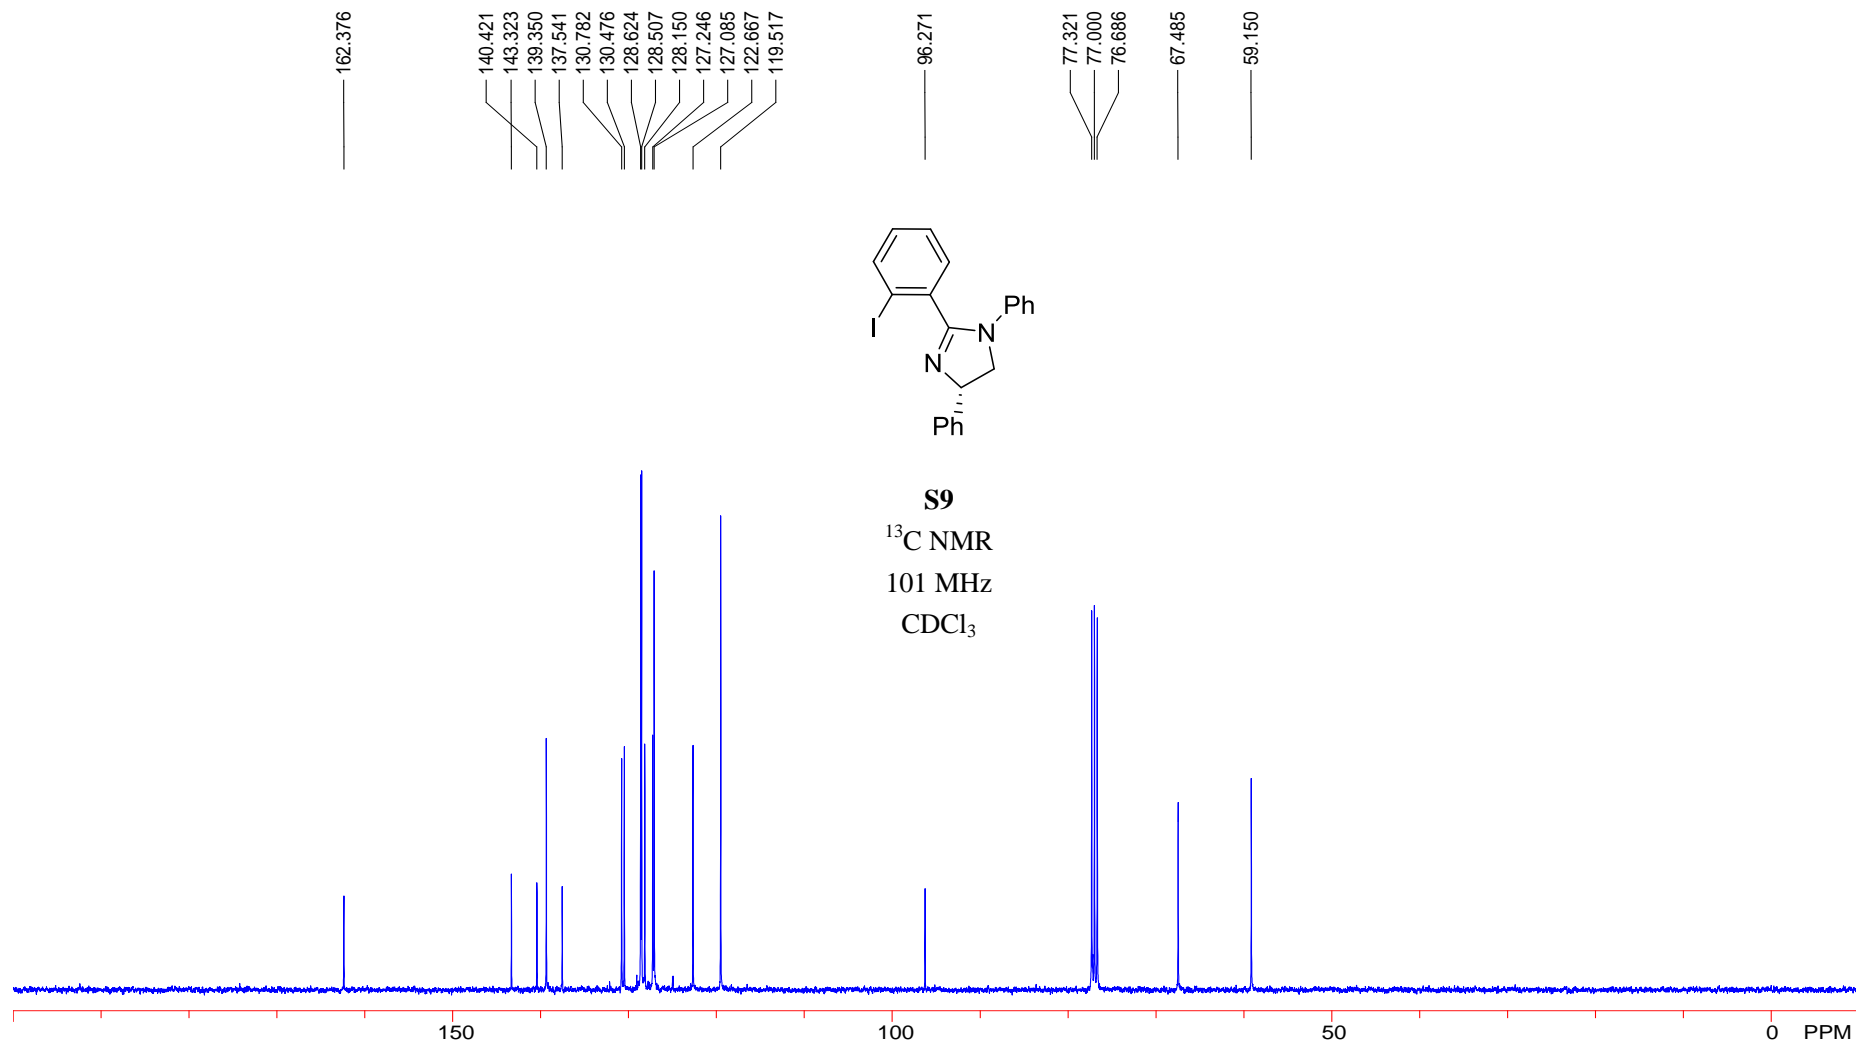

**Supplementary Figure 40.**  $^{13}\text{C}$  NMR spectrum for **S9**

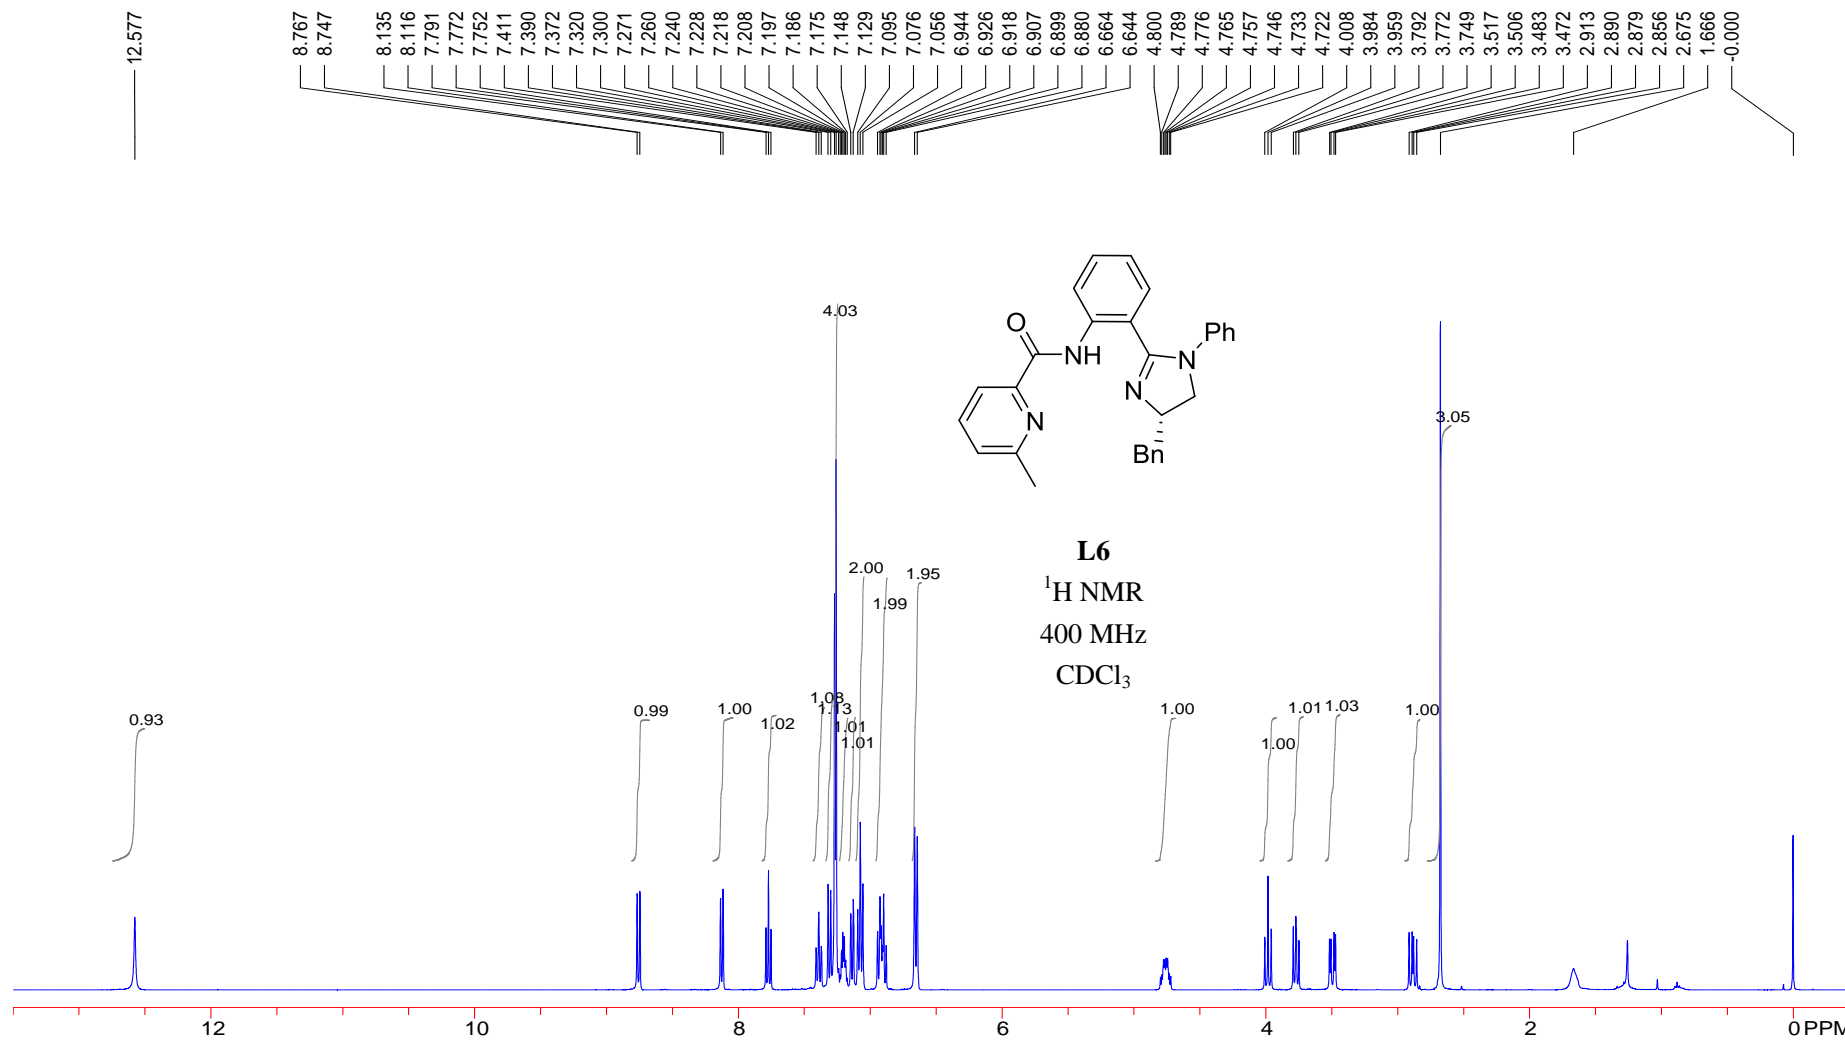

Supplementary Figure 41. <sup>1</sup>H NMR spectrum for L6

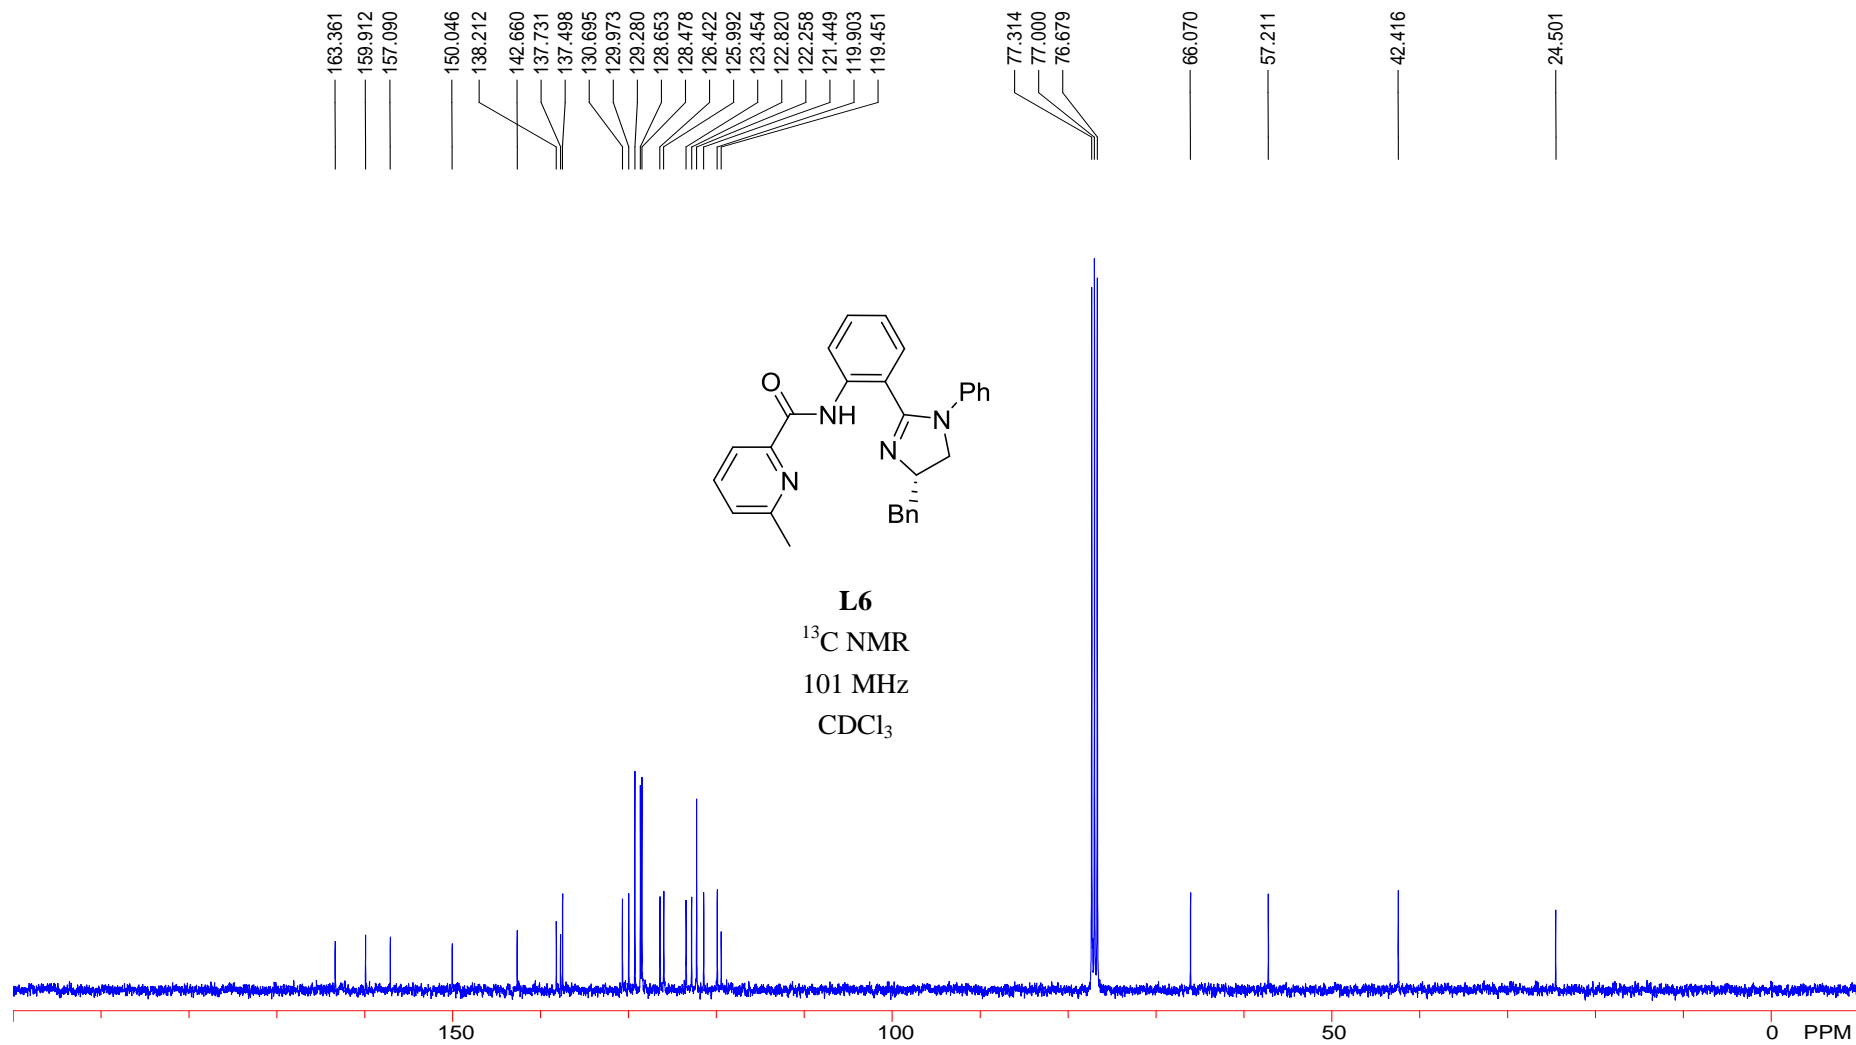

Supplementary Figure 42. <sup>13</sup>C NMR spectrum for L6

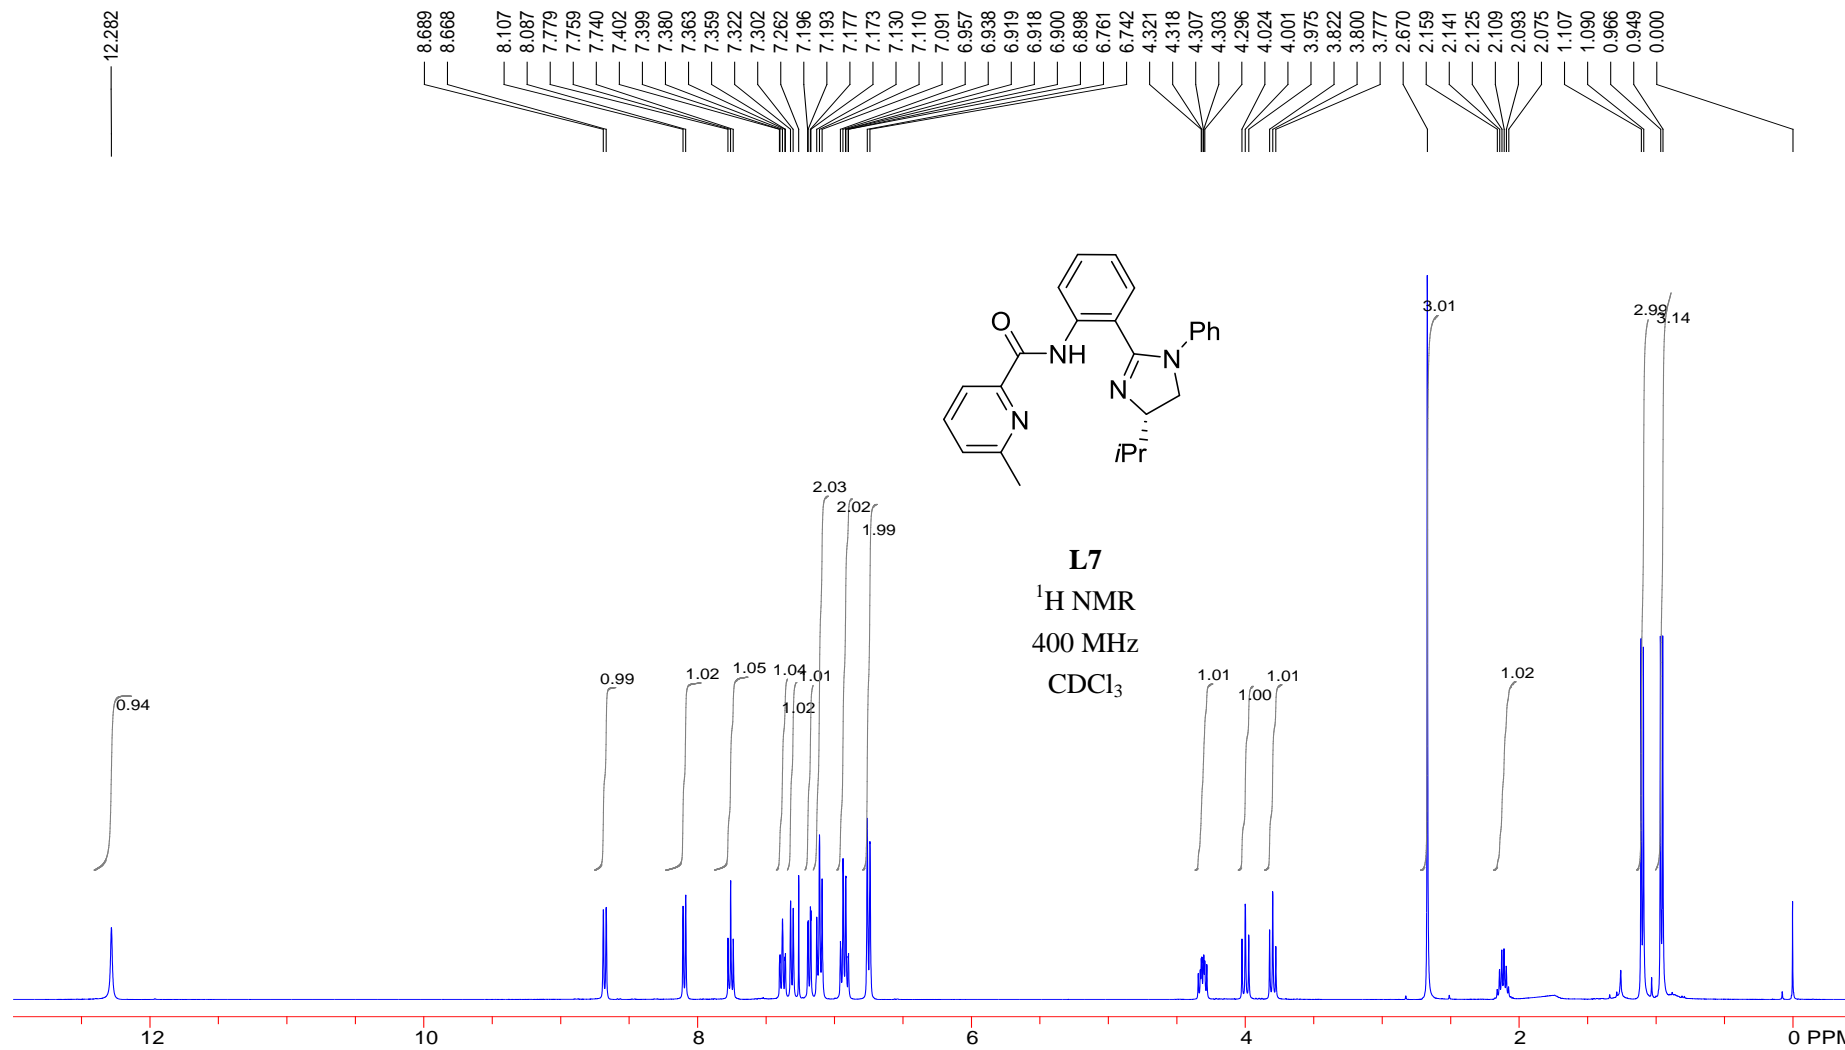

Supplementary Figure 43. <sup>1</sup>H NMR spectrum for L7

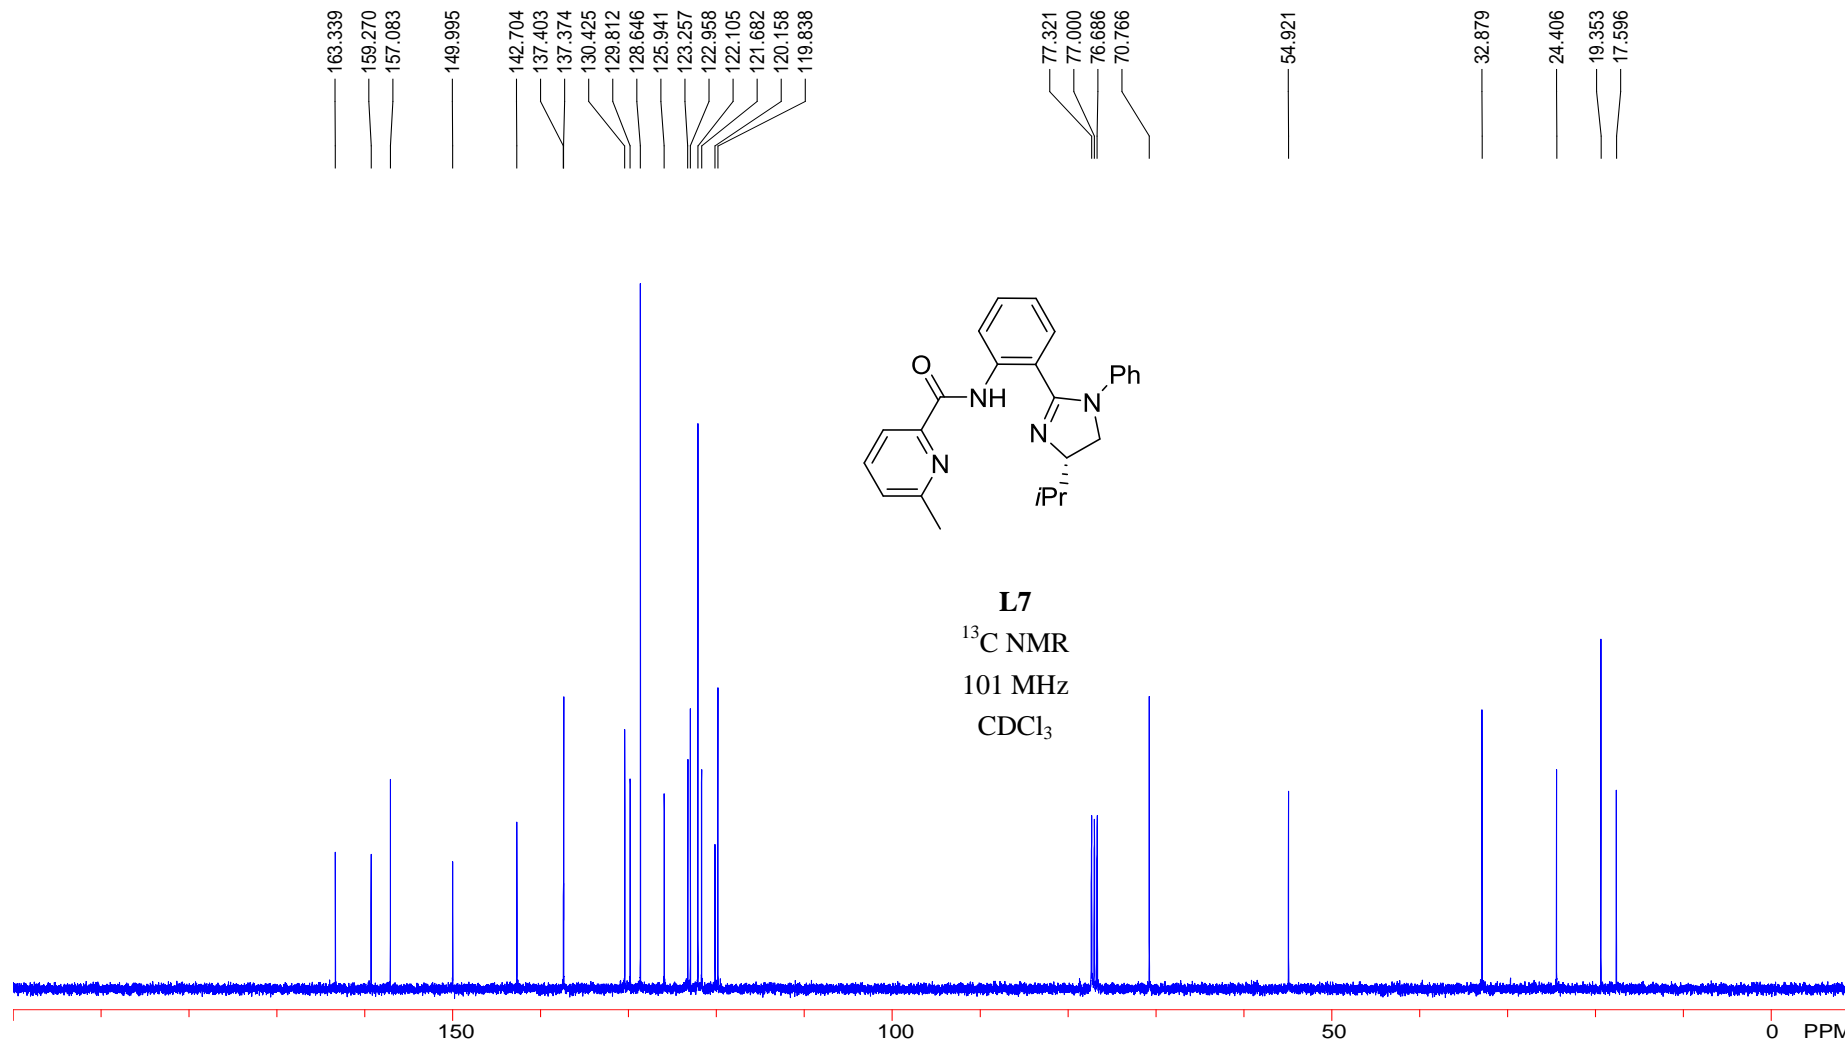

Supplementary Figure 44. <sup>13</sup>C NMR spectrum for L7

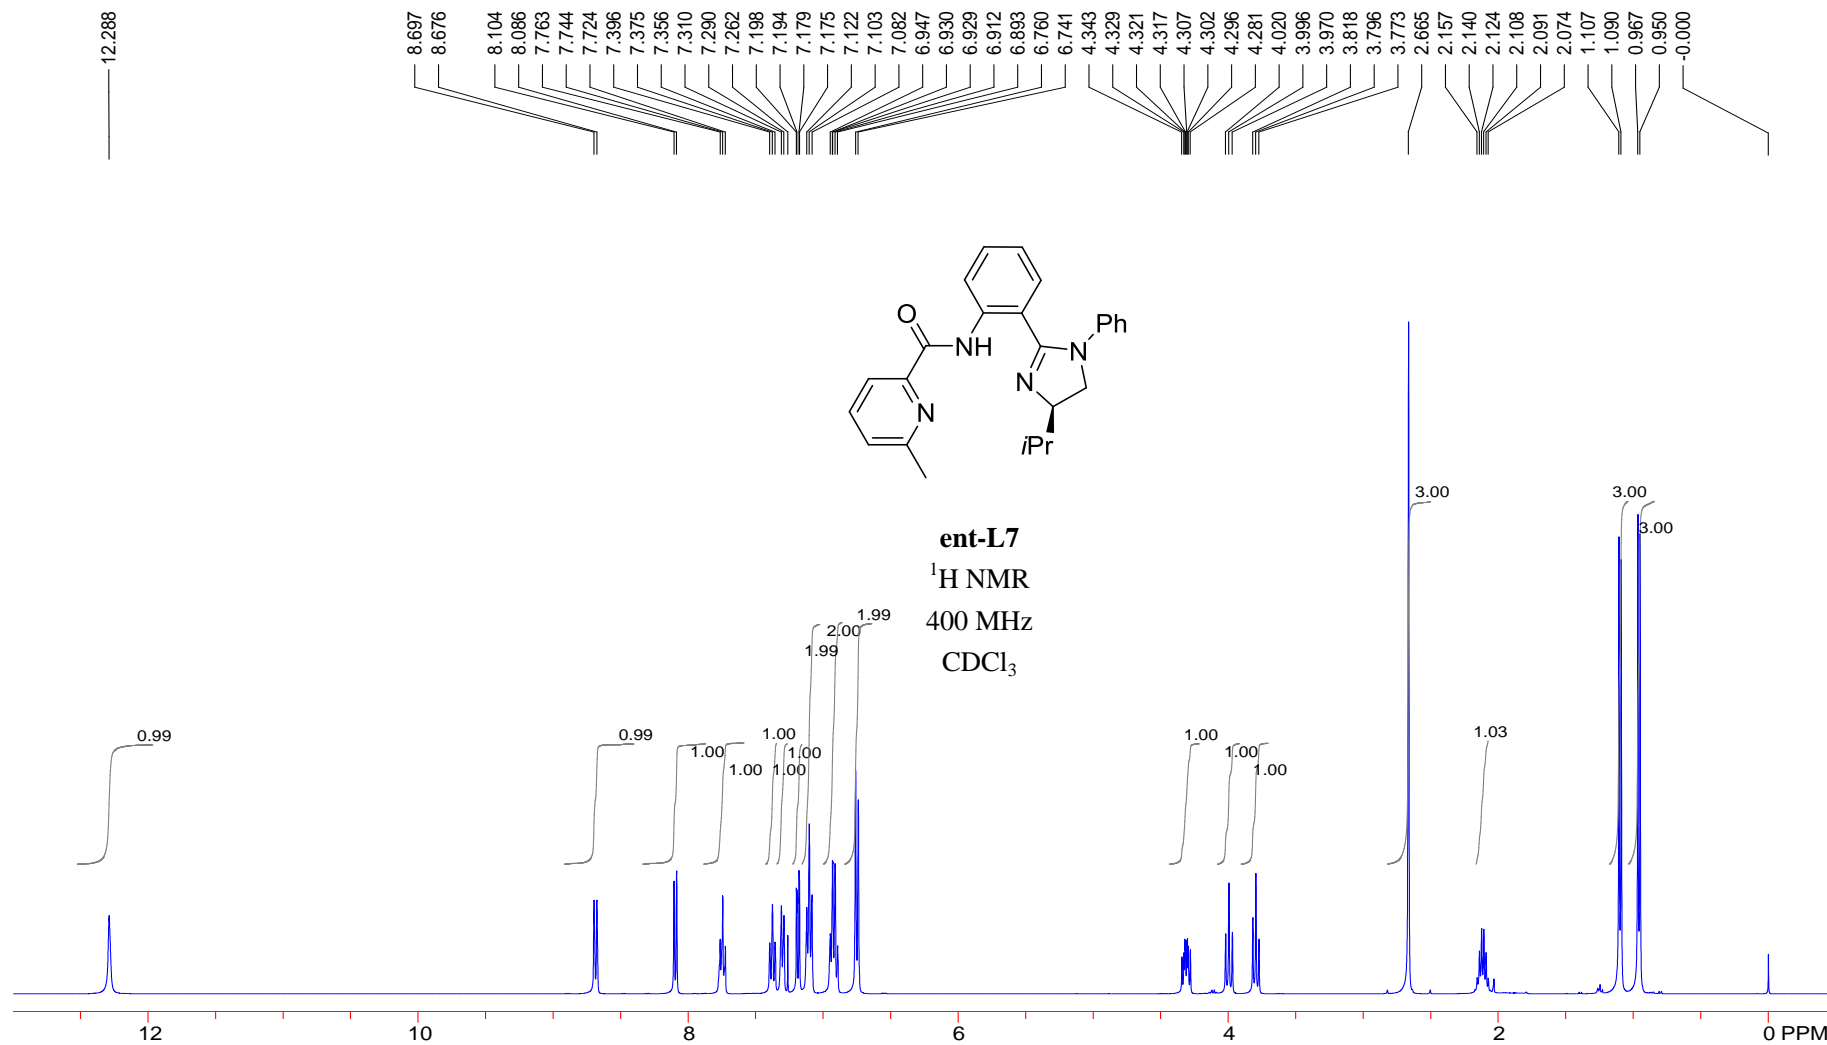

Supplementary Figure 45. <sup>1</sup>H NMR spectrum for **ent-L7**

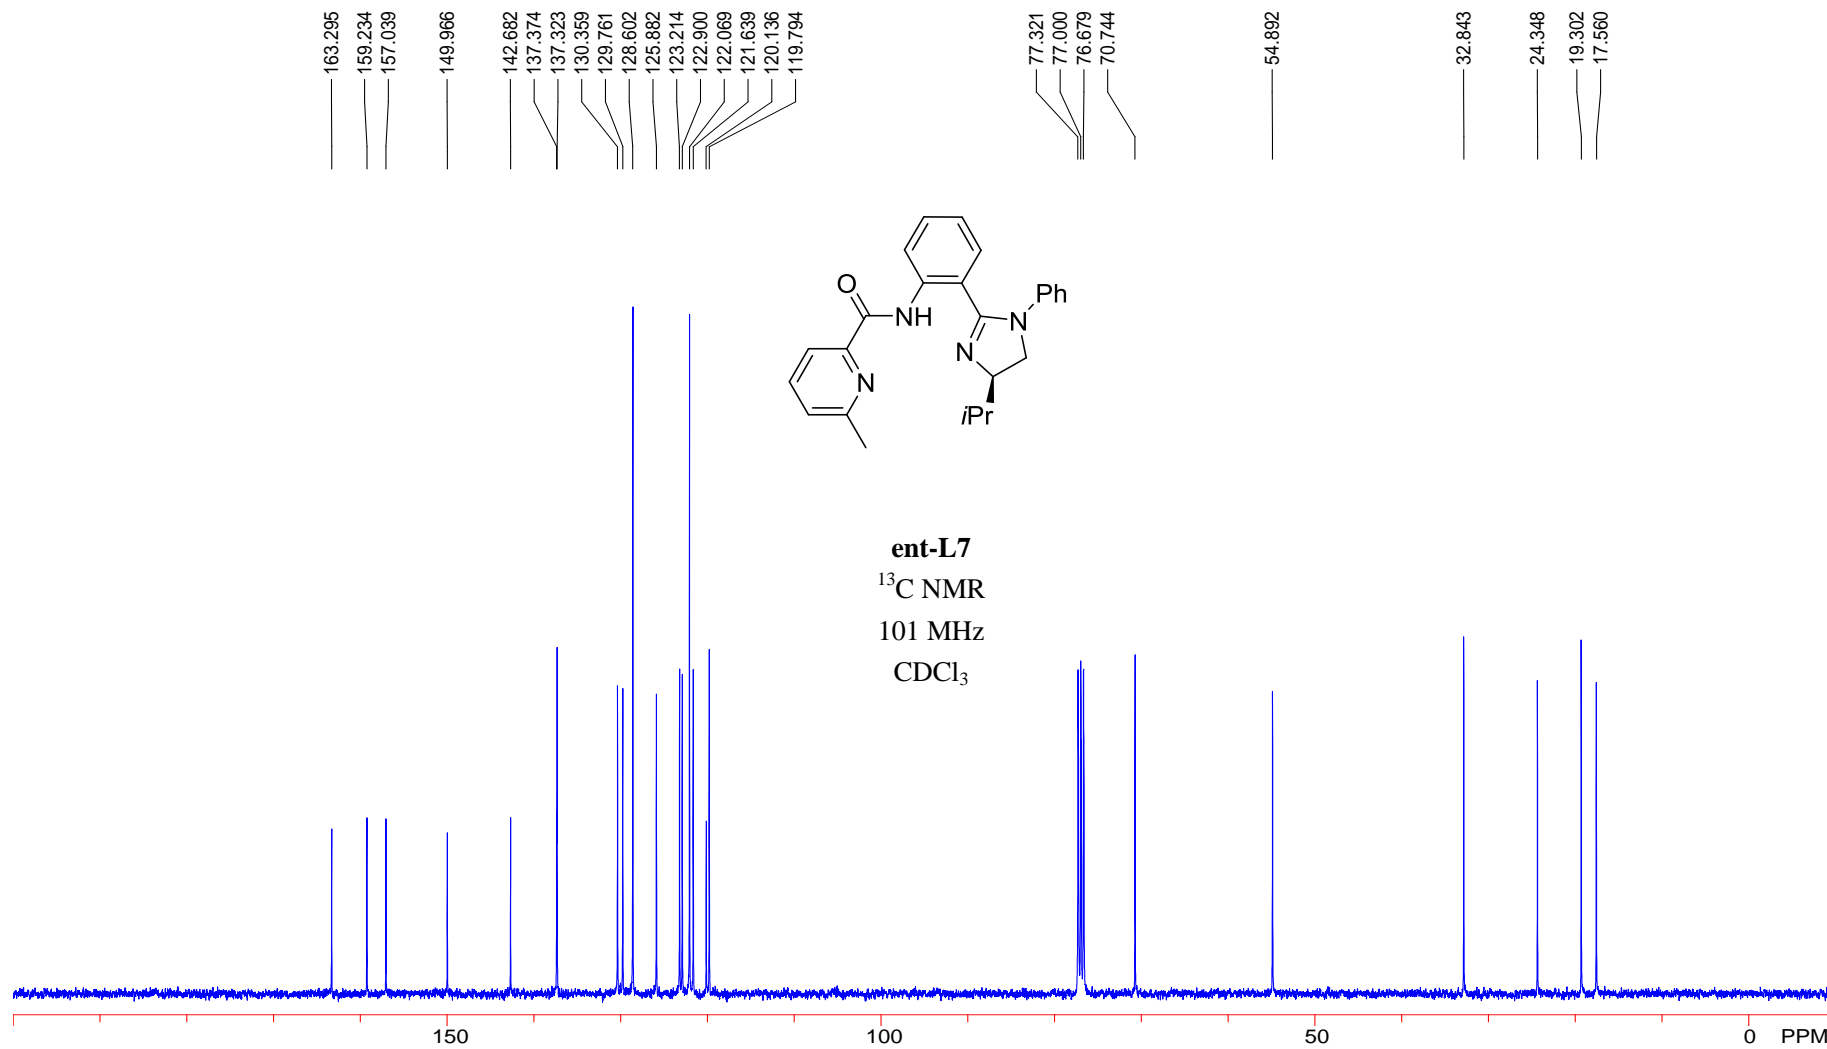

Supplementary Figure 46. <sup>13</sup>C NMR spectrum for ent-L7

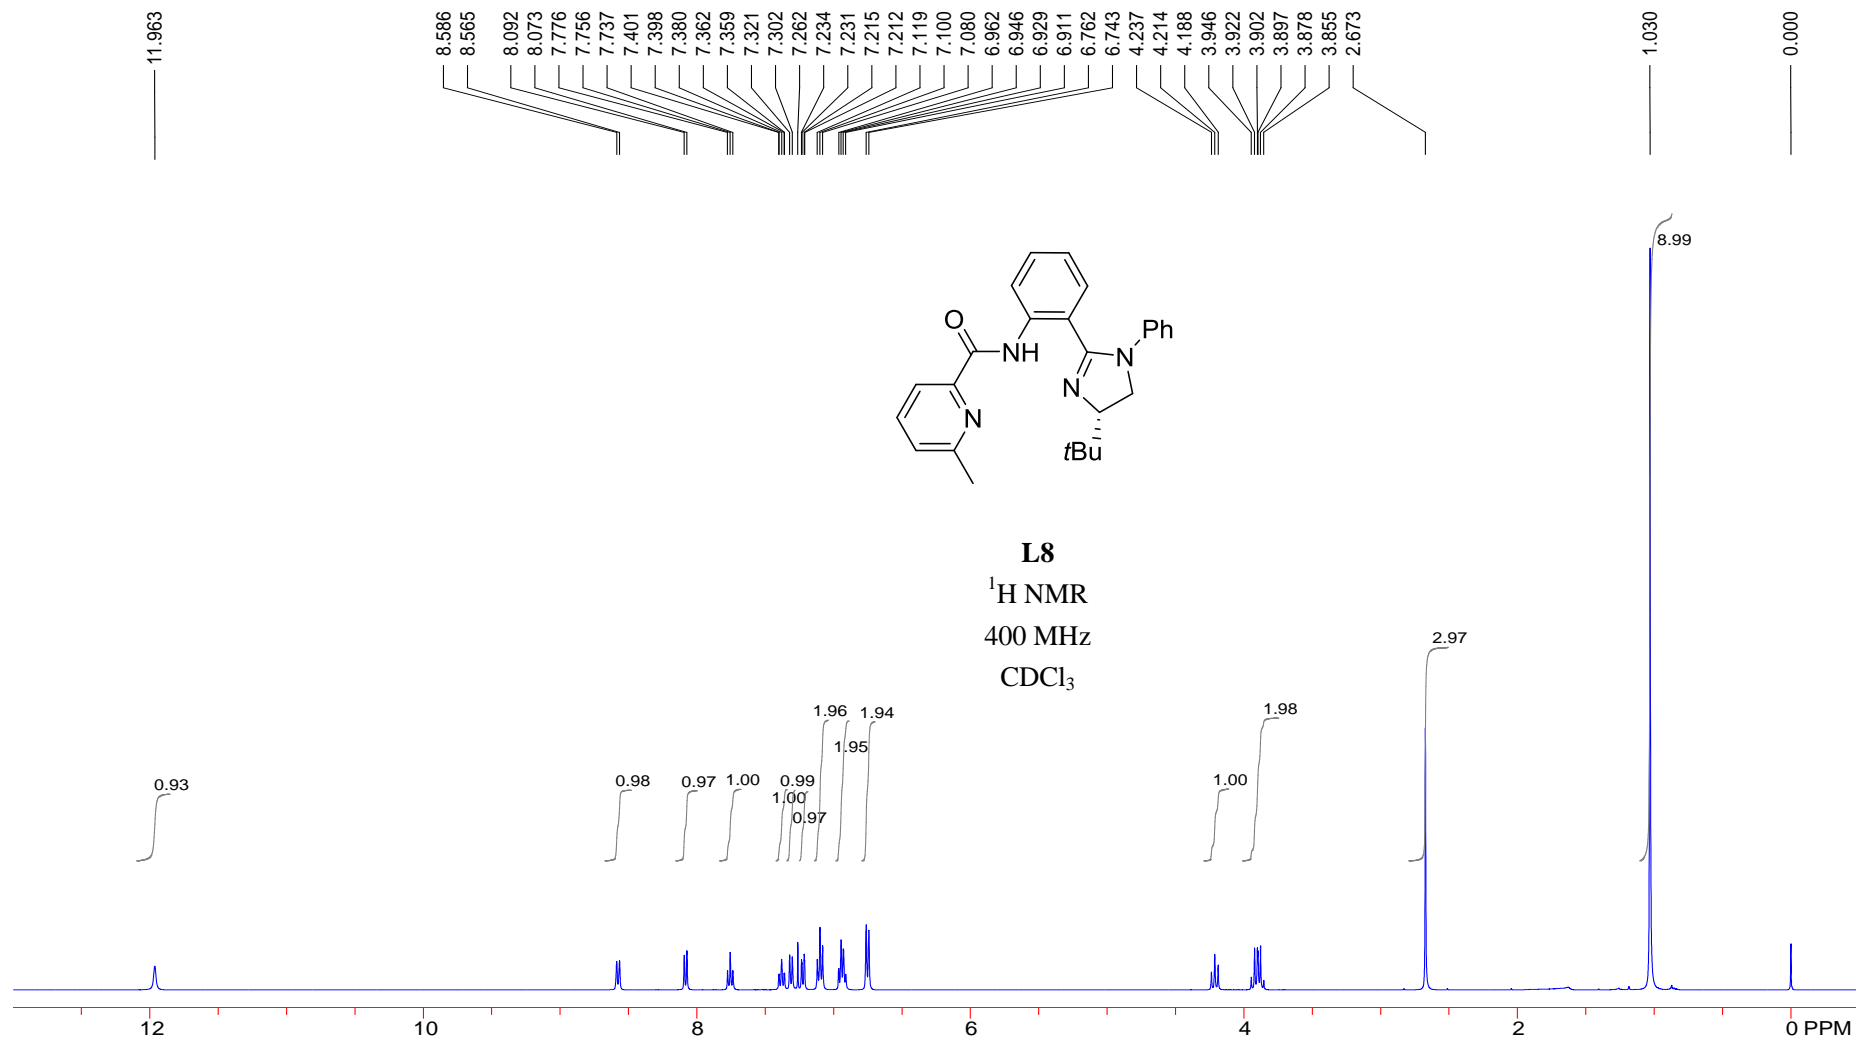

Supplementary Figure 47. <sup>1</sup>H NMR spectrum for L8



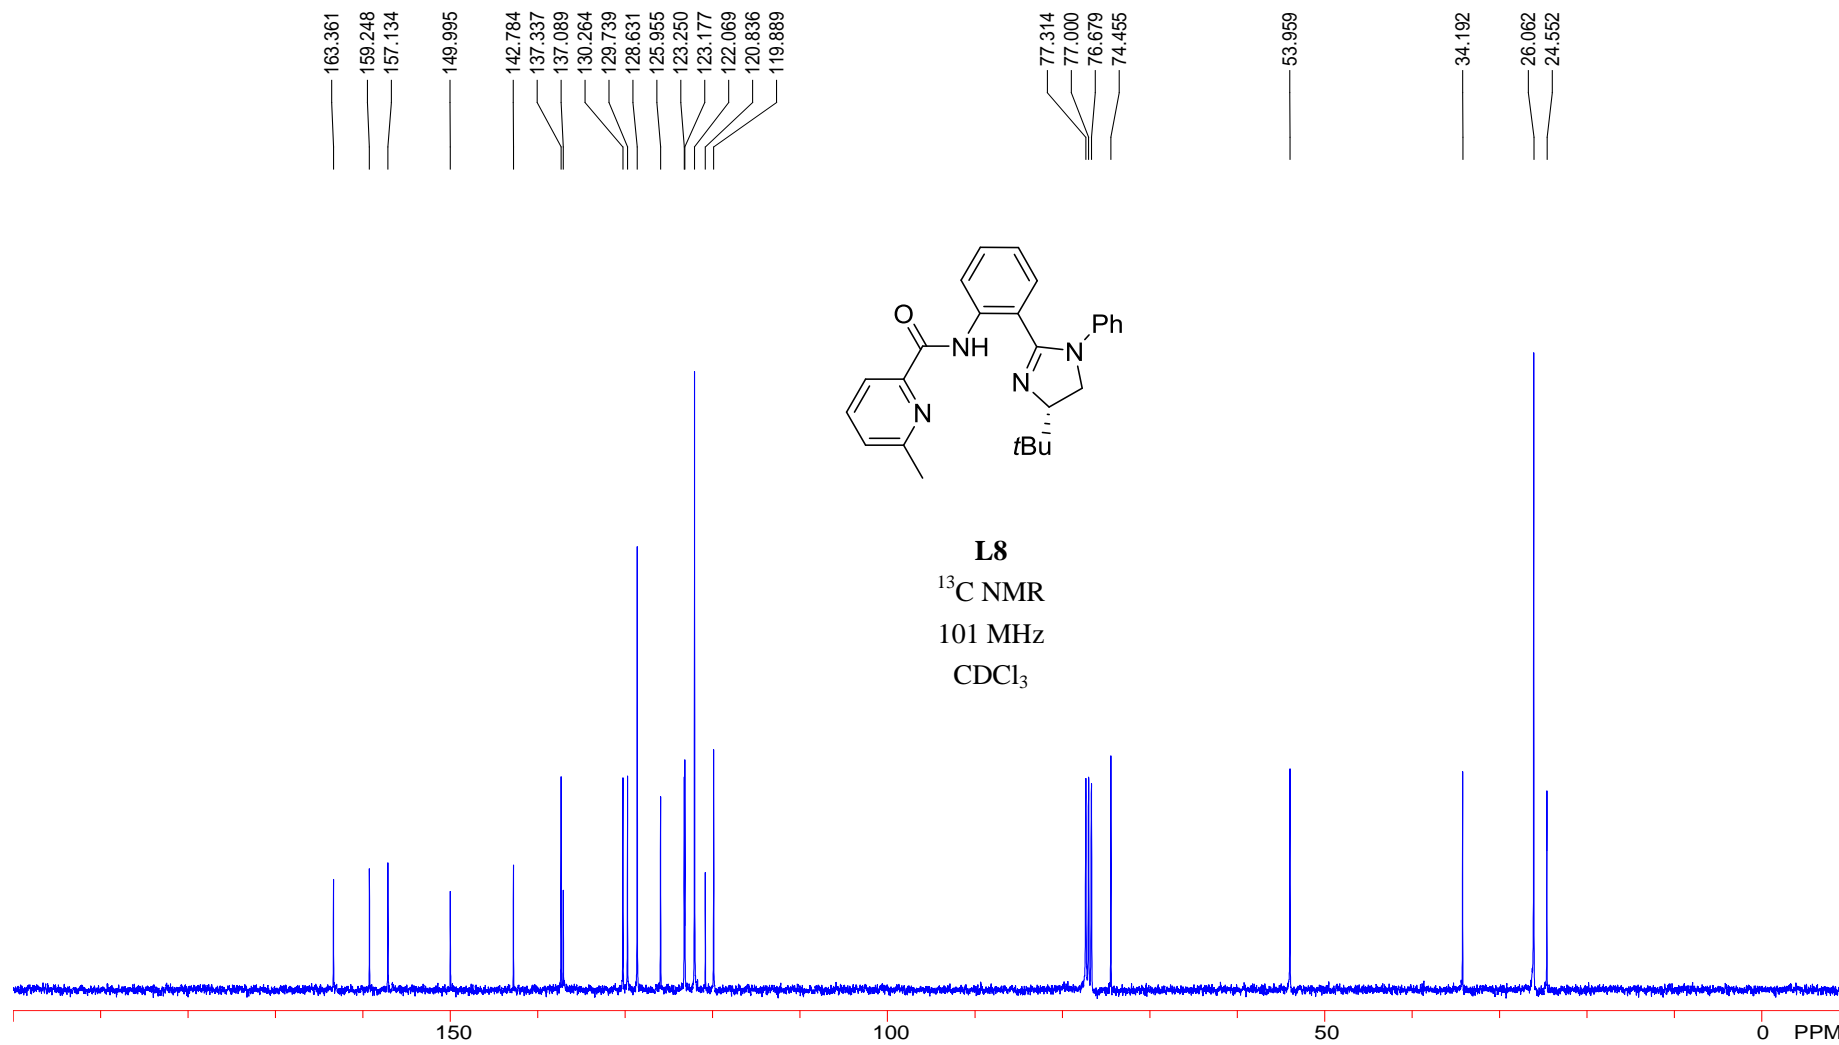

**Supplementary Figure 48.**  $^{13}\text{C}$  NMR spectrum for **L8**

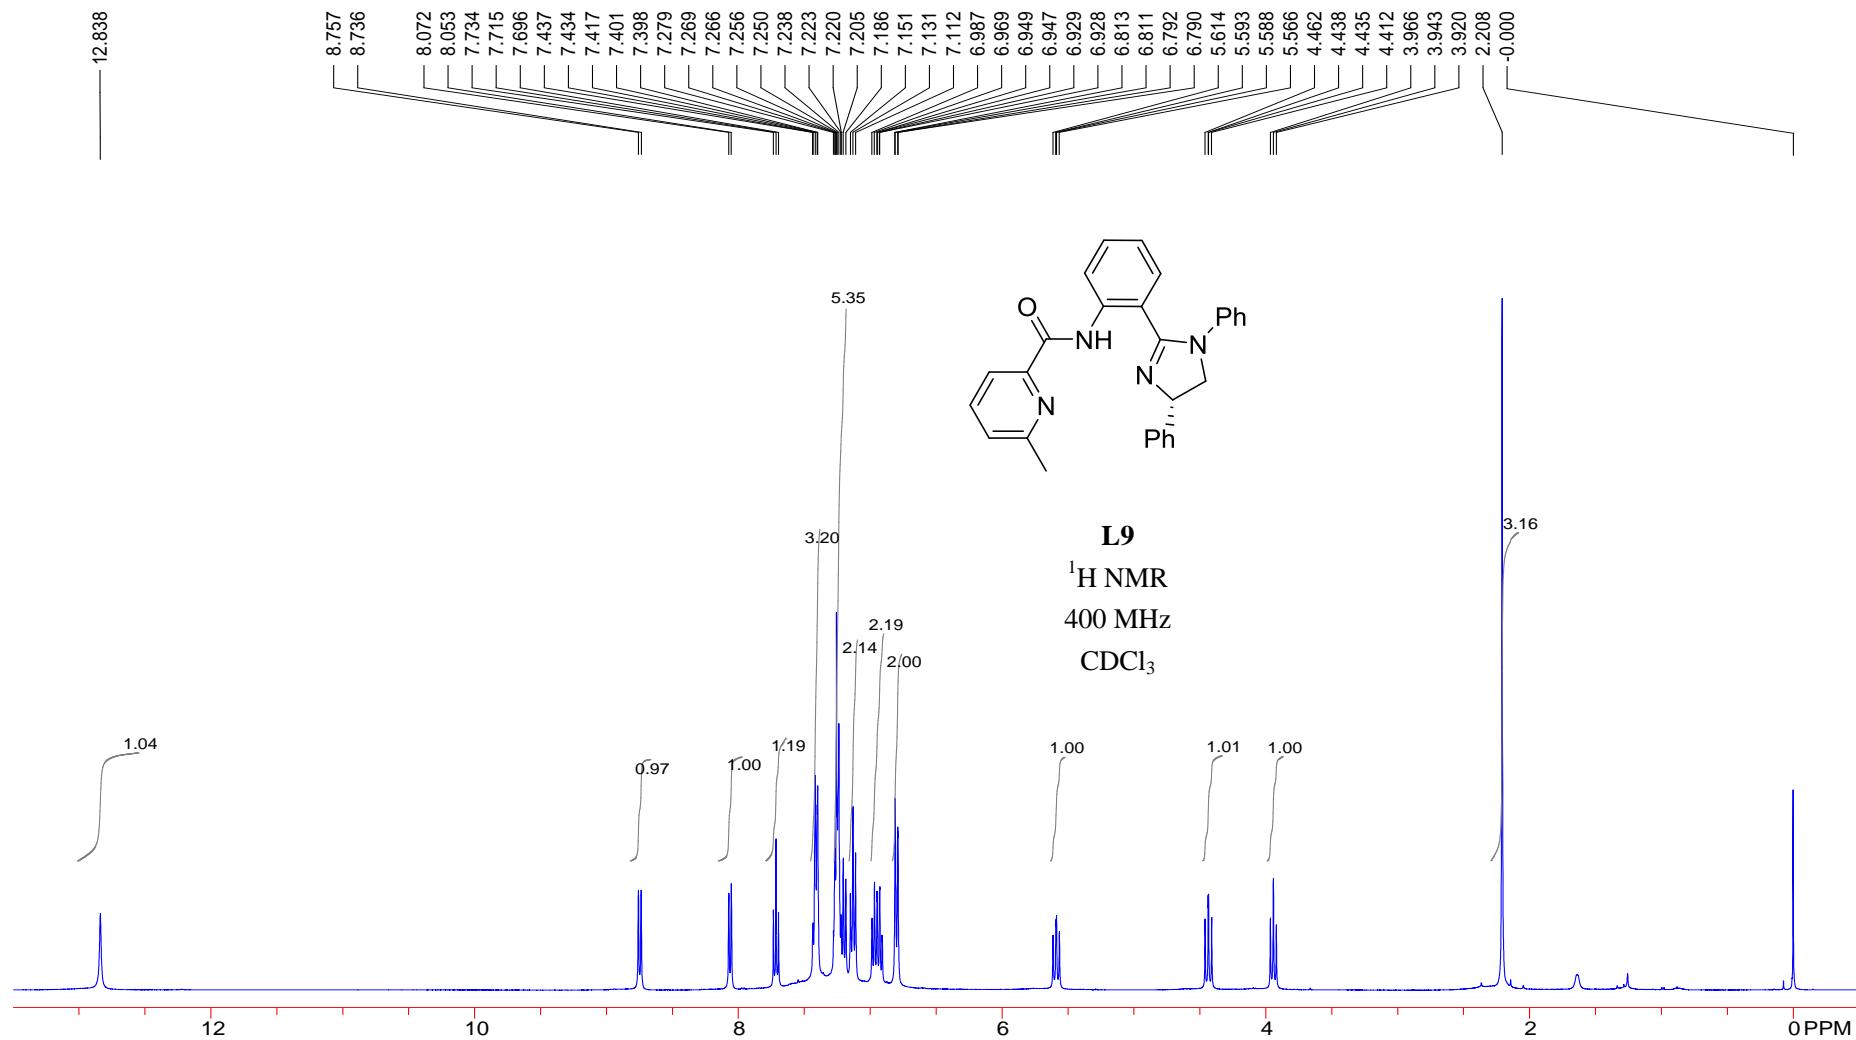

Supplementary Figure 49. <sup>1</sup>H NMR spectrum for L9

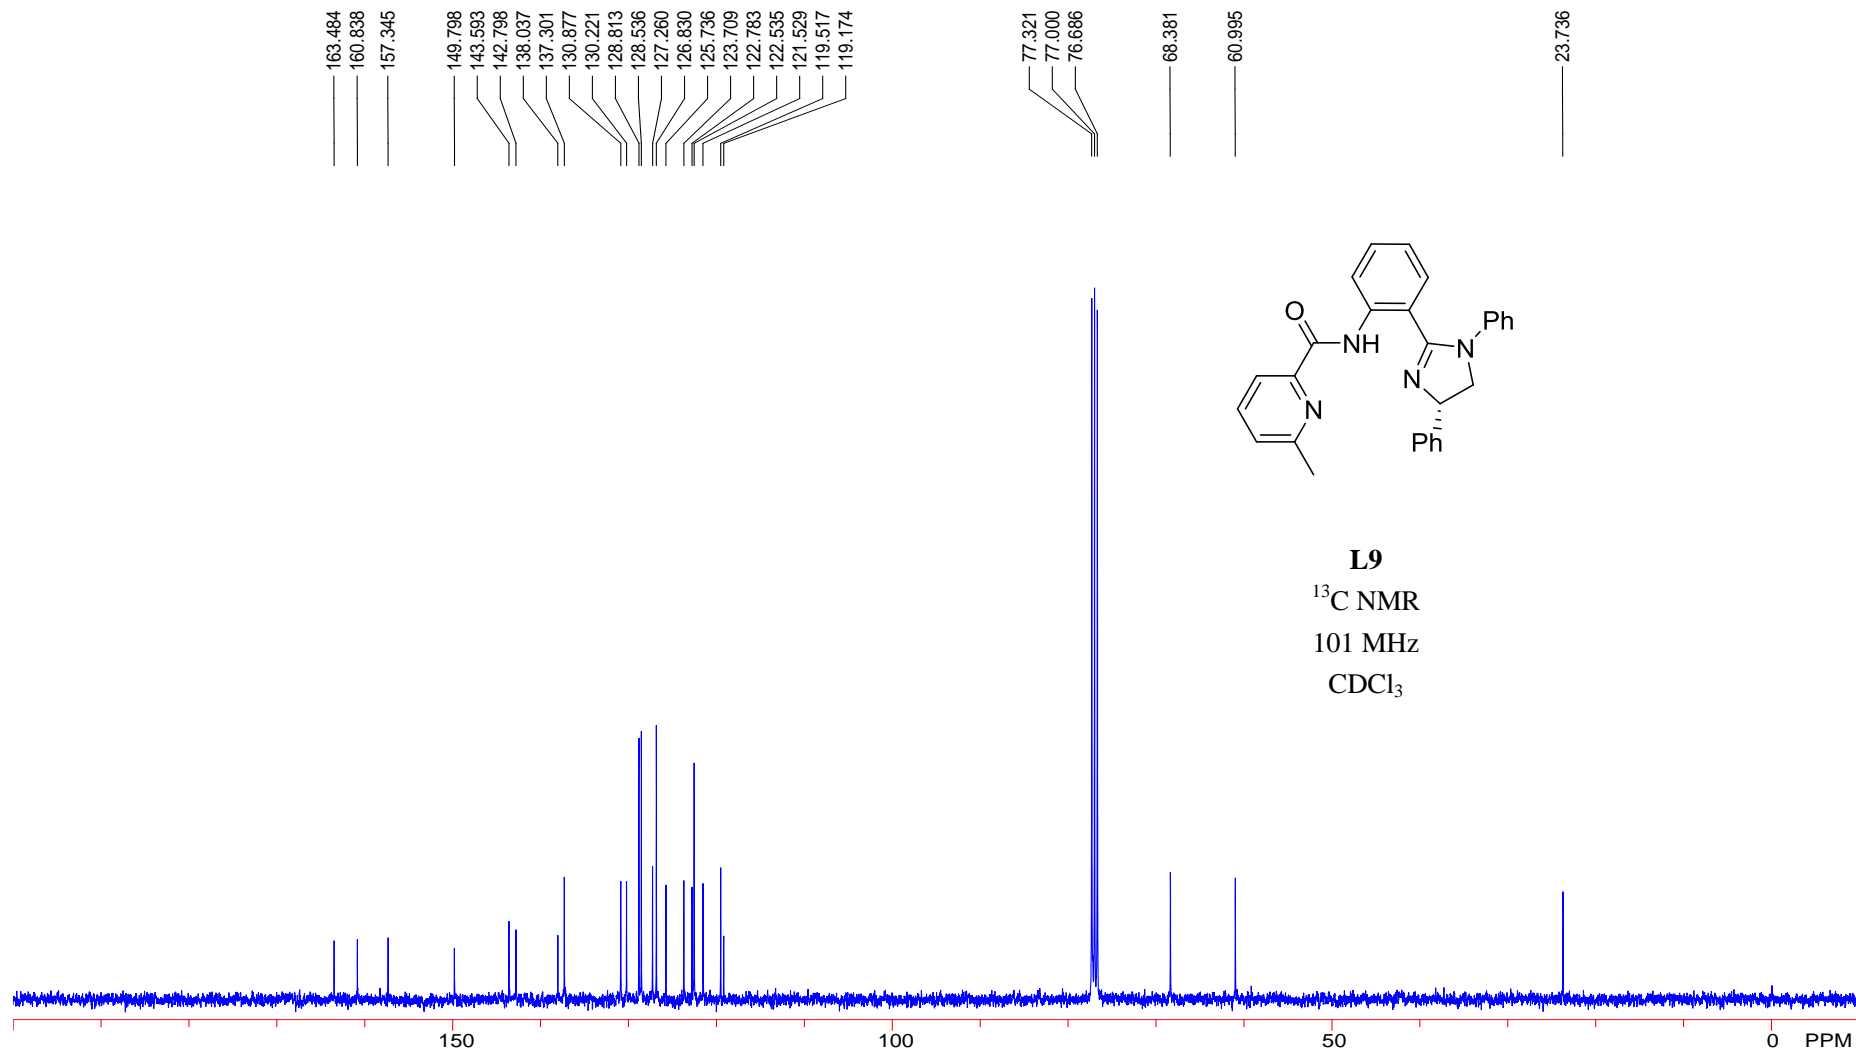

Supplementary Figure 50.  $^{13}\text{C}$  NMR spectrum for **L9**

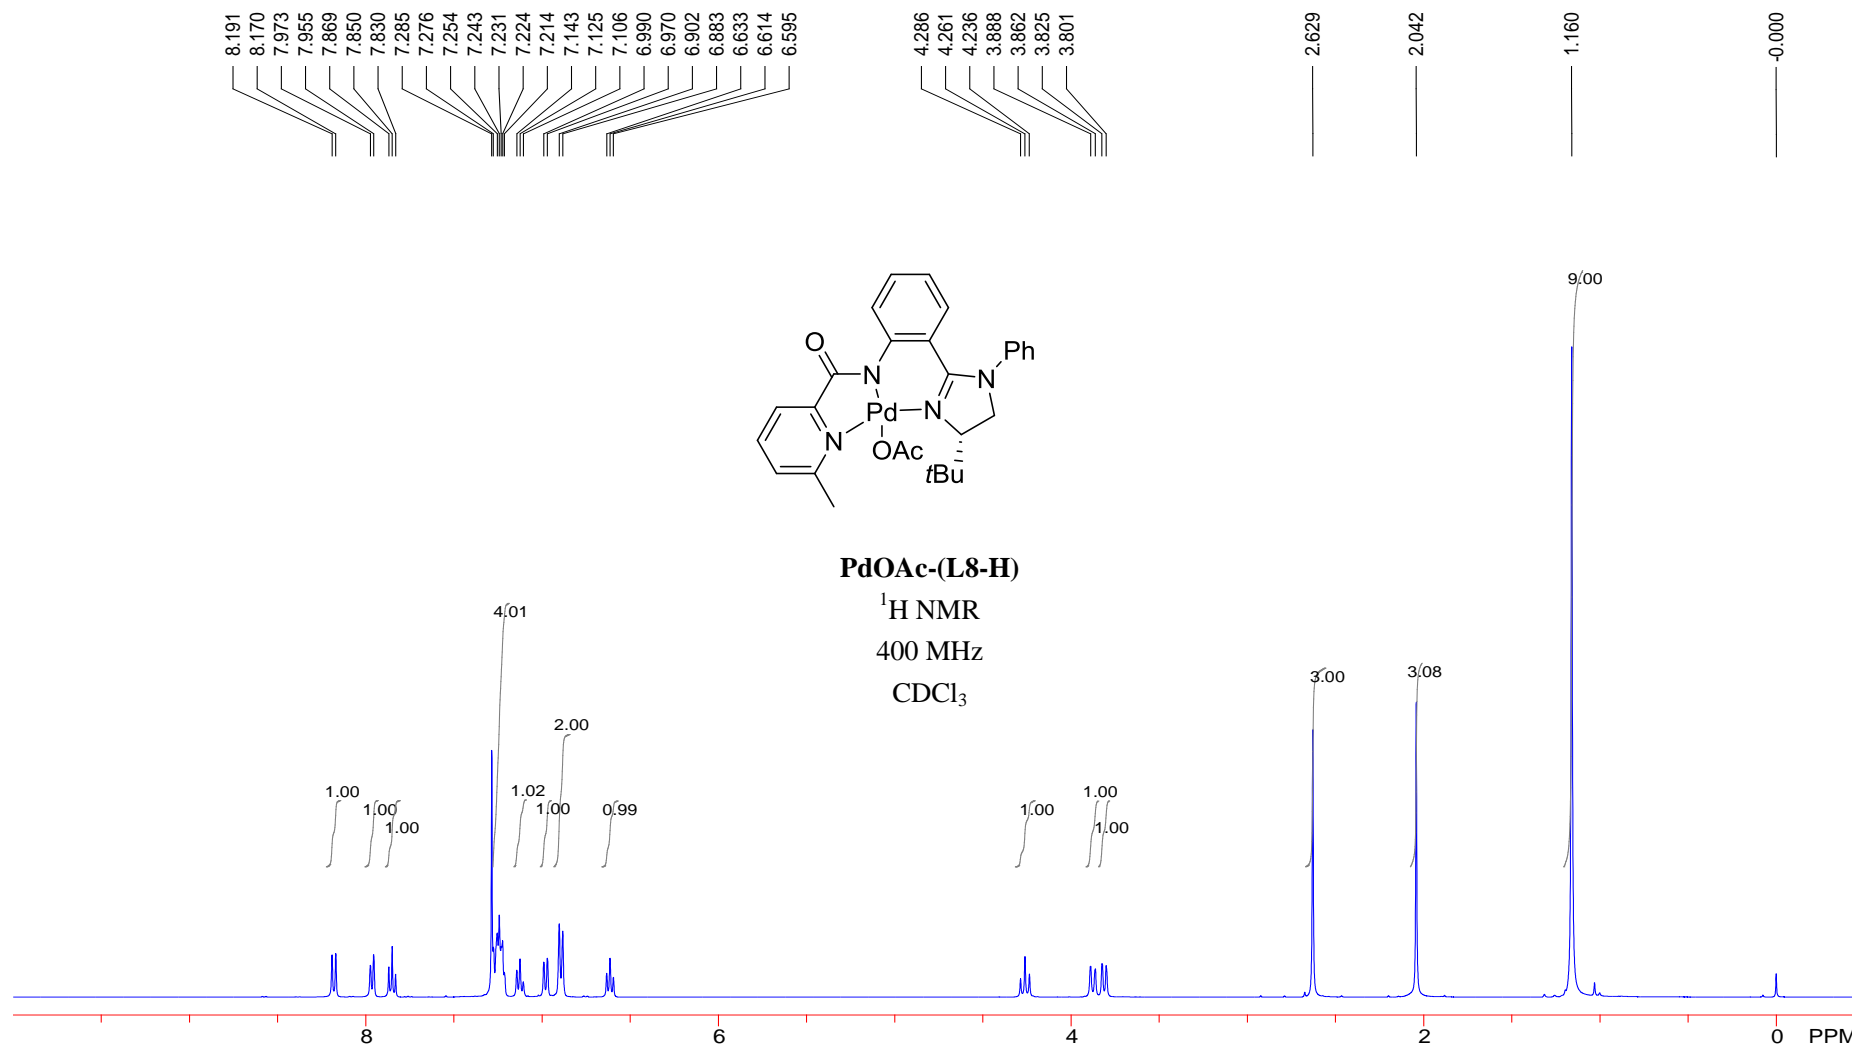

**Supplementary Figure 51. <sup>1</sup>H NMR spectrum for PdOAc-(L8-H)**

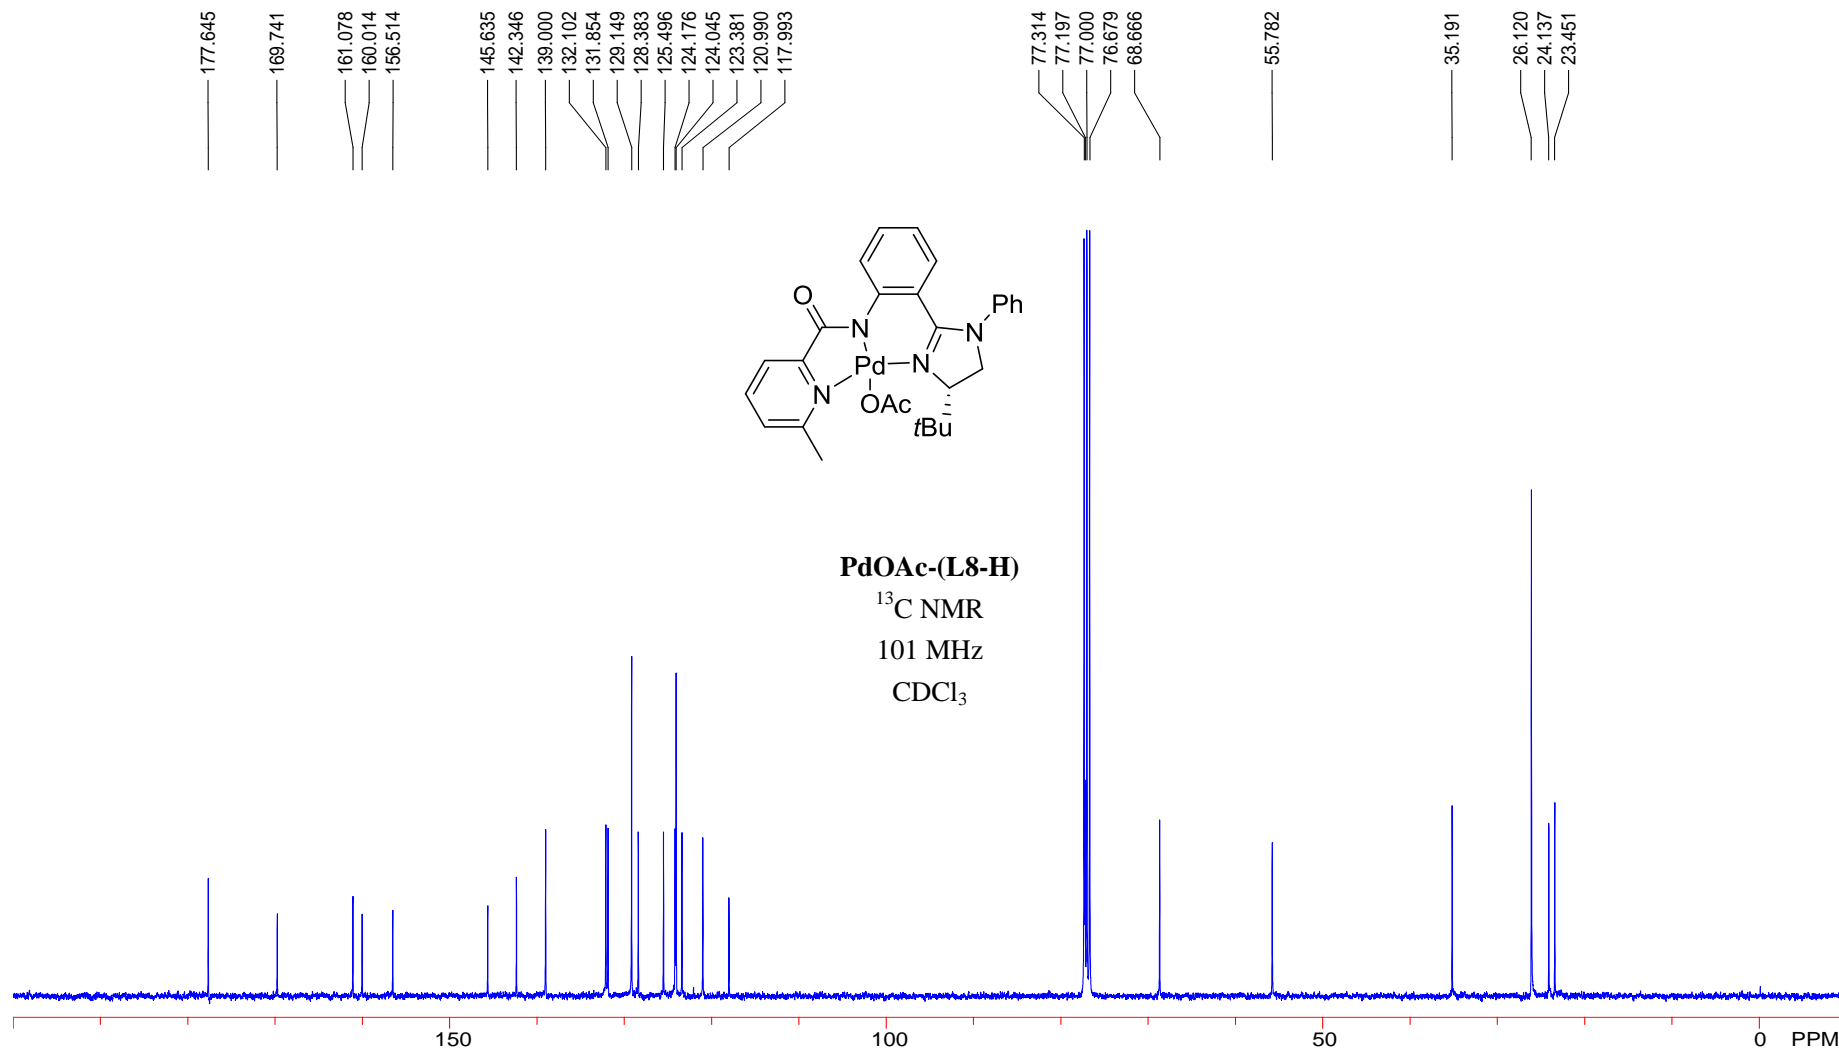

Supplementary Figure 52.  $^{13}\text{C}$  NMR spectrum for PdOAc-(L8-H)

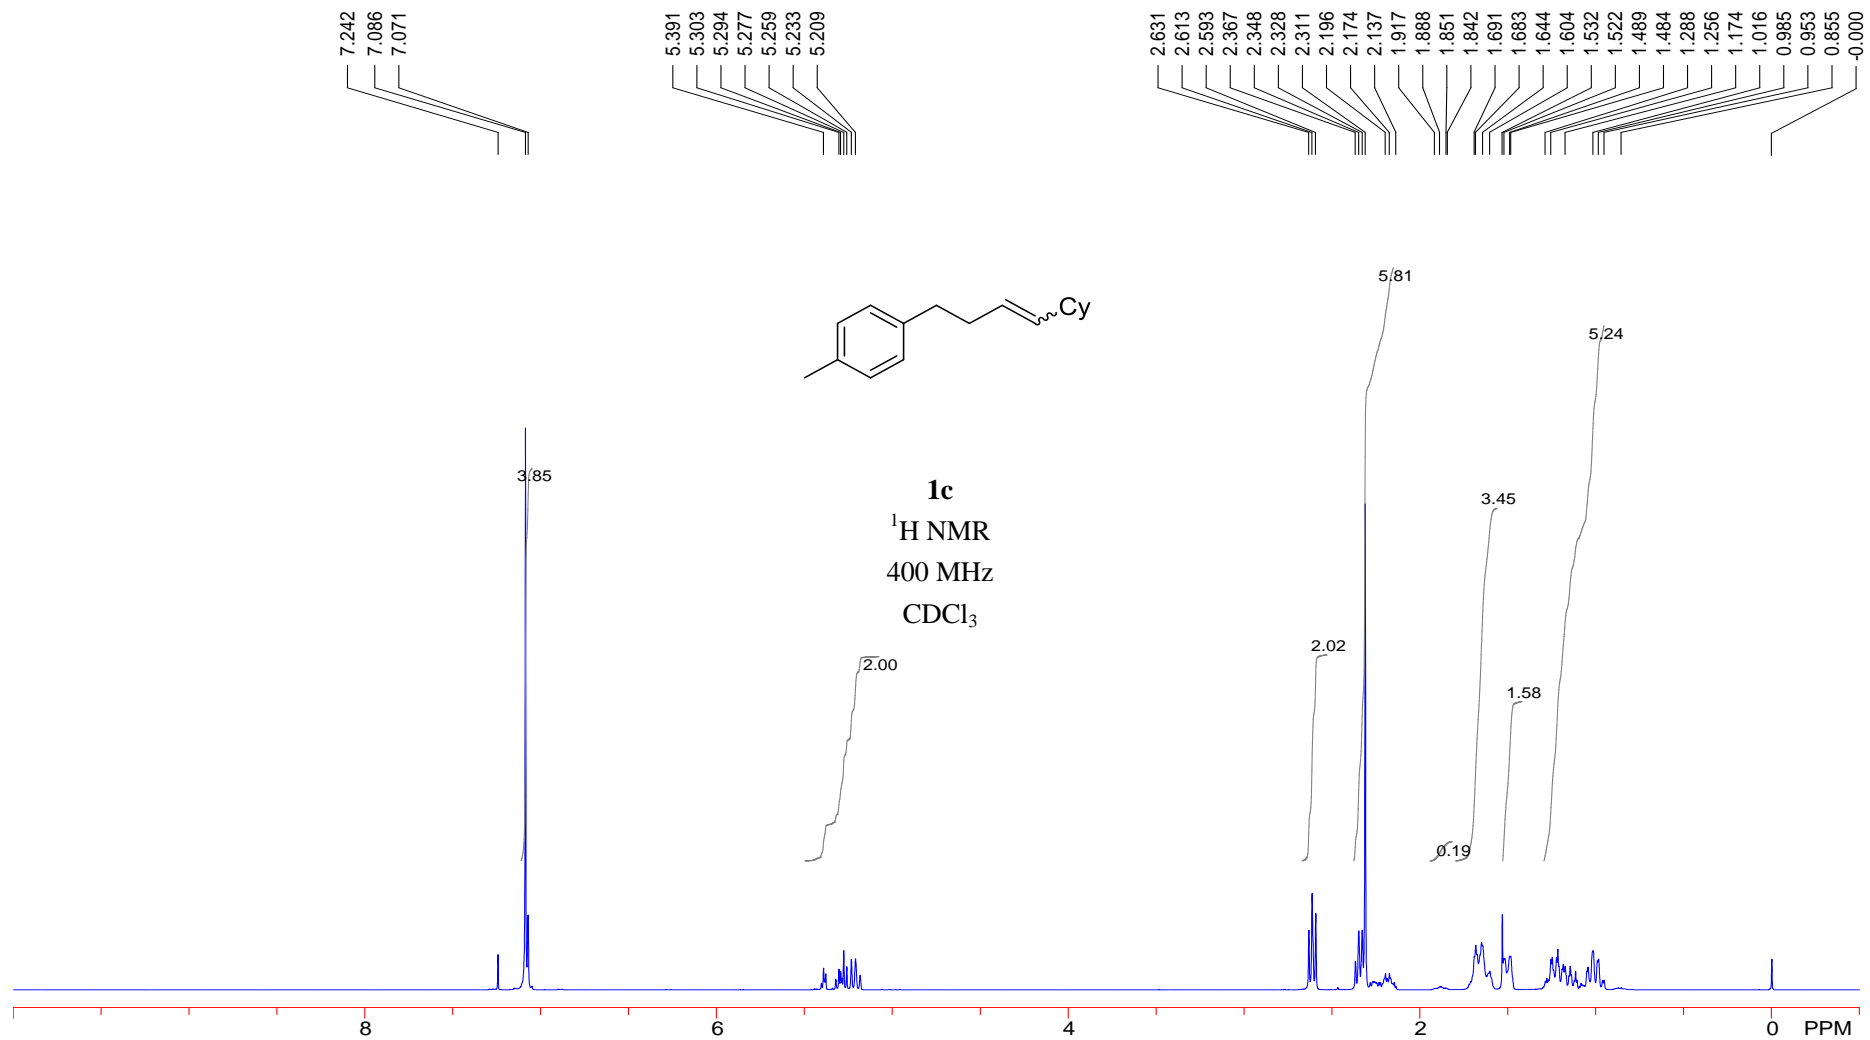

Supplementary Figure 53. <sup>1</sup>H NMR spectrum for **1c**

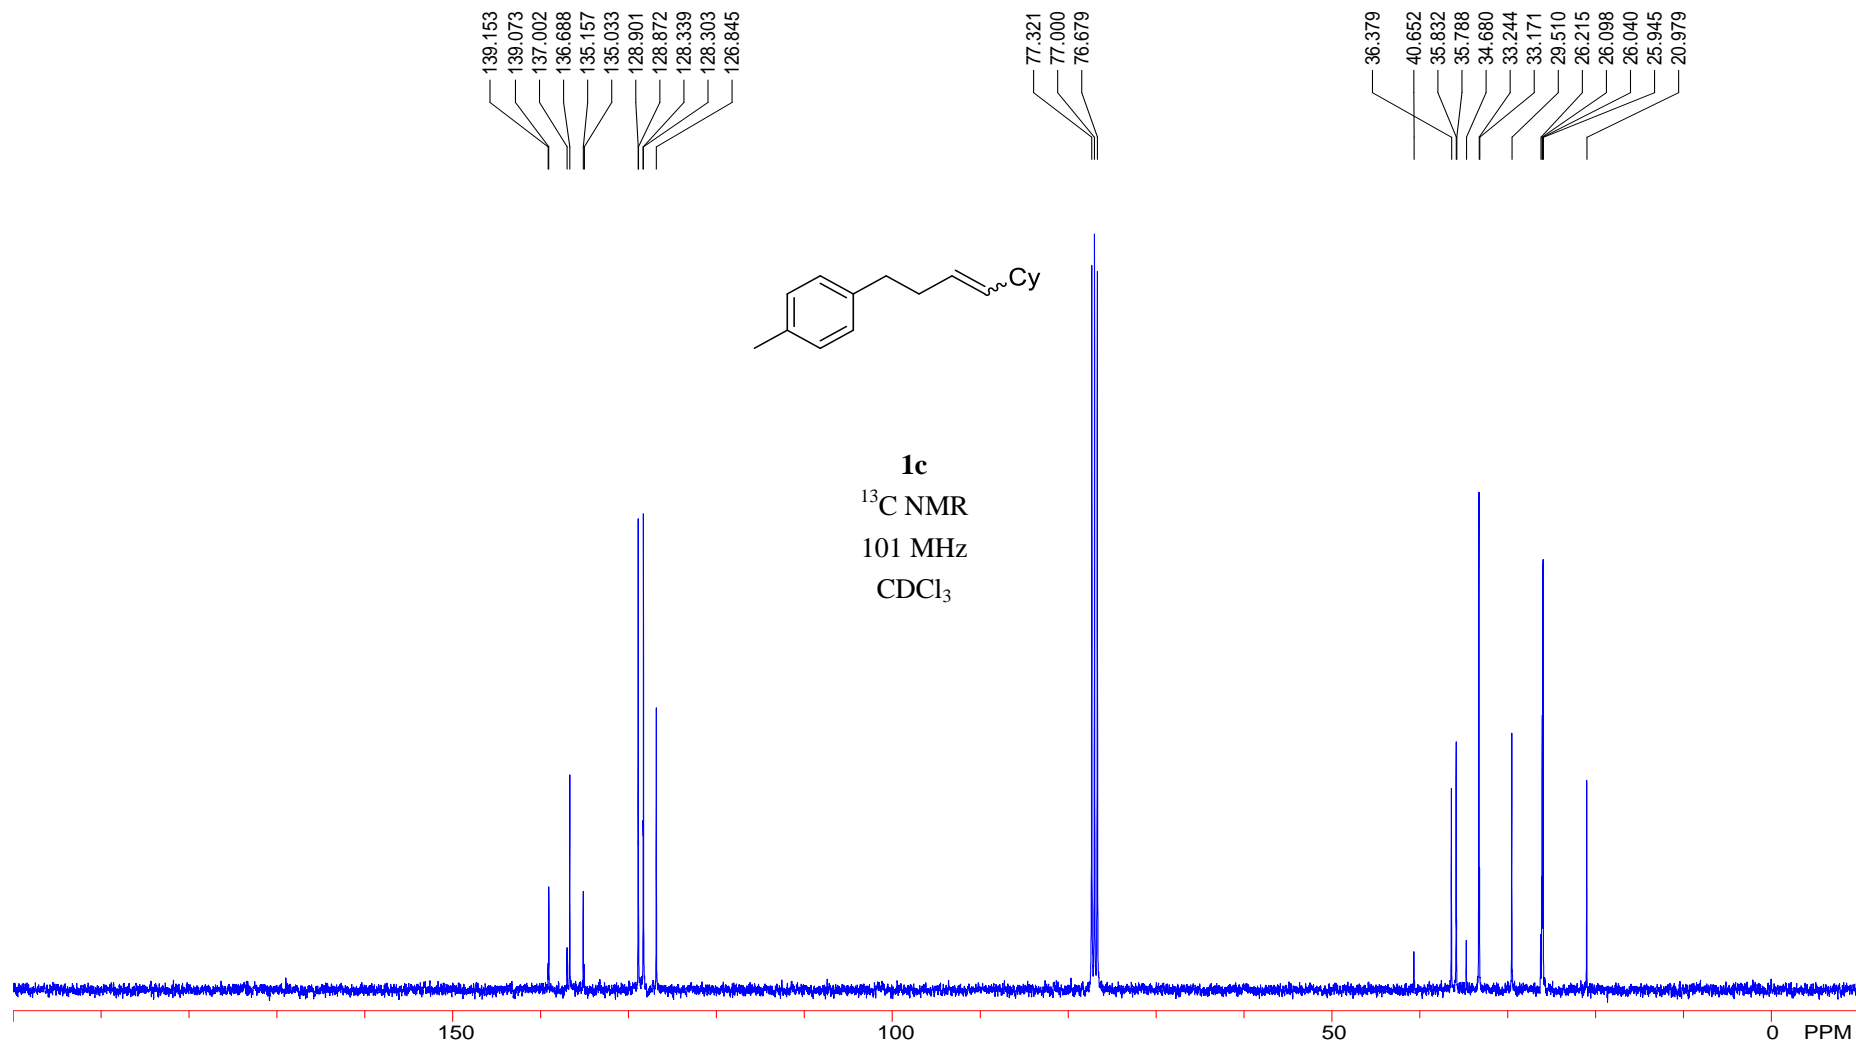

Supplementary Figure 54. <sup>13</sup>C NMR spectrum for **1c**

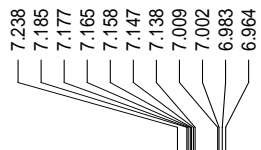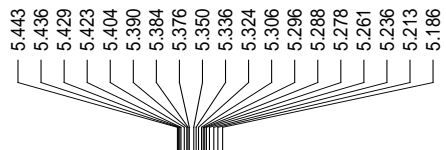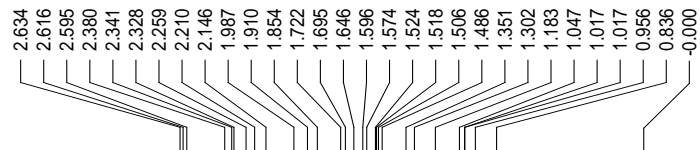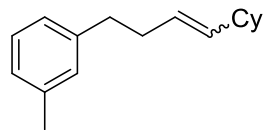

**1d**  
<sup>1</sup>H NMR  
400 MHz  
CDCl<sub>3</sub>

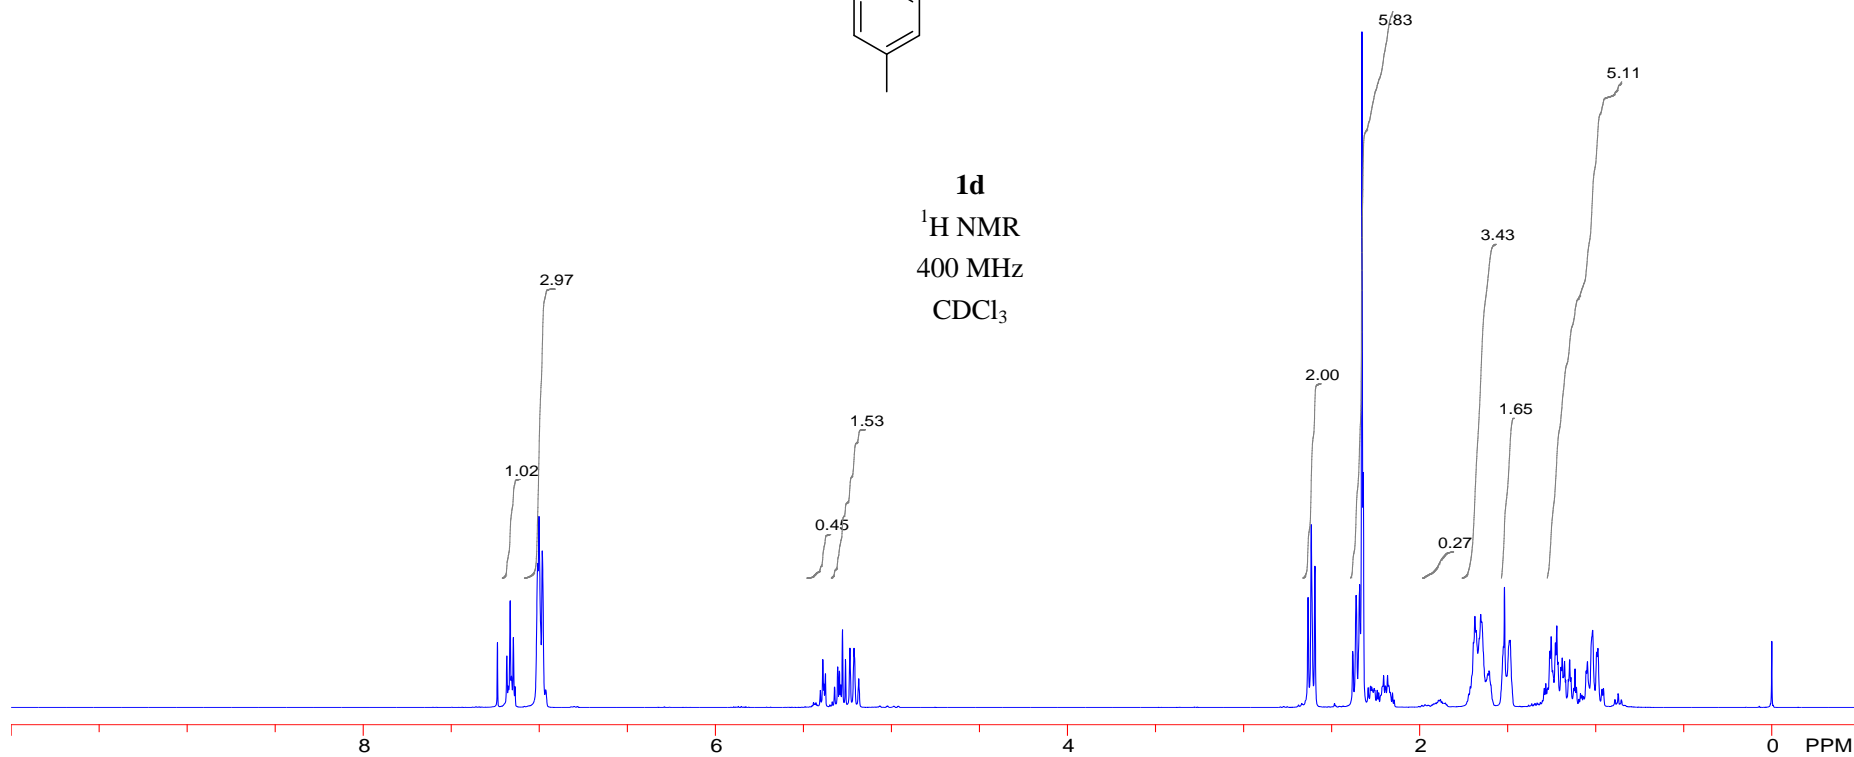

**Supplementary Figure 55. <sup>1</sup>H NMR spectrum for 1d**



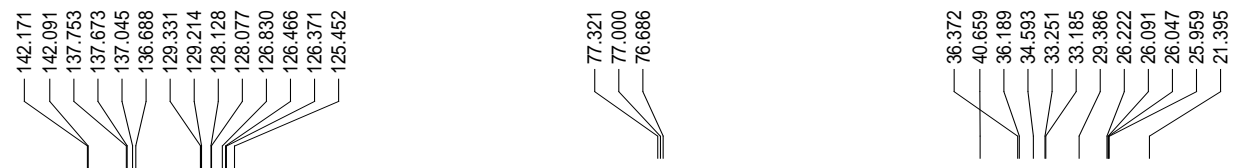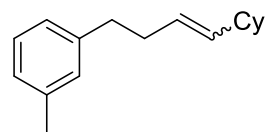

**1d**  
<sup>13</sup>C NMR  
101 MHz  
CDCl<sub>3</sub>

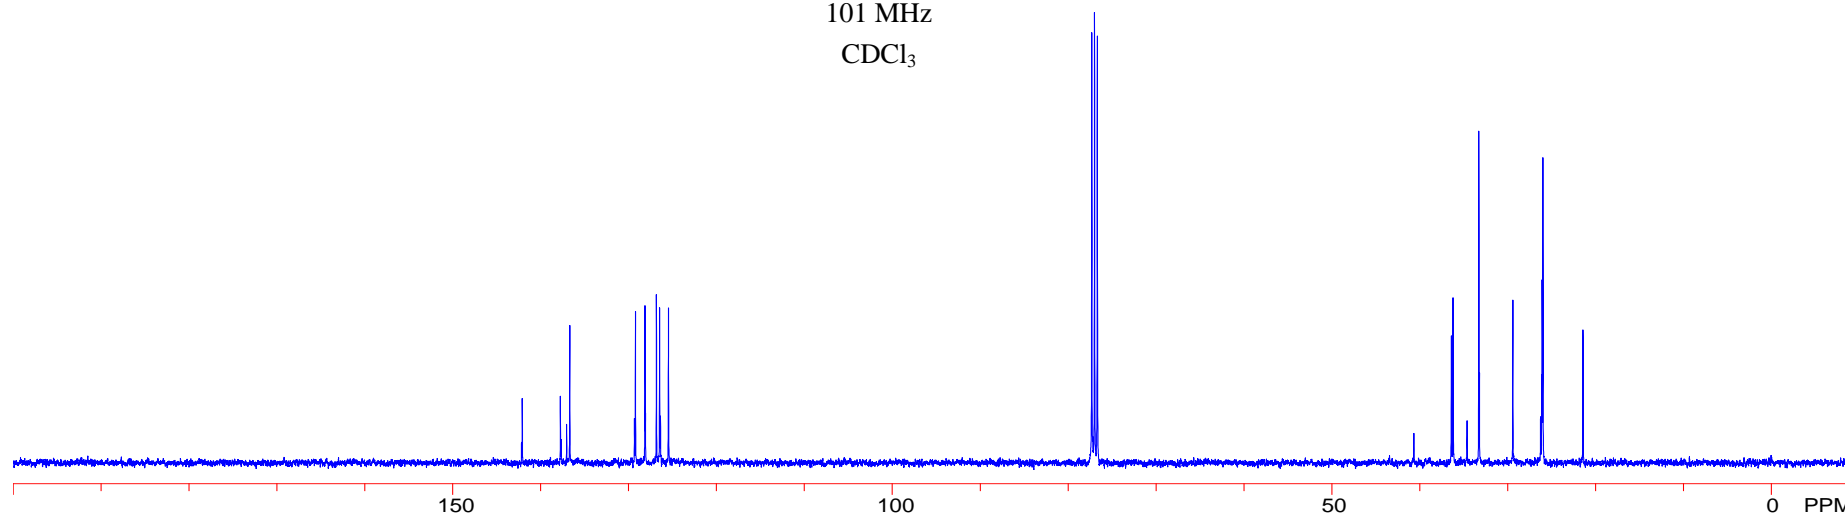

**Supplementary Figure 56.** <sup>13</sup>C NMR spectrum for **1d**

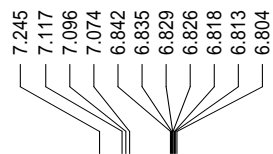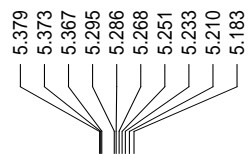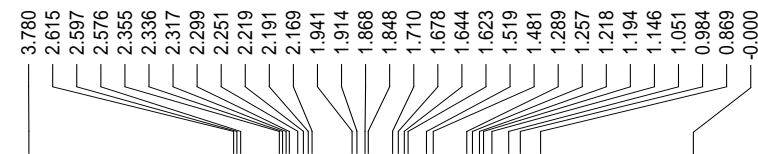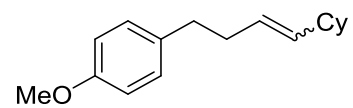

**1e**  
<sup>1</sup>H NMR  
400 MHz  
CDCl<sub>3</sub>

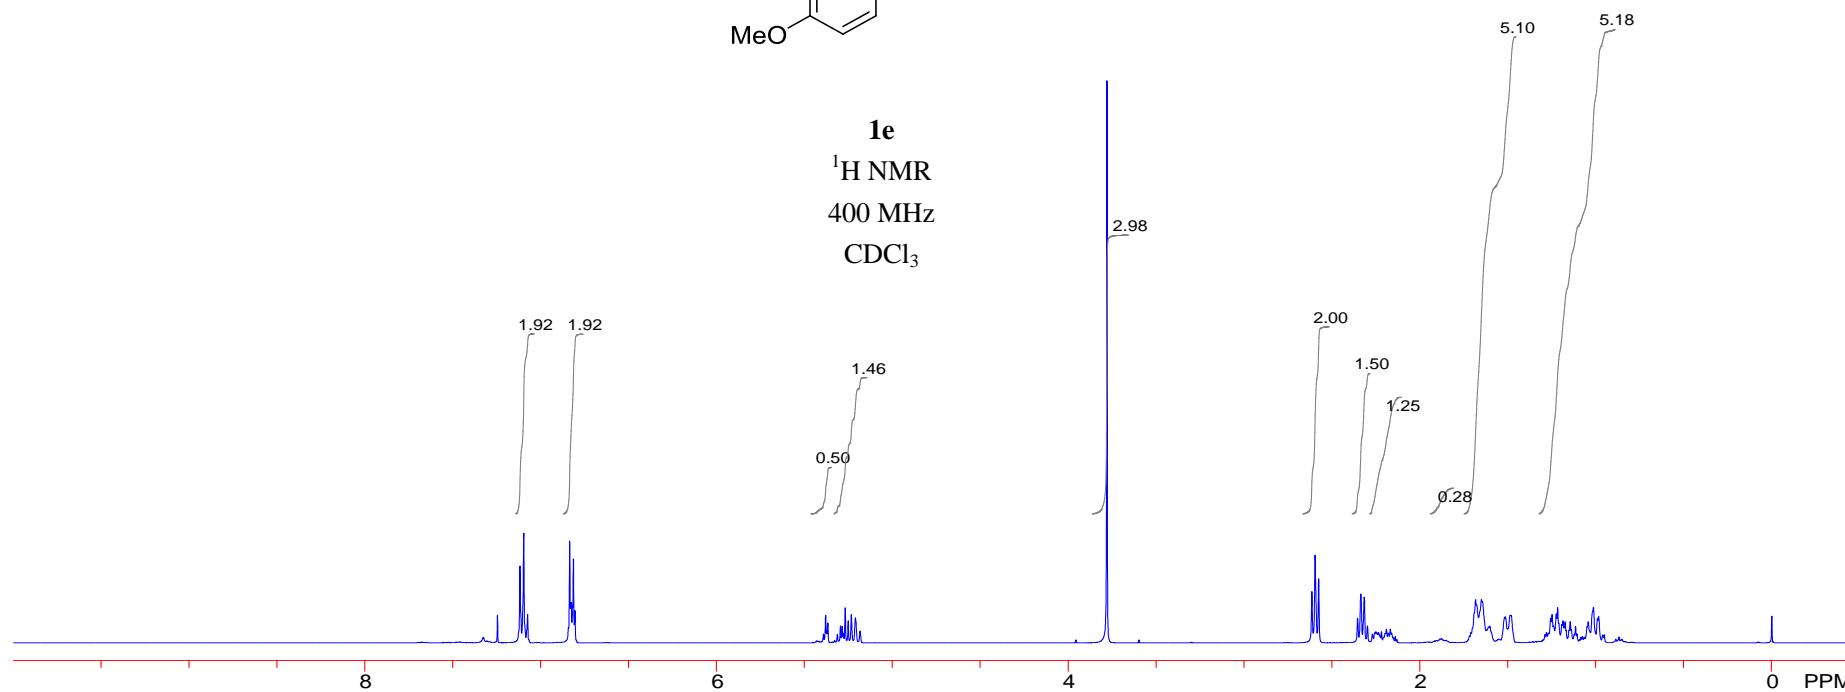

Supplementary Figure 57. <sup>1</sup>H NMR spectrum for **1e**

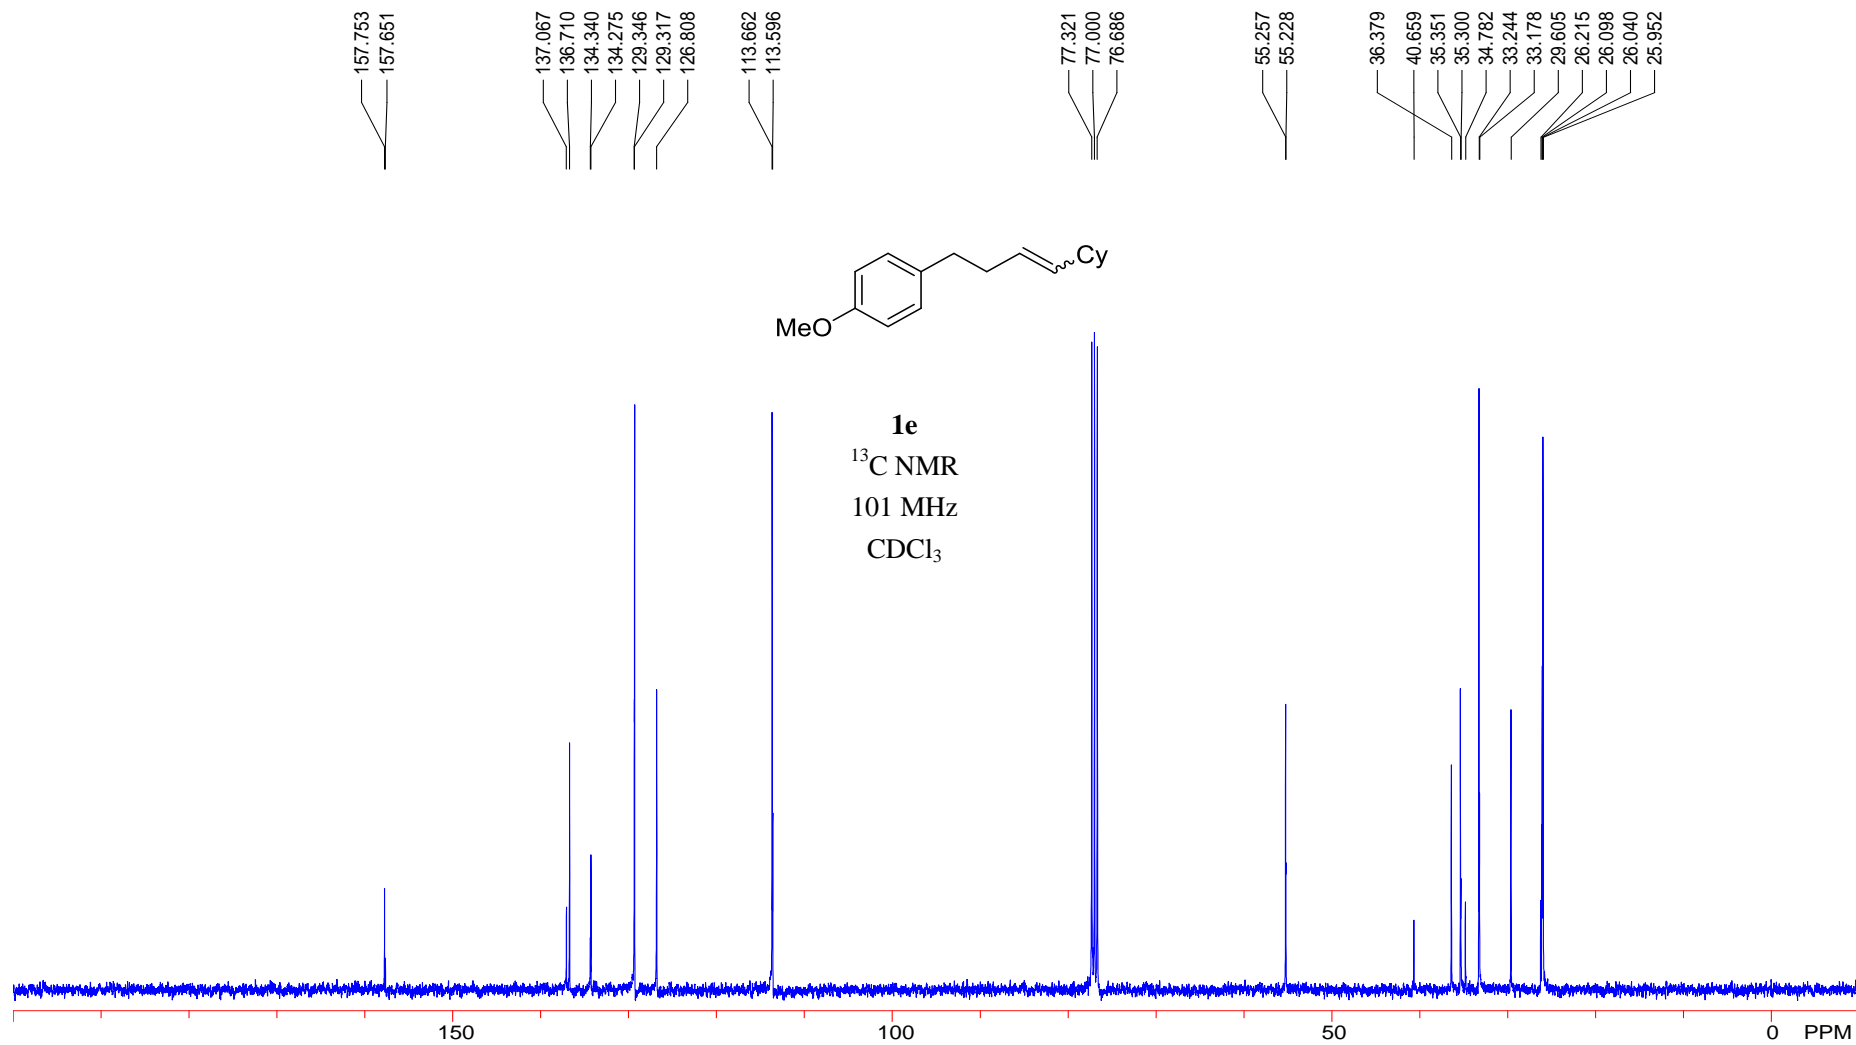

Supplementary Figure 58.  $^{13}\text{C}$  NMR spectrum for **1e**

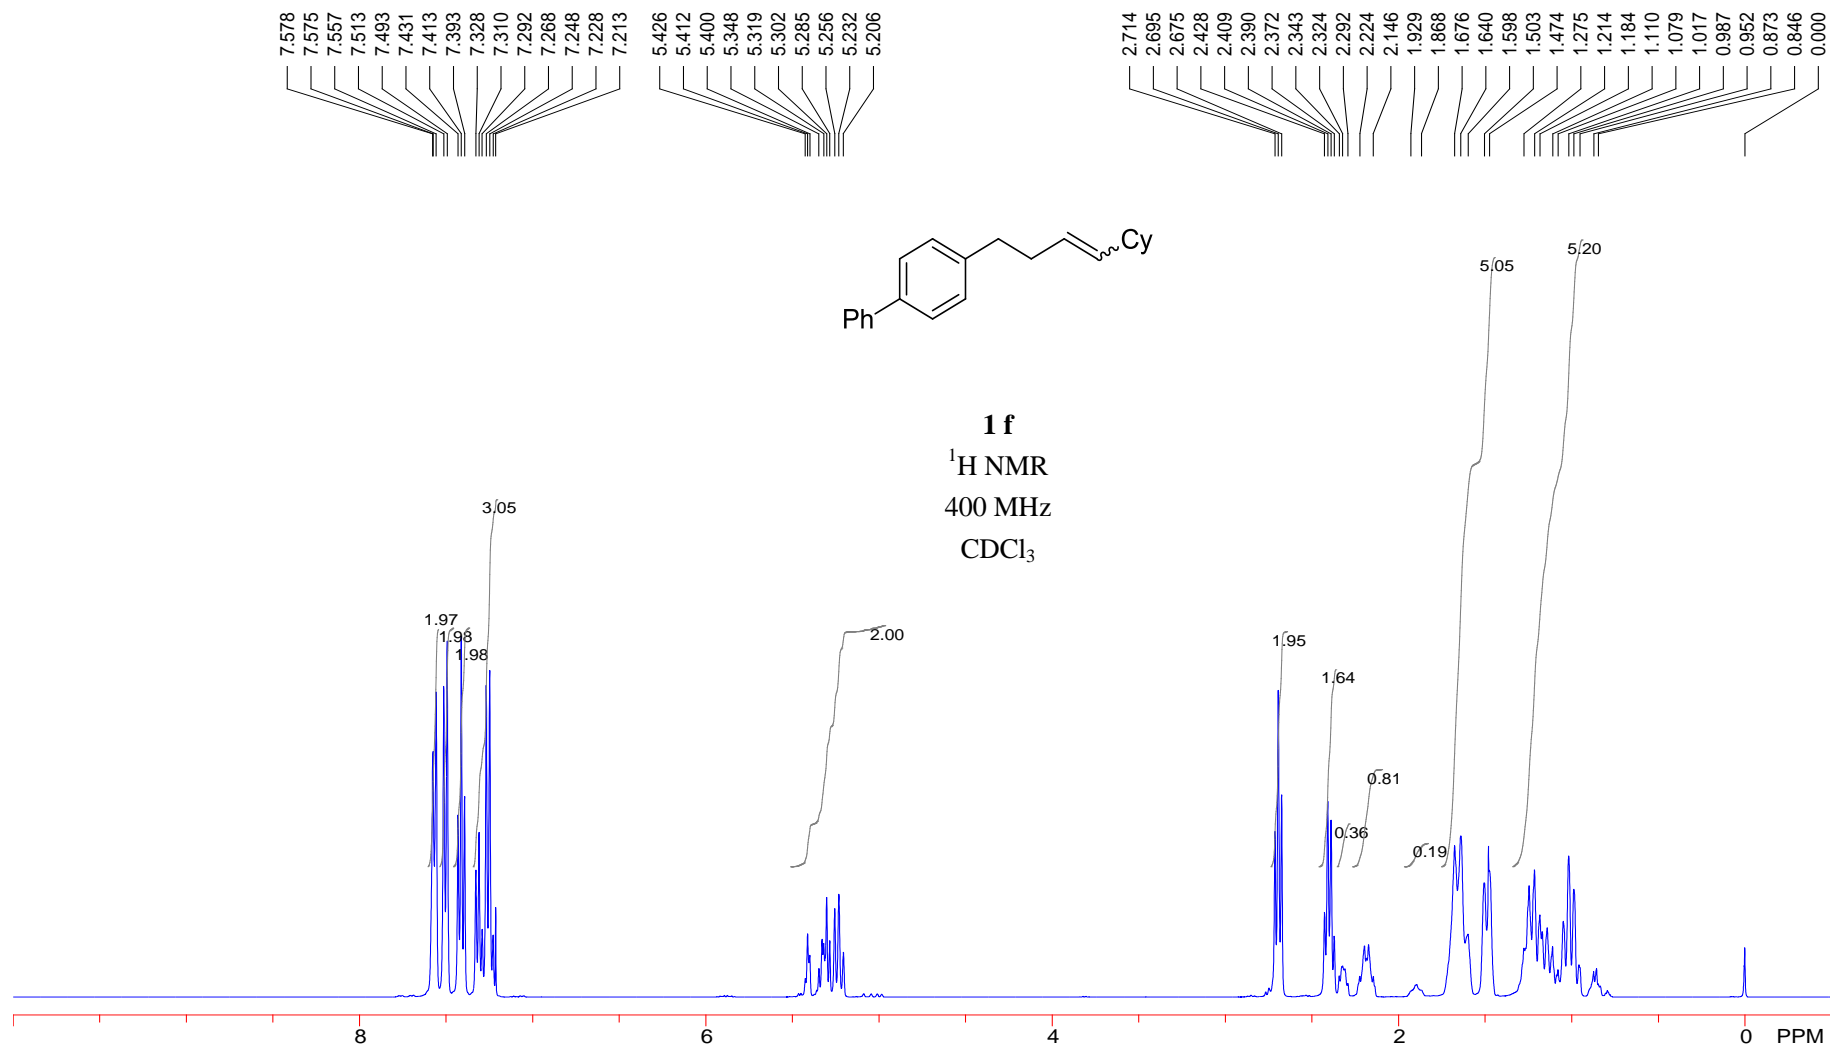

Supplementary Figure 59. <sup>1</sup>H NMR spectrum for **1f**

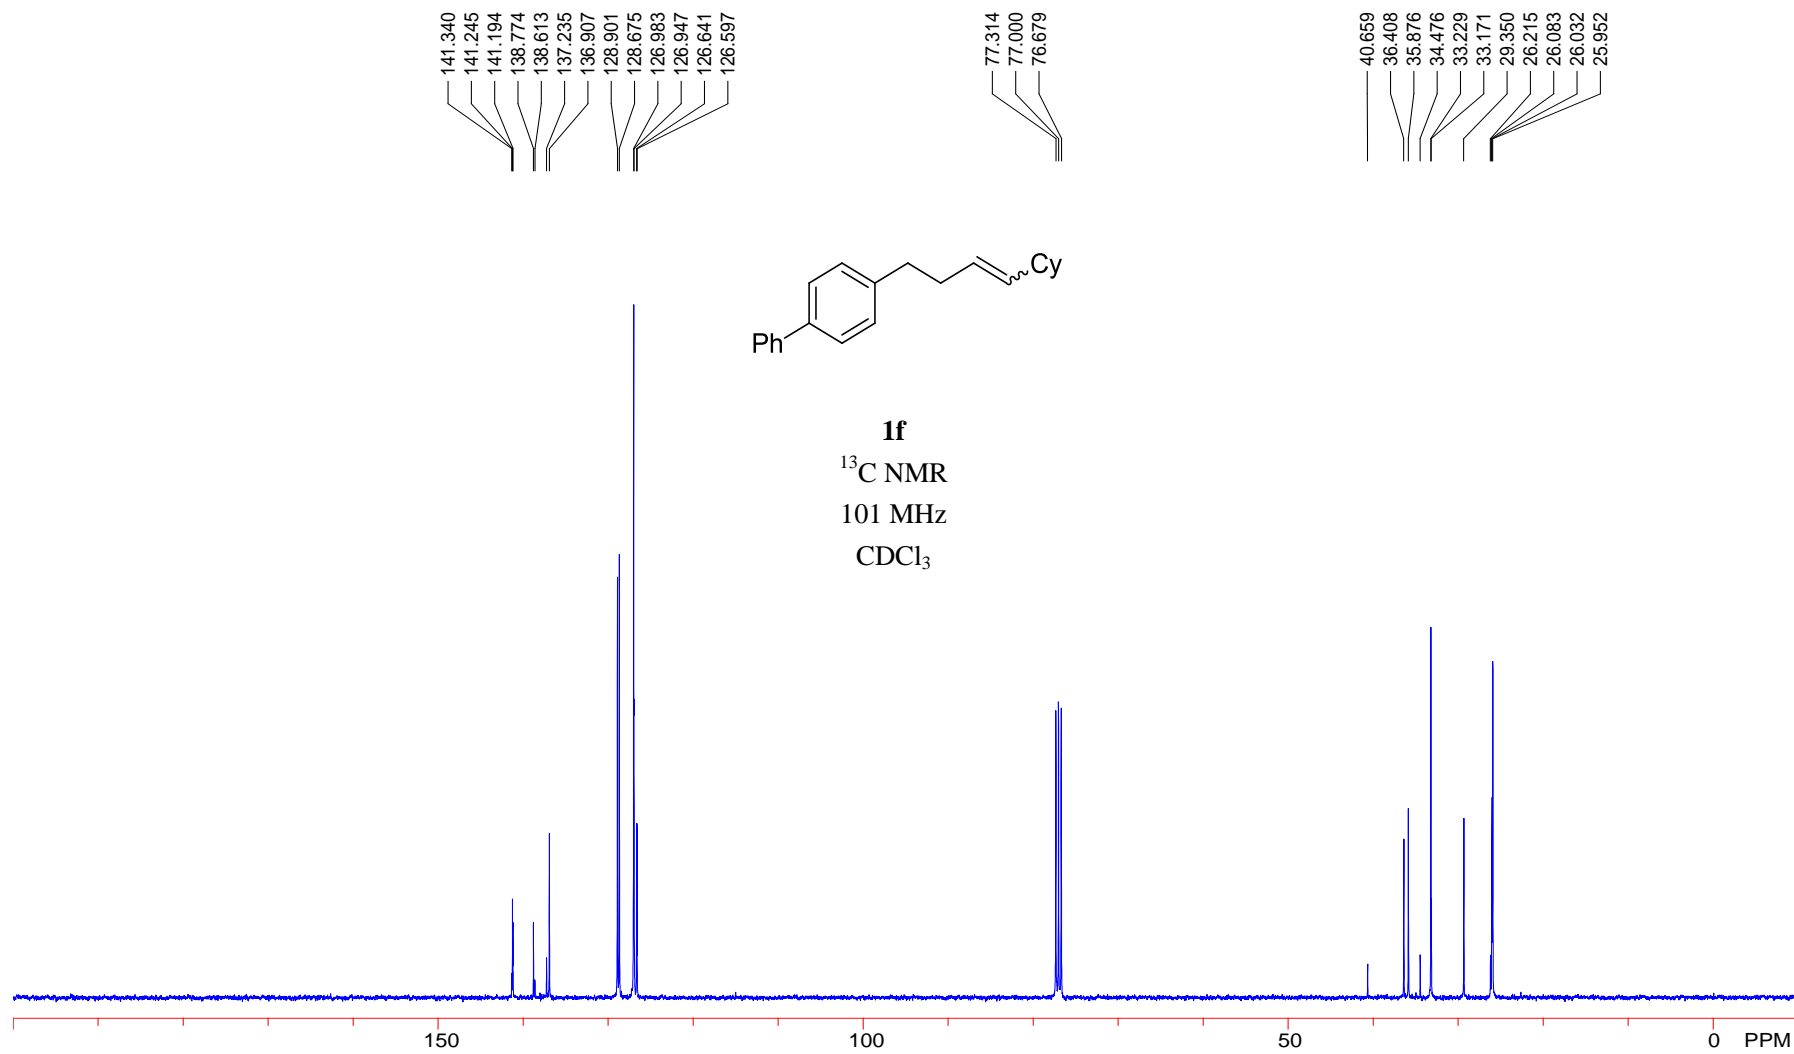

Supplementary Figure 60.  $^{13}\text{C}$  NMR spectrum for **1f**

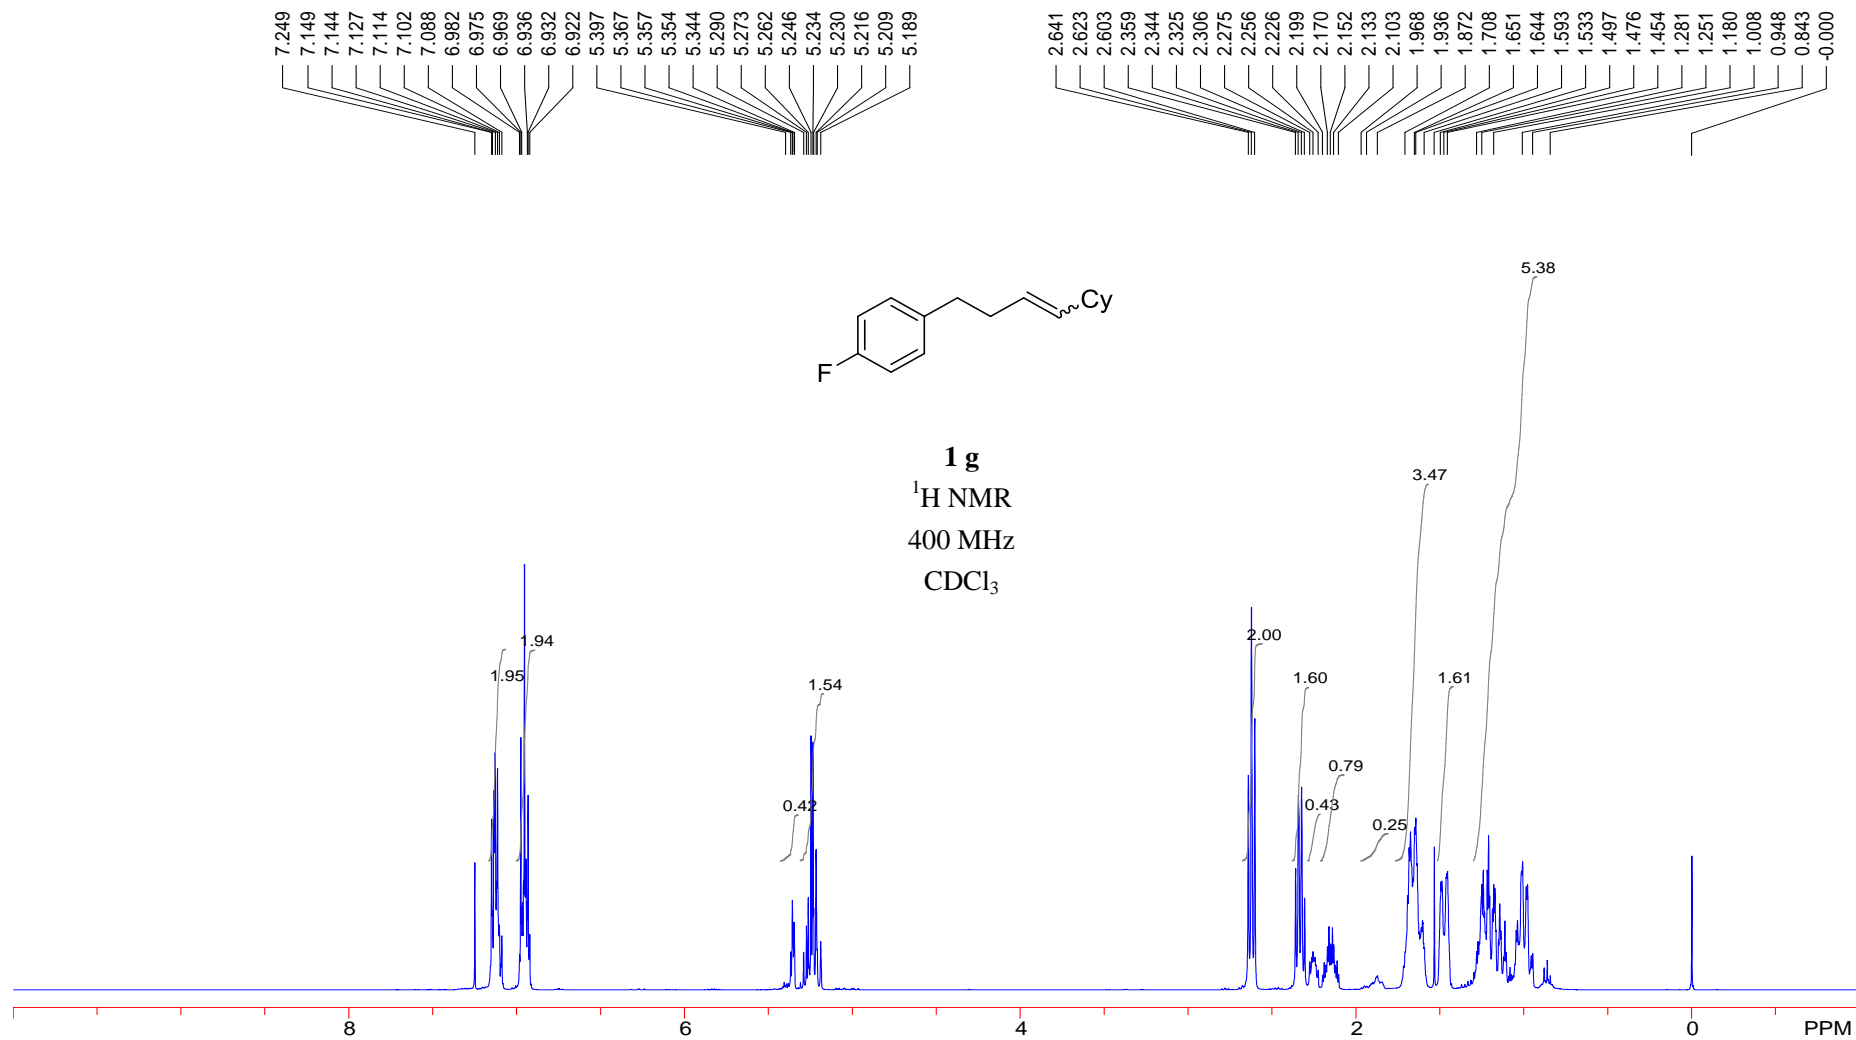

Supplementary Figure 61. <sup>1</sup>H NMR spectrum for **1g**

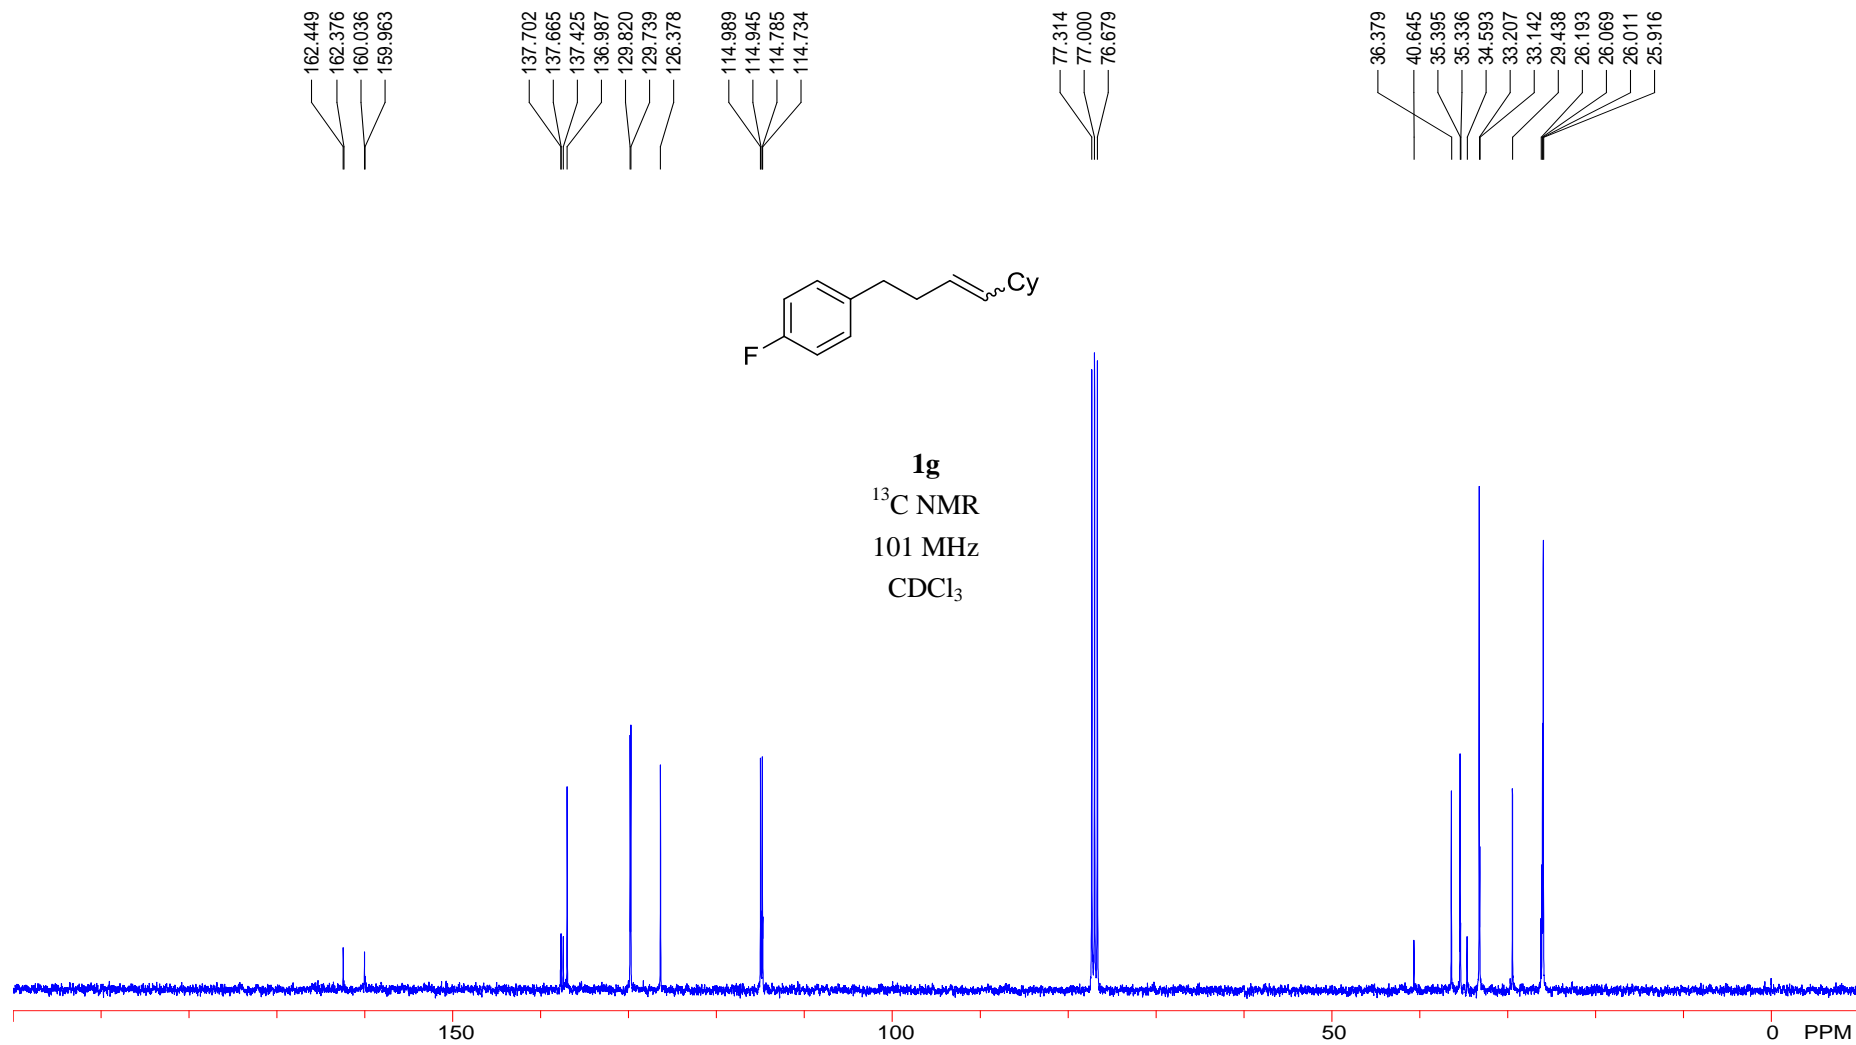

Supplementary Figure 62.  $^{13}\text{C}$  NMR spectrum for **1g**

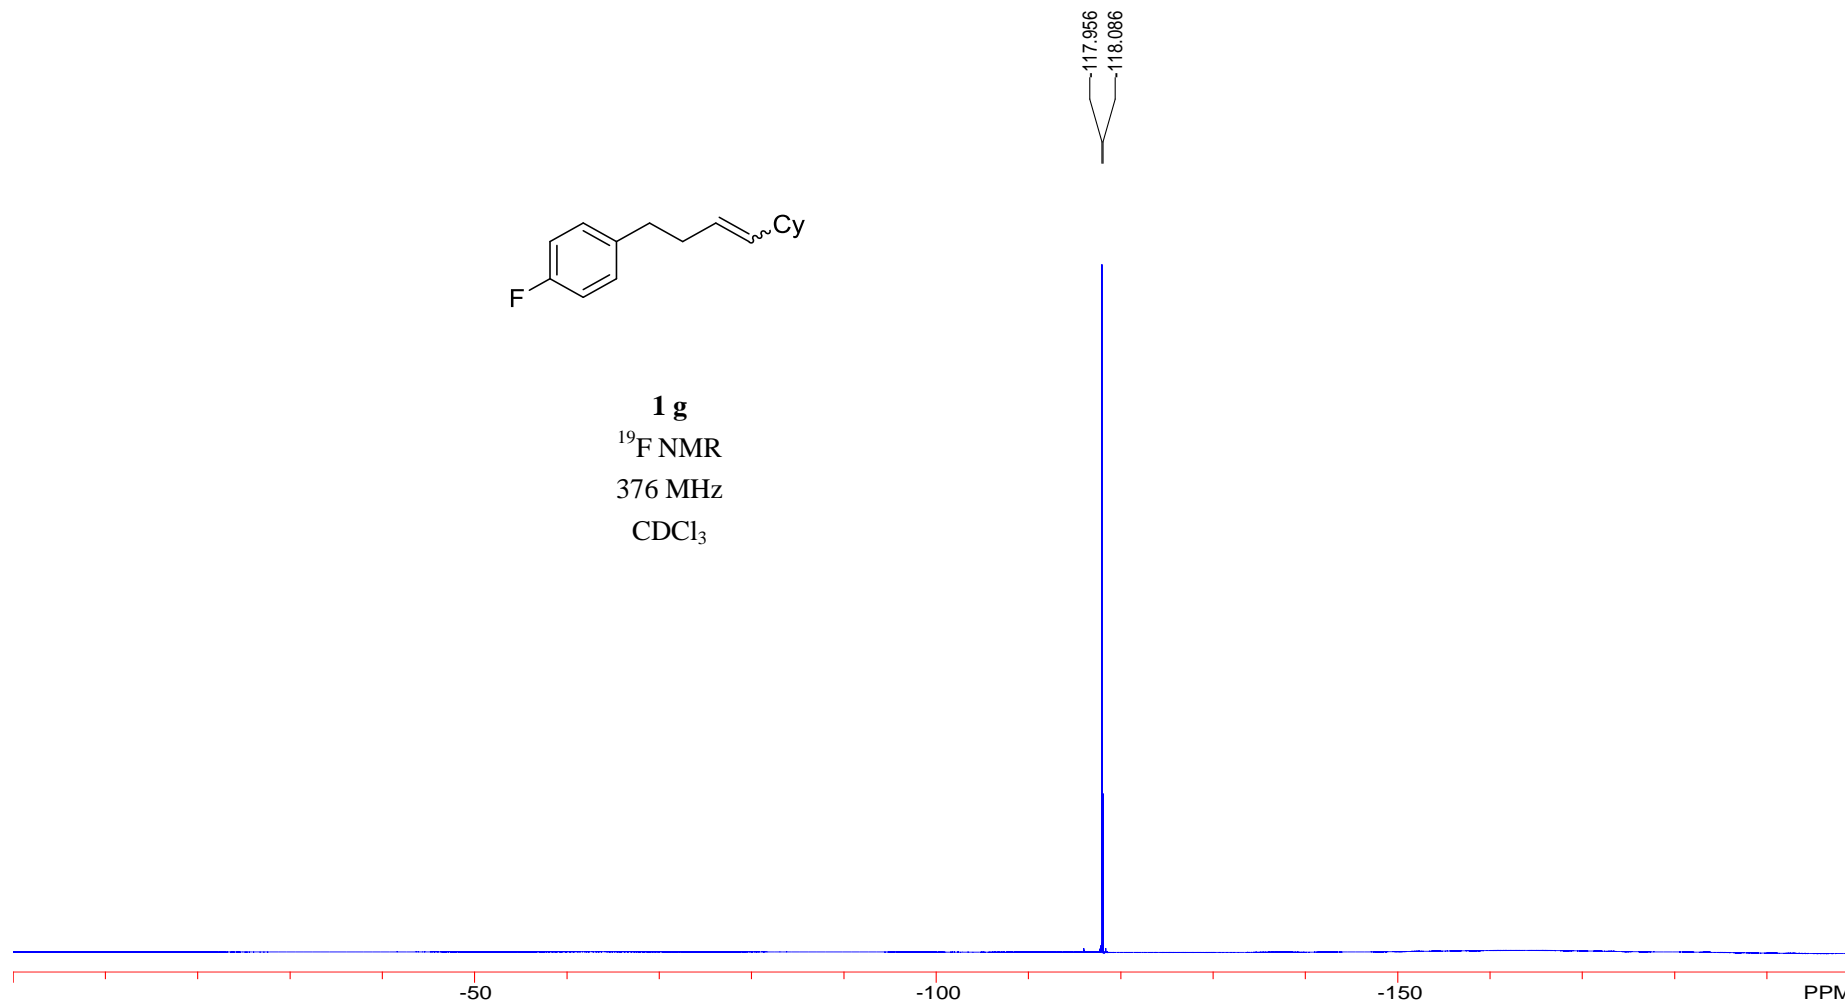

**Supplementary Figure 63.**  $^{19}\text{F}$  NMR spectrum for **1g**



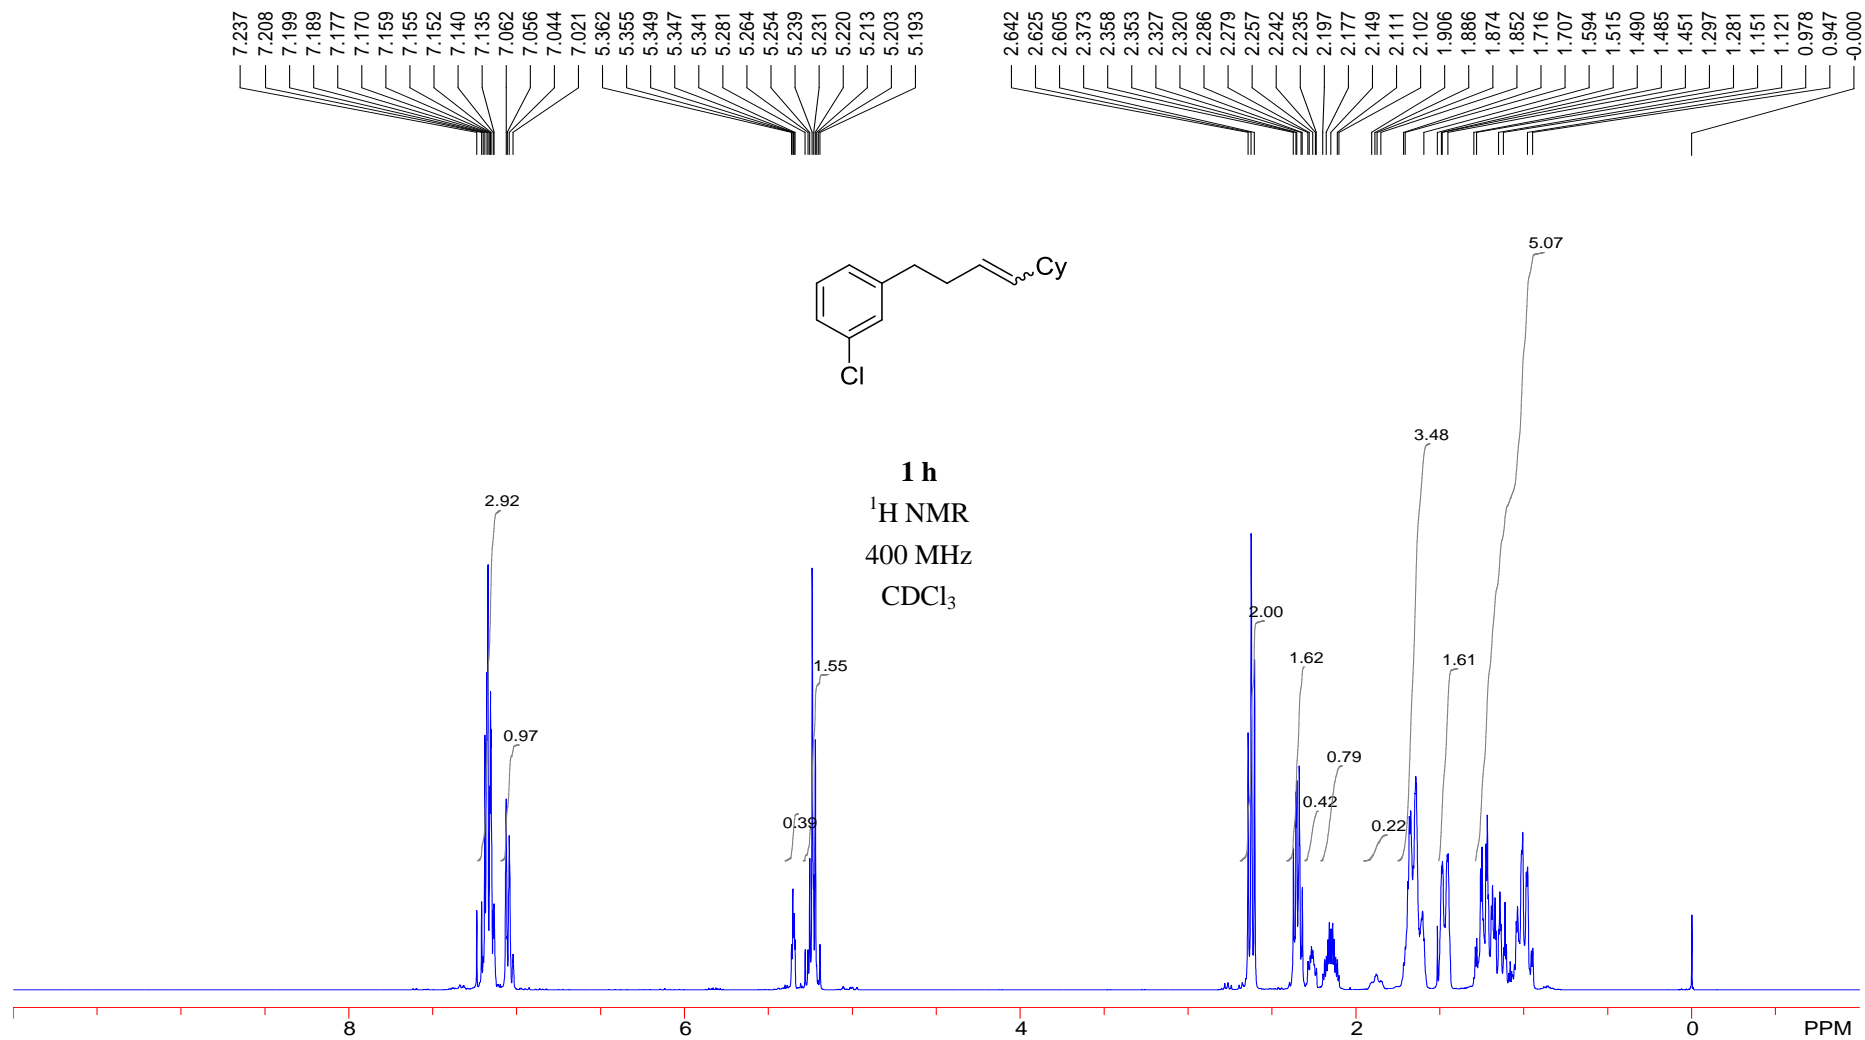

Supplementary Figure 64. <sup>1</sup>H NMR spectrum for **1h**

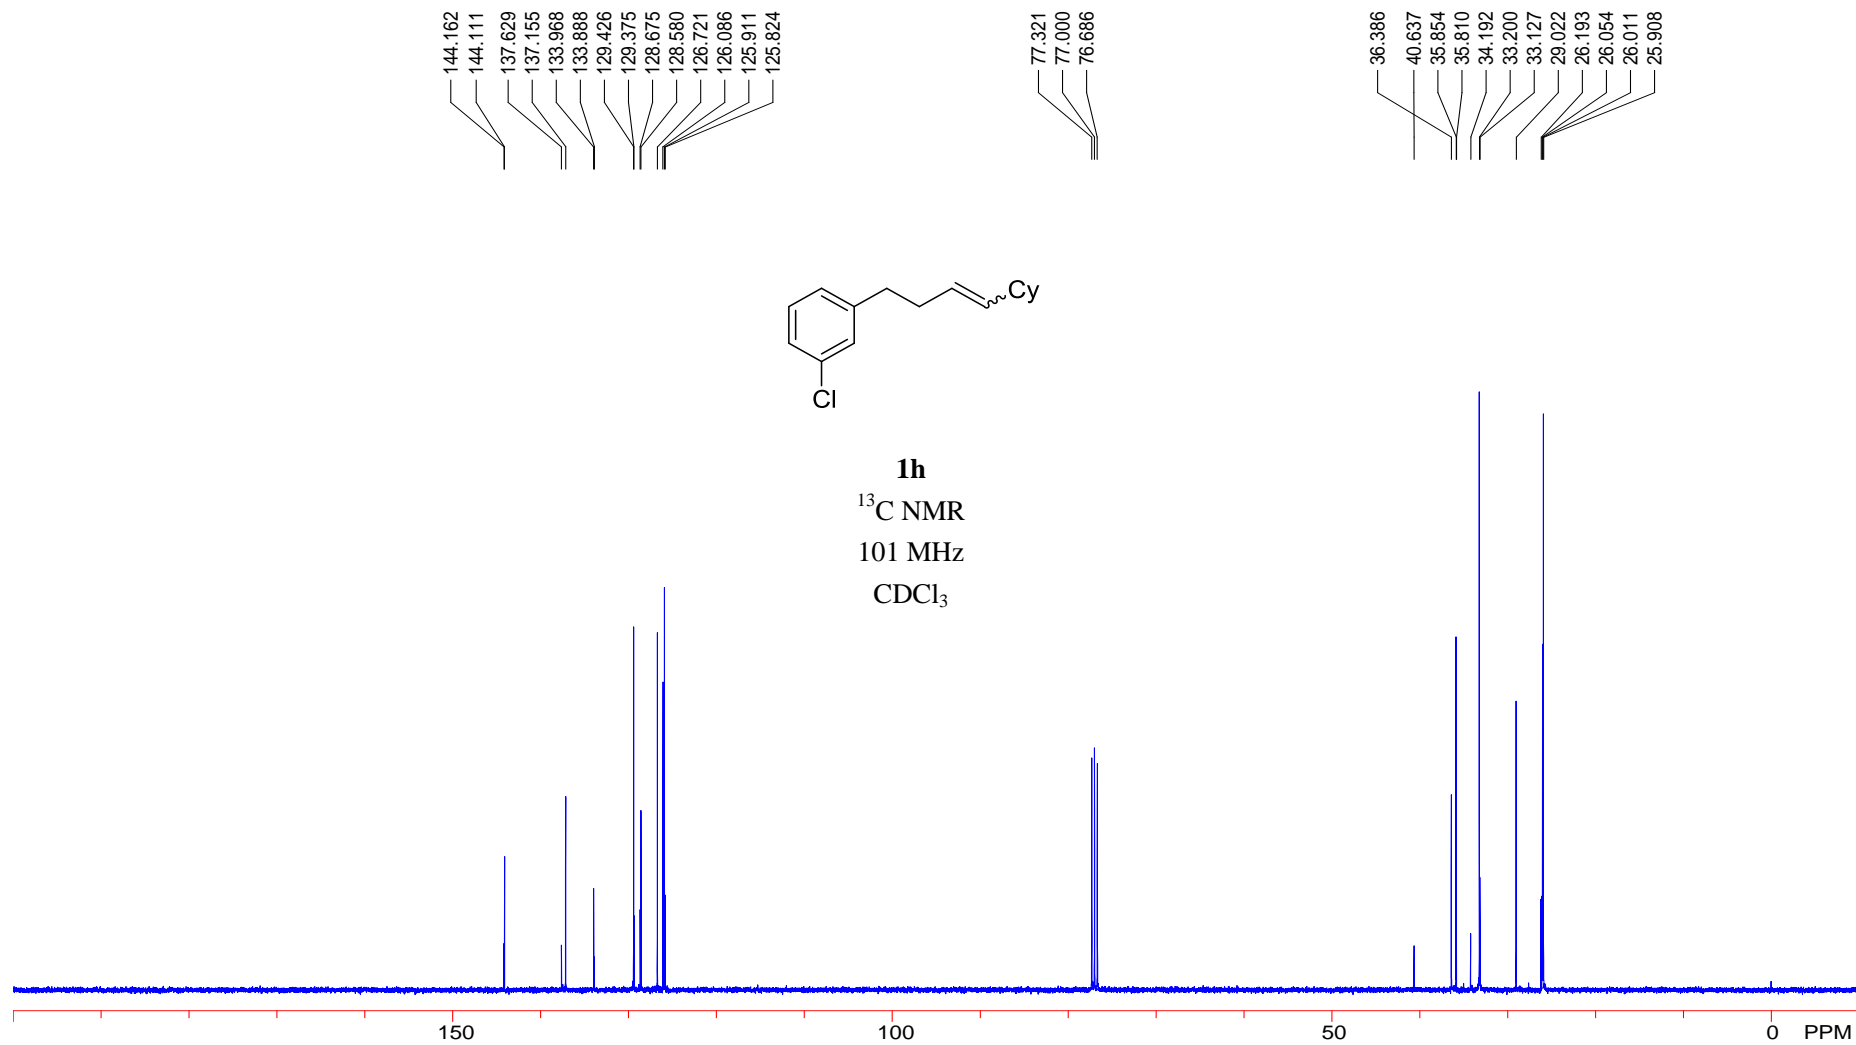

Supplementary Figure 65.  $^{13}\text{C}$  NMR spectrum for **1h**

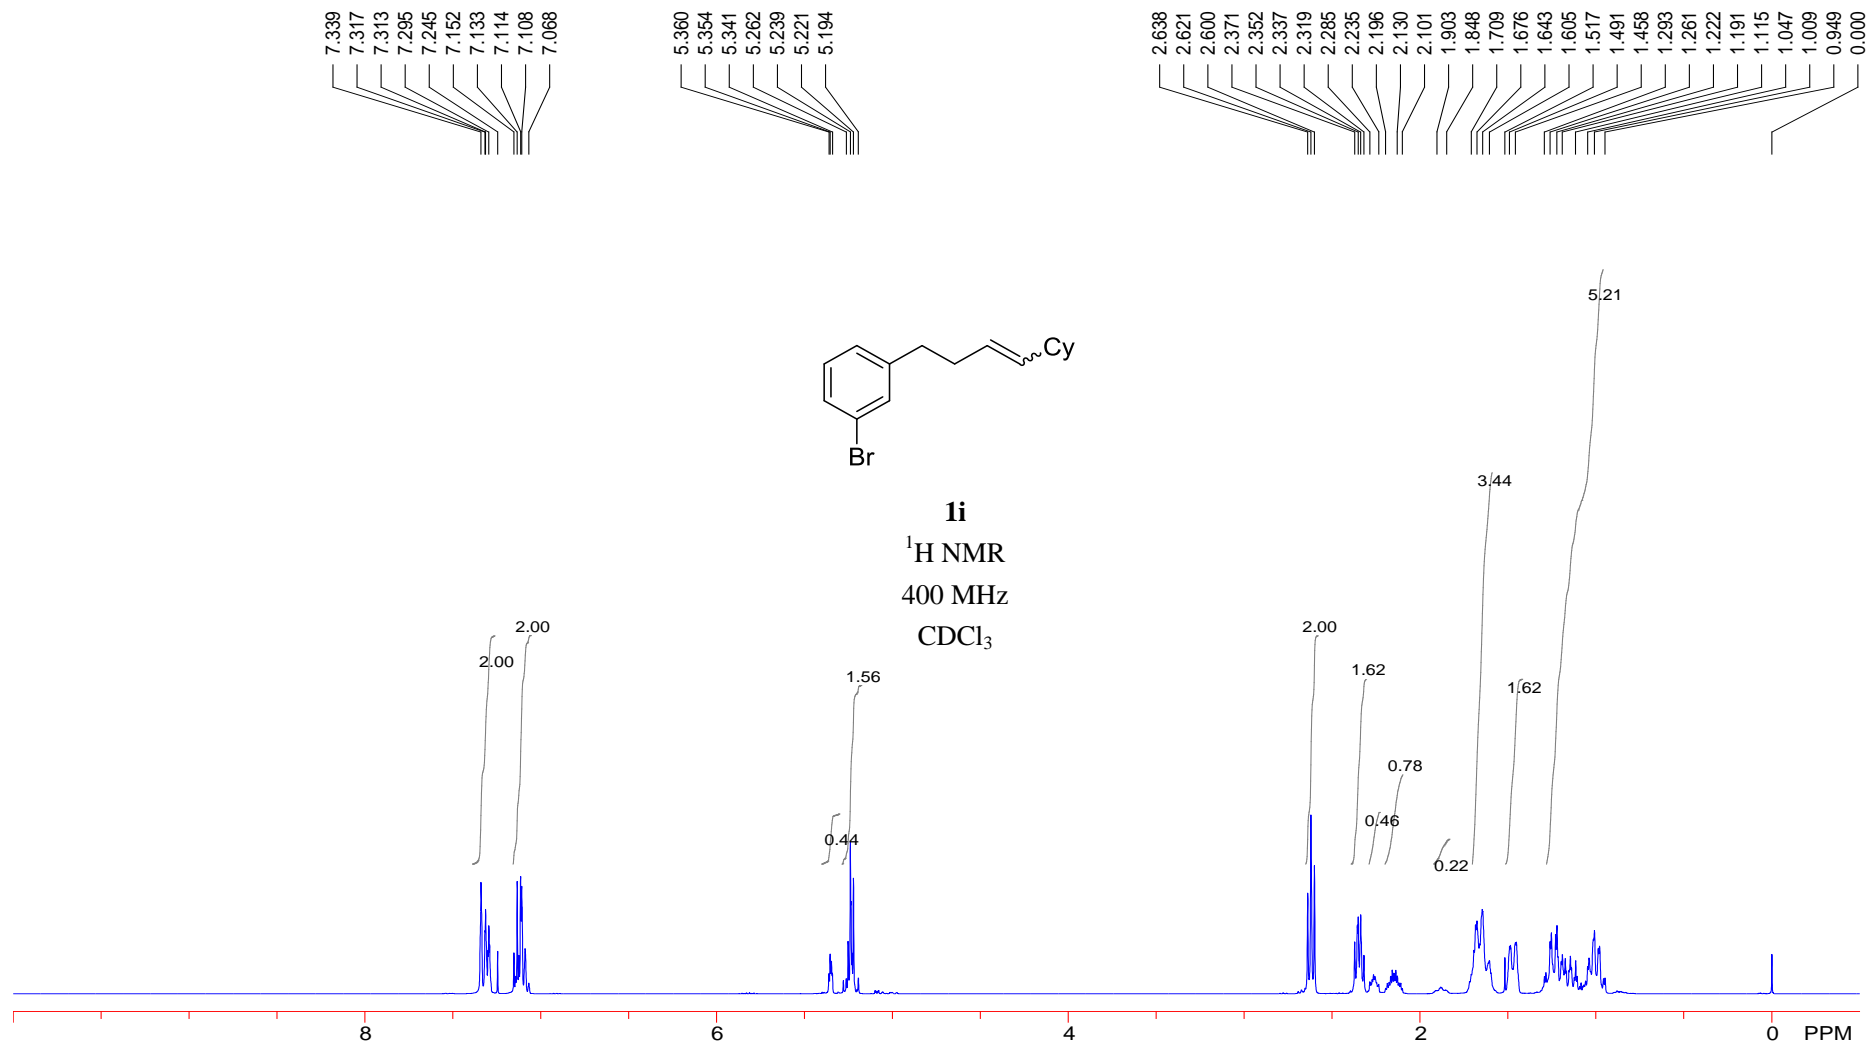

Supplementary Figure 66. <sup>1</sup>H NMR spectrum for **1i**

144.432  
137.665  
137.184  
131.613  
131.497  
129.747  
129.703  
128.843  
128.755  
127.195  
126.057  
122.302  
77.321  
77.000  
76.686  
36.386  
40.630  
35.818  
35.781  
34.213  
33.200  
33.127  
29.037  
26.193  
26.054  
26.018  
25.916

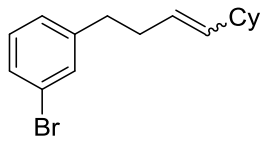

**1i**  
<sup>13</sup>C NMR  
101 MHz  
CDCl<sub>3</sub>

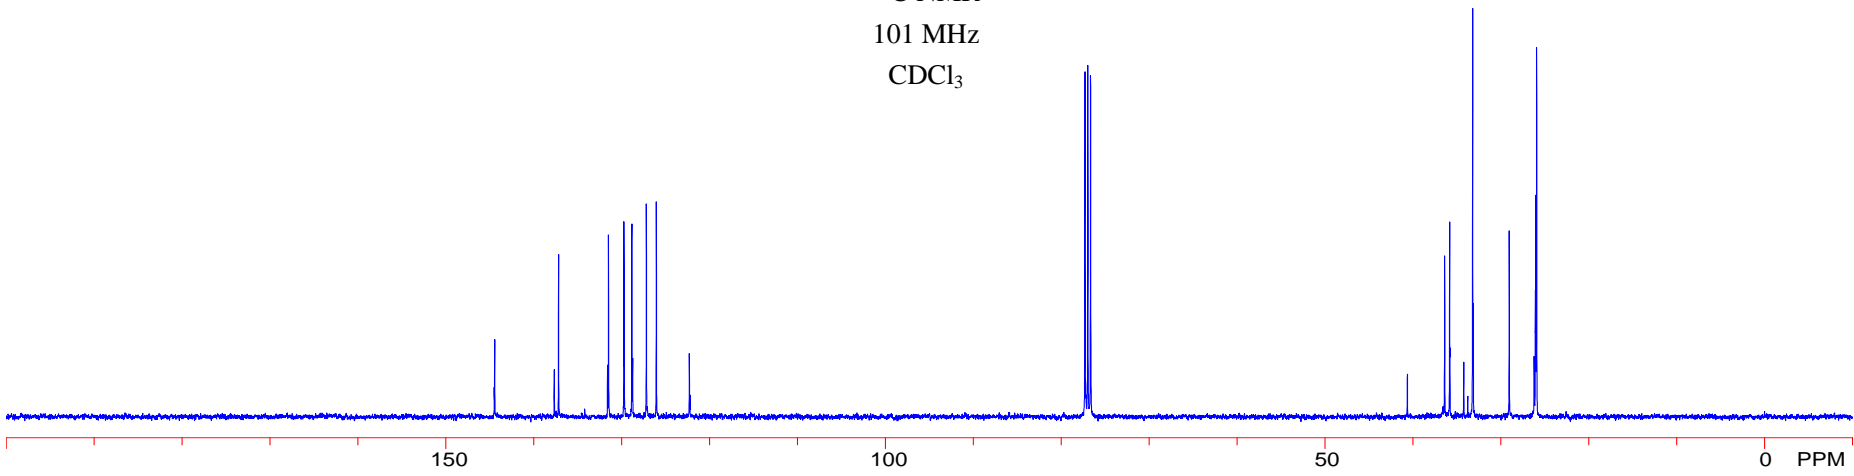

Supplementary Figure 67. <sup>13</sup>C NMR spectrum for **1i**

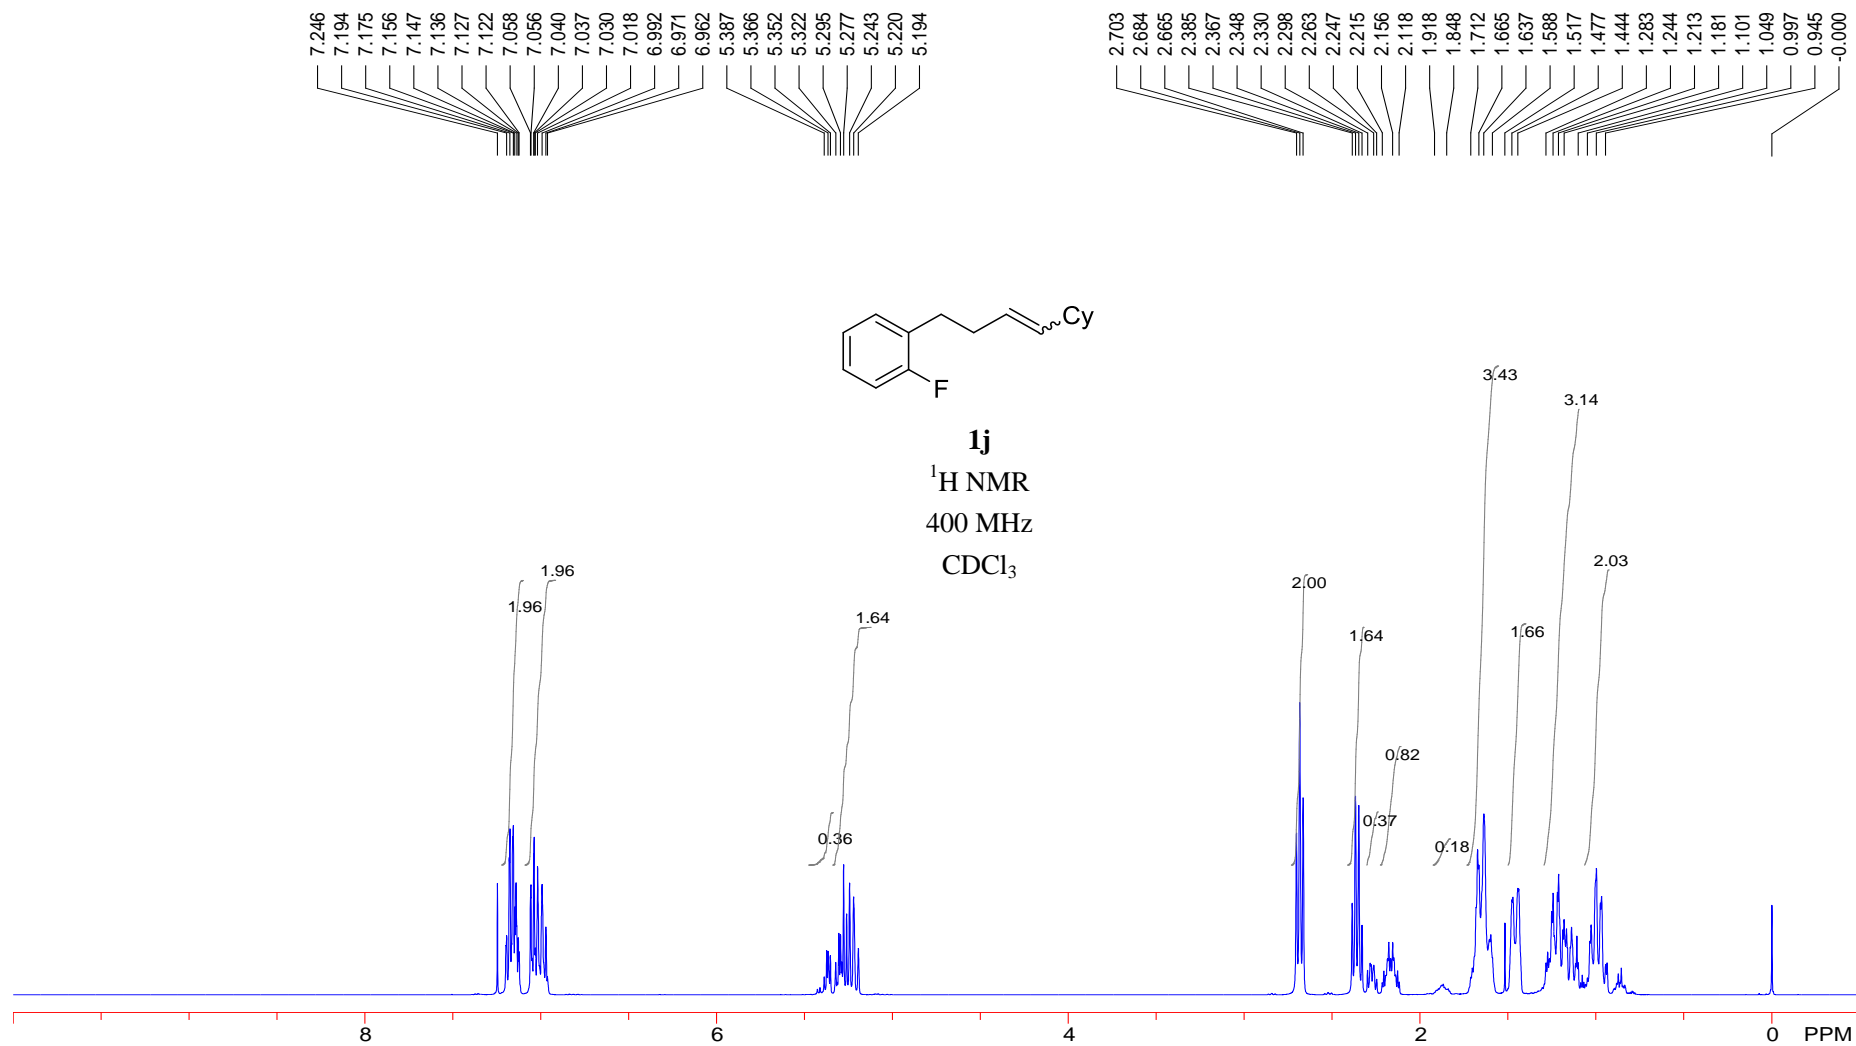

Supplementary Figure 68. <sup>1</sup>H NMR spectrum for **1j**

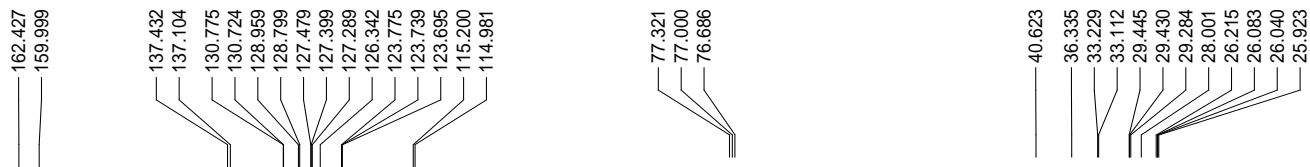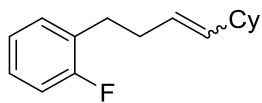

**1j**  
 $^{13}\text{C}$  NMR  
 101 MHz  
 $\text{CDCl}_3$

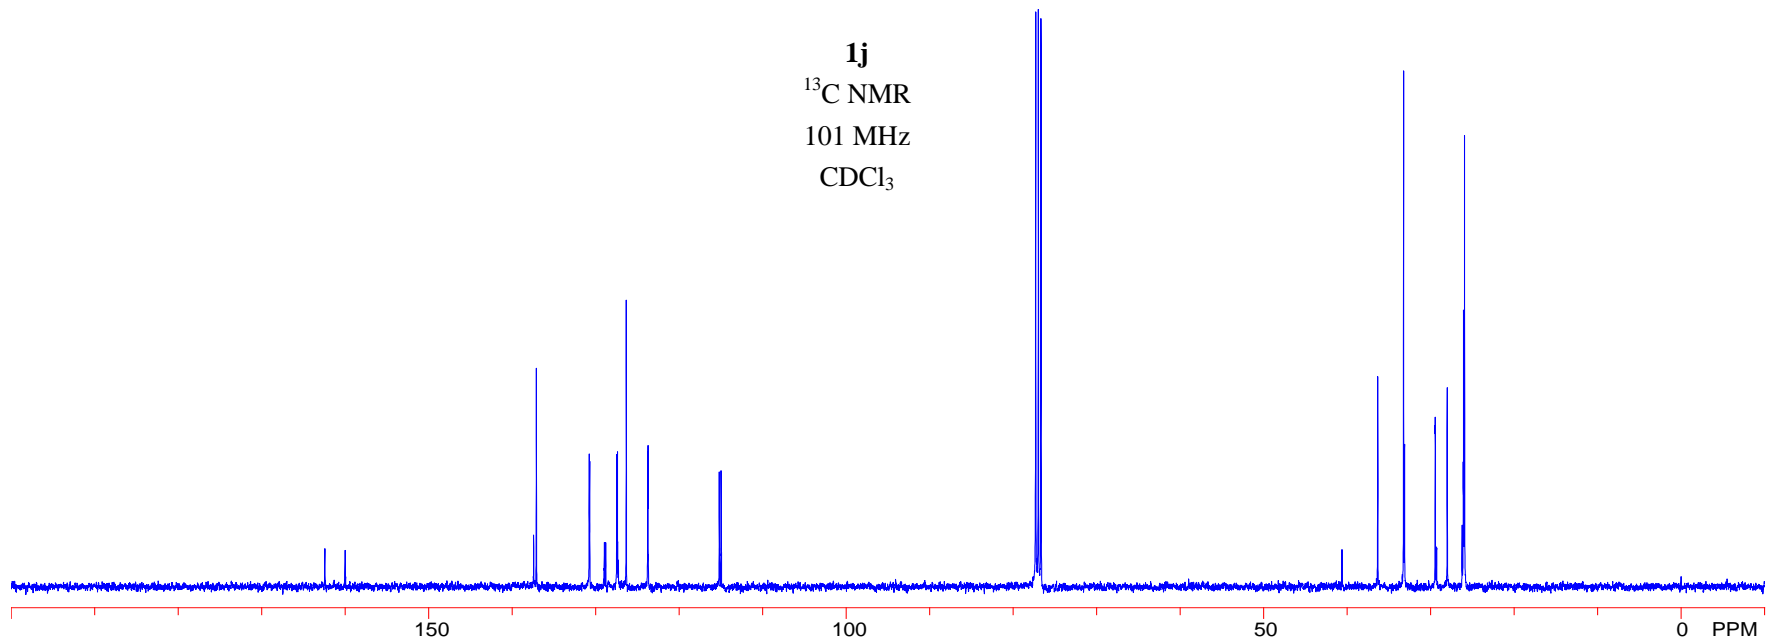

**Supplementary Figure 69.**  $^{13}\text{C}$  NMR spectrum for **1j**

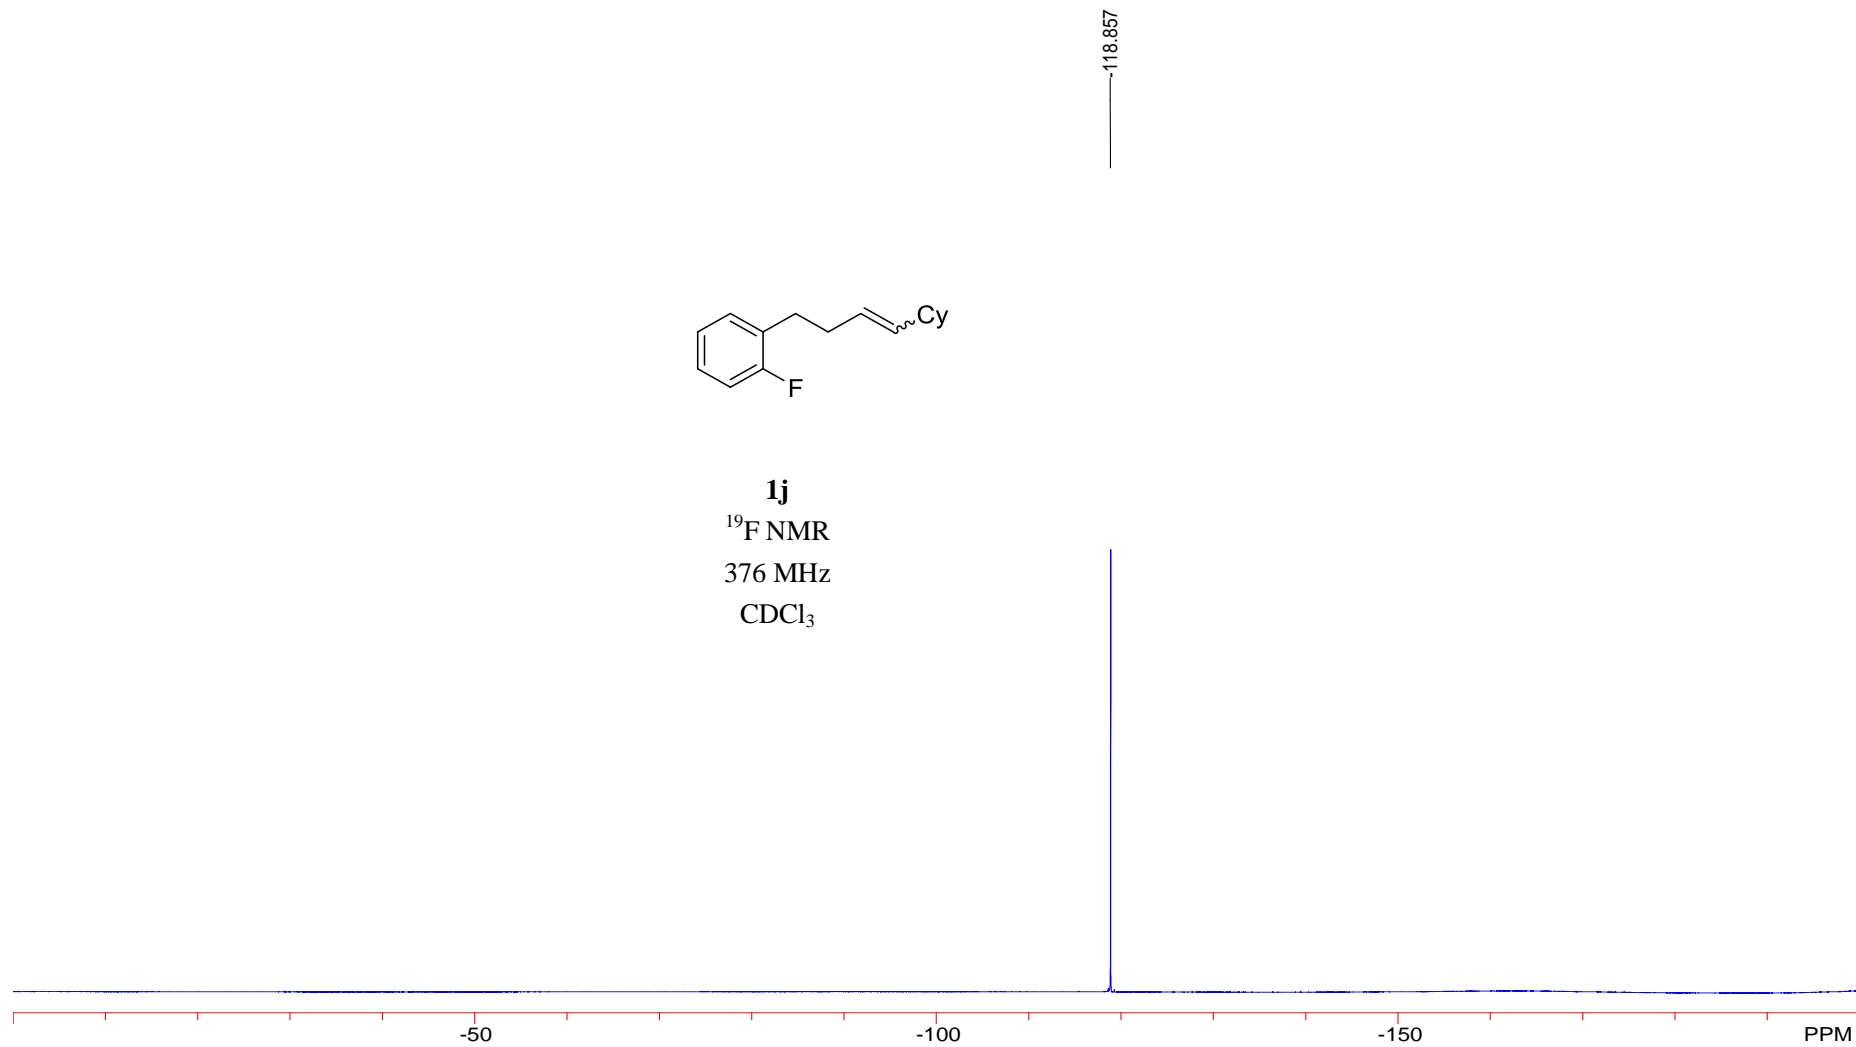

**Supplementary Figure 70.** <sup>19</sup>F NMR spectrum for **1j**

7.215  
7.121  
7.106  
7.099  
7.083

5.403  
5.392  
5.366  
5.348  
5.340  
5.332  
5.321  
5.304  
5.256  
5.231  
5.206

2.664  
2.635  
2.614  
2.345  
2.315  
2.264  
2.239  
2.225  
2.211  
2.186  
2.159  
1.682  
1.655  
1.606  
1.526  
1.496  
1.248  
1.216  
1.179  
1.150  
1.119  
1.087  
1.058  
1.028  
0.999  
0.976  
0.968  
-0.000

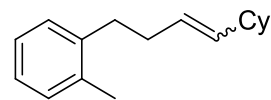

**1k**  
<sup>1</sup>H NMR  
400 MHz  
CDCl<sub>3</sub>

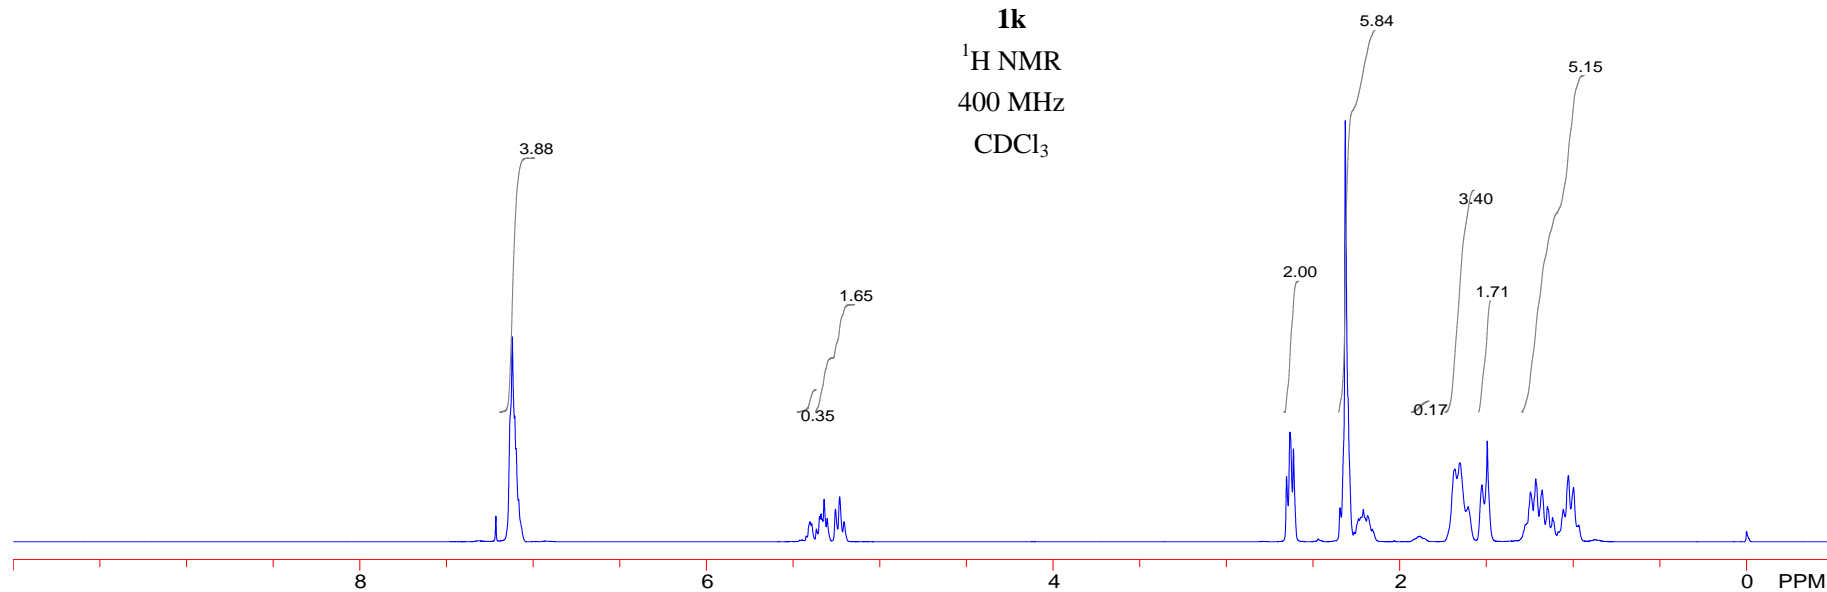

Supplementary Figure 71. <sup>1</sup>H NMR spectrum for **1k**



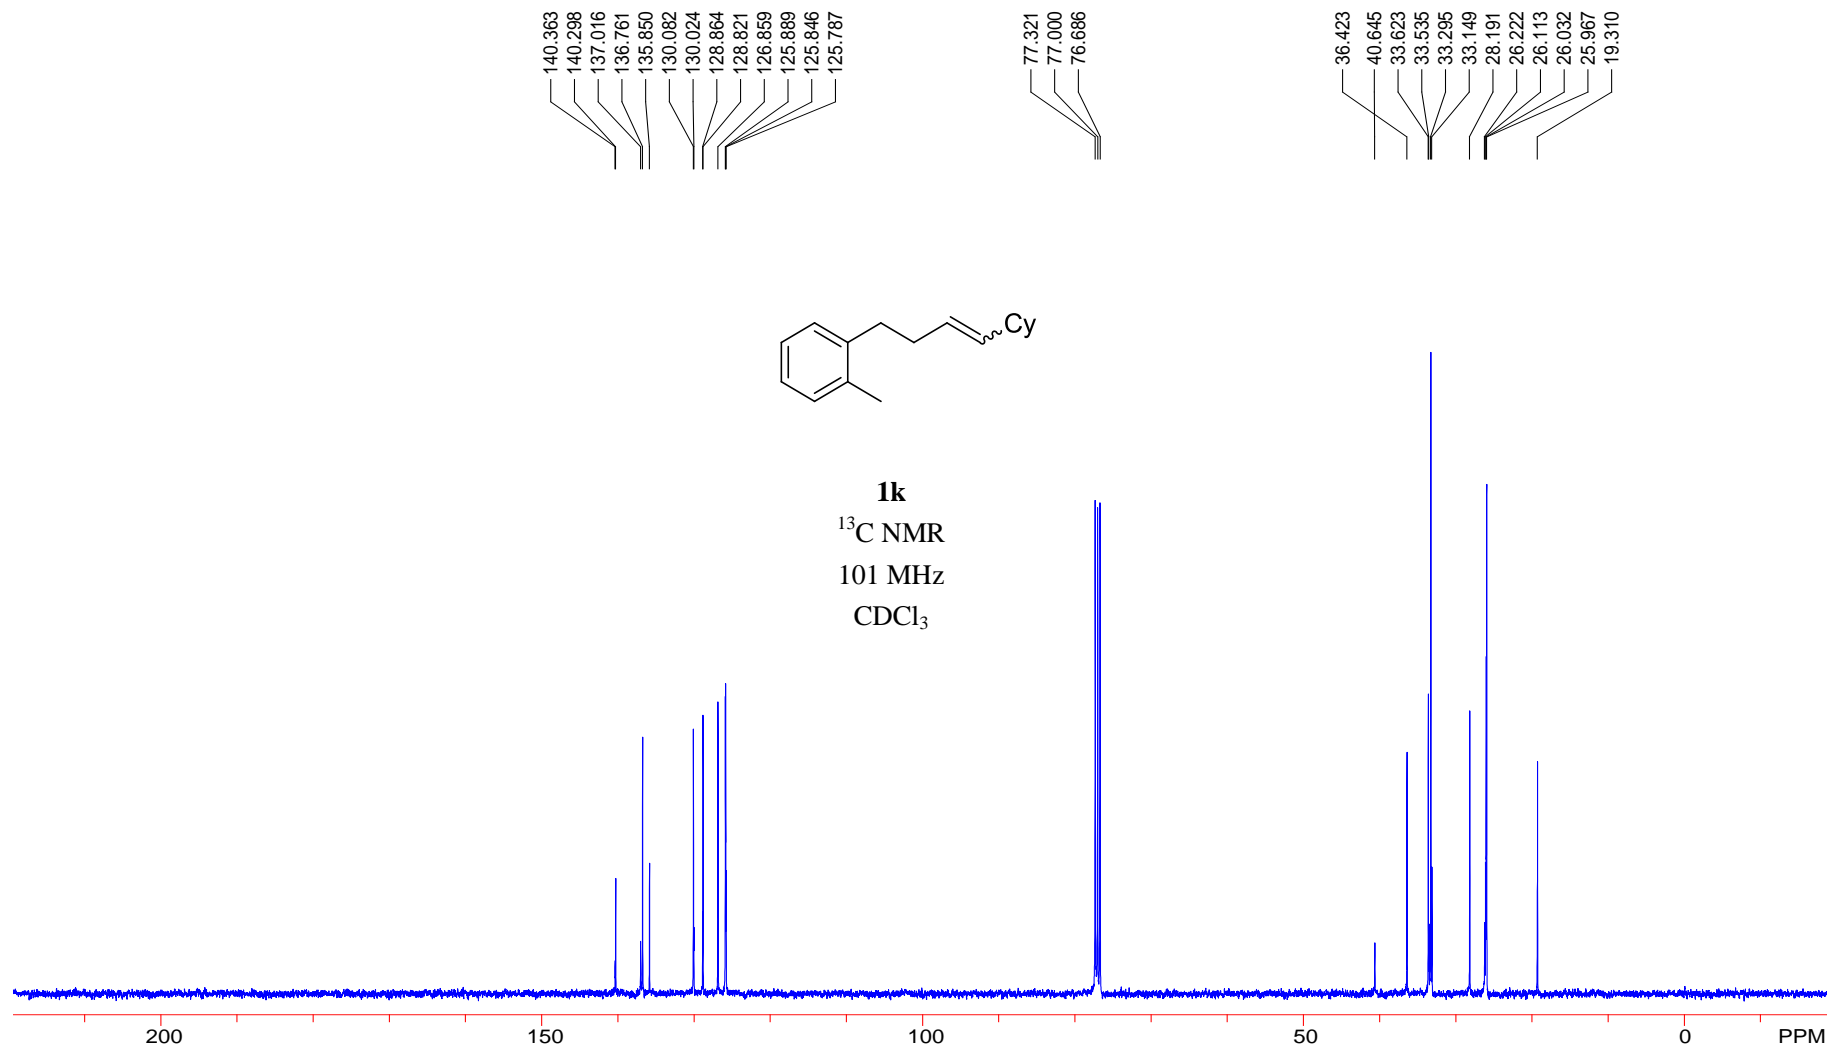

Supplementary Figure 72.  $^{13}\text{C}$  NMR spectrum for **1k**

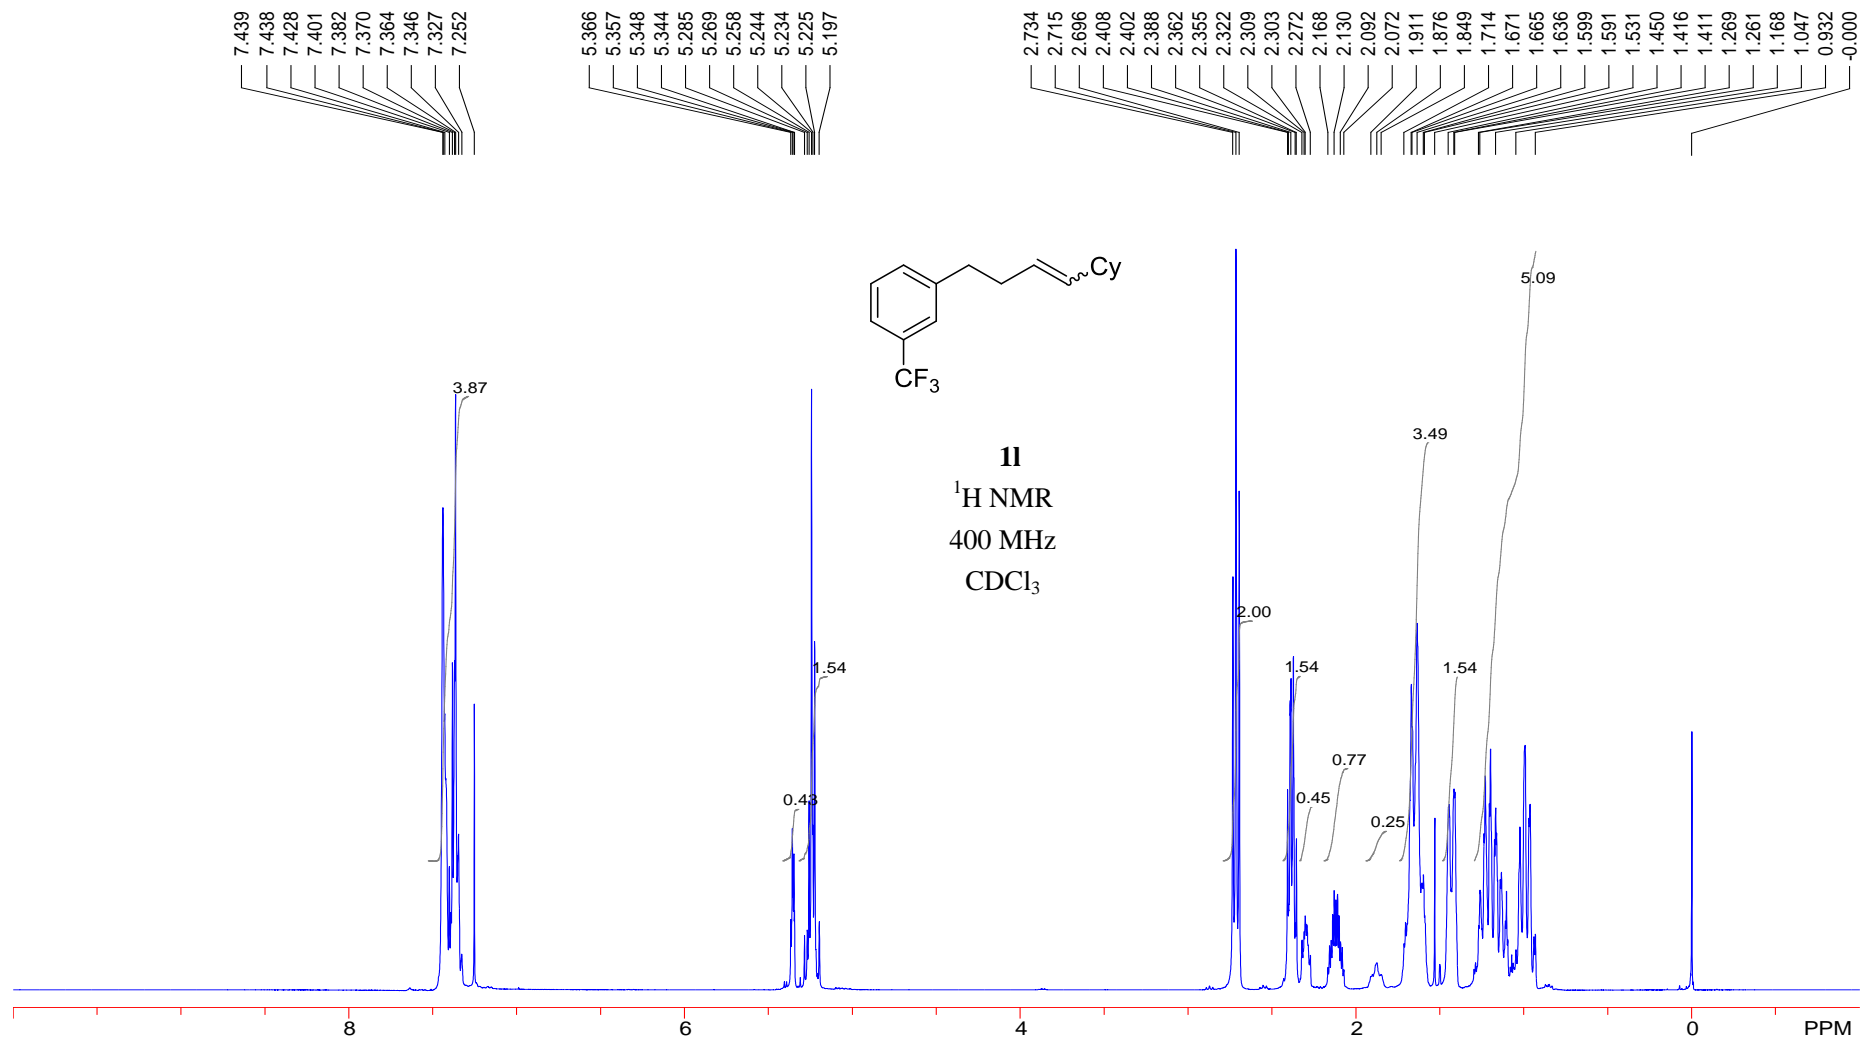

Supplementary Figure 73. <sup>1</sup>H NMR spectrum for **11**

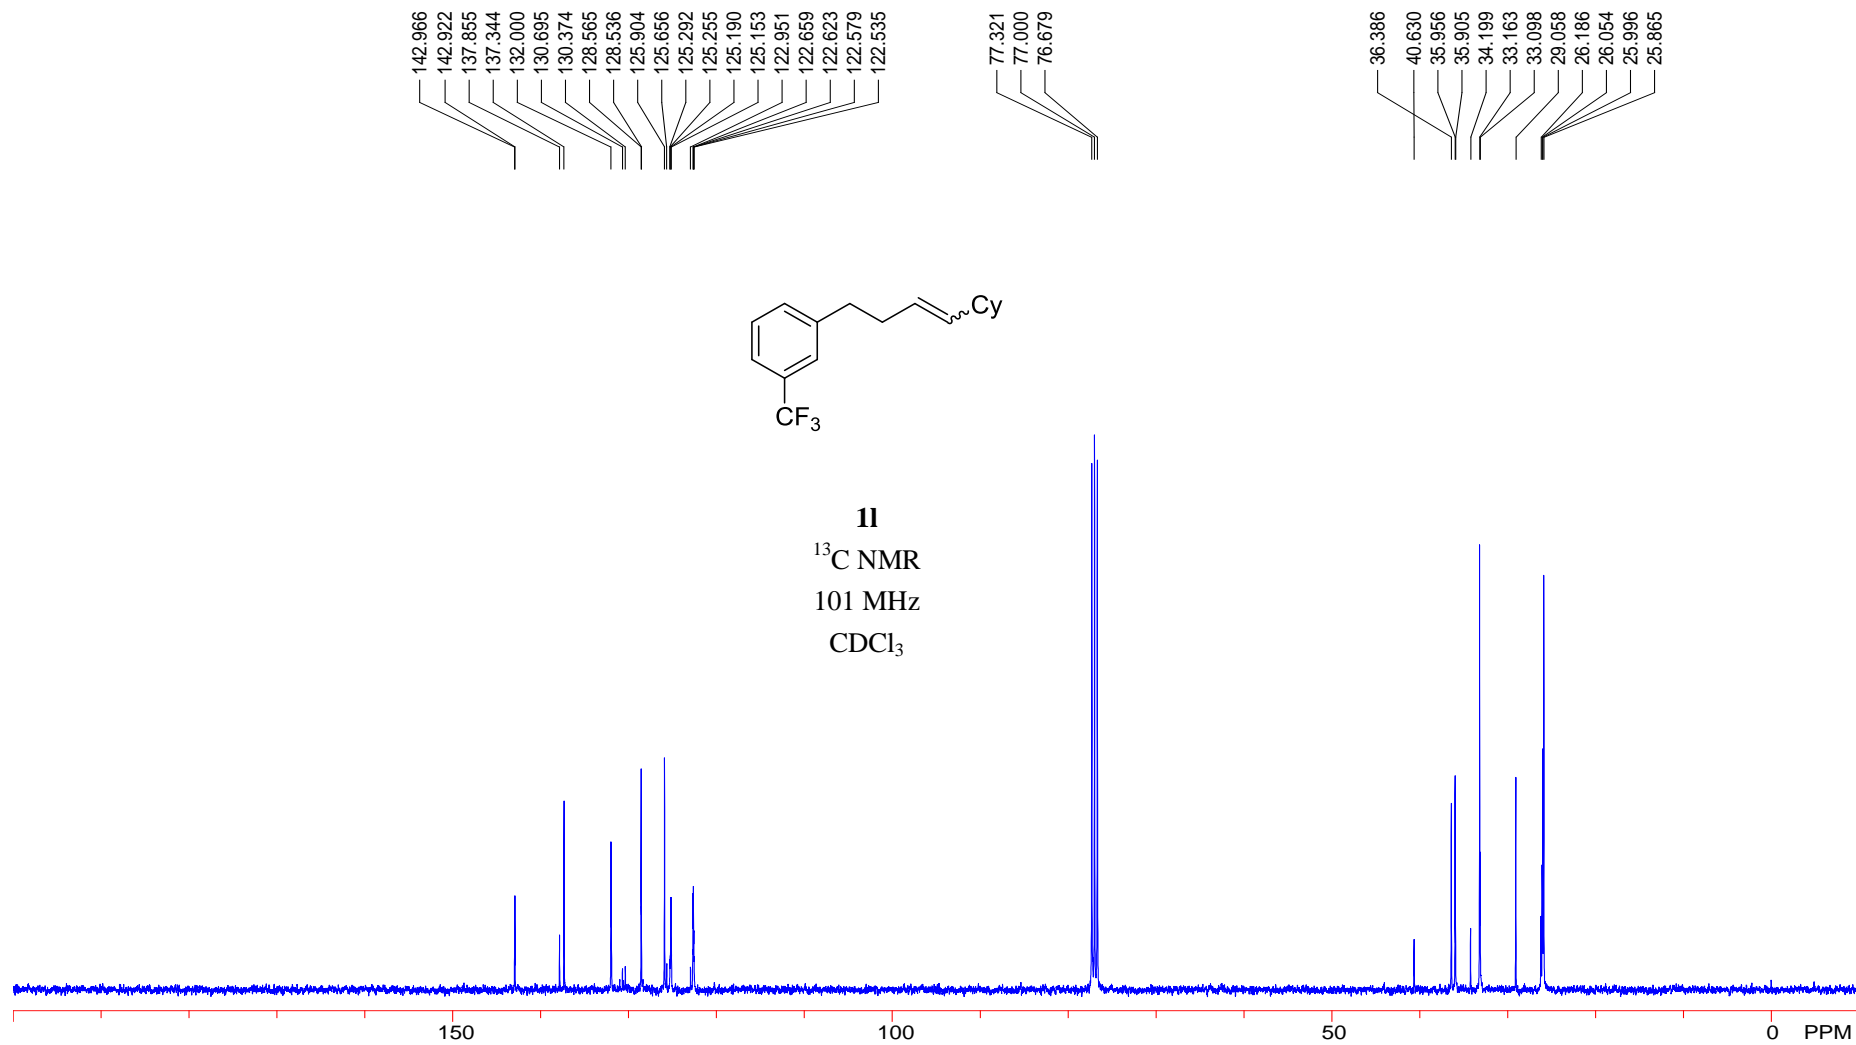

Supplementary Figure 74.  $^{13}\text{C}$  NMR spectrum for **11**

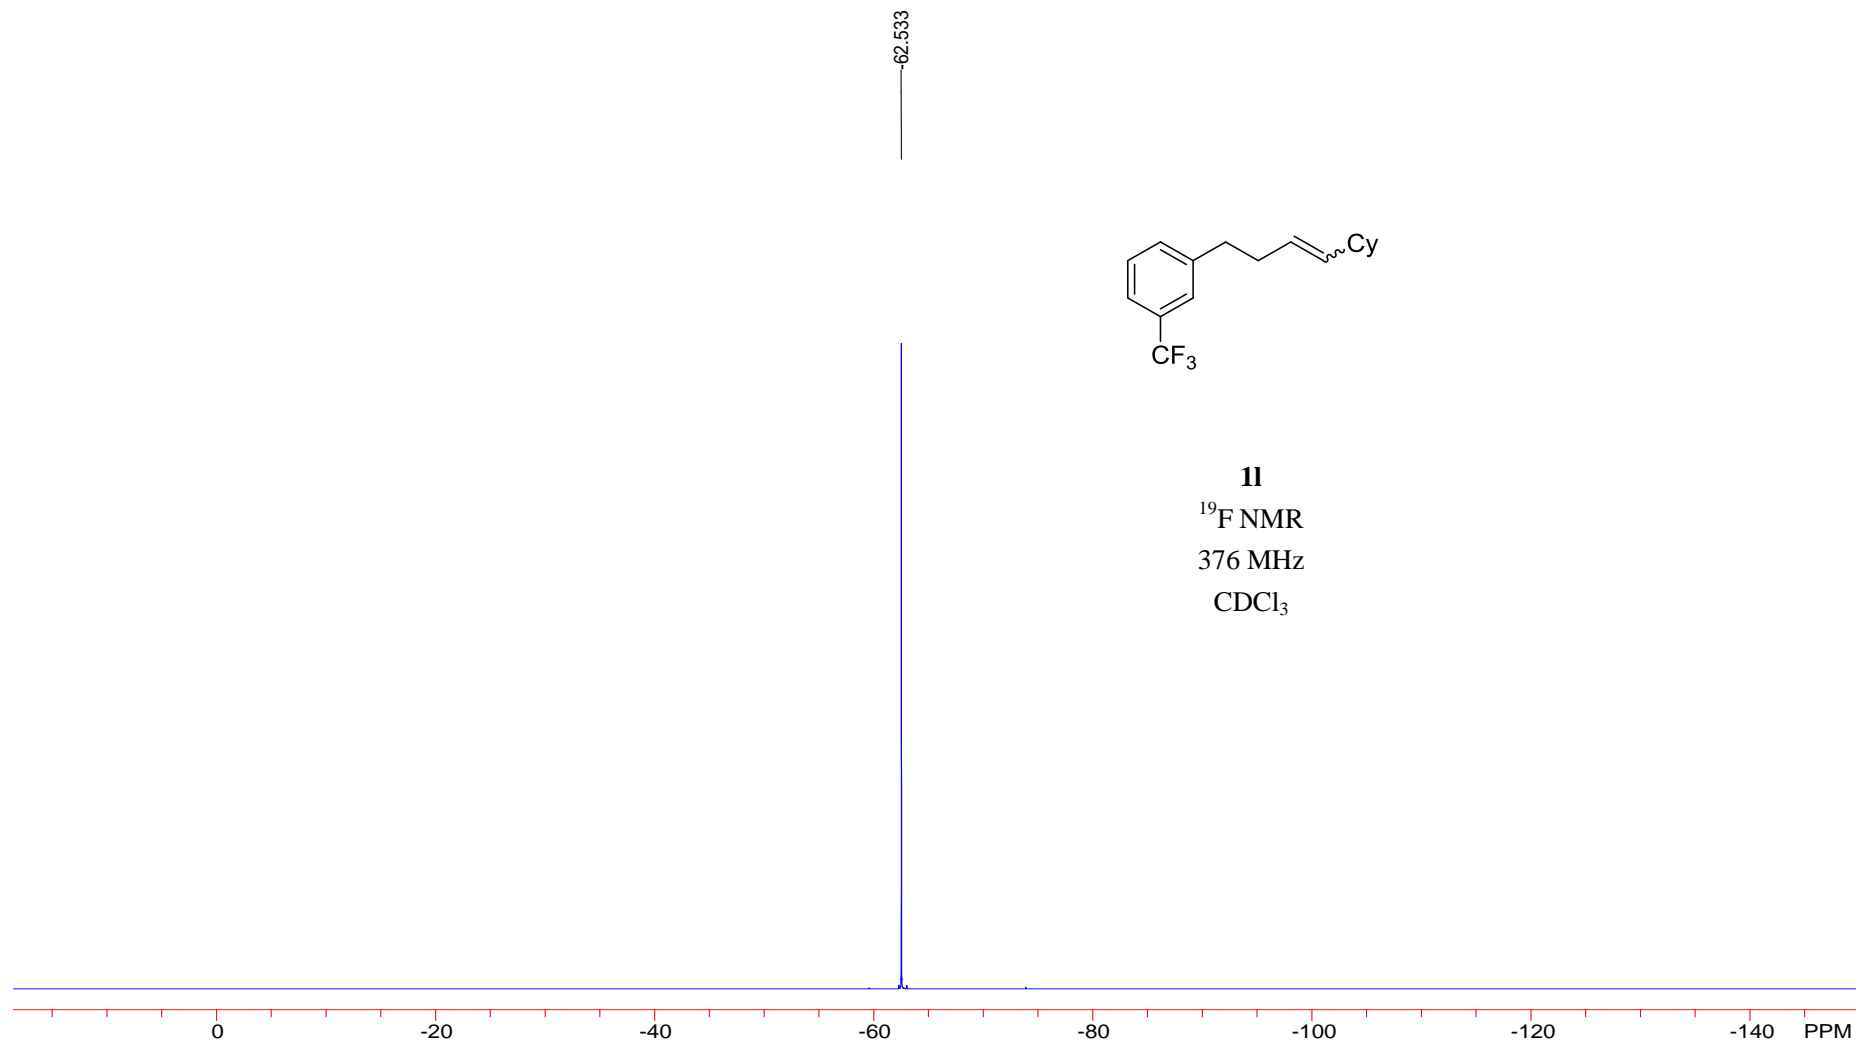

**Supplementary Figure 75.** <sup>19</sup>F NMR spectrum for **11**

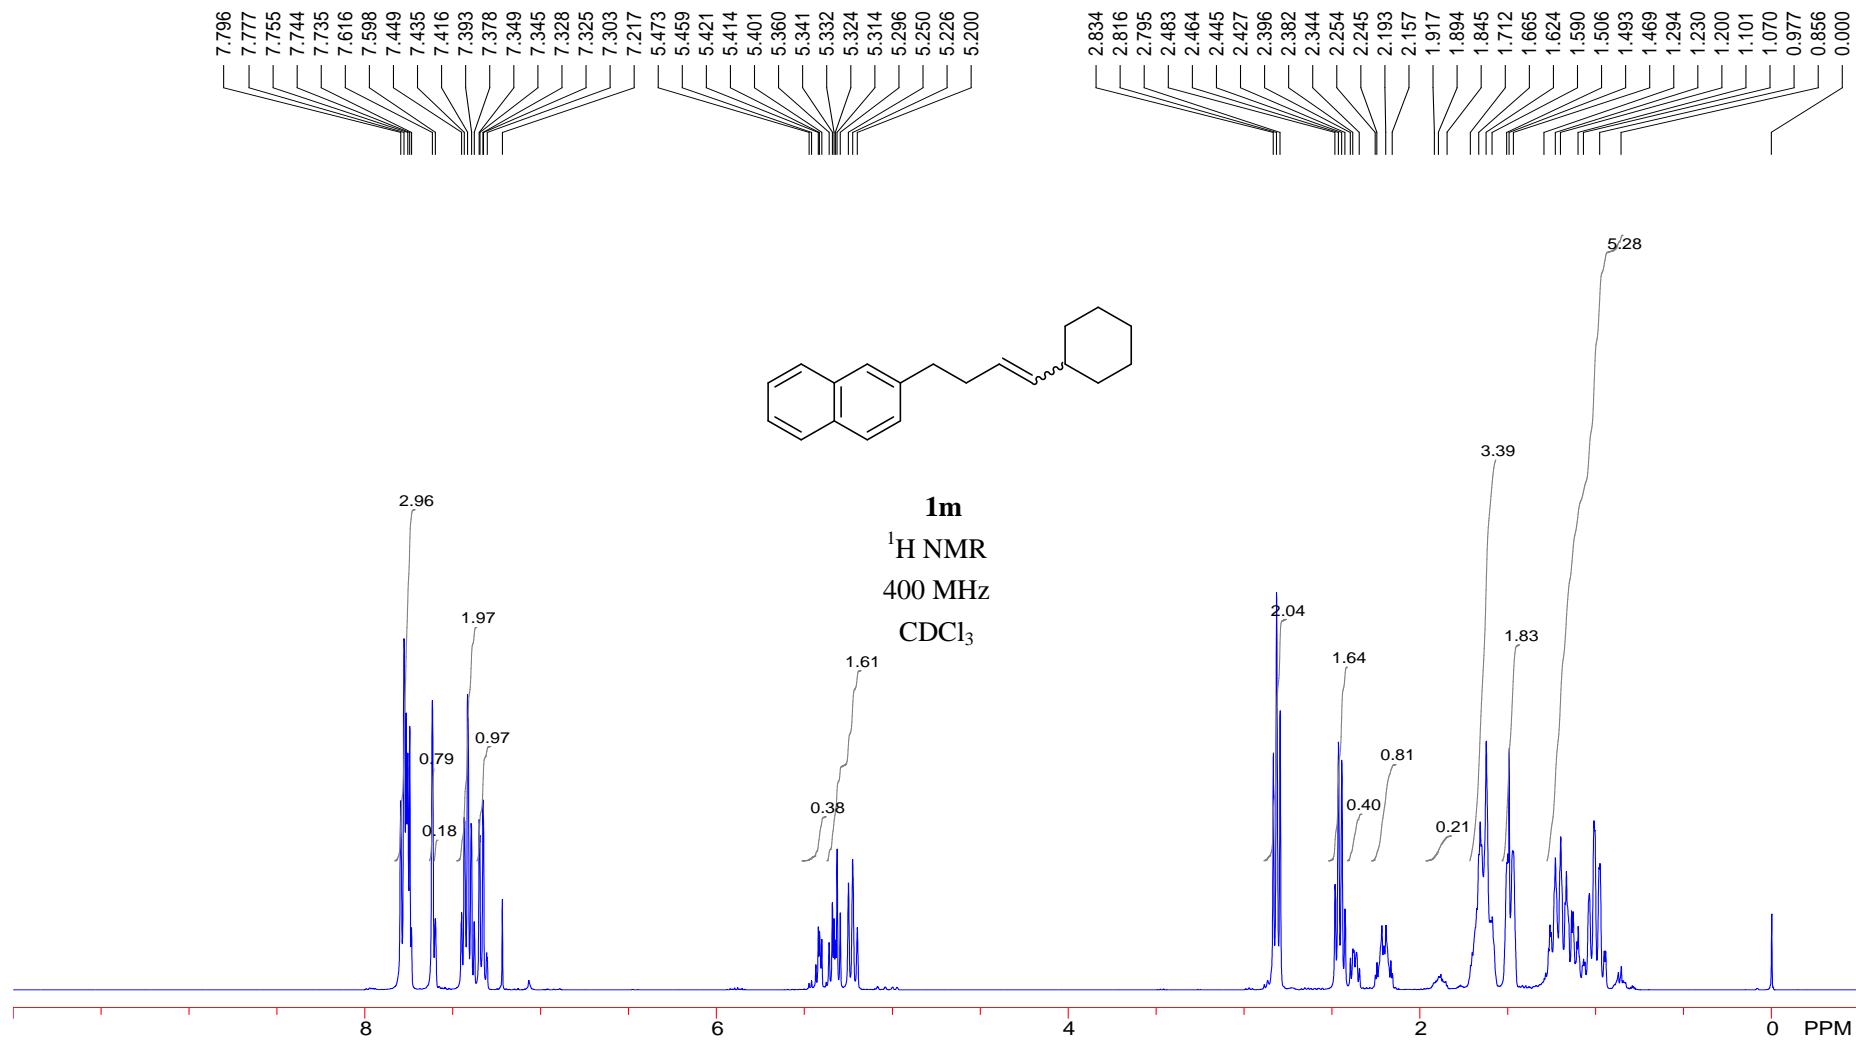

Supplementary Figure 76. <sup>1</sup>H NMR spectrum for **1m**

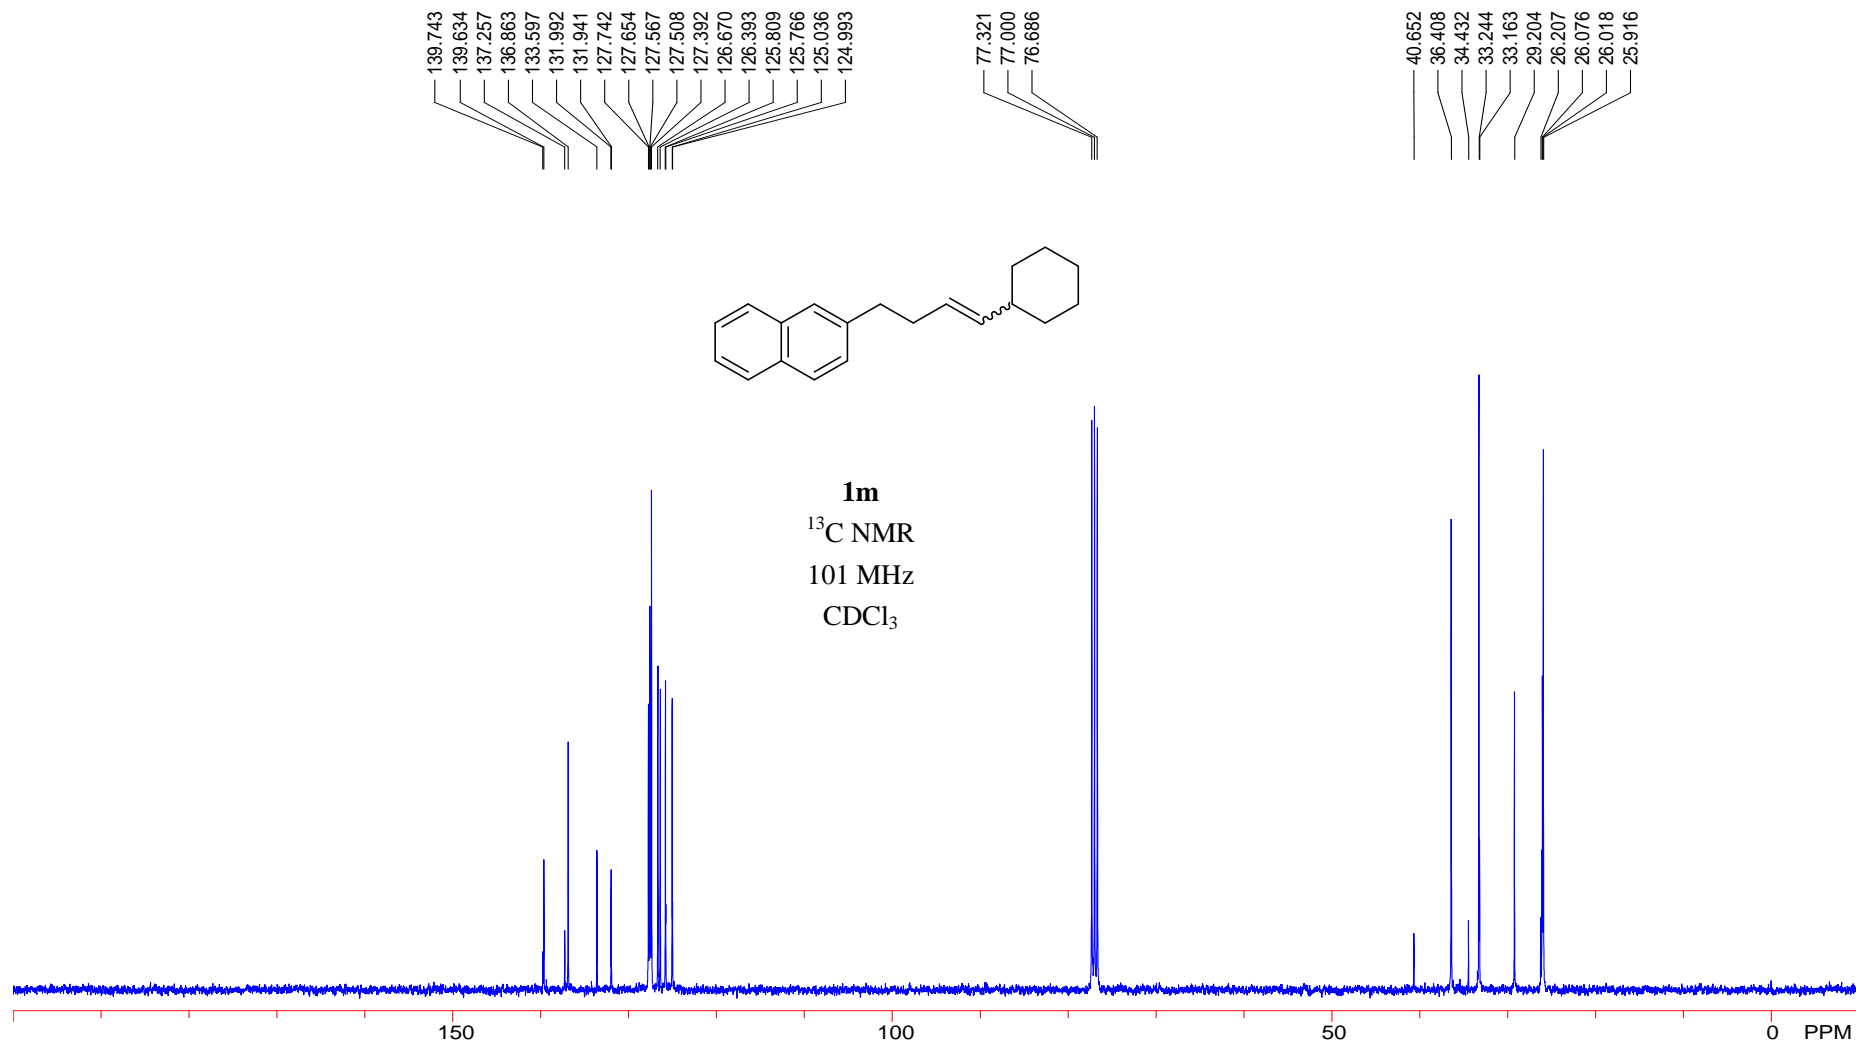

Supplementary Figure 77.  $^{13}\text{C}$  NMR spectrum for **1m**

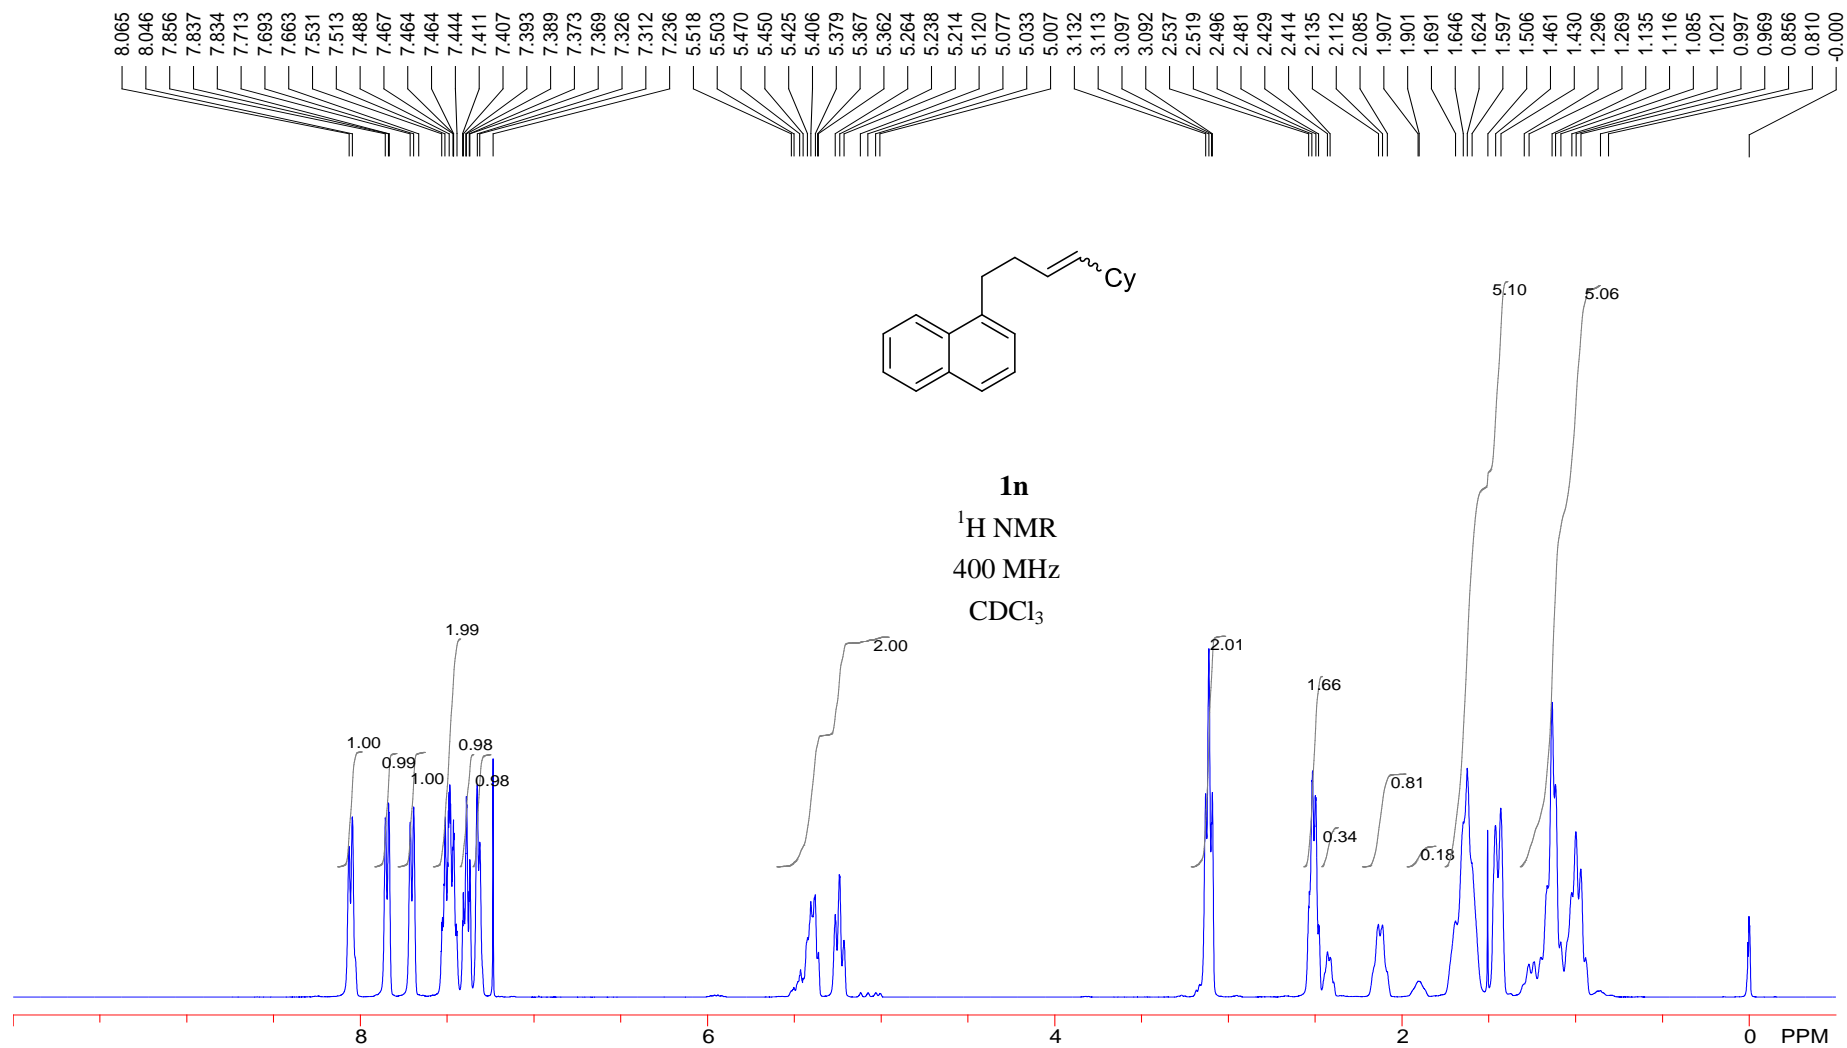

Supplementary Figure 78. <sup>1</sup>H NMR spectrum for **1n**

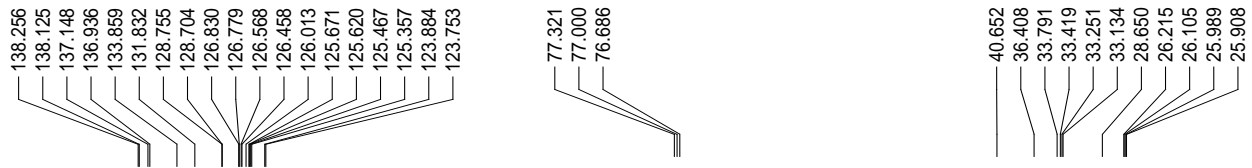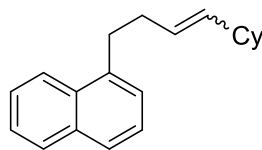

**1n**  
<sup>13</sup>C NMR  
101 MHz  
CDCl<sub>3</sub>

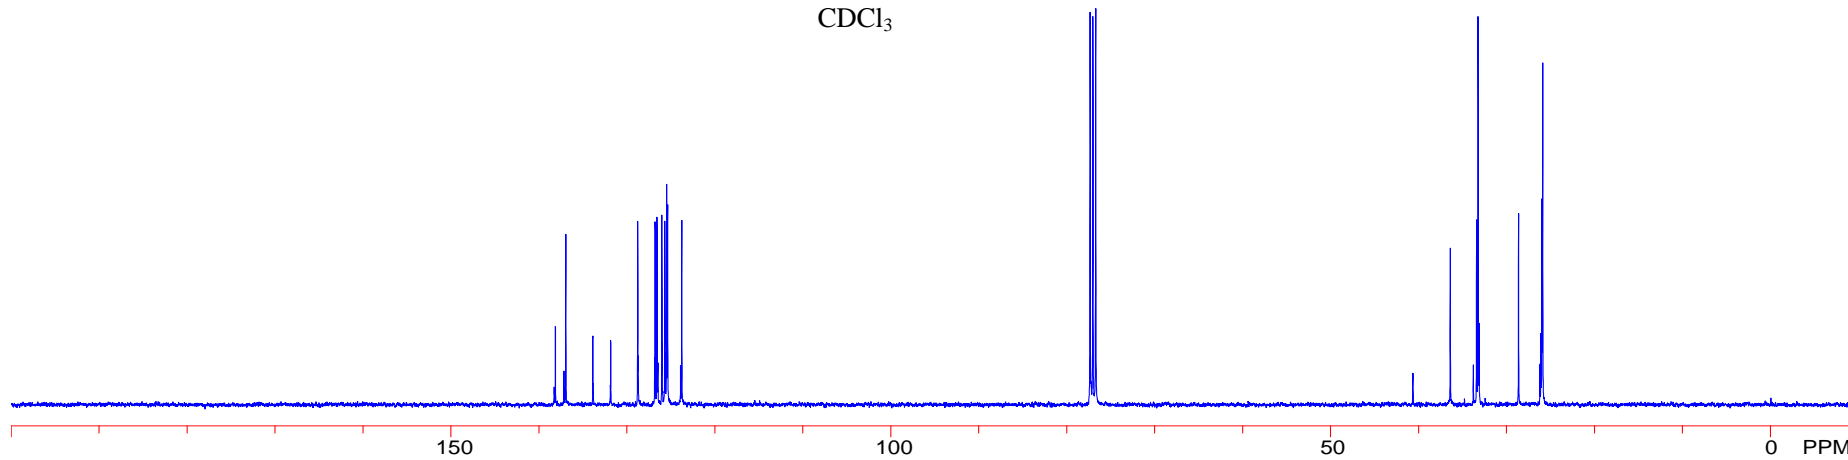

**Supplementary Figure 79.** <sup>13</sup>C NMR spectrum for **1n**



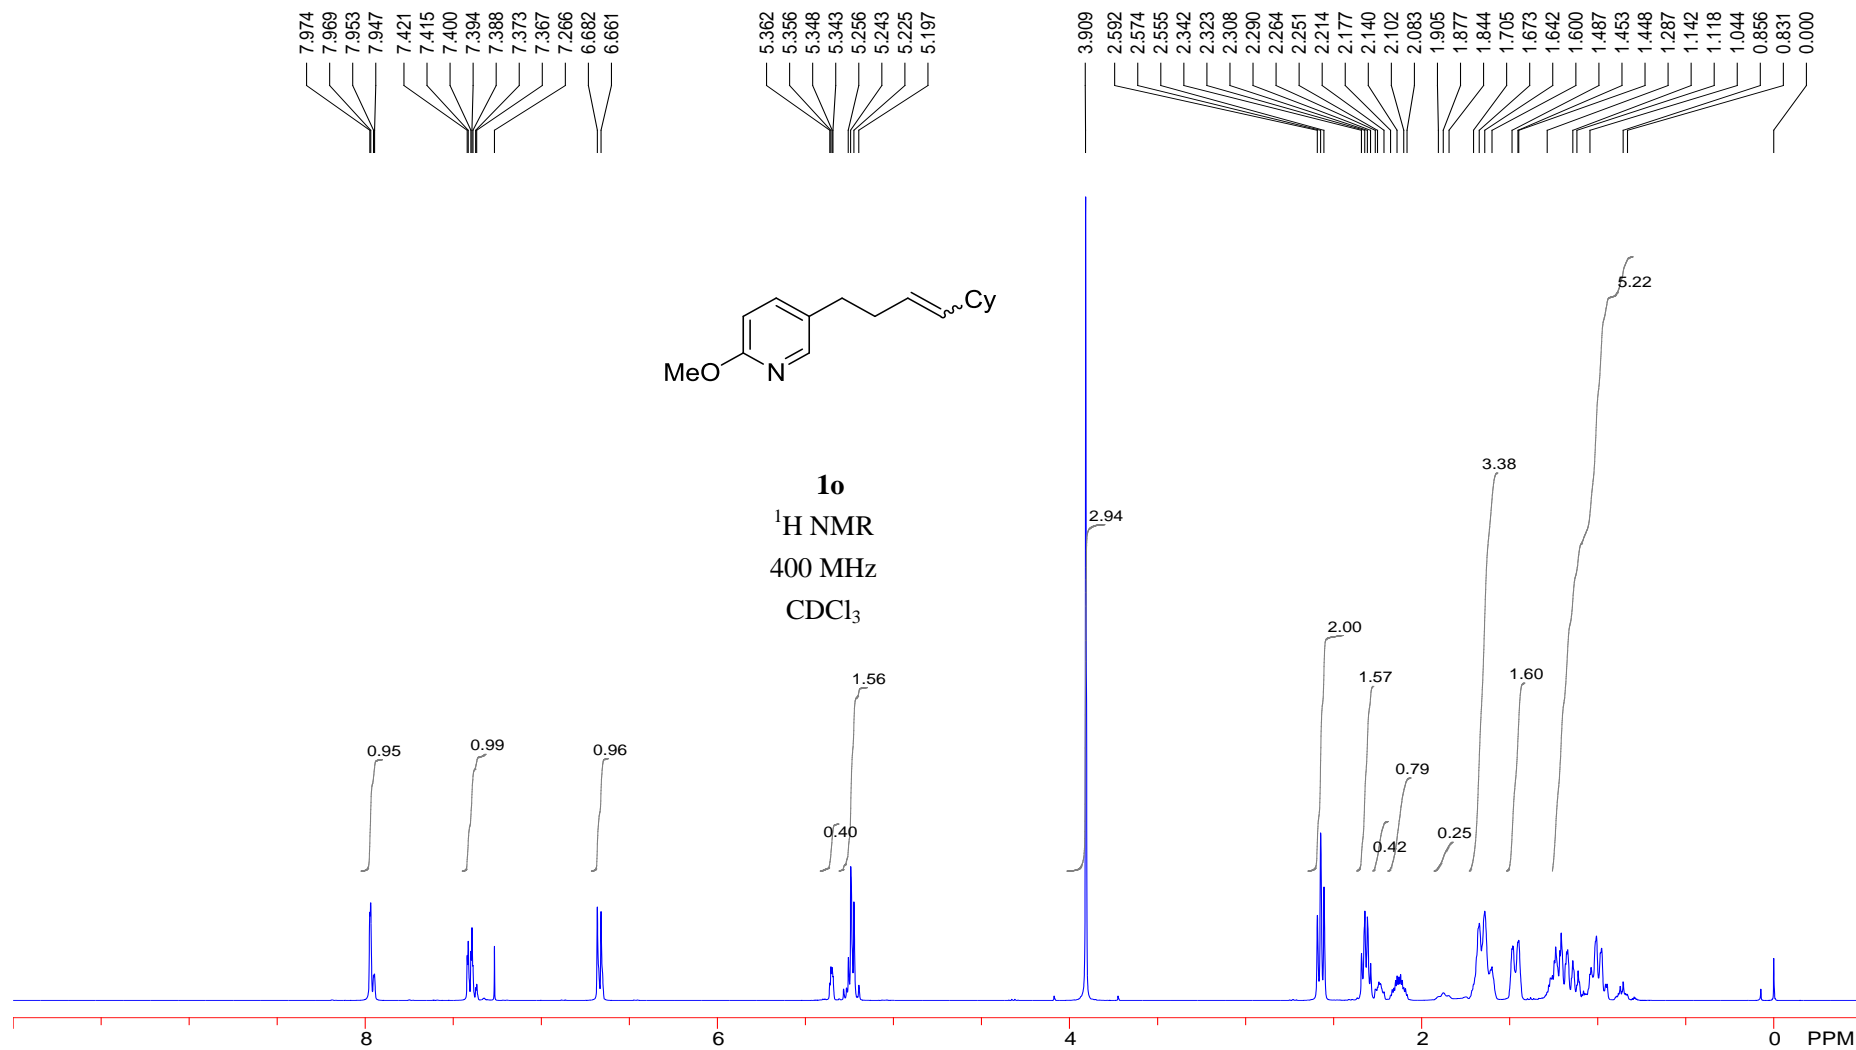

Supplementary Figure 80. <sup>1</sup>H NMR spectrum for **1o**

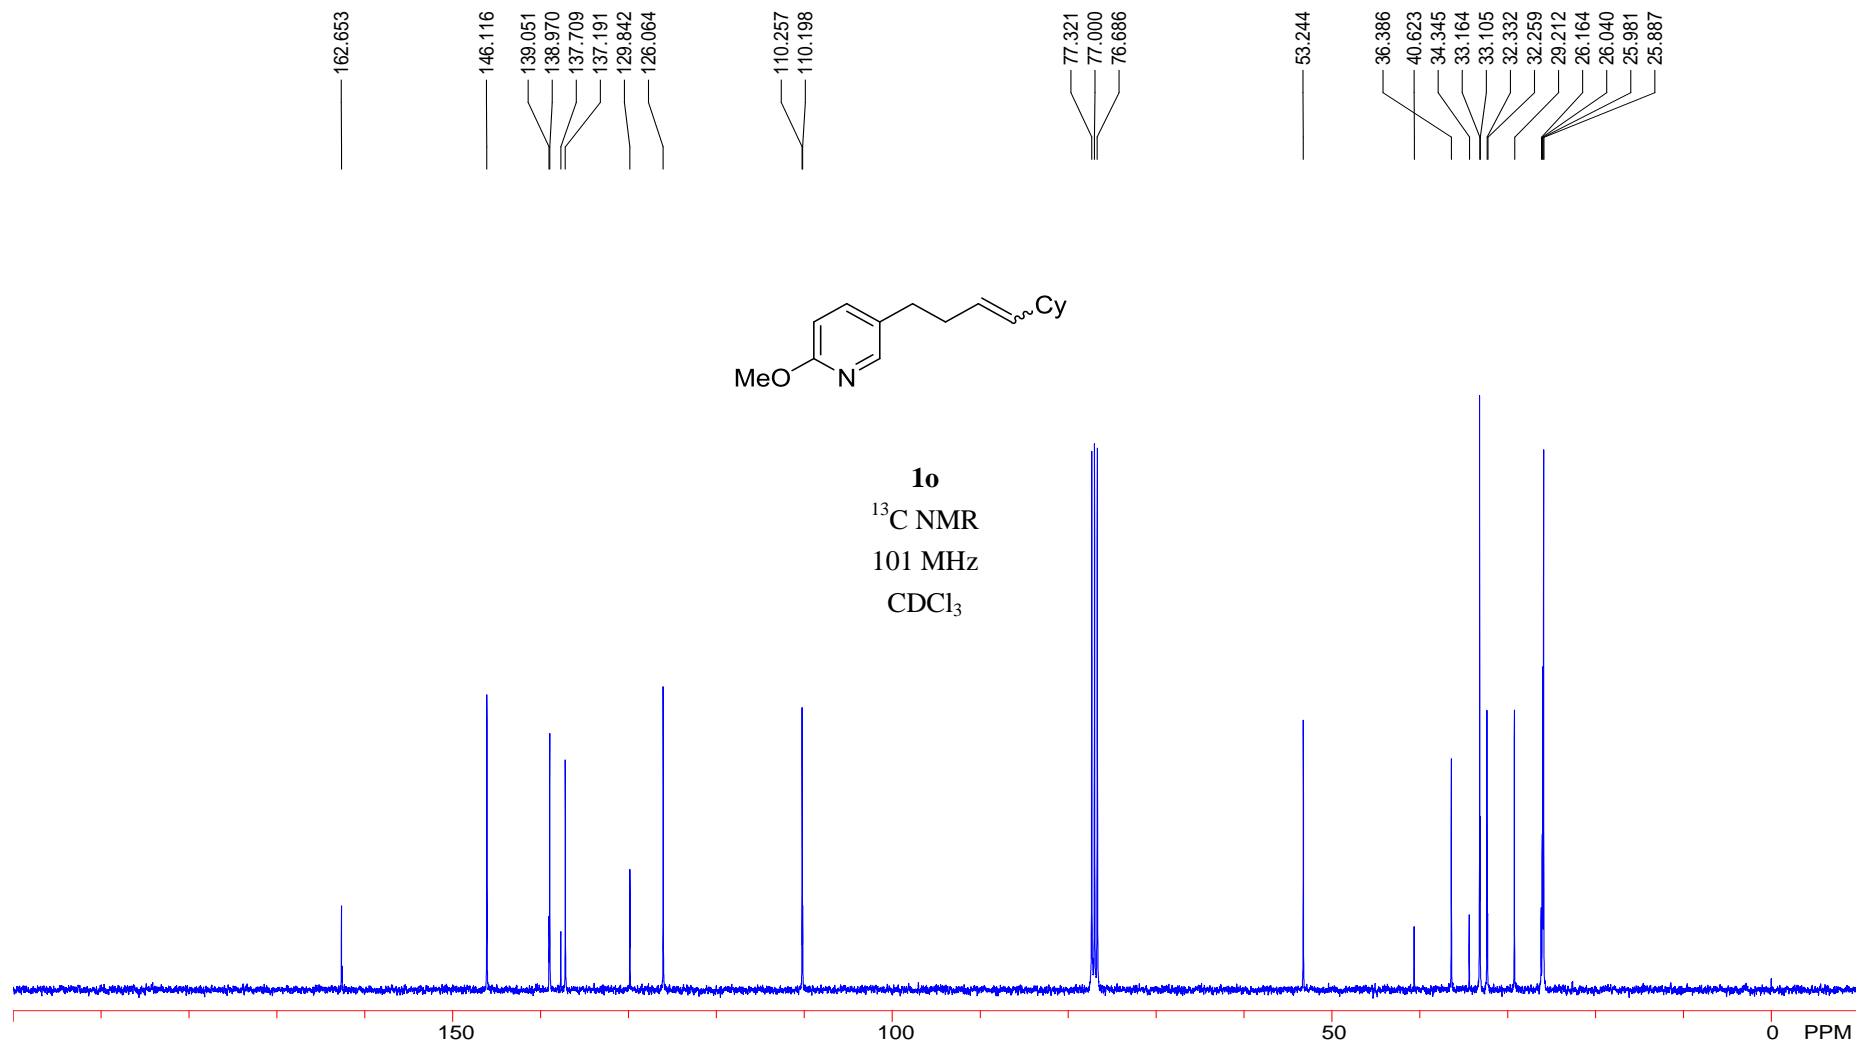

Supplementary Figure 81. <sup>13</sup>C NMR spectrum for **1o**

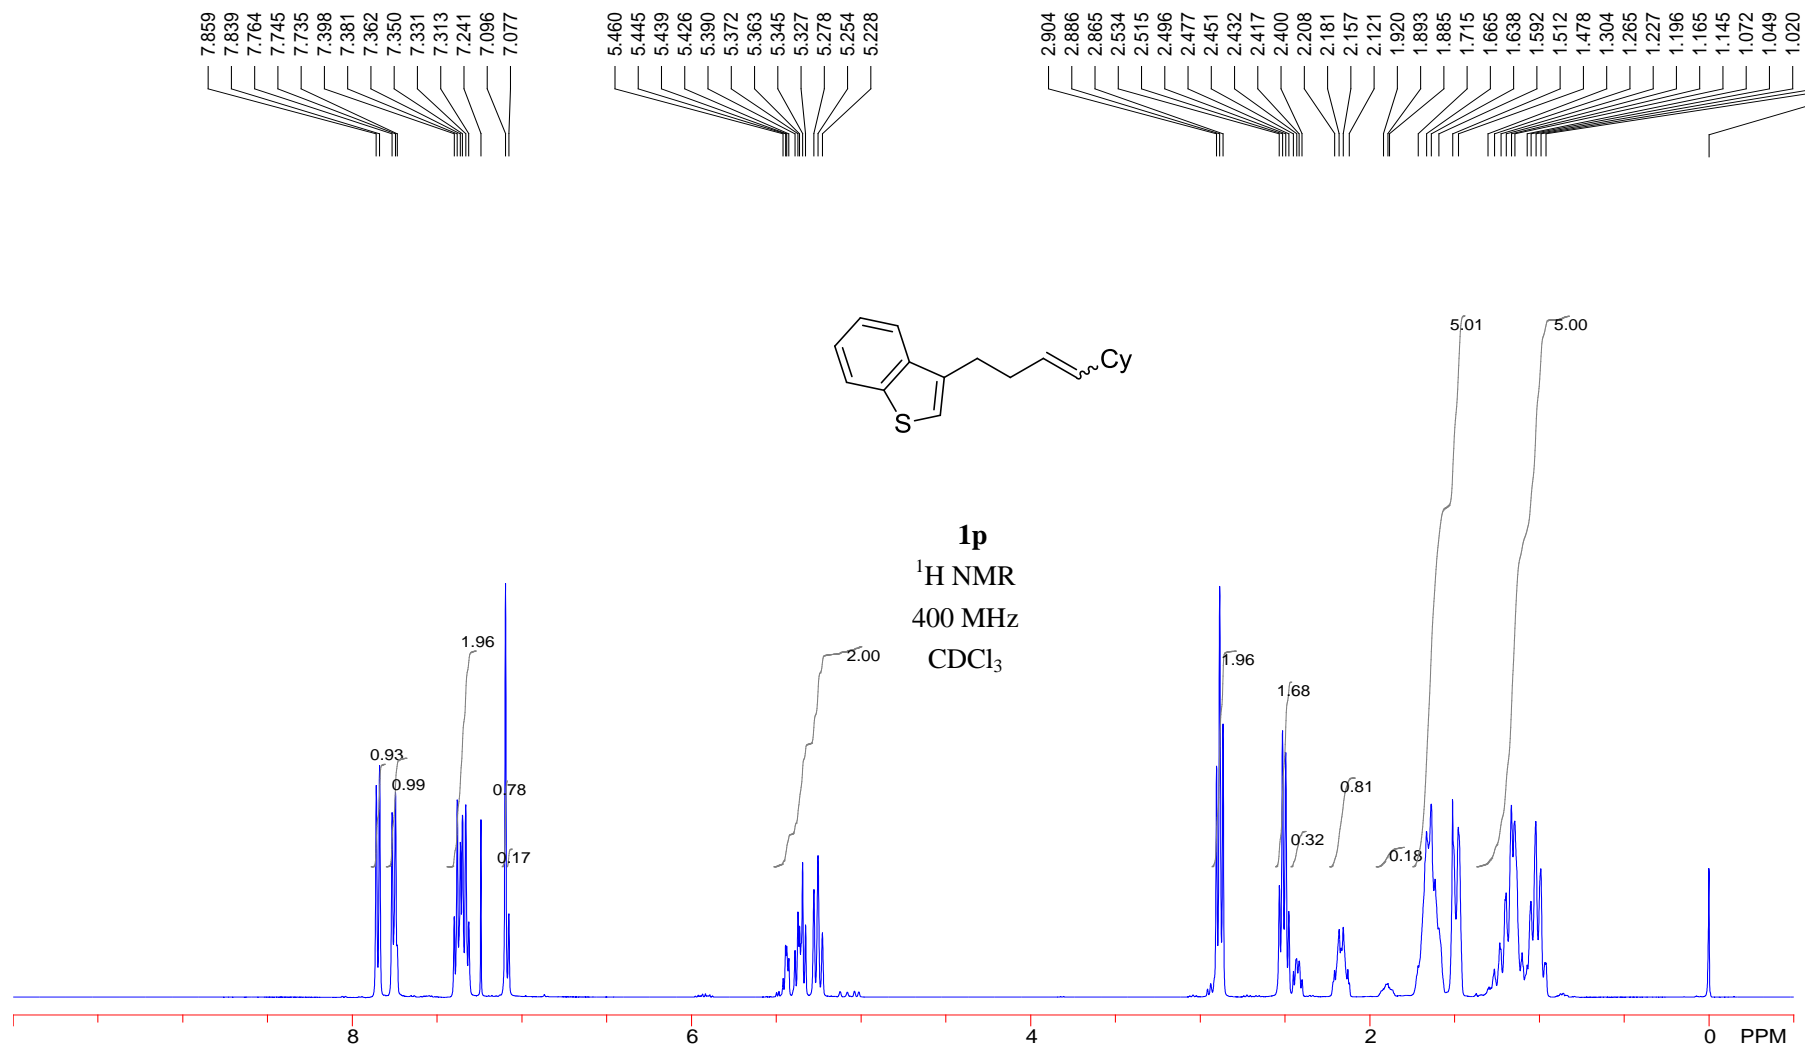

Supplementary Figure 82. <sup>1</sup>H NMR spectrum for **1p**

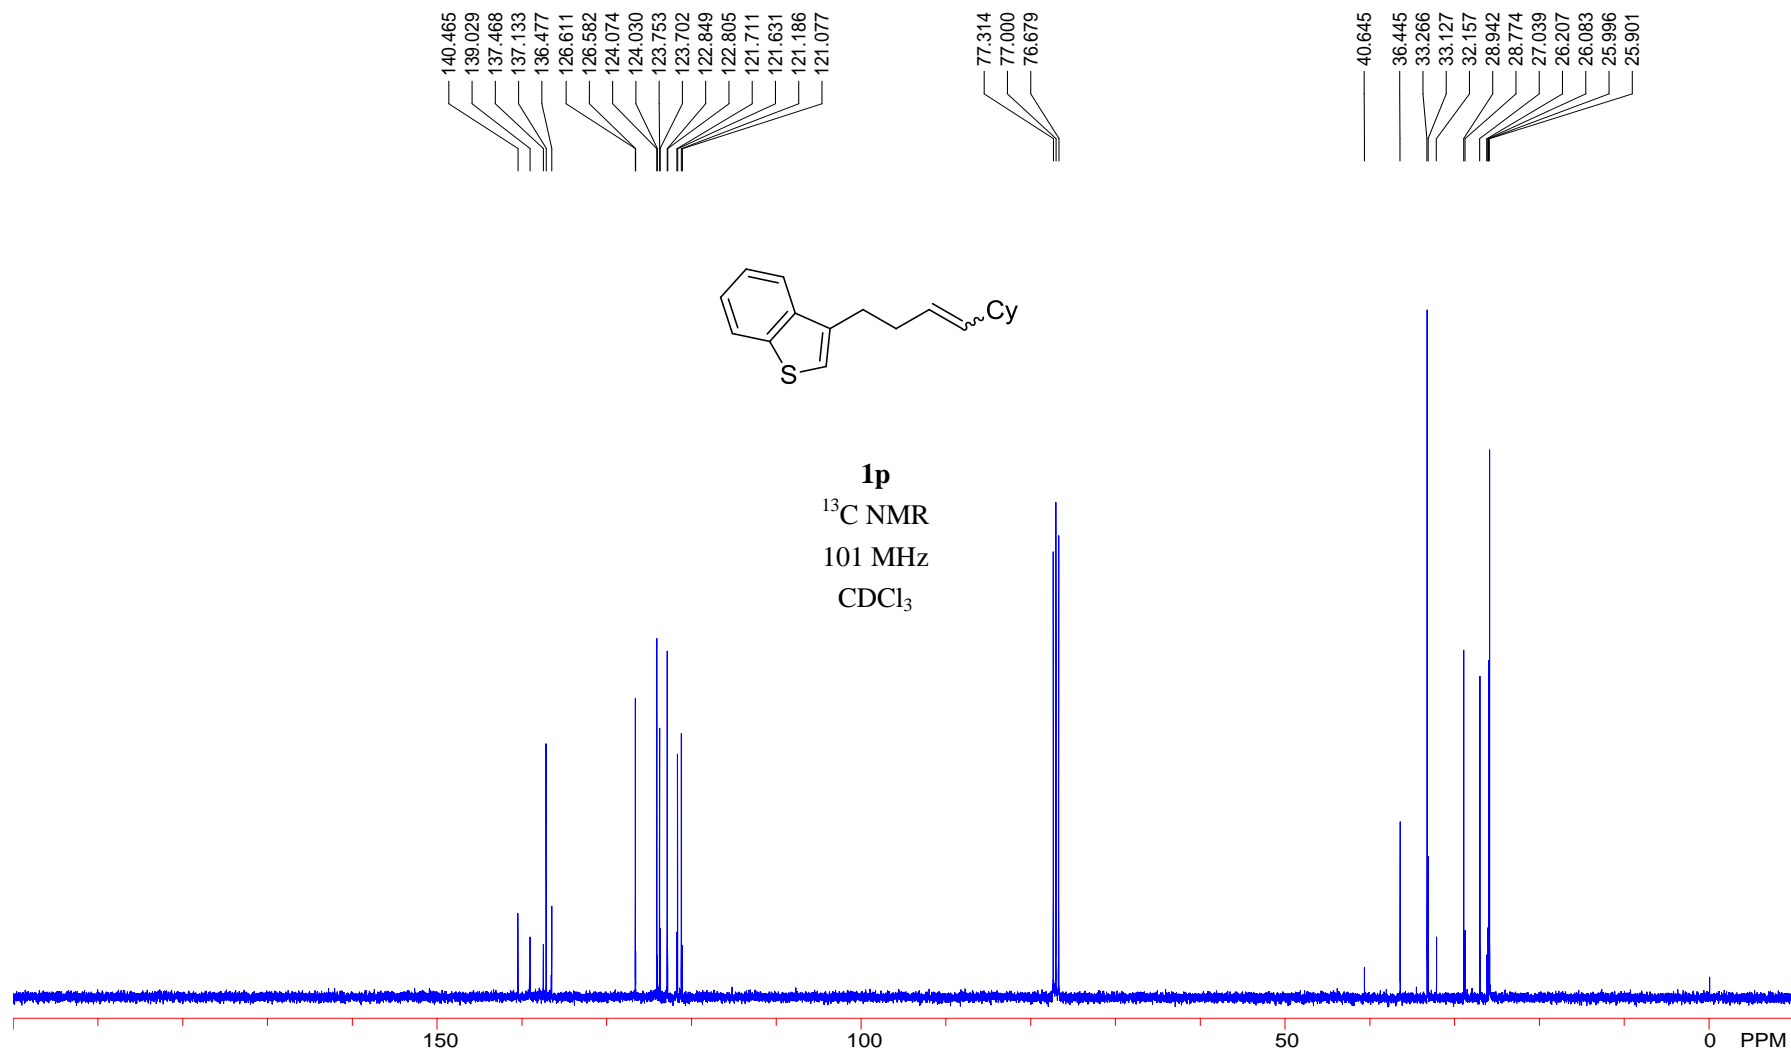

Supplementary Figure 83. <sup>13</sup>C NMR spectrum for **1p**

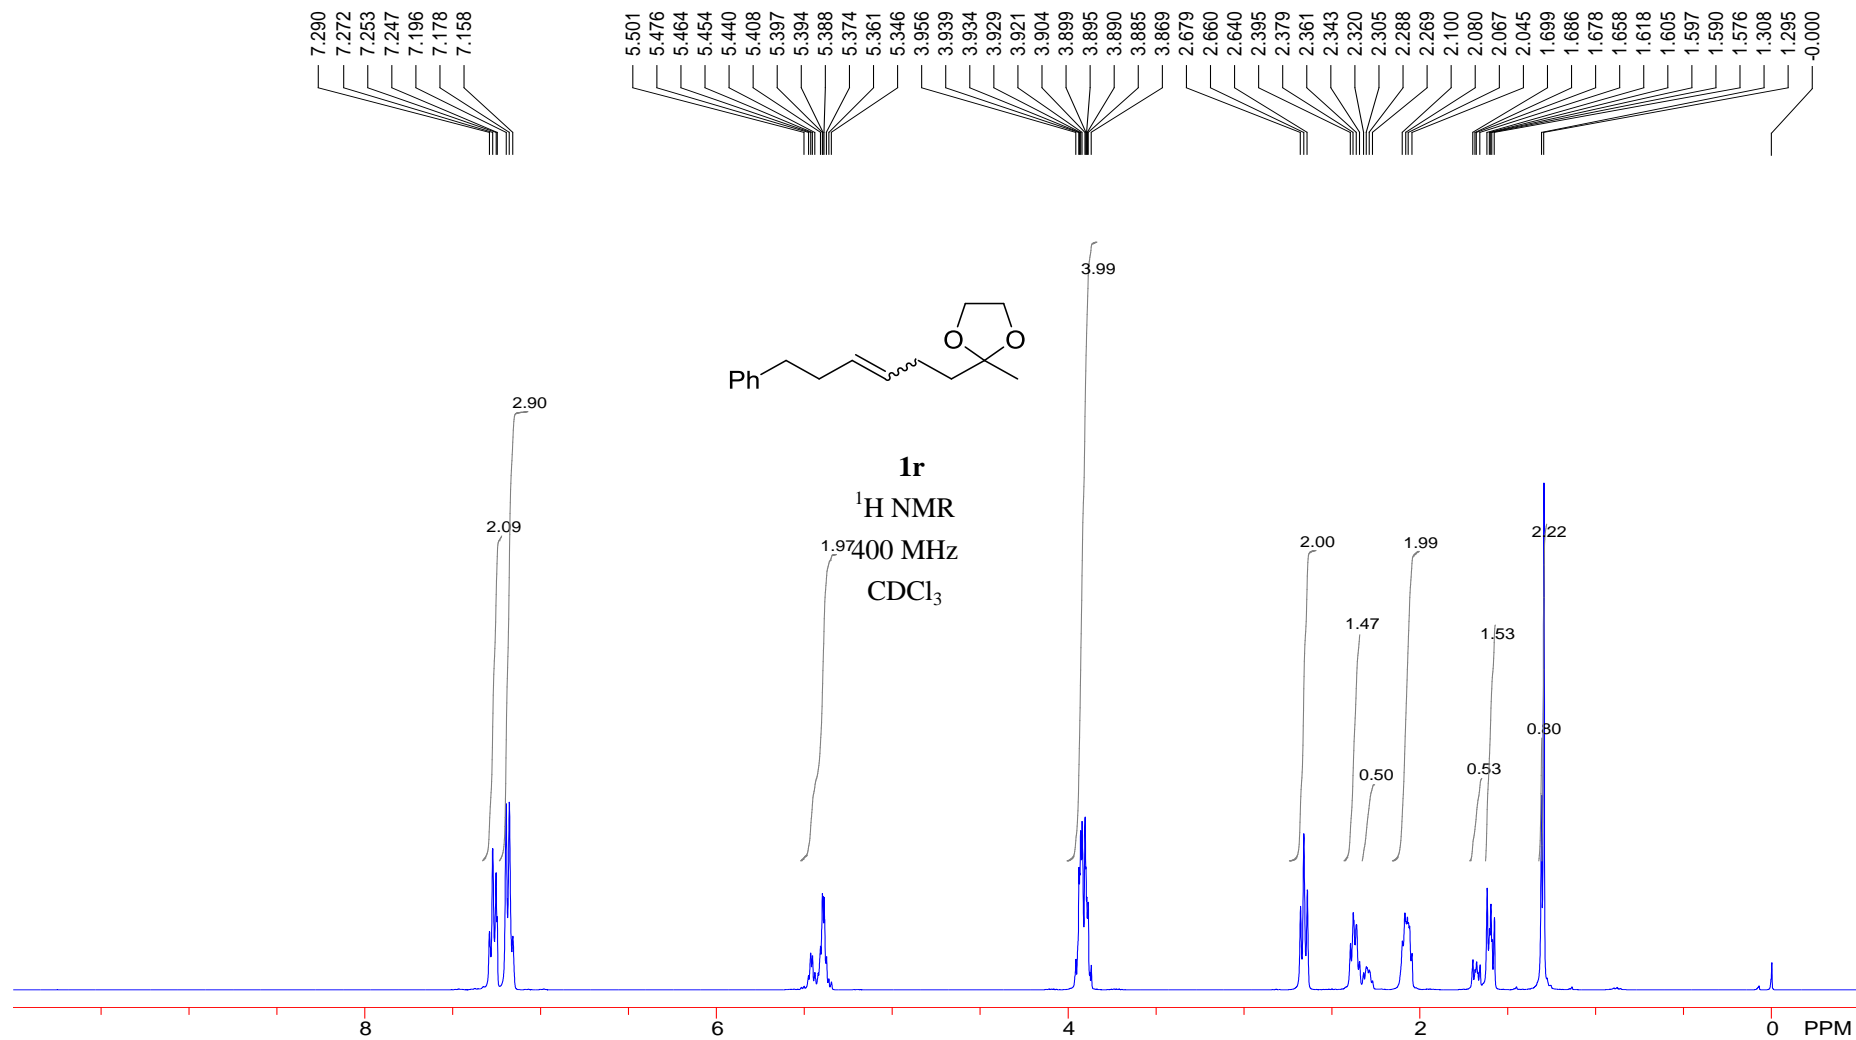

Supplementary Figure 84.  $^1\text{H}$  NMR spectrum for **1r**

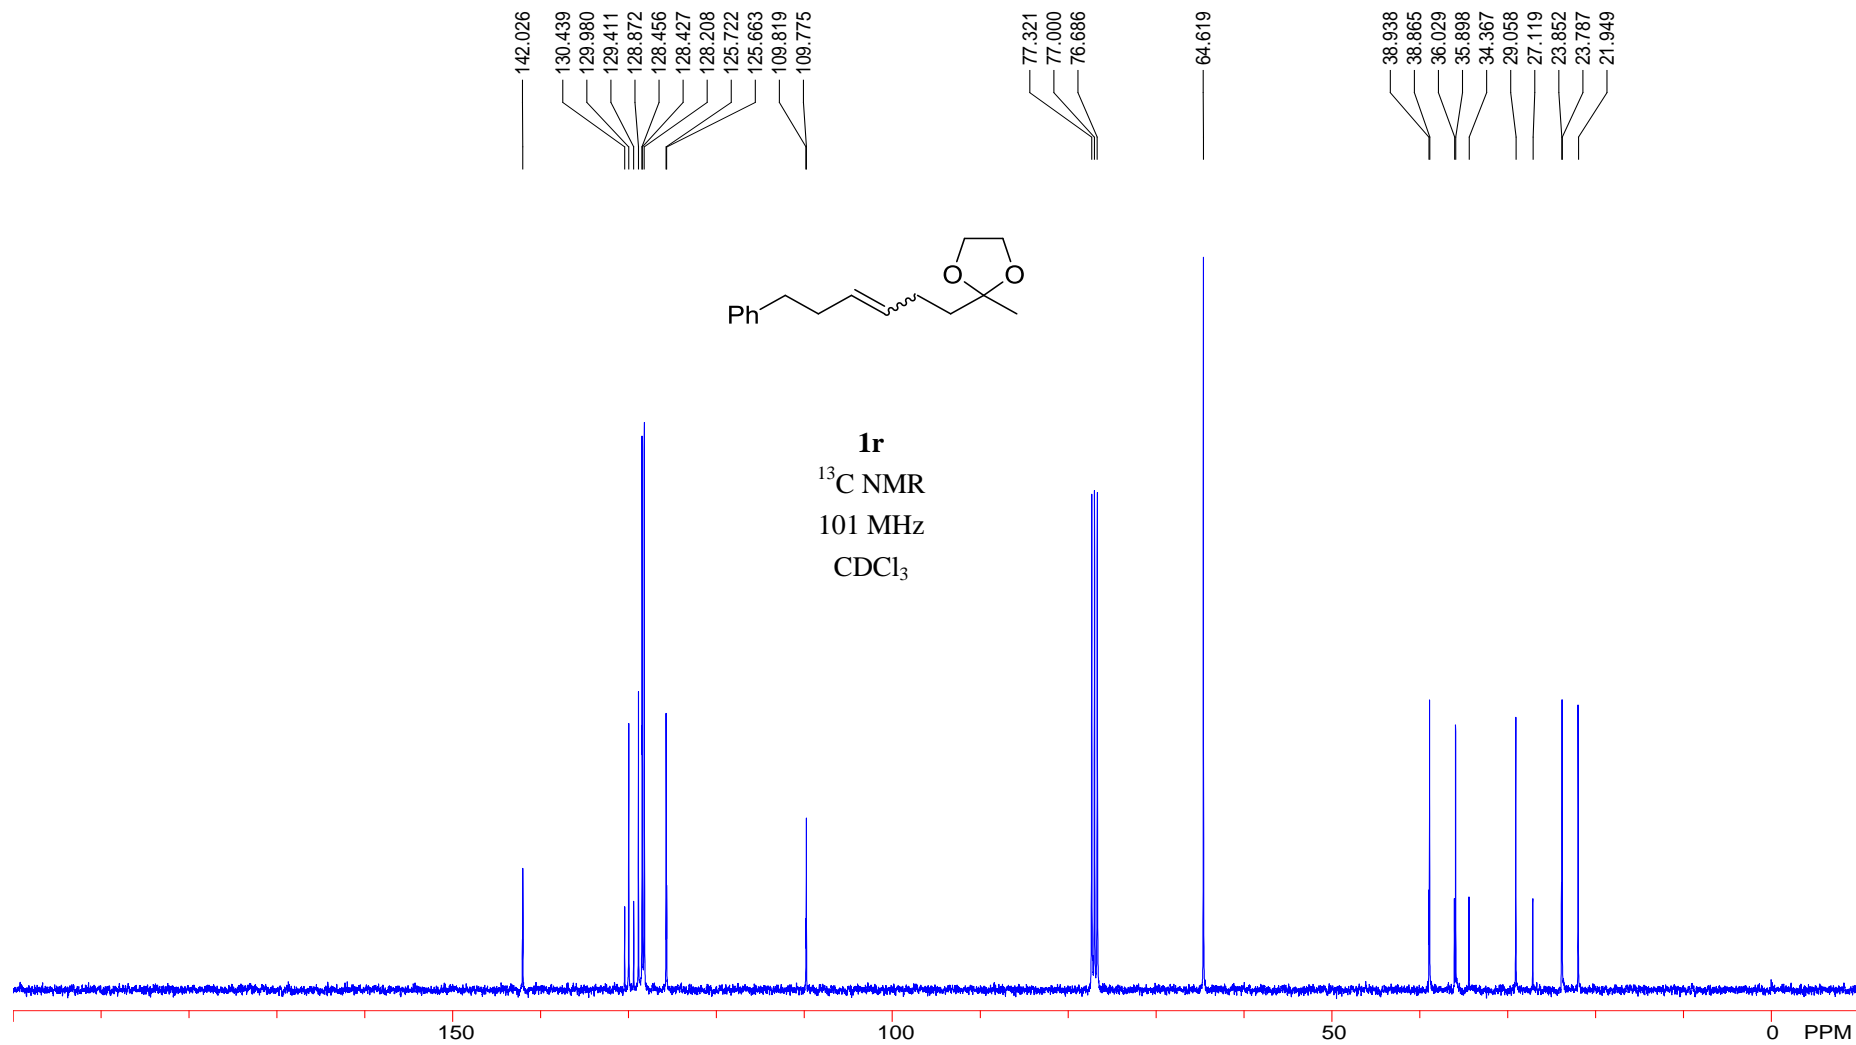

Supplementary Figure 85. <sup>13</sup>C NMR spectrum for **1r**

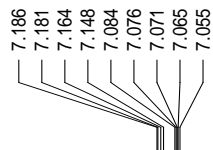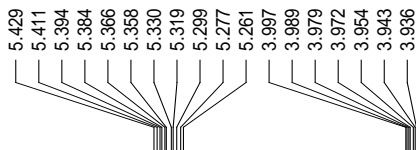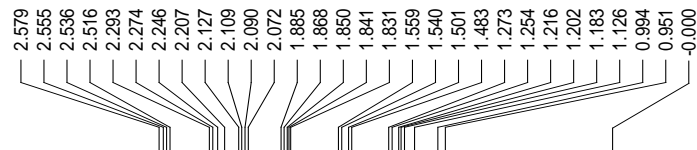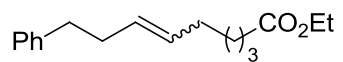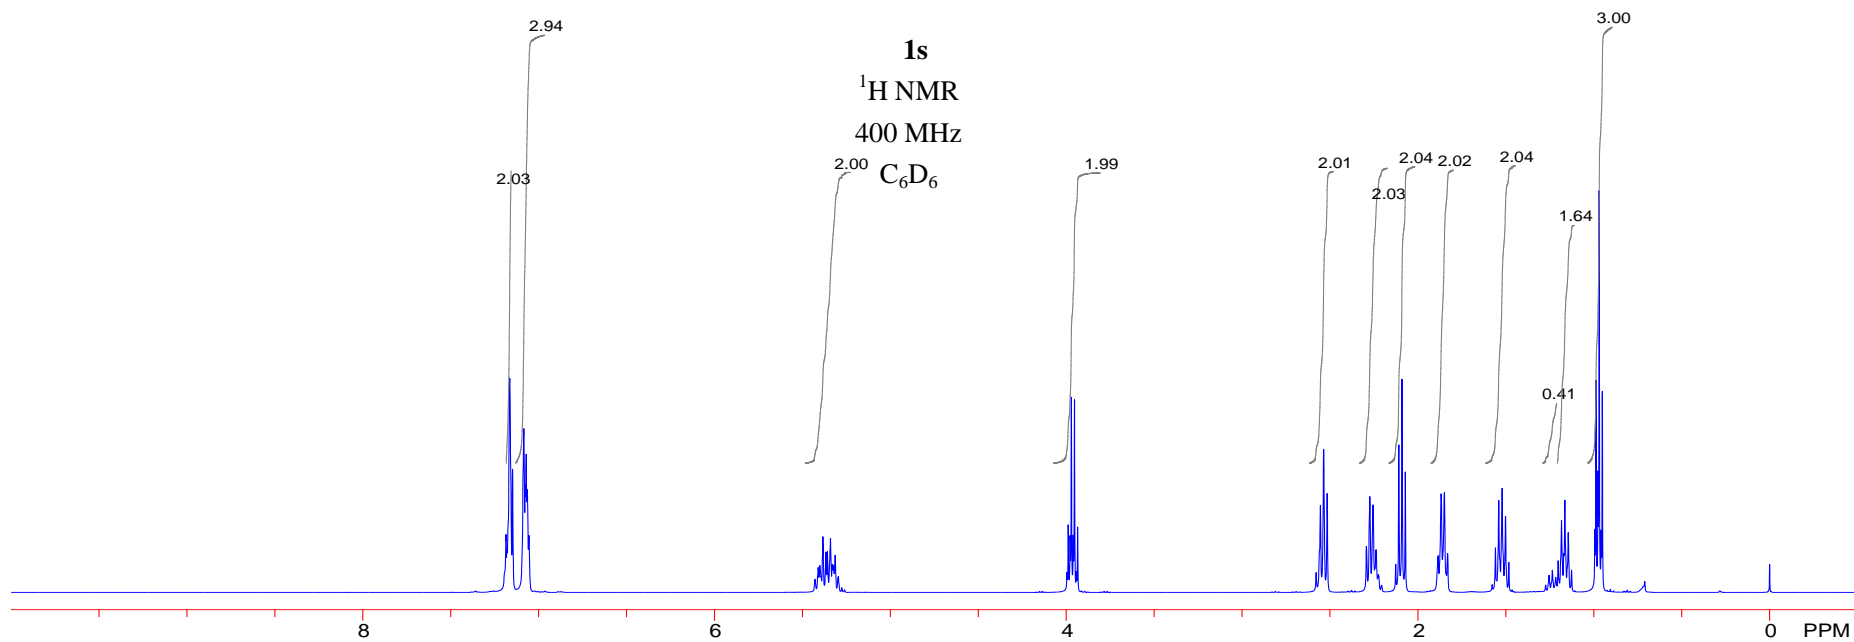

Supplementary Figure 86. <sup>1</sup>H NMR spectrum for **1s**

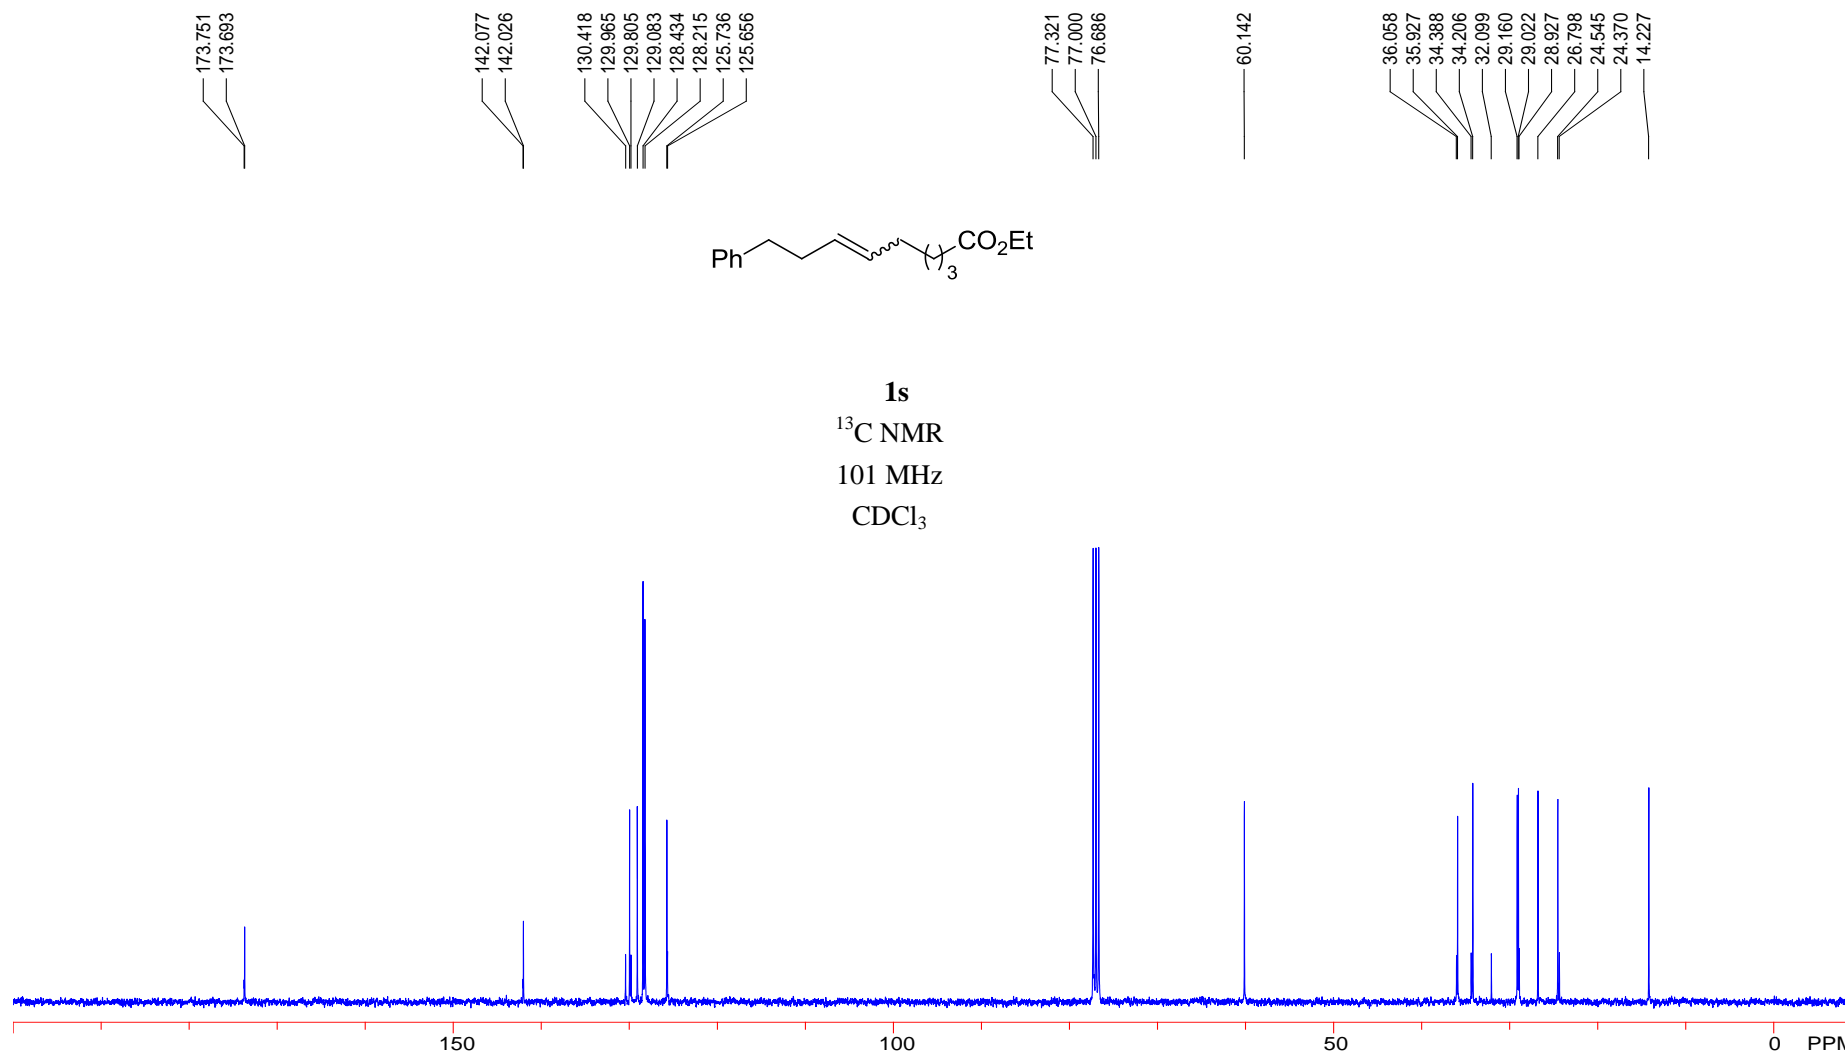

Supplementary Figure 87. <sup>13</sup>C NMR spectrum for **1s**



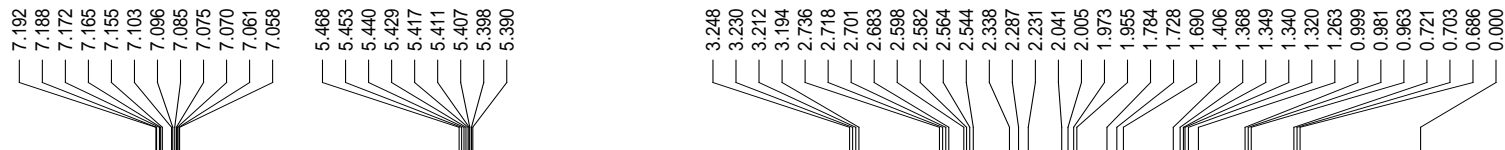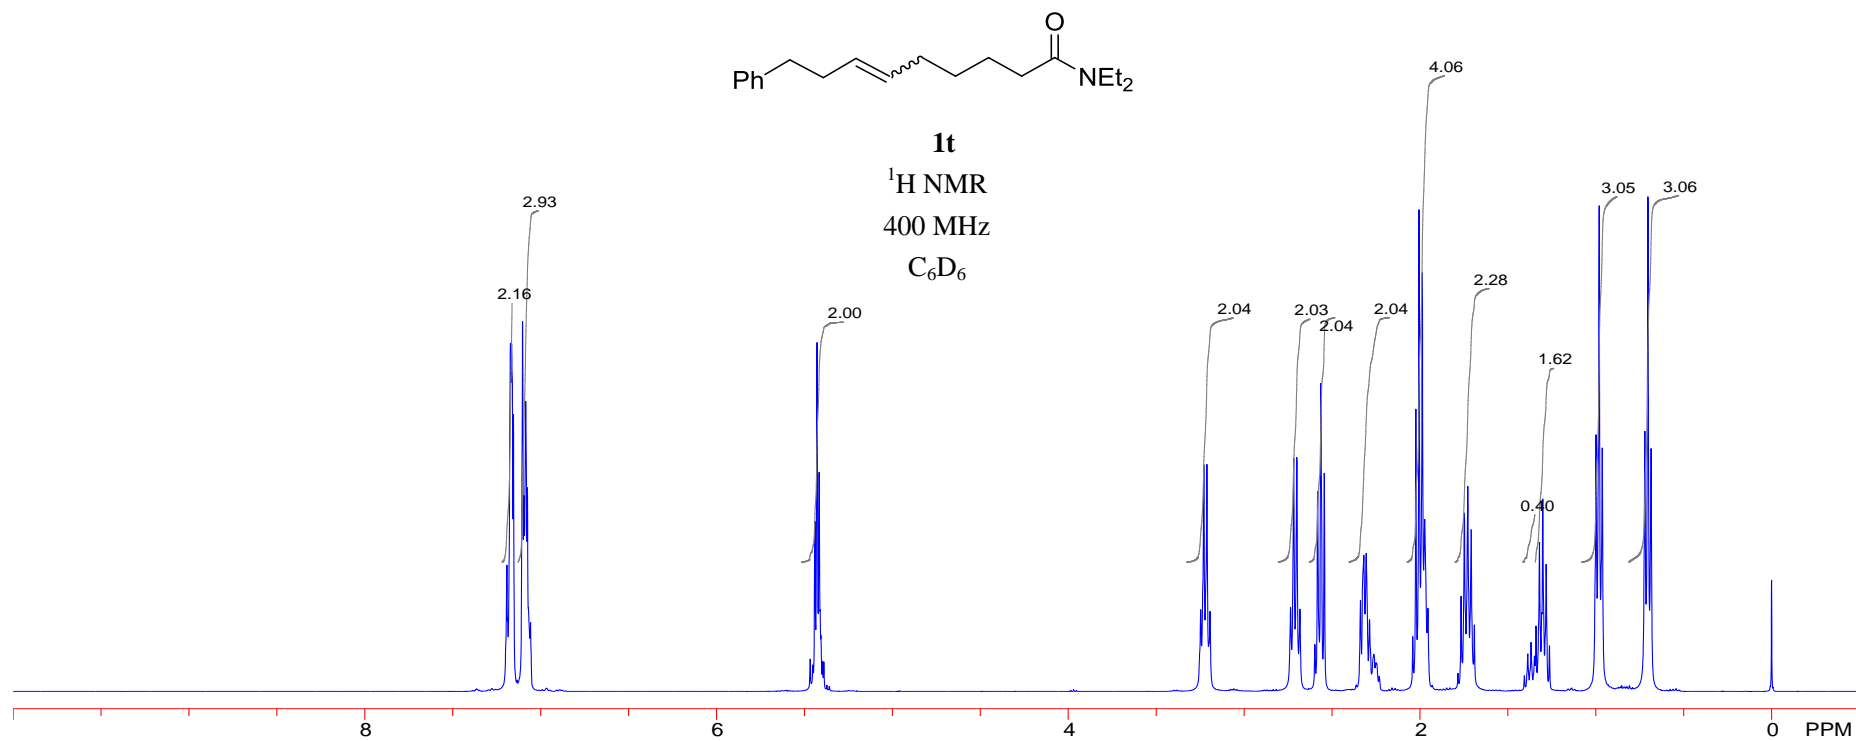

Supplementary Figure 88. <sup>1</sup>H NMR spectrum for **1t**

172.037

142.026

130.571

130.170

129.601

128.850

128.405

128.164

125.656

125.598

77.321

77.000

76.686

41.870

39.945

36.029

35.898

34.388

32.945

32.318

29.408

29.299

29.131

27.009

25.070

24.895

14.344

13.061

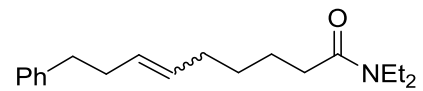

**1t**

$^{13}\text{C}$  NMR

101 MHz

$\text{CDCl}_3$

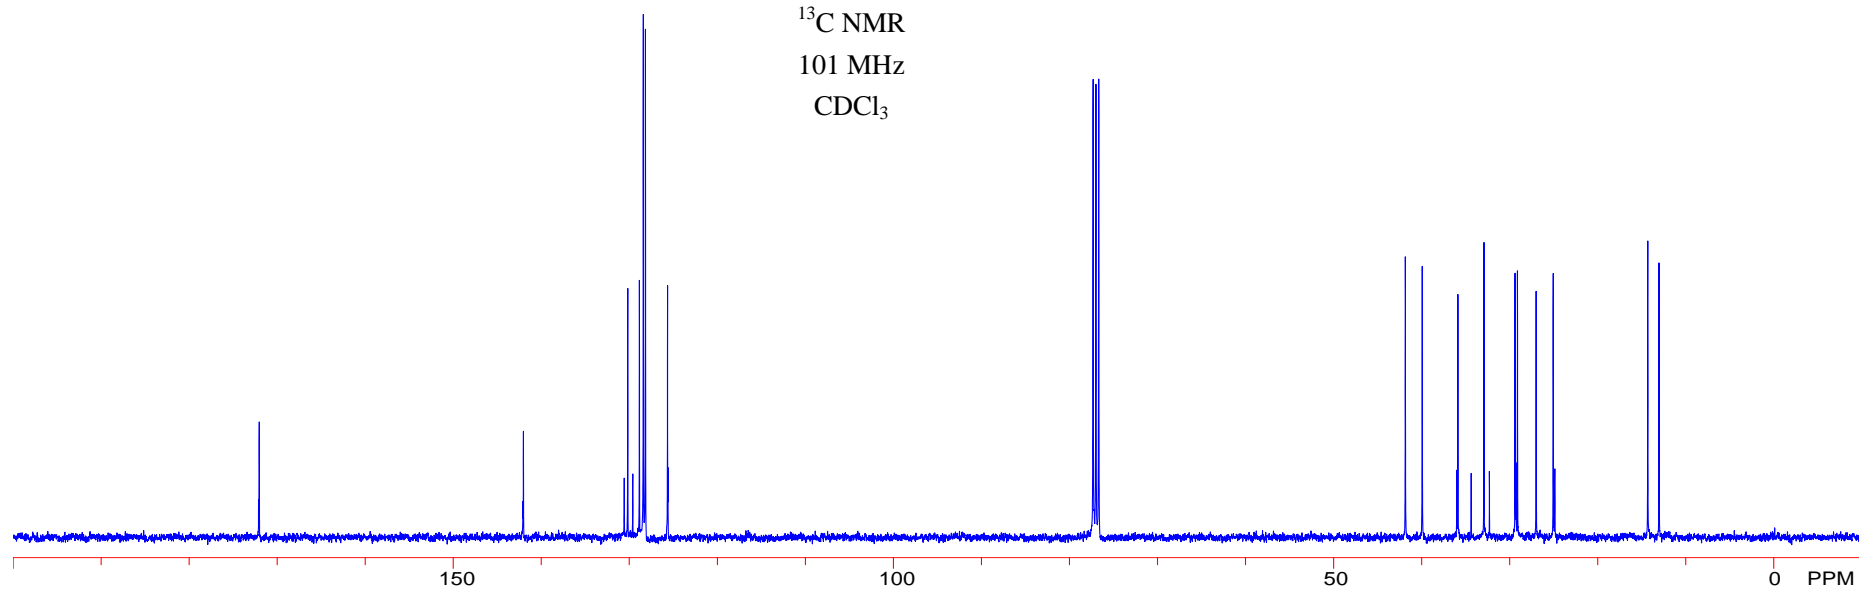

**Supplementary Figure 89.**  $^{13}\text{C}$  NMR spectrum for **1t**

7.283  
7.264  
7.245  
7.220  
7.203  
7.177  
7.159  
7.141

5.453  
5.447  
5.422  
5.411  
5.395  
5.382  
5.367  
5.355  
5.339

3.545  
3.531  
3.516  
3.500  
3.478  
3.452  
3.426  
2.924  
2.670  
2.651  
2.632  
2.384  
2.365  
2.348  
2.331  
2.316  
2.296  
2.284  
2.280  
2.266  
2.060  
2.055  
2.050  
2.044  
2.039  
2.024  
2.008  
1.991  
1.975  
1.526  
1.475  
1.458  
1.370  
1.349  
1.313  
1.251

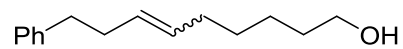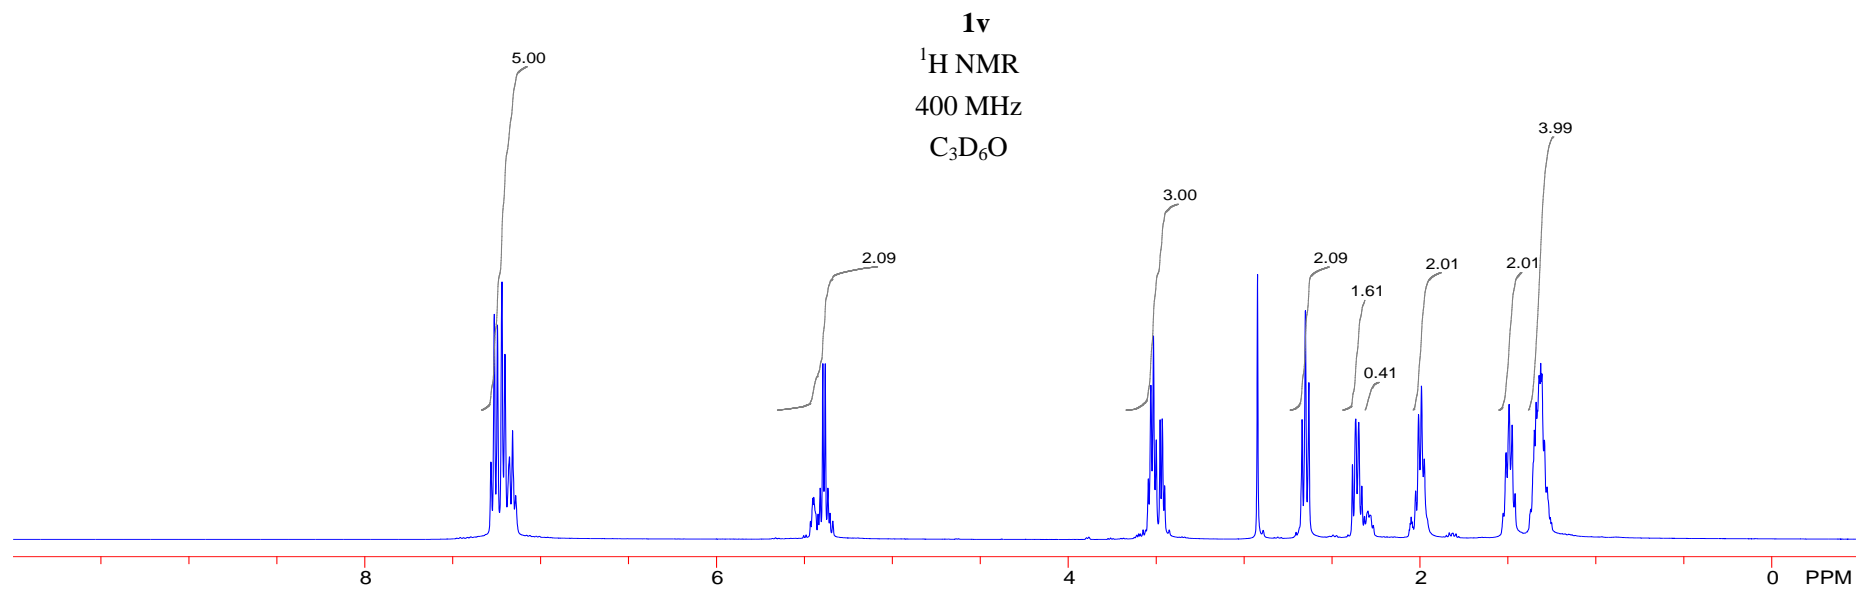

Supplementary Figure 90. <sup>1</sup>H NMR spectrum for **1v**

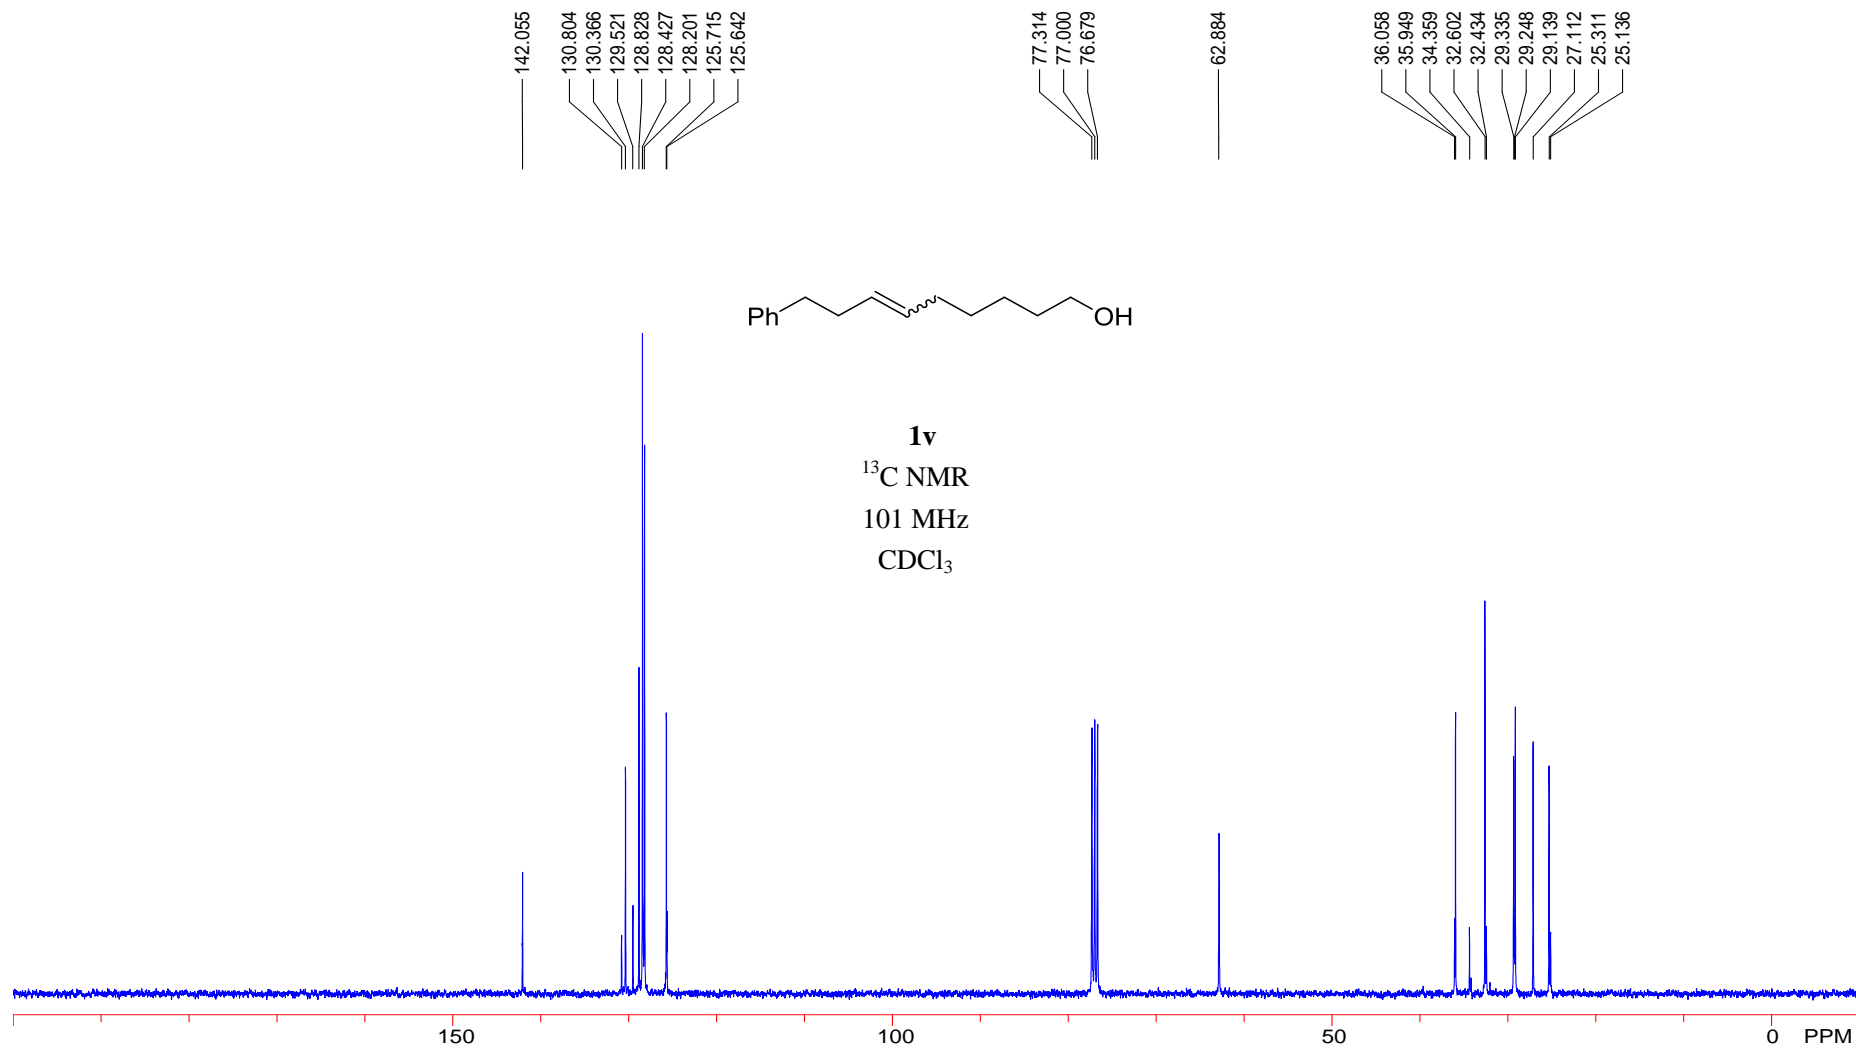

Supplementary Figure 91.  $^{13}\text{C}$  NMR spectrum for **1v**

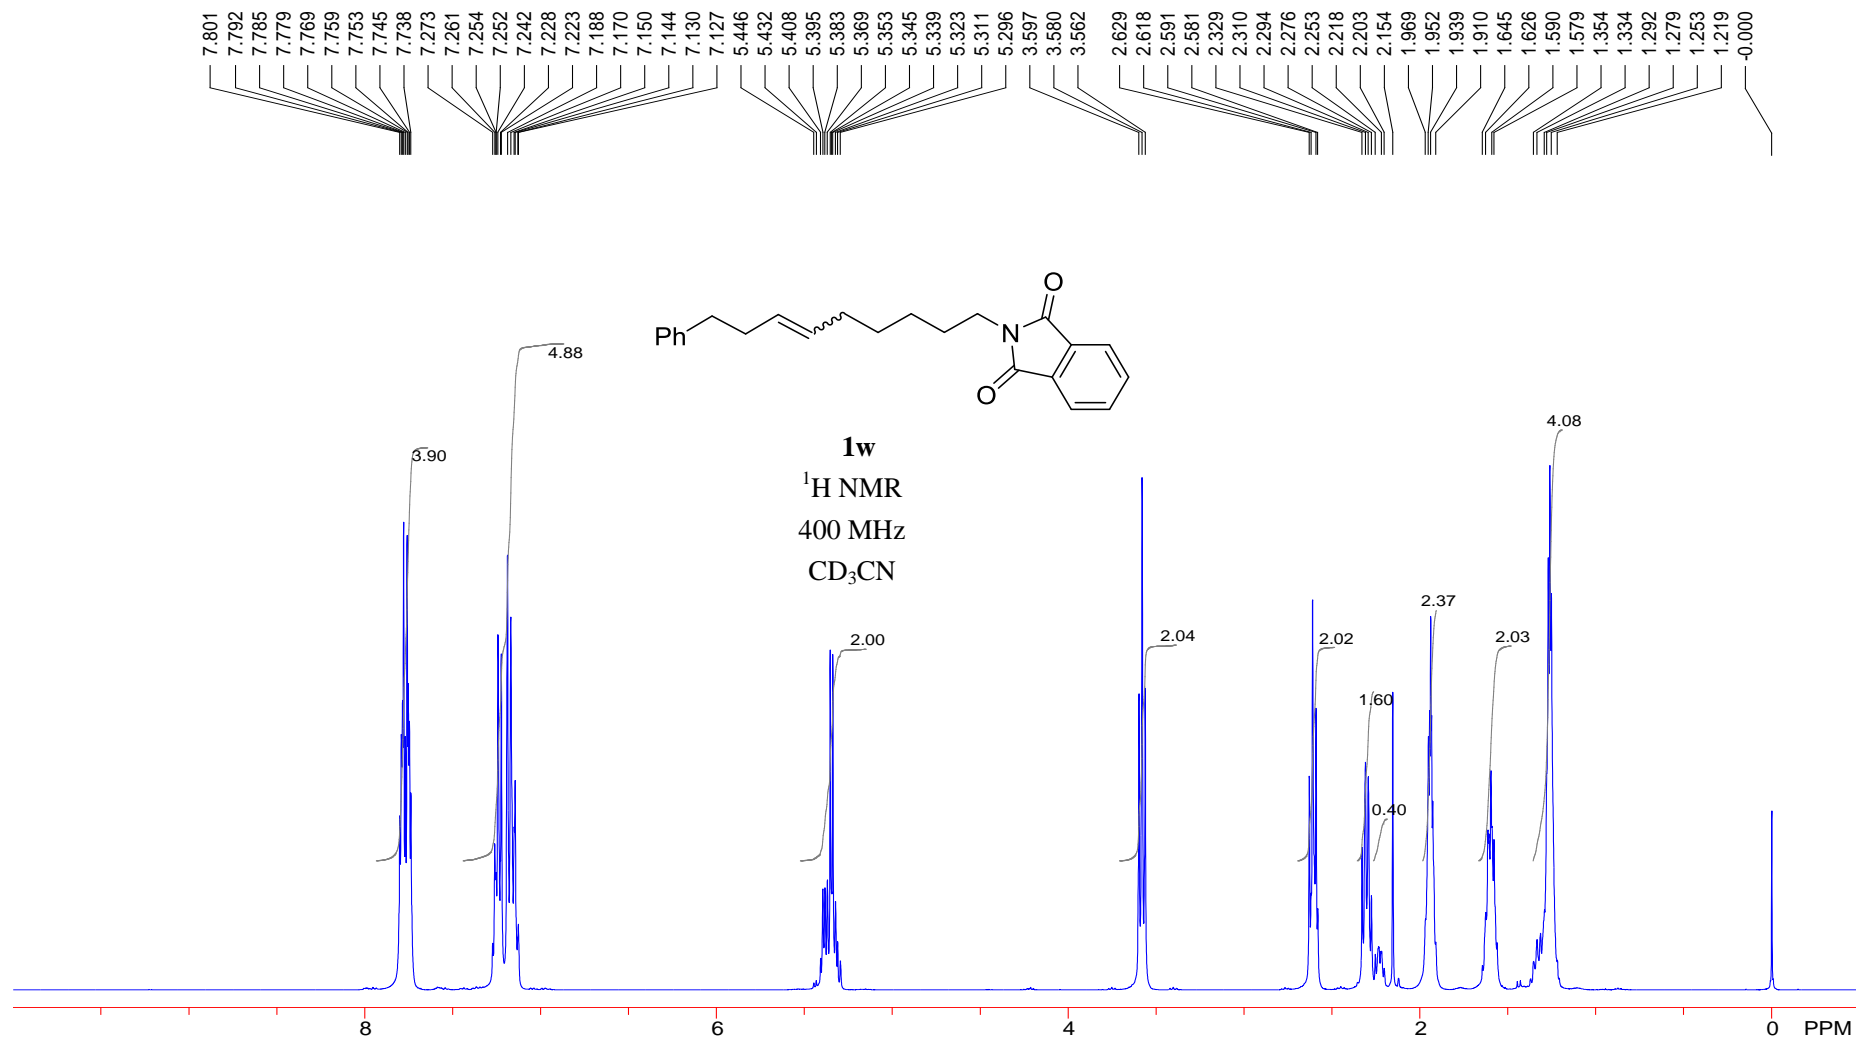

Supplementary Figure 92. <sup>1</sup>H NMR spectrum for **1w**

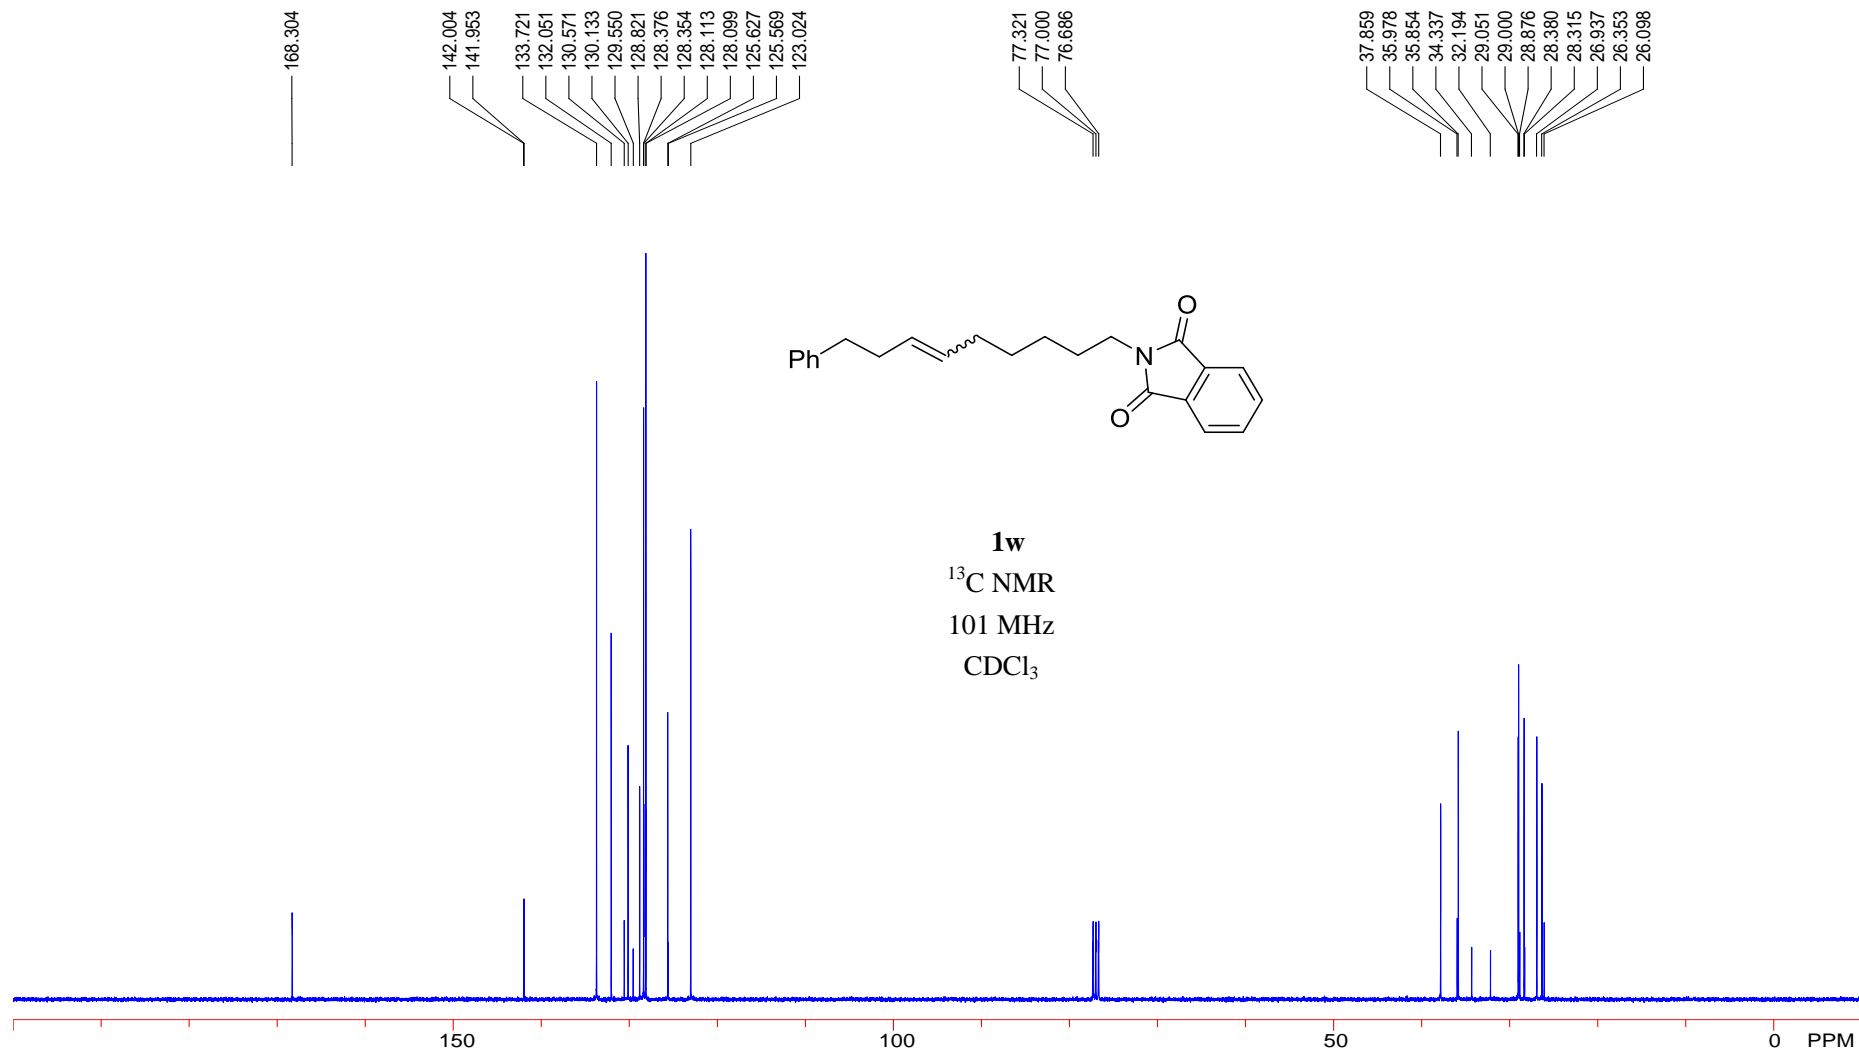

Supplementary Figure 93.  $^{13}\text{C}$  NMR spectrum for **1w**

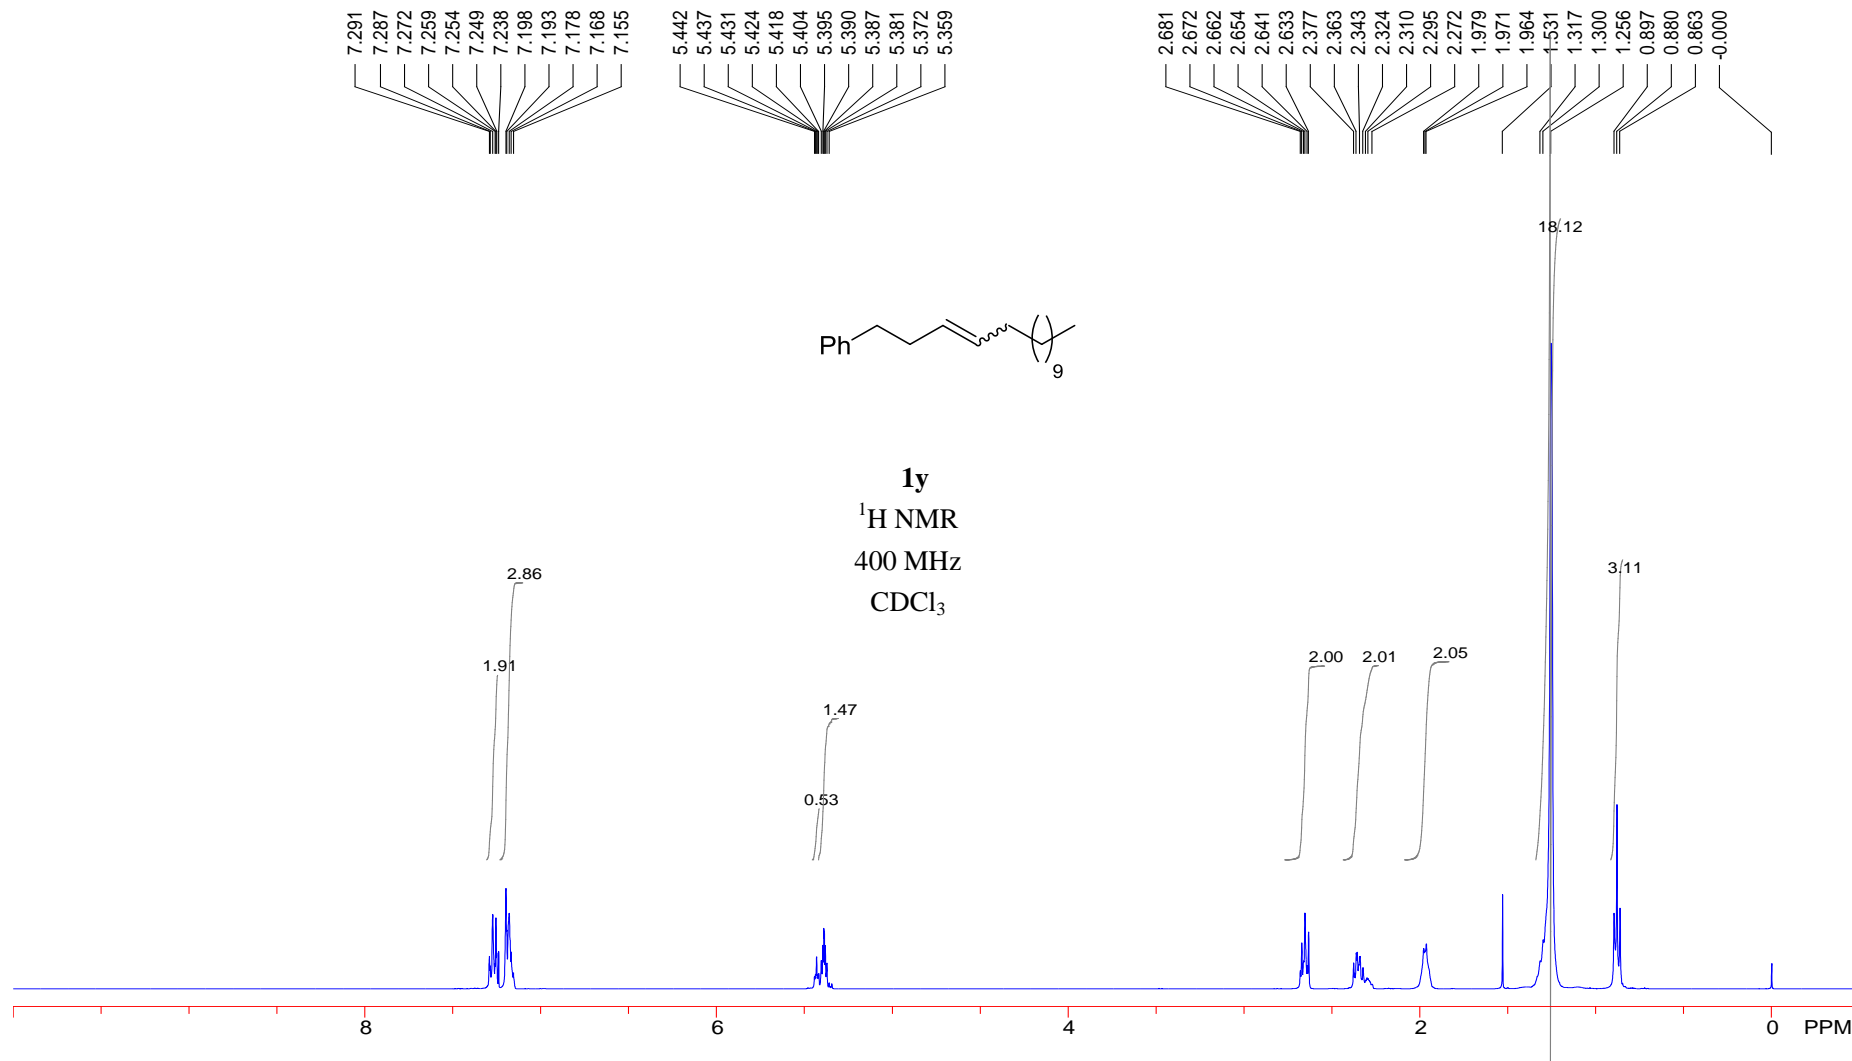

Supplementary Figure 94. <sup>1</sup>H NMR spectrum for **1y**

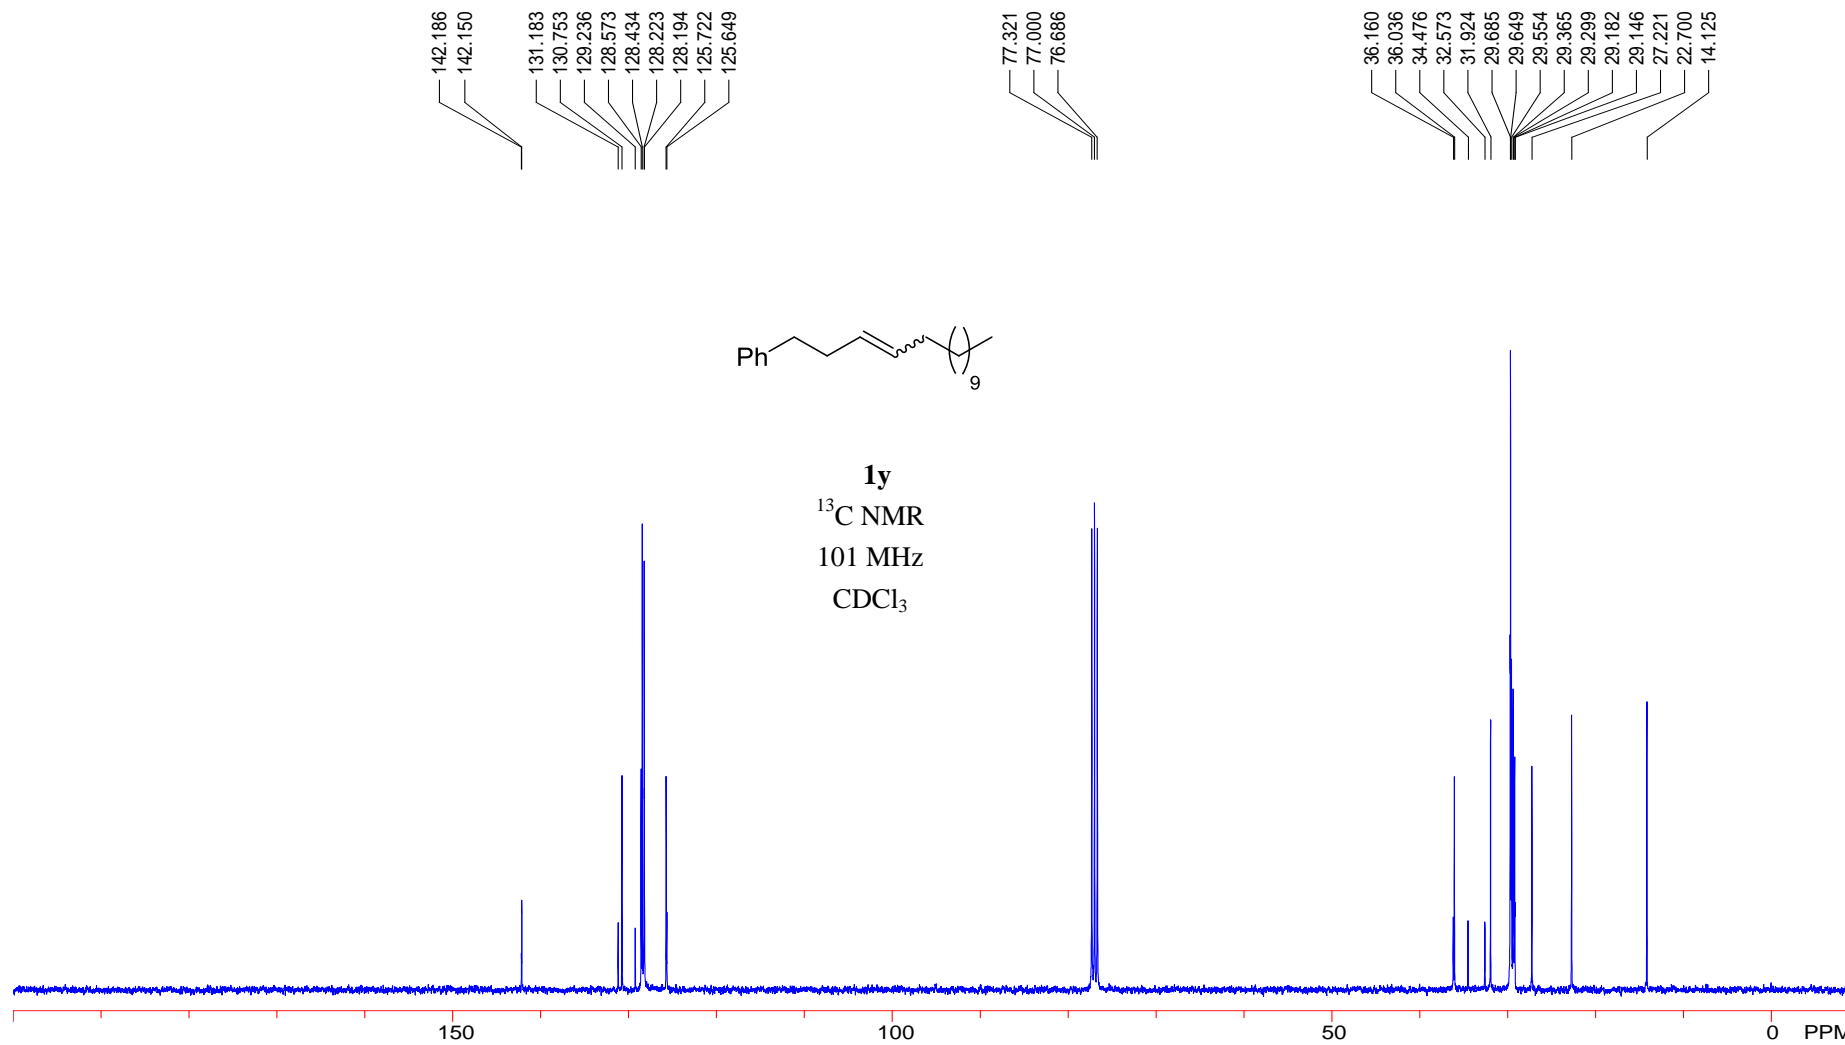

Supplementary Figure 95. <sup>13</sup>C NMR spectrum for **1y**



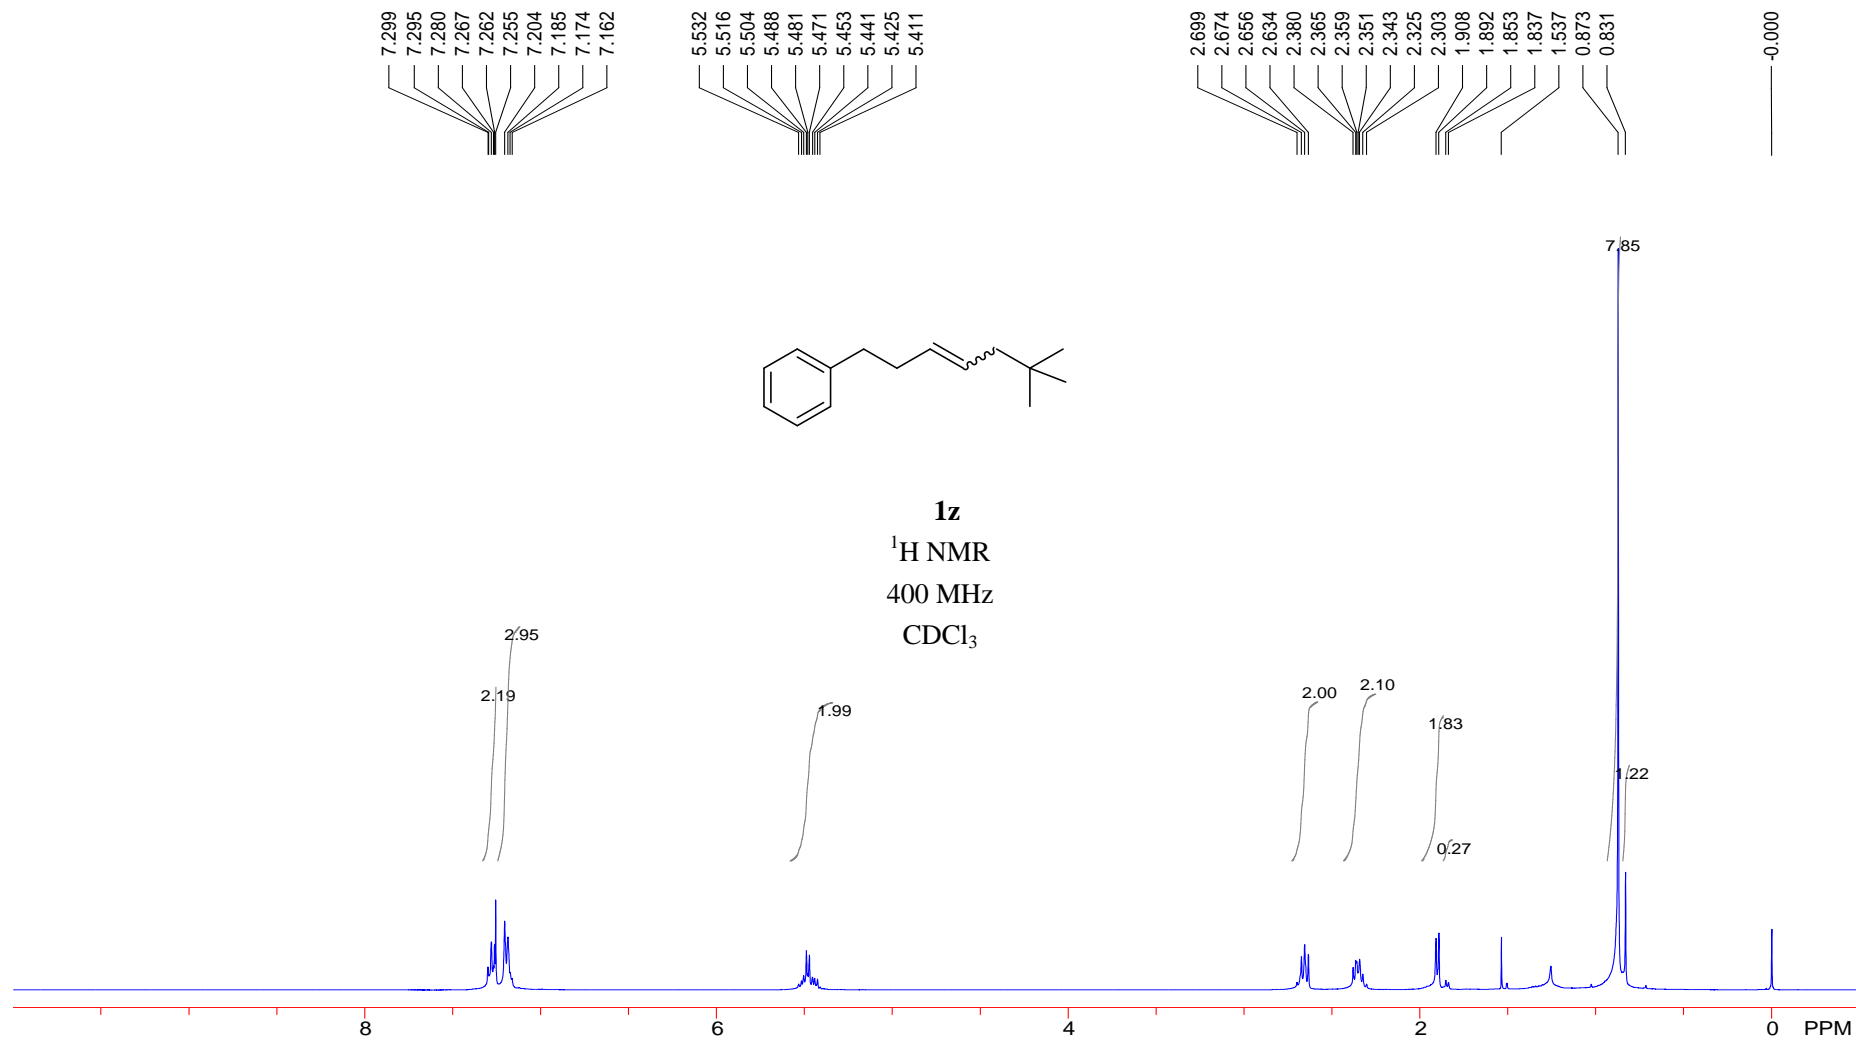

Supplementary Figure 96. <sup>1</sup>H NMR spectrum for **1z**

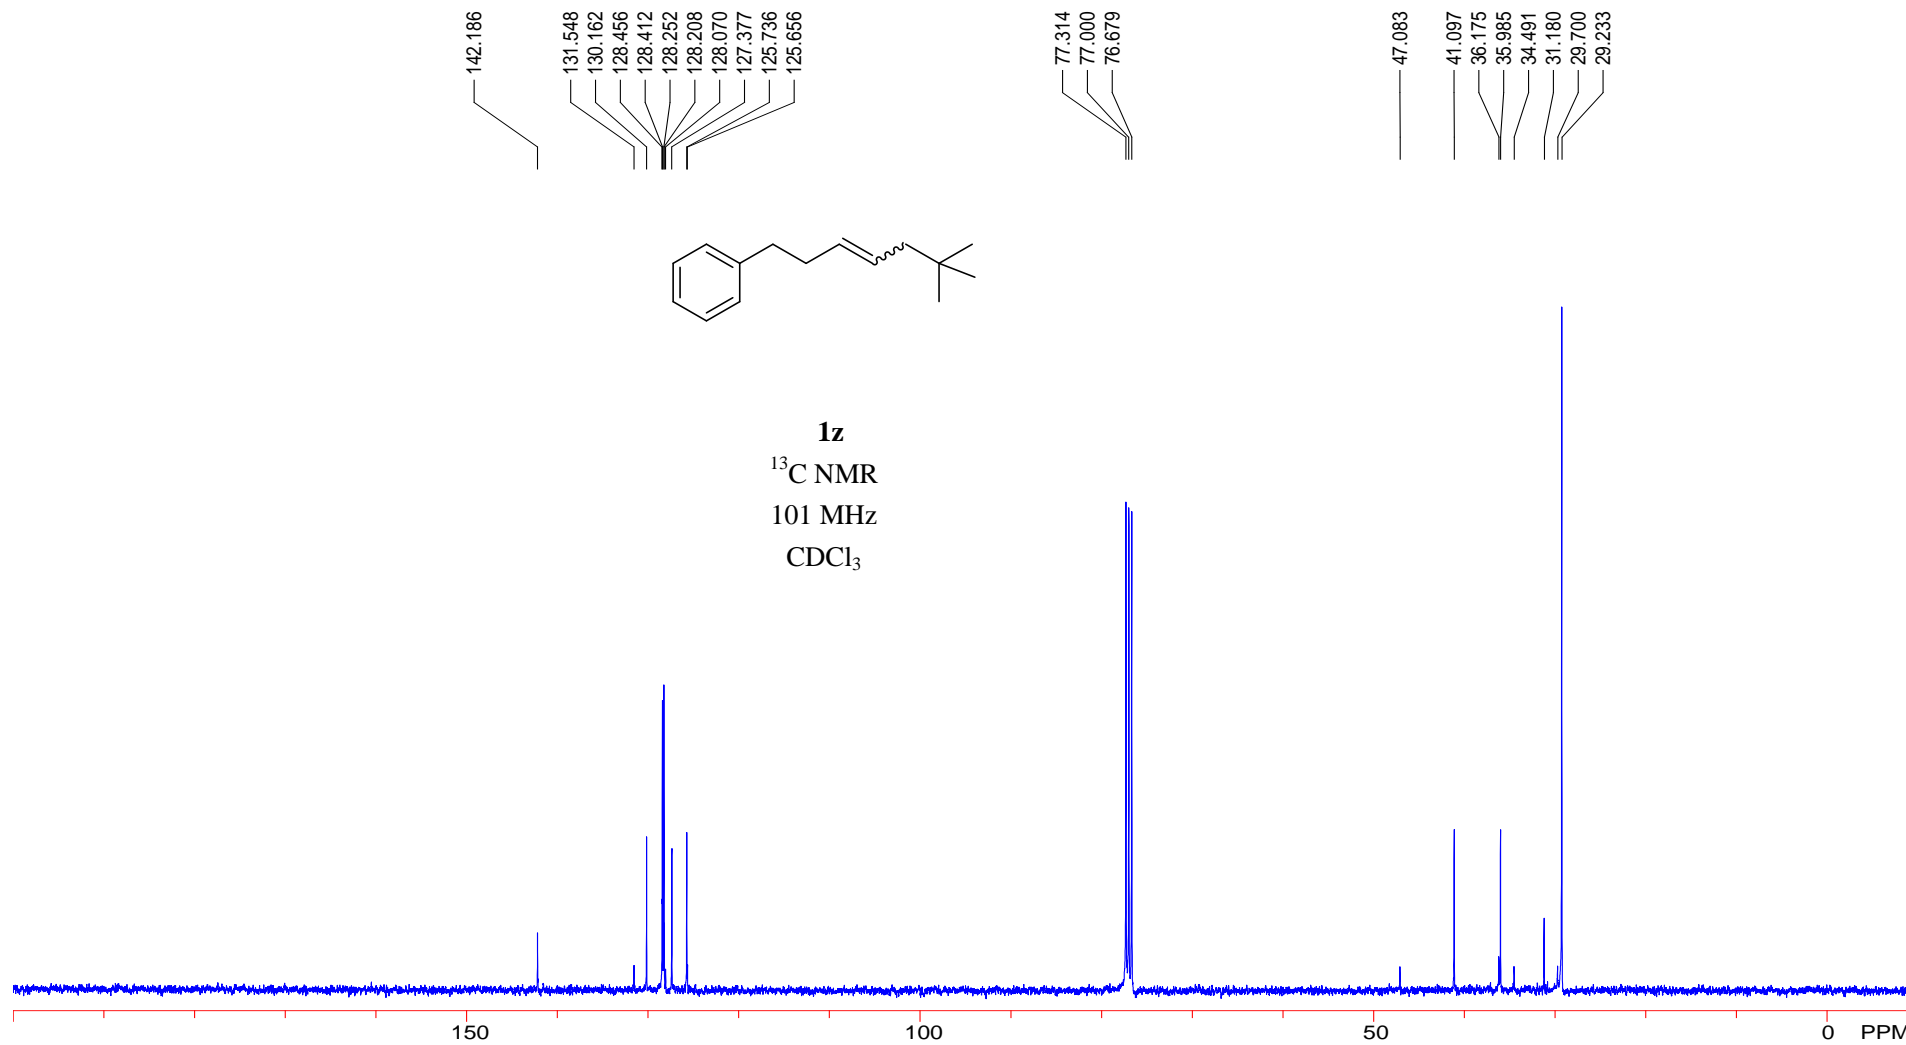

Supplementary Figure 97. <sup>13</sup>C NMR spectrum for **1z**

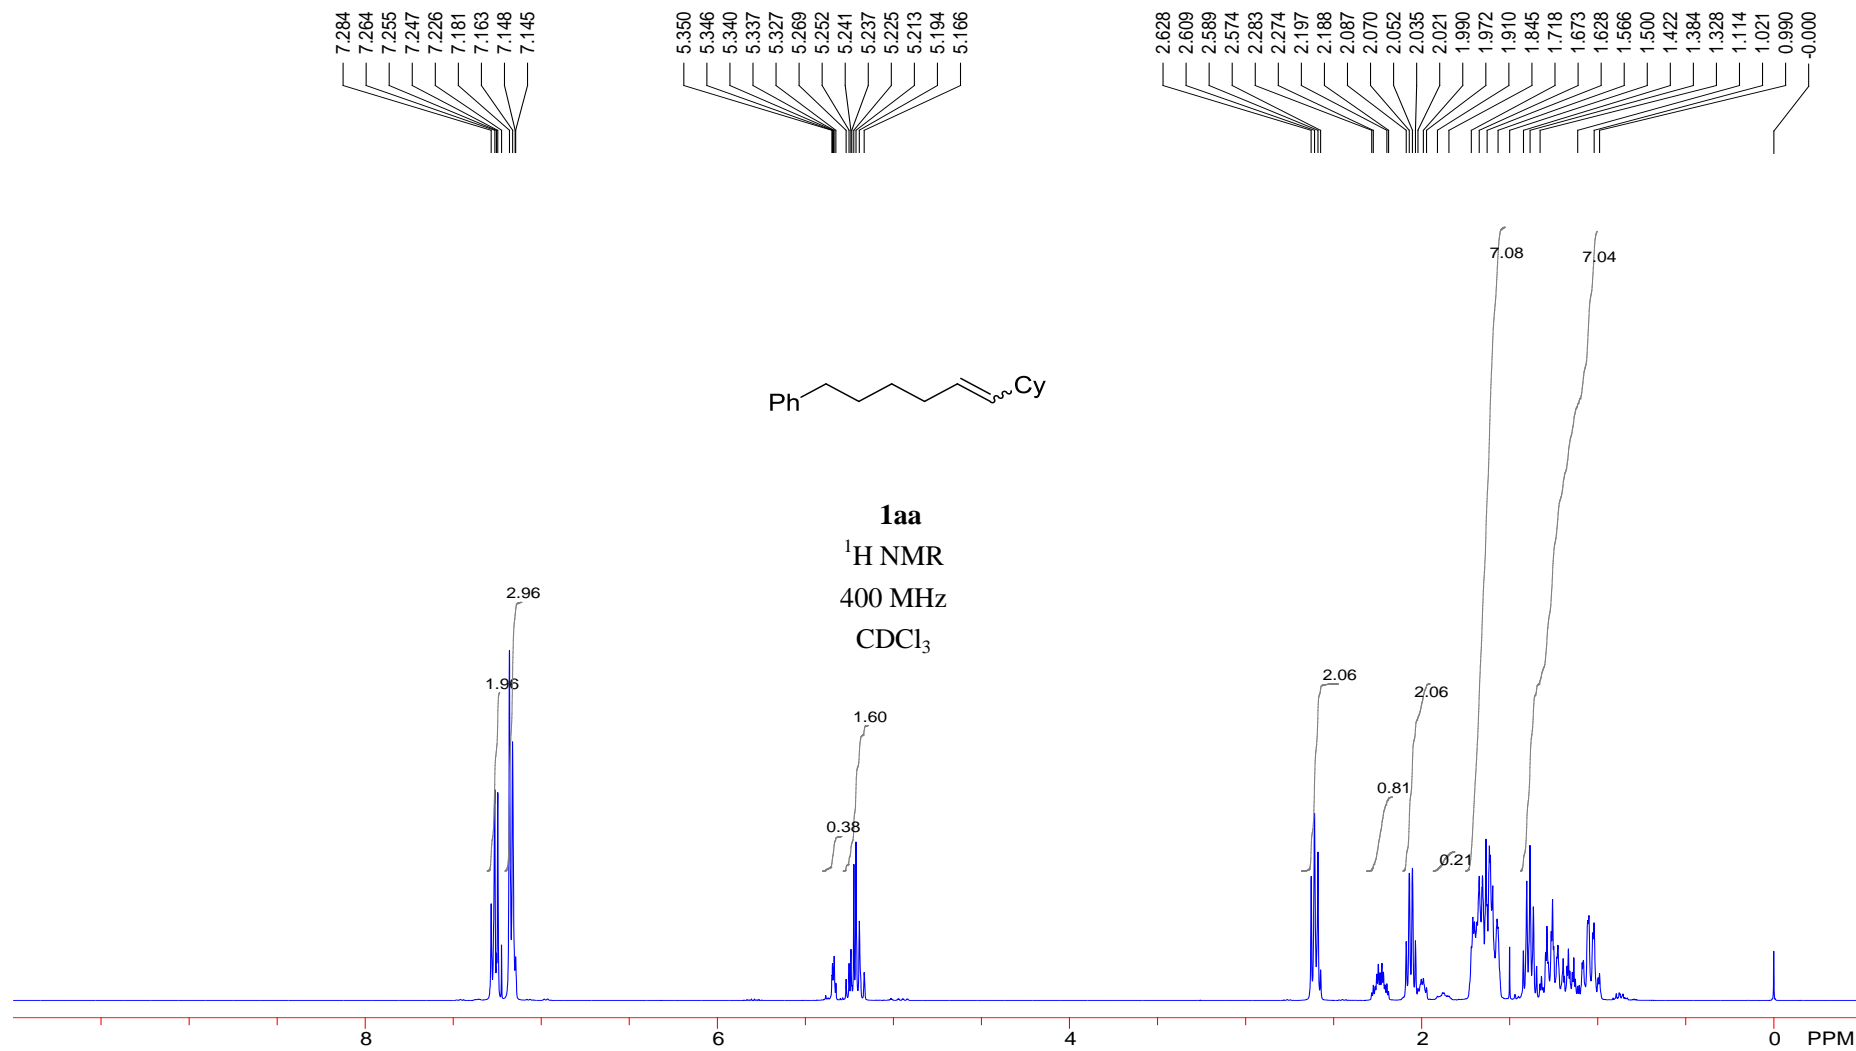

Supplementary Figure 98. <sup>1</sup>H NMR spectrum for **1aa**

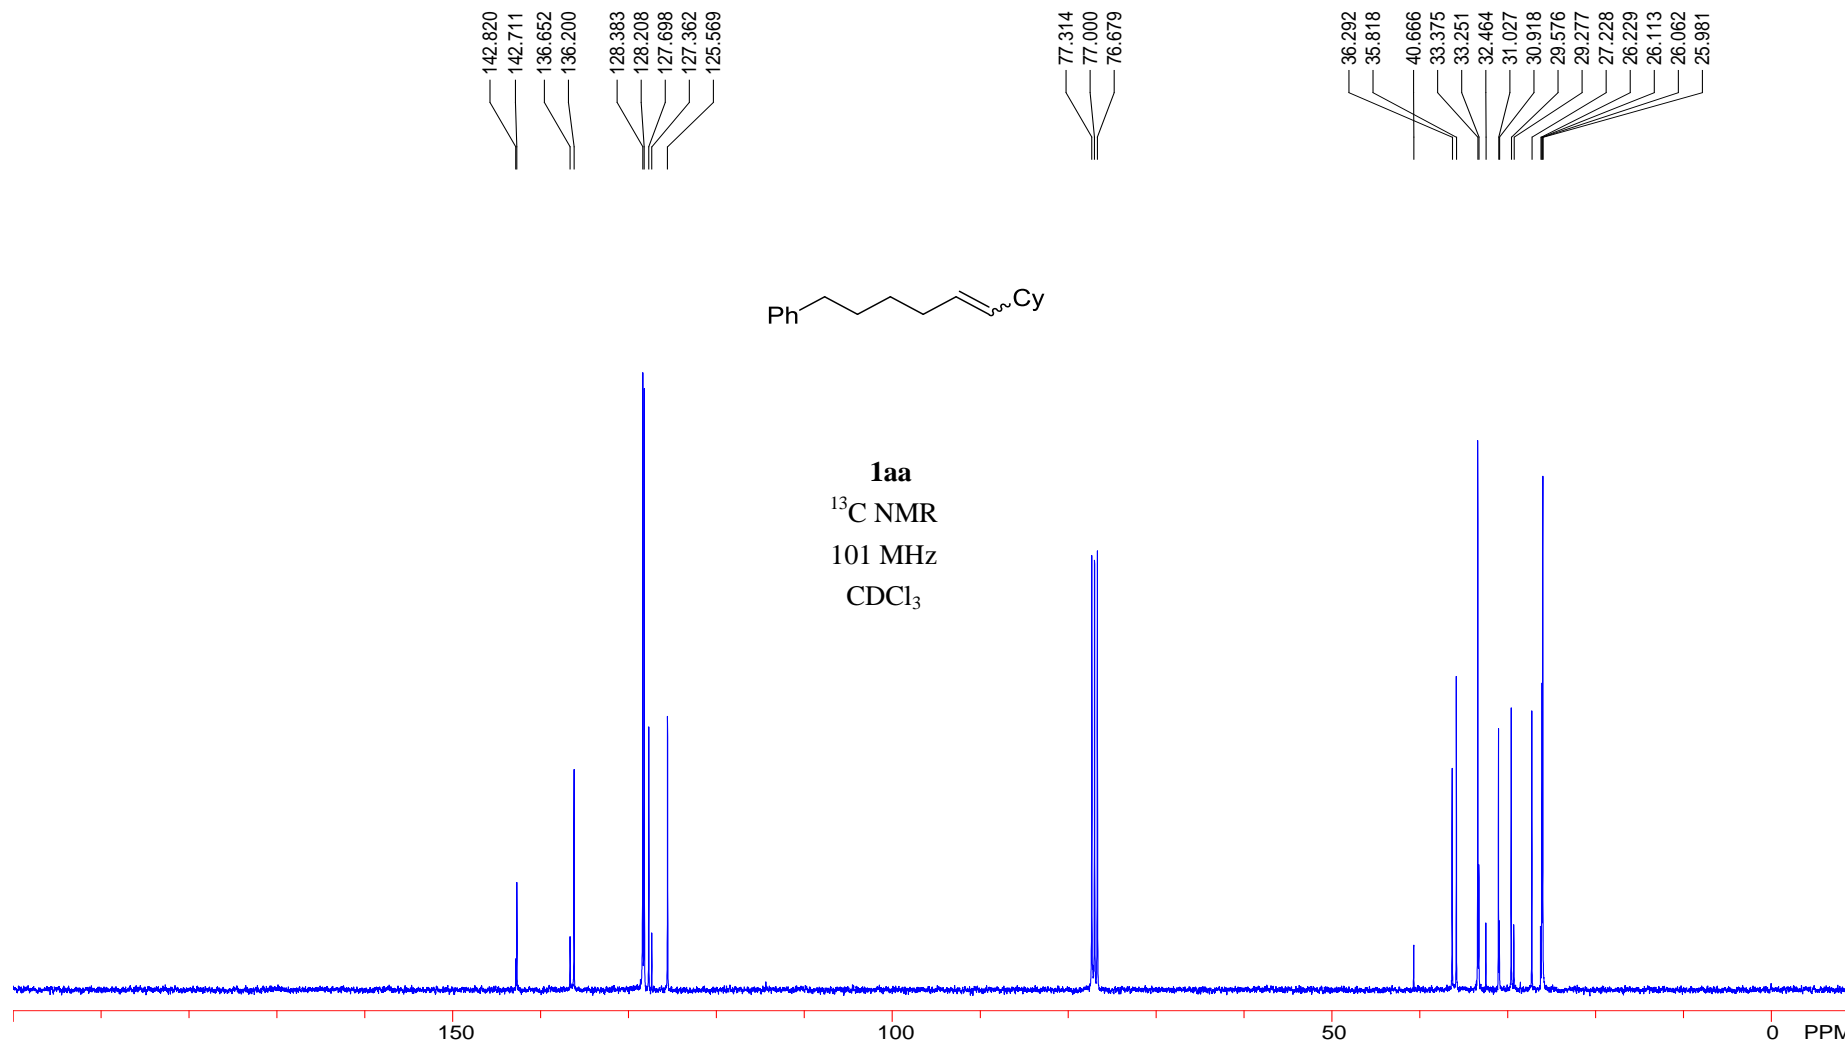

Supplementary Figure 99. <sup>13</sup>C NMR spectrum for **1aa**

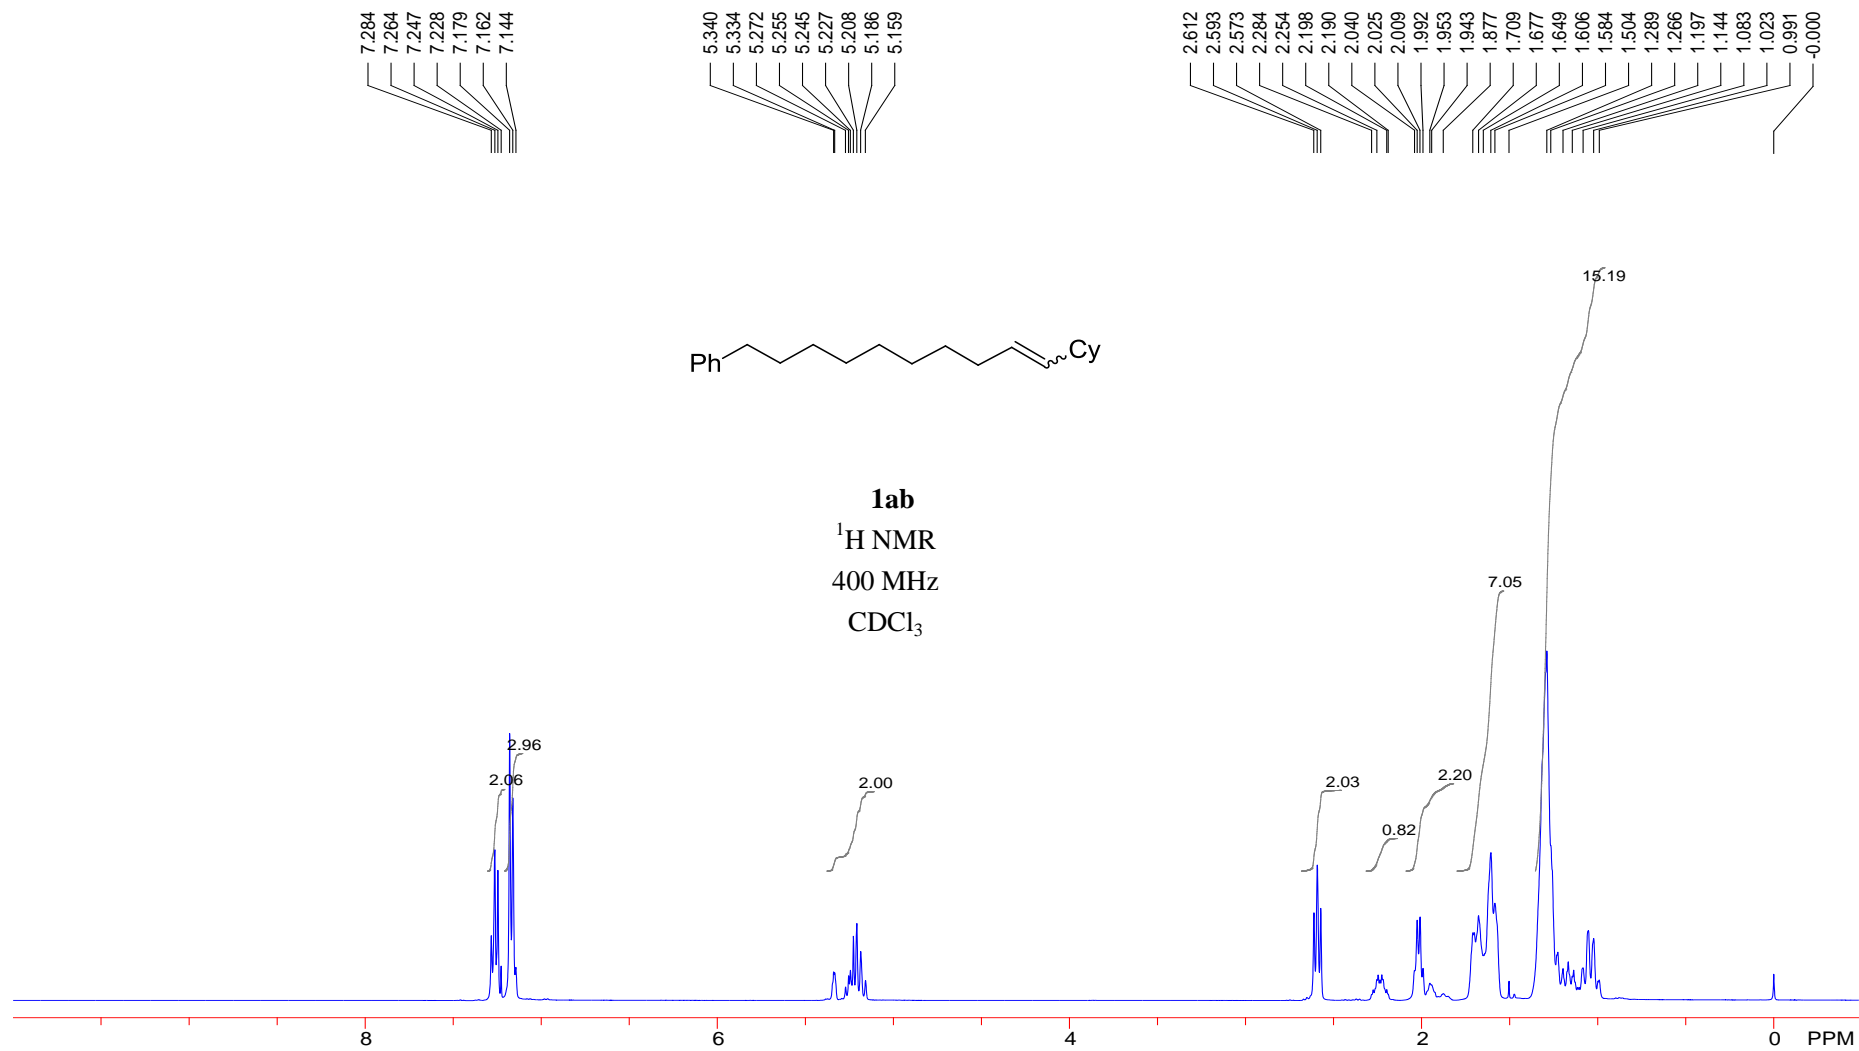

**Supplementary Figure 100.**  $^1\text{H}$  NMR spectrum for **1ab**

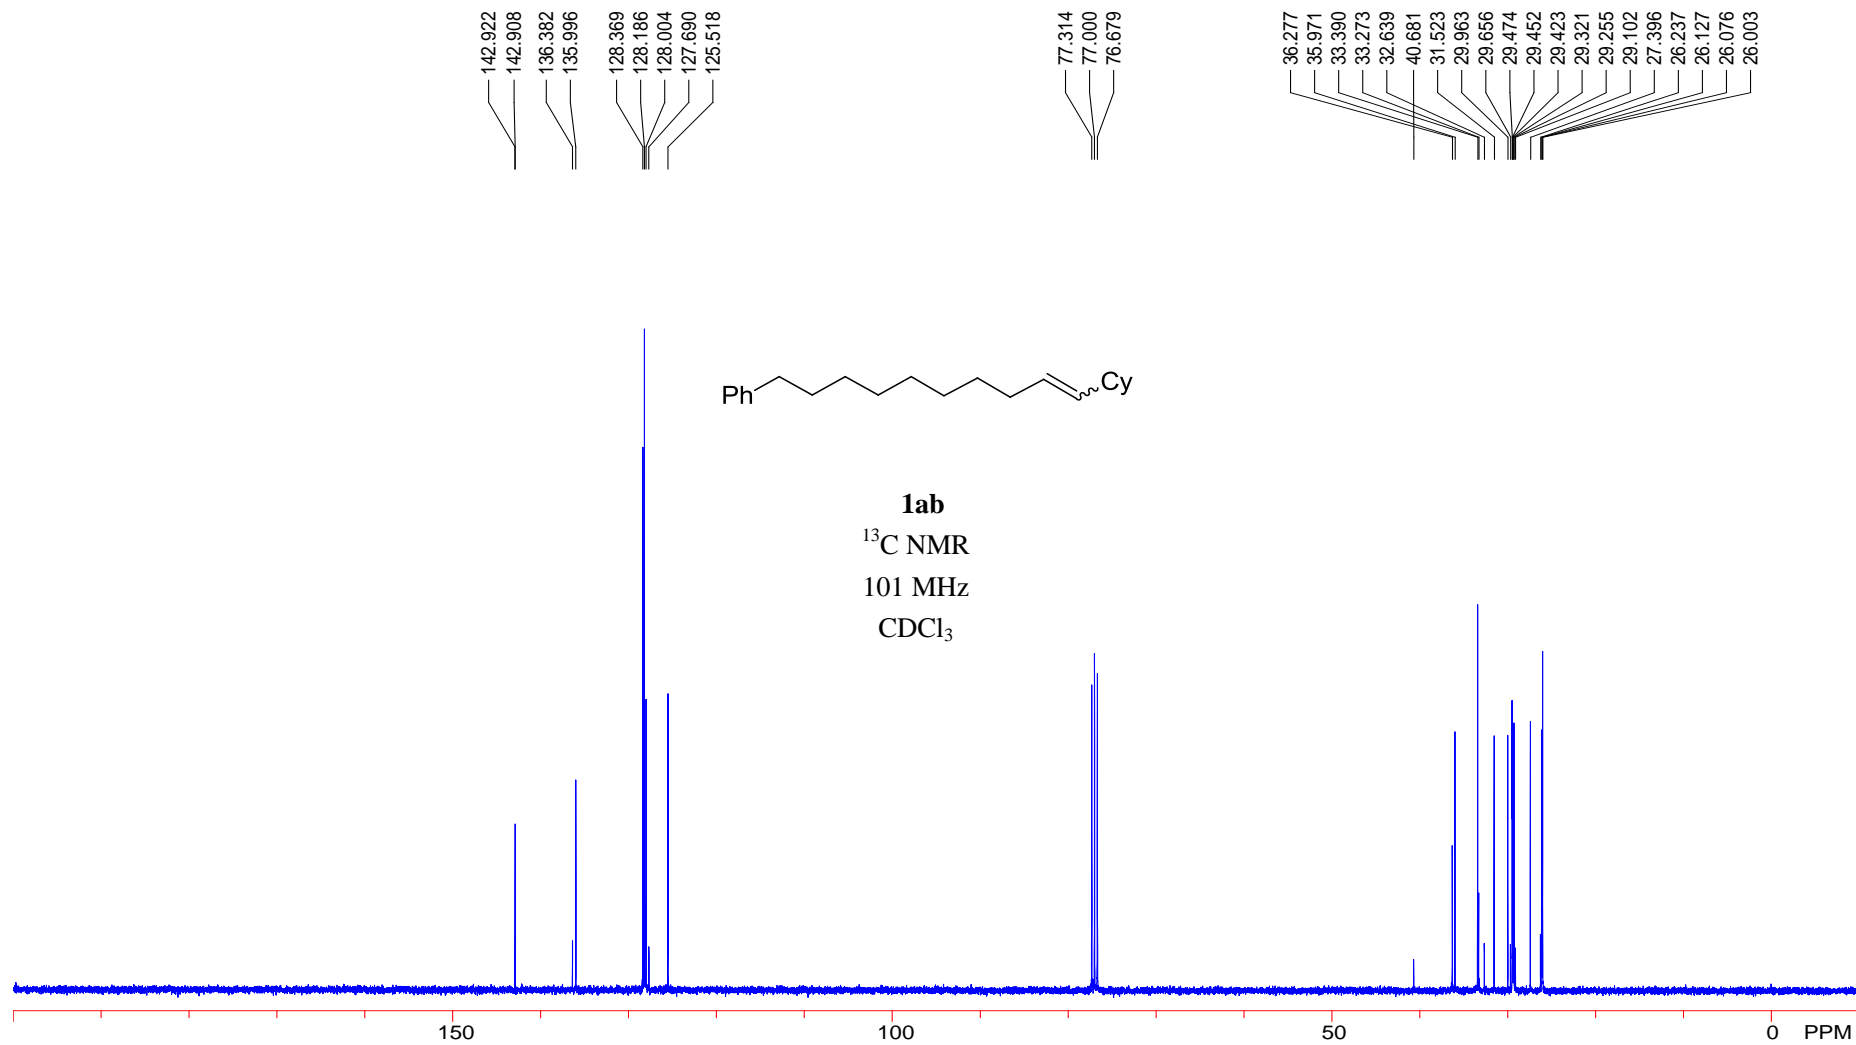

Supplementary Figure 101. <sup>13</sup>C NMR spectrum for **1ab**

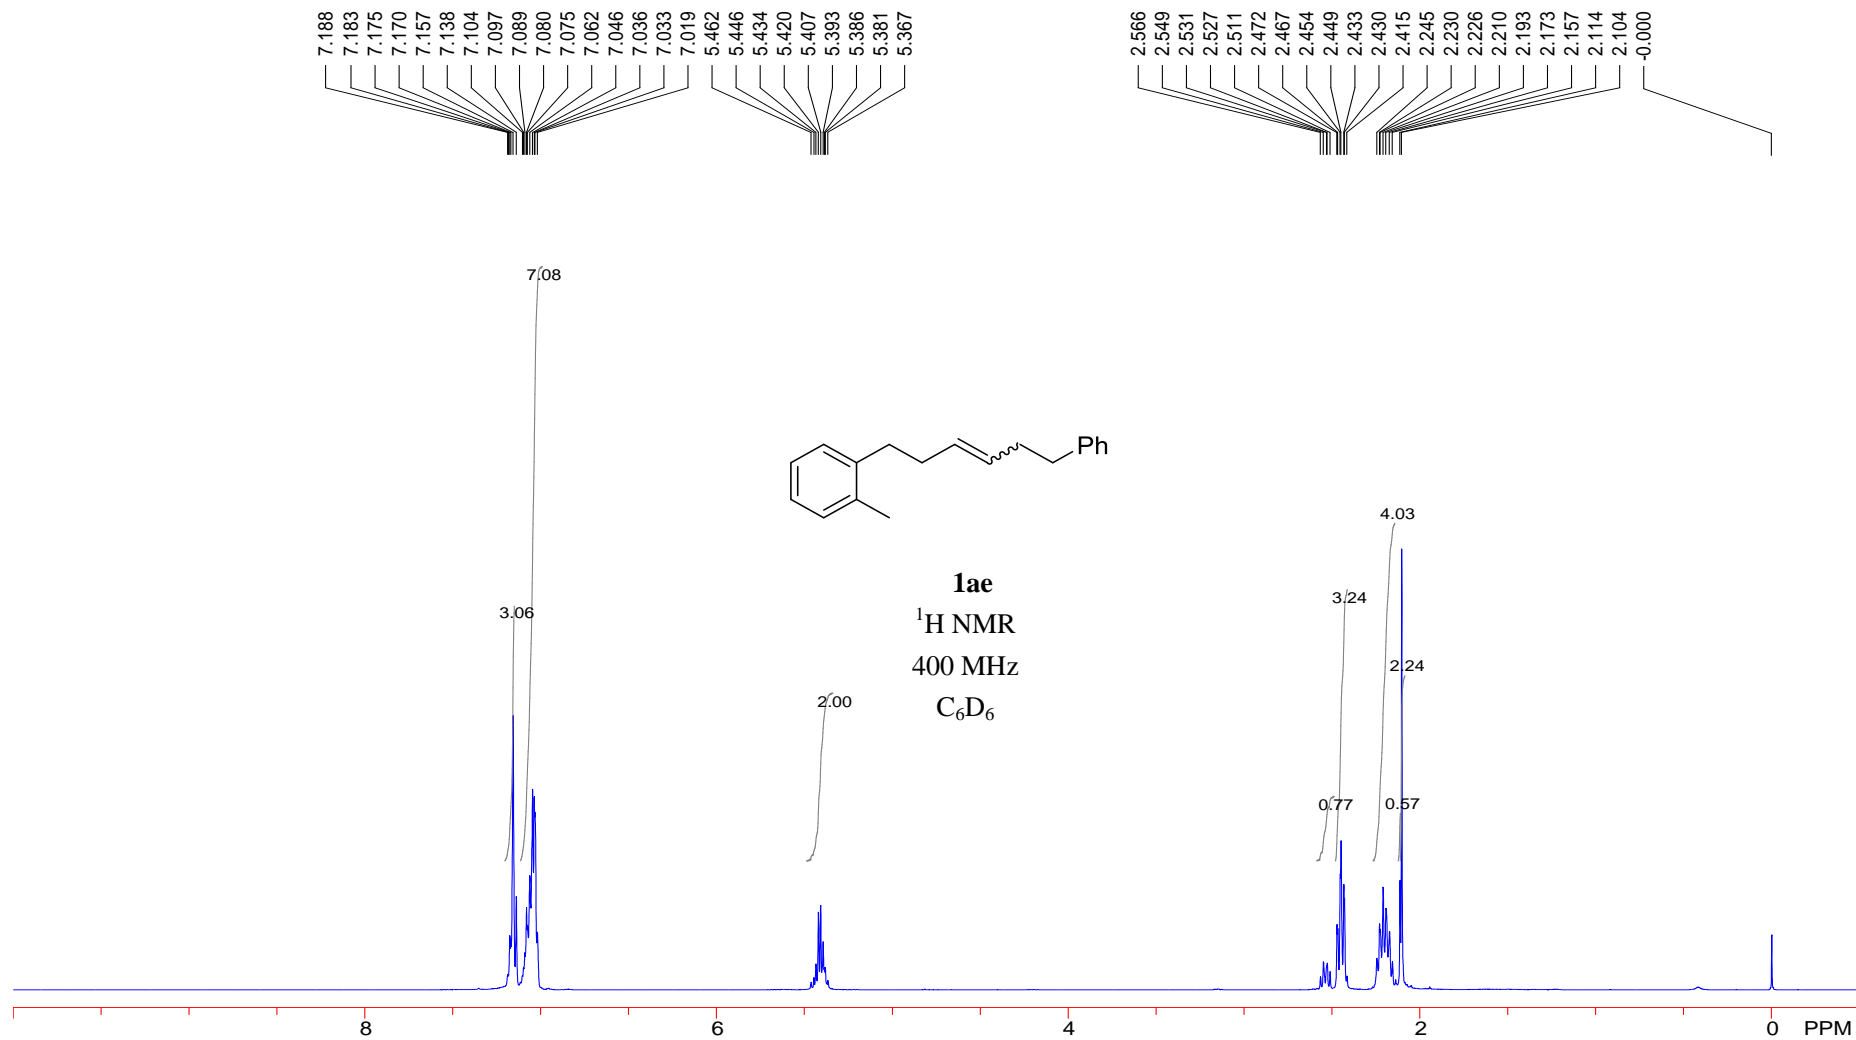

Supplementary Figure 102. <sup>1</sup>H NMR spectrum for **1ae**

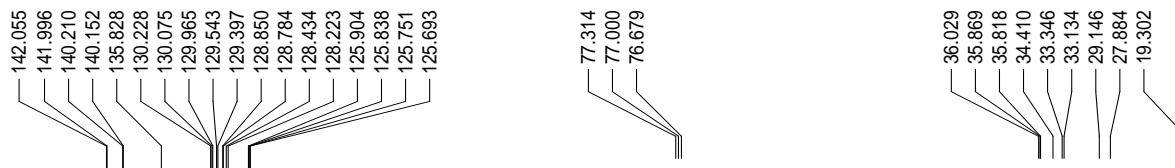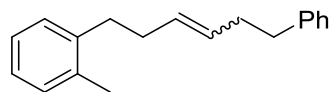

**1ae**

<sup>13</sup>C NMR

101 MHz

CDCl<sub>3</sub>

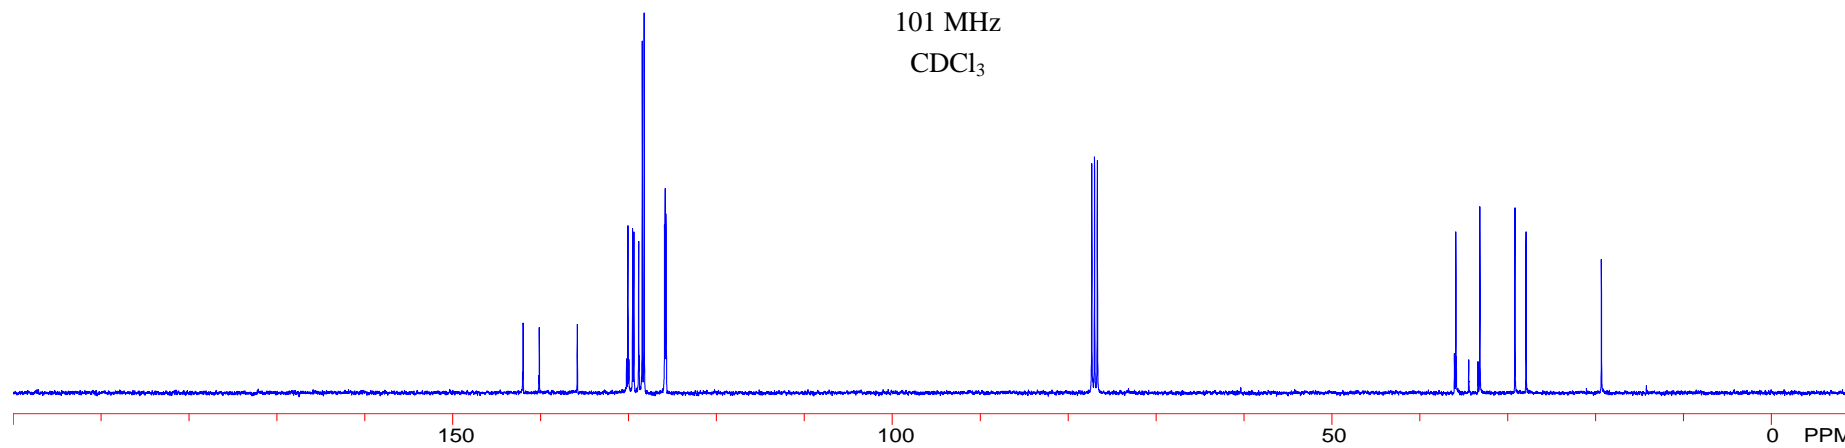

**Supplementary Figure 103.** <sup>13</sup>C NMR spectrum for **1ae**



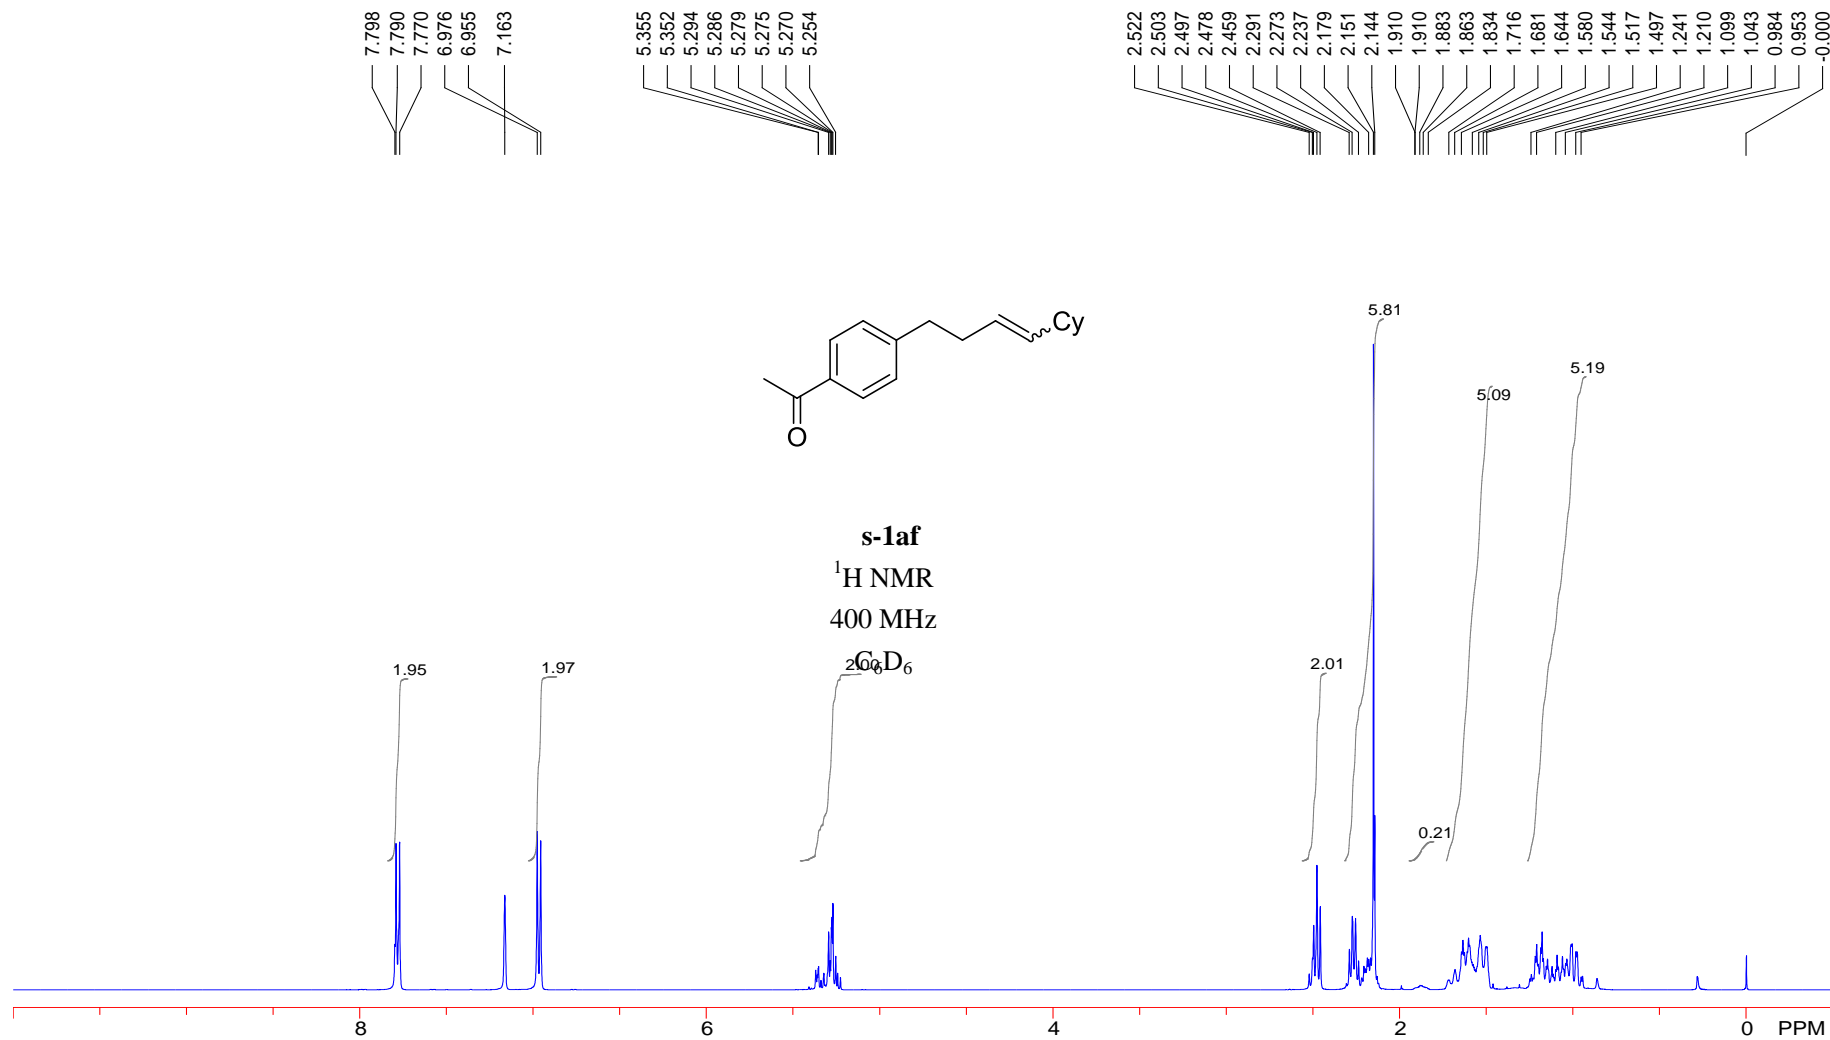

Supplementary Figure 104.  $^1\text{H NMR}$  spectrum for s-1af

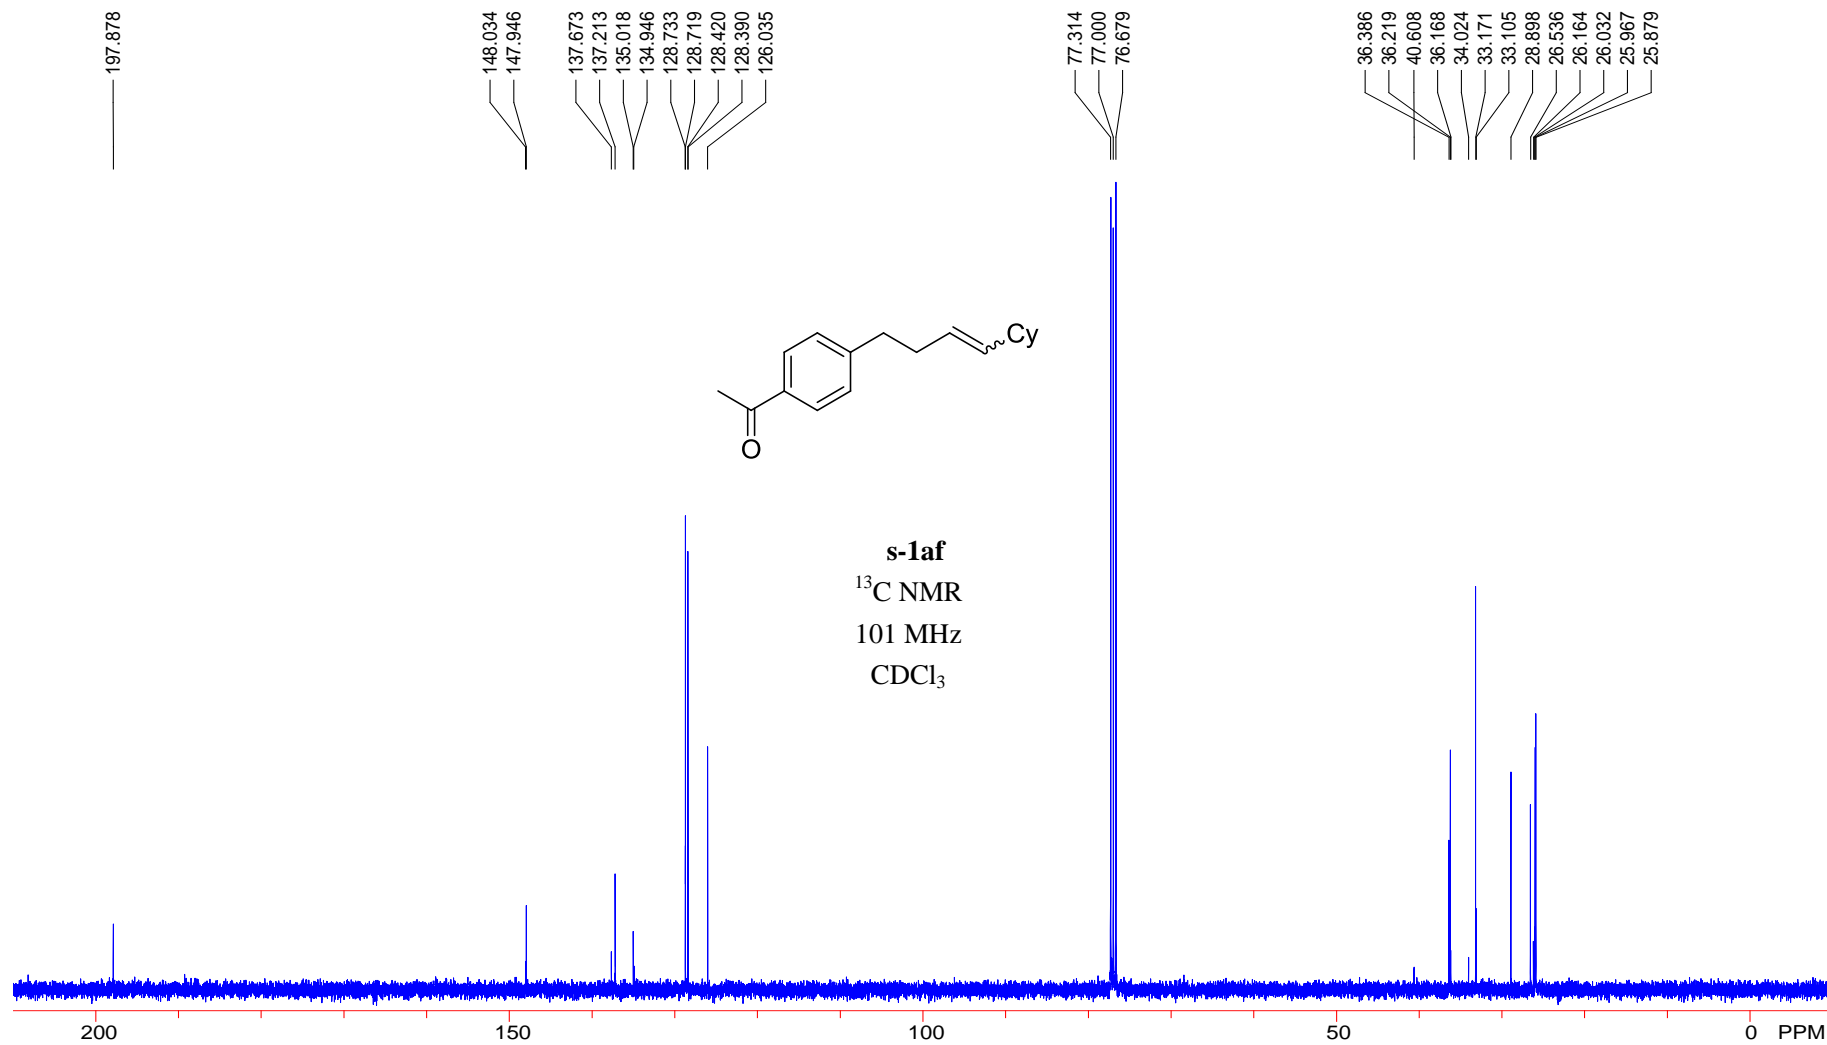

**Supplementary Figure 105.** <sup>13</sup>C NMR spectrum for **s-1af**

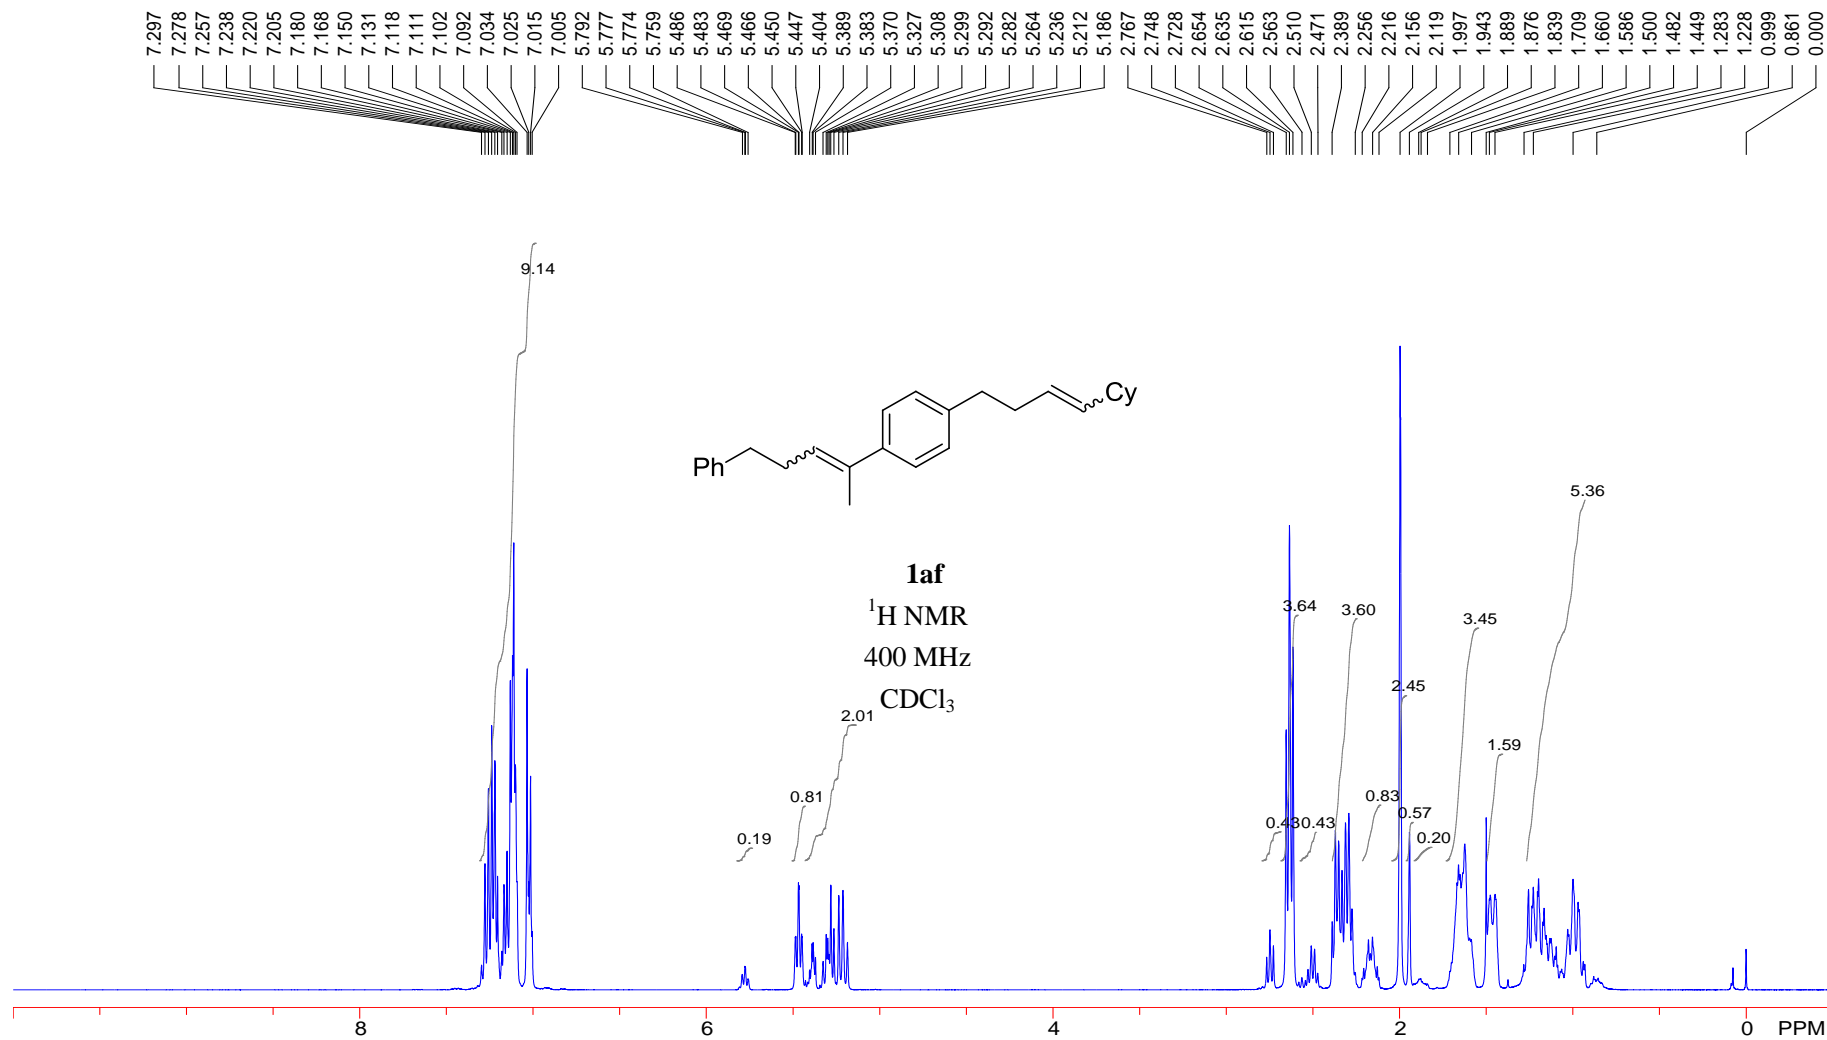

Supplementary Figure 106. <sup>1</sup>H NMR spectrum for **1af**

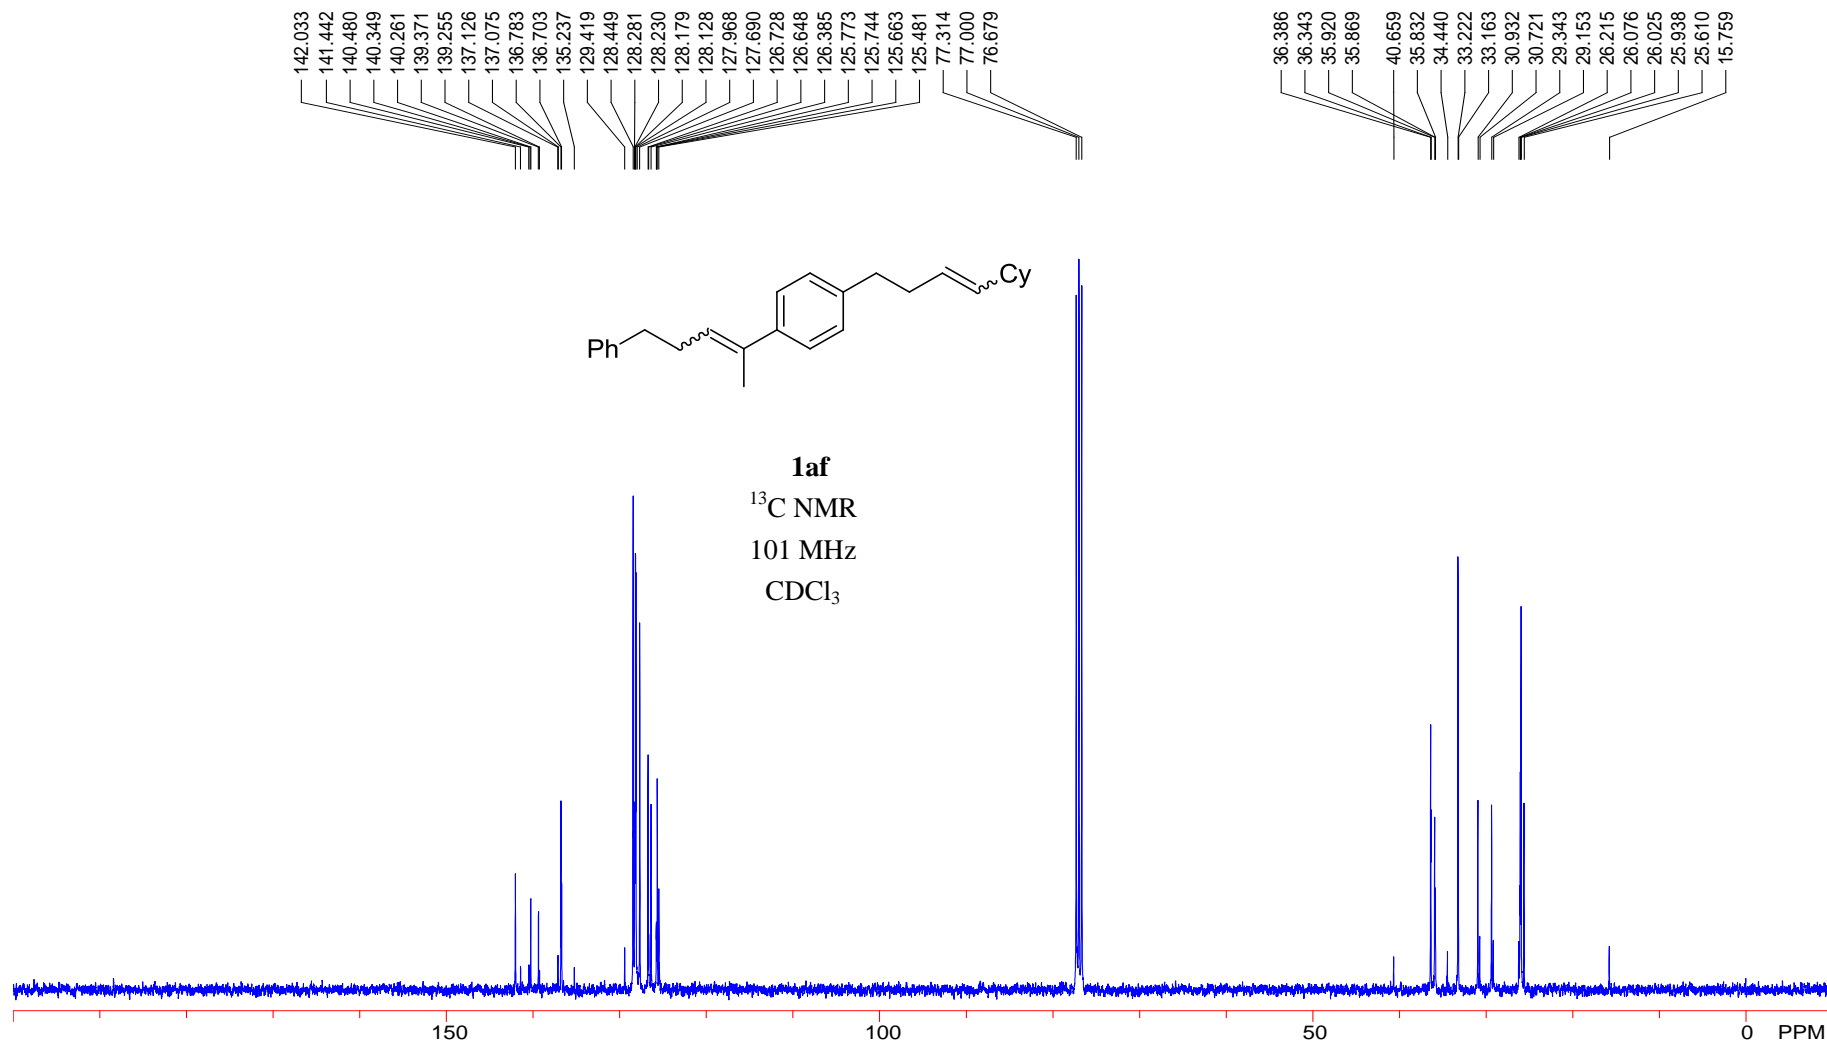

Supplementary Figure 107. <sup>13</sup>C NMR spectrum for **1af**

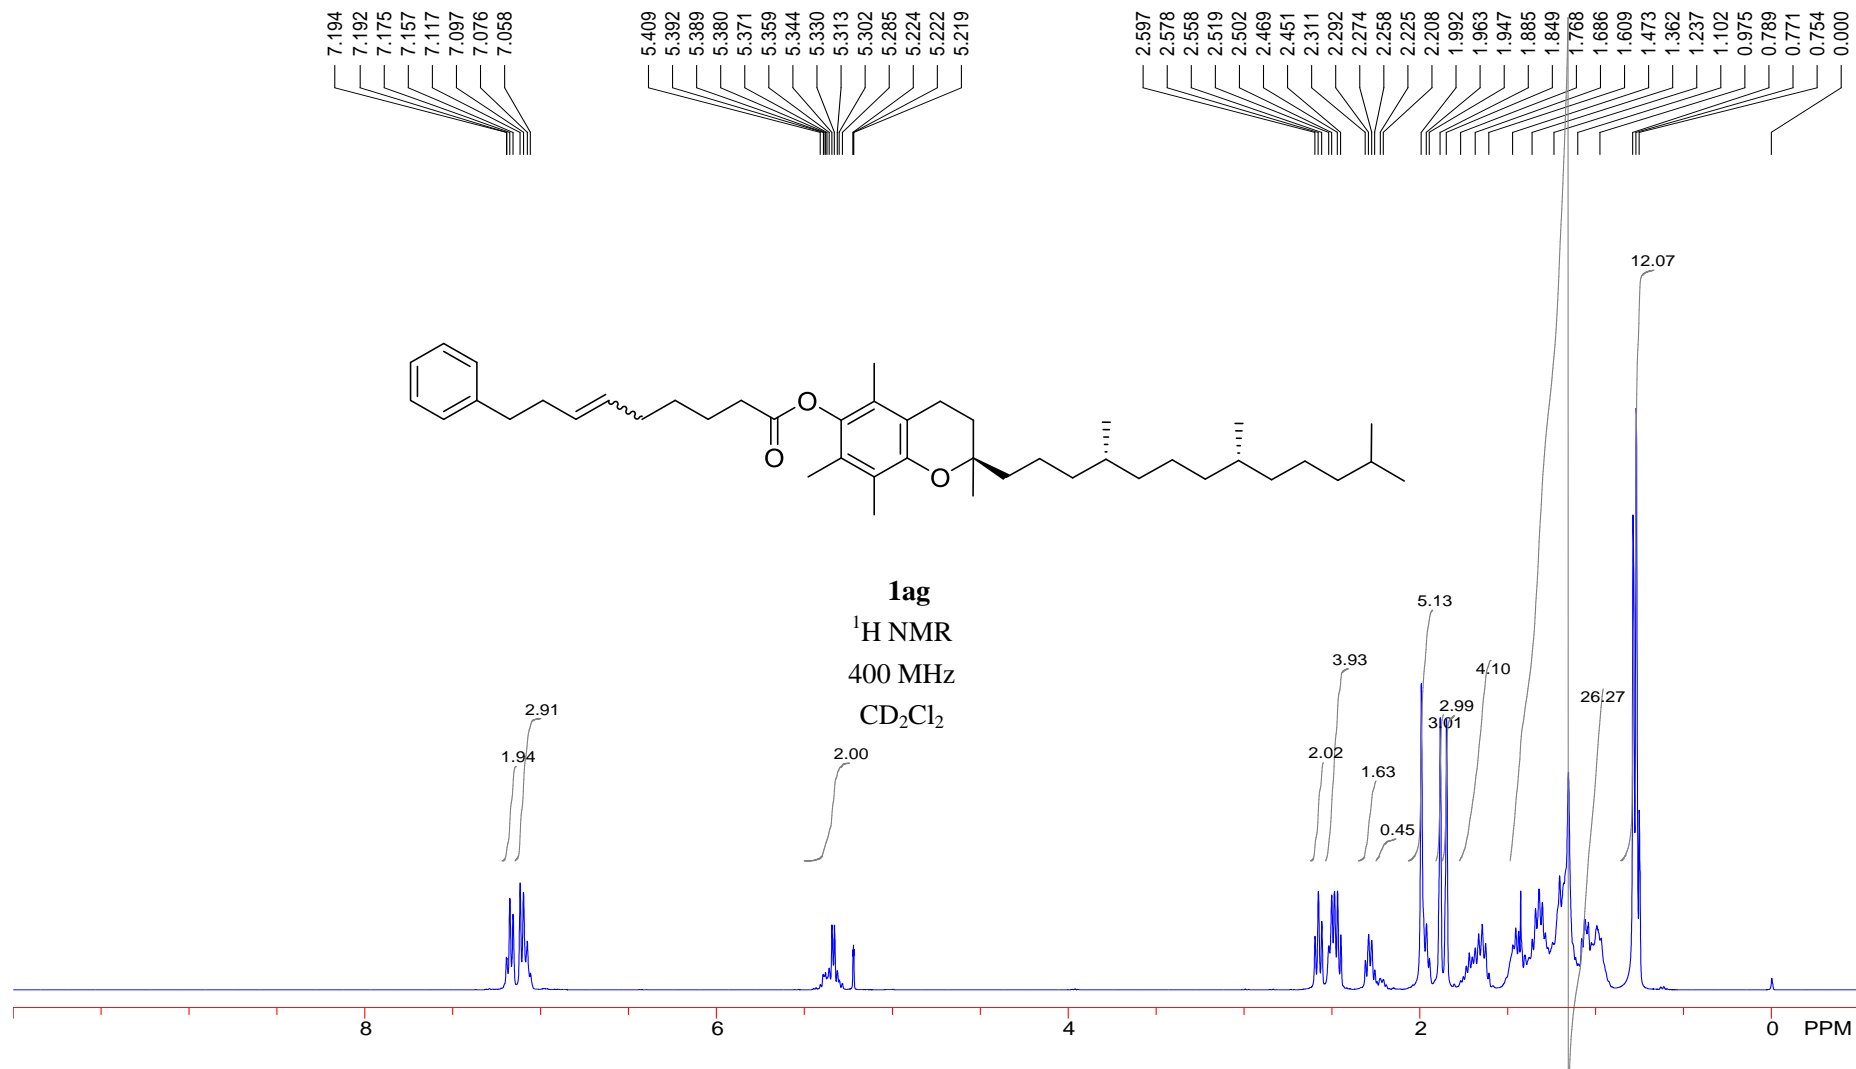

Supplementary Figure 108. <sup>1</sup>H NMR spectrum for **1ag**

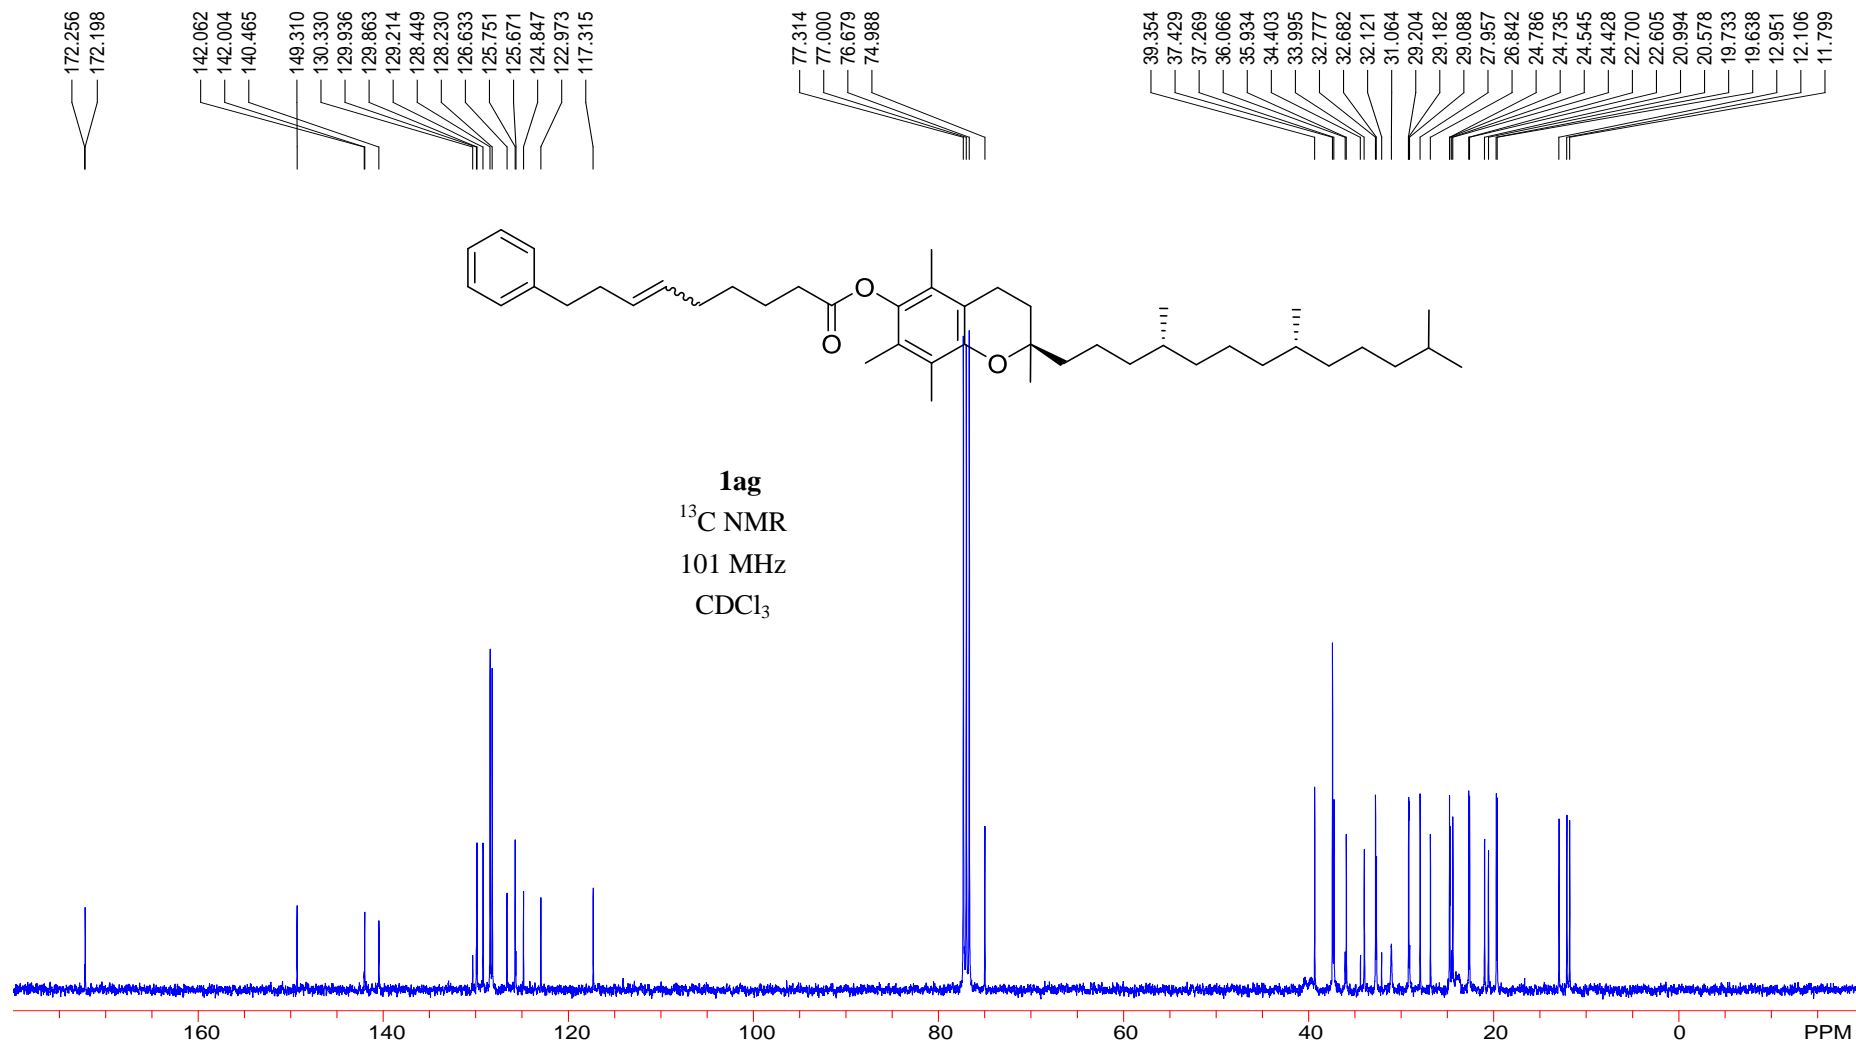

Supplementary Figure 103. <sup>13</sup>C NMR spectrum for **1ag**

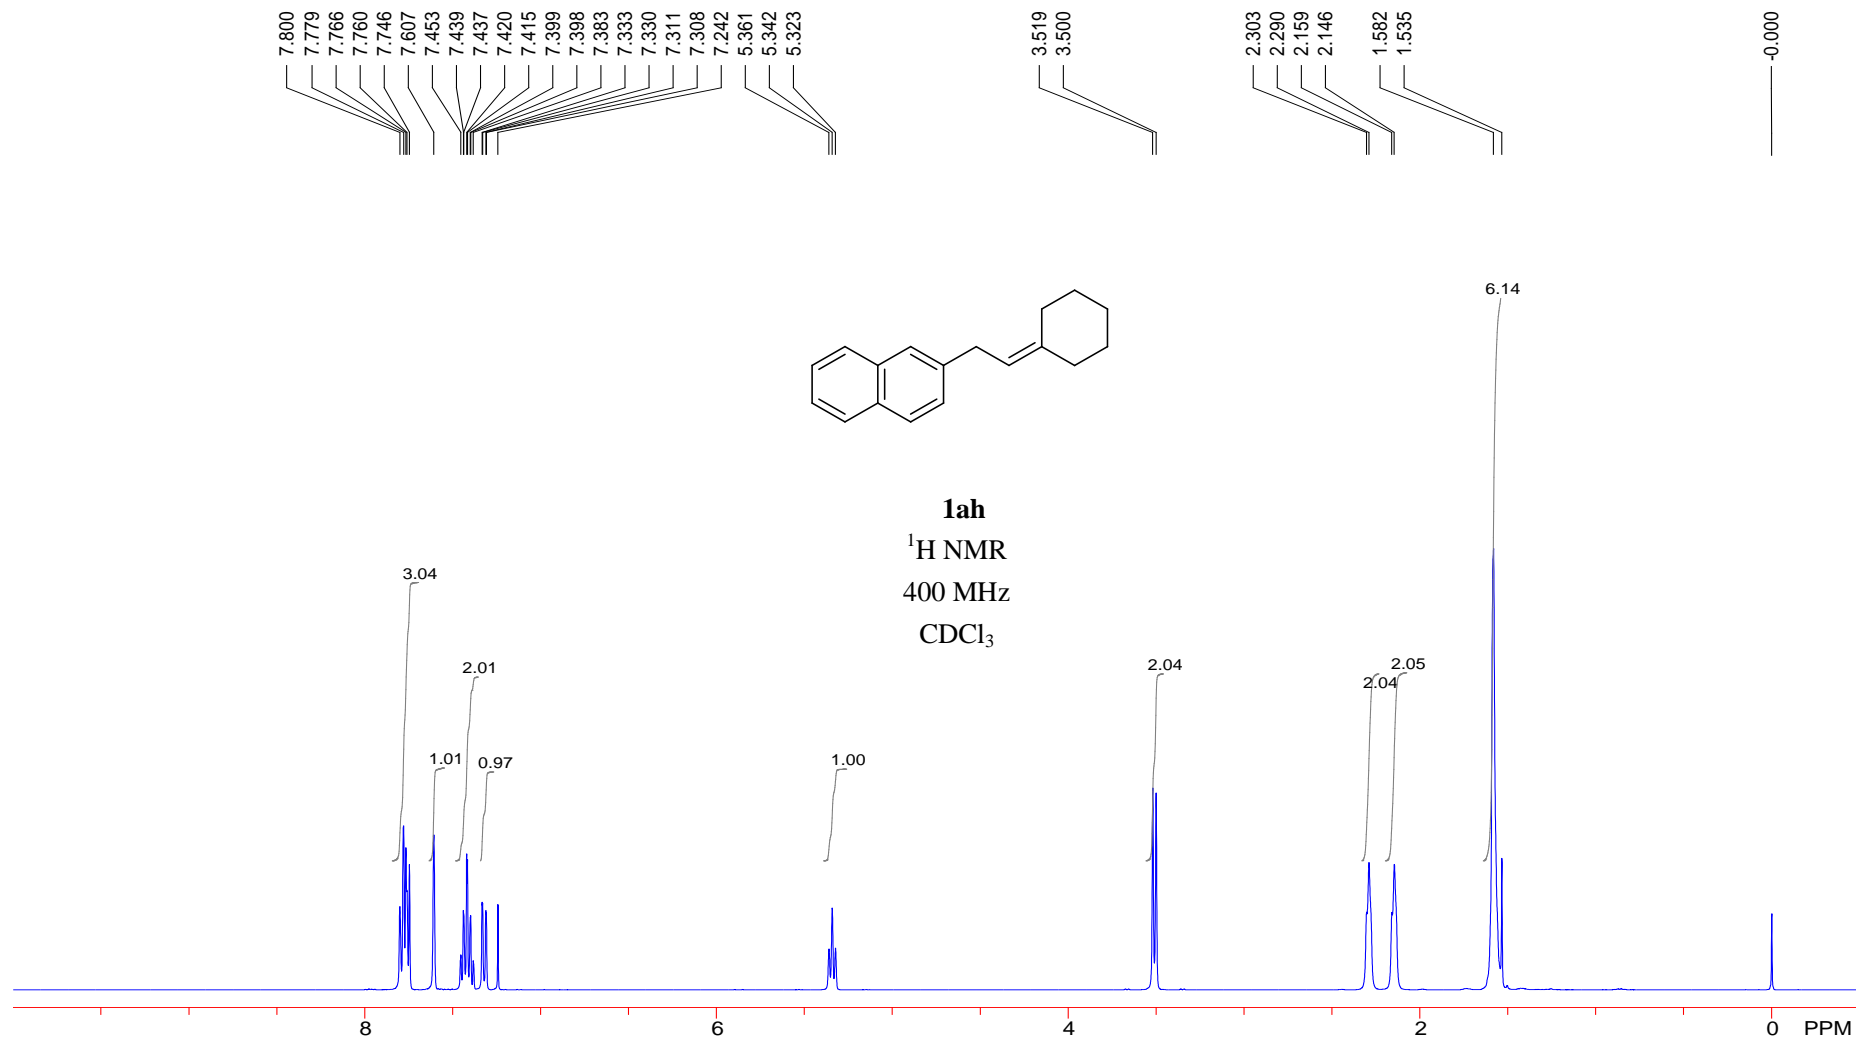

Supplementary Figure 110. <sup>1</sup>H NMR spectrum for **1ah**

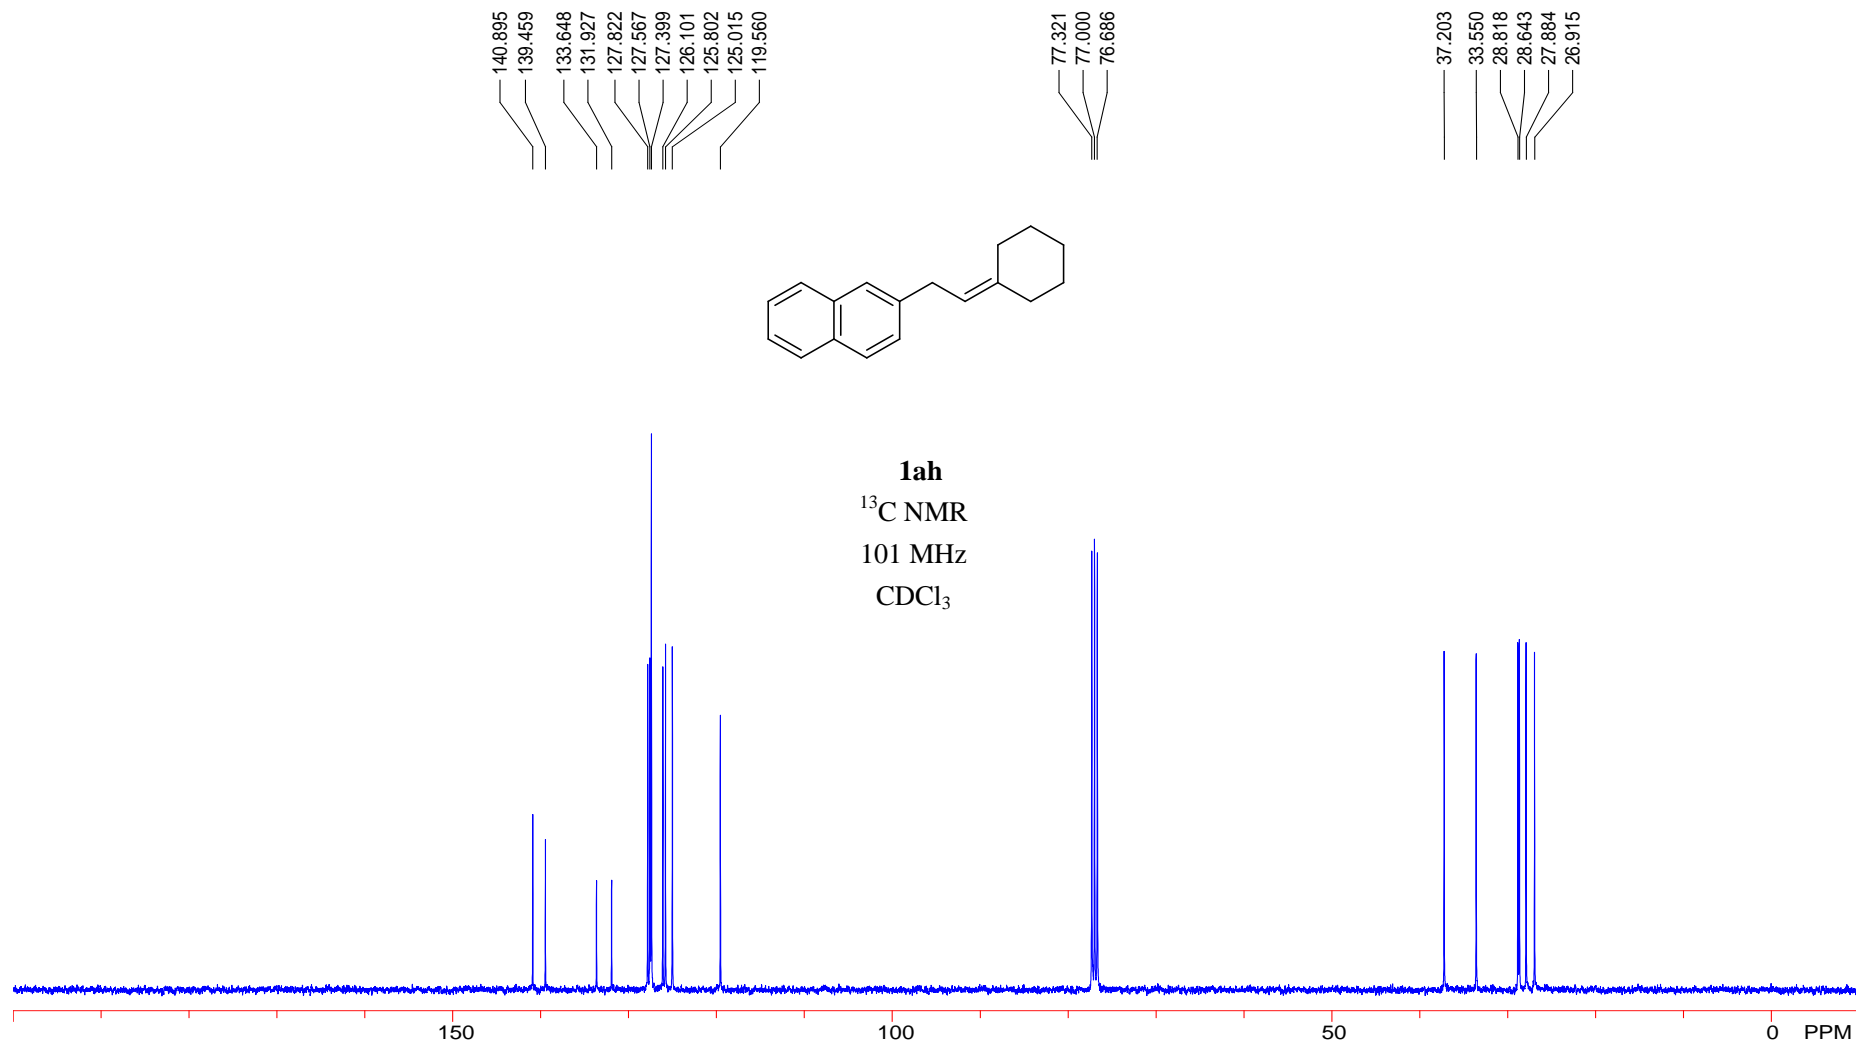

Supplementary Figure 111. <sup>13</sup>C NMR spectrum for **1ah**



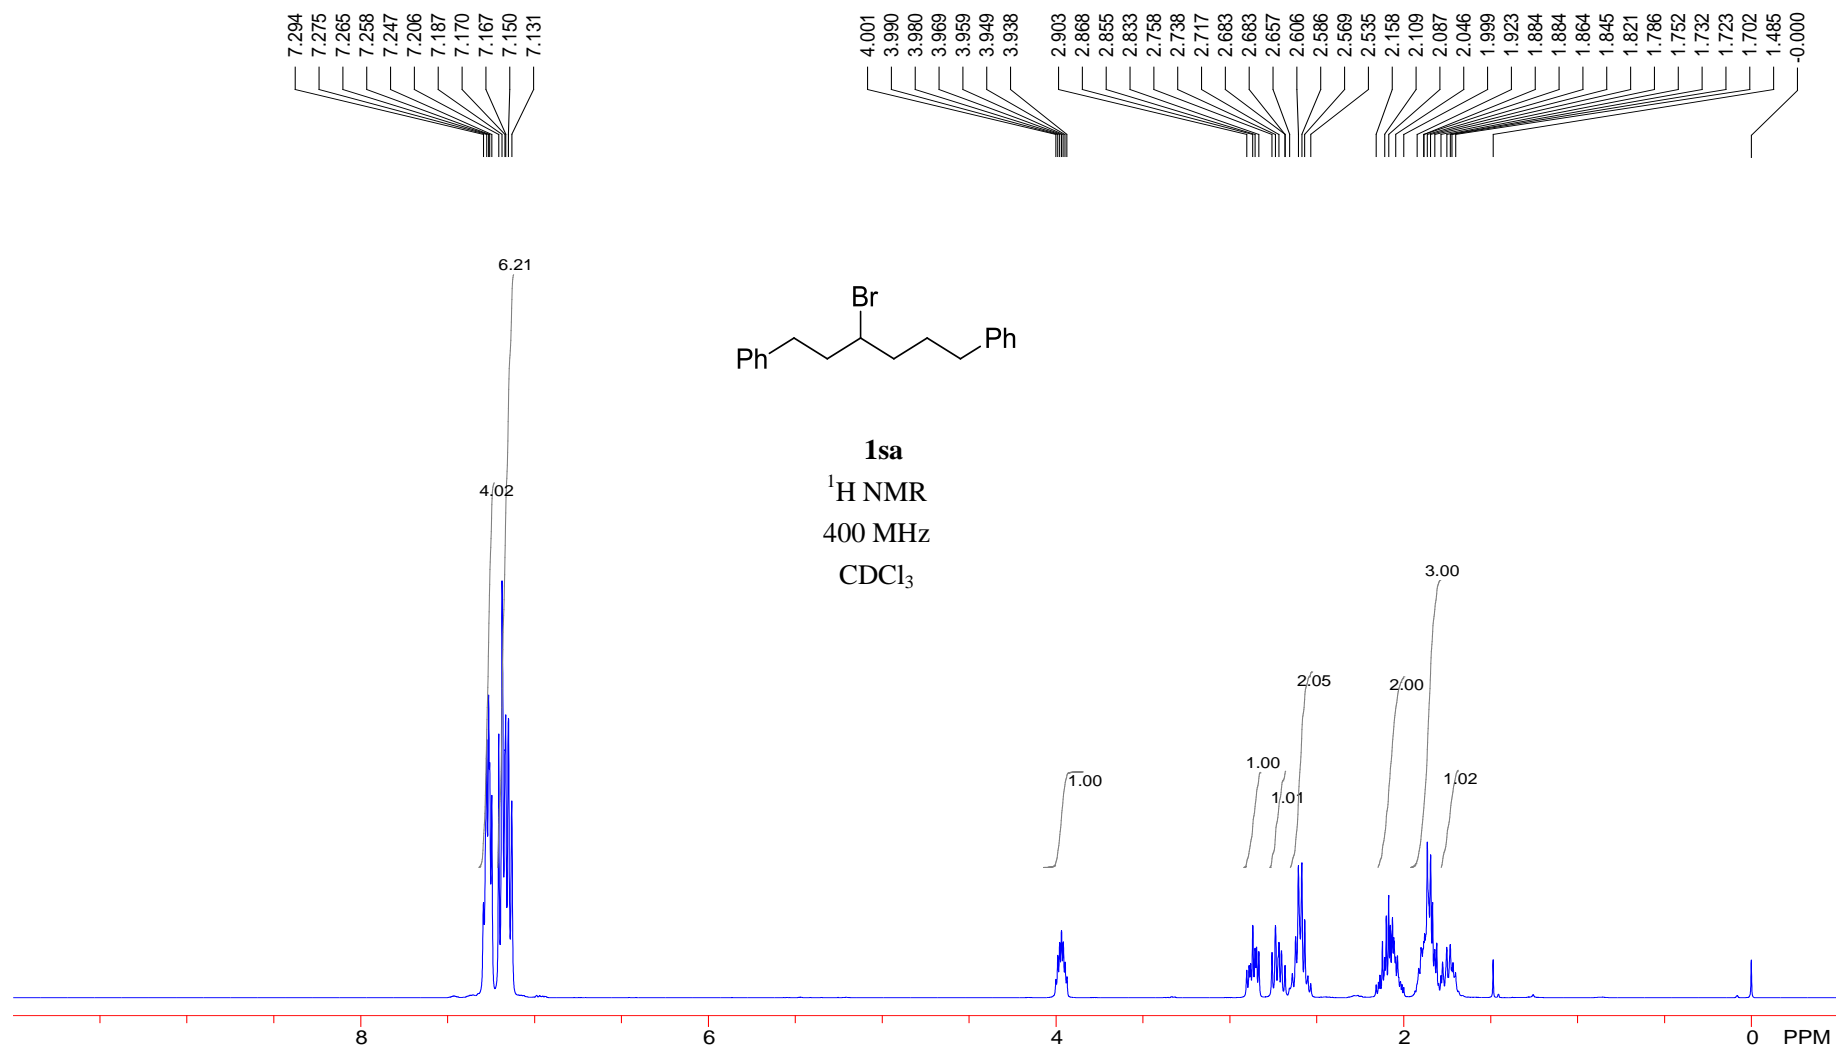

**Supplementary Figure 112.** <sup>1</sup>H NMR spectrum for **1sa**

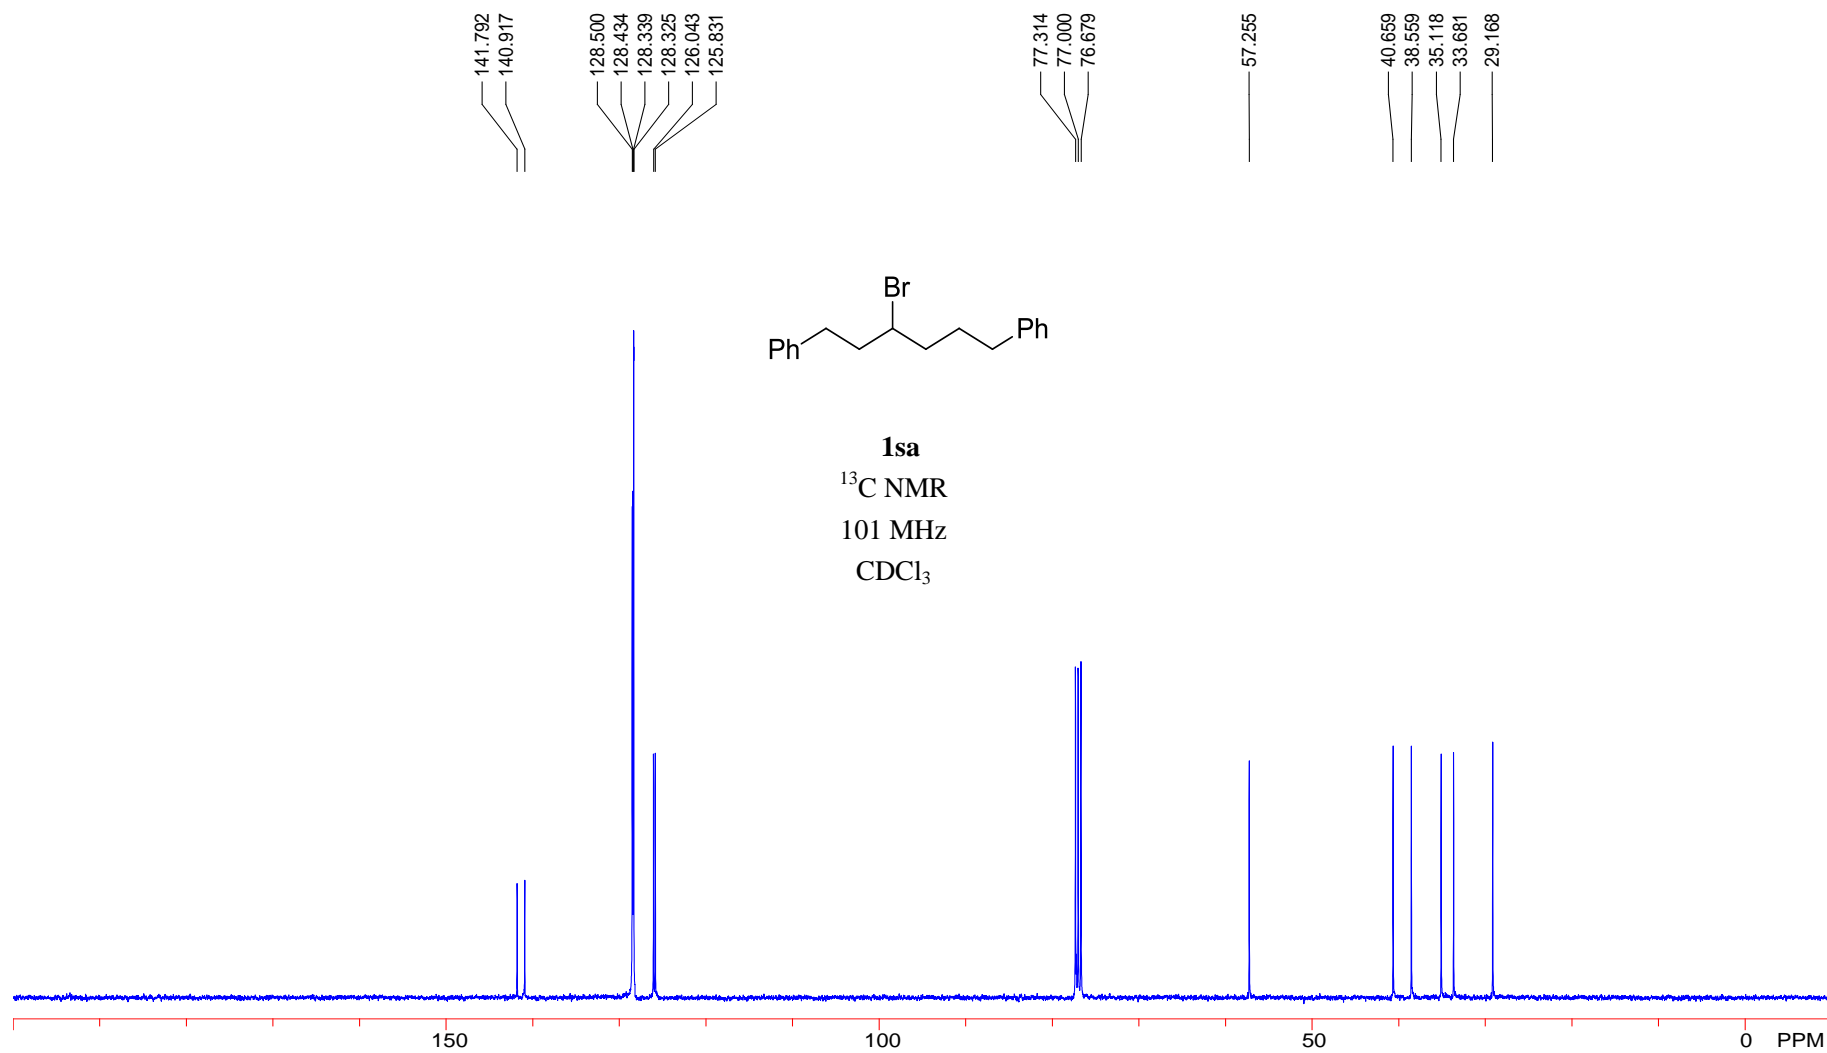

Supplementary Figure 113.  $^{13}\text{C}$  NMR spectrum for **1sa**

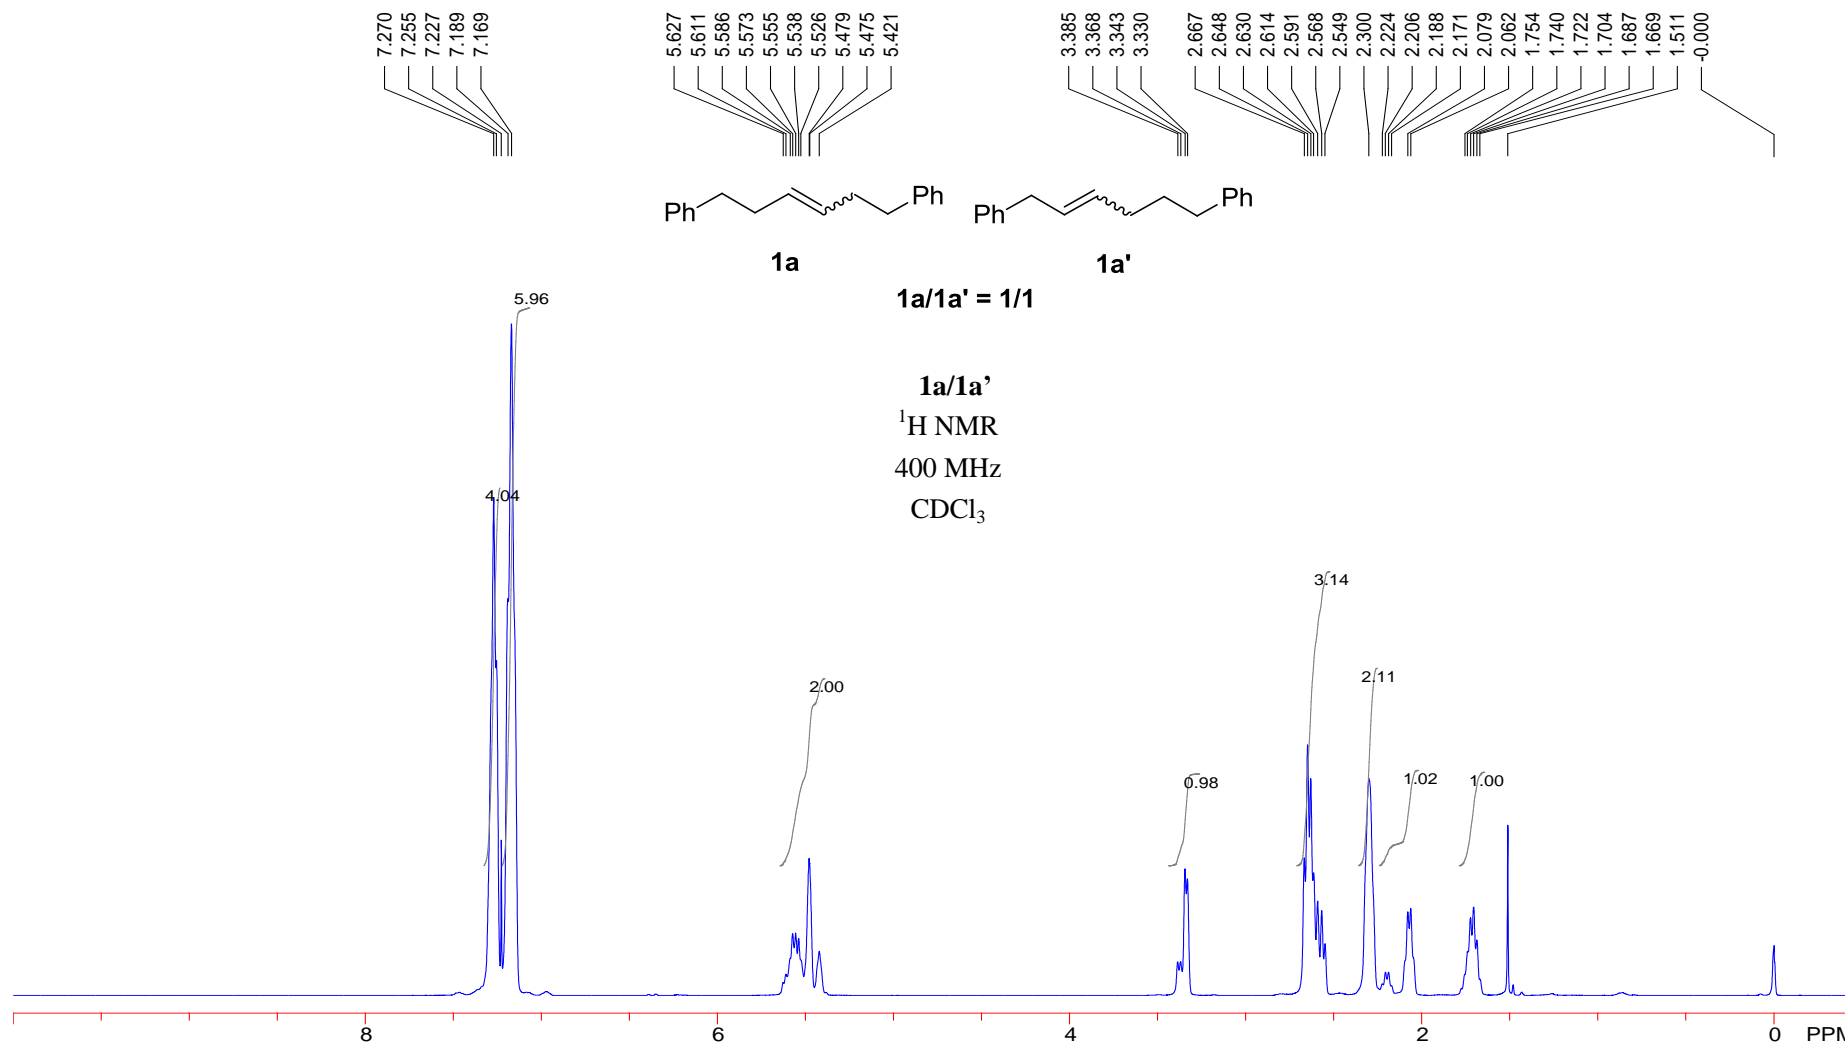

Supplementary Figure 114.  $^1H$  NMR spectrum for  $1a/1a'$

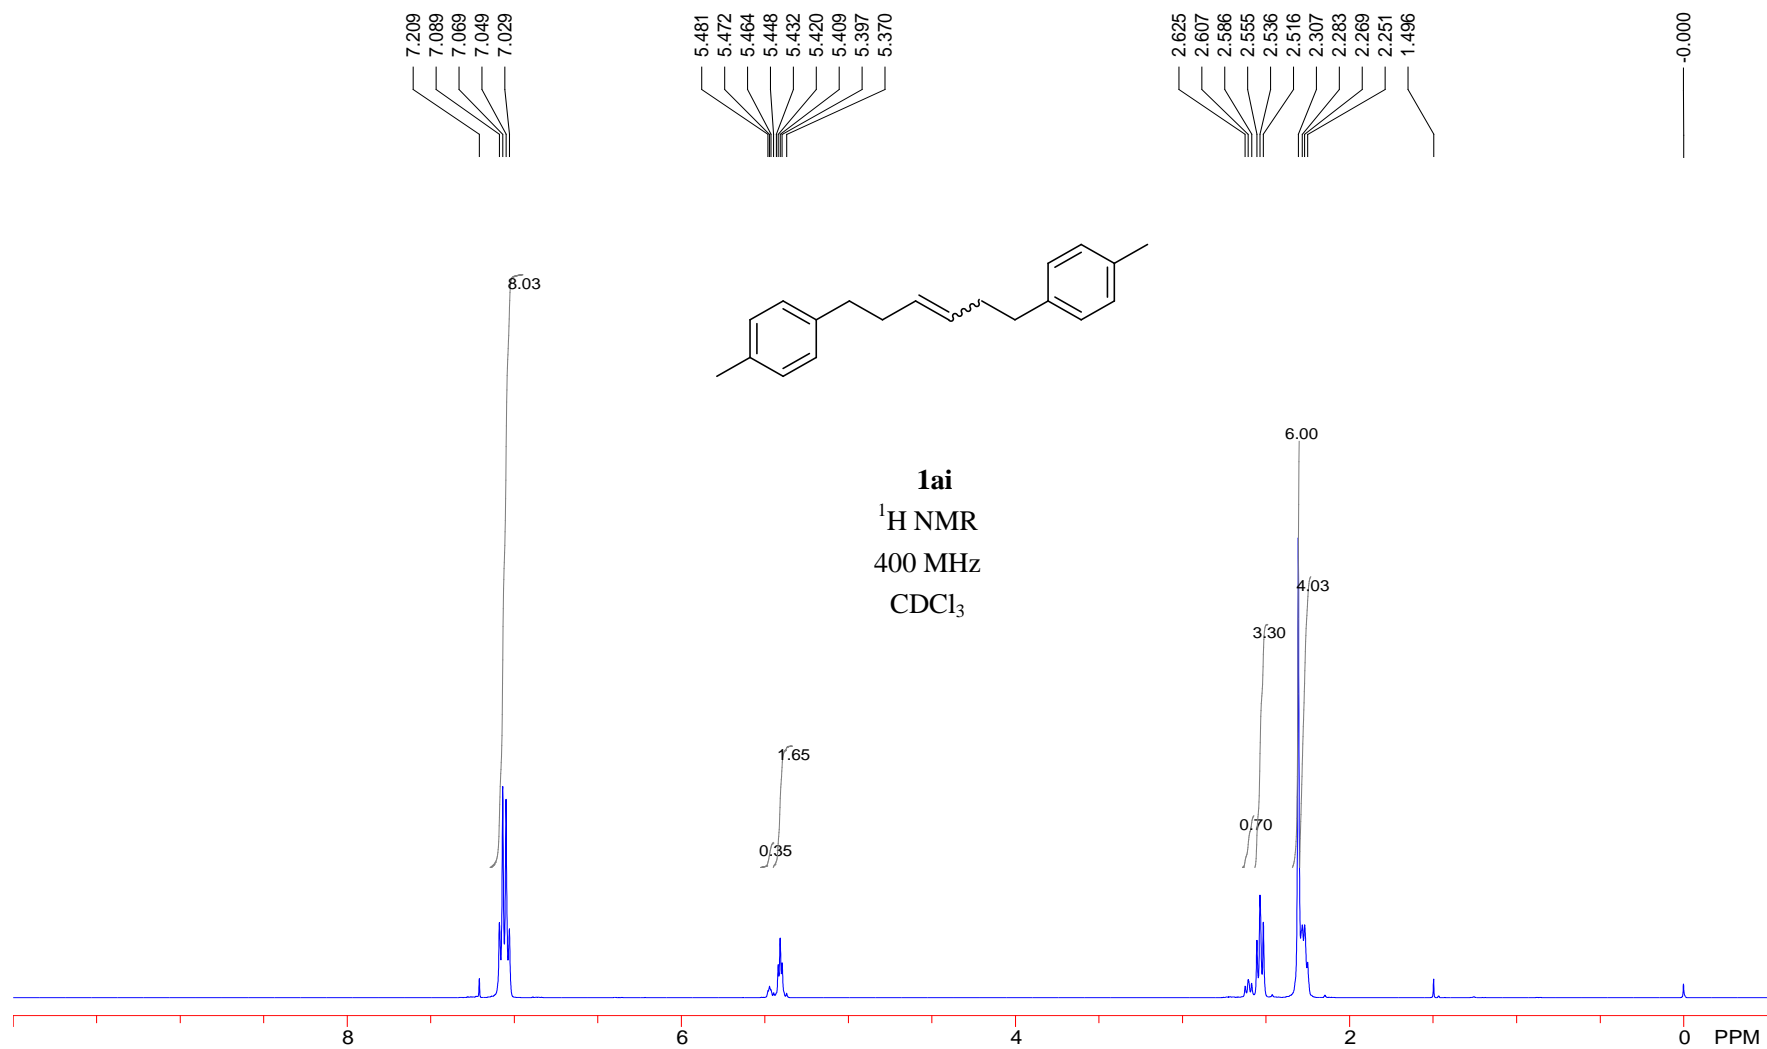

**Supplementary Figure 115.** <sup>1</sup>H NMR spectrum for **1ai**

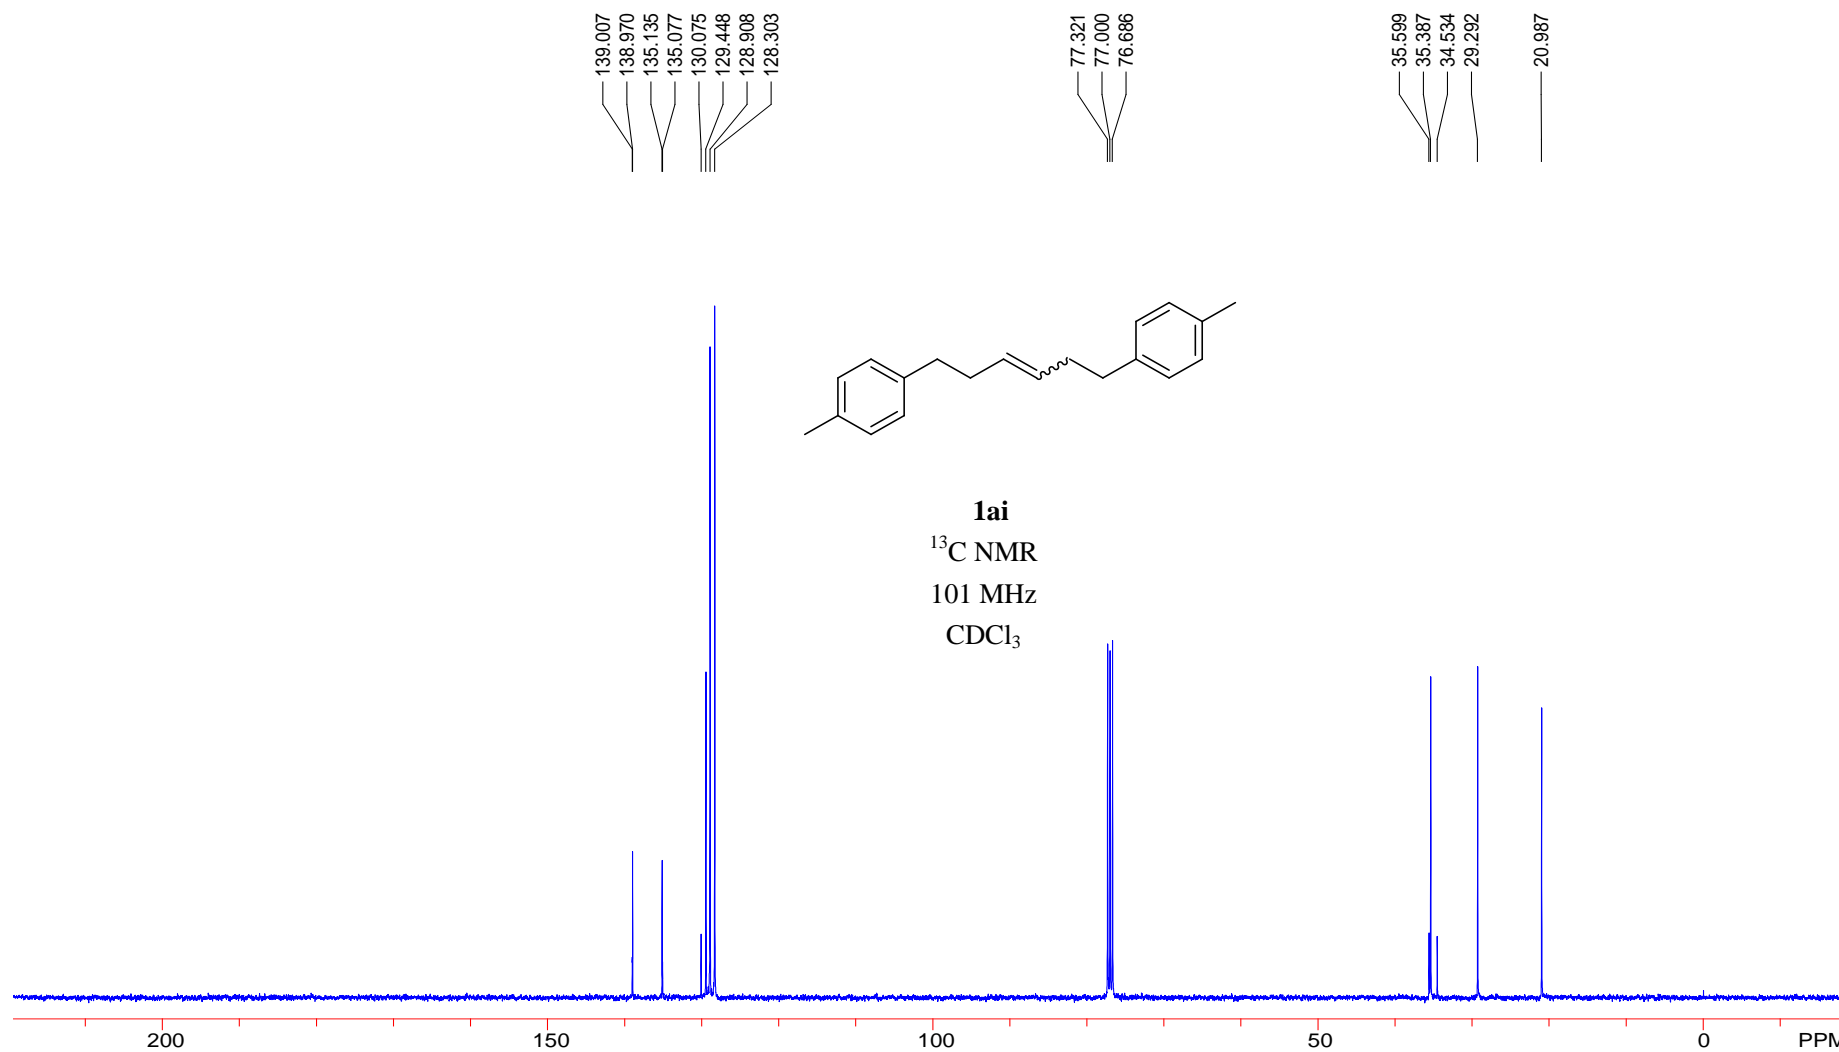

**Supplementary Figure 116.**  $^{13}\text{C}$  NMR spectrum for **1ai**

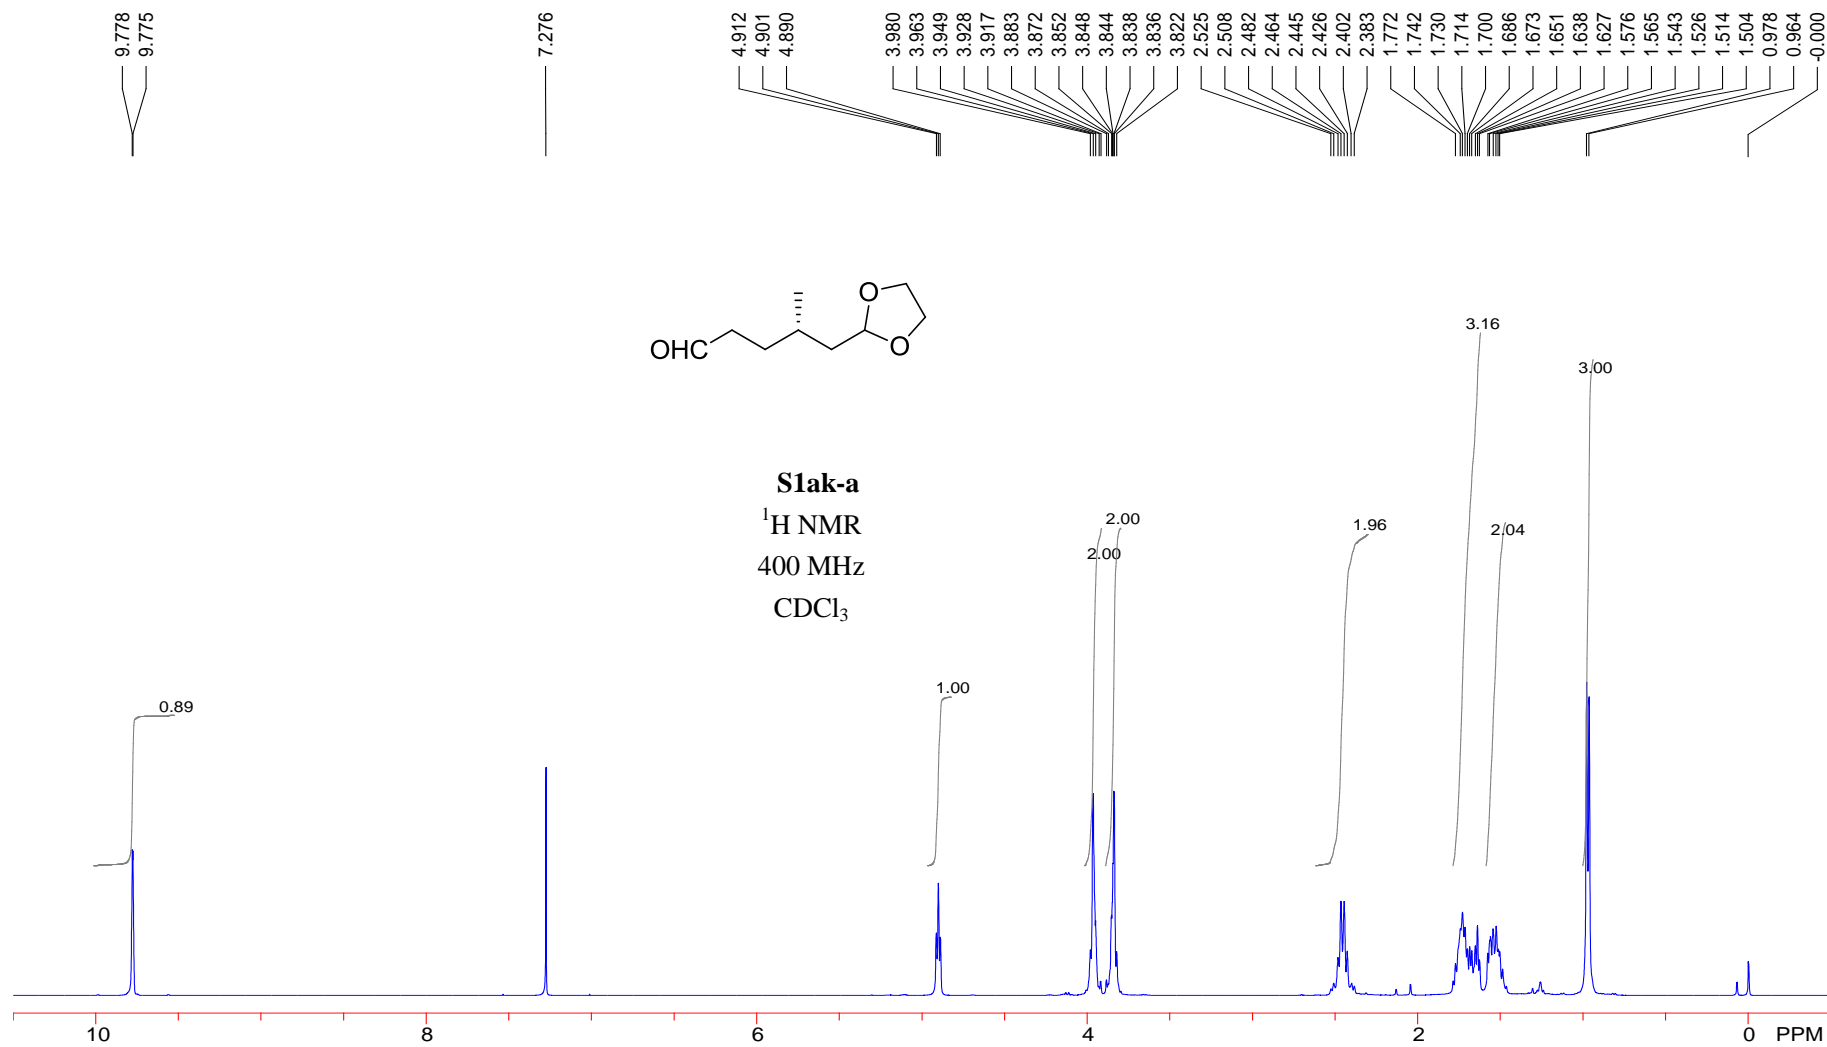

Supplementary Figure 117.  $^1\text{H}$  NMR spectrum for s1ak-a

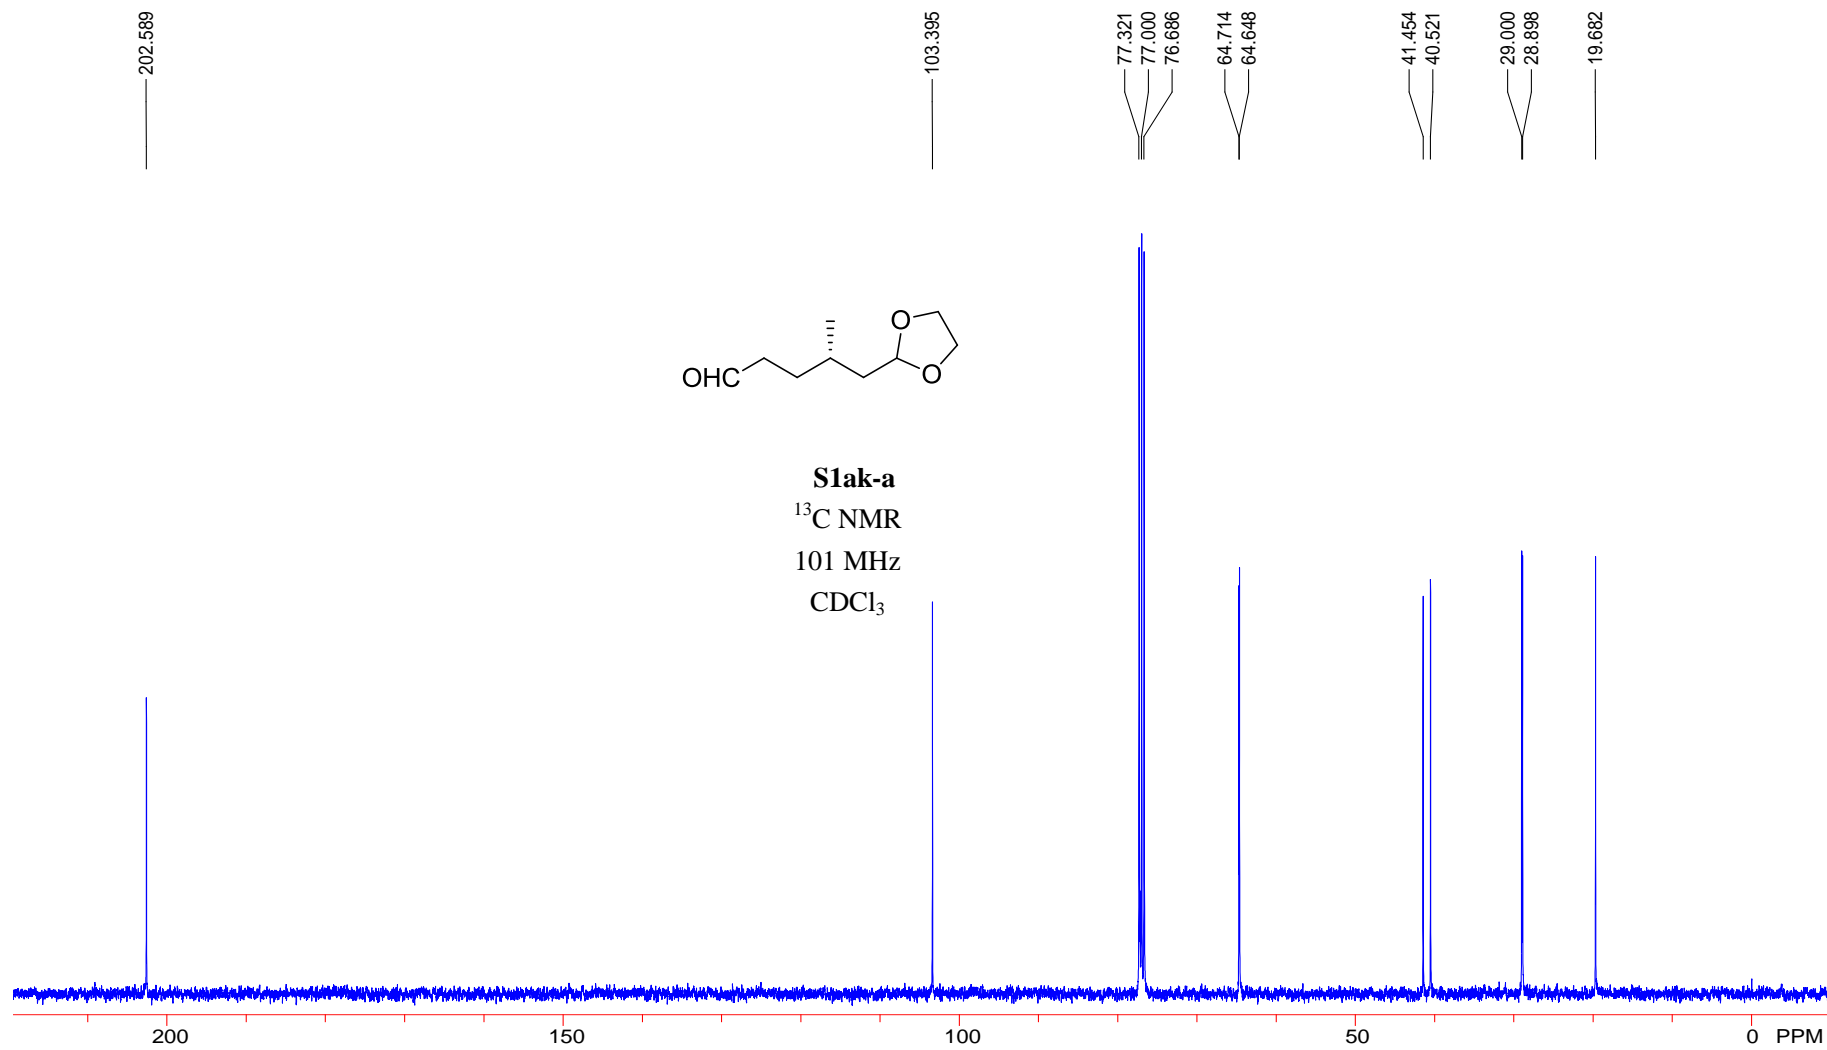

**Supplementary Figure 118.** <sup>13</sup>C NMR spectrum for **s1ak-a**

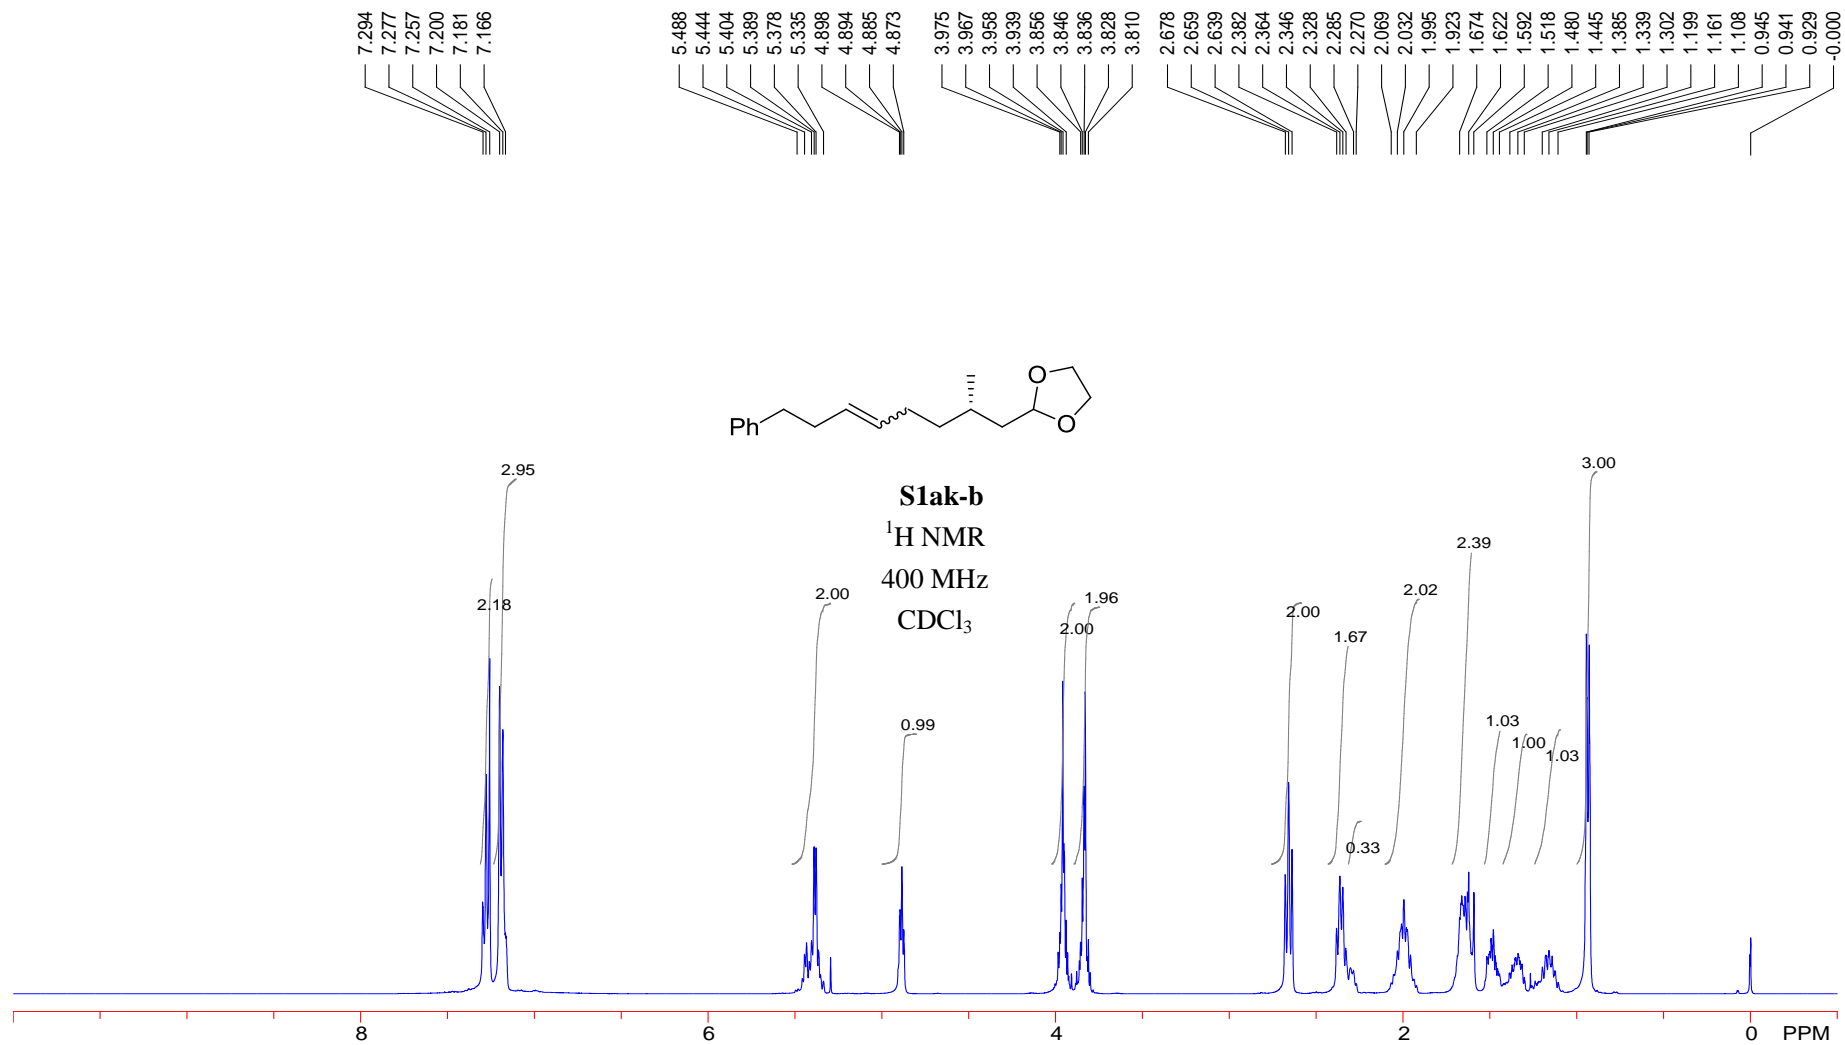

Supplementary Figure 119. <sup>1</sup>H NMR spectrum for s1ak-b



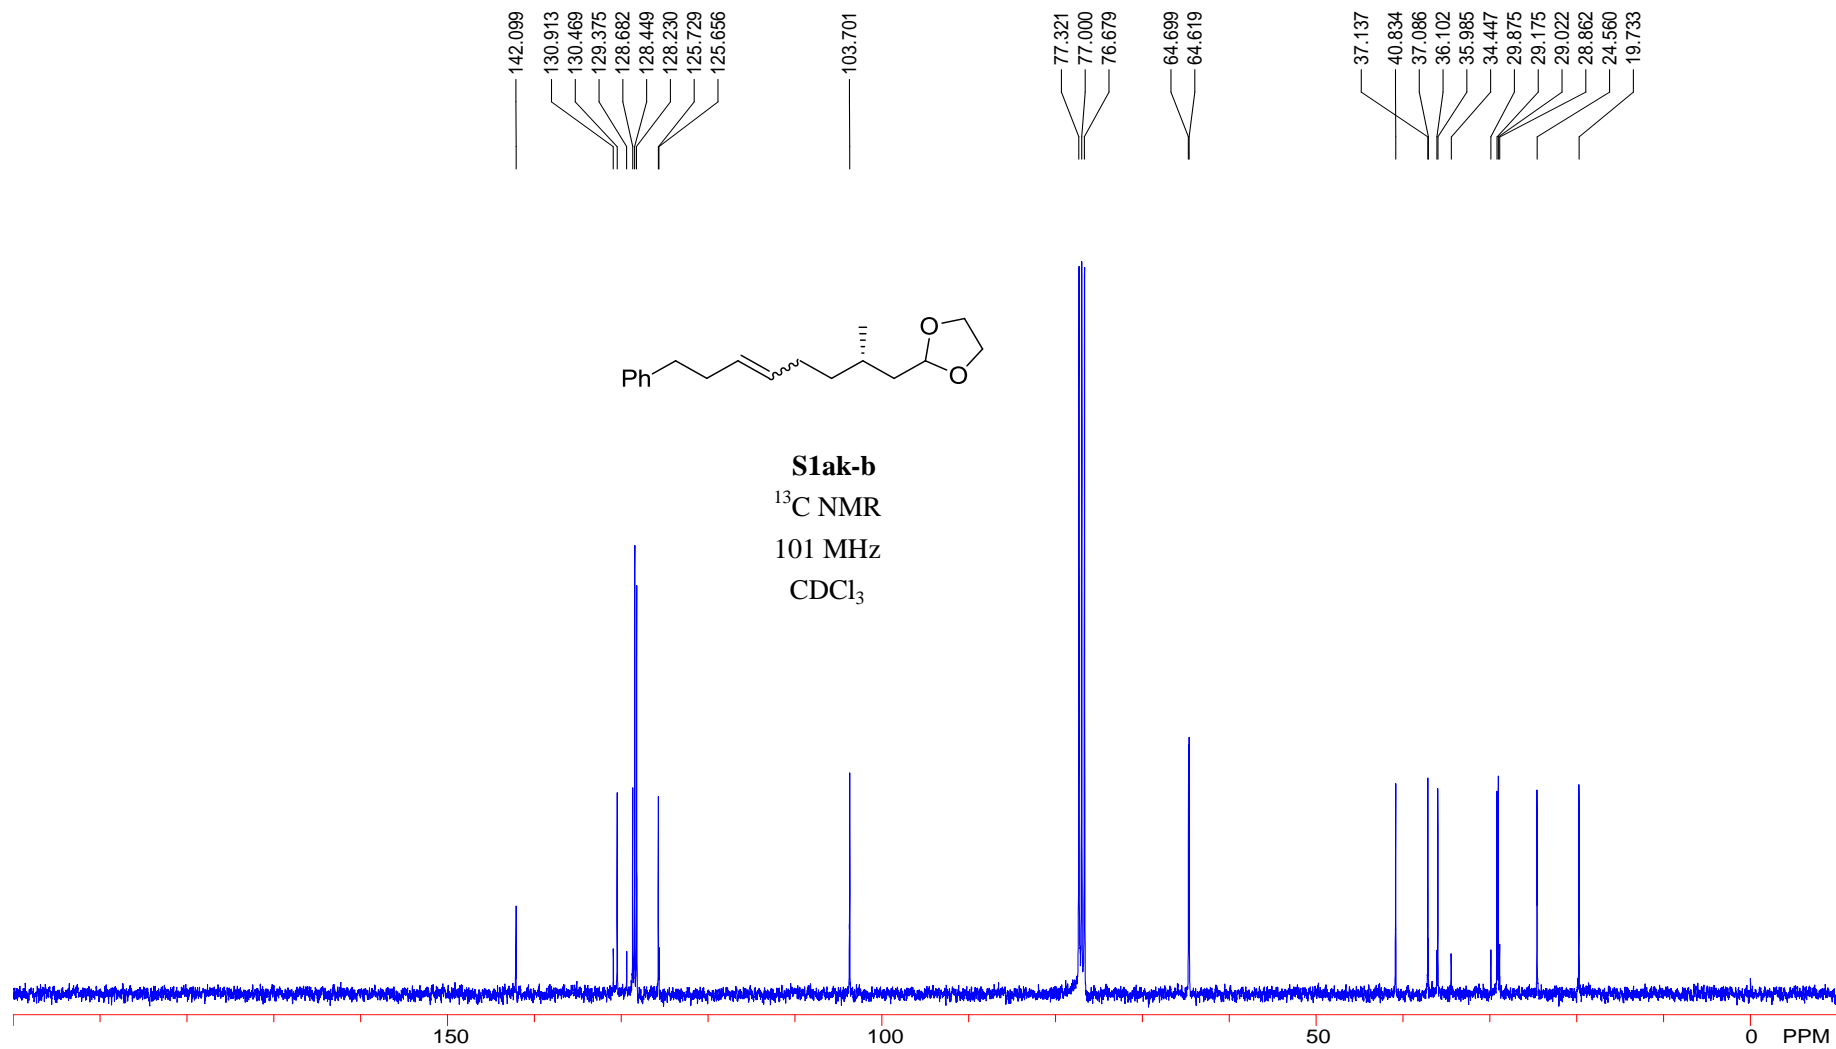

**Supplementary Figure 120.** <sup>13</sup>C NMR spectrum for **s1ak-b**

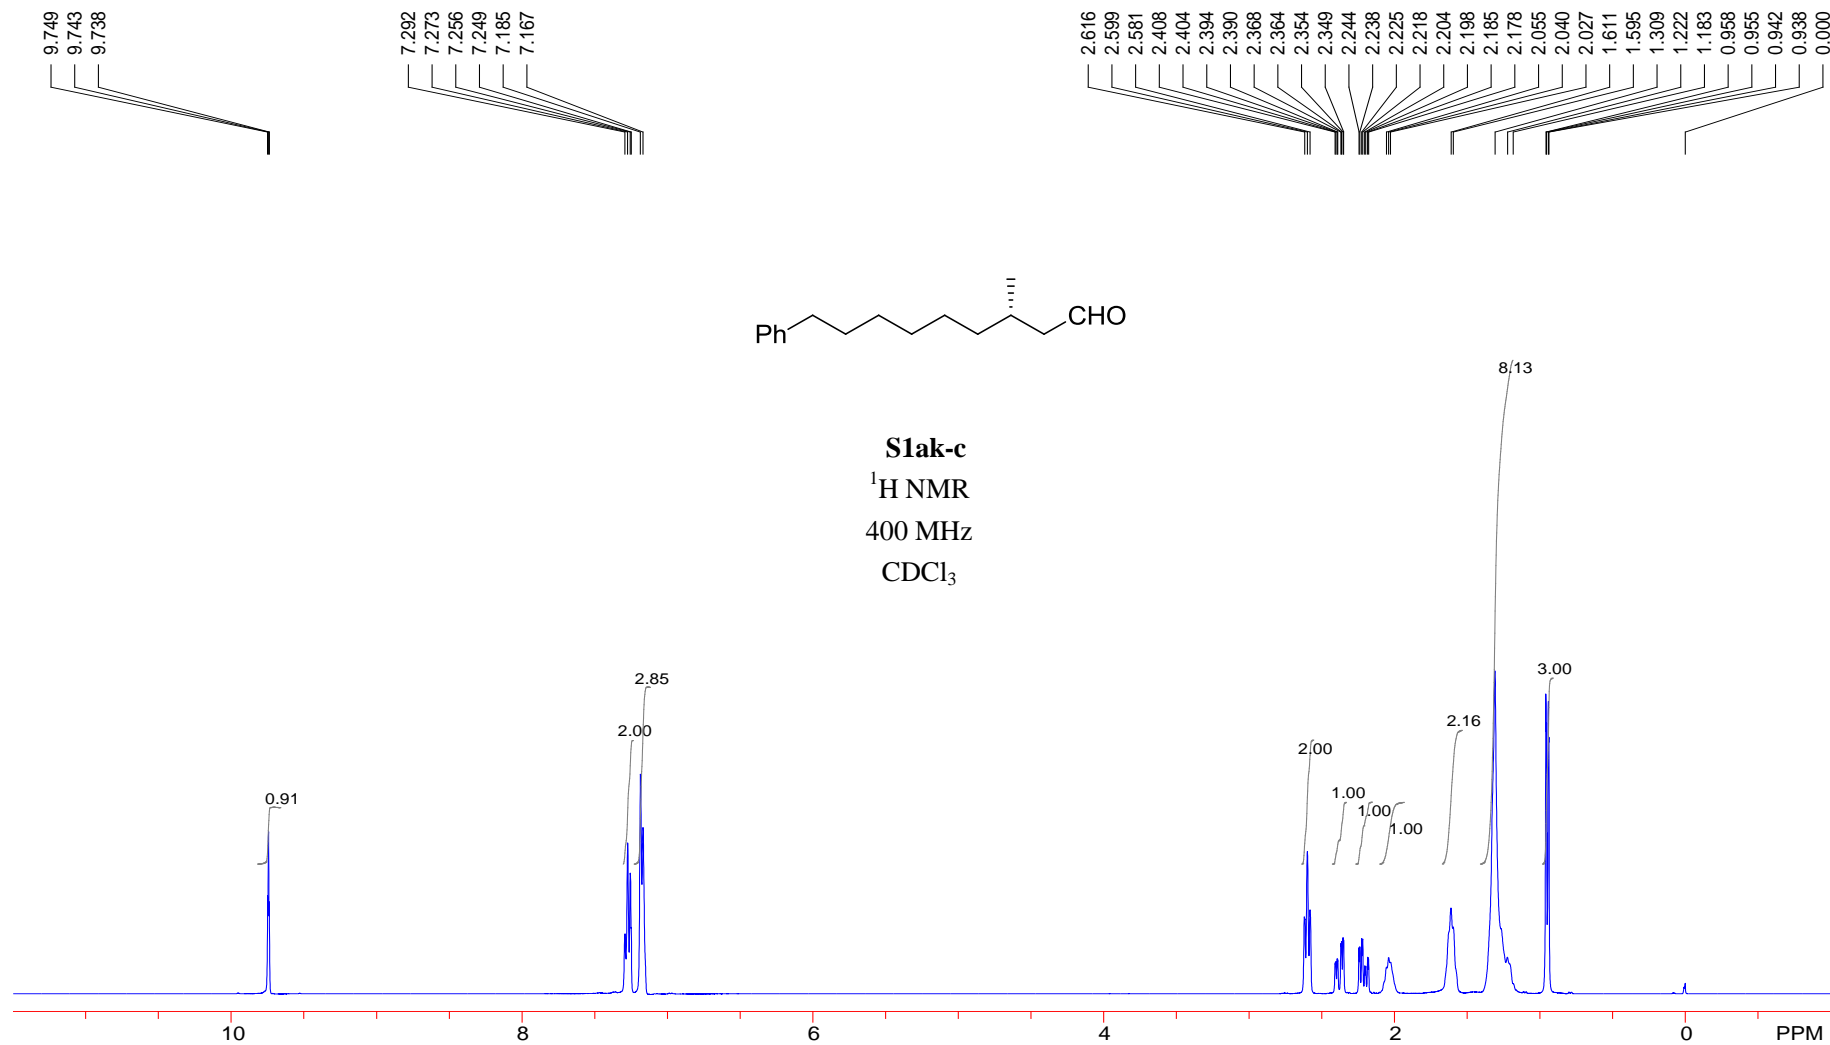

Supplementary Figure 121. <sup>1</sup>H NMR spectrum for **s1ak-c**

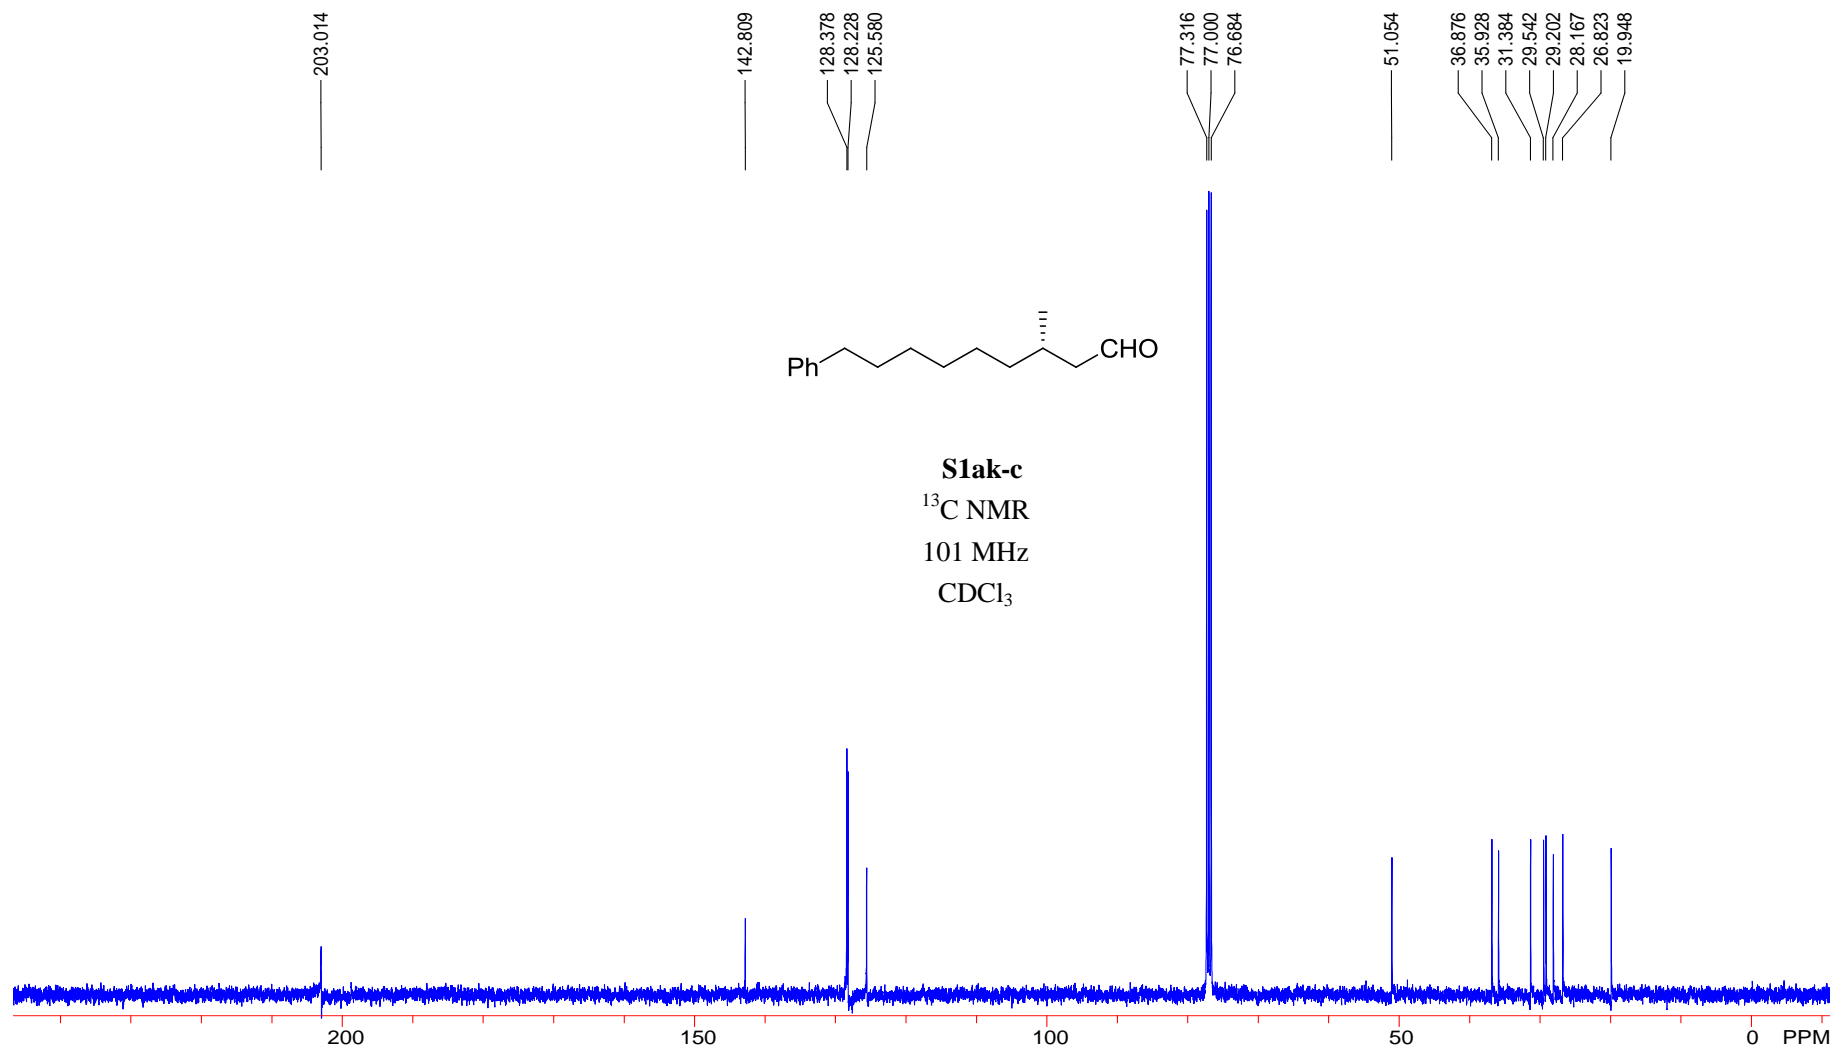

**Supplementary Figure 122.** <sup>13</sup>C NMR spectrum for **S1ak-c**

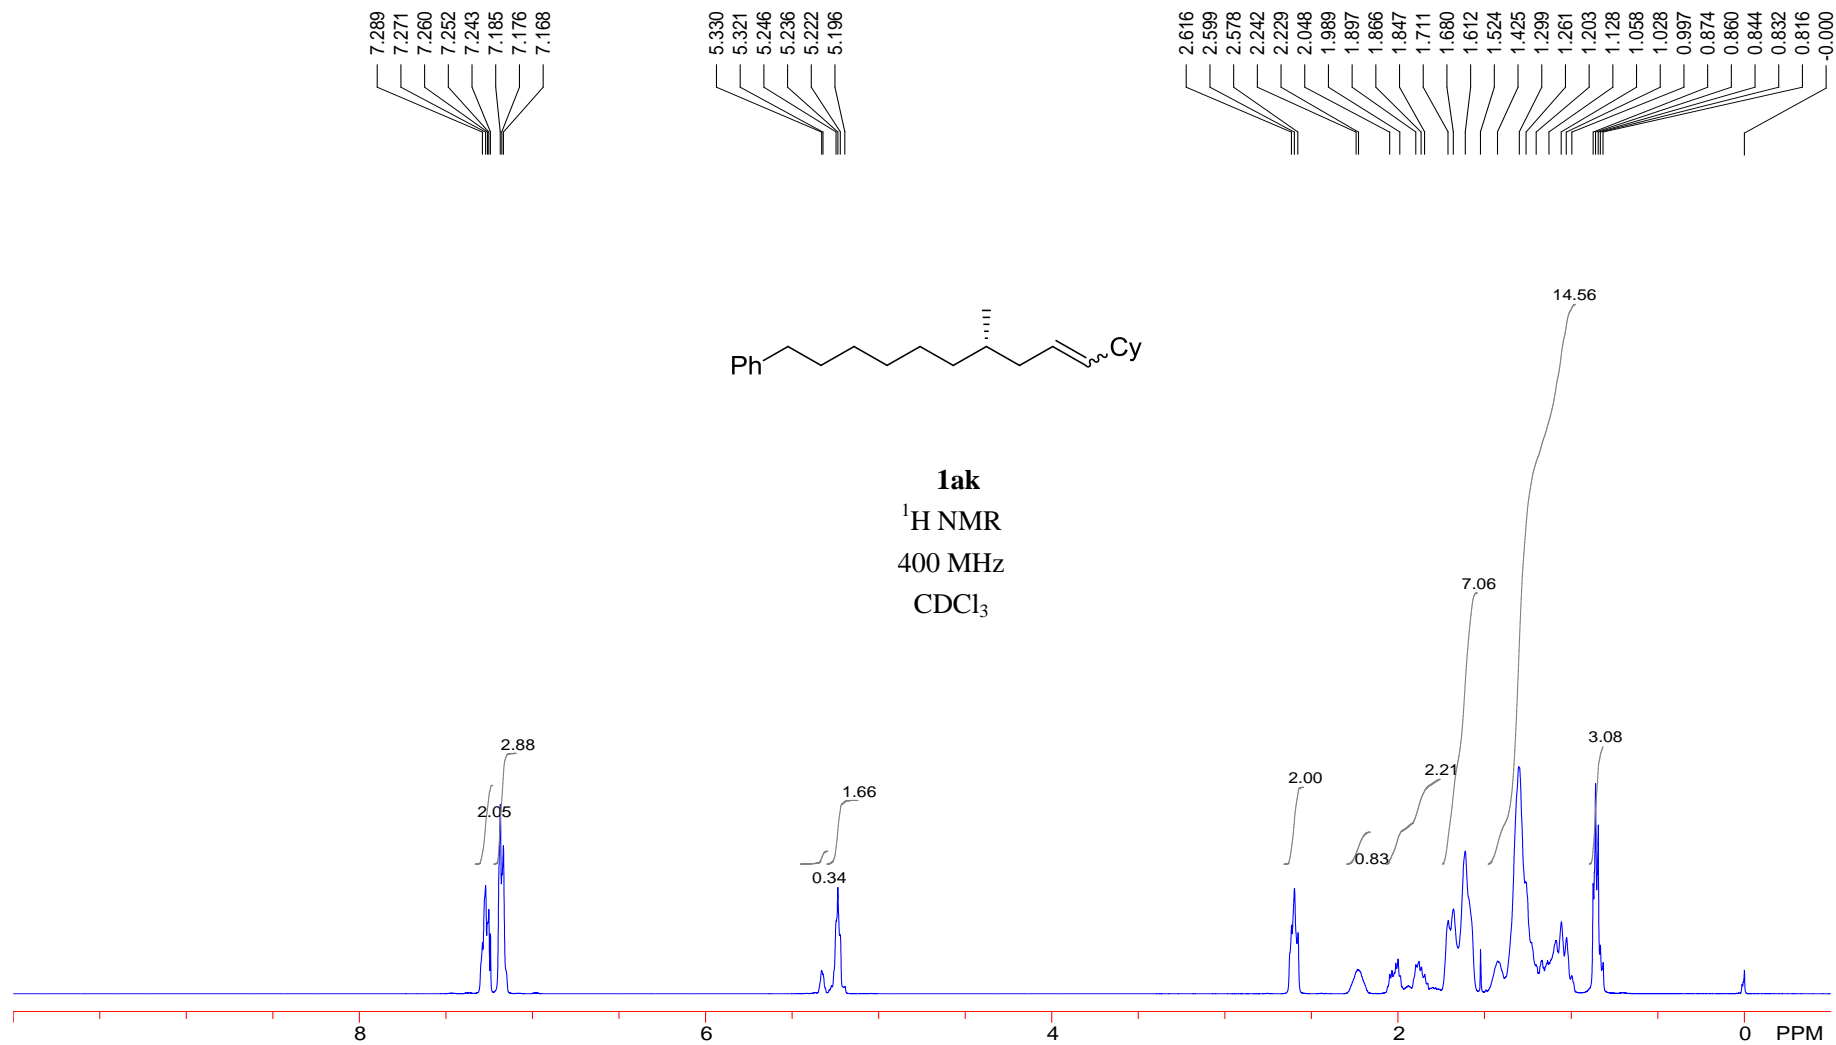

Supplementary Figure 123. <sup>1</sup>H NMR spectrum for **1ak**

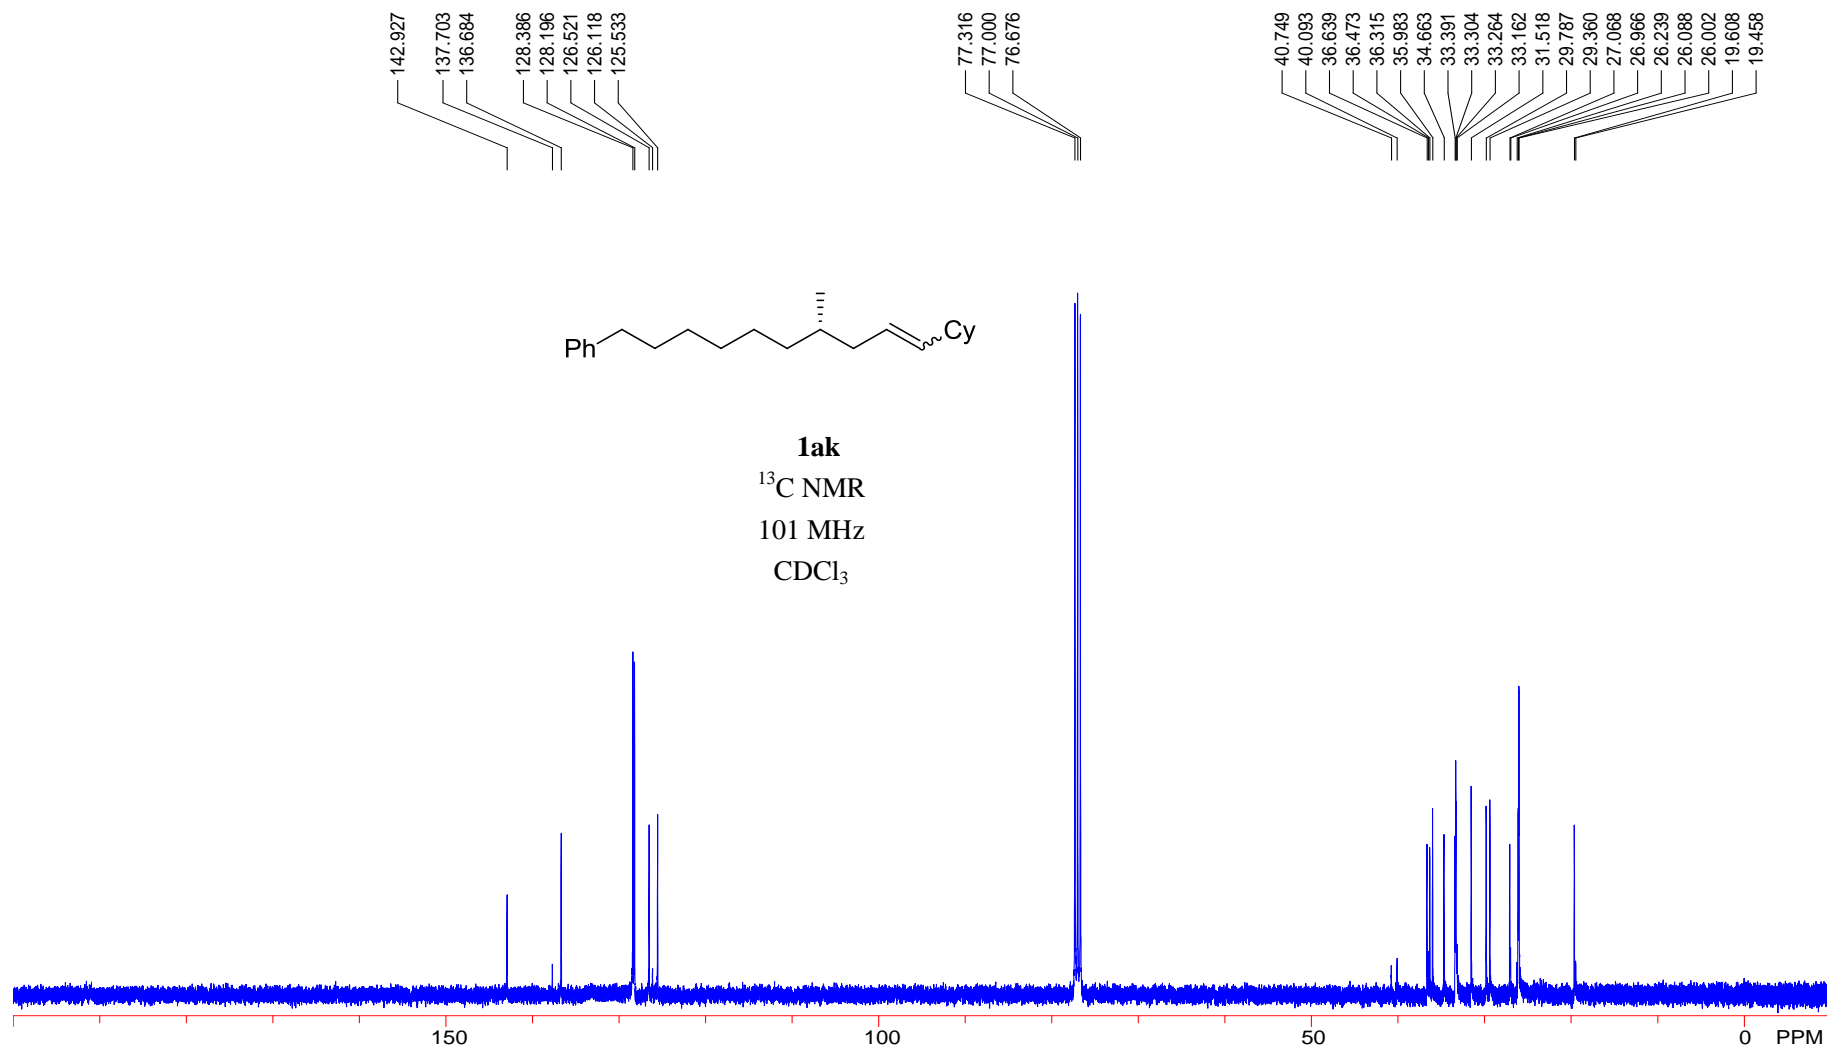

**Supplementary Figure 124.** <sup>13</sup>C NMR spectrum for **1ak**

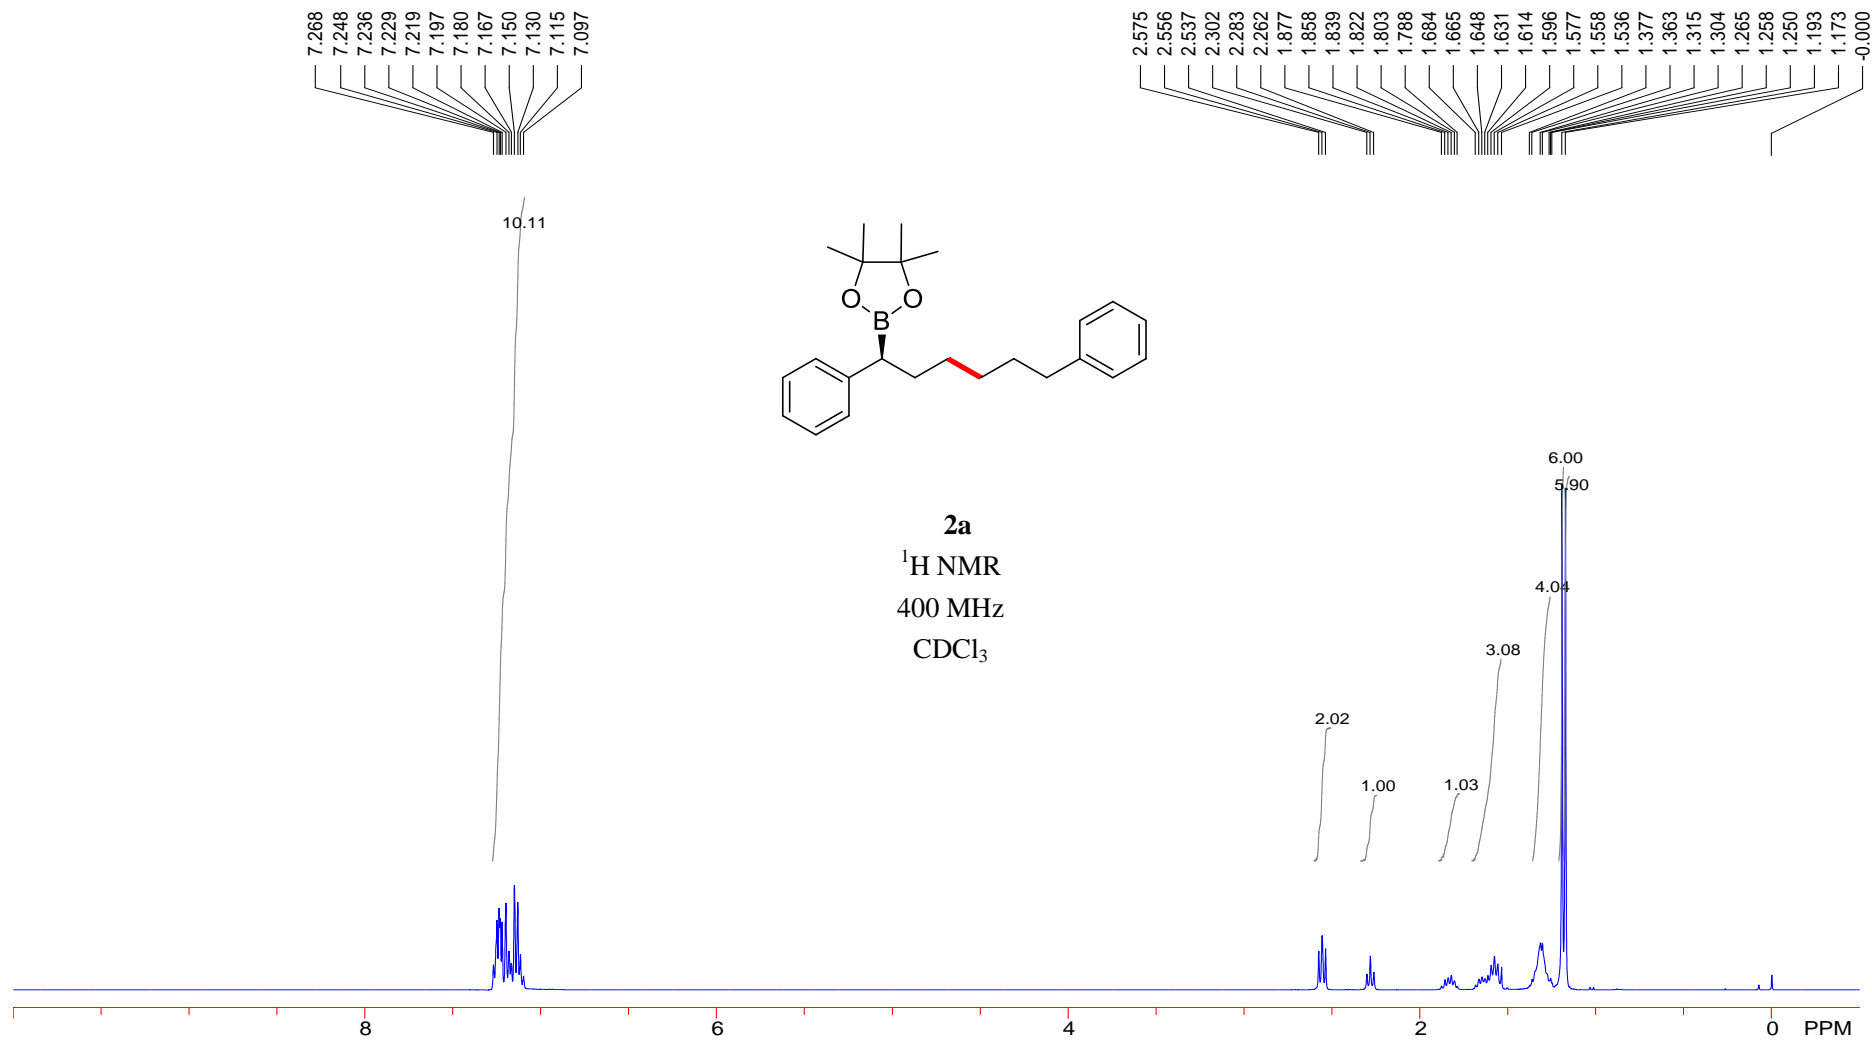

Supplementary Figure 125.  $^1\text{H NMR}$  spectrum for **2a**

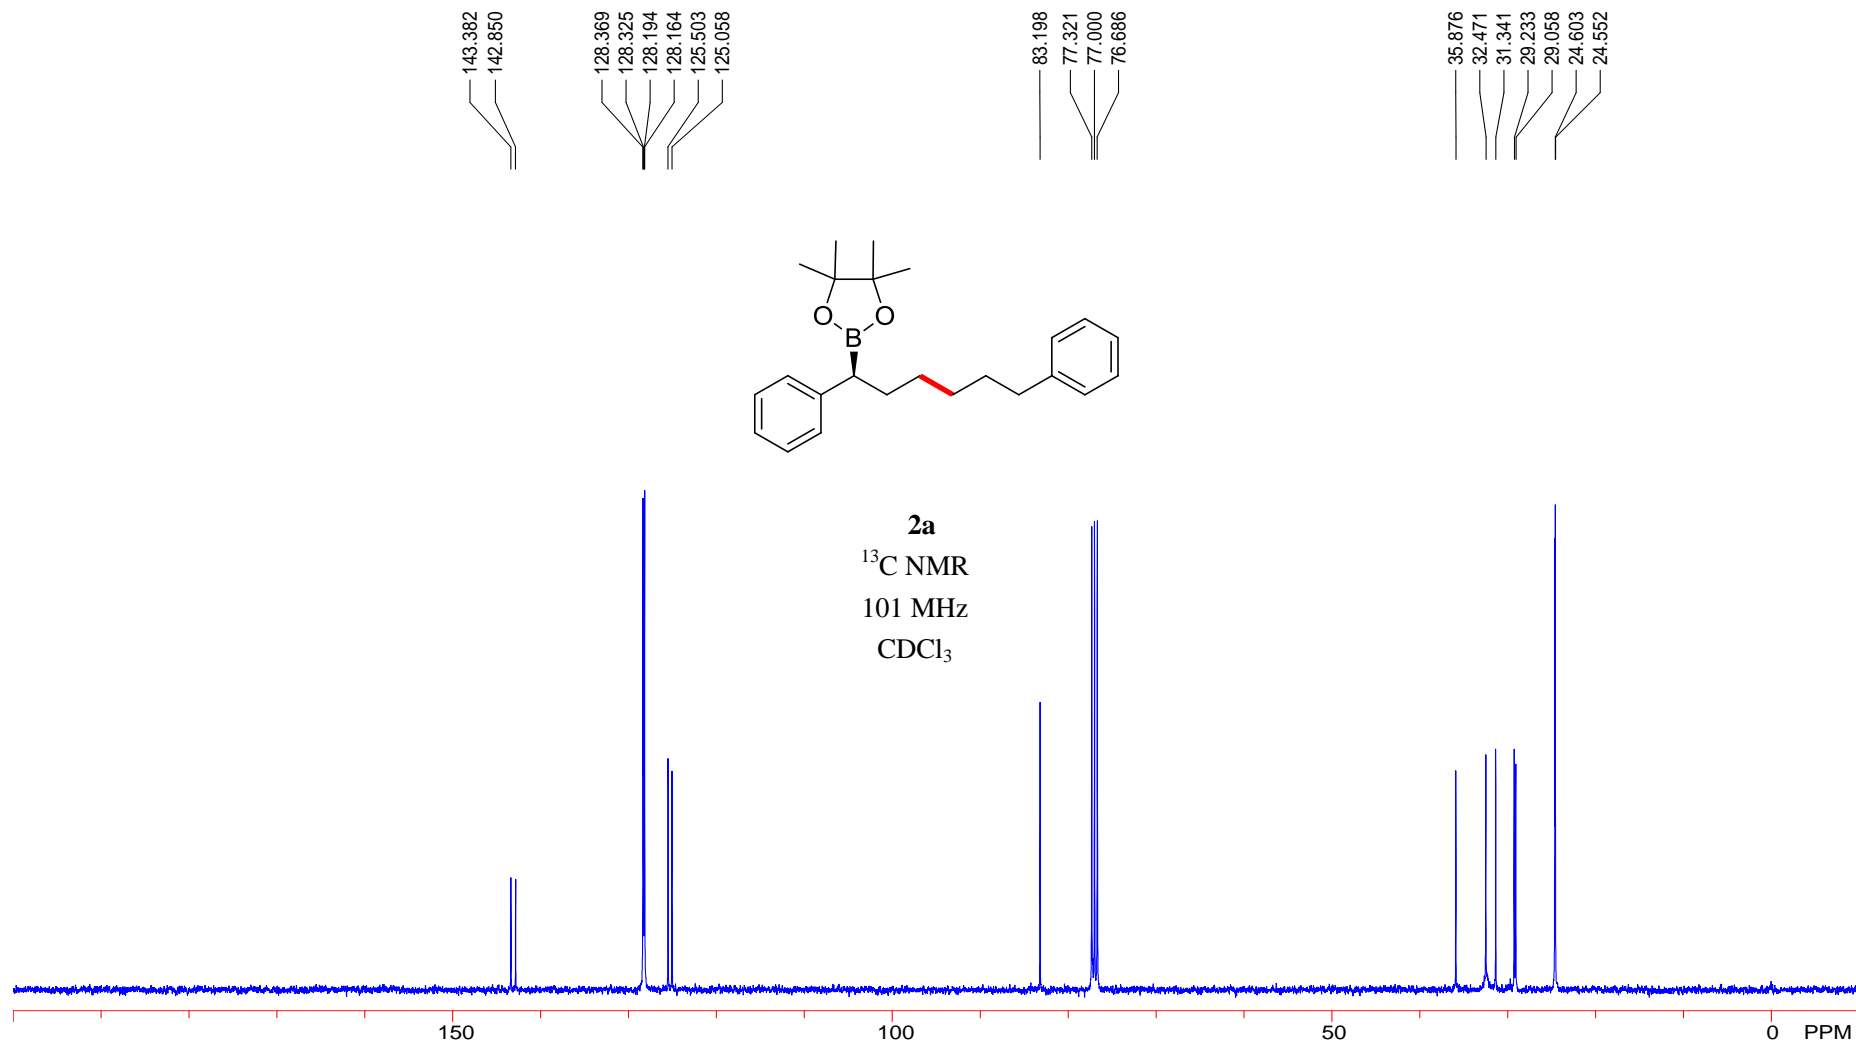

Supplementary Figure 126. <sup>13</sup>C NMR spectrum for **2a**

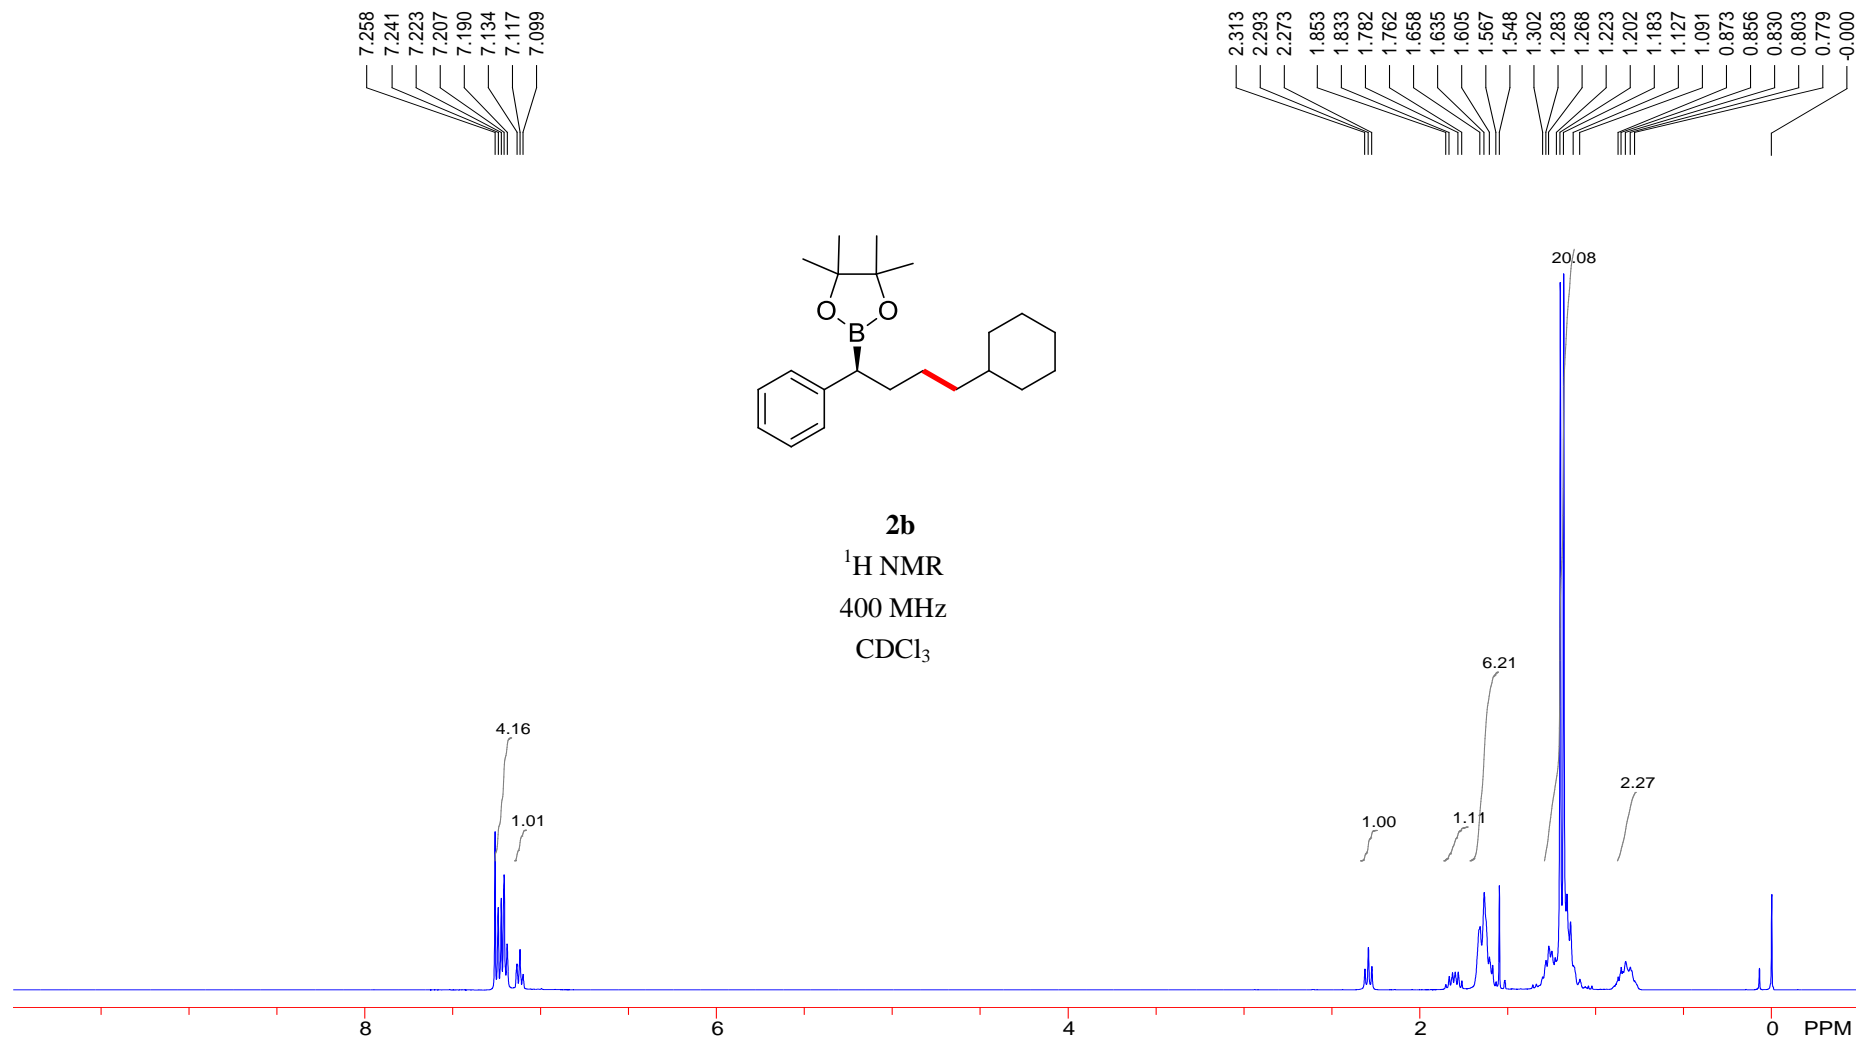

Supplementary Figure 127.  $^1\text{H NMR}$  spectrum for **2b**



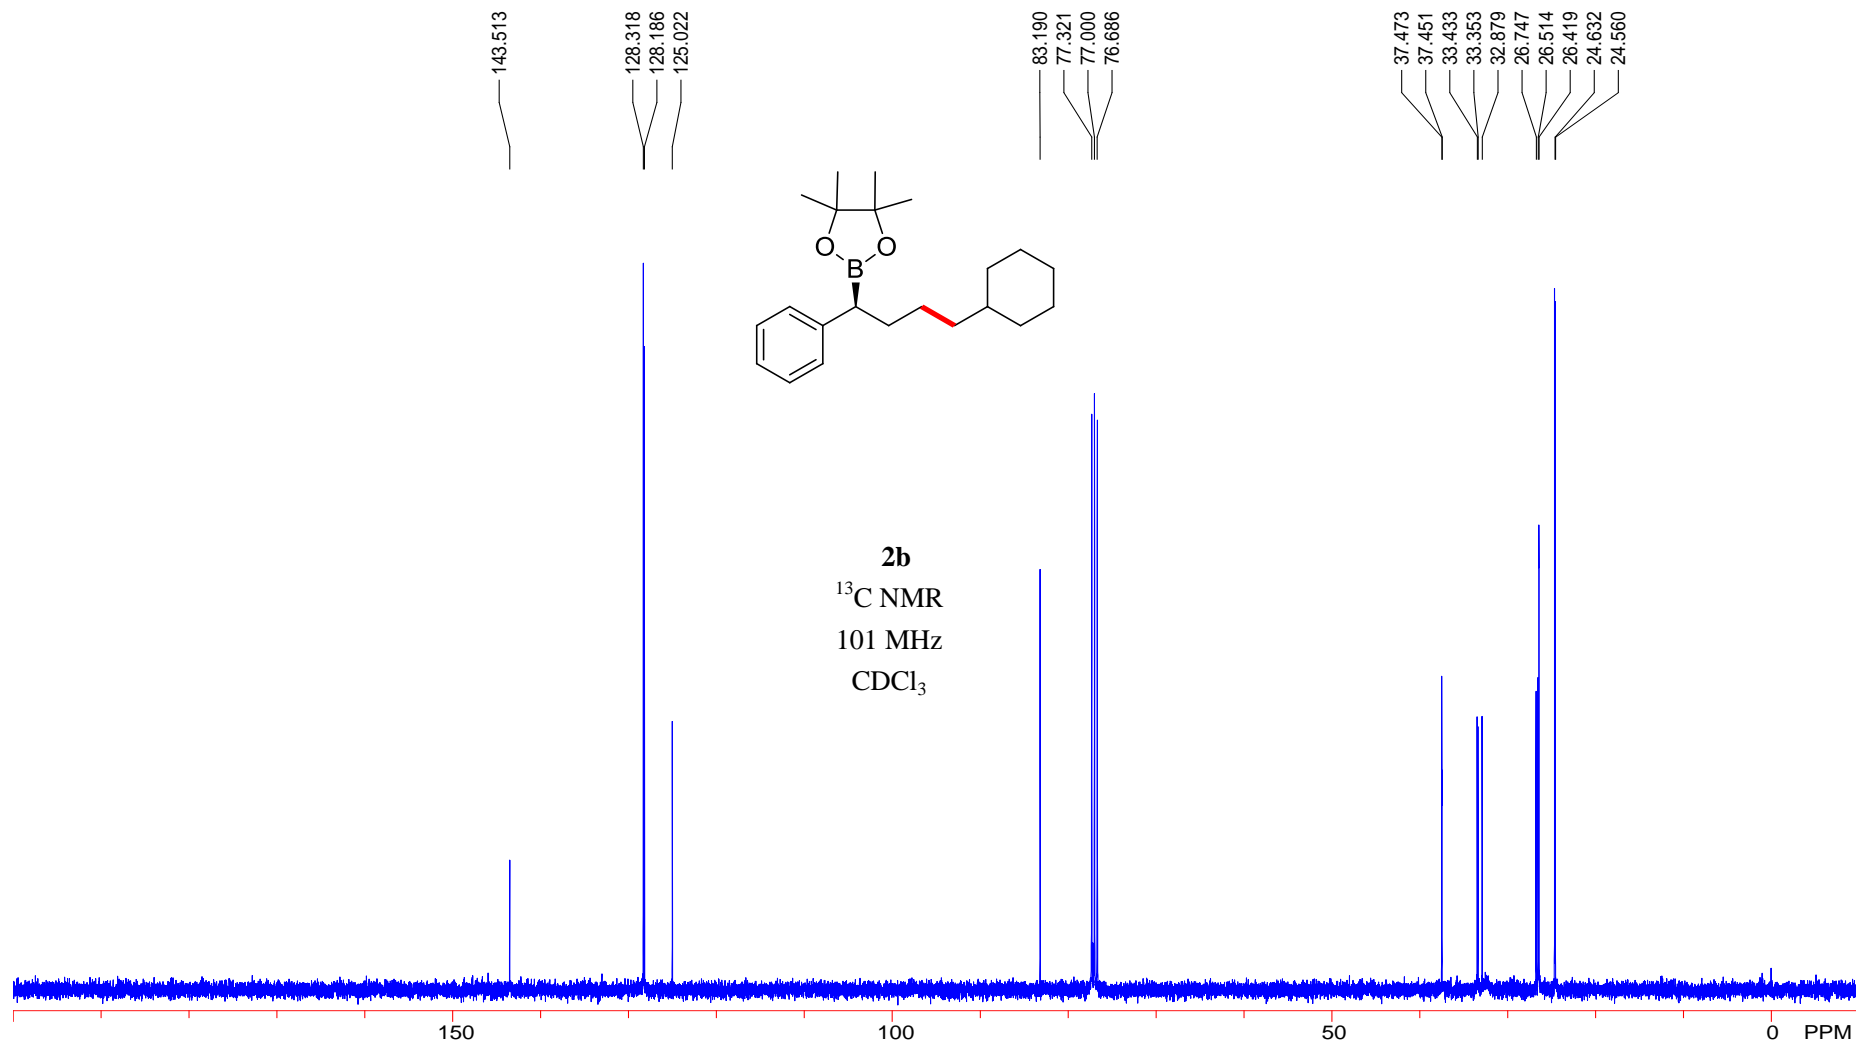

Supplementary Figure 128. <sup>13</sup>C NMR spectrum for 2b

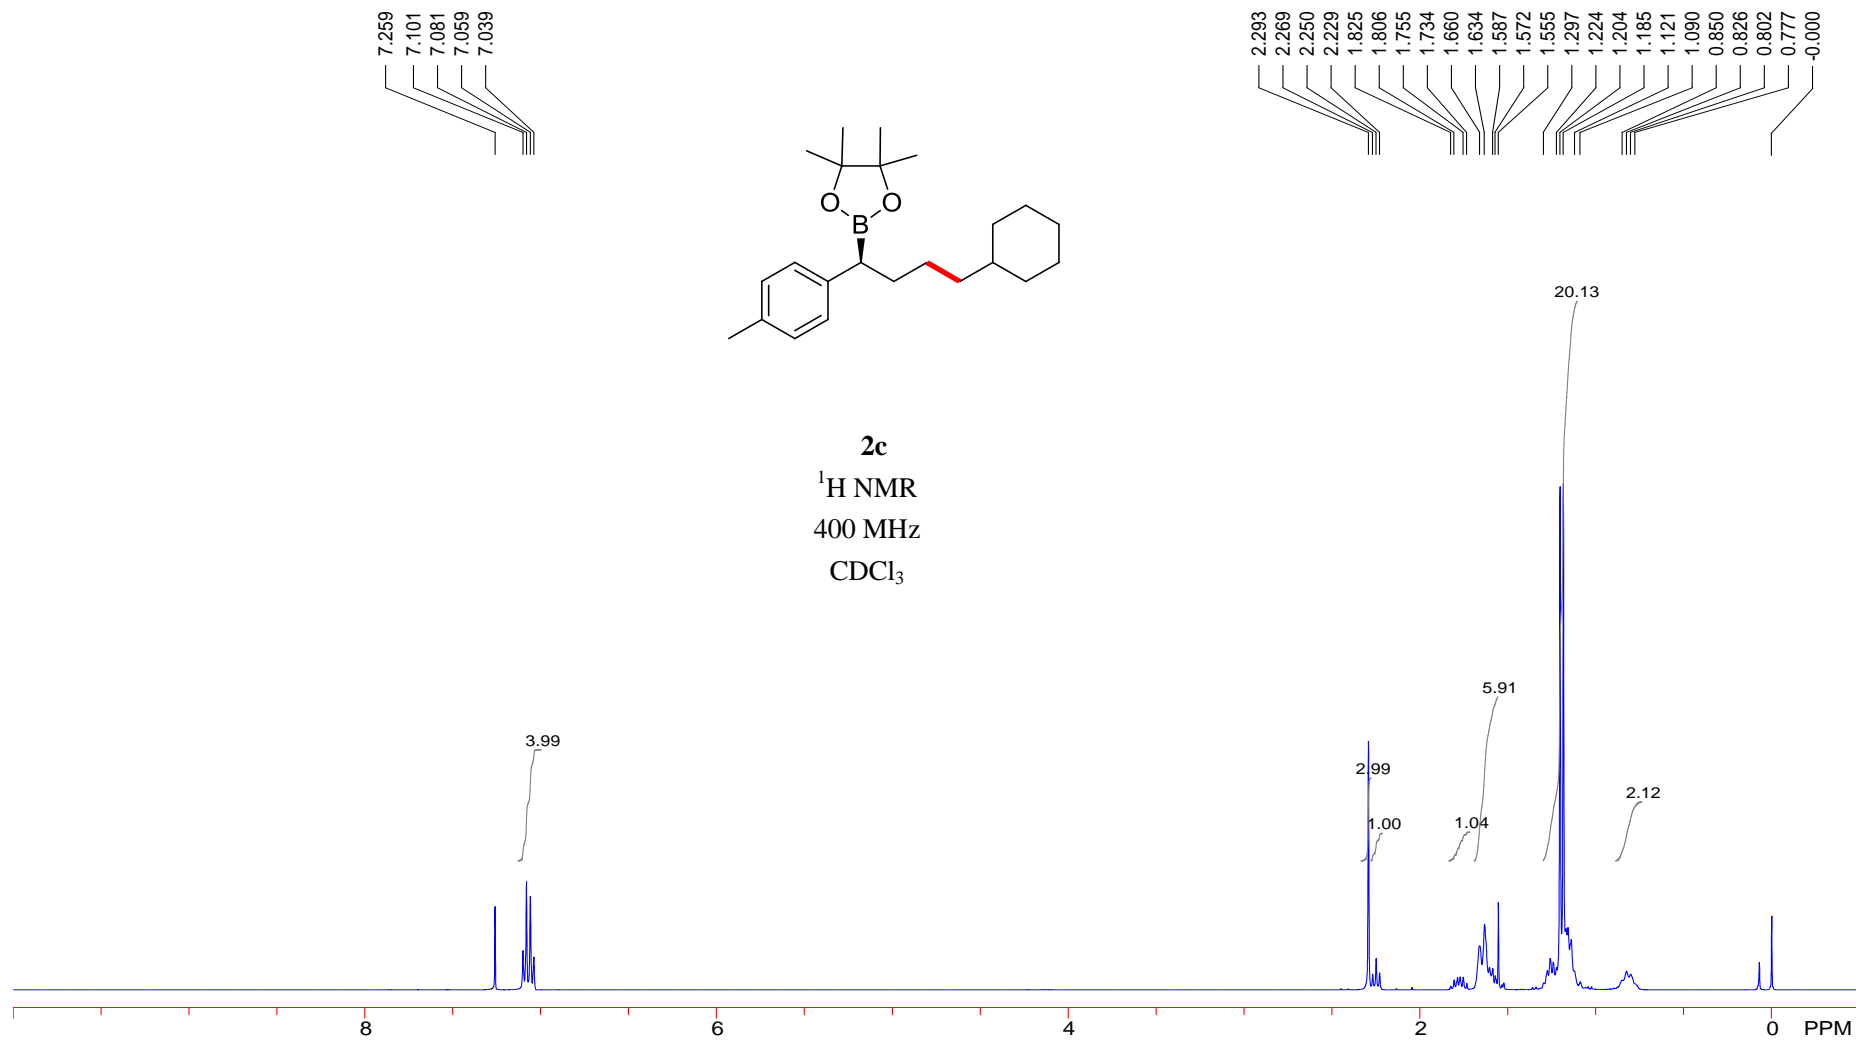

Supplementary Figure 129. <sup>1</sup>H NMR spectrum for **2c**

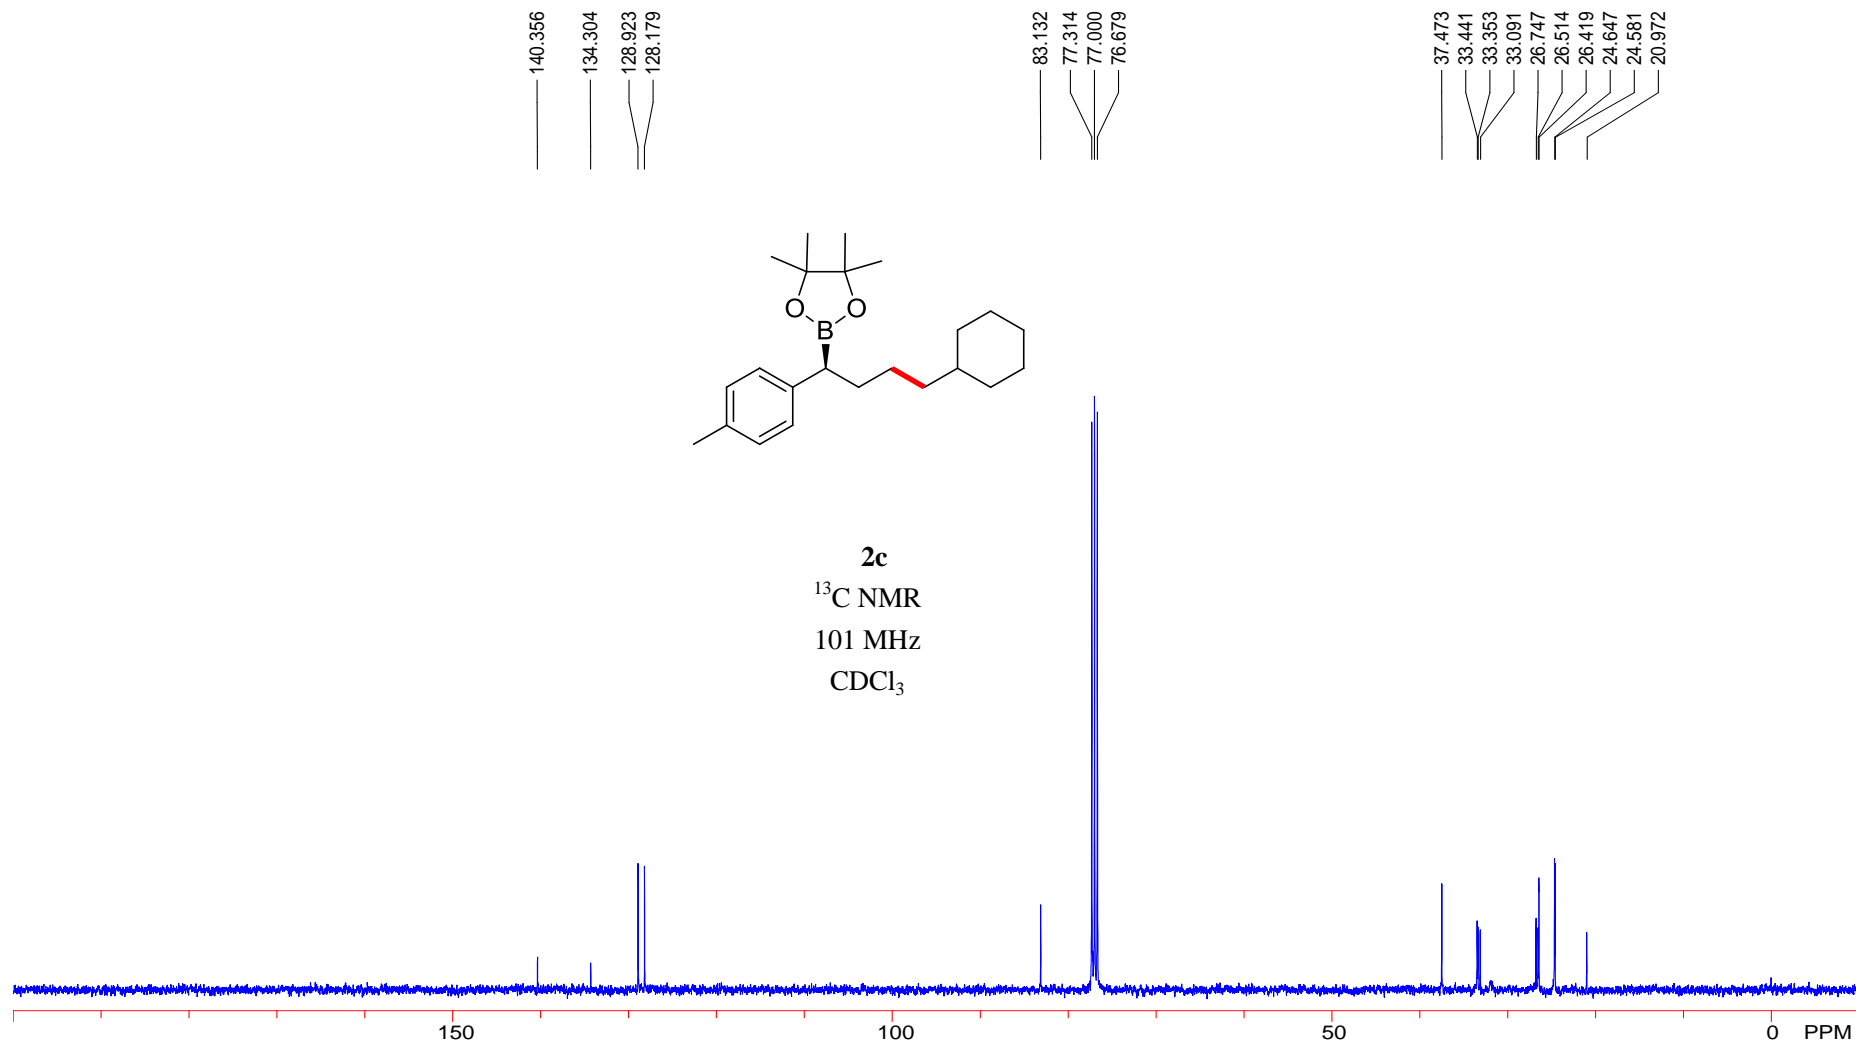

Supplementary Figure 130.  $^{13}\text{C}$  NMR spectrum for **2c**

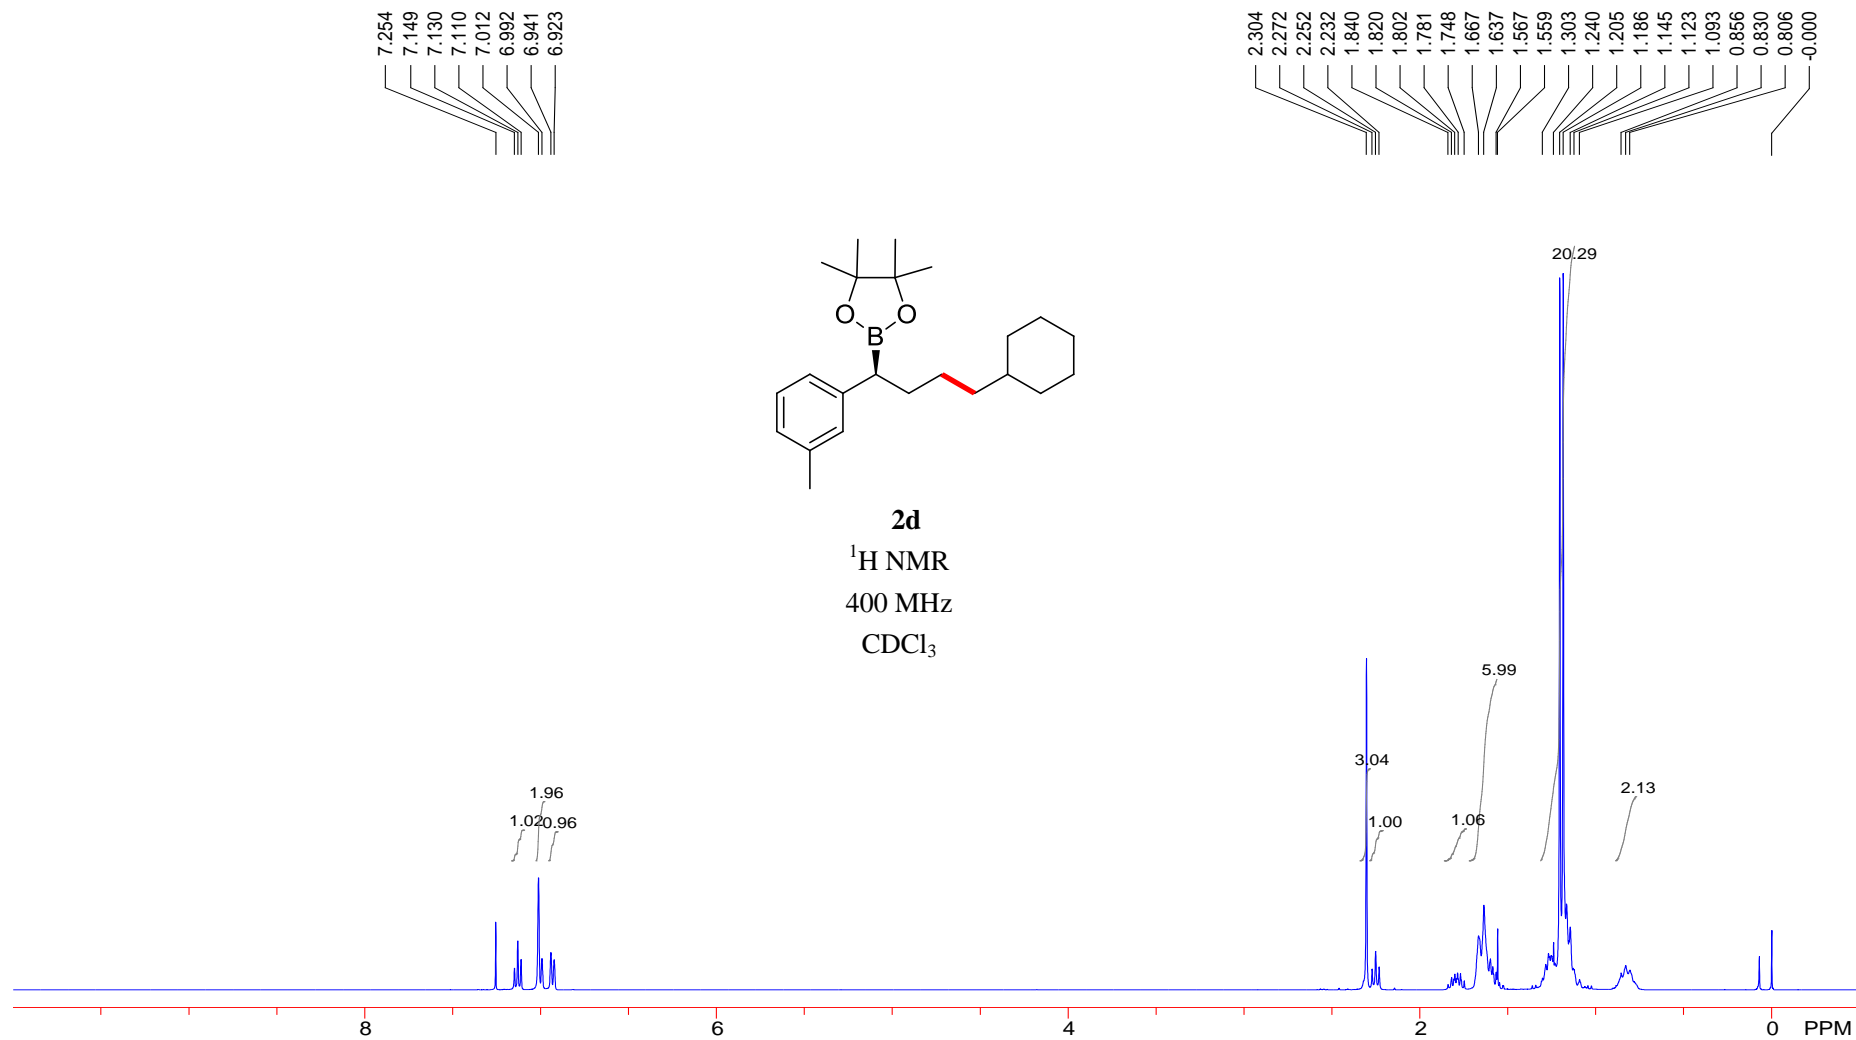

Supplementary Figure 131. <sup>1</sup>H NMR spectrum for **2d**

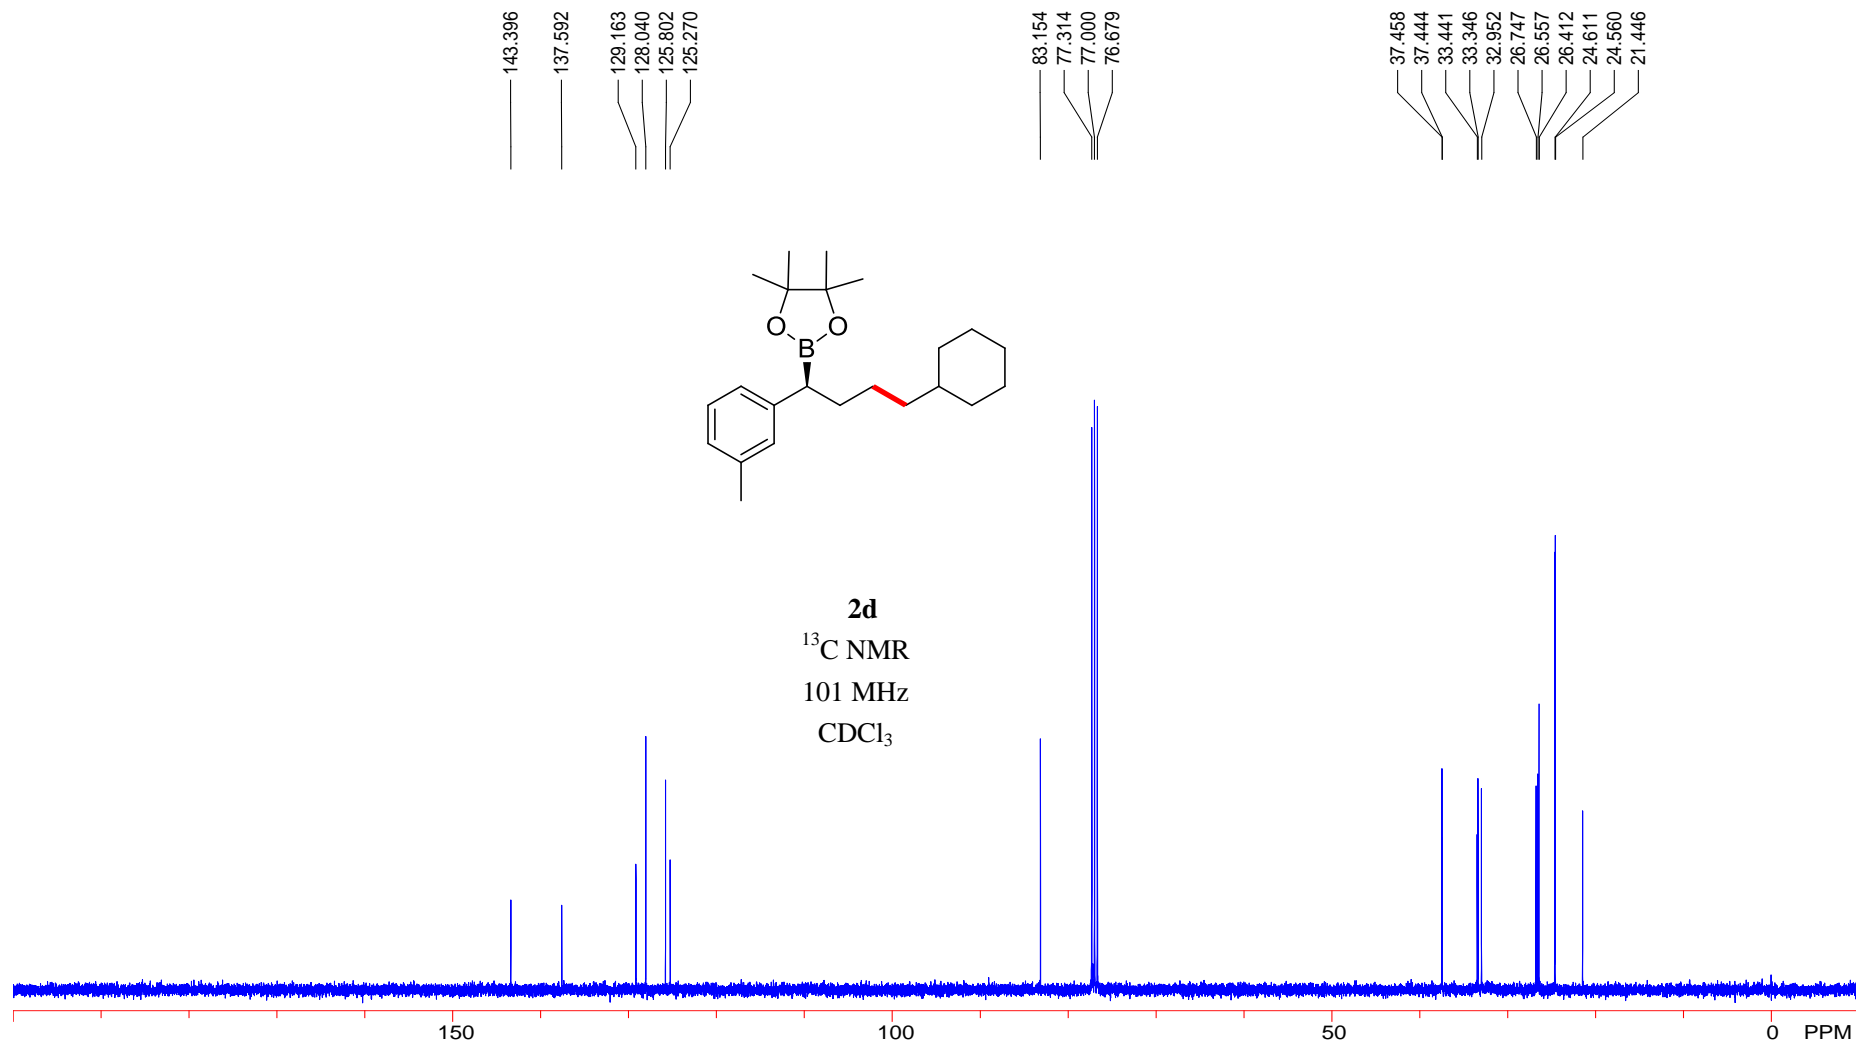

Supplementary Figure 132. <sup>13</sup>C NMR spectrum for **2d**

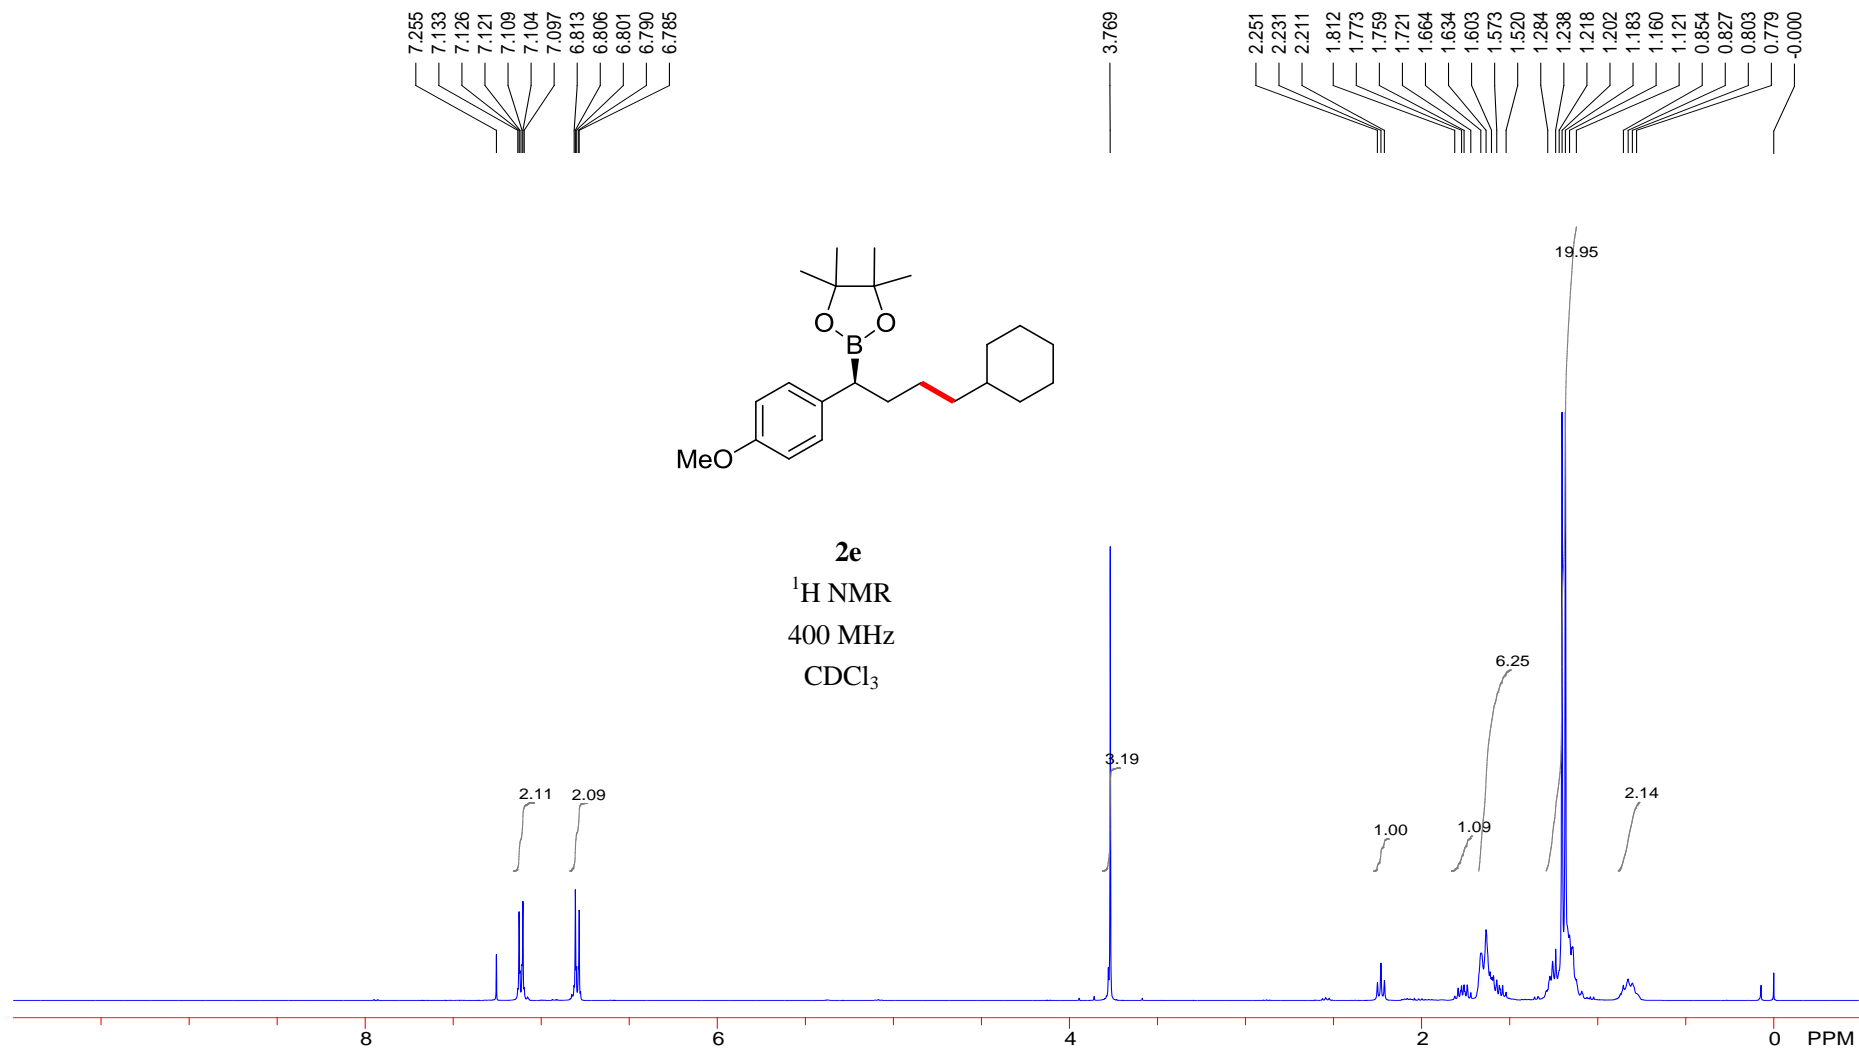

Supplementary Figure 133. <sup>1</sup>H NMR spectrum for **2e**

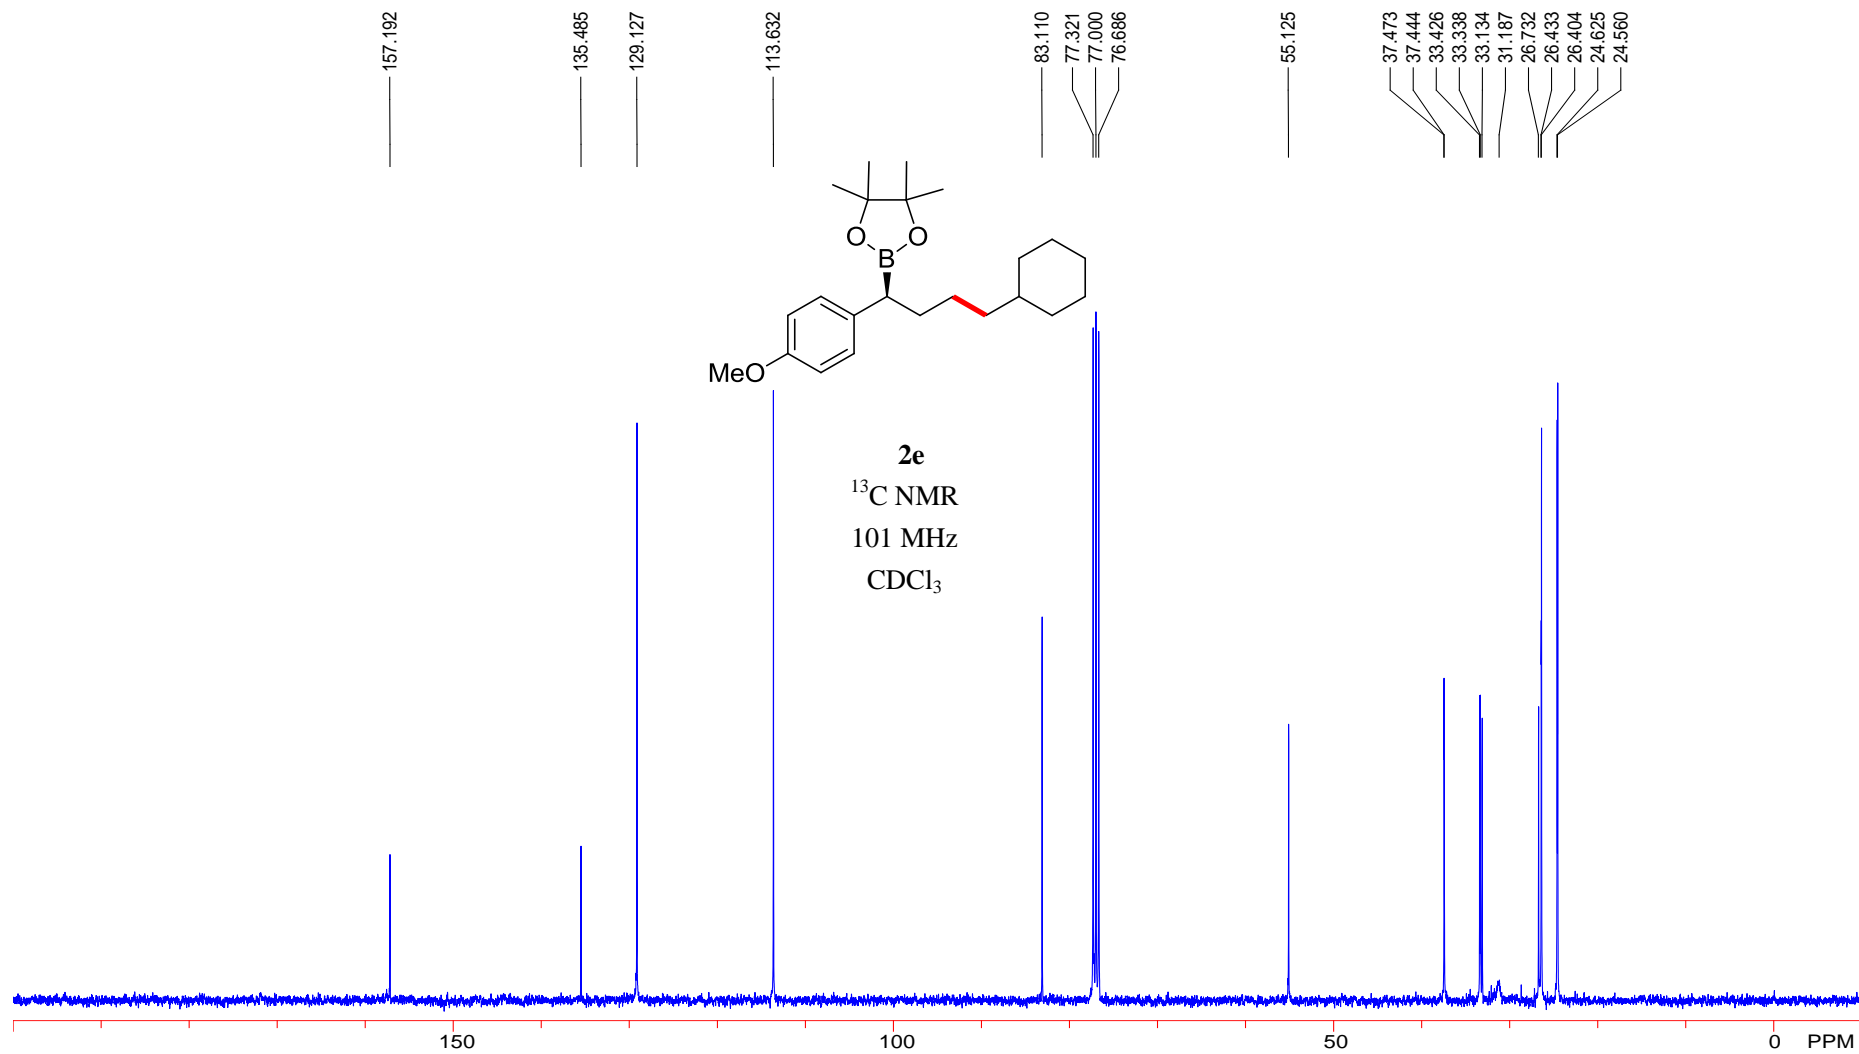

Supplementary Figure 134.  $^{13}\text{C}$  NMR spectrum for **2e**

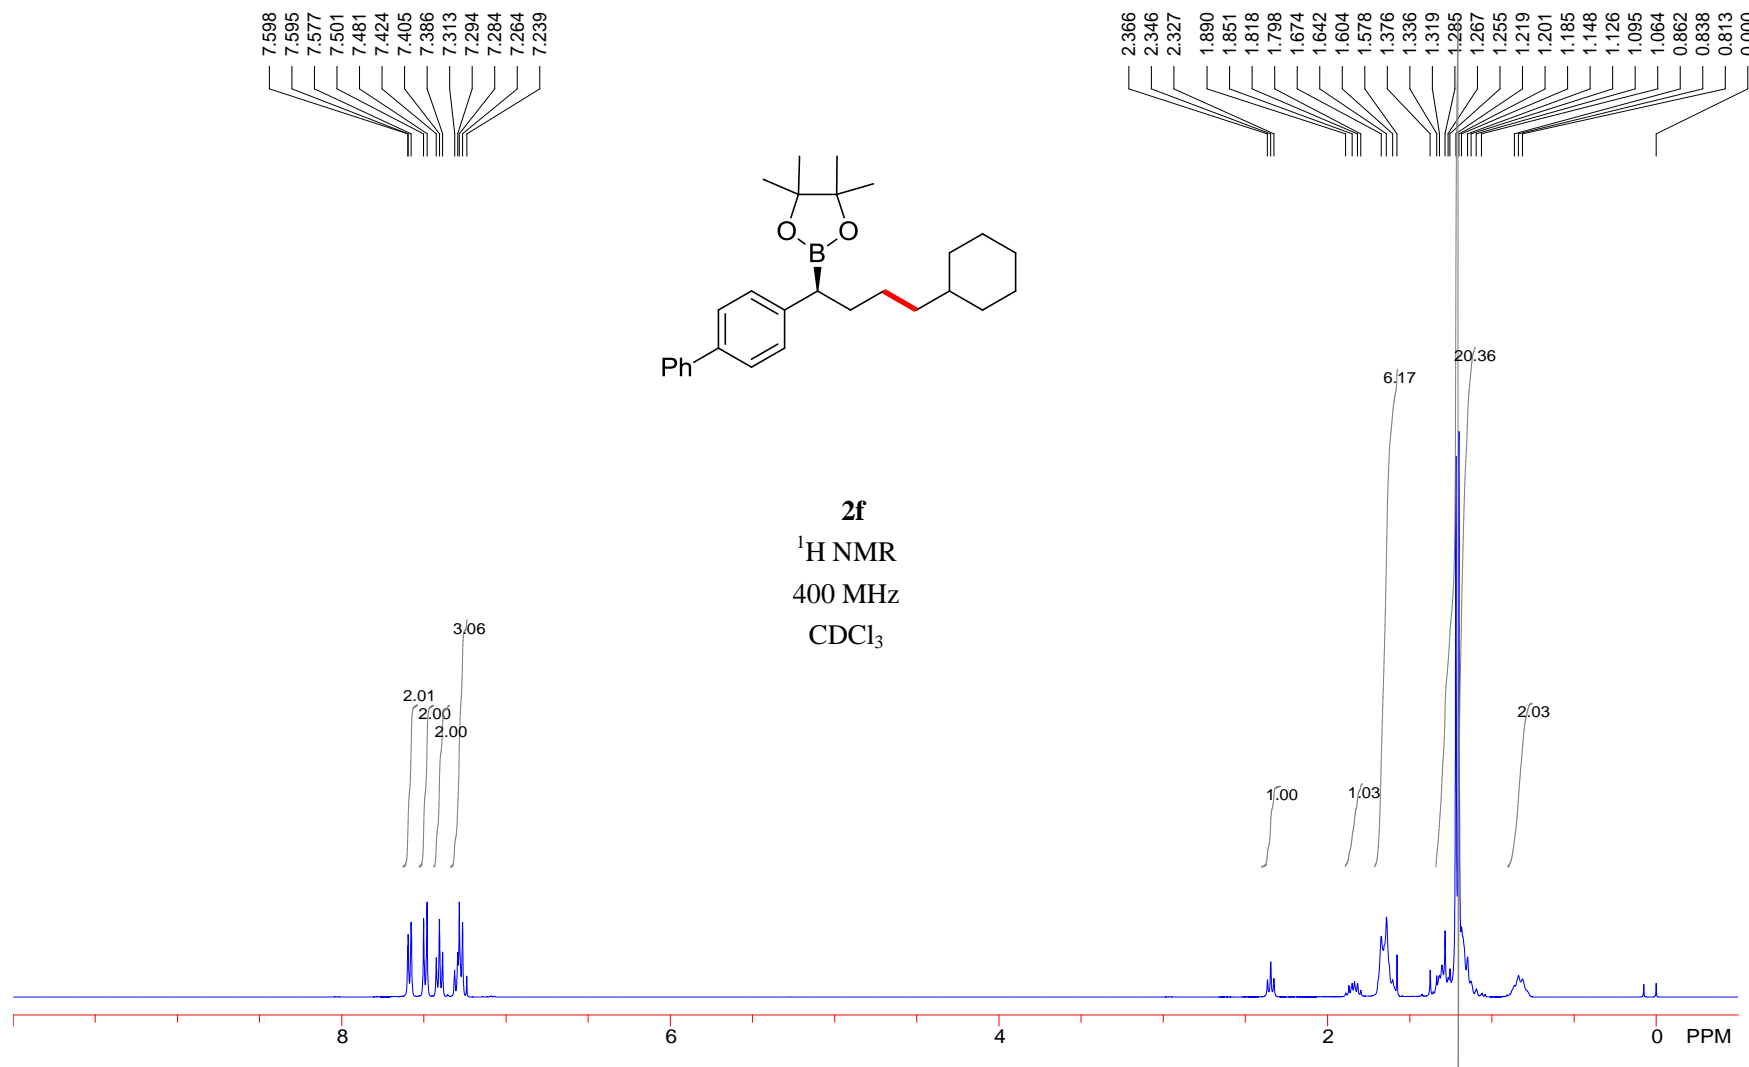

Supplementary Figure 135. <sup>1</sup>H NMR spectrum for **2f**



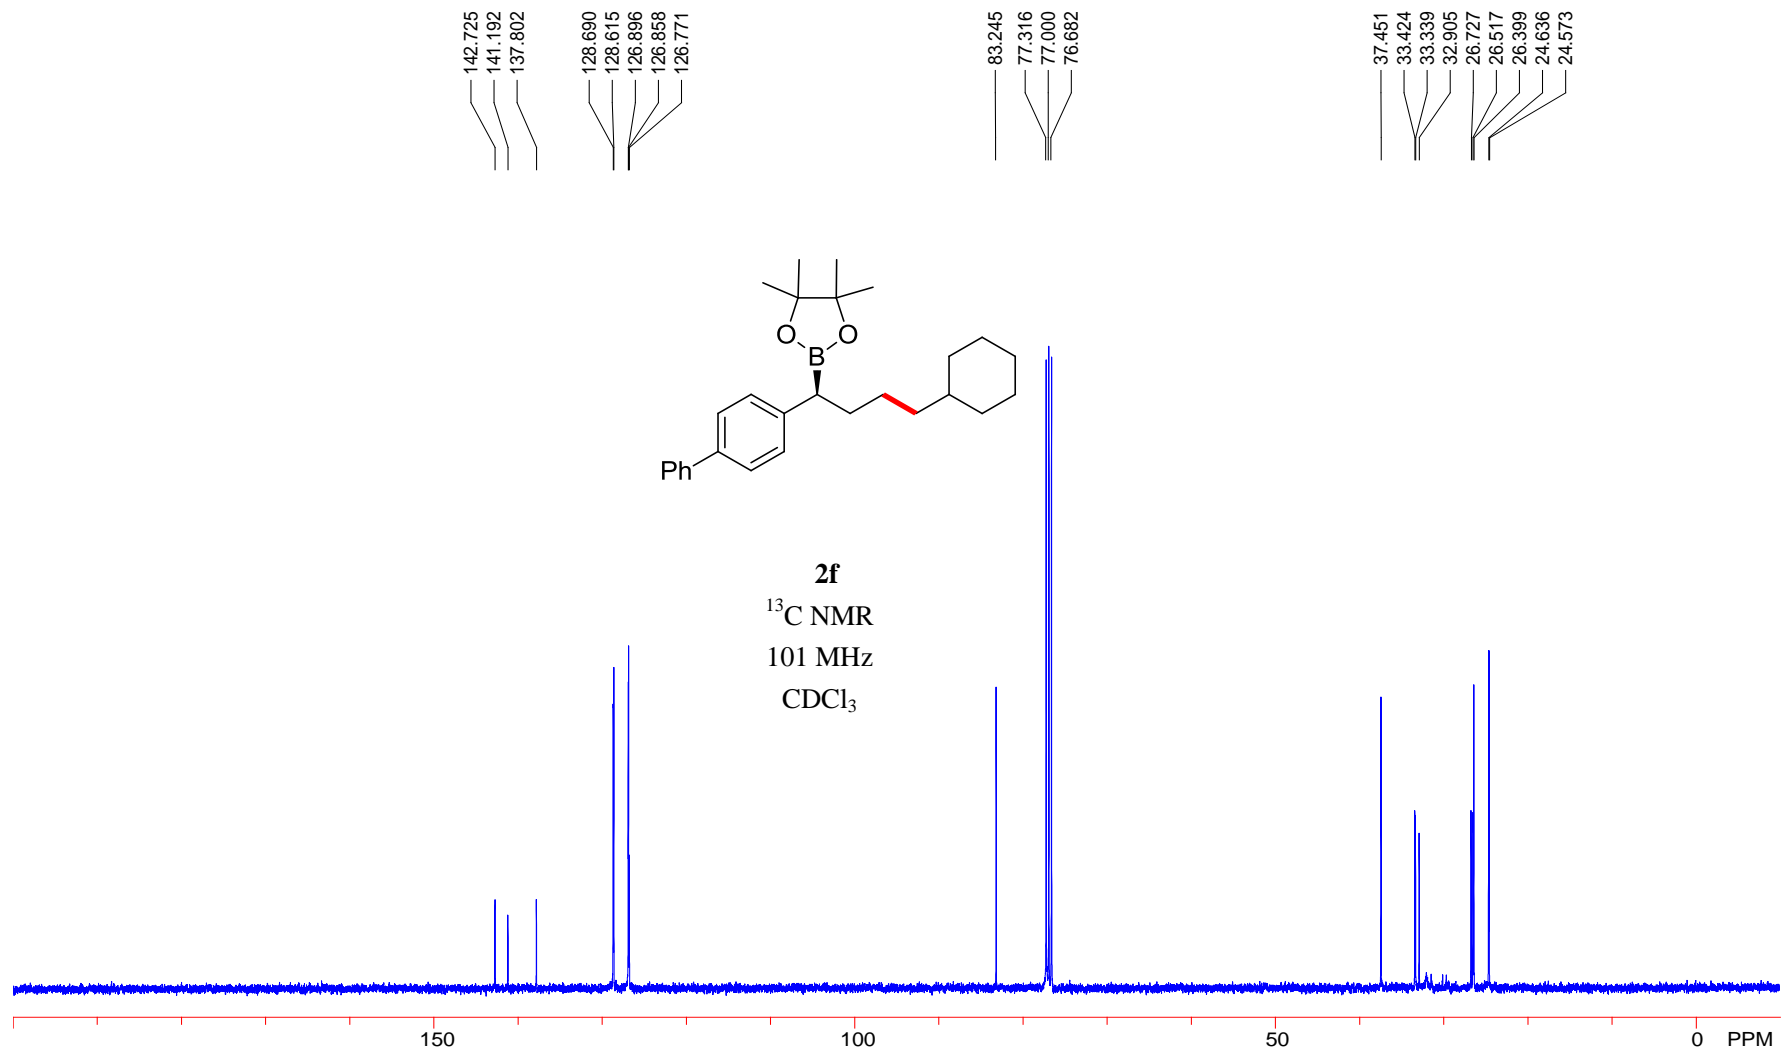

Supplementary Figure 136. <sup>13</sup>C NMR spectrum for **2f**

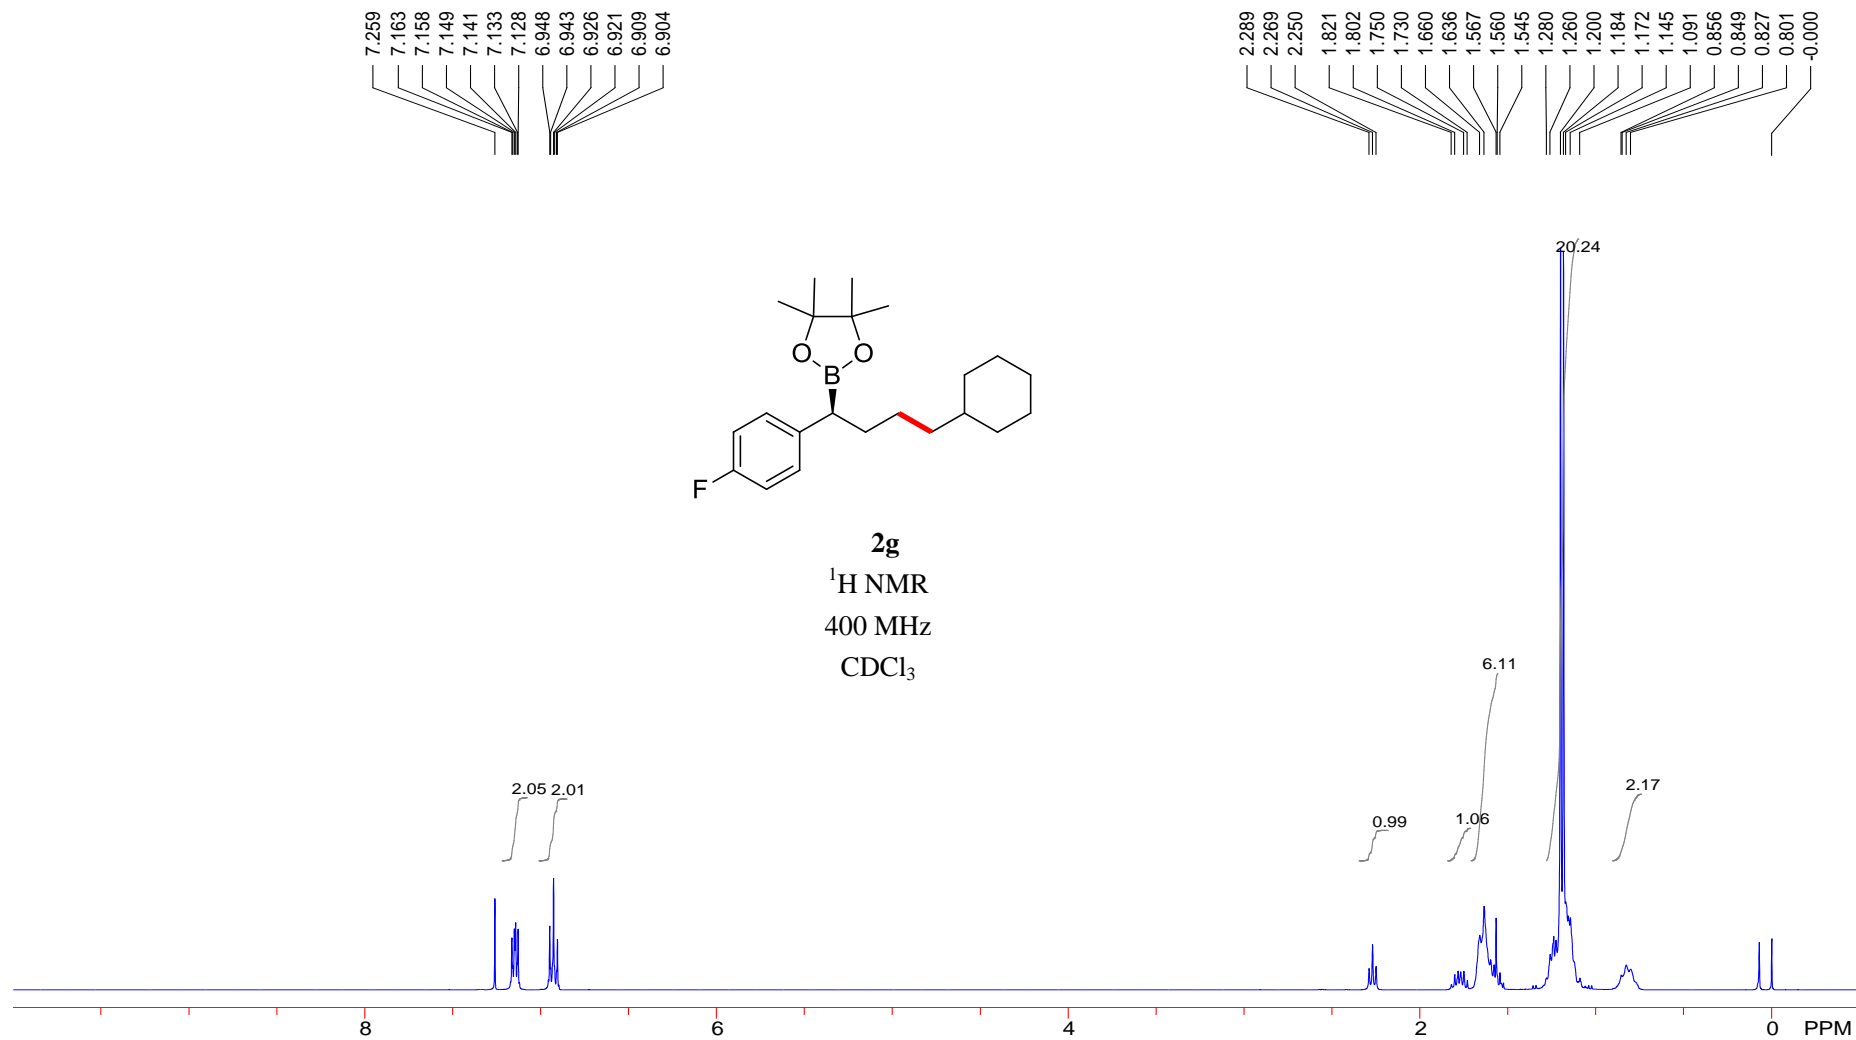

Supplementary Figure 137. <sup>1</sup>H NMR spectrum for **2g**

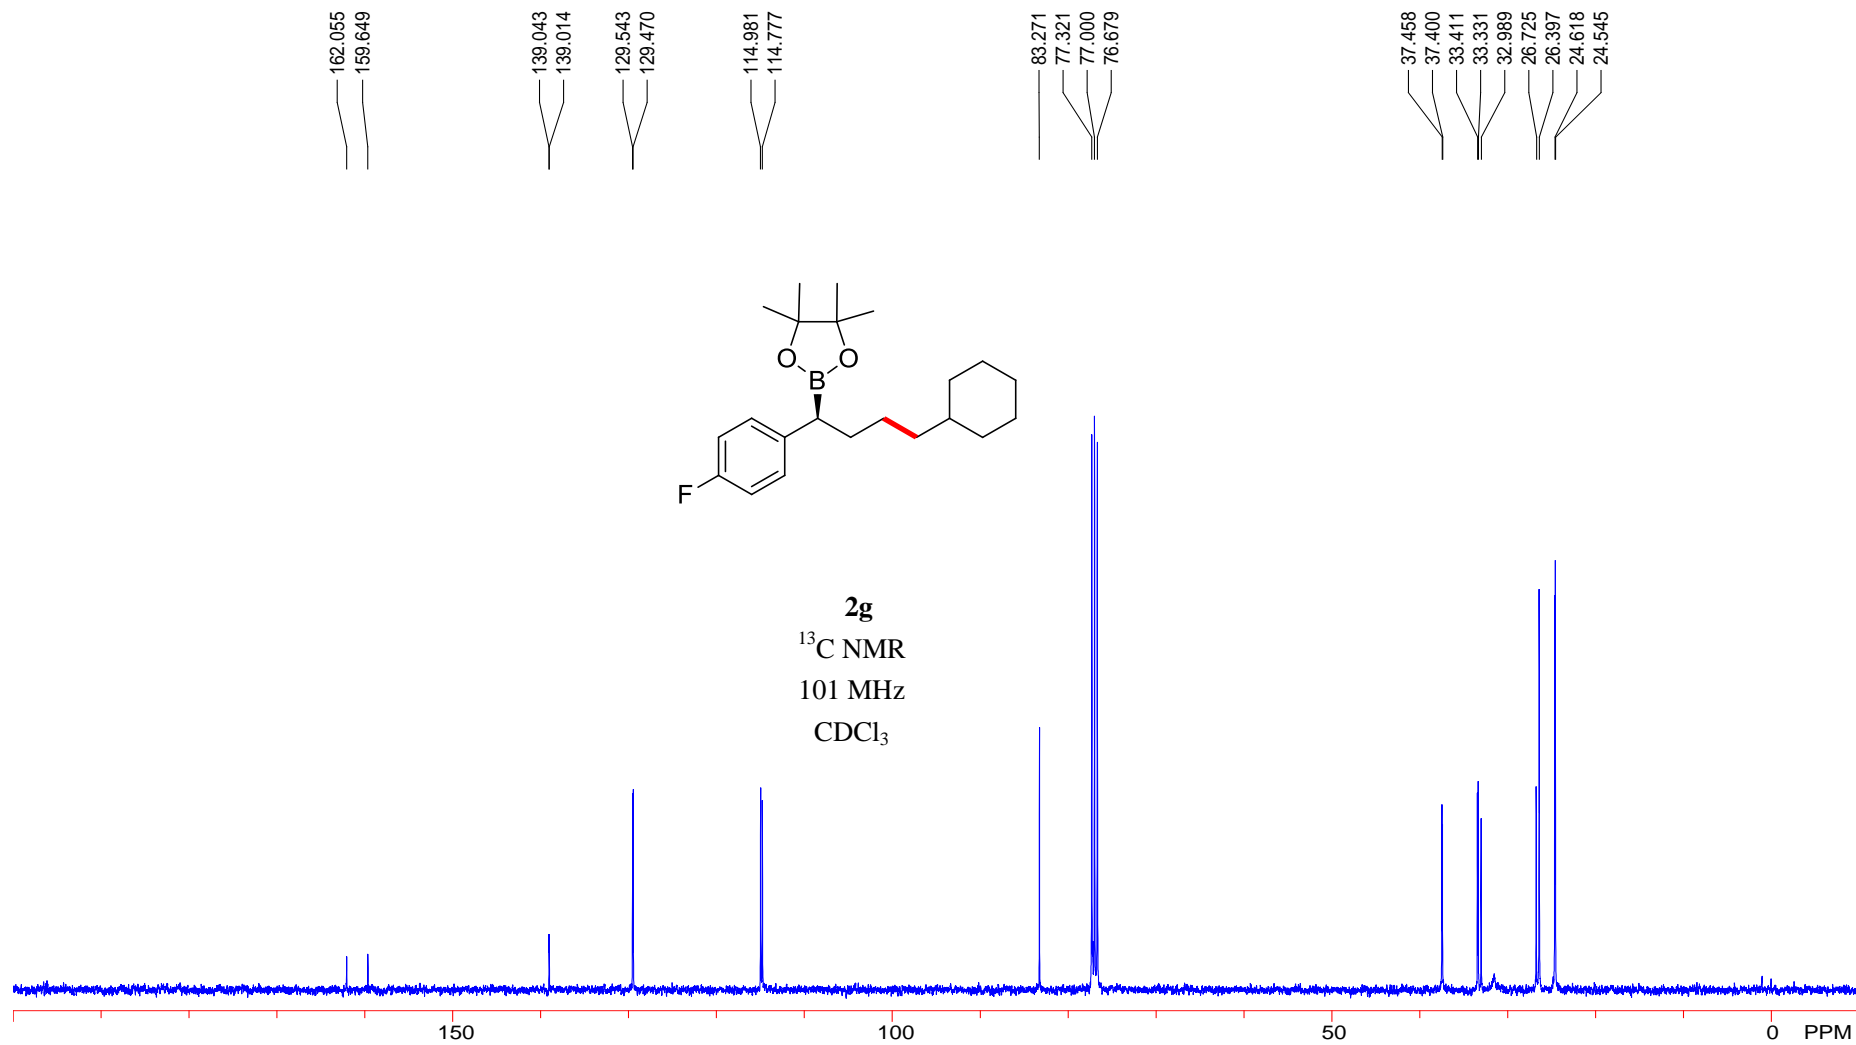

Supplementary Figure 138. <sup>13</sup>C NMR spectrum for **2g**

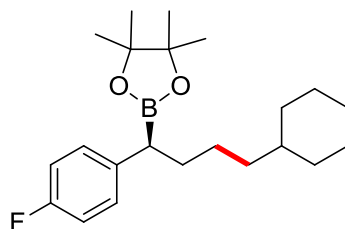

**2g**

<sup>19</sup>F NMR

376 MHz

CDCl<sub>3</sub>

118.983

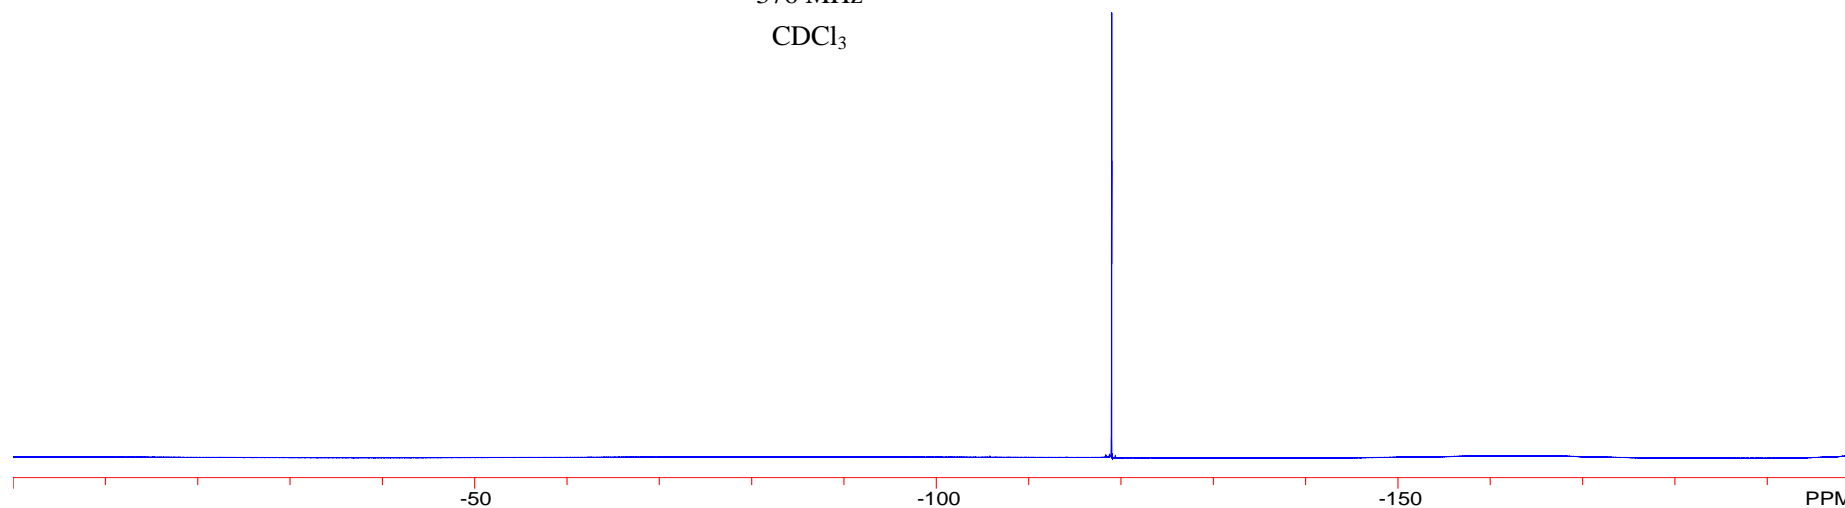

**Supplementary Figure 139.** <sup>19</sup>F NMR spectrum for **2g**

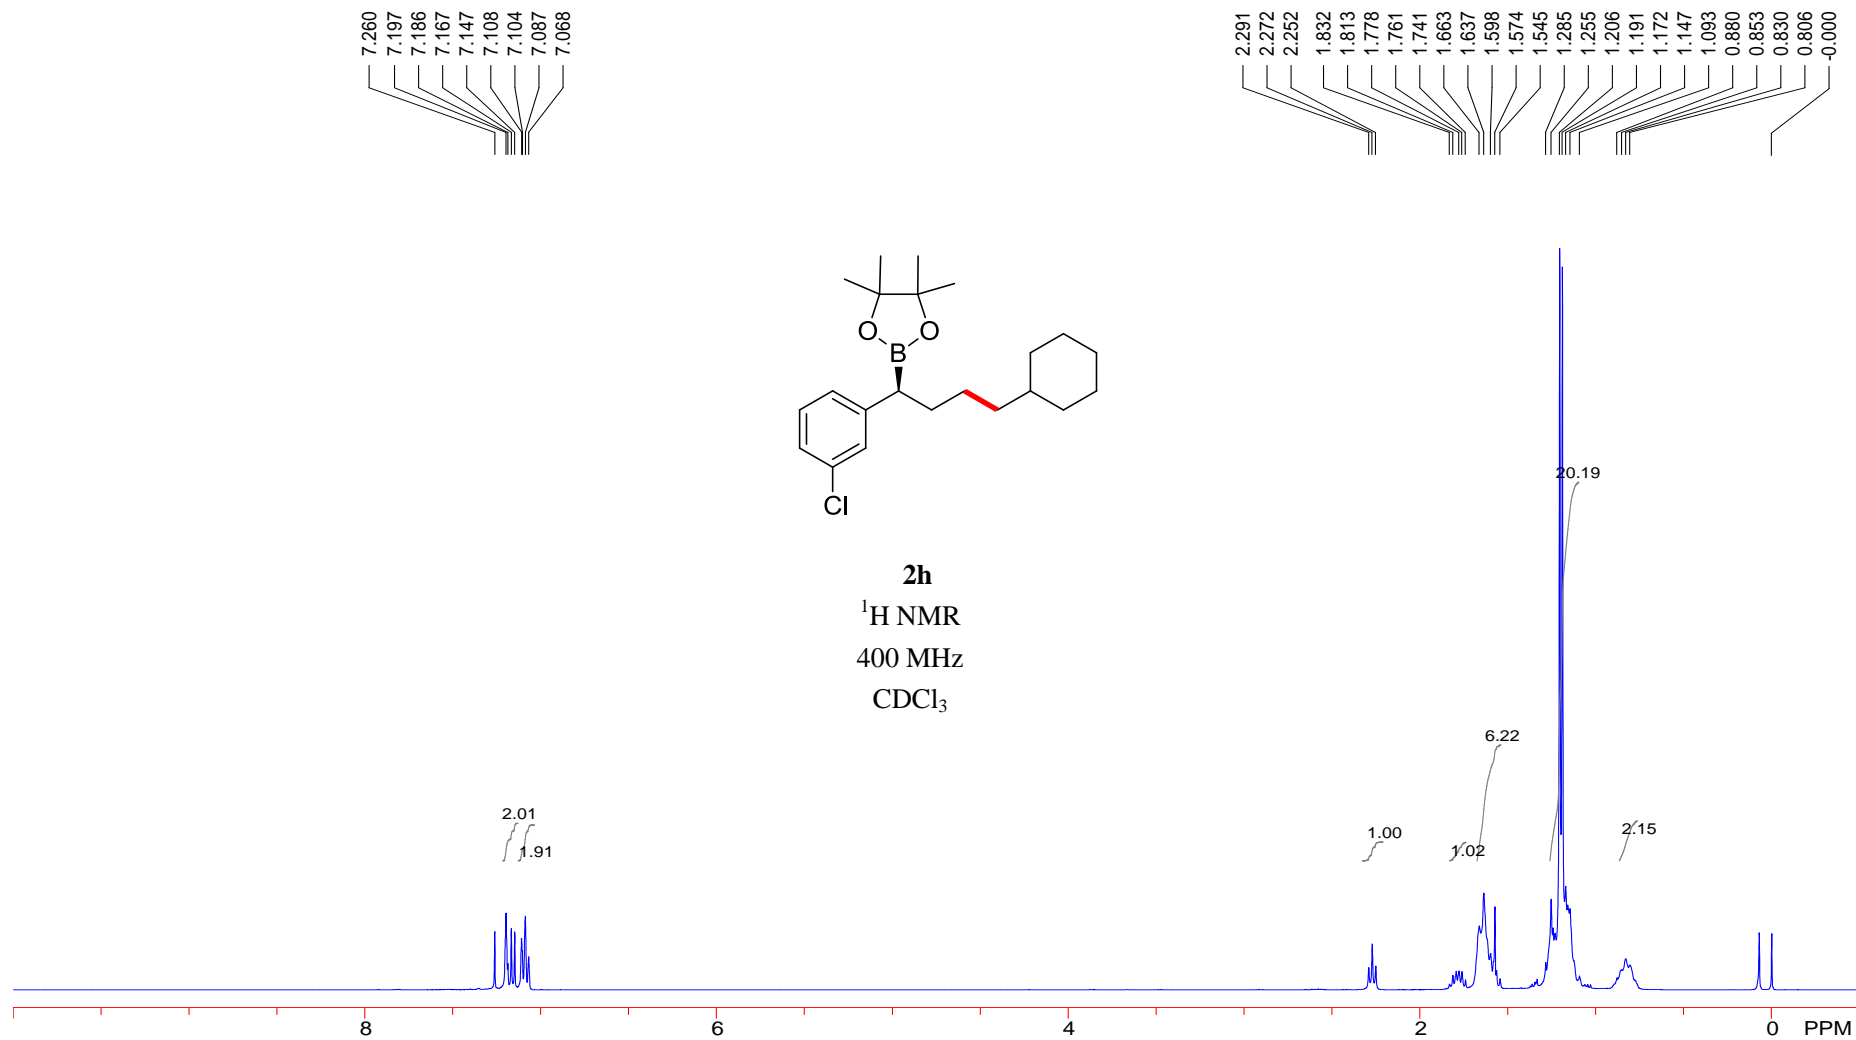

Supplementary Figure 140. <sup>1</sup>H NMR spectrum for **2h**

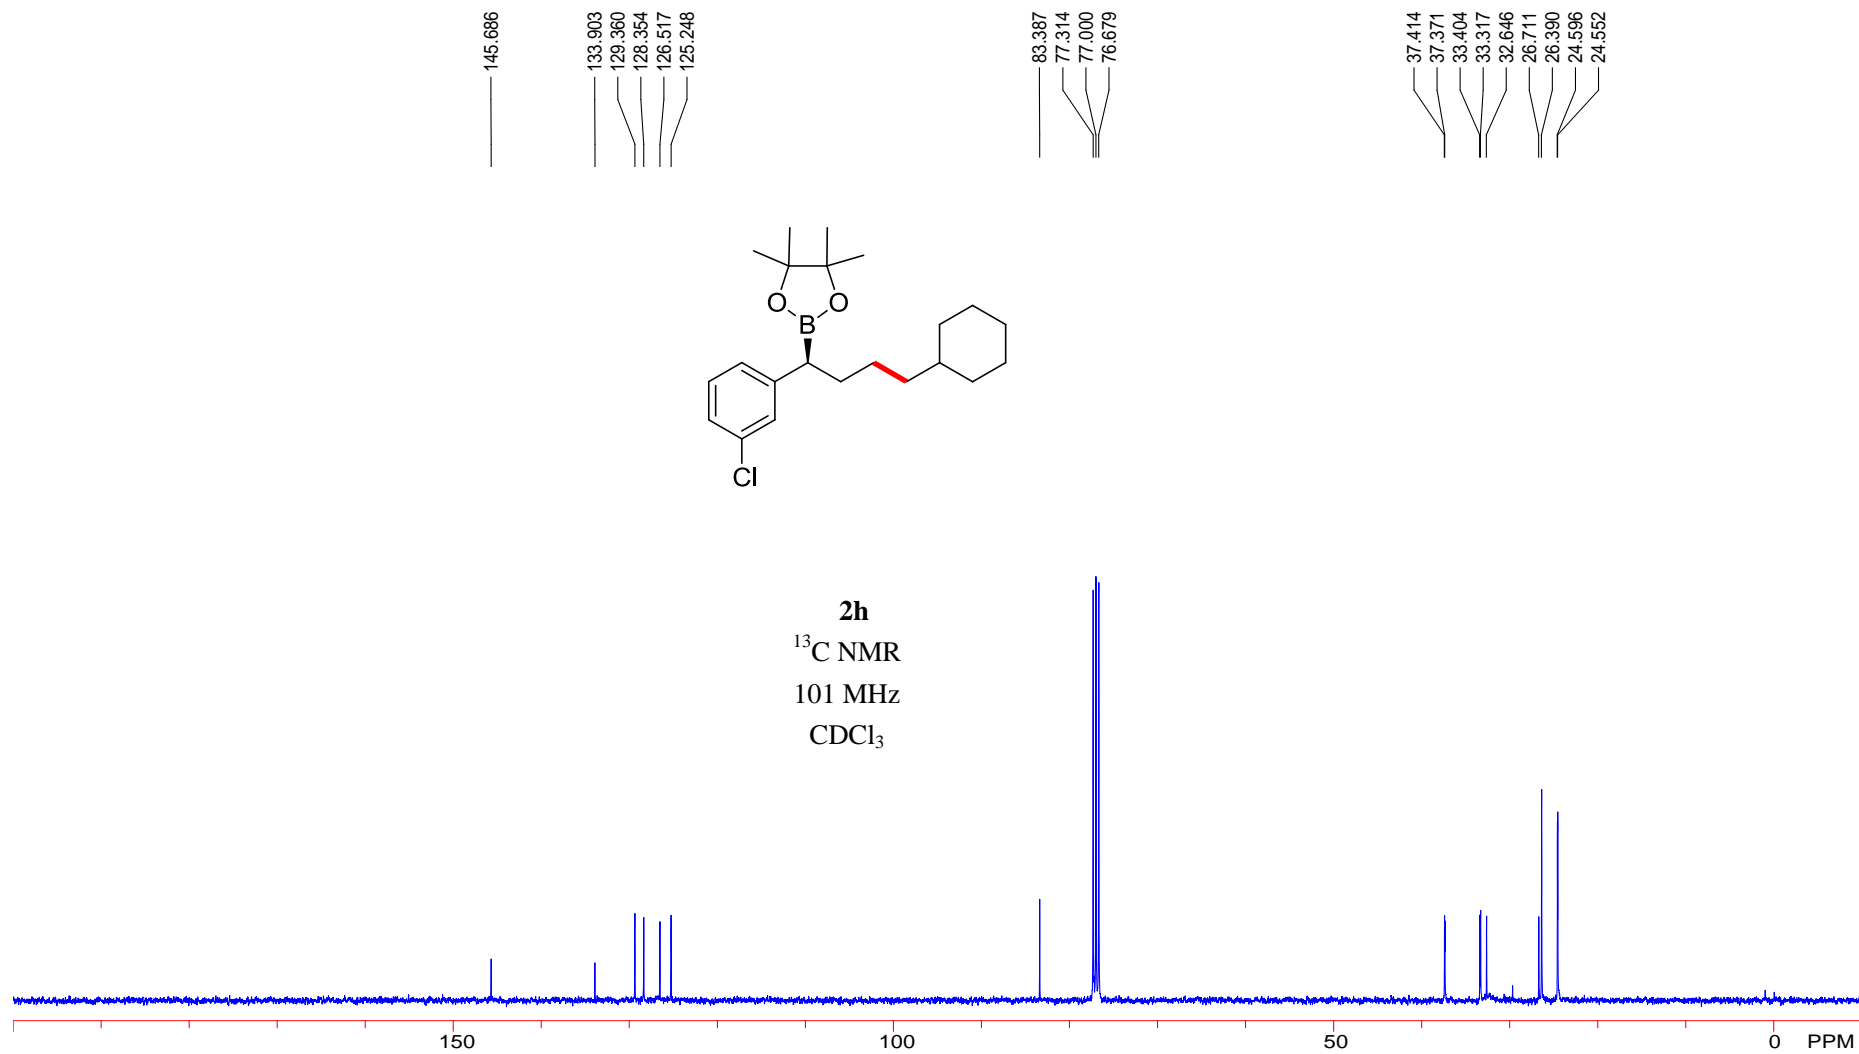

Supplementary Figure 141. <sup>13</sup>C NMR spectrum for **2h**

7.355  
7.257  
7.243  
7.240  
7.235  
7.138  
7.134  
7.116  
7.098  
7.078

2.278  
2.259  
2.239  
1.809  
1.791  
1.758  
1.737  
1.664  
1.638  
1.594  
1.580  
1.561  
1.288  
1.267  
1.236  
1.203  
1.189  
1.173  
1.149  
1.095  
0.855  
0.832  
0.808  
0.000

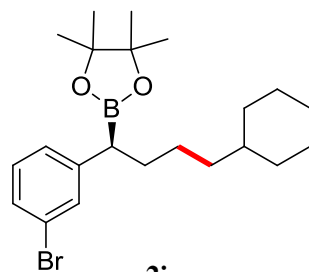

<sup>1</sup>H NMR  
400 MHz  
CDCl<sub>3</sub>

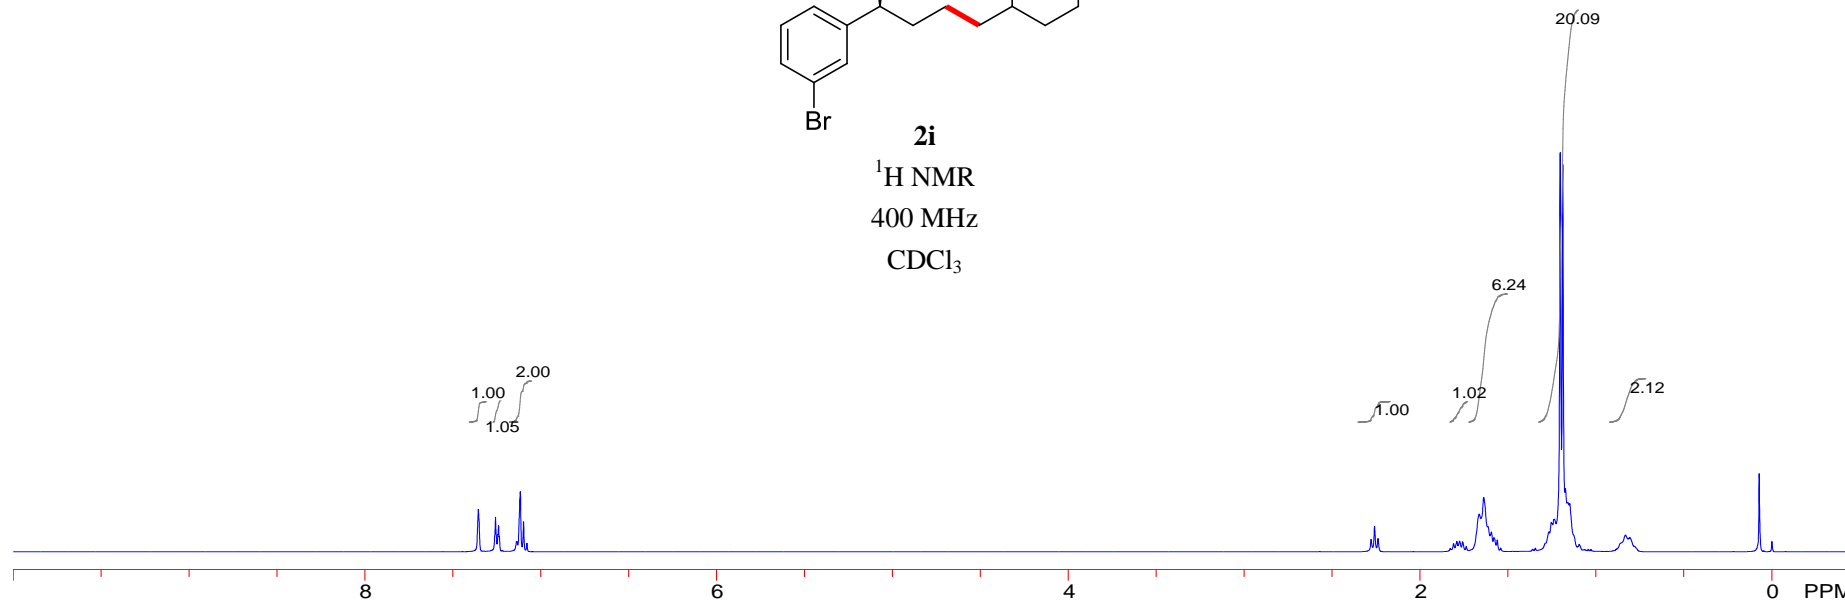

Supplementary Figure 142. <sup>1</sup>H NMR spectrum for **2i**

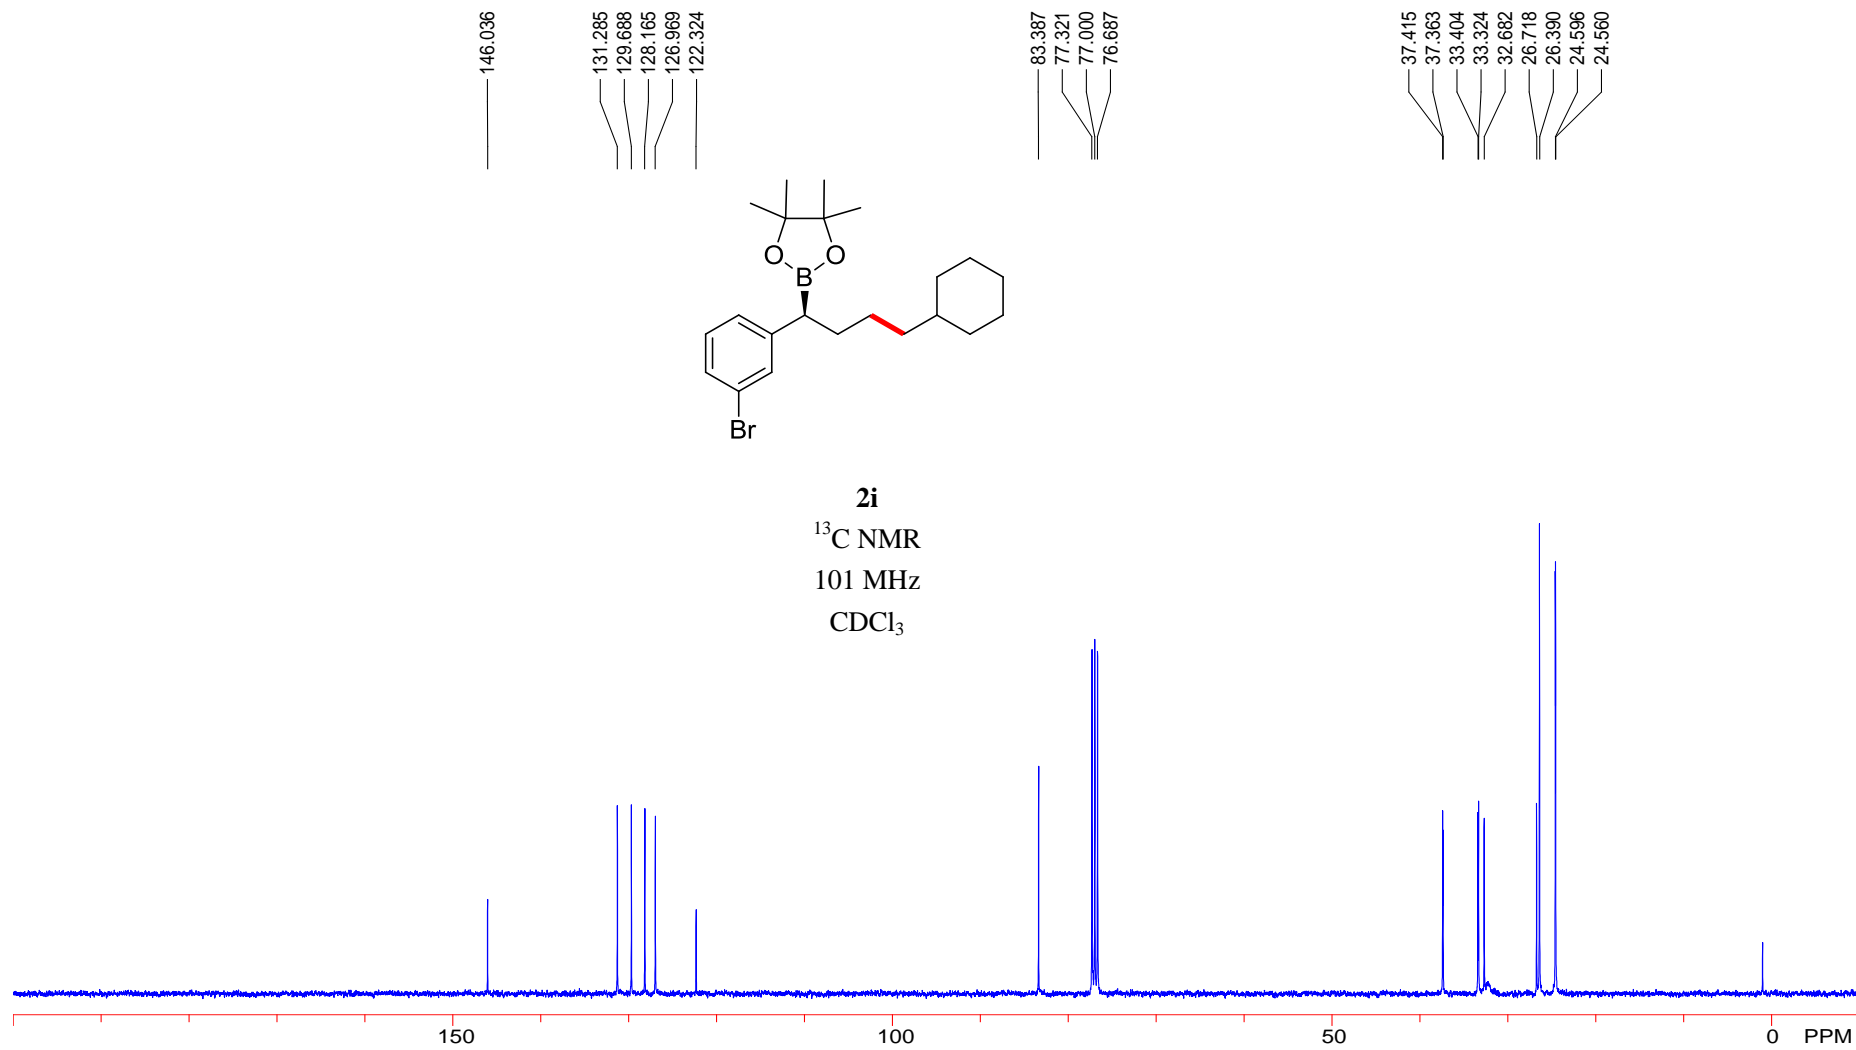

Supplementary Figure 143. <sup>13</sup>C NMR spectrum for **2i**



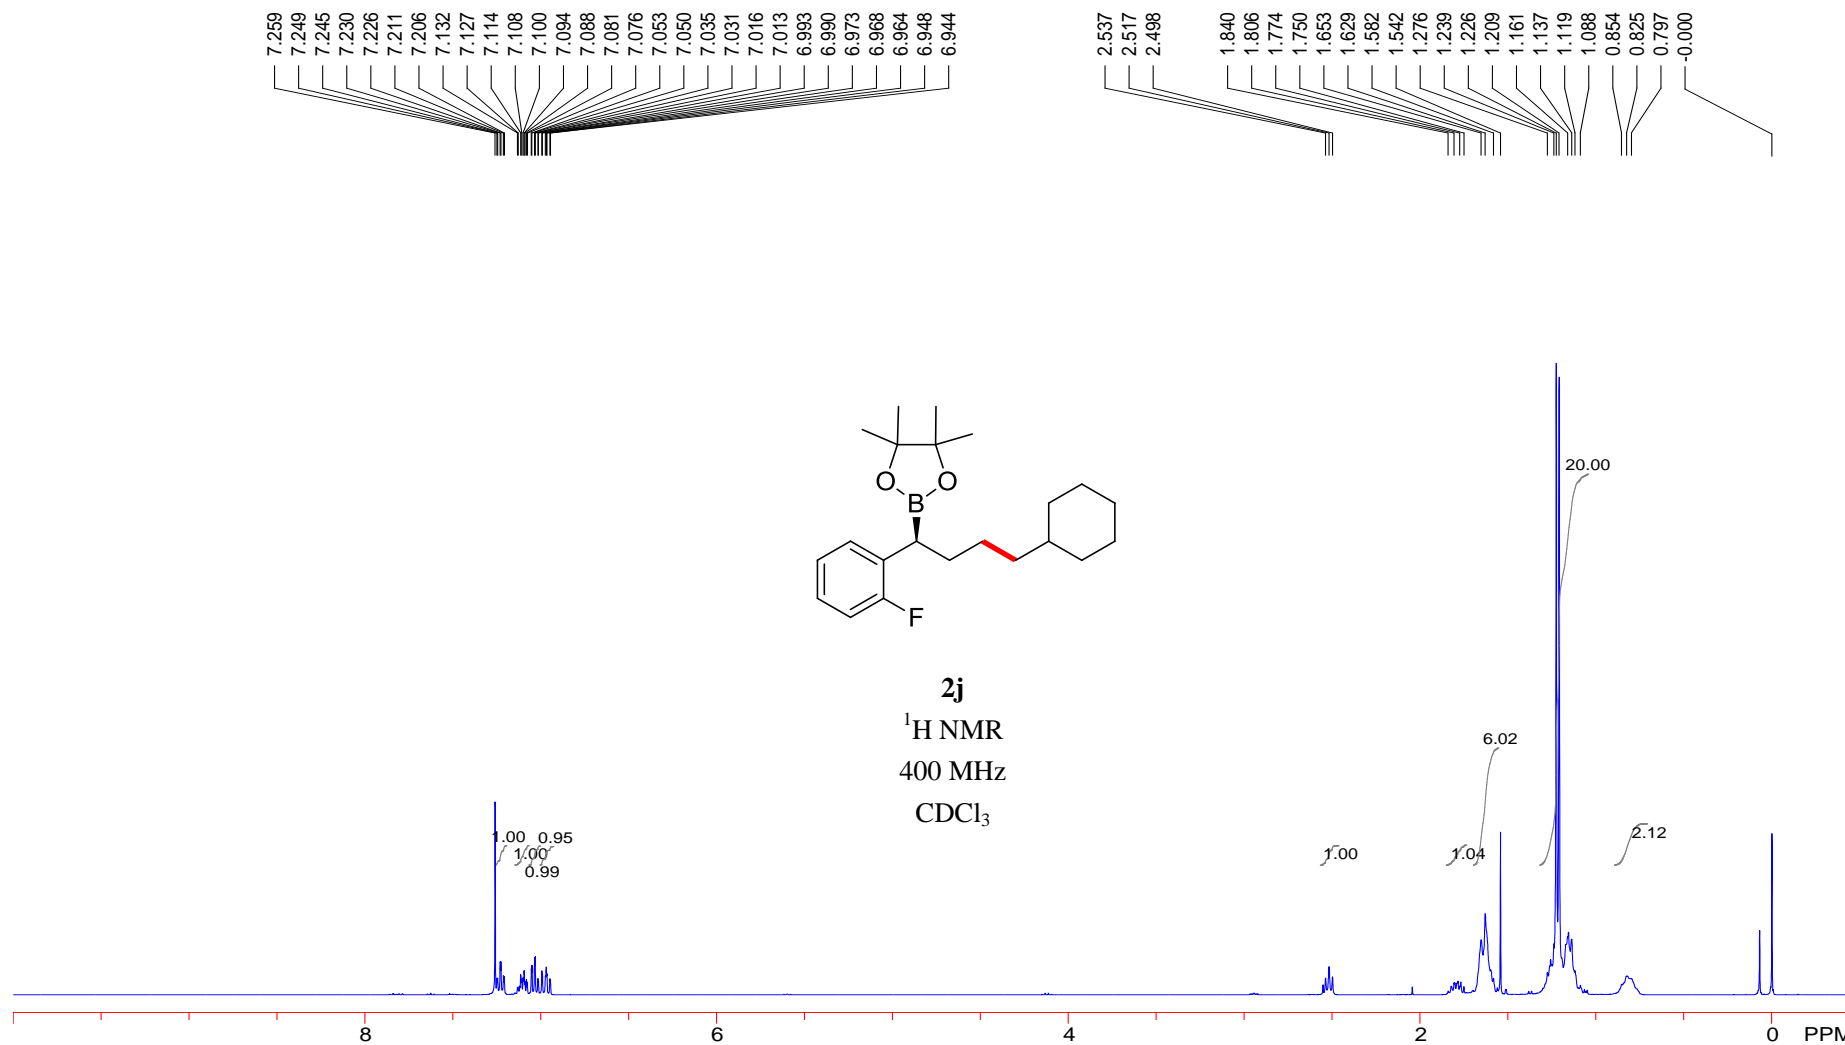

Supplementary Figure 144. <sup>1</sup>H NMR spectrum for **2j**

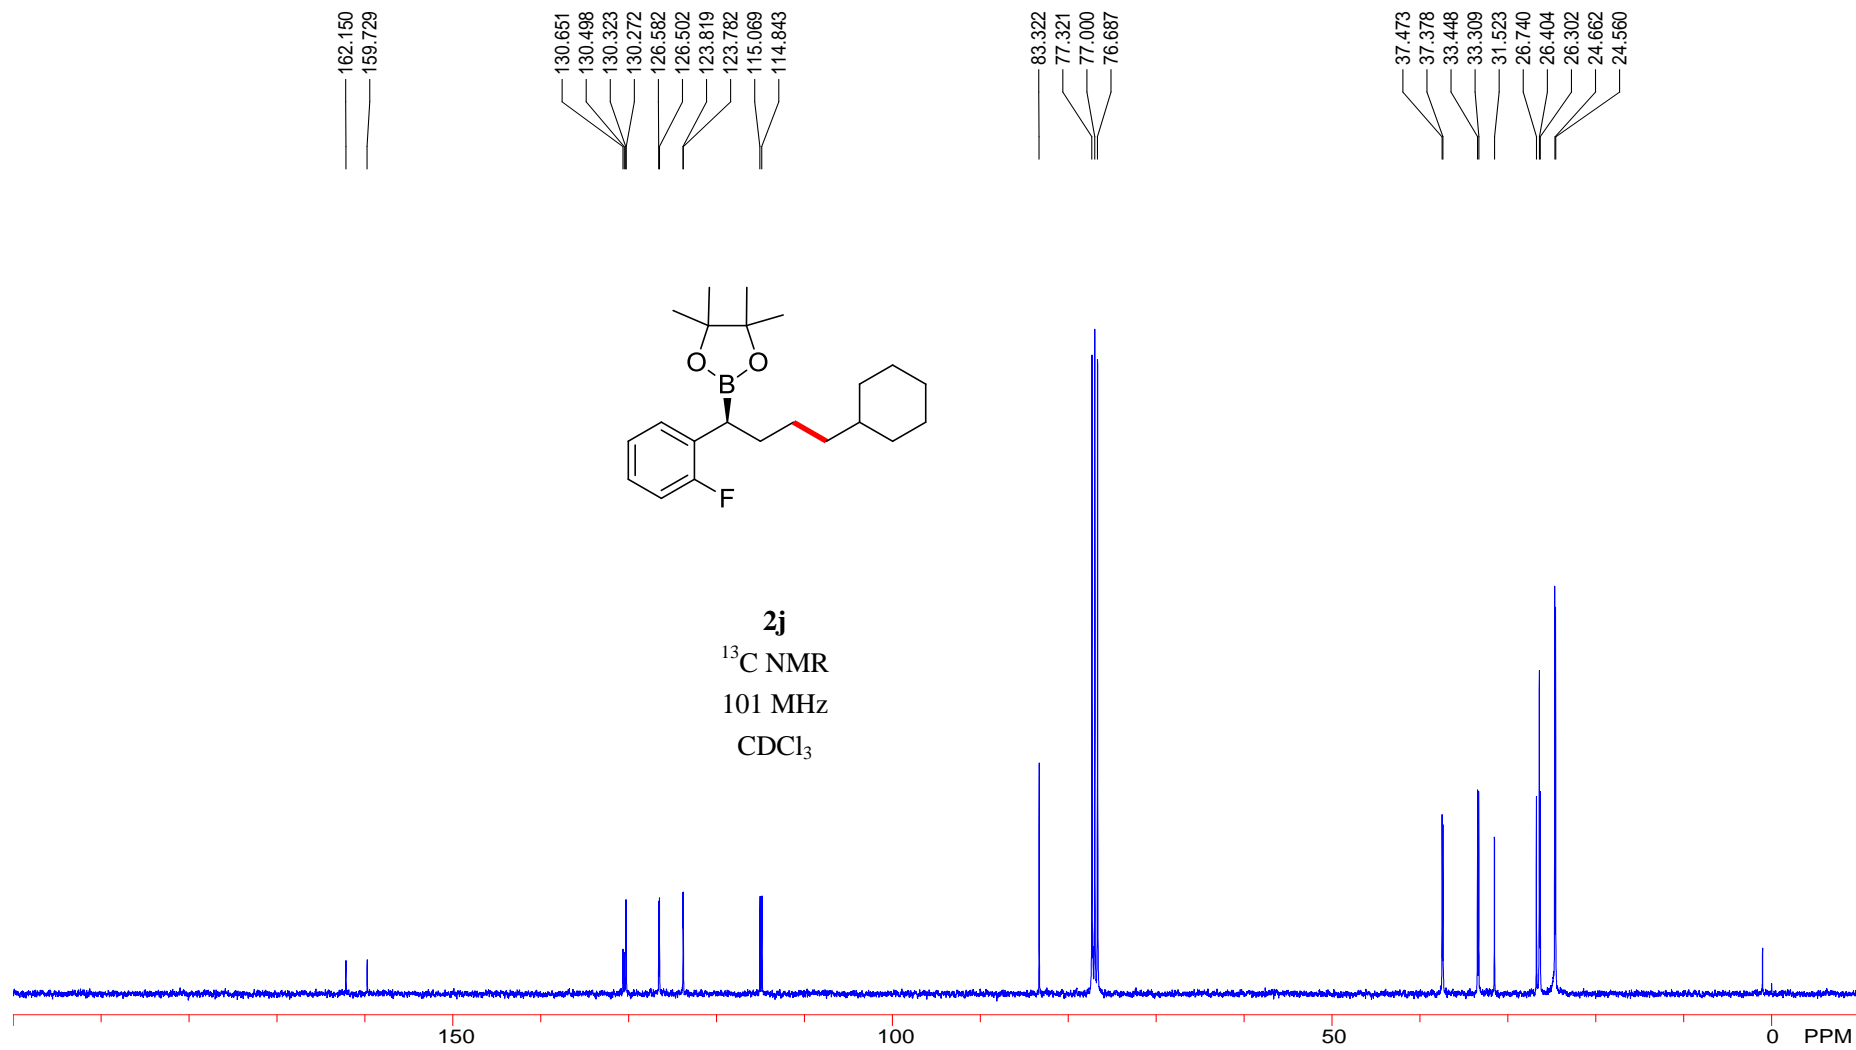

Supplementary Figure 145. <sup>13</sup>C NMR spectrum for **2j**

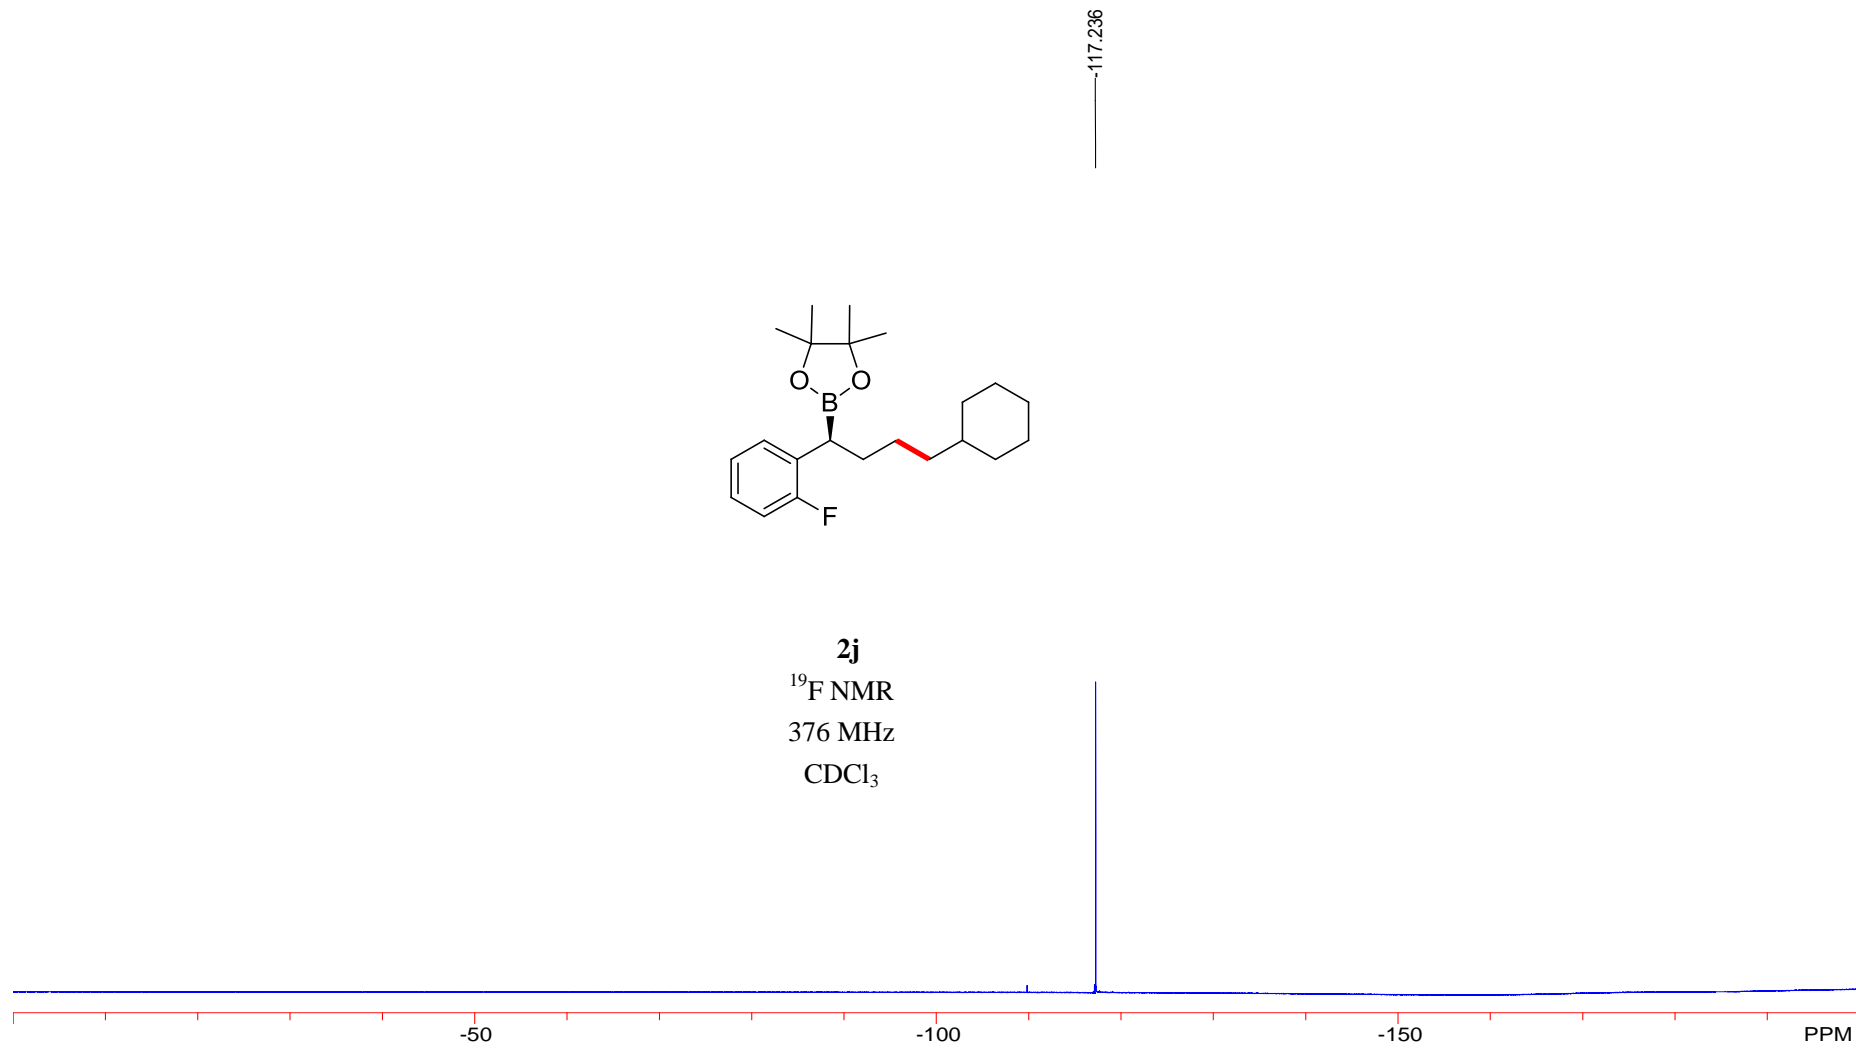

Supplementary Figure 146. <sup>19</sup>F NMR spectrum for **2j**

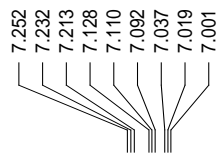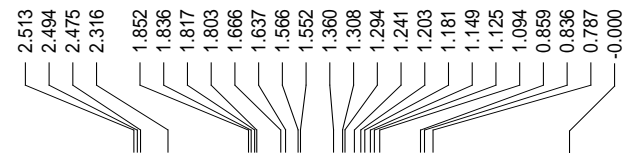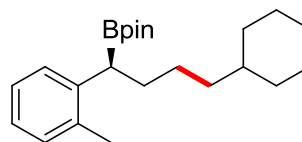

**2k**  
<sup>1</sup>H NMR  
400 MHz  
CDCl<sub>3</sub>

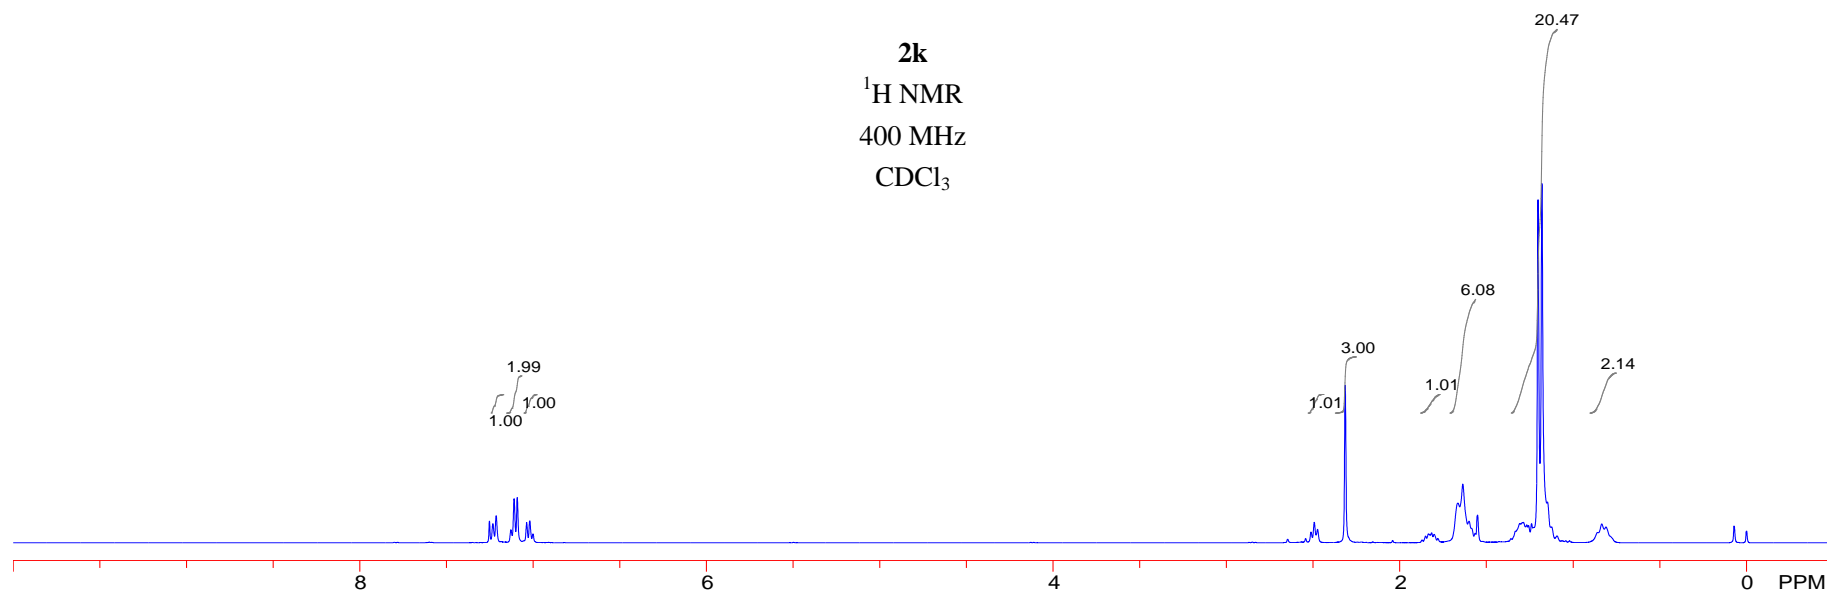

Supplementary Figure 147. <sup>1</sup>H NMR spectrum for **2k**

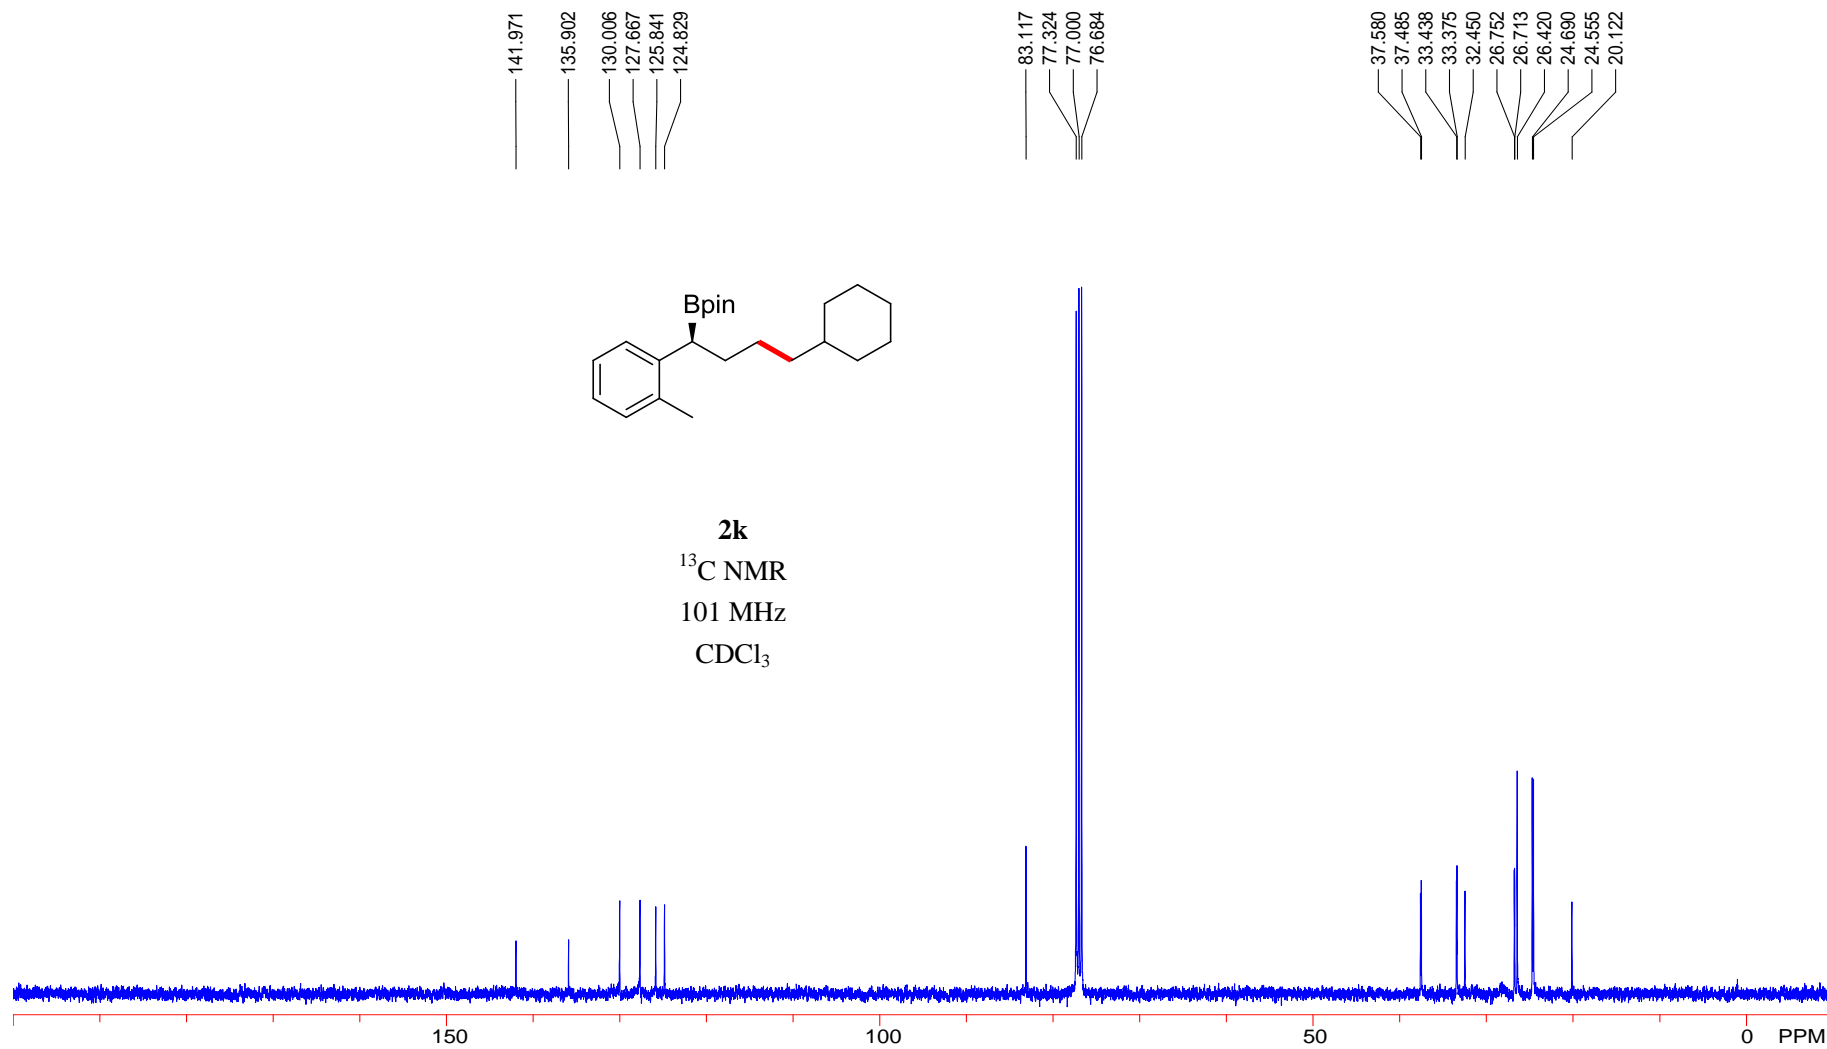

Supplementary Figure 148.  $^{13}\text{C}$  NMR spectrum for **2k**

7.468  
7.392  
7.376  
7.361  
7.348  
7.338  
7.325  
7.259

2.383  
2.363  
2.343  
1.852  
1.834  
1.817  
1.801  
1.780  
1.663  
1.640  
1.611  
1.592  
1.573  
1.280  
1.226  
1.202  
1.190  
1.169  
1.132  
1.094  
0.863  
0.855  
0.832  
0.806  
-0.000

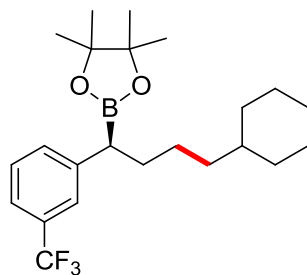

**21**  
<sup>1</sup>H NMR  
400 MHz  
CDCl<sub>3</sub>

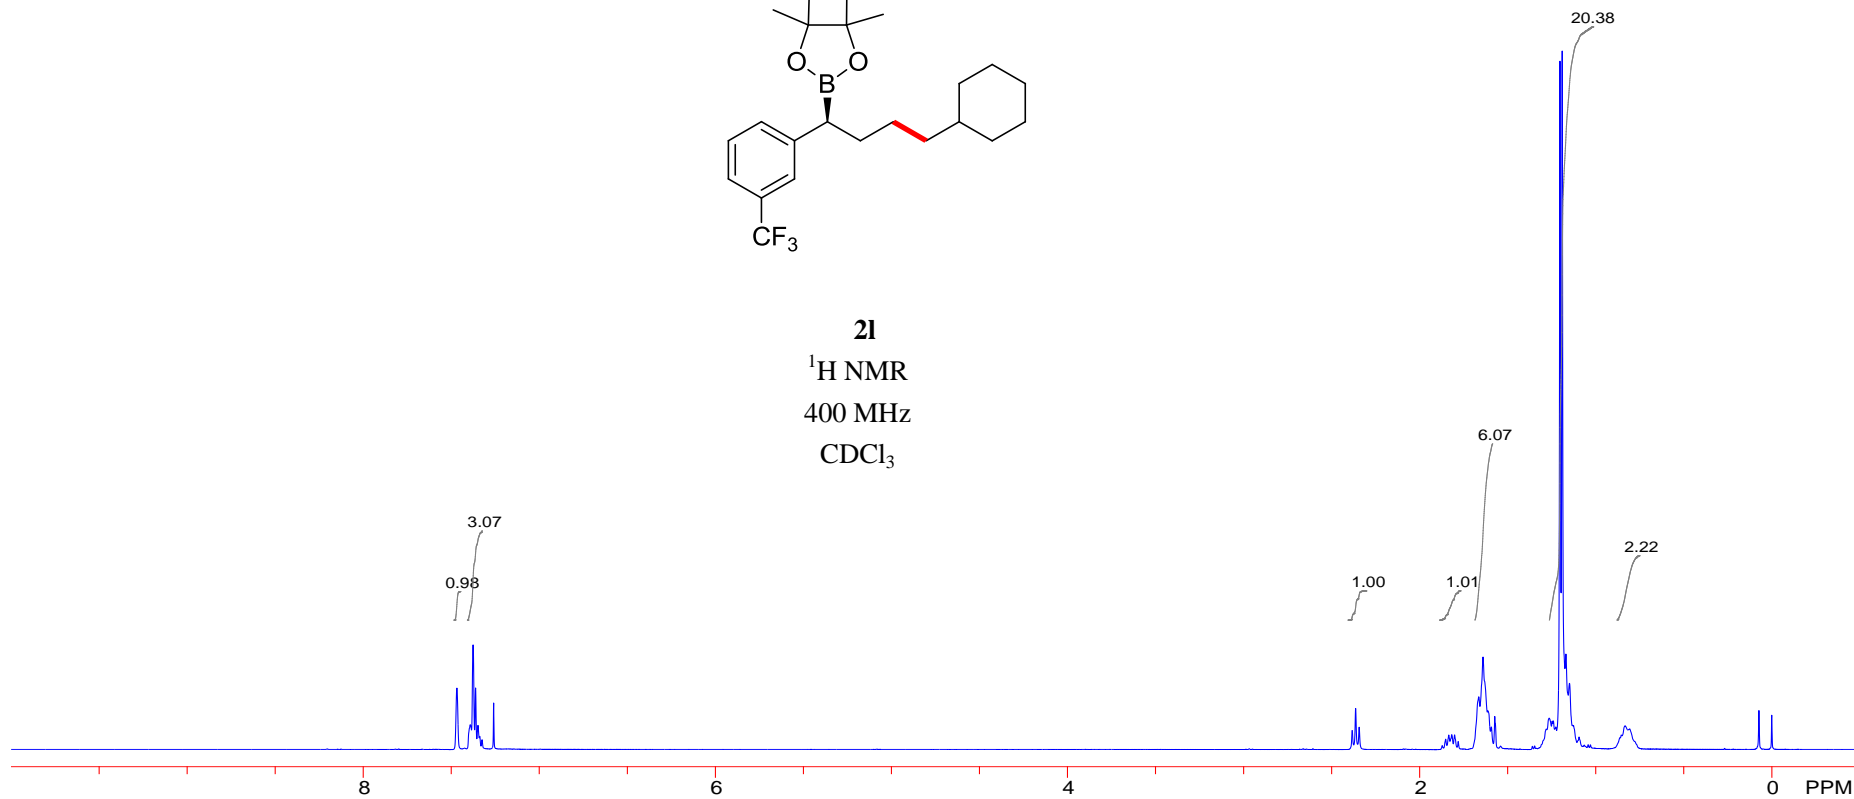

Supplementary Figure 149. <sup>1</sup>H NMR spectrum for **21**

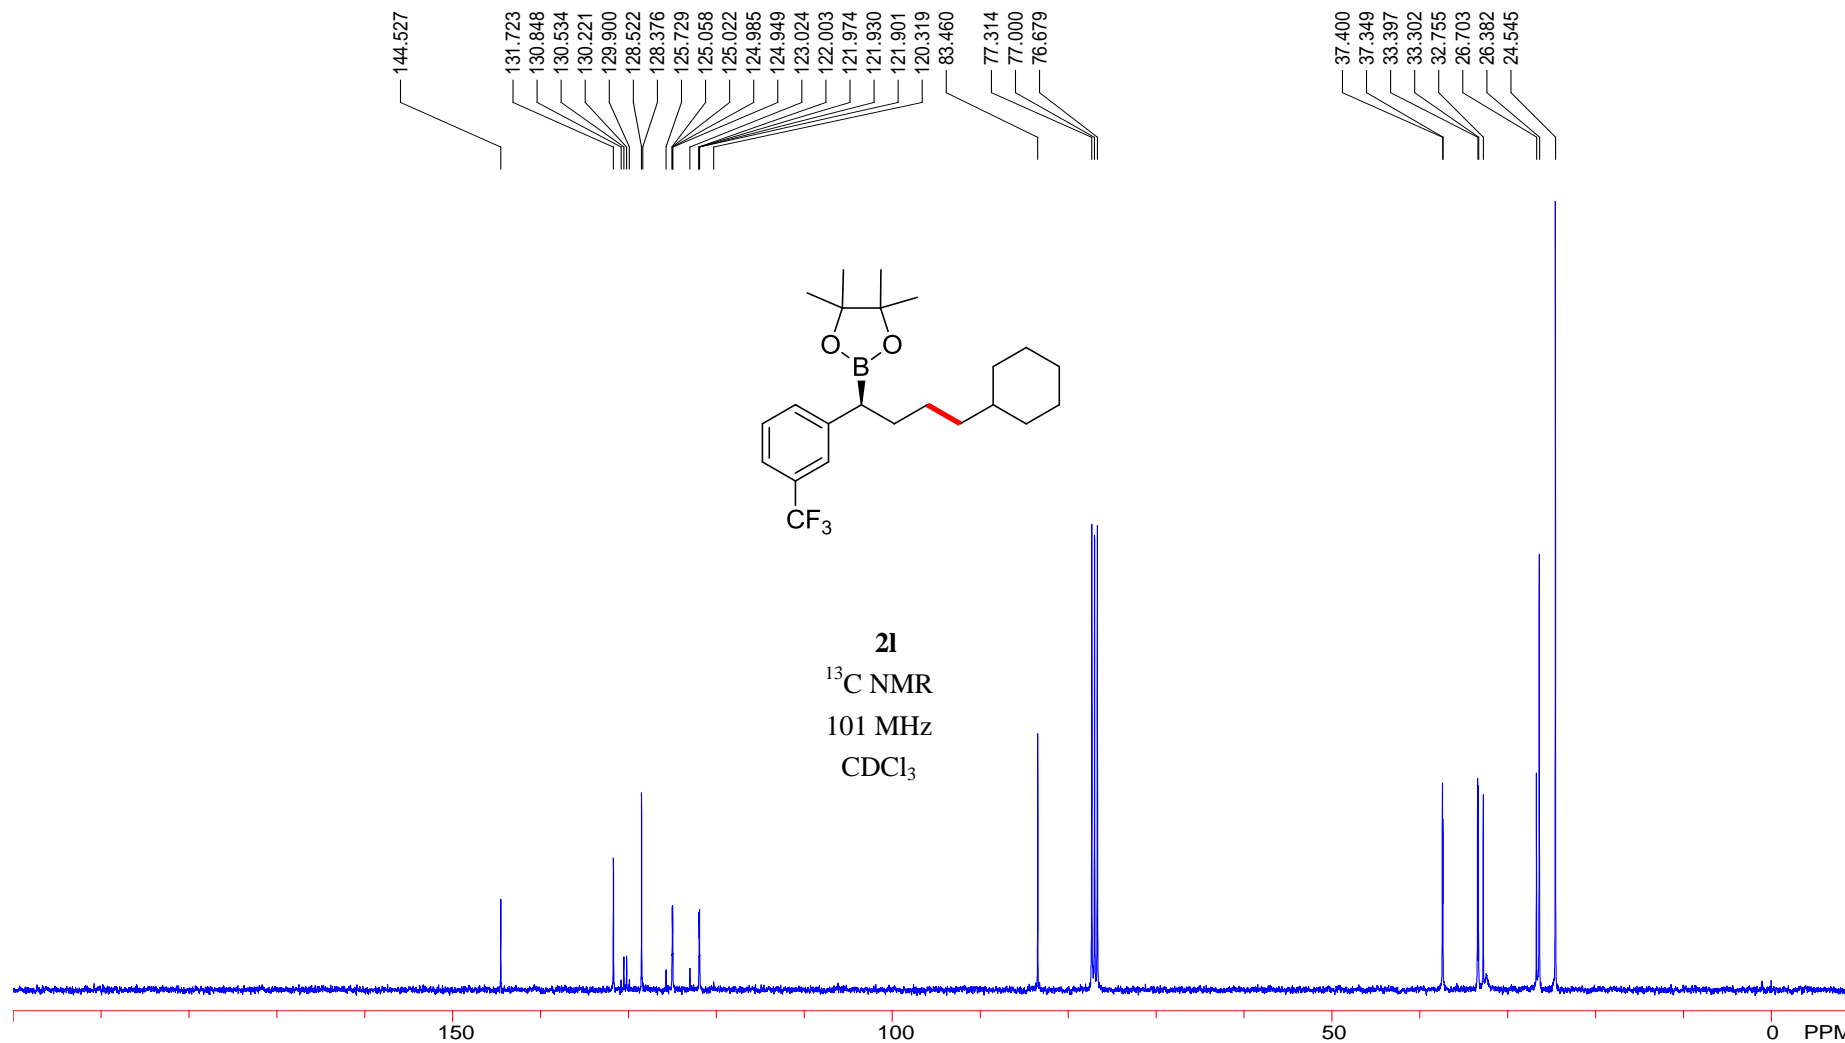

Supplementary Figure 150.  $^{13}\text{C}$  NMR spectrum for **21**

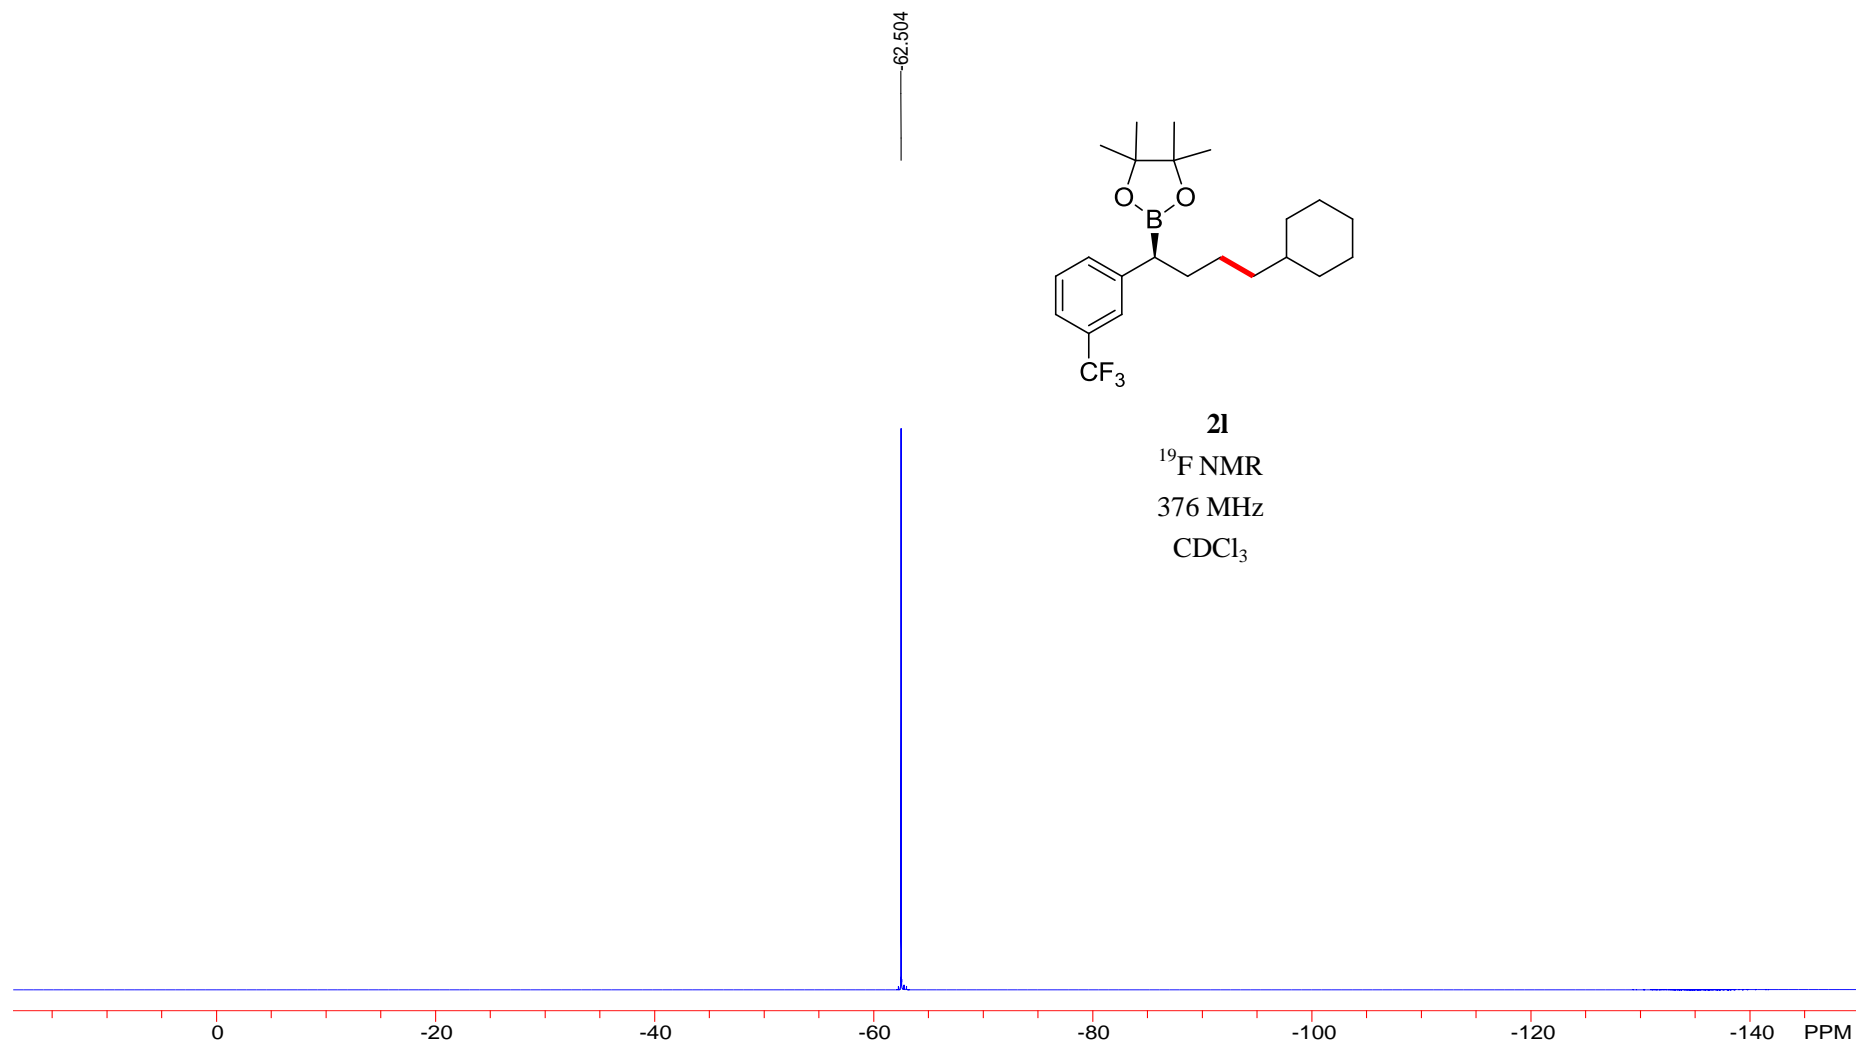

**Supplementary Figure 151.** <sup>19</sup>F NMR spectrum for **21**



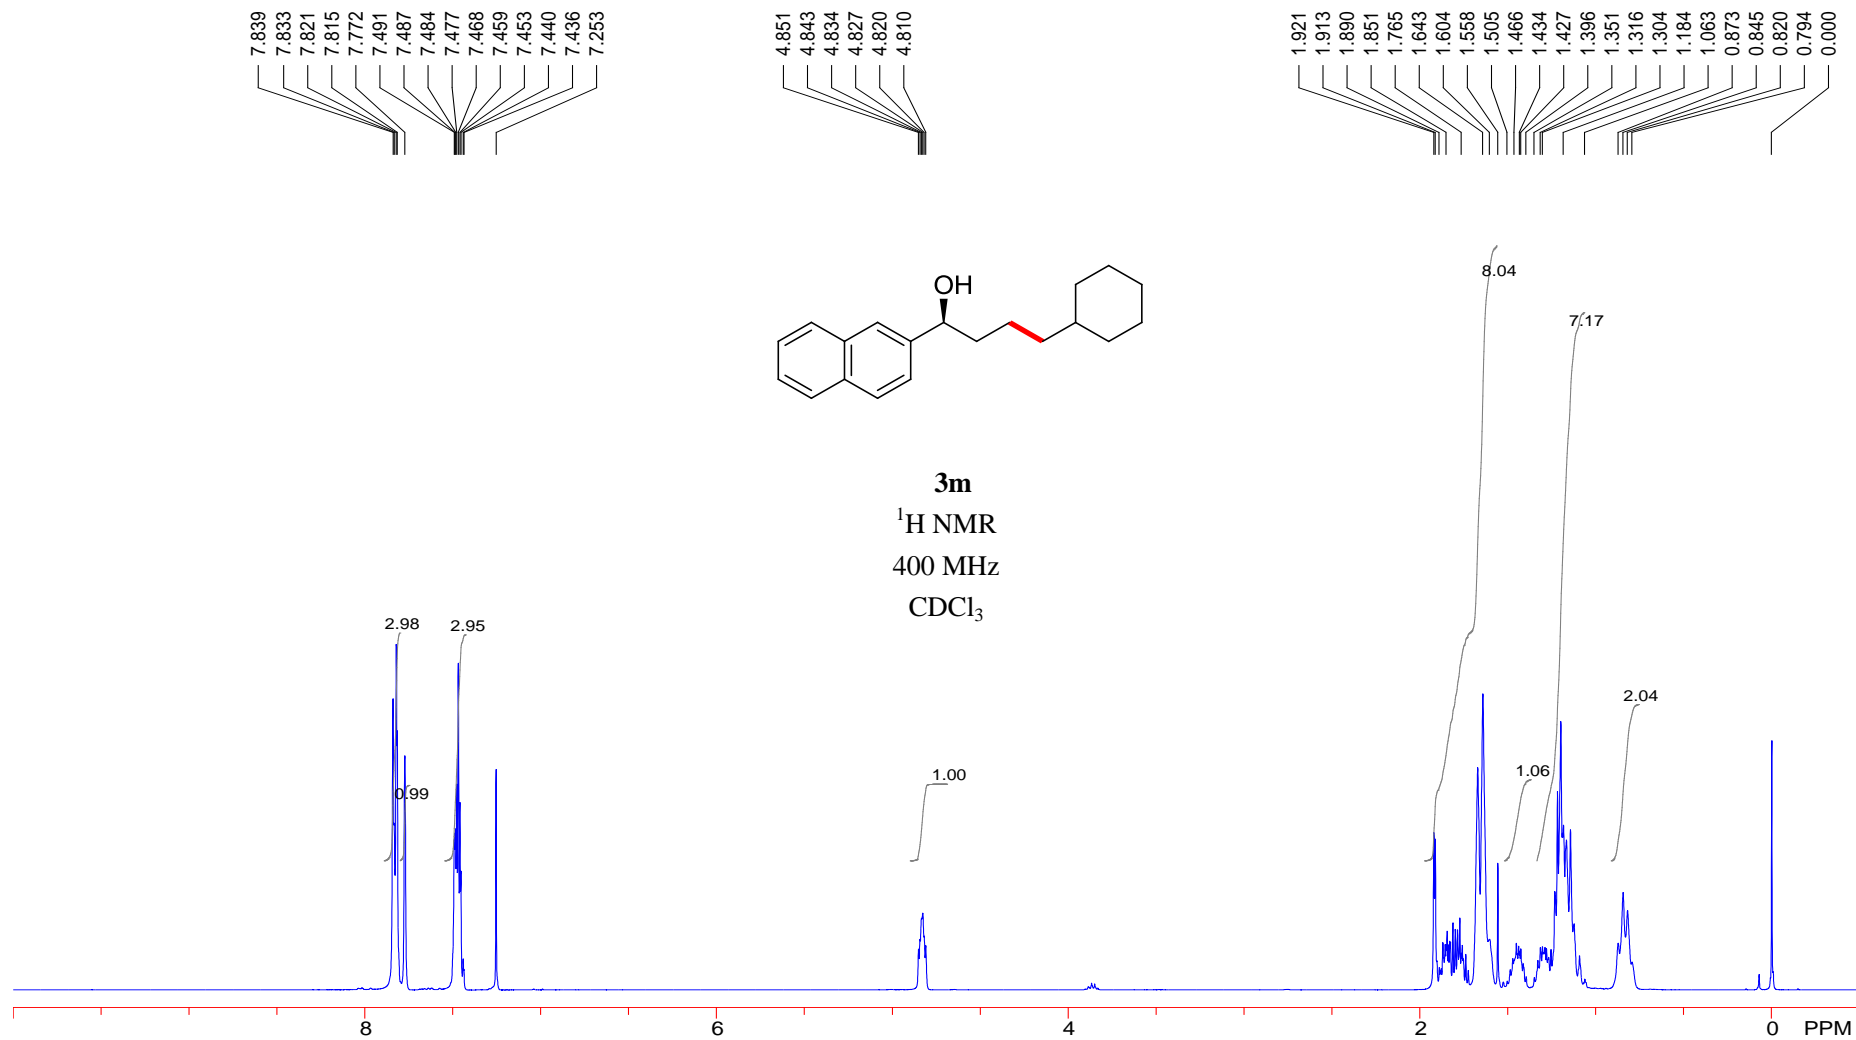

Supplementary Figure 152.  $^1\text{H NMR}$  spectrum for **3m**

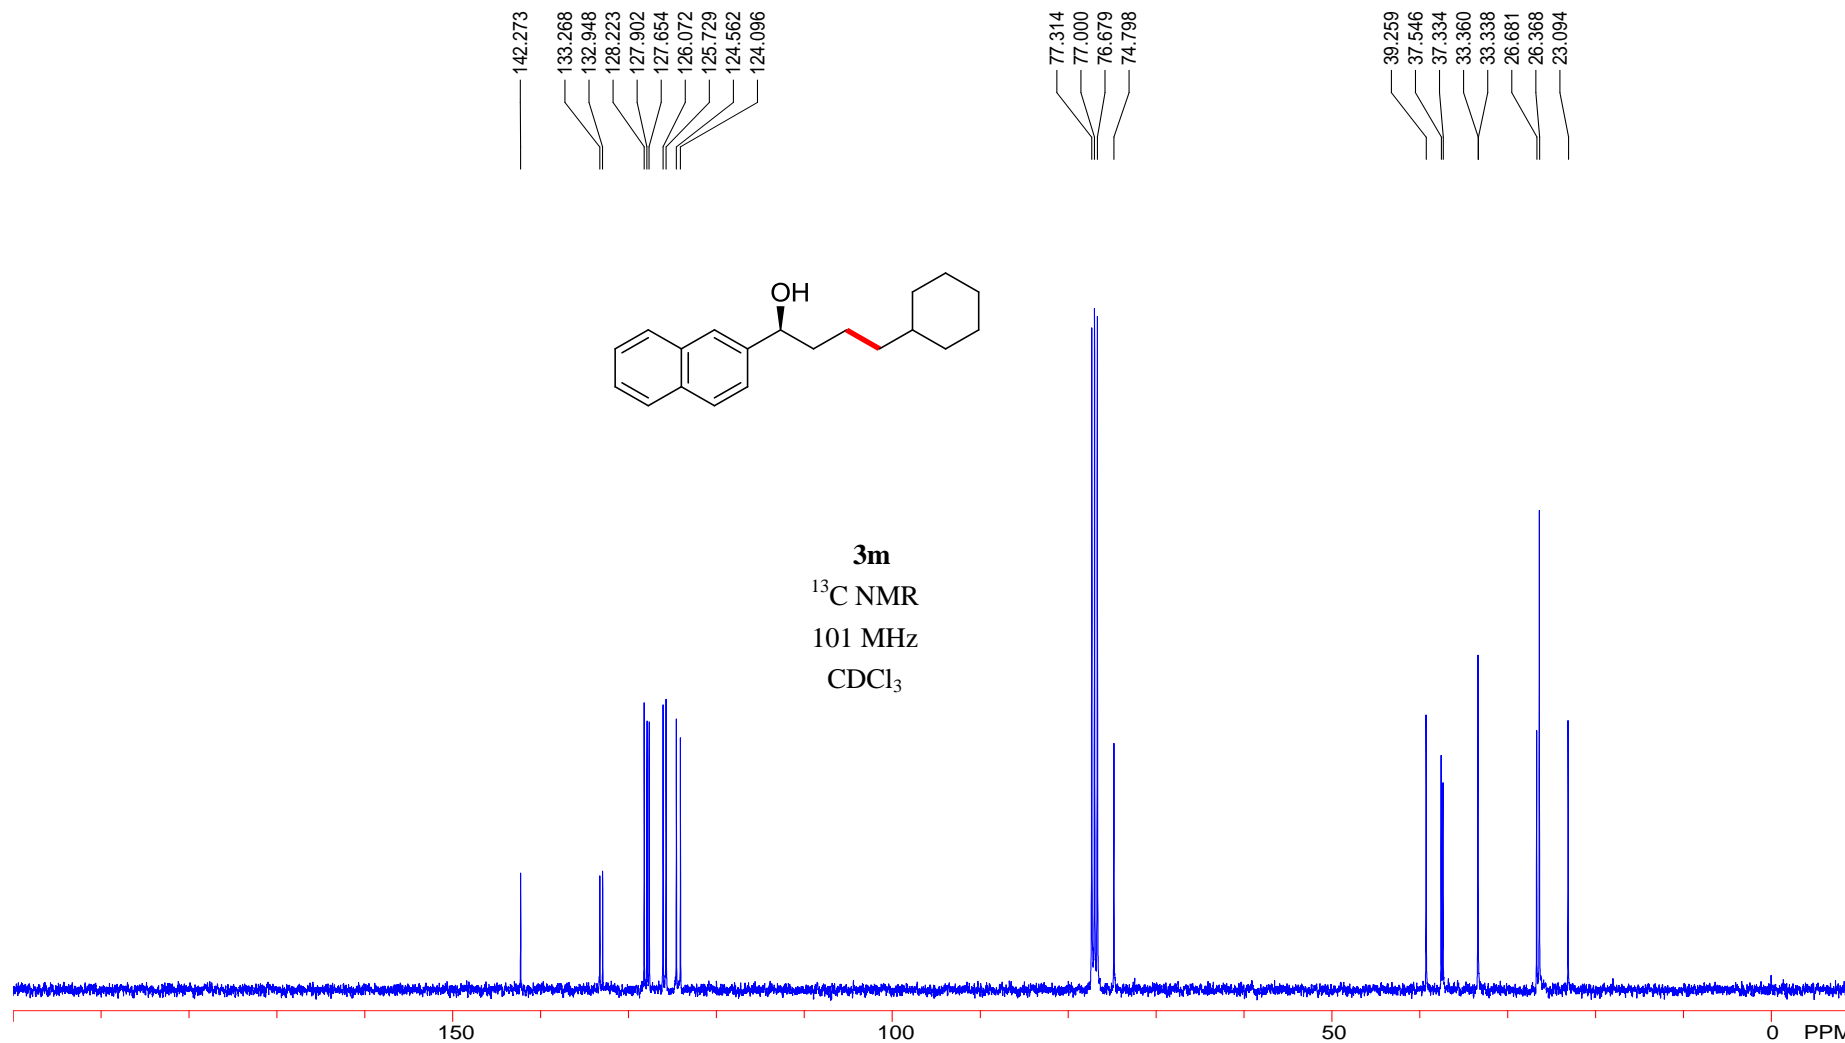

Supplementary Figure 153.  $^{13}\text{C}$  NMR spectrum for **3m**

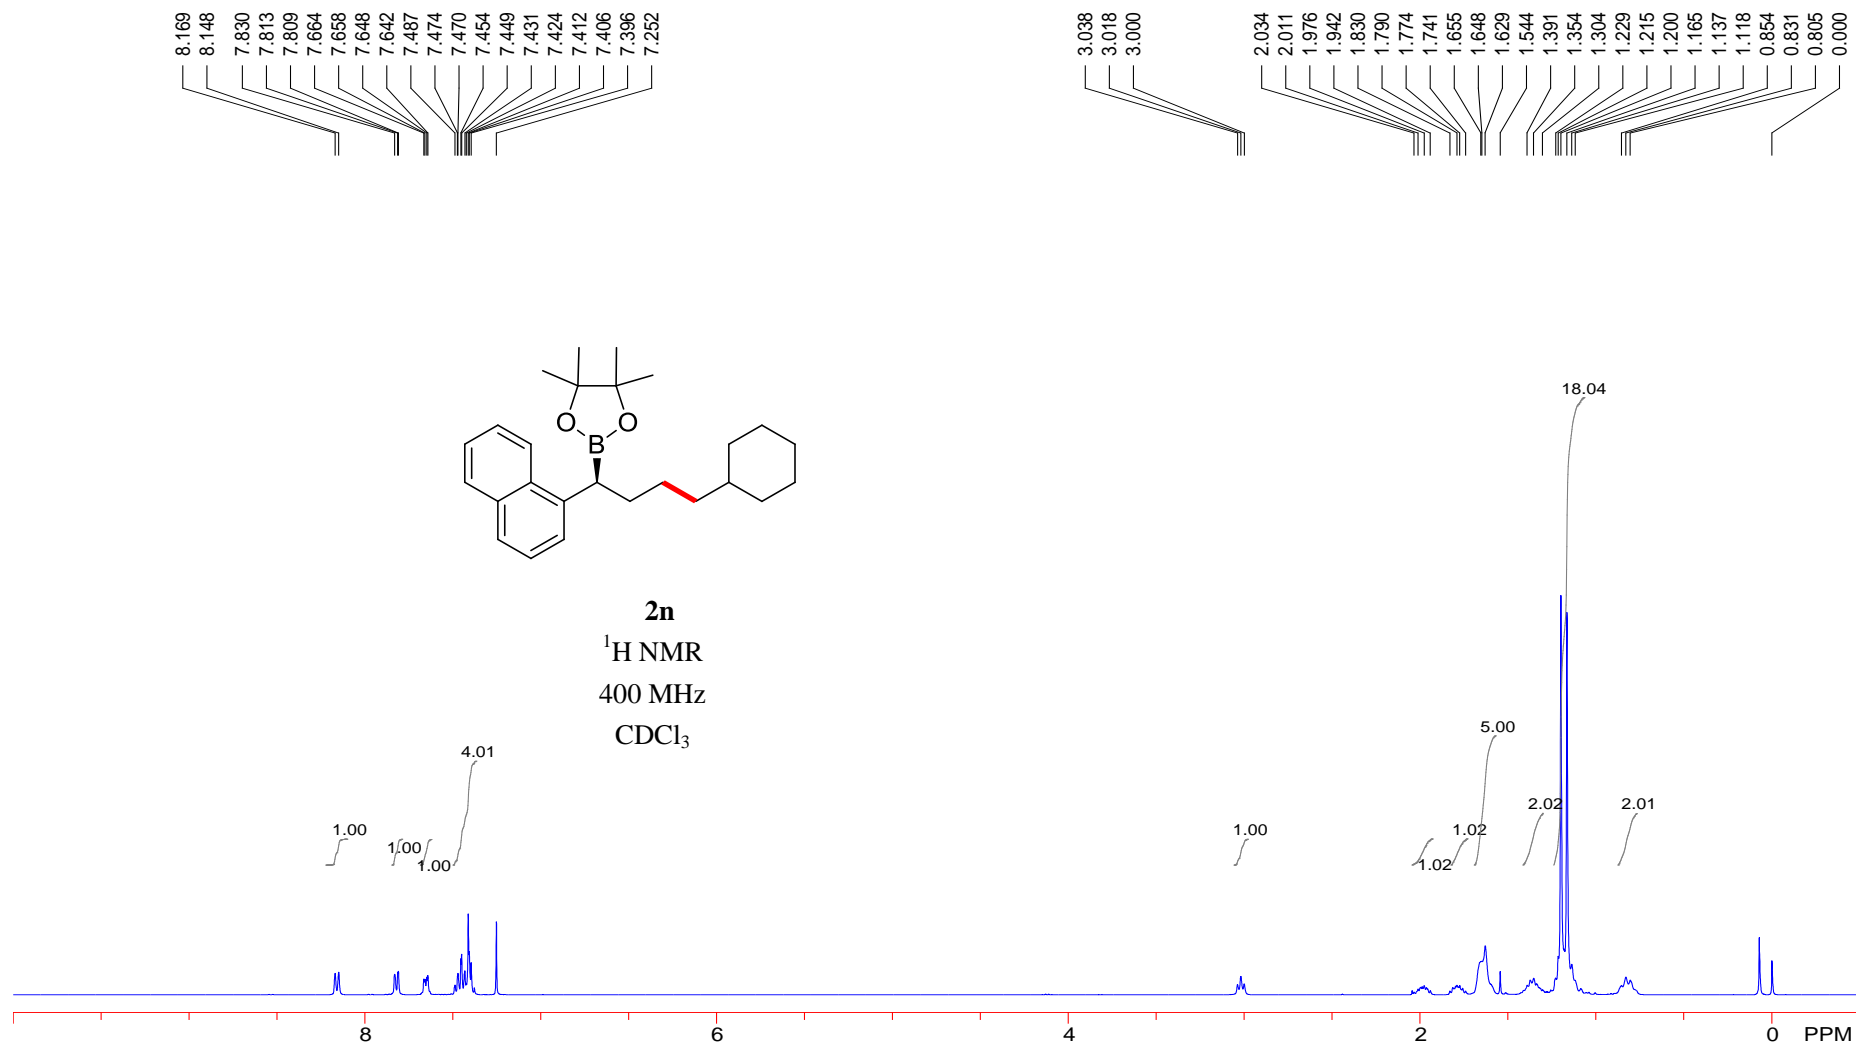

Supplementary Figure 154. <sup>1</sup>H NMR spectrum for **2n**

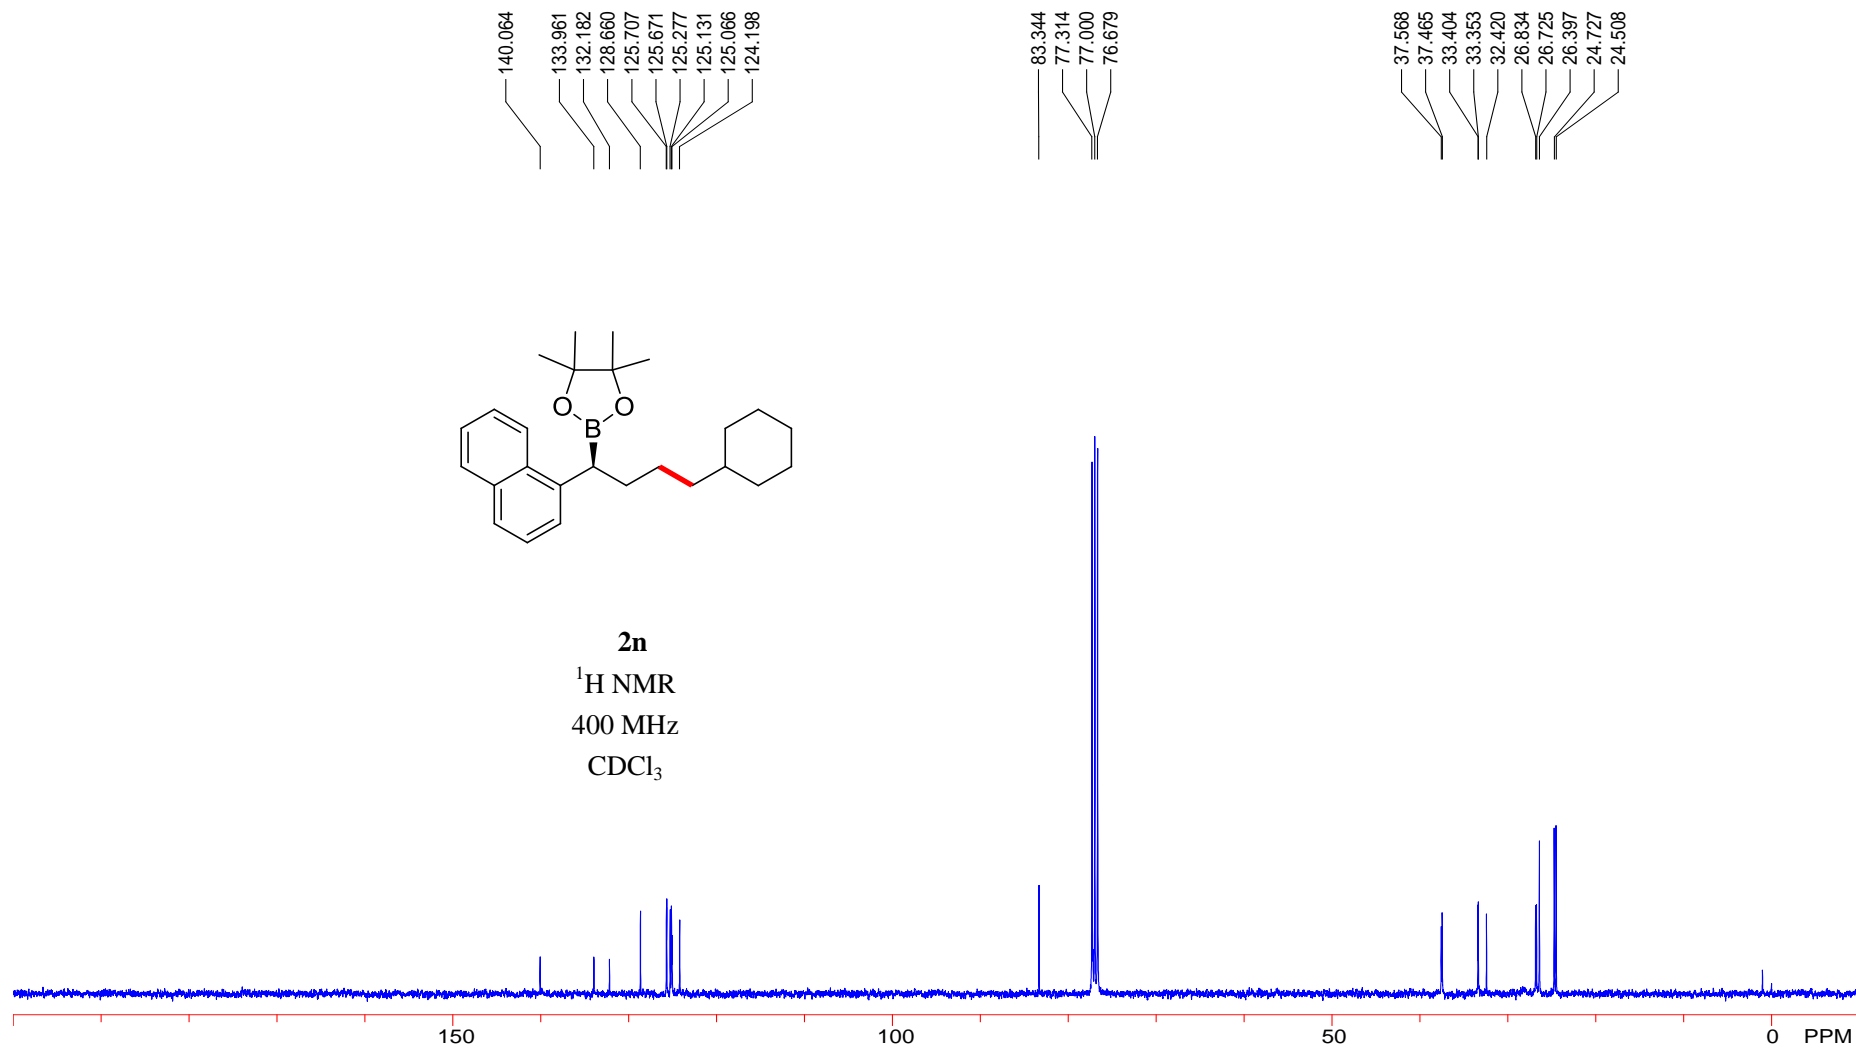

Supplementary Figure 155.  $^{13}\text{C}$  NMR spectrum for **2n**

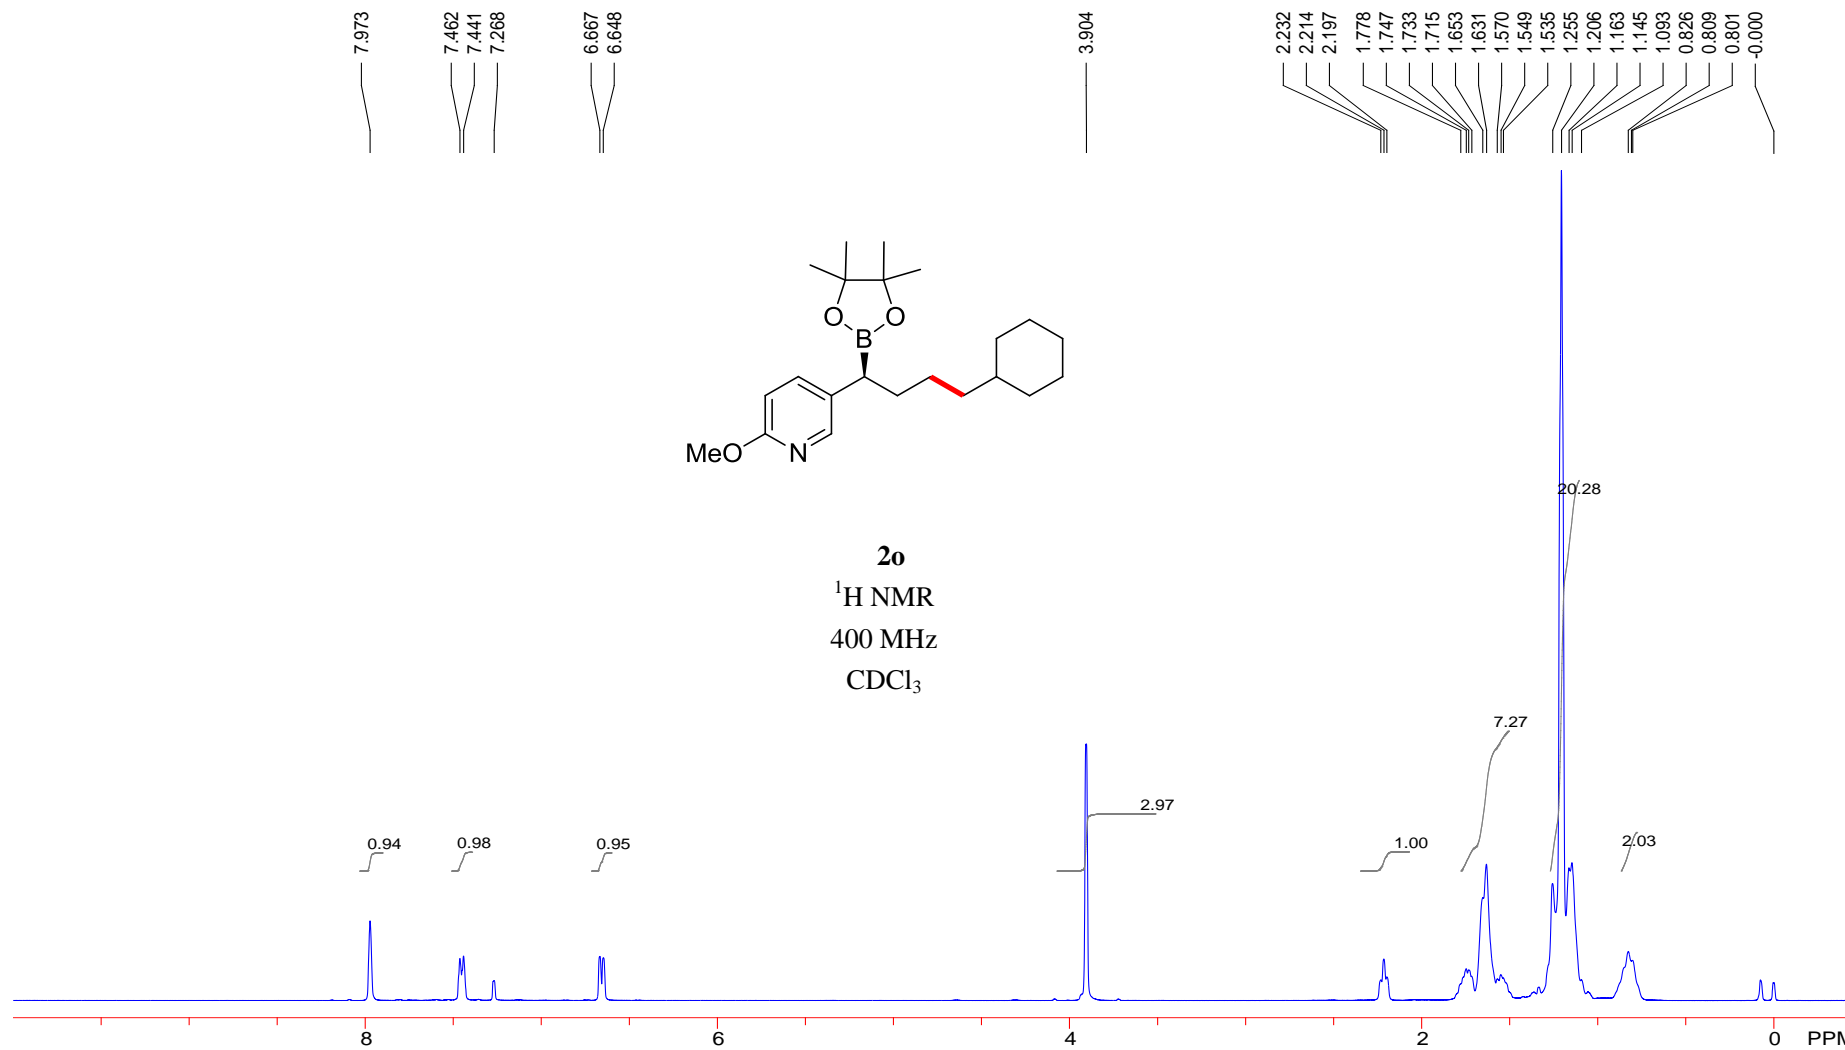

Supplementary Figure 156.  $^1\text{H}$  NMR spectrum for **2o**

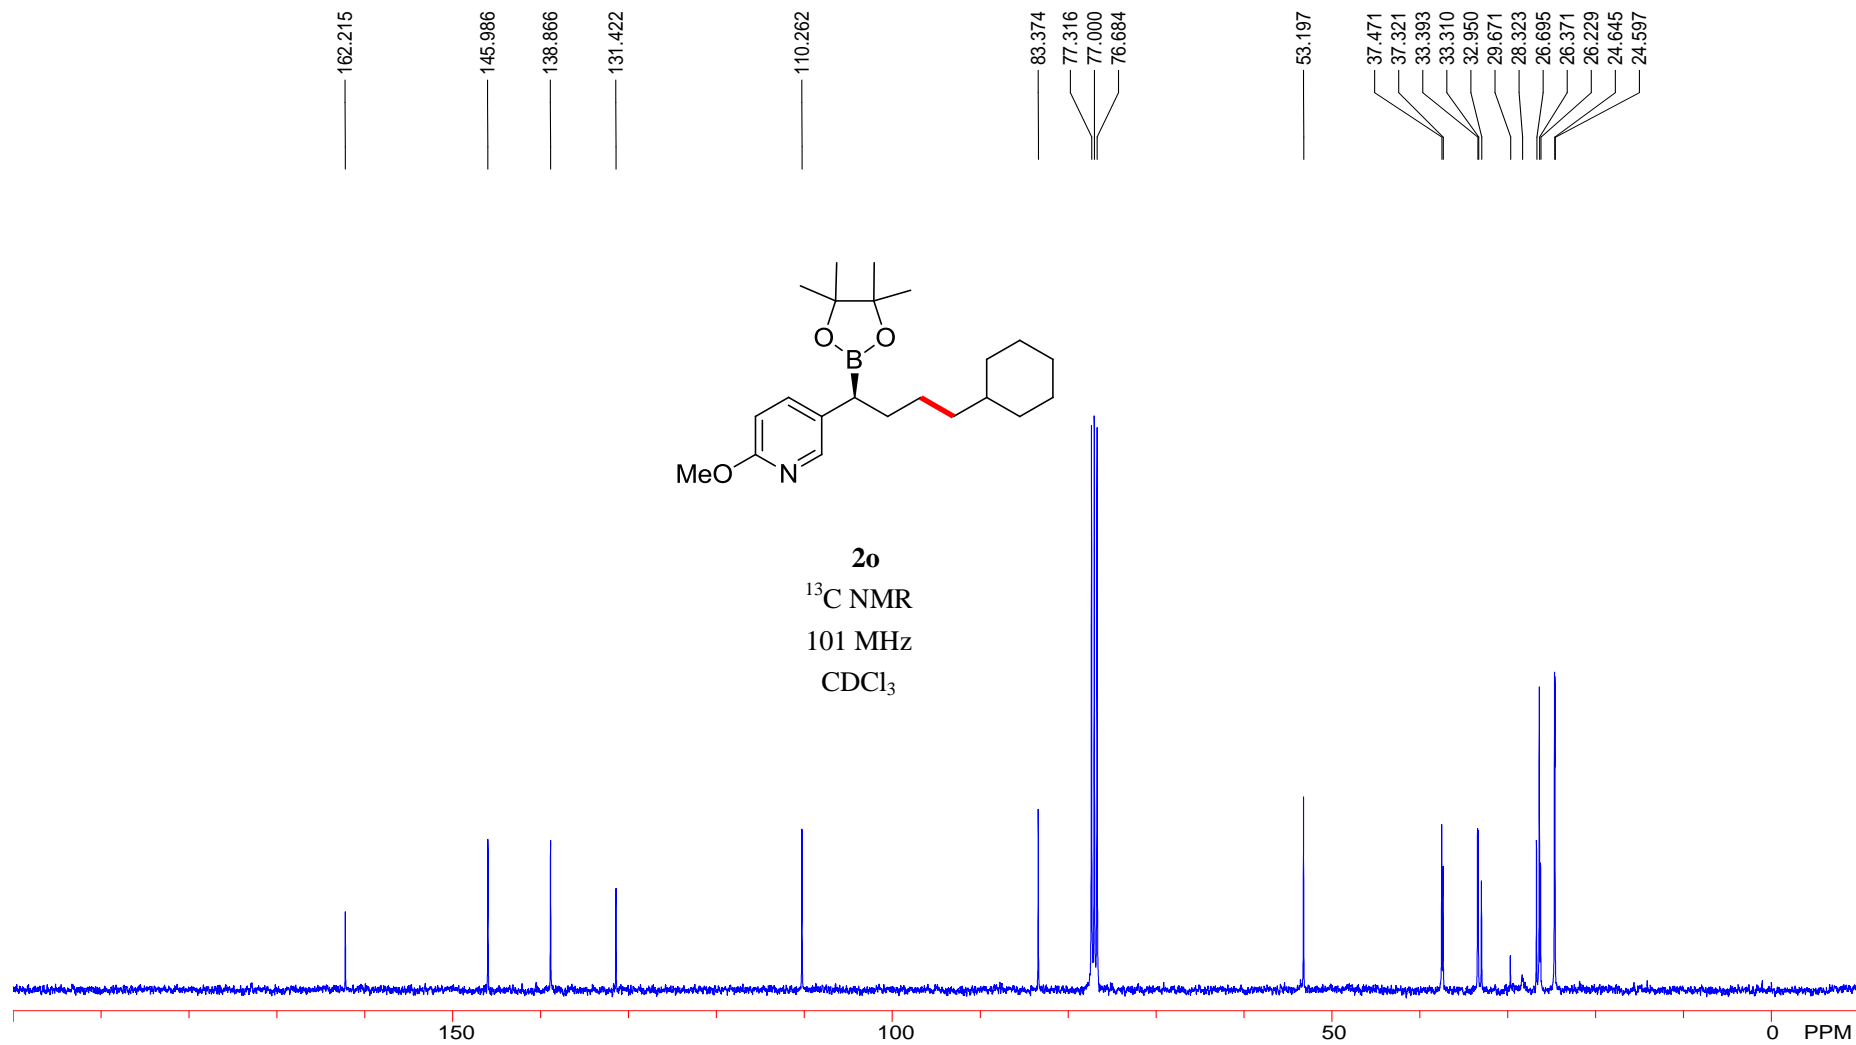

Supplementary Figure 157. <sup>13</sup>C NMR spectrum for **2o**

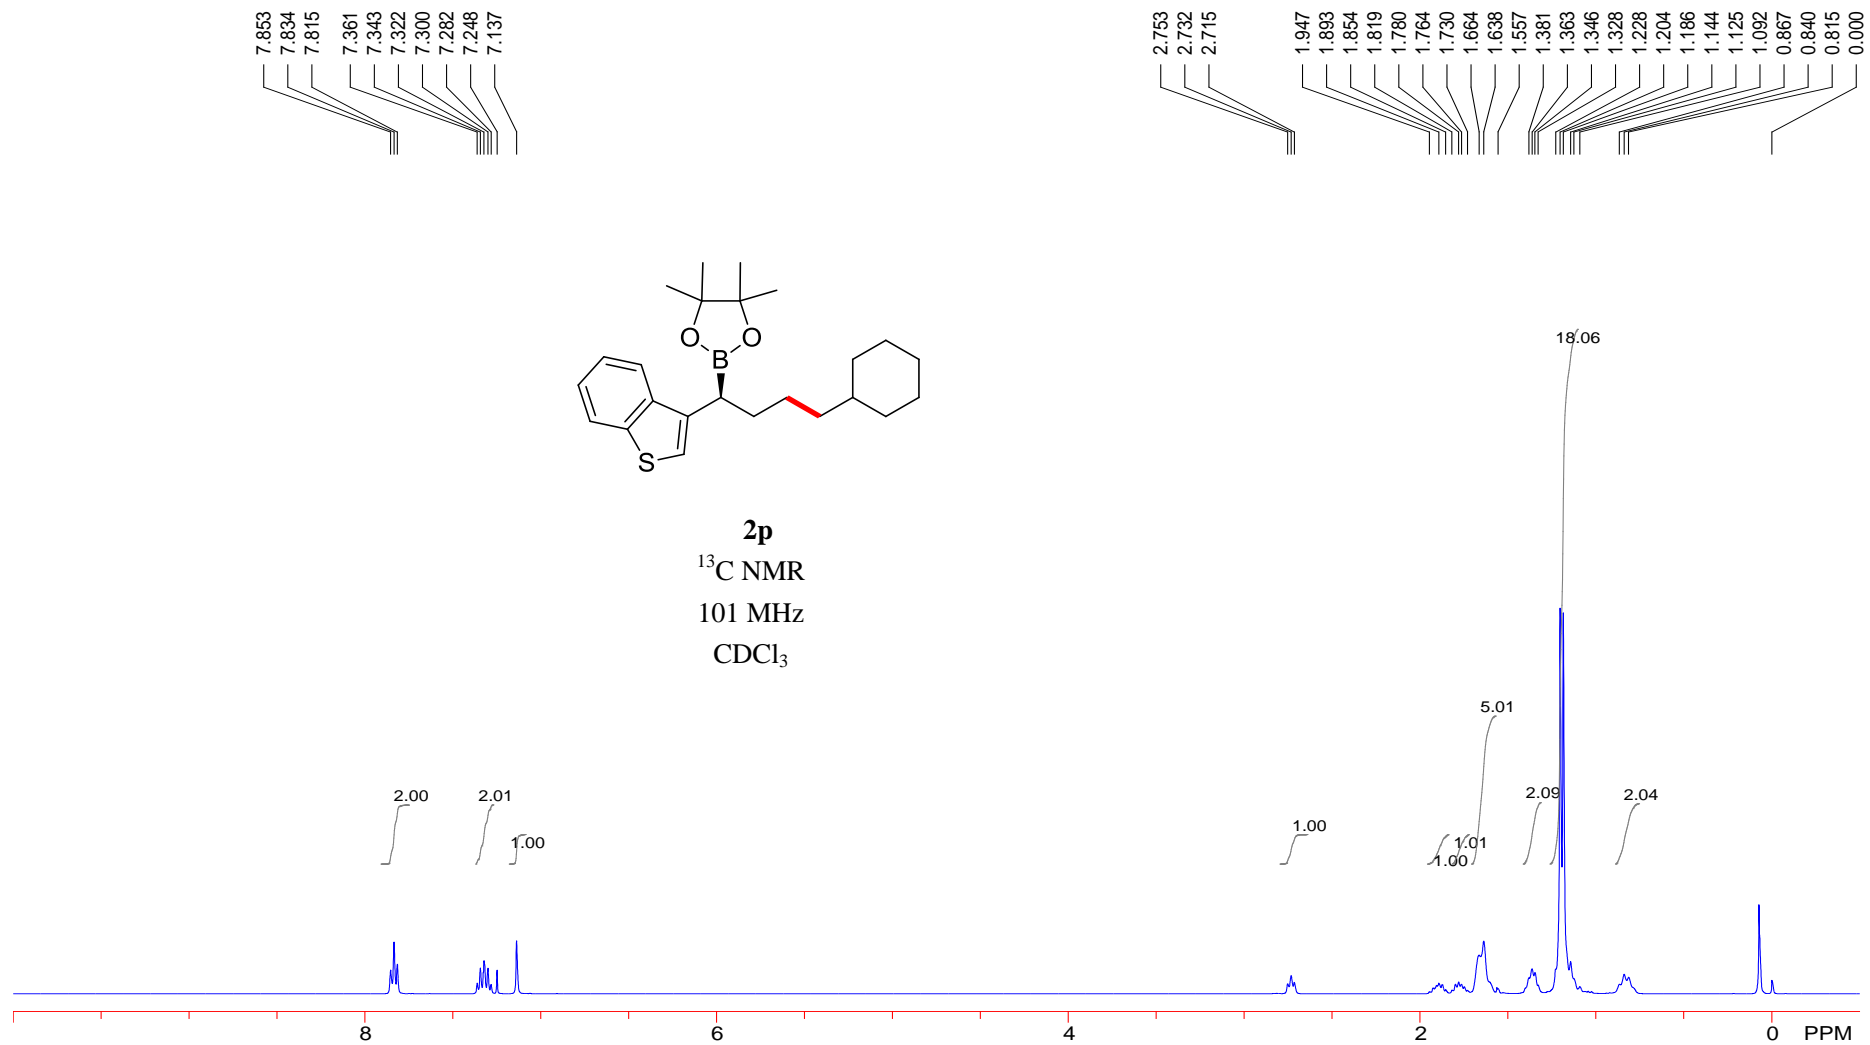

Supplementary Figure 158. <sup>1</sup>H NMR spectrum for **2p**

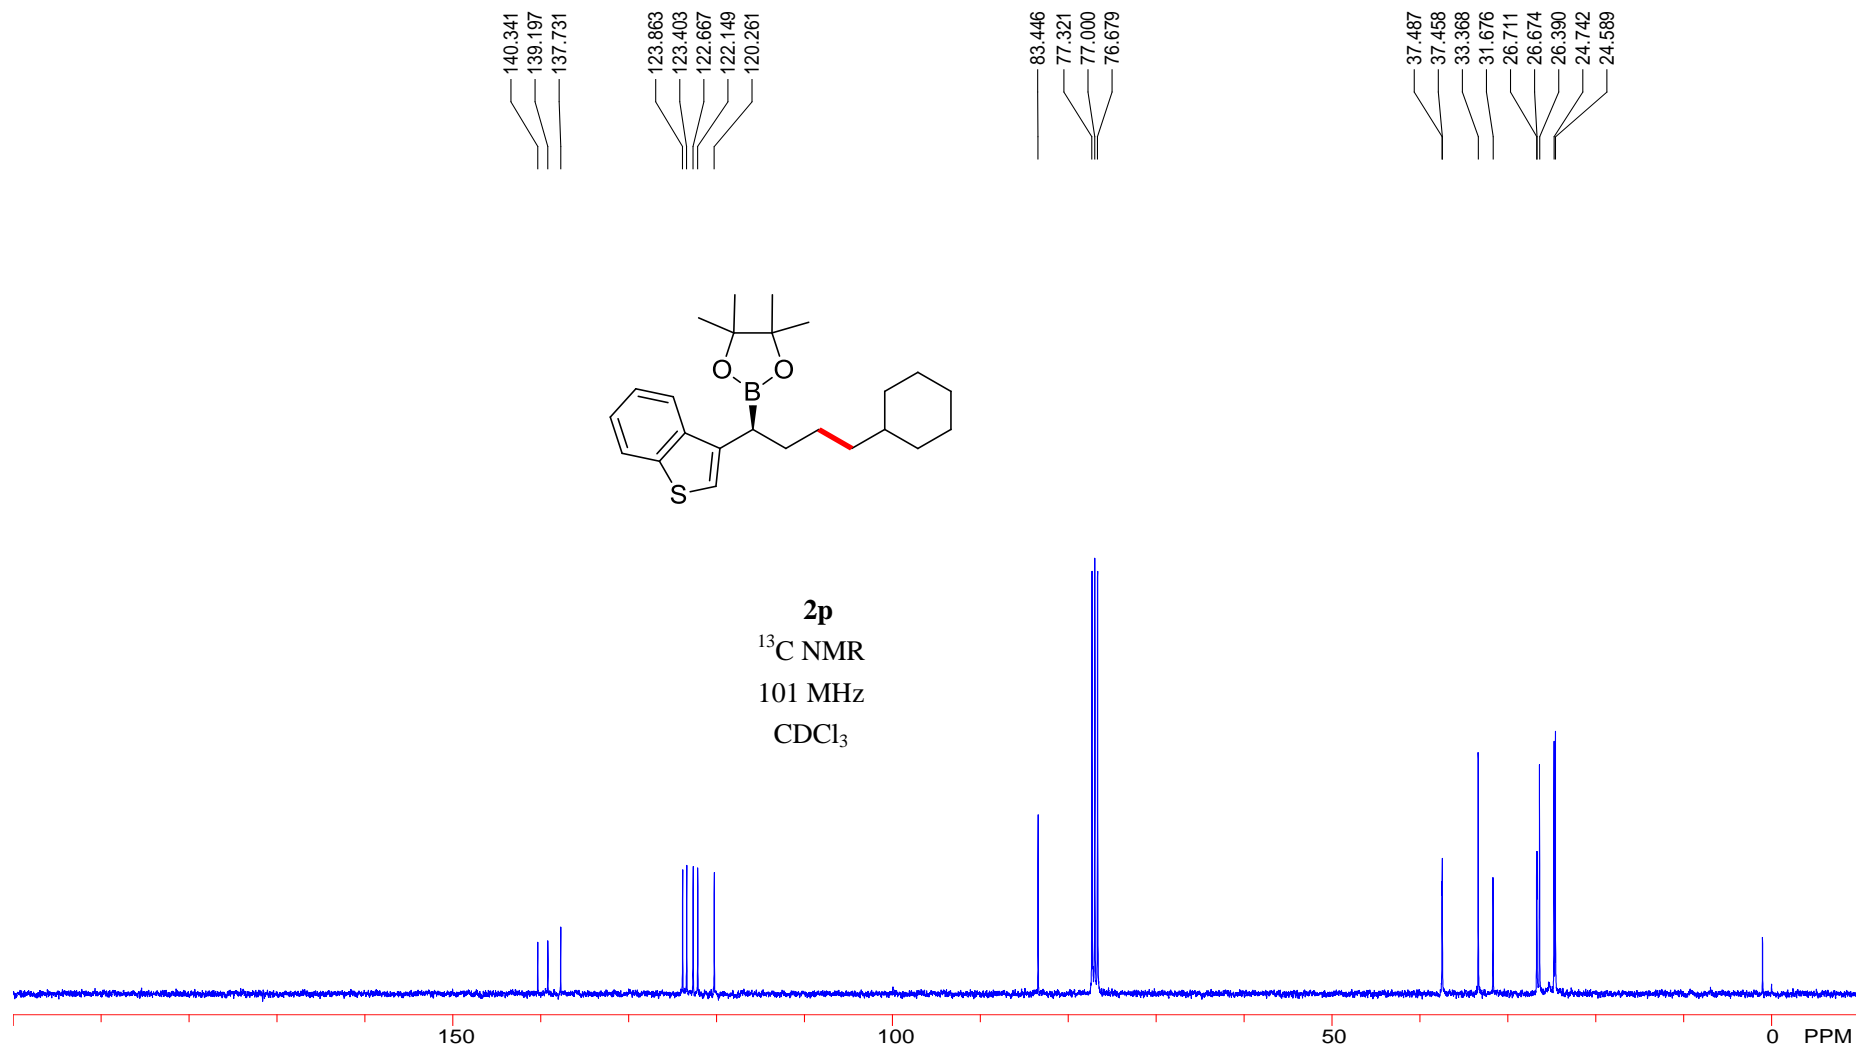

Supplementary Figure 159. <sup>13</sup>C NMR spectrum for **2p**



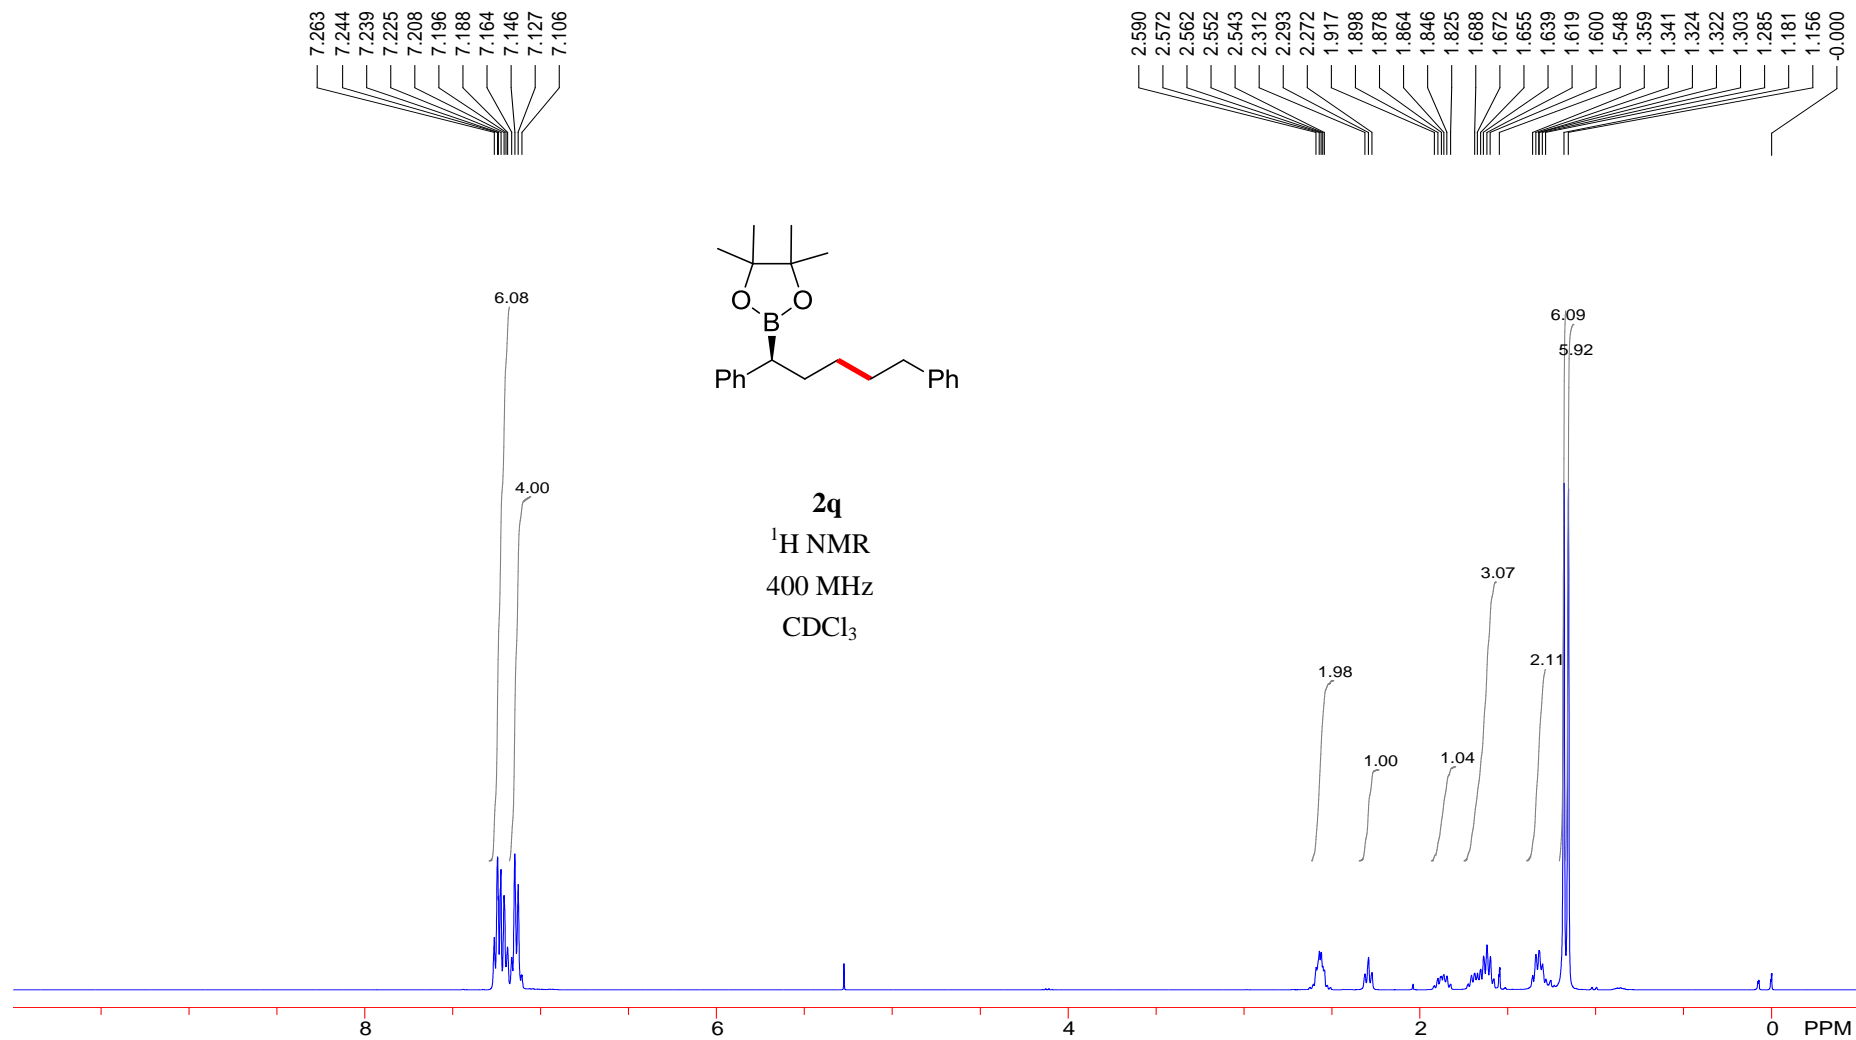

Supplementary Figure 160.  $^1\text{H}$  NMR spectrum for **2q**

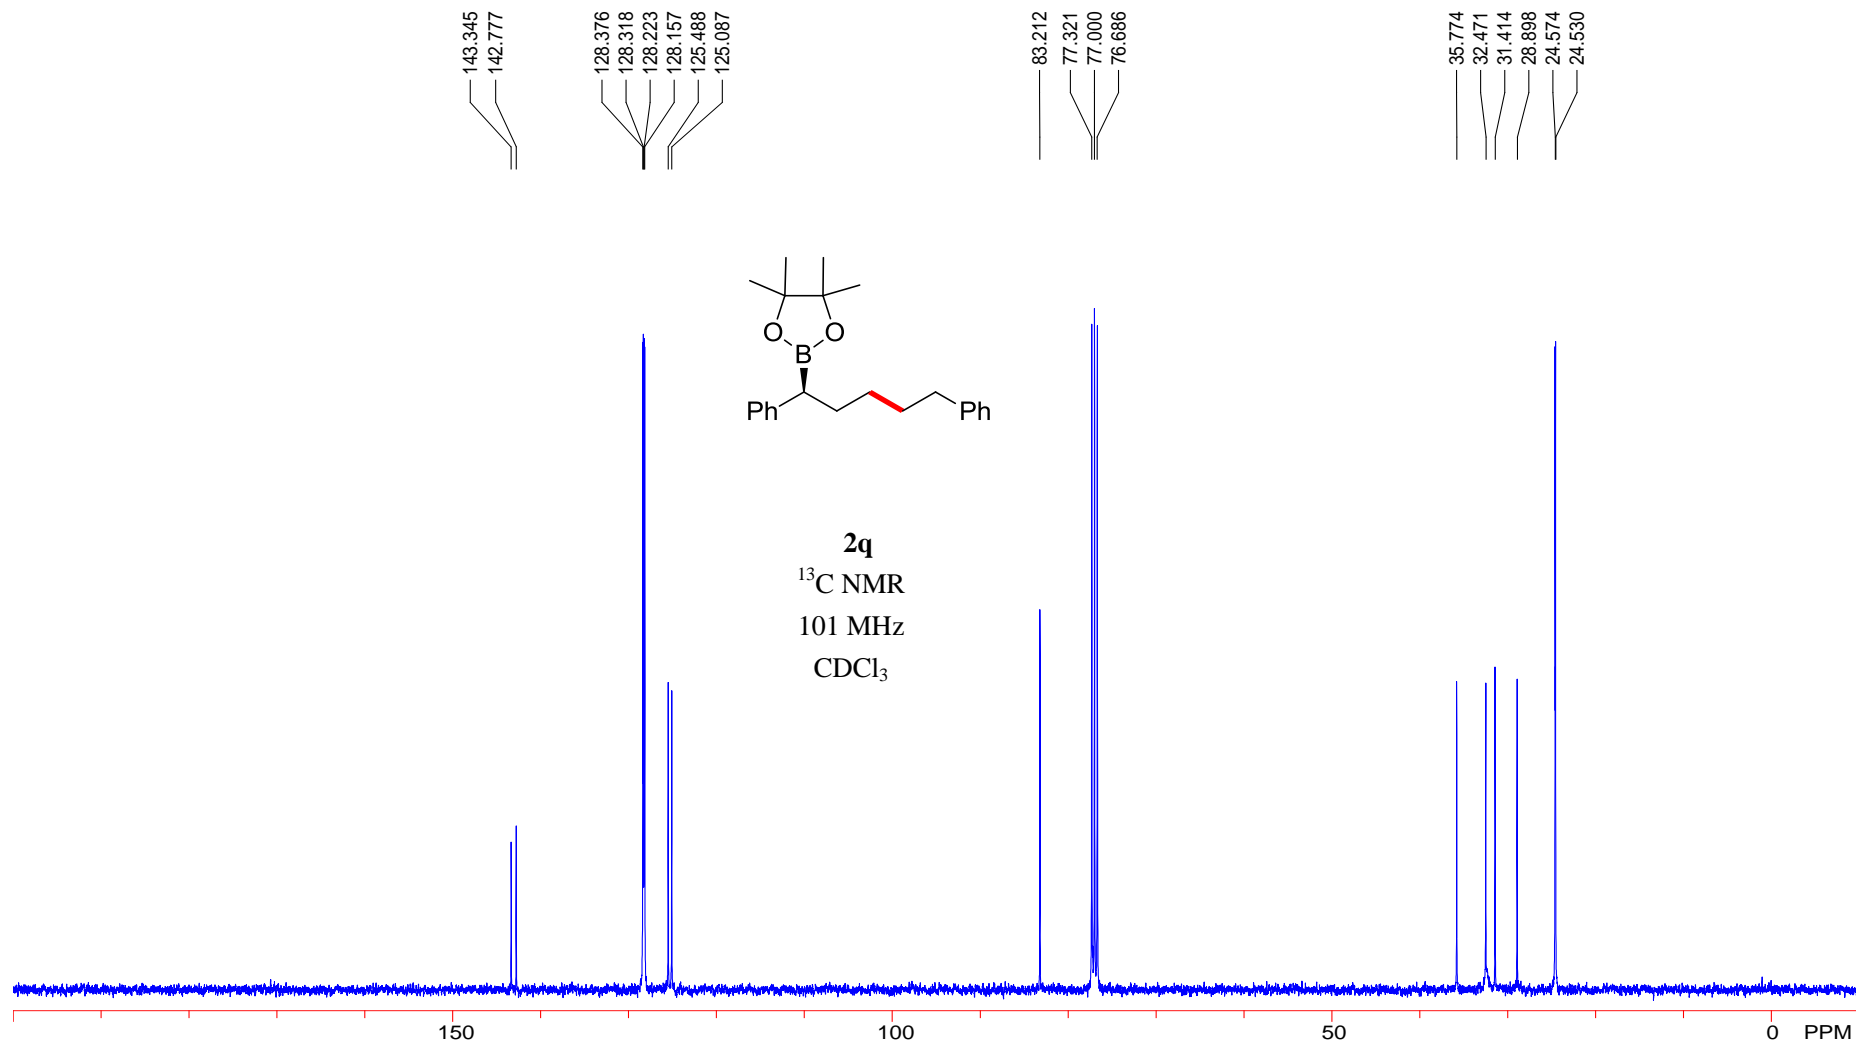

Supplementary Figure 161. <sup>13</sup>C NMR spectrum for **2q**

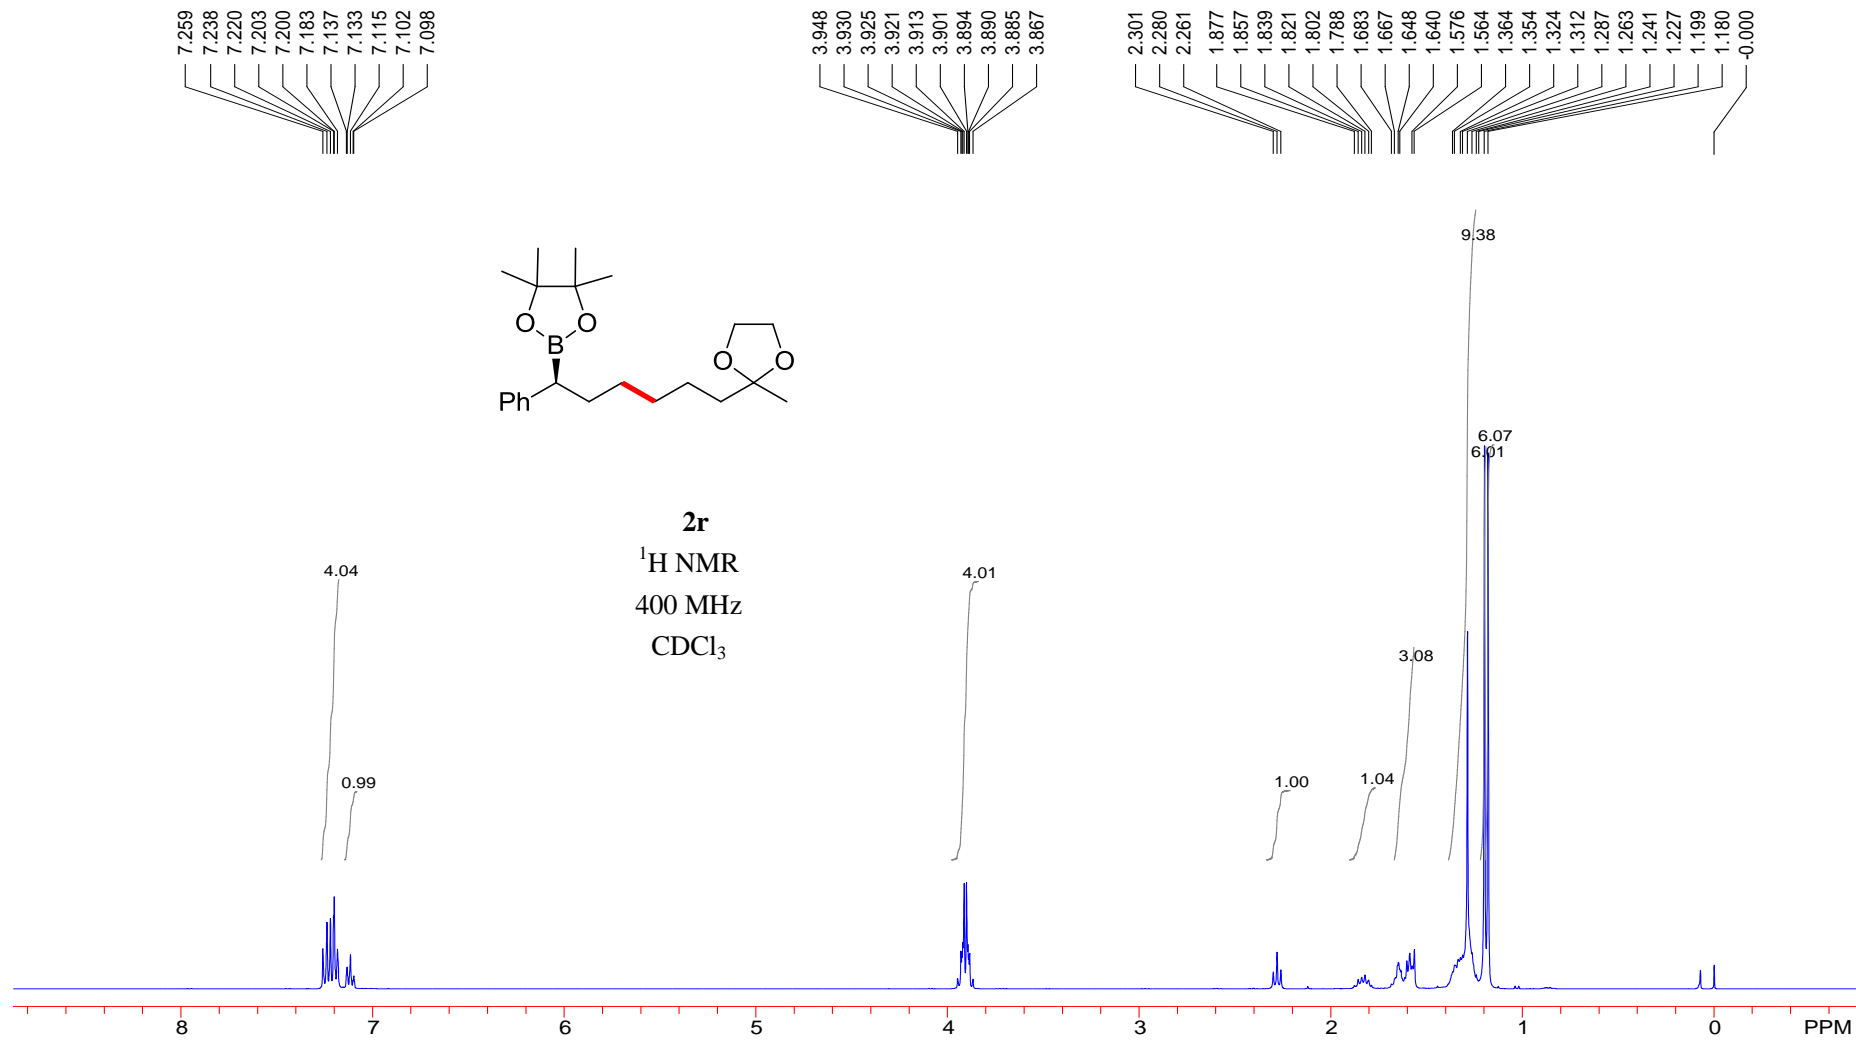

Supplementary Figure 162.  $^1\text{H}$  NMR spectrum for **2r**

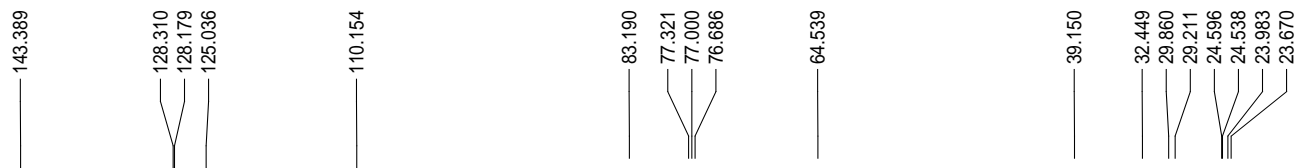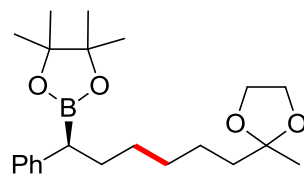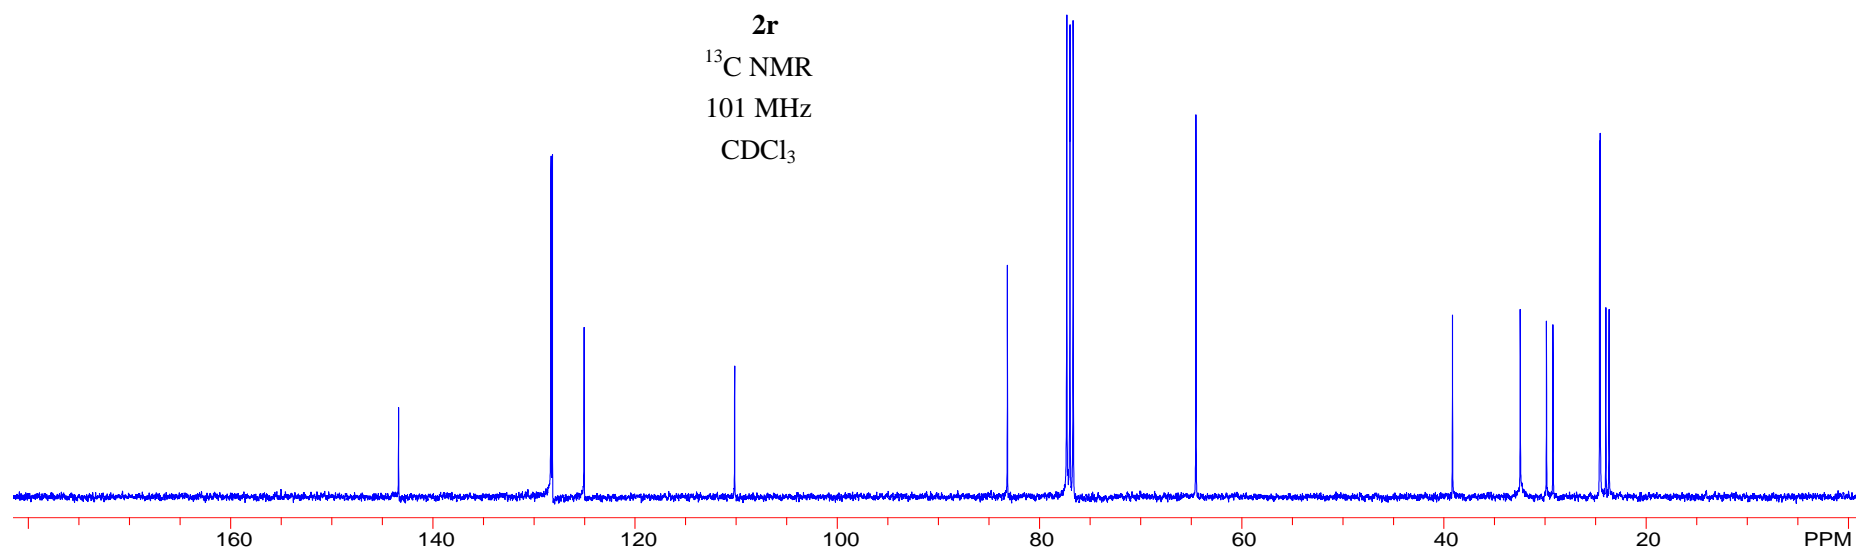

Supplementary Figure 163. <sup>13</sup>C NMR spectrum for **2r**

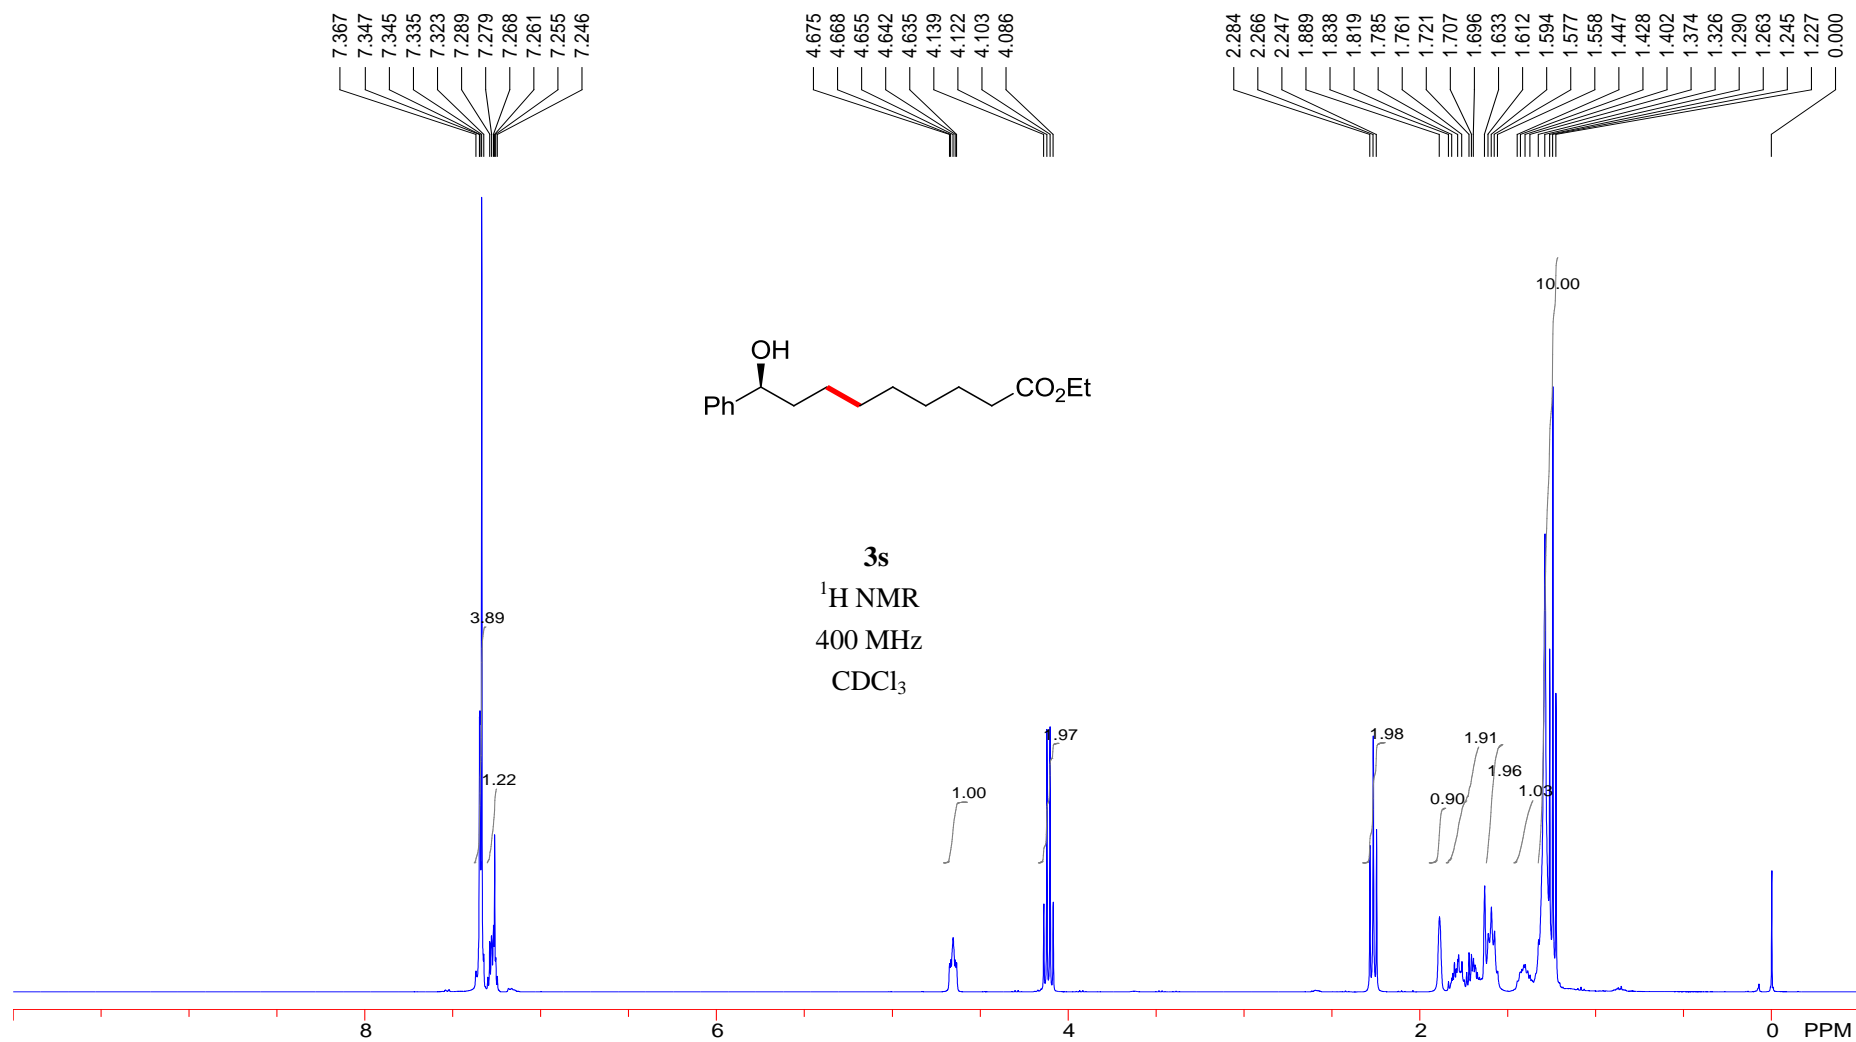

Supplementary Figure 164. <sup>1</sup>H NMR spectrum for **3s**

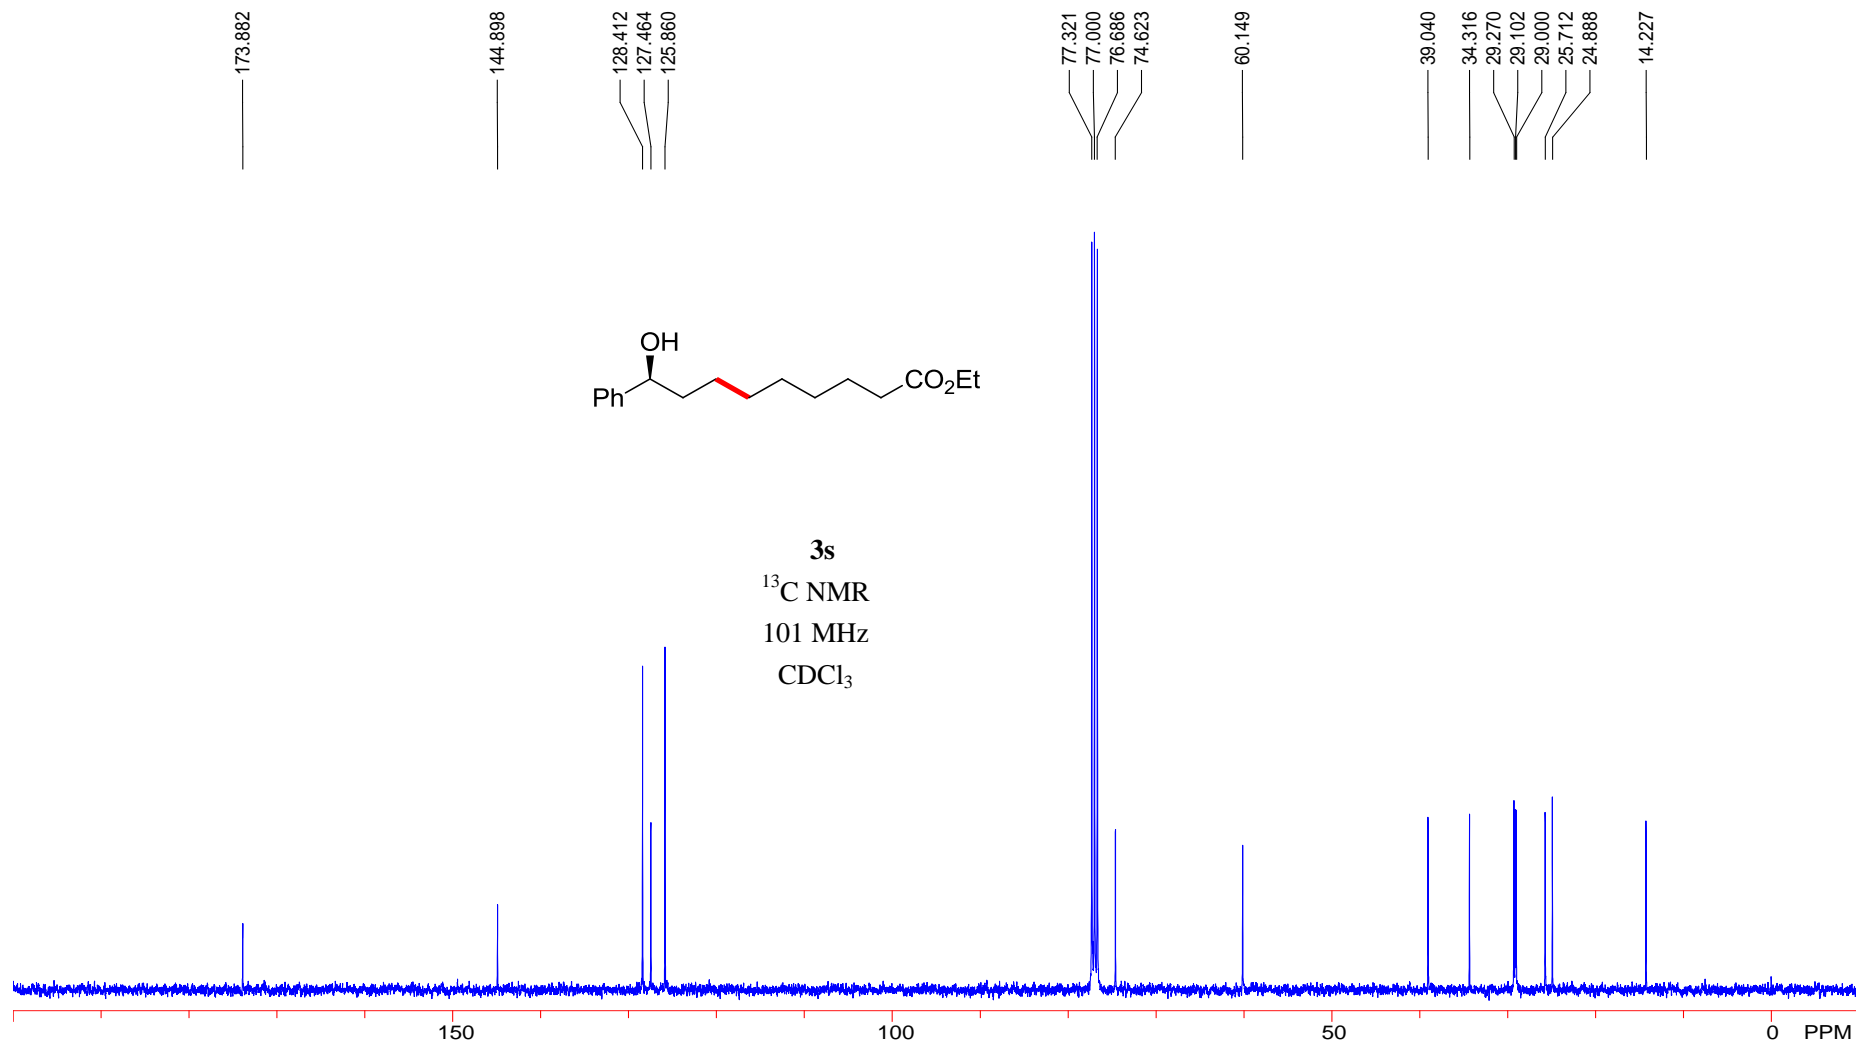

Supplementary Figure 165. <sup>13</sup>C NMR spectrum for **3s**

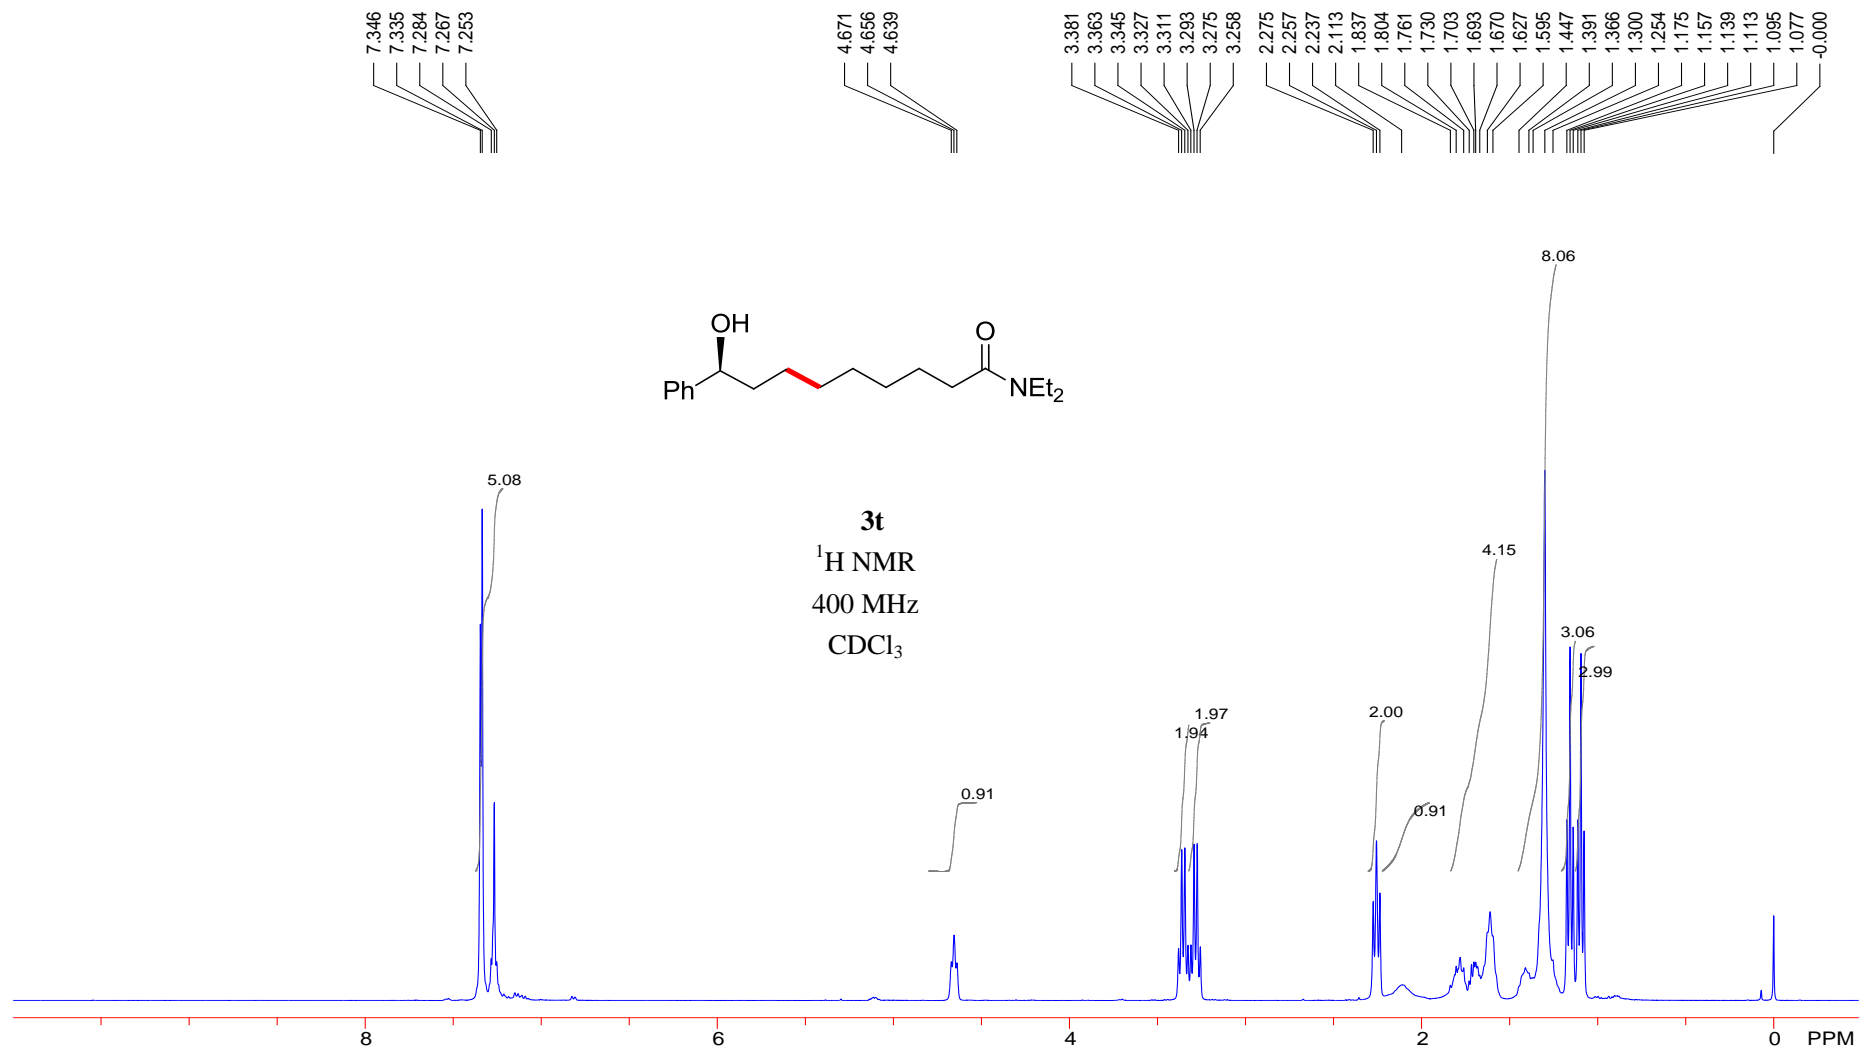

Supplementary Figure 166. <sup>1</sup>H NMR spectrum for **3t**

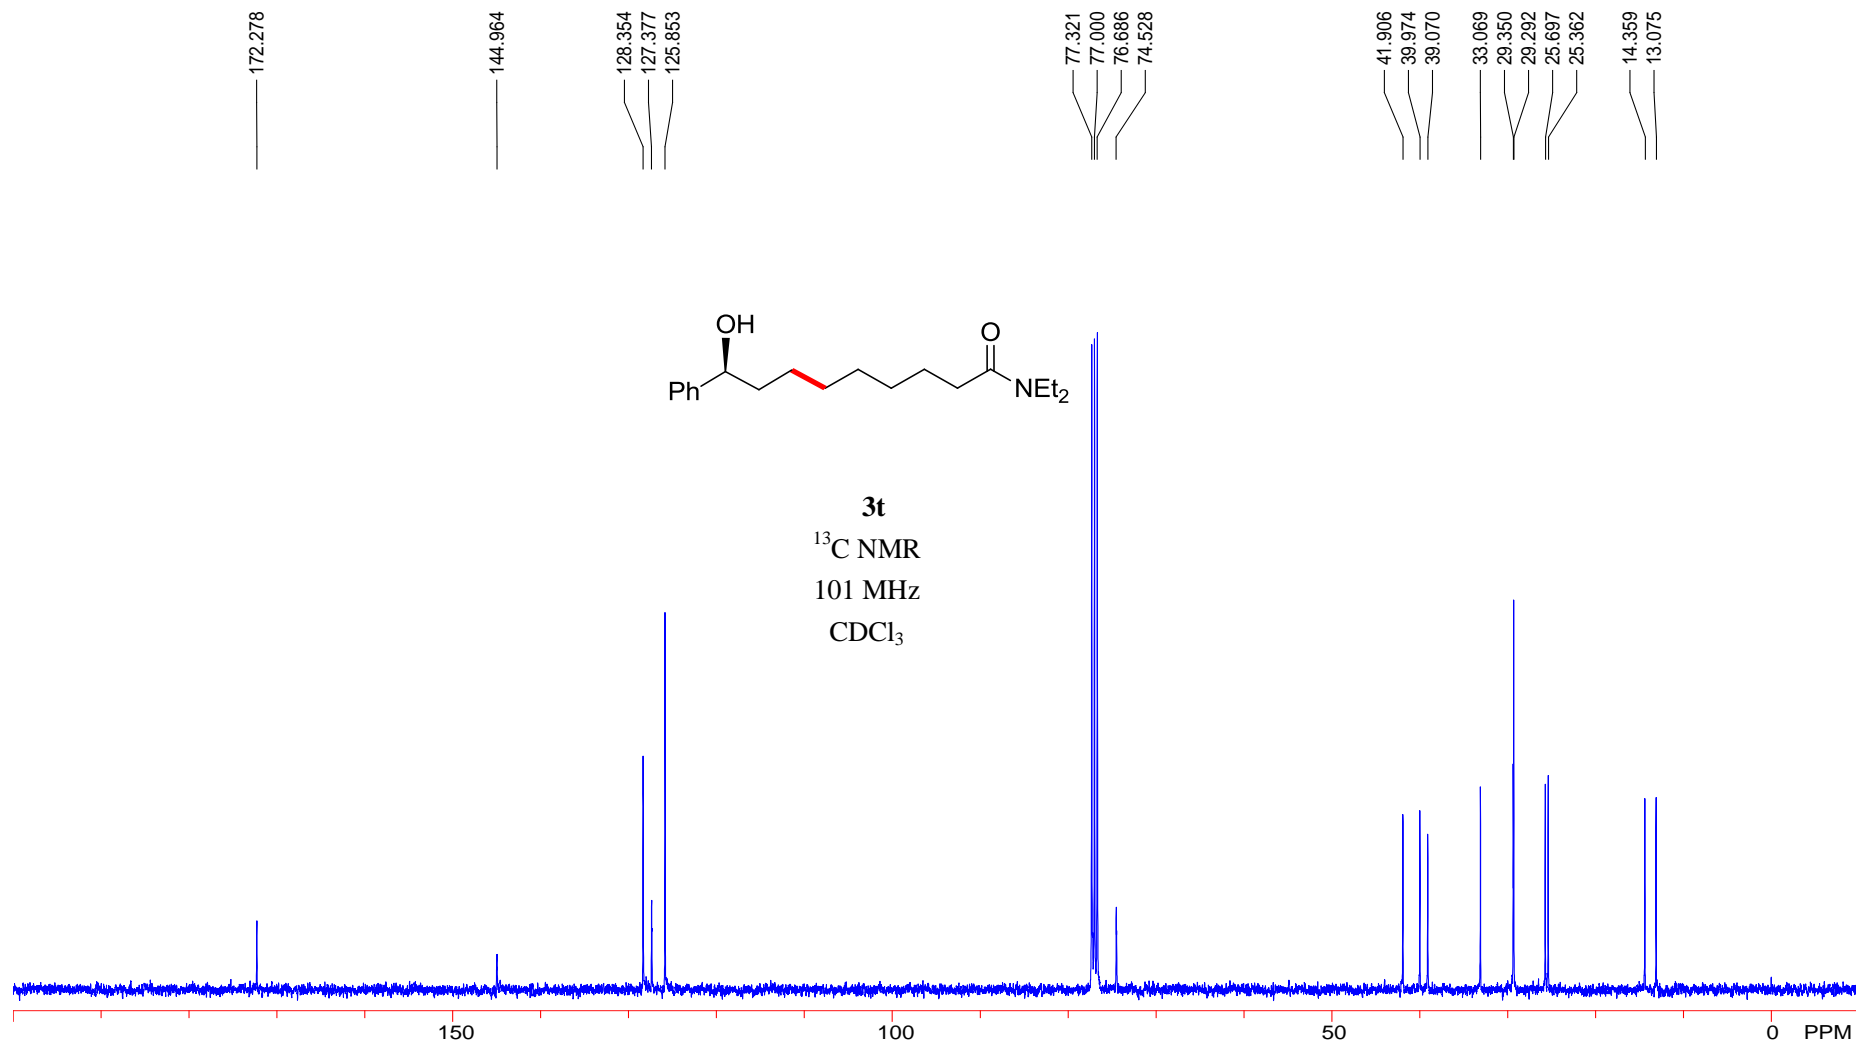

Supplementary Figure 167.  $^{13}\text{C}$  NMR spectrum for **3t**



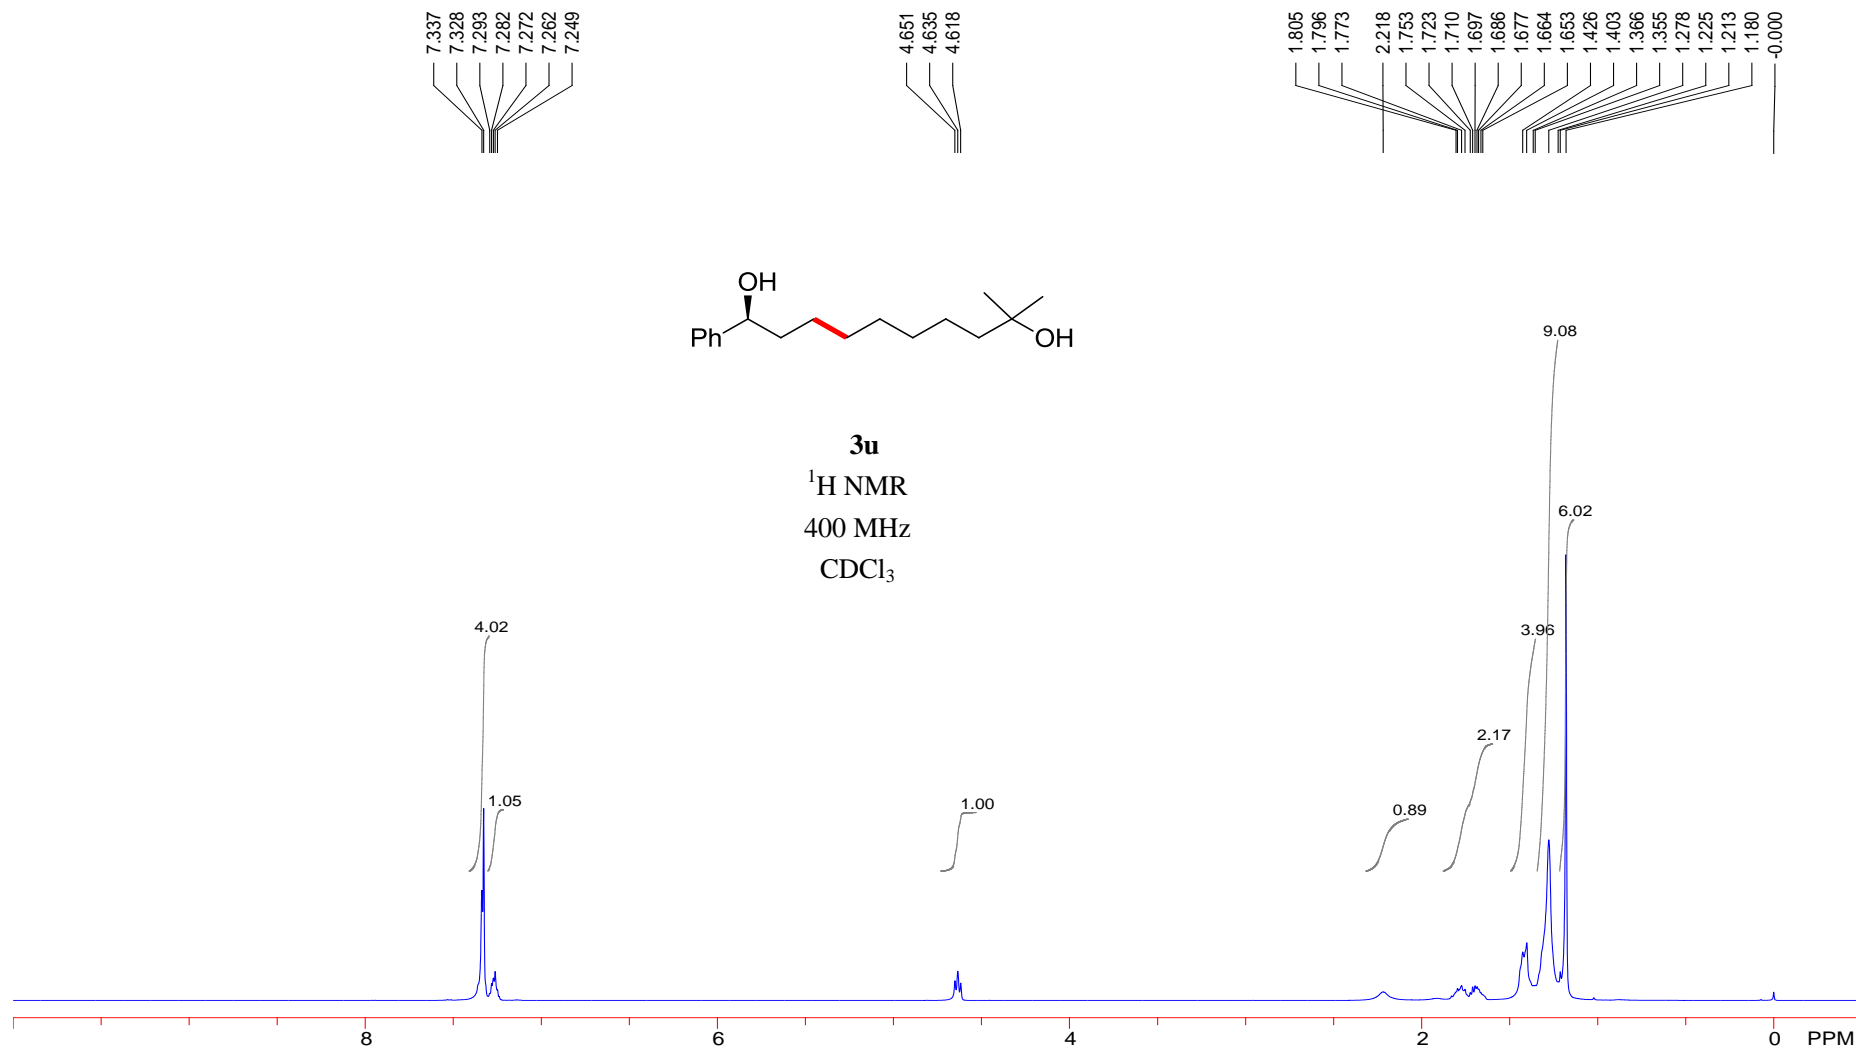

Supplementary Figure 168. <sup>1</sup>H NMR spectrum for **3u**

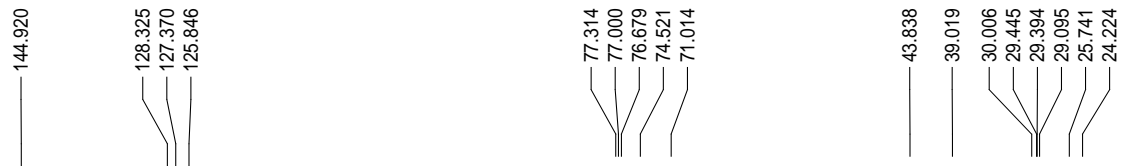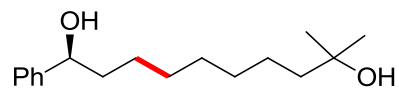

**3u**

<sup>13</sup>C NMR

101 MHz

CDCl<sub>3</sub>

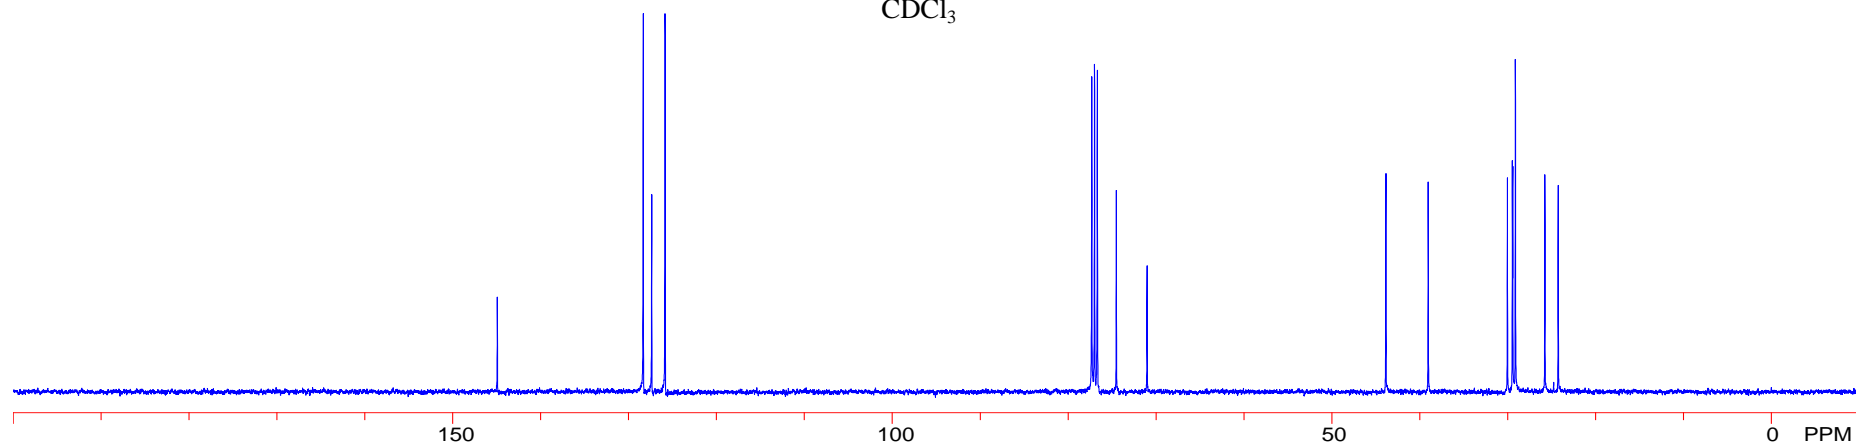

Supplementary Figure 169. <sup>13</sup>C NMR spectrum for **3u**

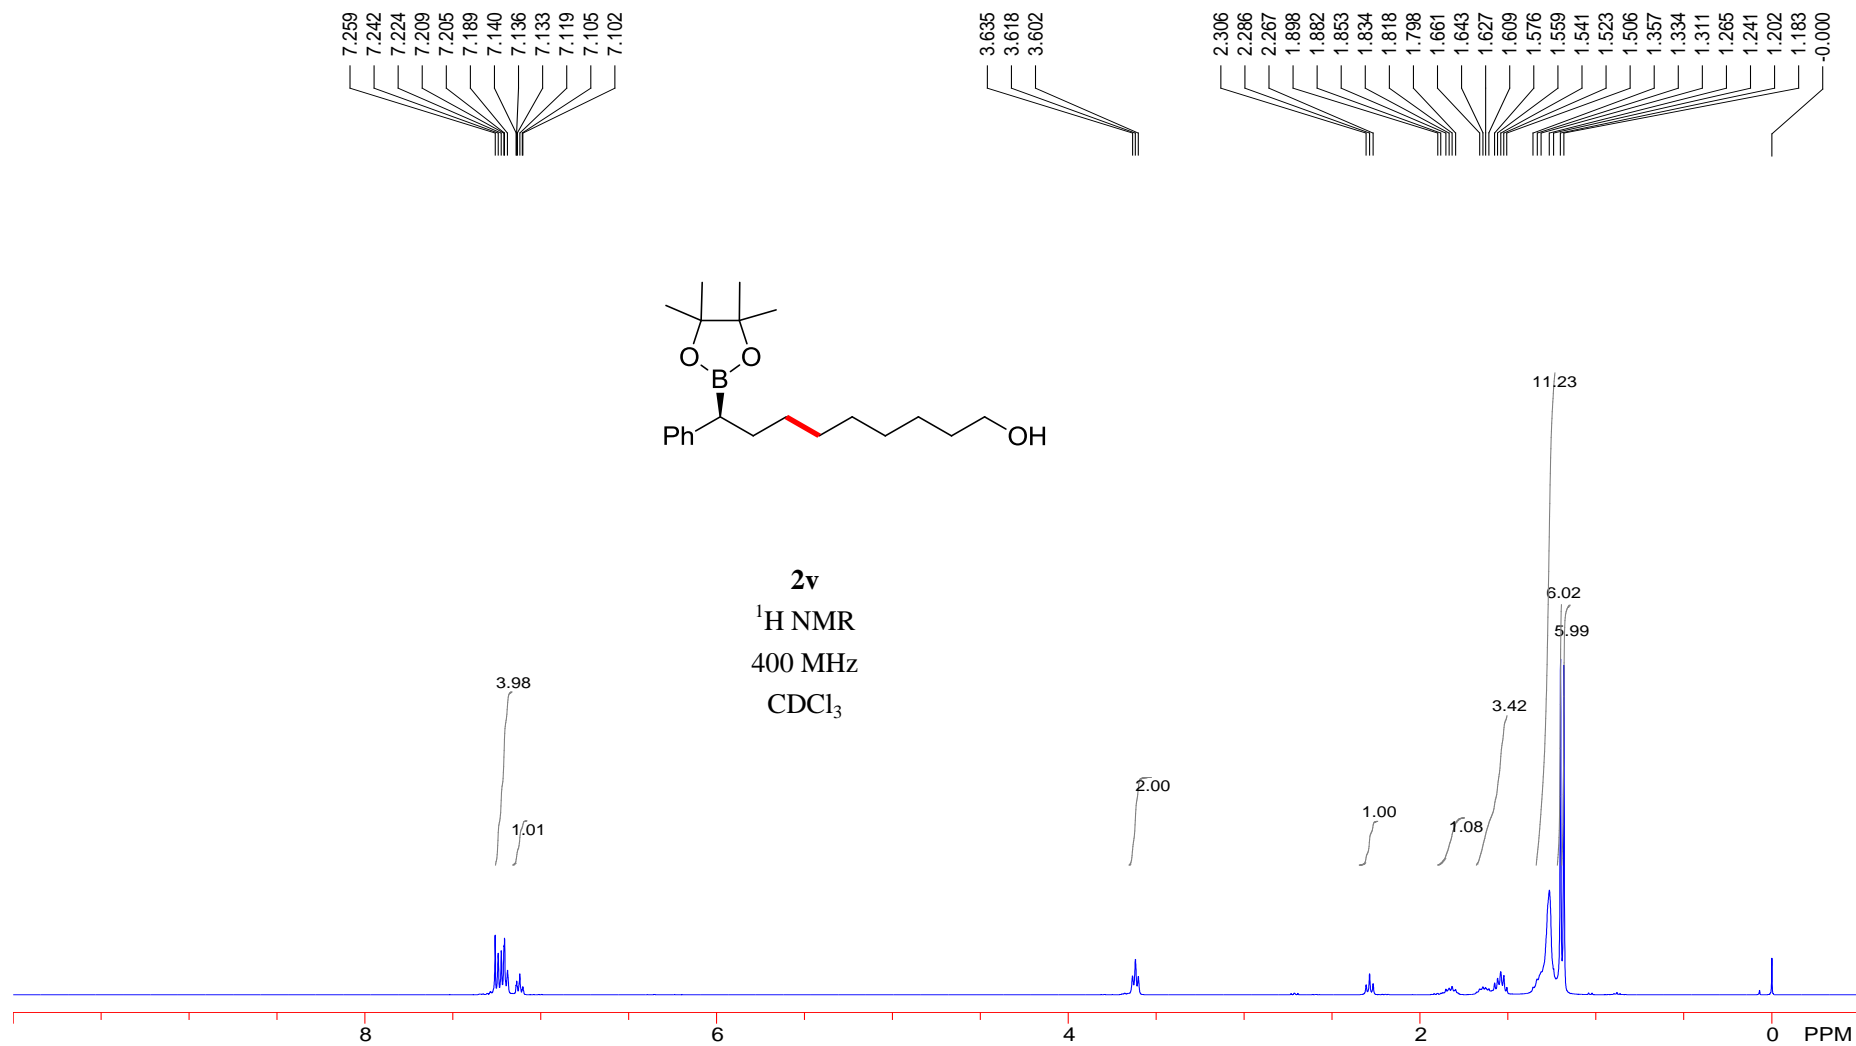

Supplementary Figure 170. <sup>1</sup>H NMR spectrum for **2v**

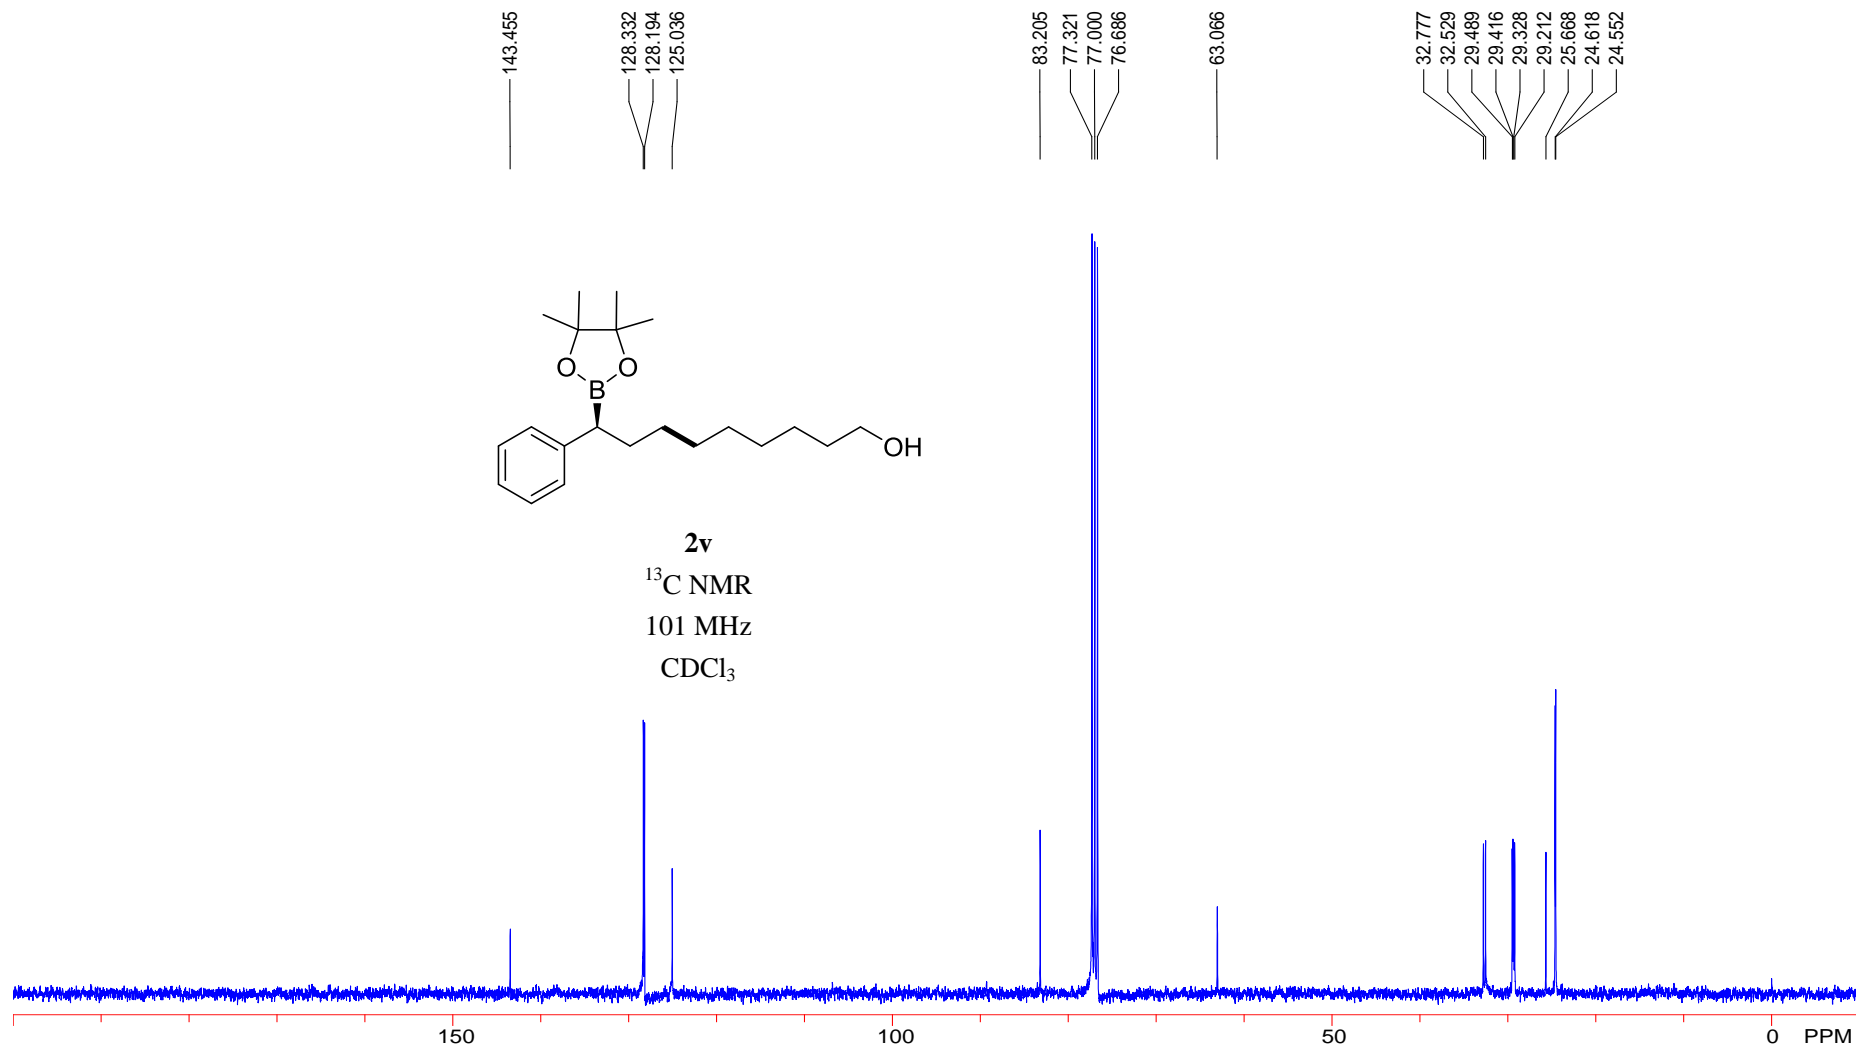

Supplementary Figure 171. <sup>1</sup>H NMR spectrum for **2v**

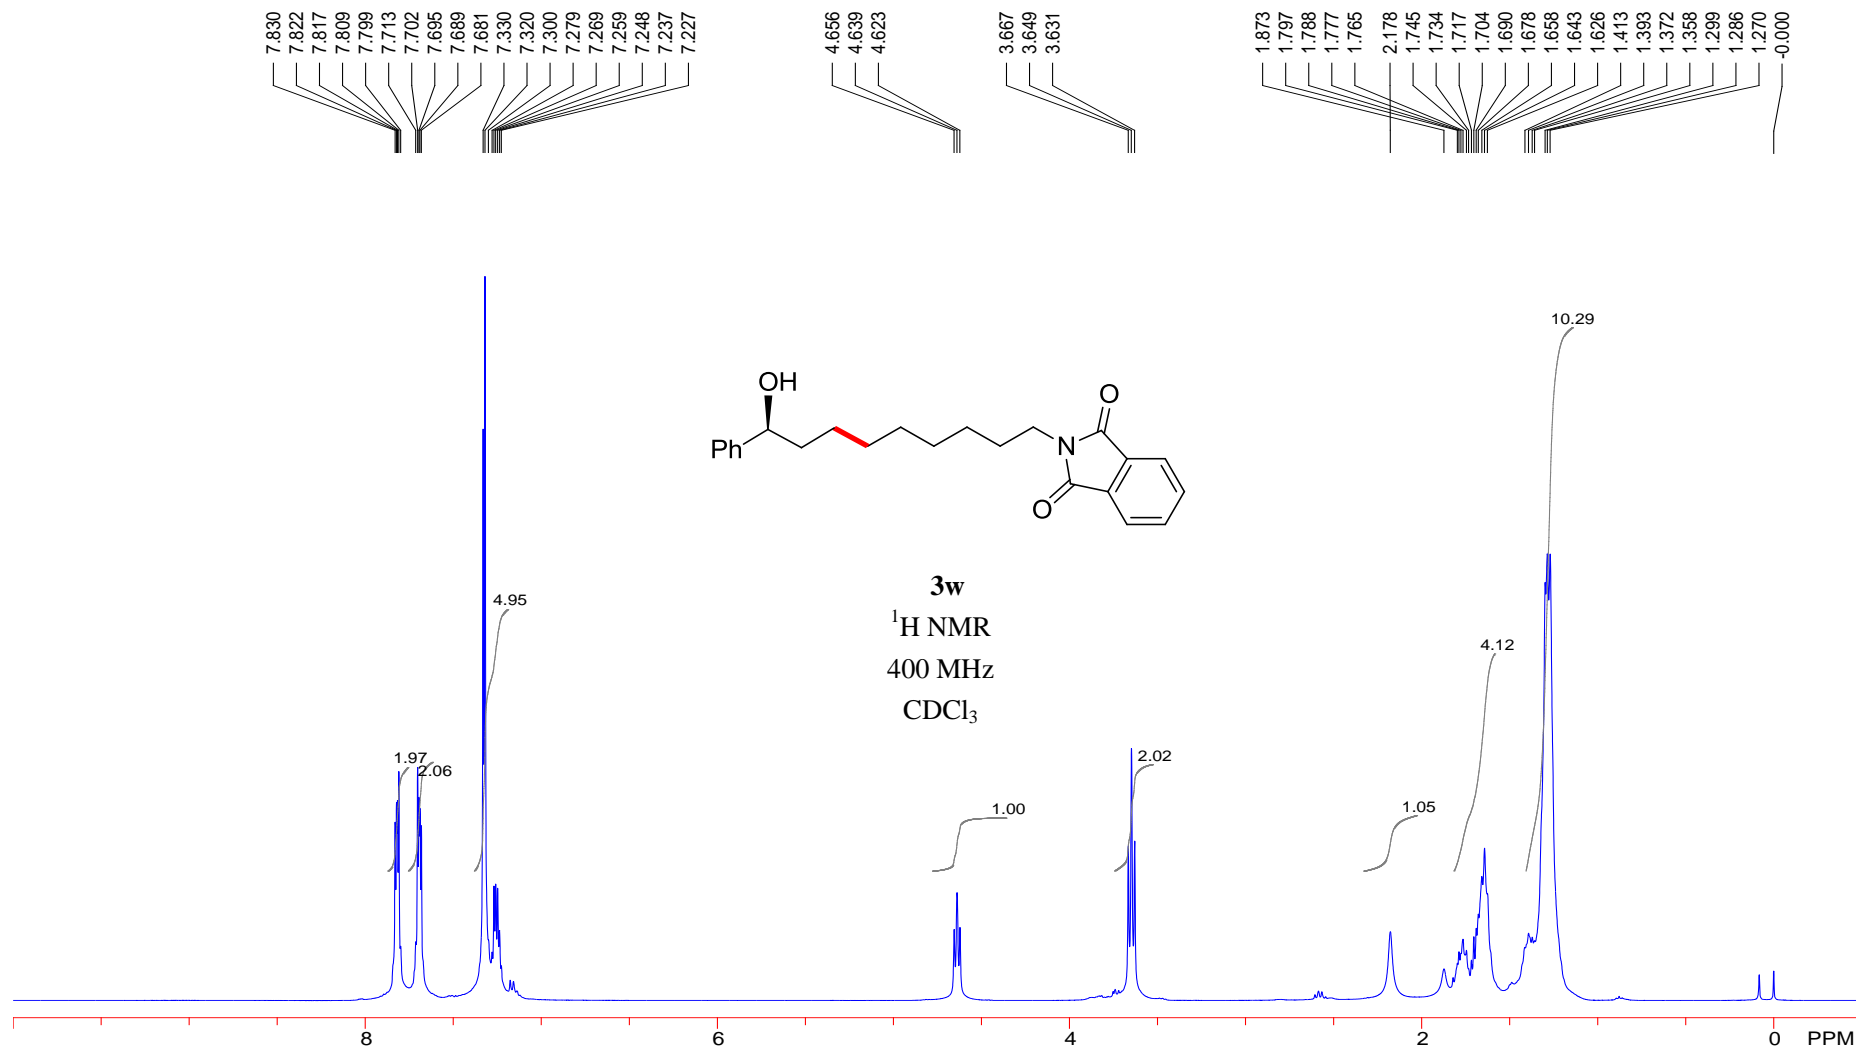

Supplementary Figure 172.  $^1\text{H NMR}$  spectrum for **3w**

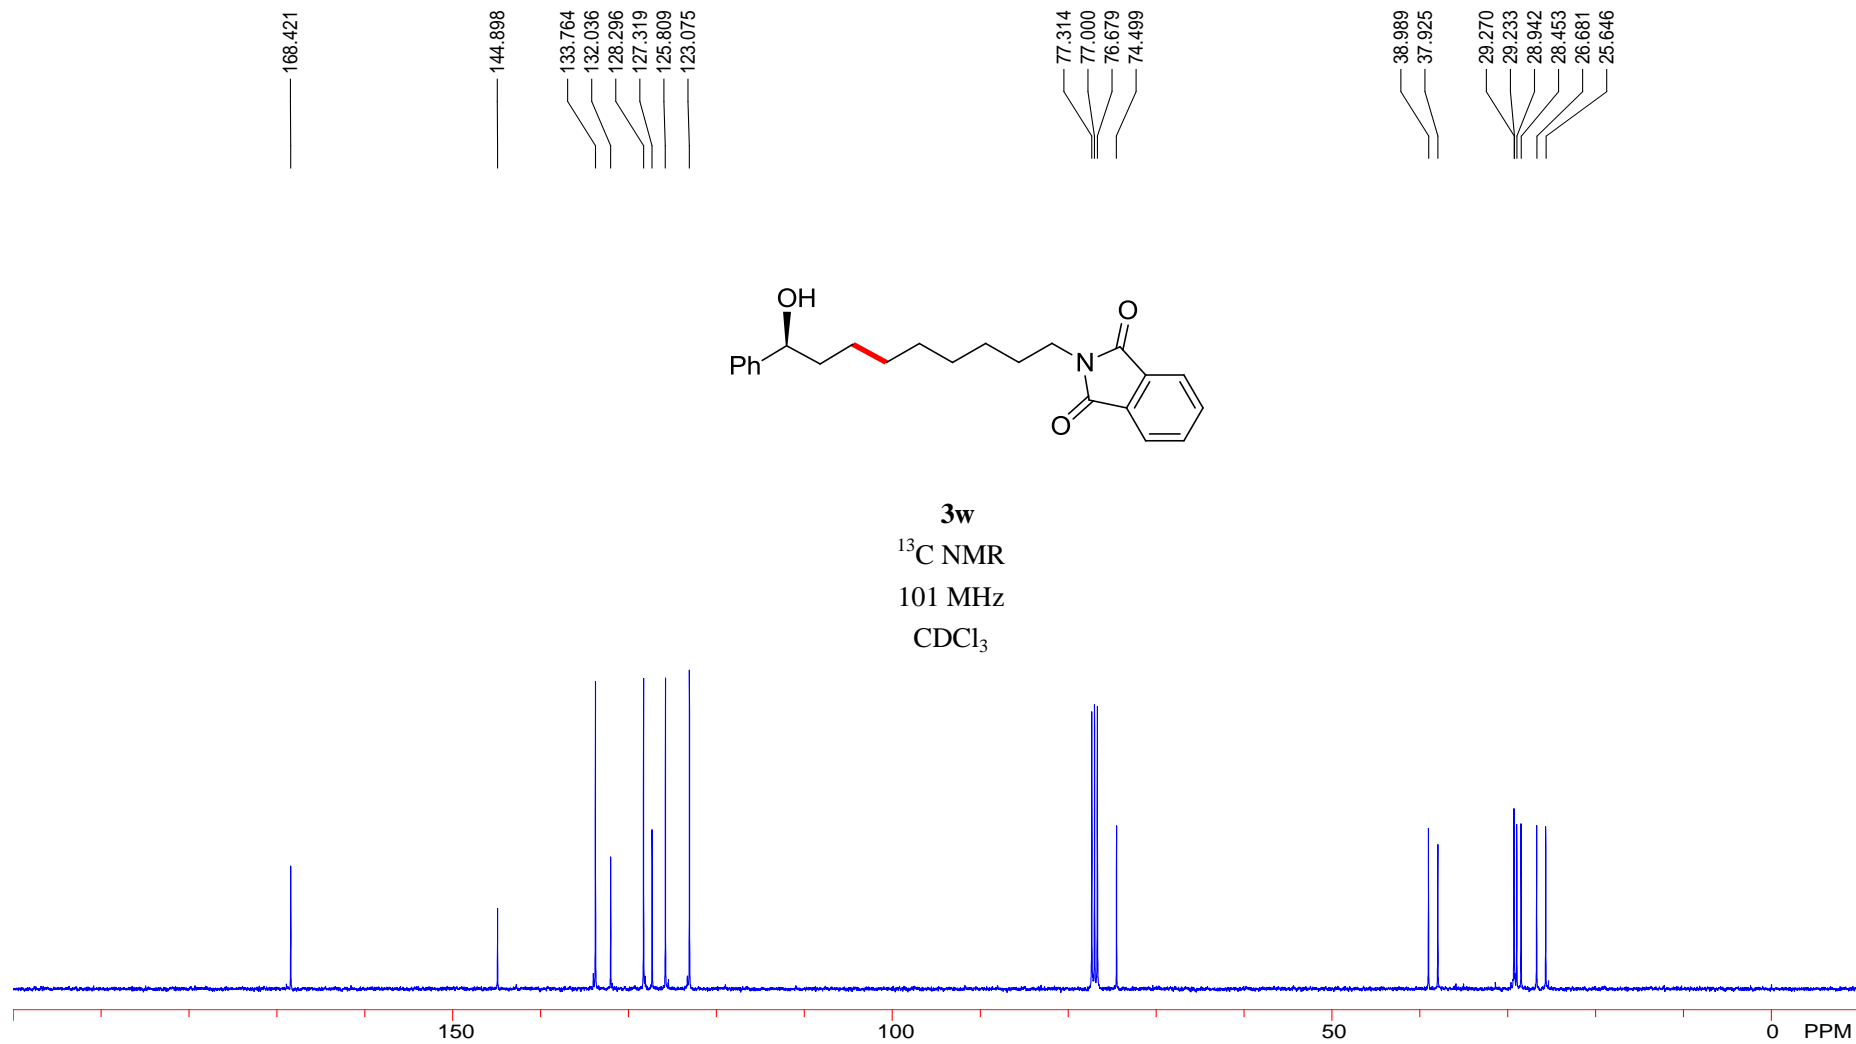

Supplementary Figure 173. <sup>13</sup>C NMR spectrum for **3w**

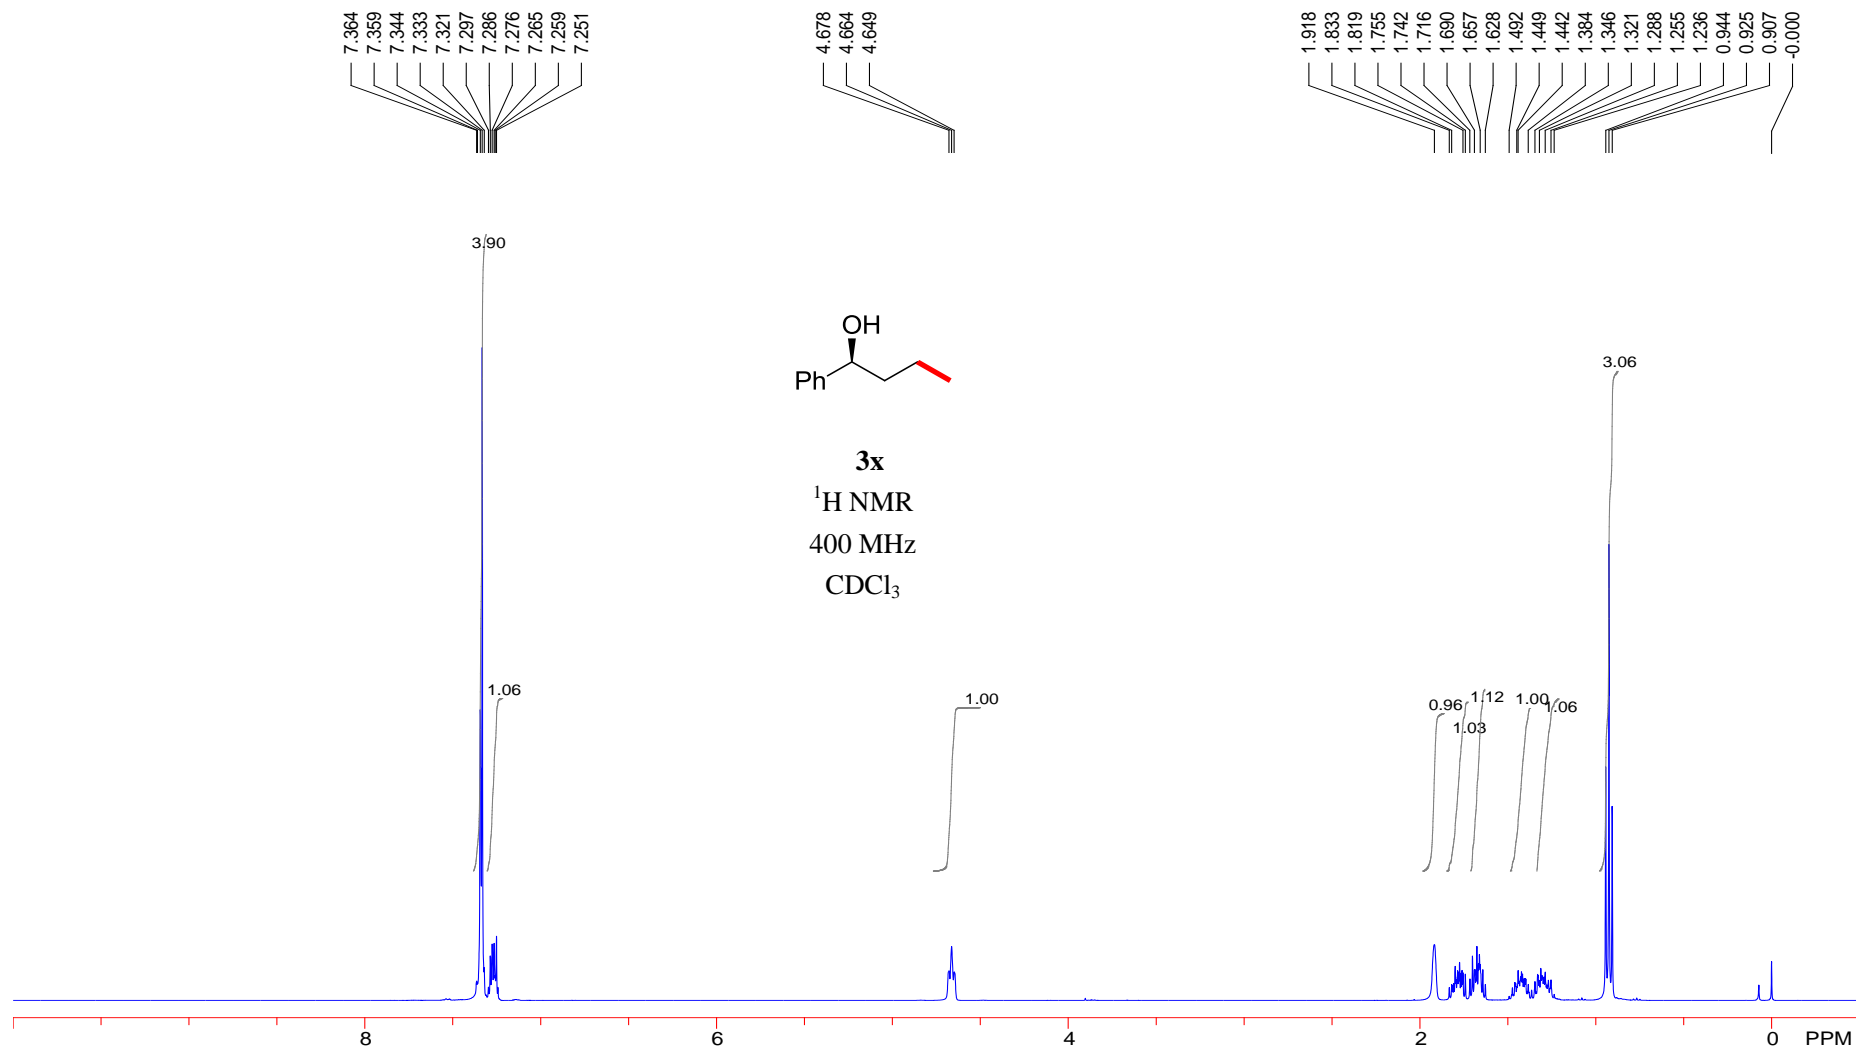

Supplementary Figure 174.  $^1\text{H NMR}$  spectrum for **3x**

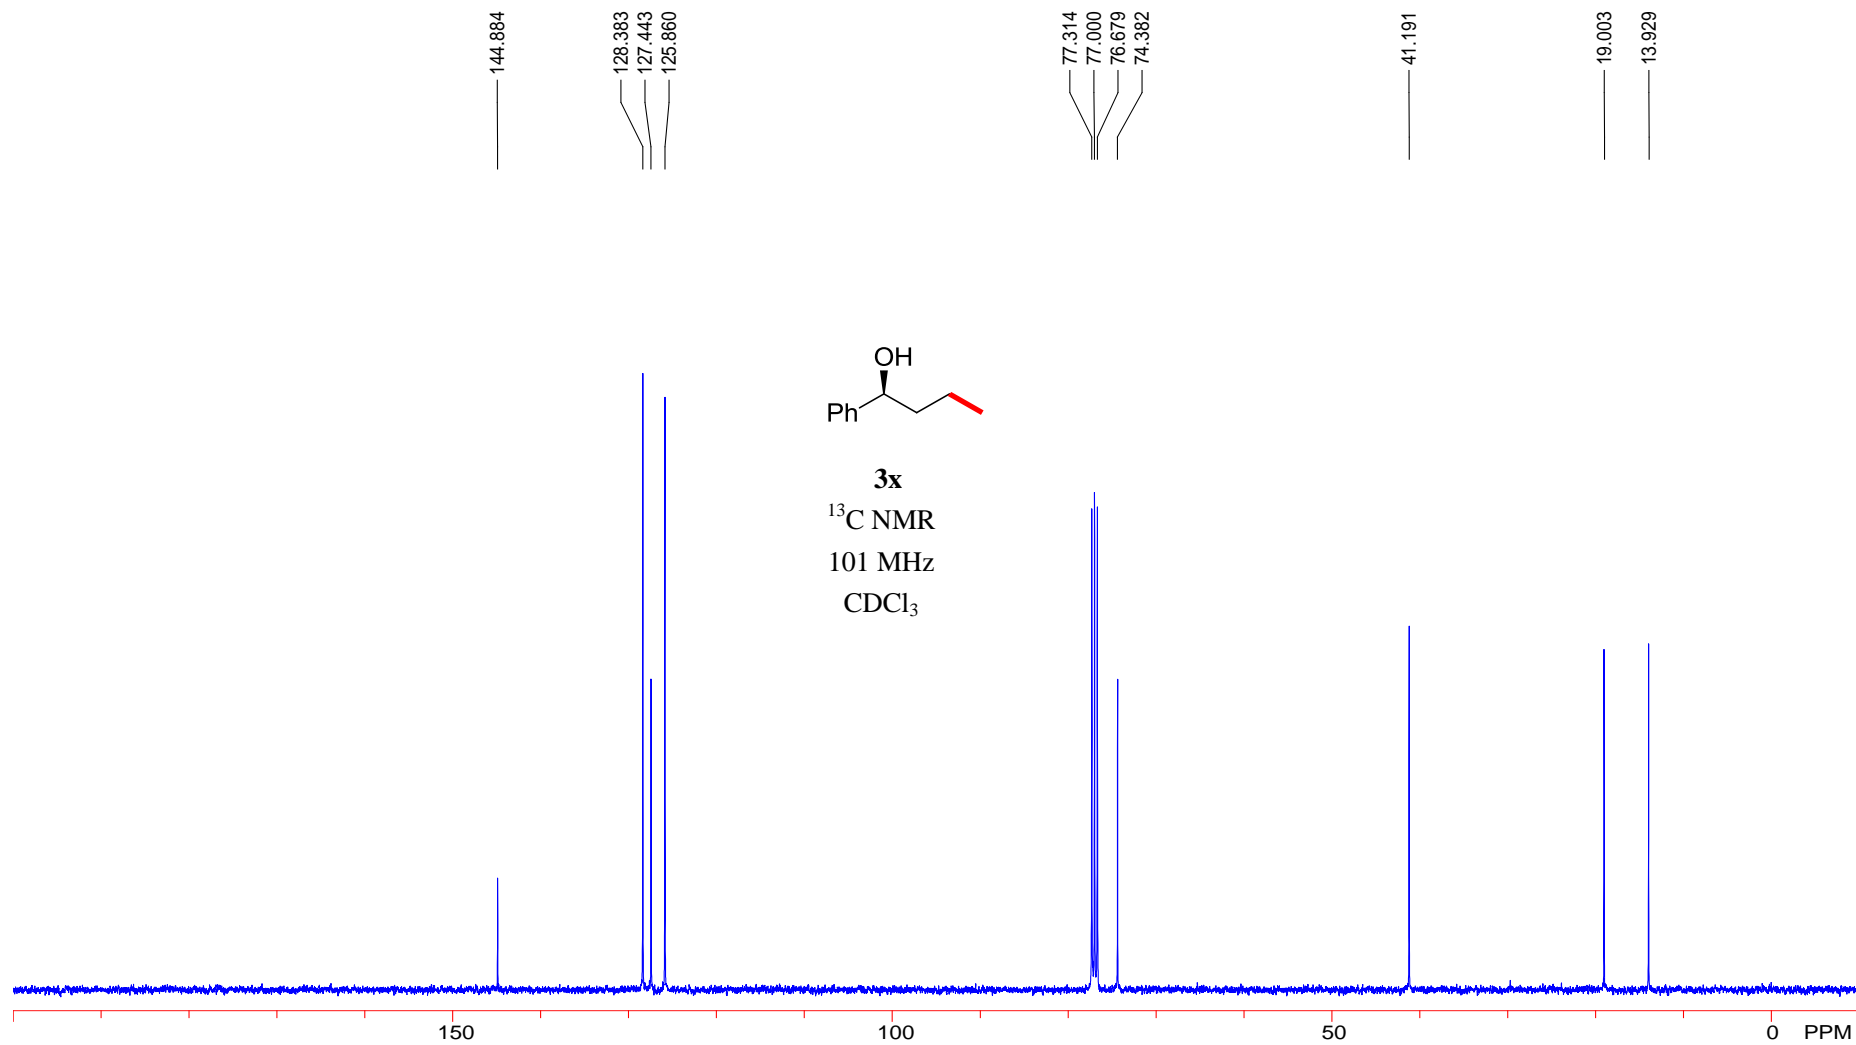

Supplementary Figure 175.  $^{13}\text{C}$  NMR spectrum for **3x**



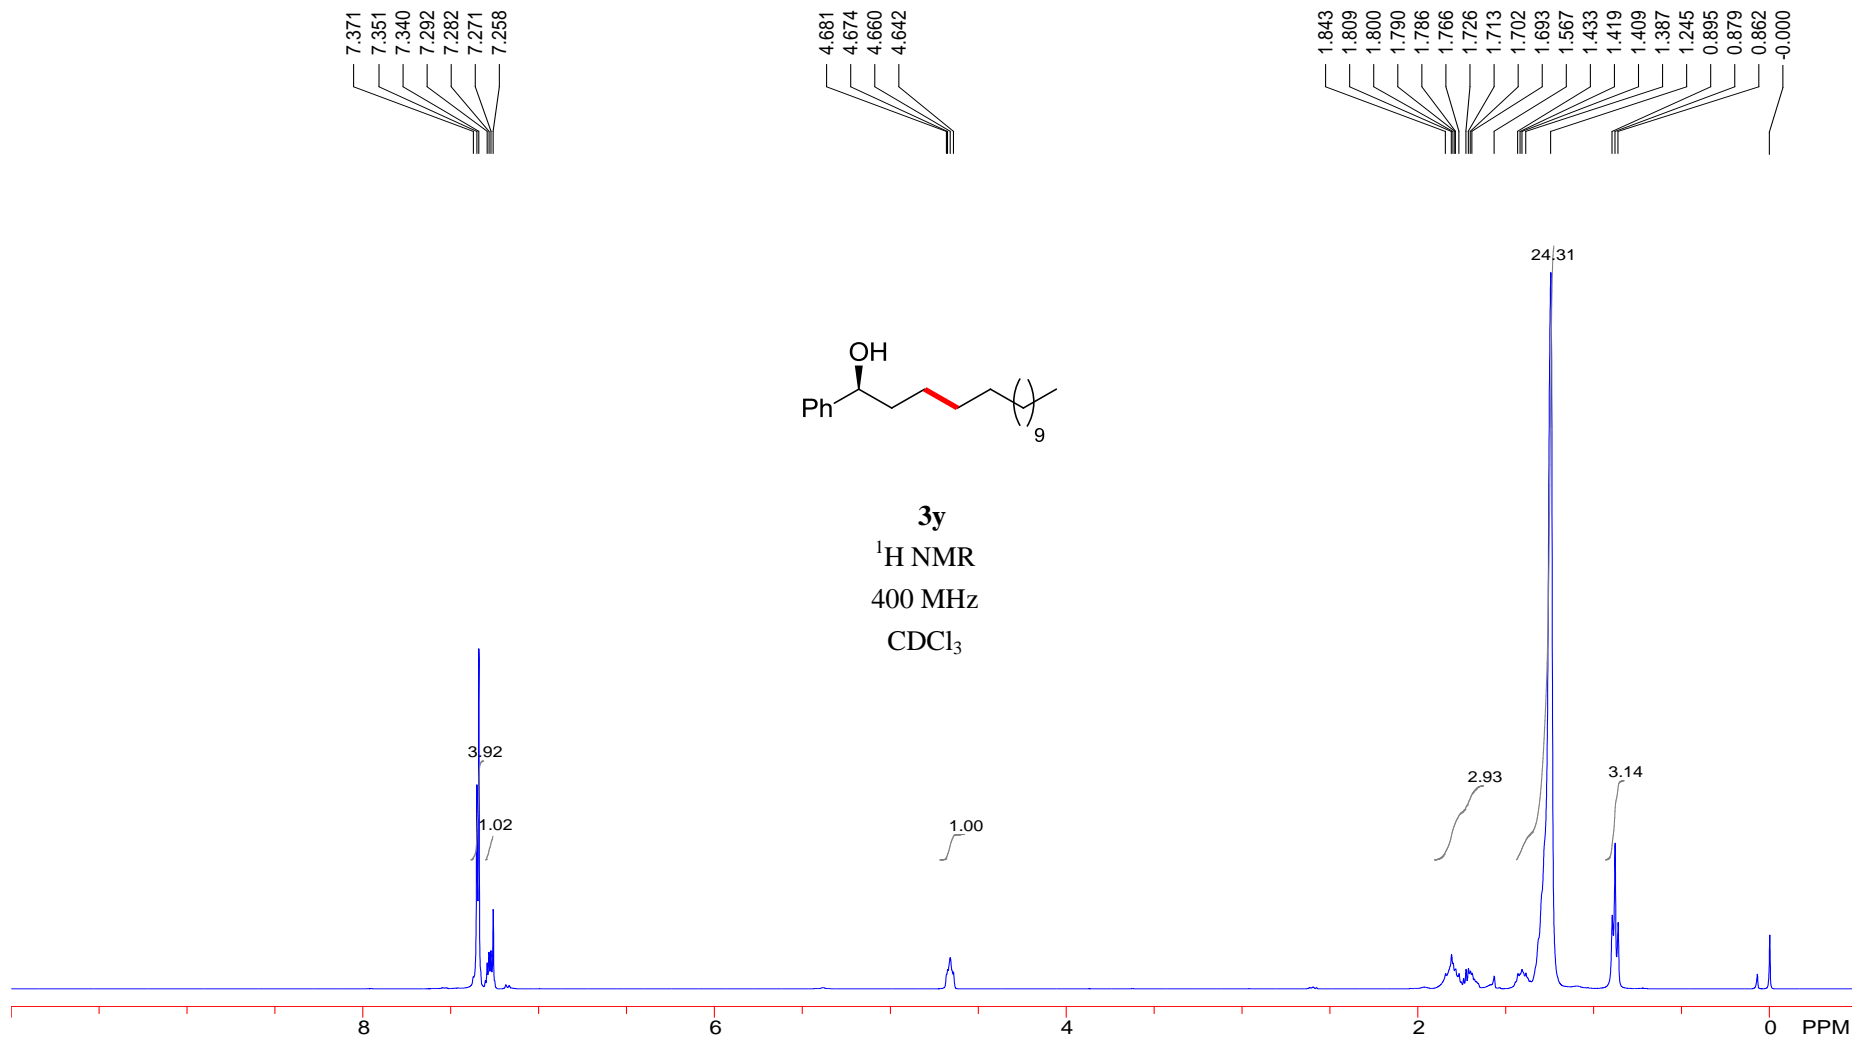

Supplementary Figure 176. <sup>1</sup>H NMR spectrum for **3y**

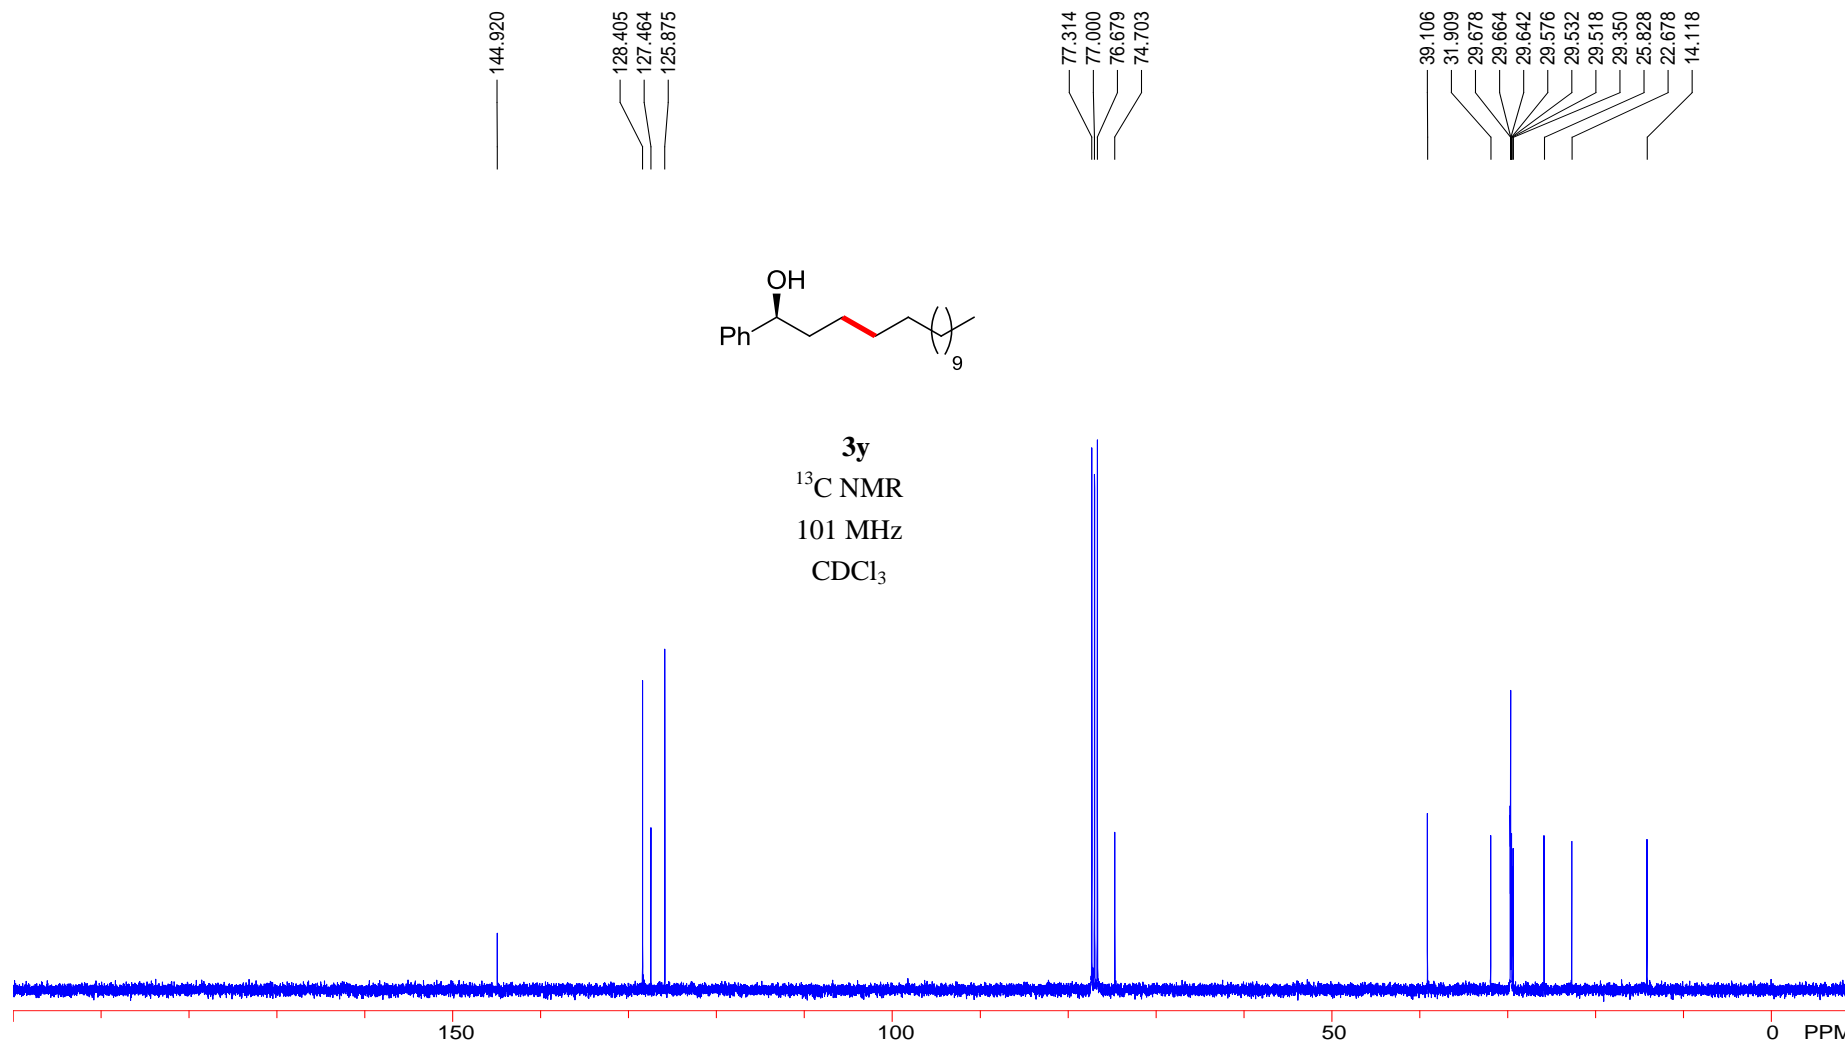

Supplementary Figure 177. <sup>13</sup>C NMR spectrum for **3y**

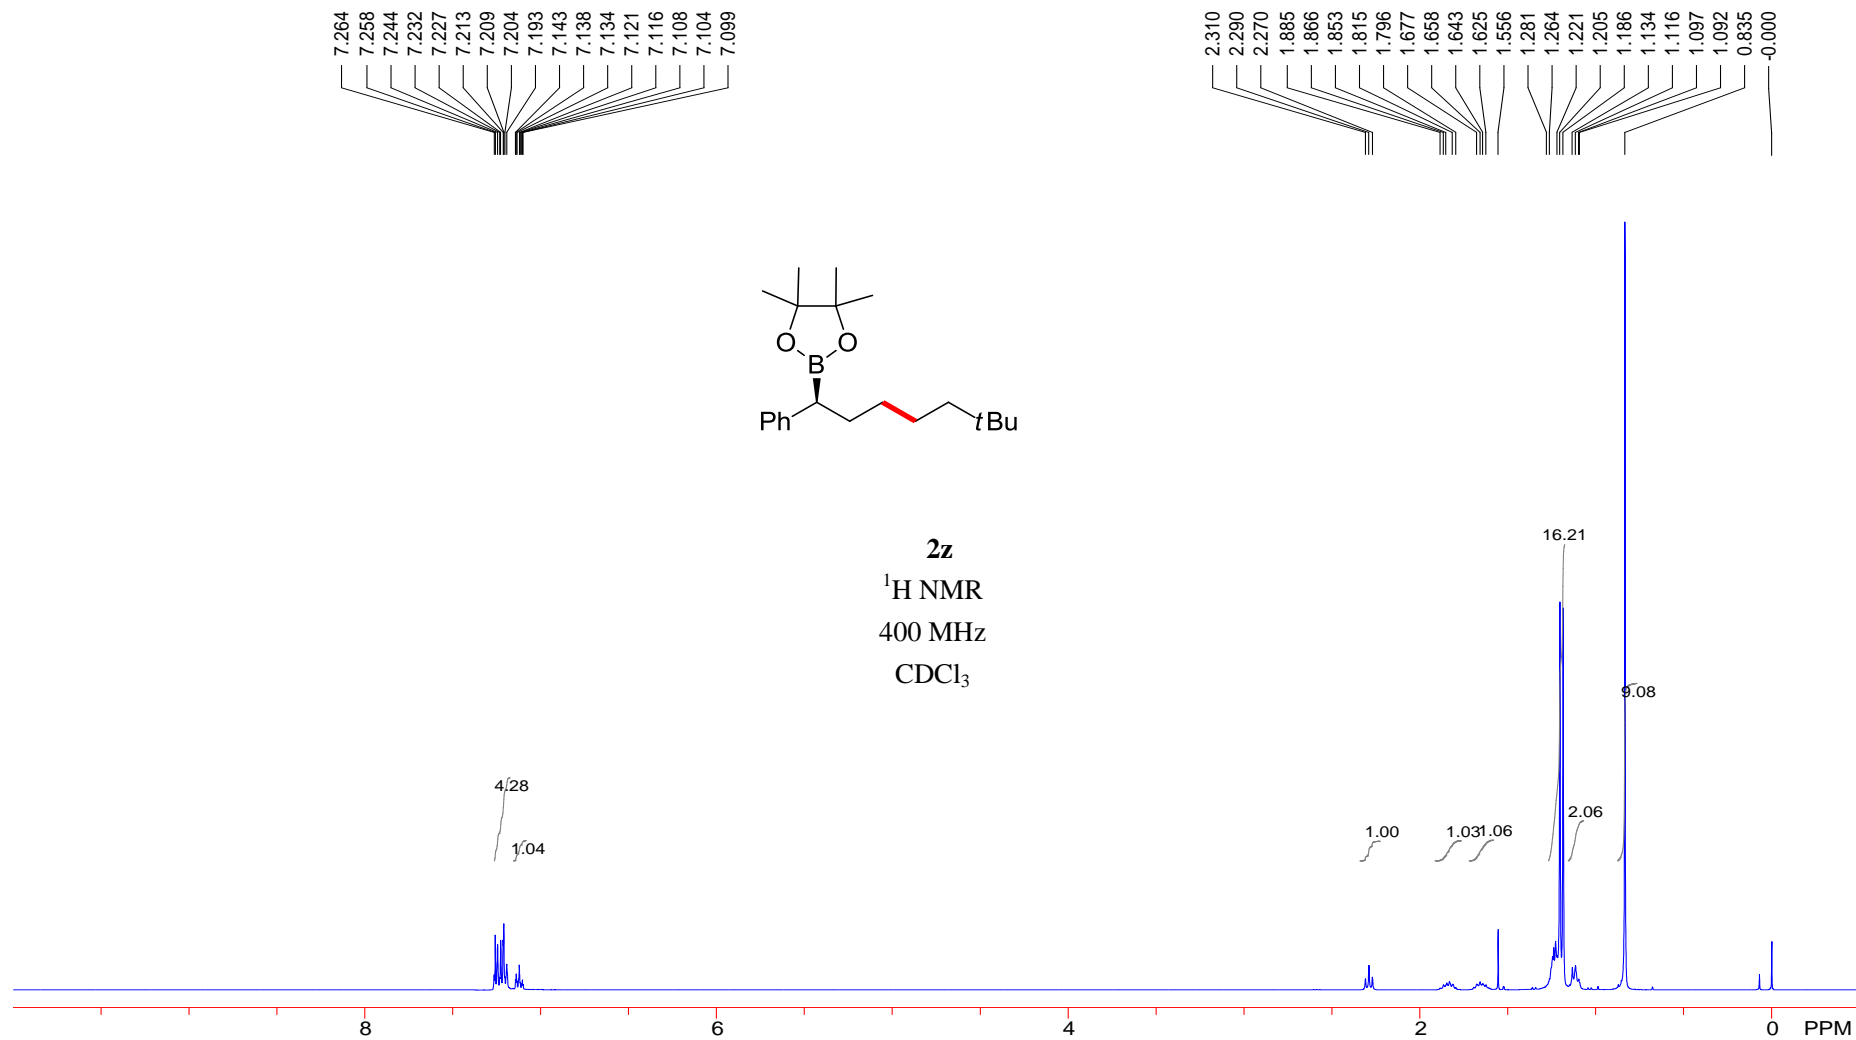

Supplementary Figure 178. <sup>1</sup>H NMR spectrum for **2z**

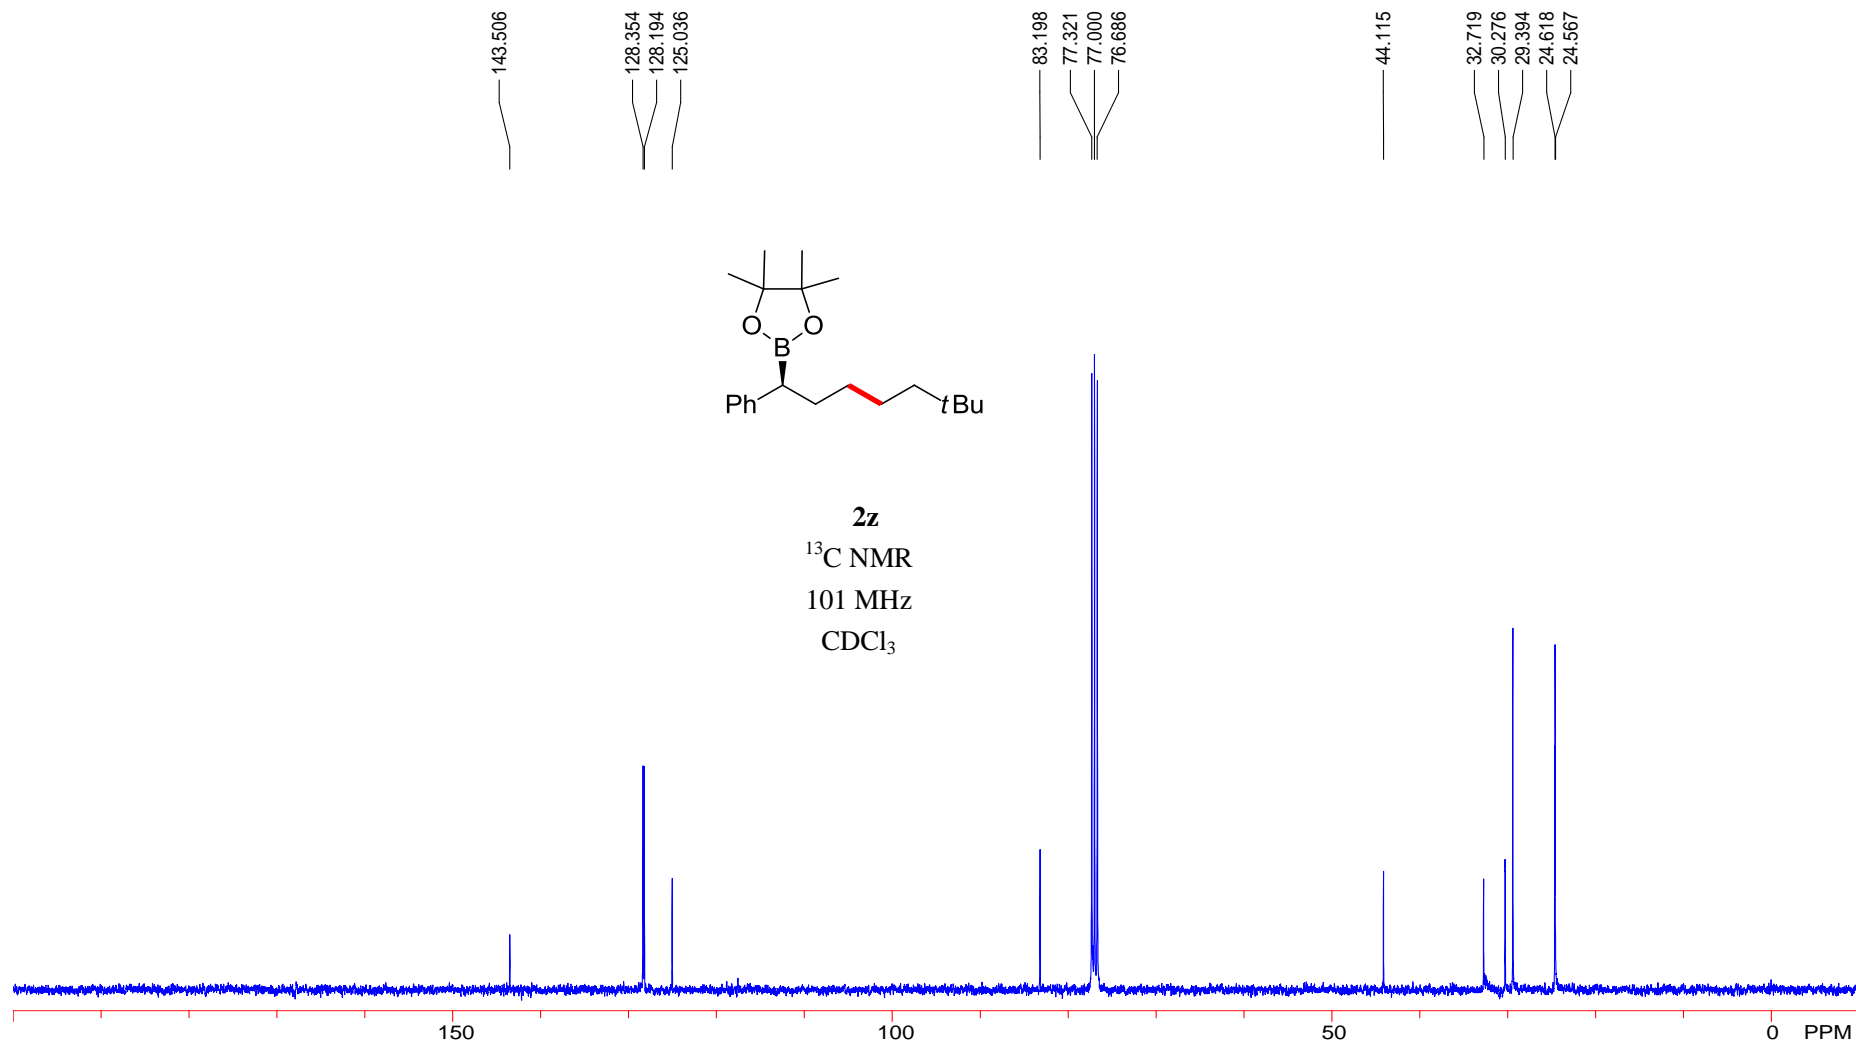

Supplementary Figure 179.  $^{13}\text{C}$  NMR spectrum for **2z**

7.257  
7.253  
7.245  
7.238  
7.226  
7.221  
7.210  
7.206  
7.190  
7.179  
7.135  
7.131  
7.127  
7.114  
7.108  
7.101  
7.096  
7.092

2.307  
2.288  
2.268  
1.852  
1.832  
1.818  
1.807  
1.798  
1.676  
1.647  
1.608  
1.568  
1.283  
1.255  
1.219  
1.200  
1.181  
1.152  
1.101  
1.070  
0.879  
0.865  
0.838  
0.813  
0.785  
0.000

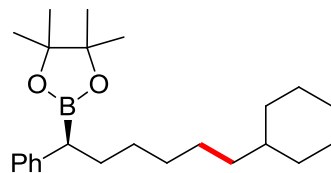

**2aa**

<sup>1</sup>H NMR  
400 MHz  
CDCl<sub>3</sub>

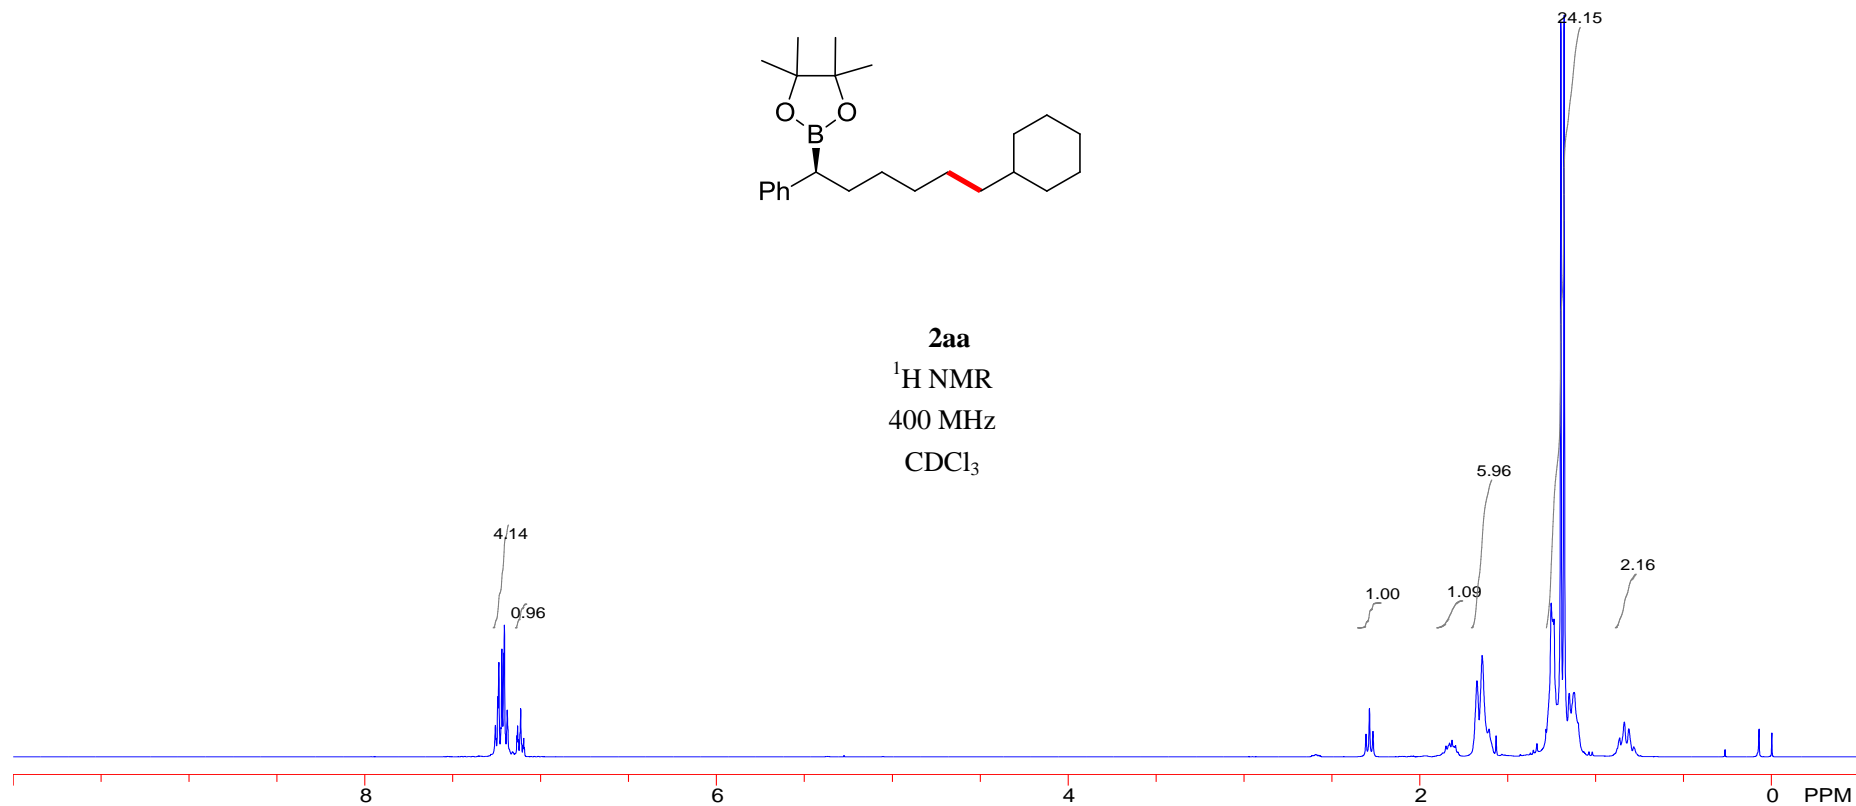

**Supplementary Figure 180. <sup>1</sup>H NMR spectrum for 2aa**

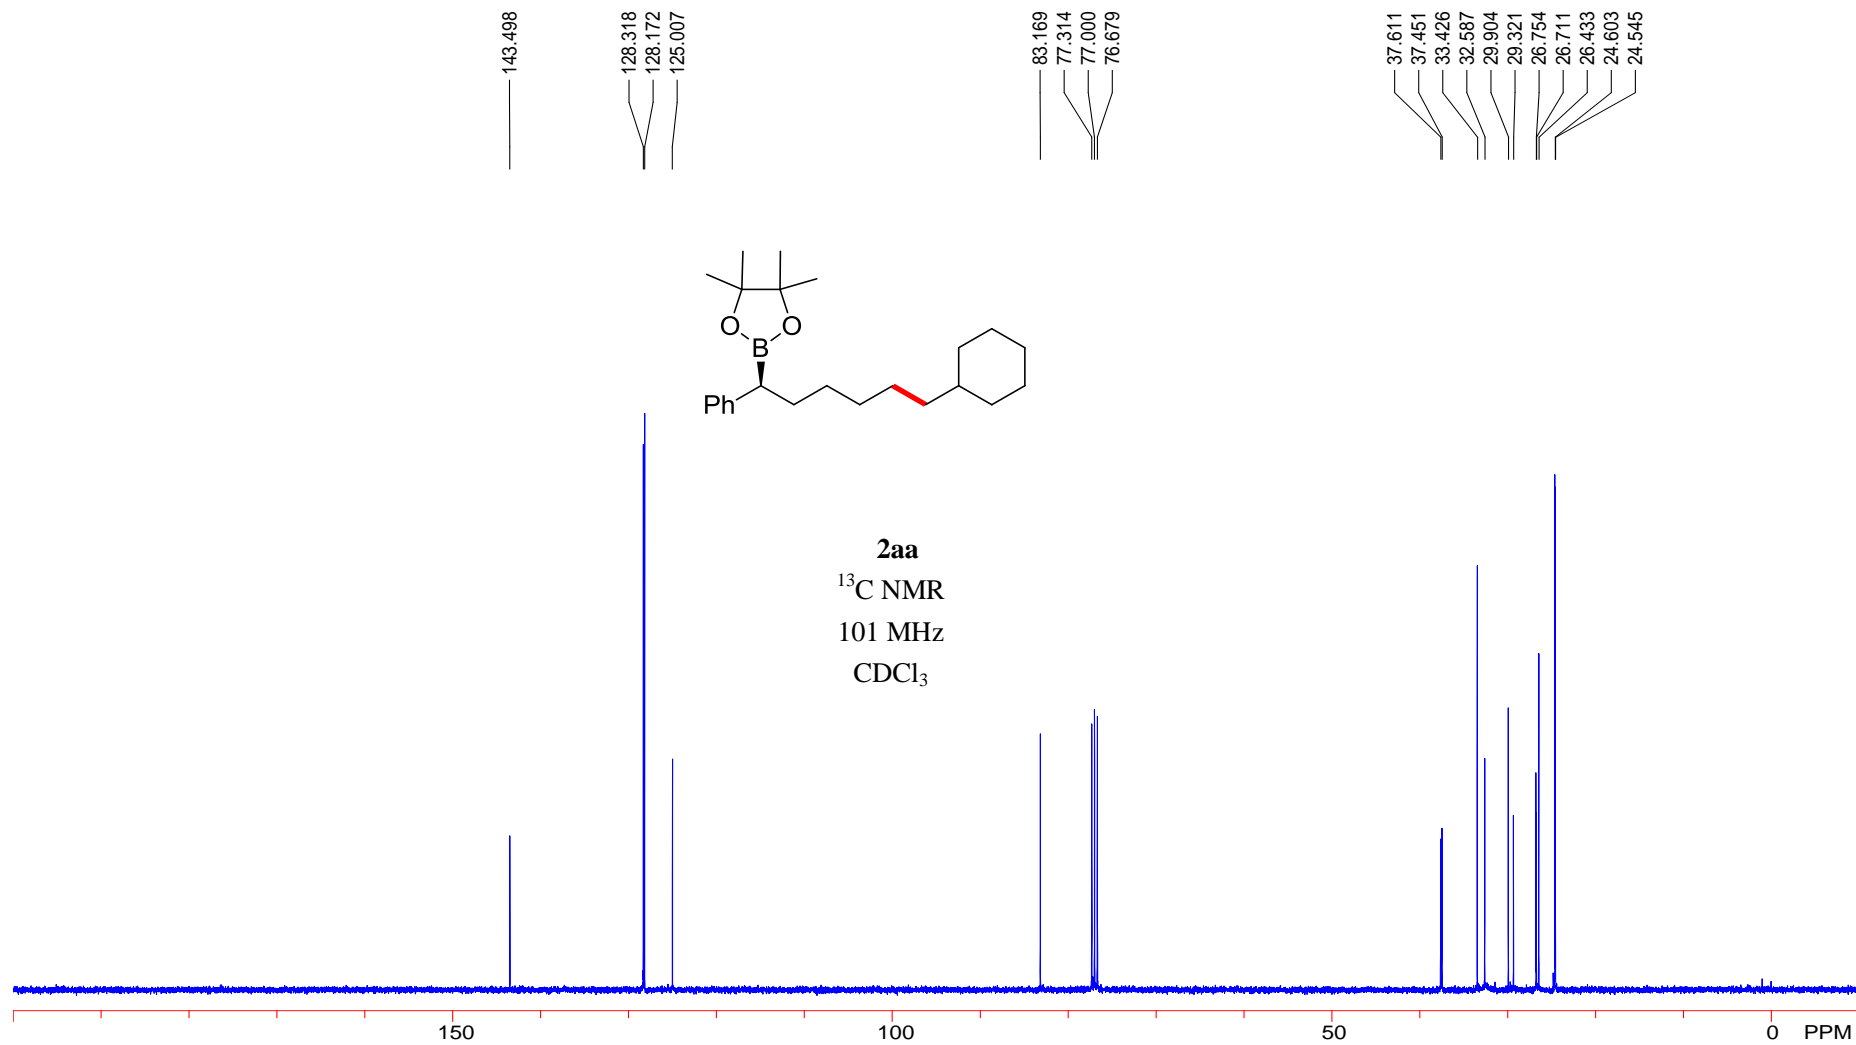

**Supplementary Figure 181.**  $^{13}\text{C}$  NMR spectrum for **2aa**

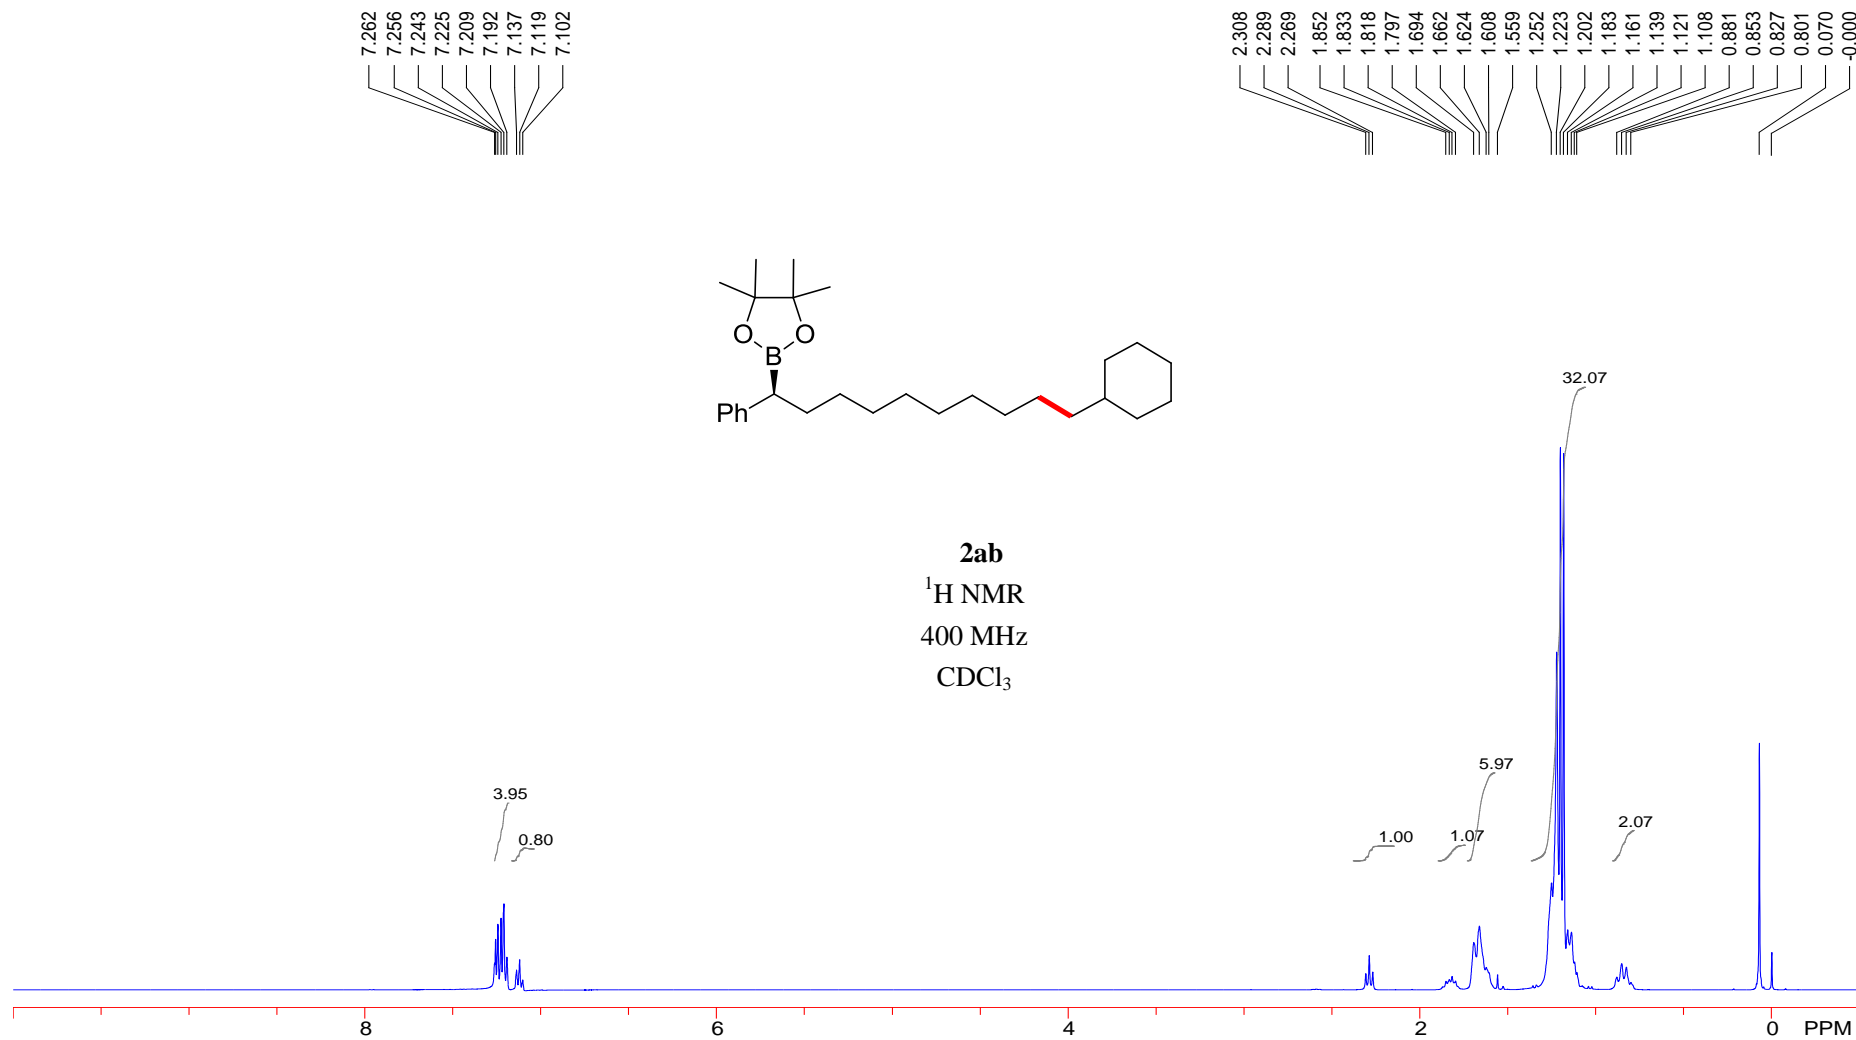

**Supplementary Figure 182.** <sup>1</sup>H NMR spectrum for **2ab**

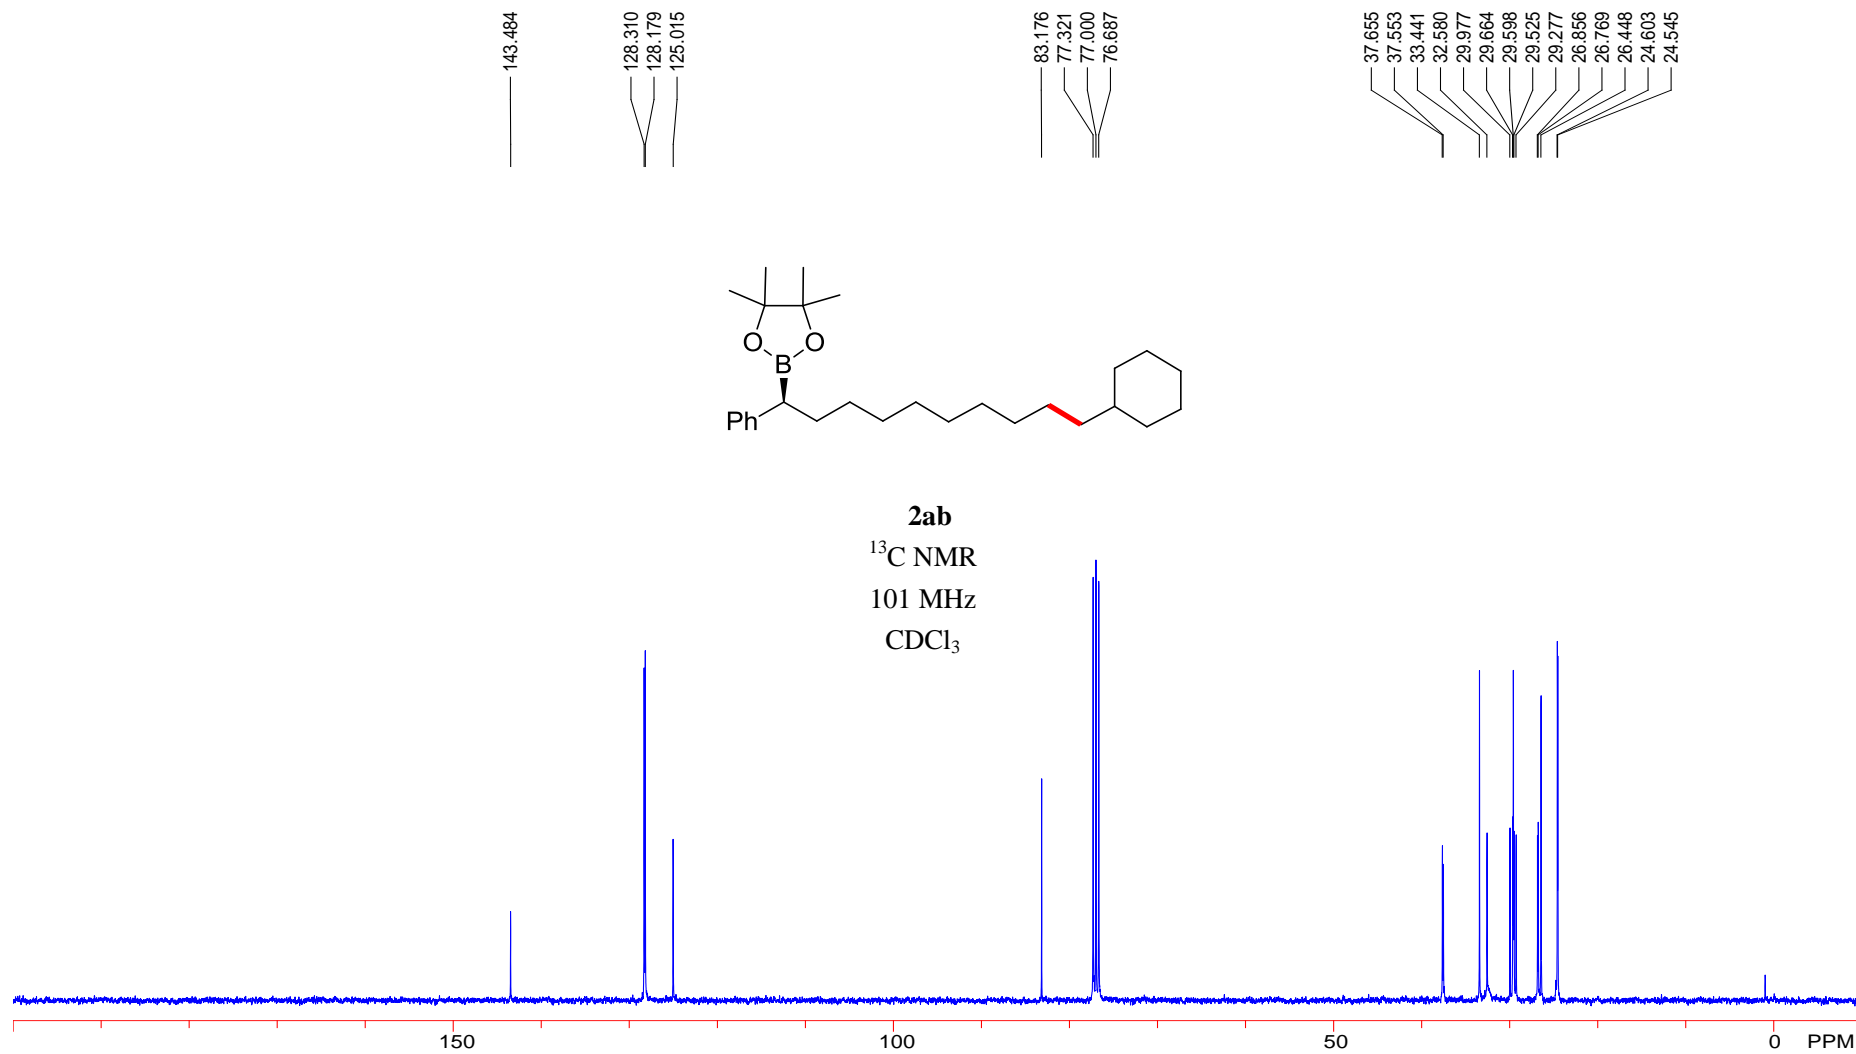

**Supplementary Figure 183.** <sup>13</sup>C NMR spectrum for **2ab**



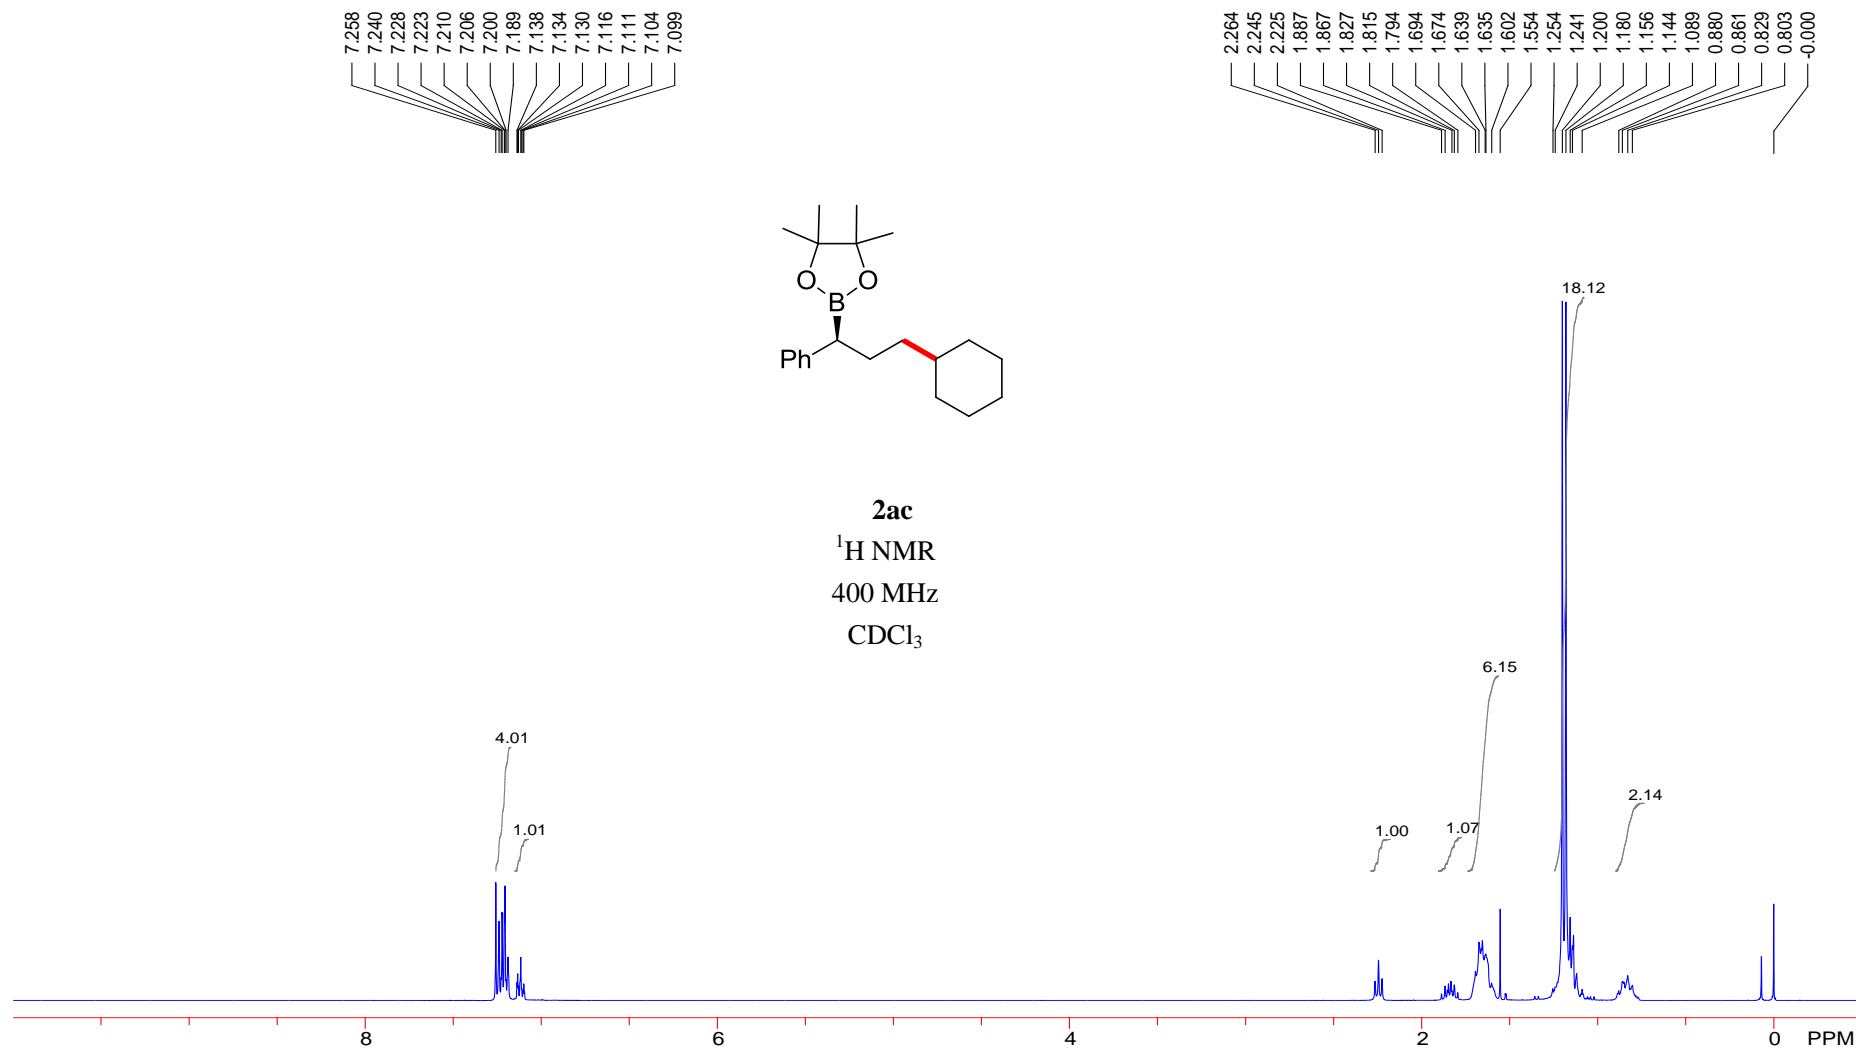

**Supplementary Figure 184.** <sup>1</sup>H NMR spectrum for **2ac**

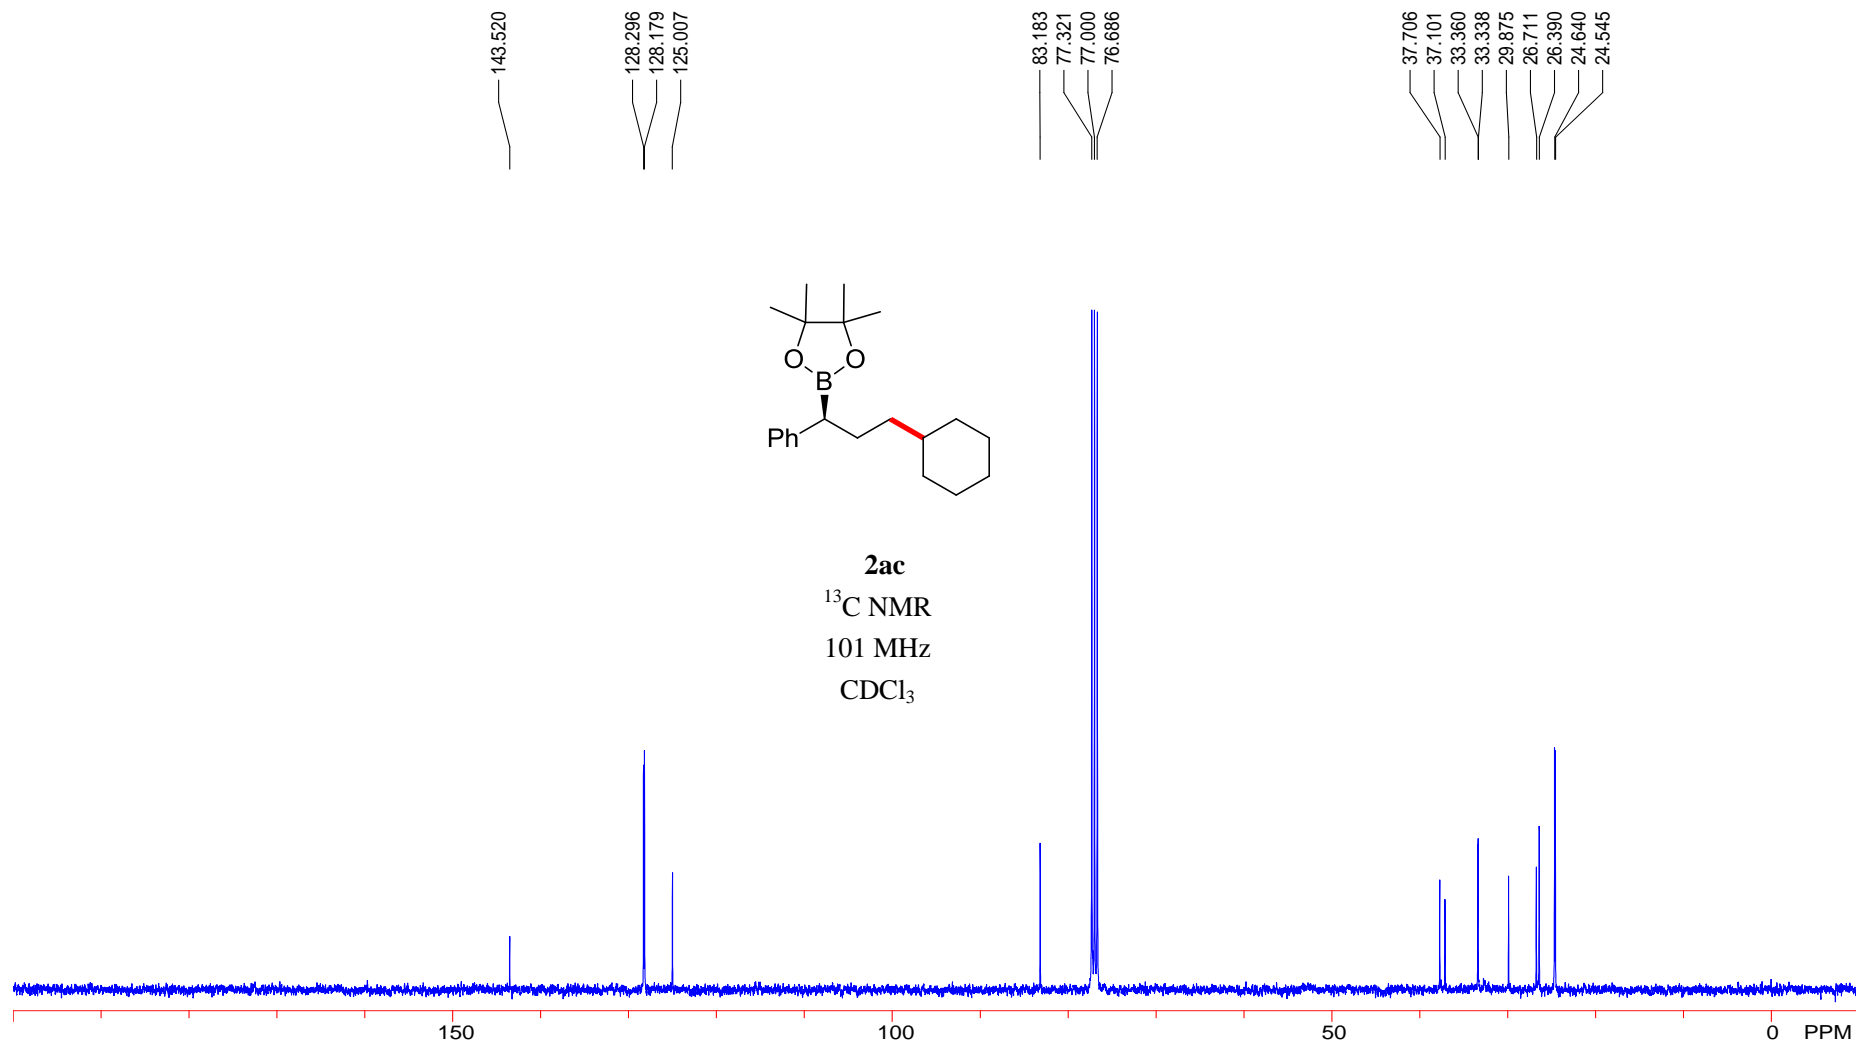

Supplementary Figure 185. <sup>13</sup>C NMR spectrum for **2ac**

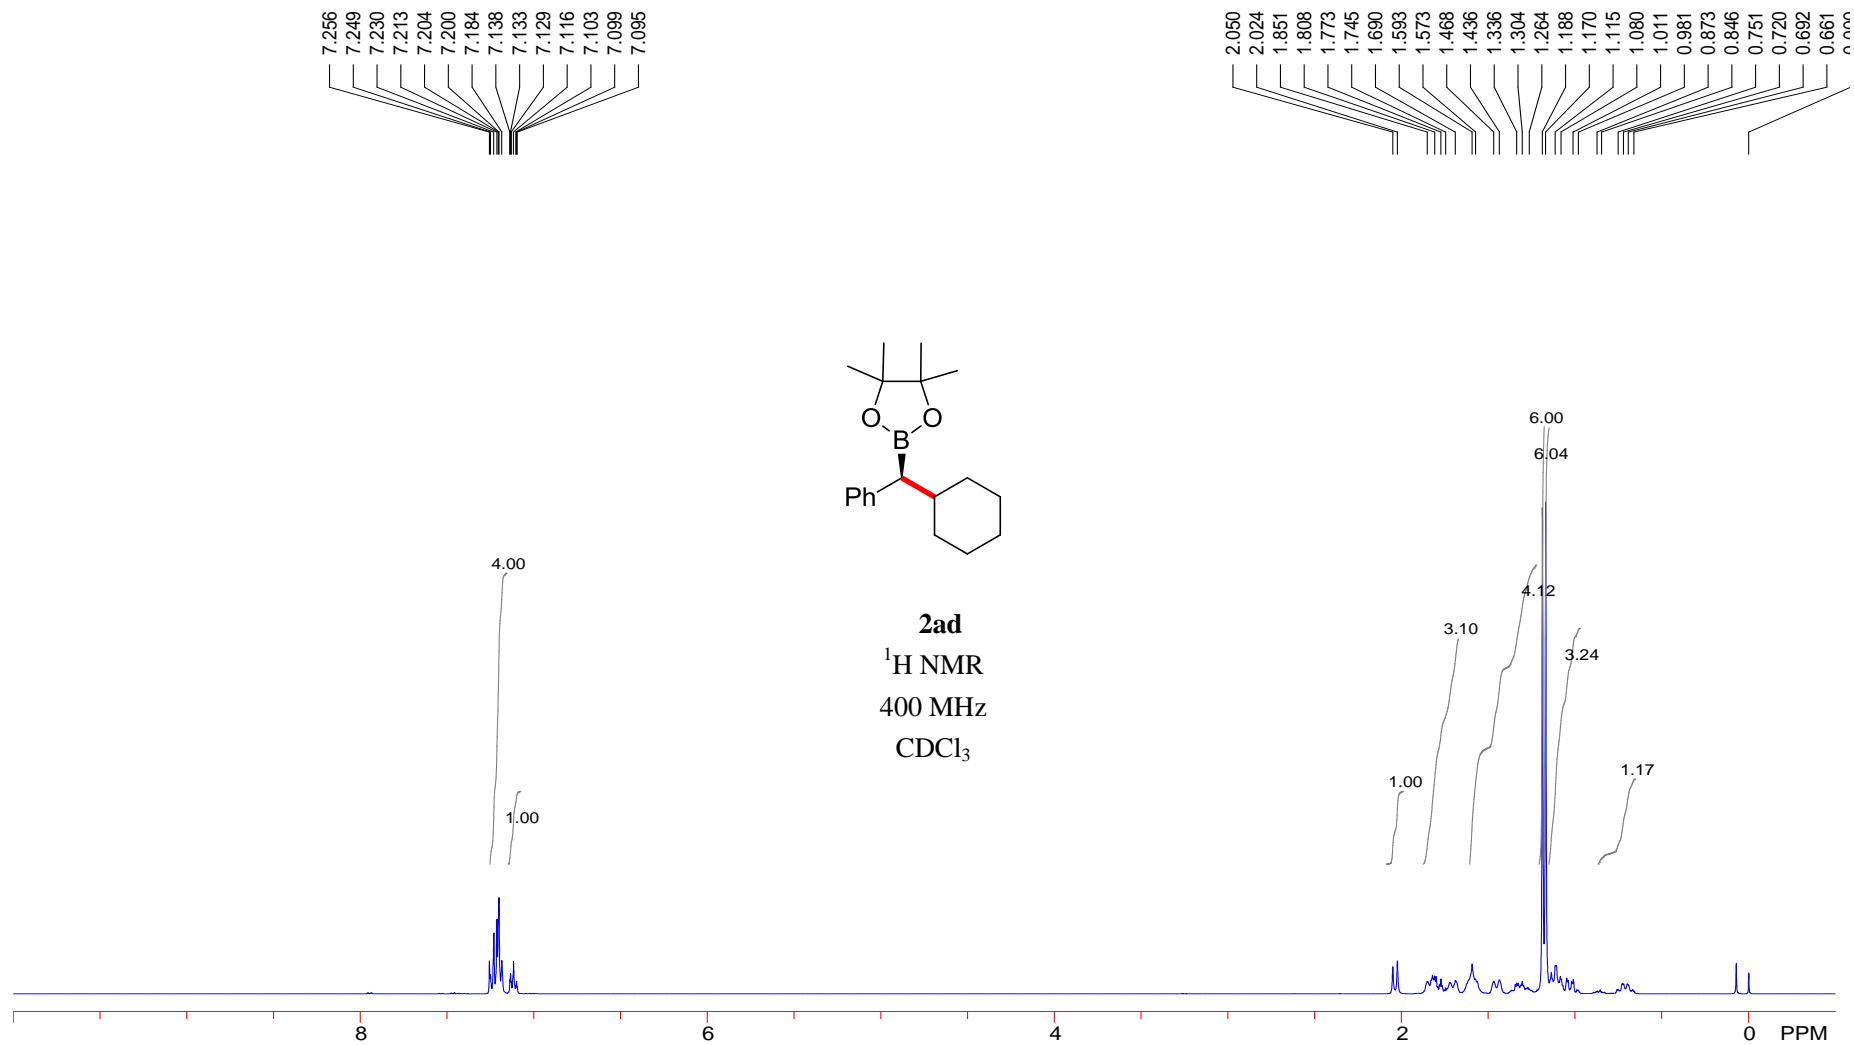

Supplementary Figure 186. <sup>1</sup>H NMR spectrum for **2ad**

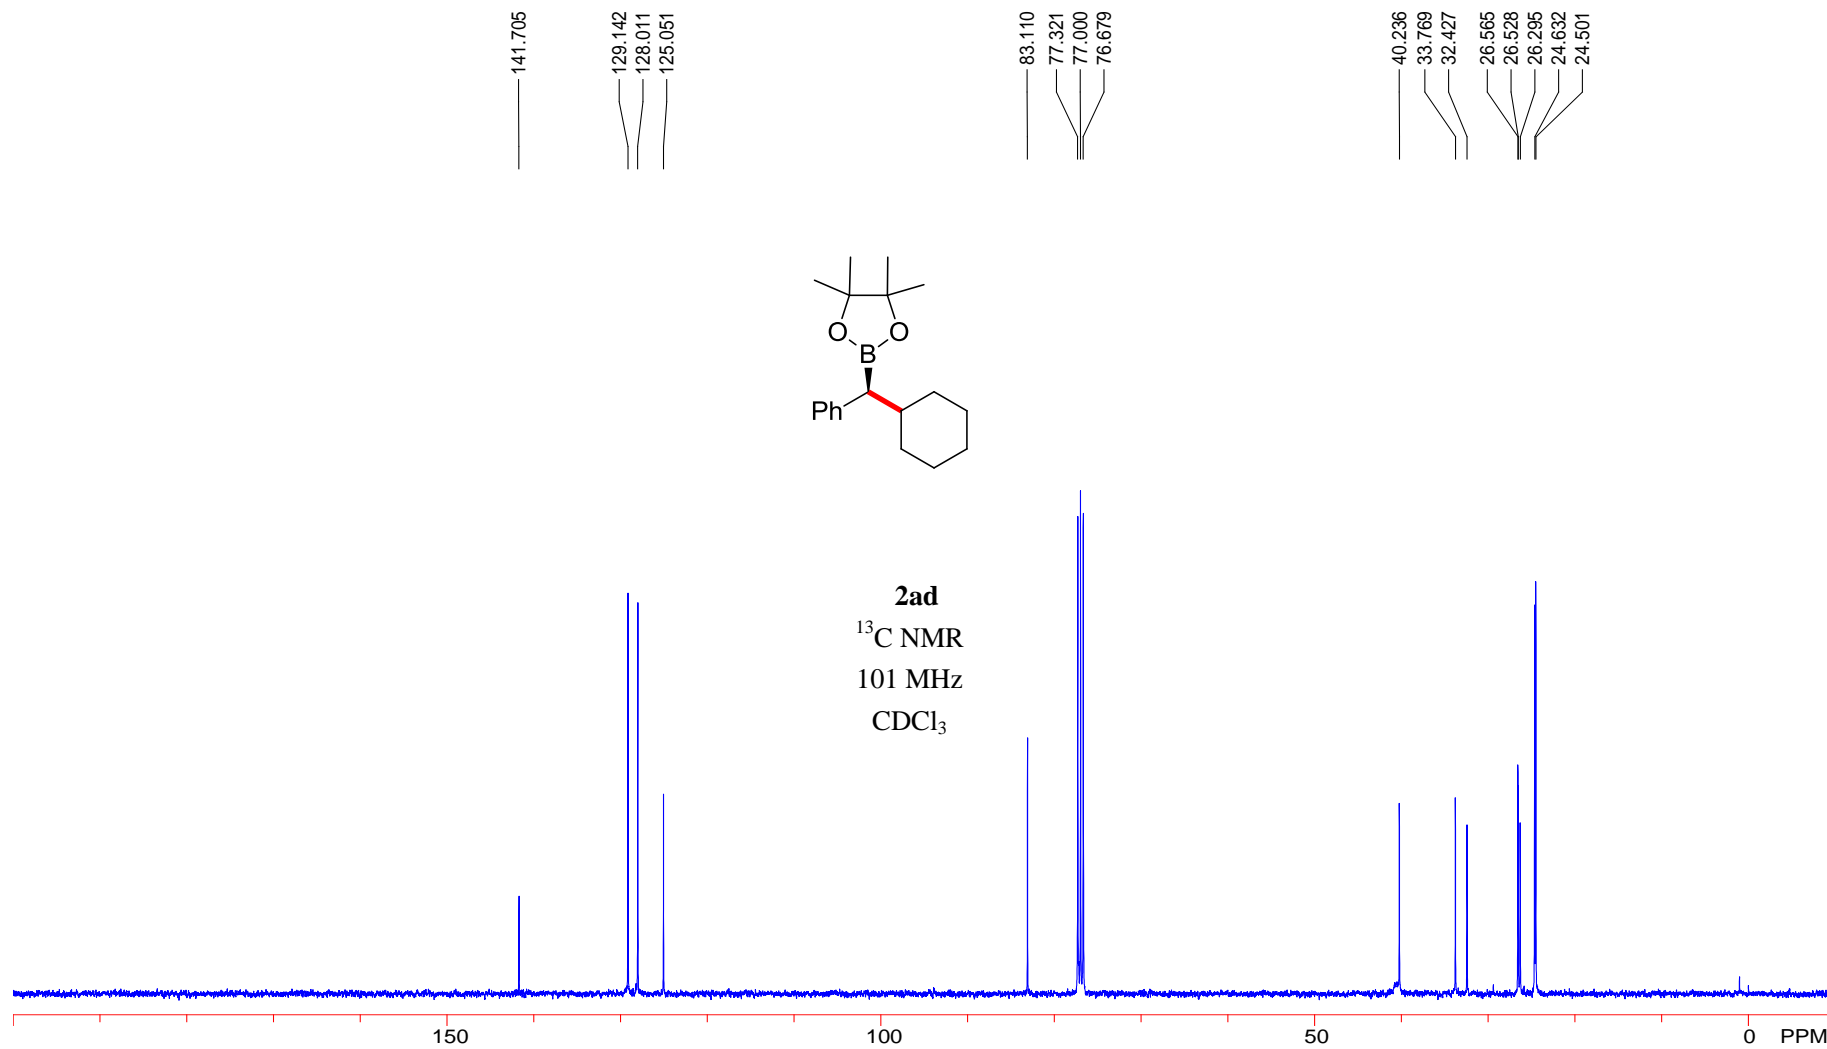

**Supplementary Figure 187.** <sup>13</sup>C NMR spectrum for **2ad**

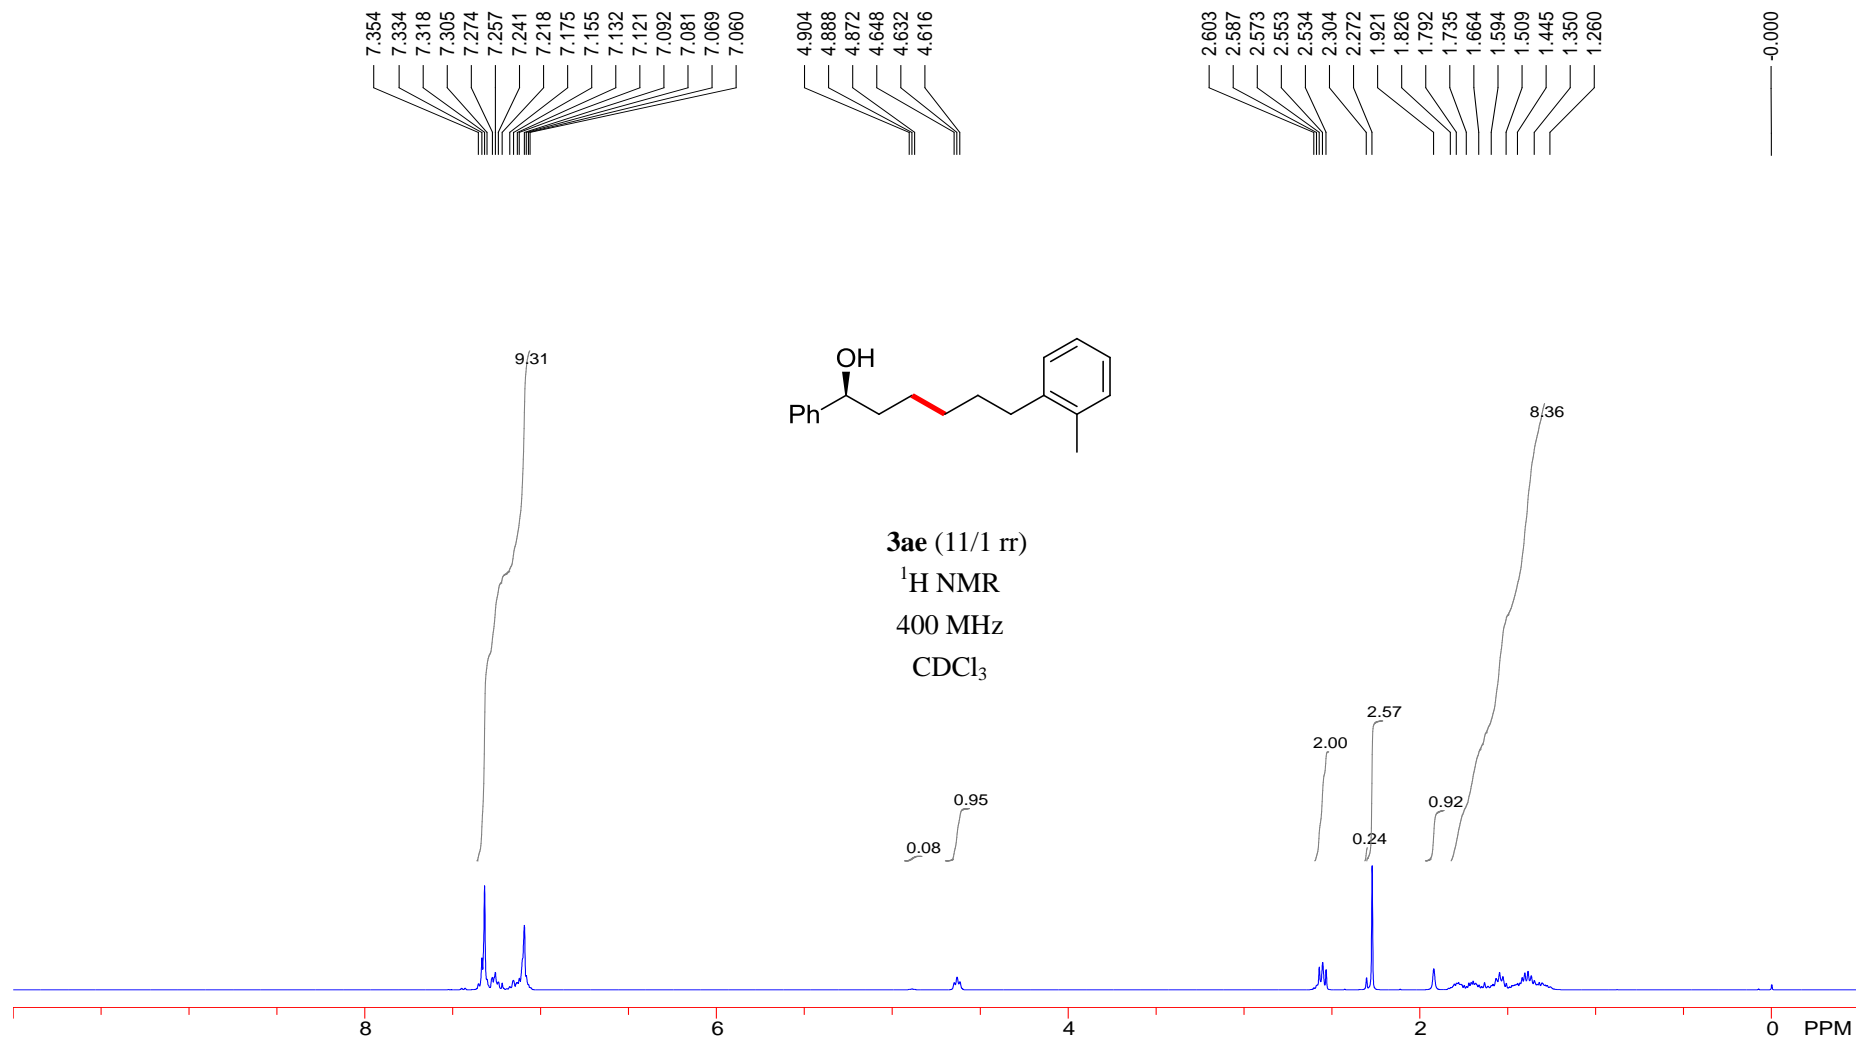

Supplementary Figure 188. <sup>1</sup>H NMR spectrum for 3ae

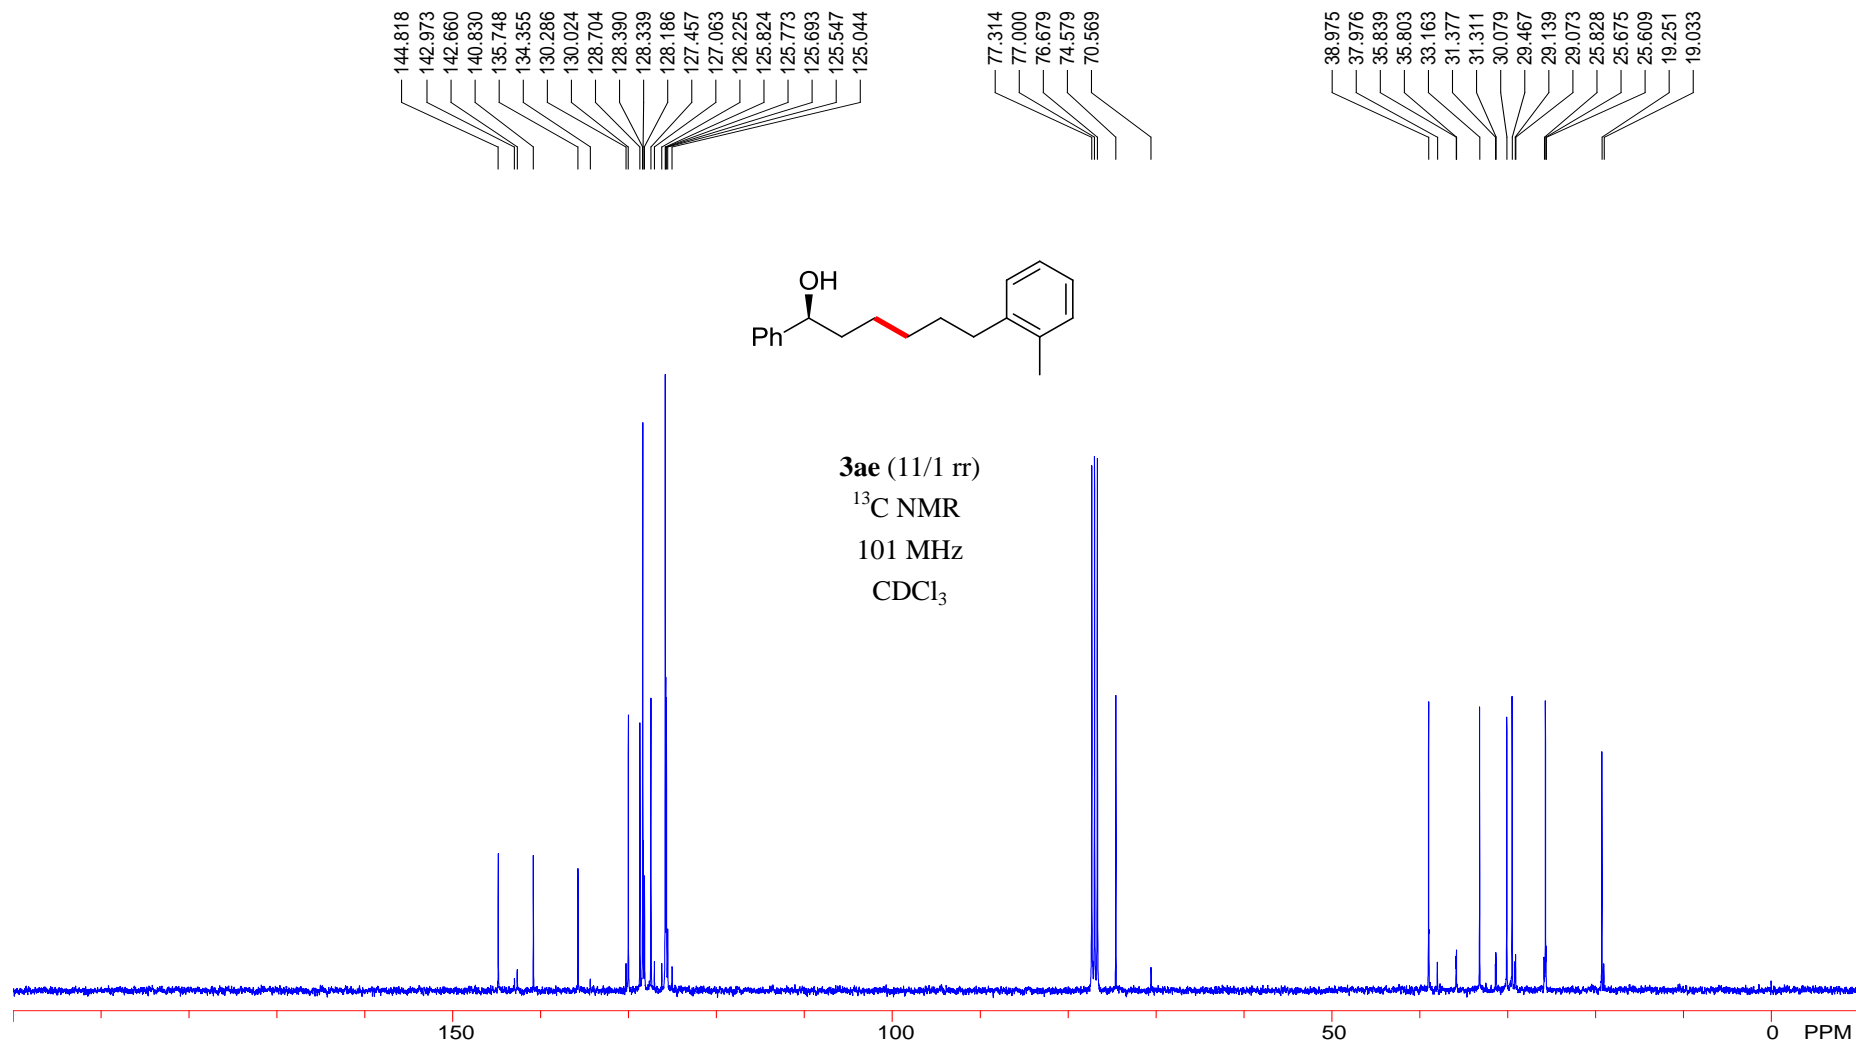

Supplementary Figure 189. <sup>13</sup>C NMR spectrum for **3ae**

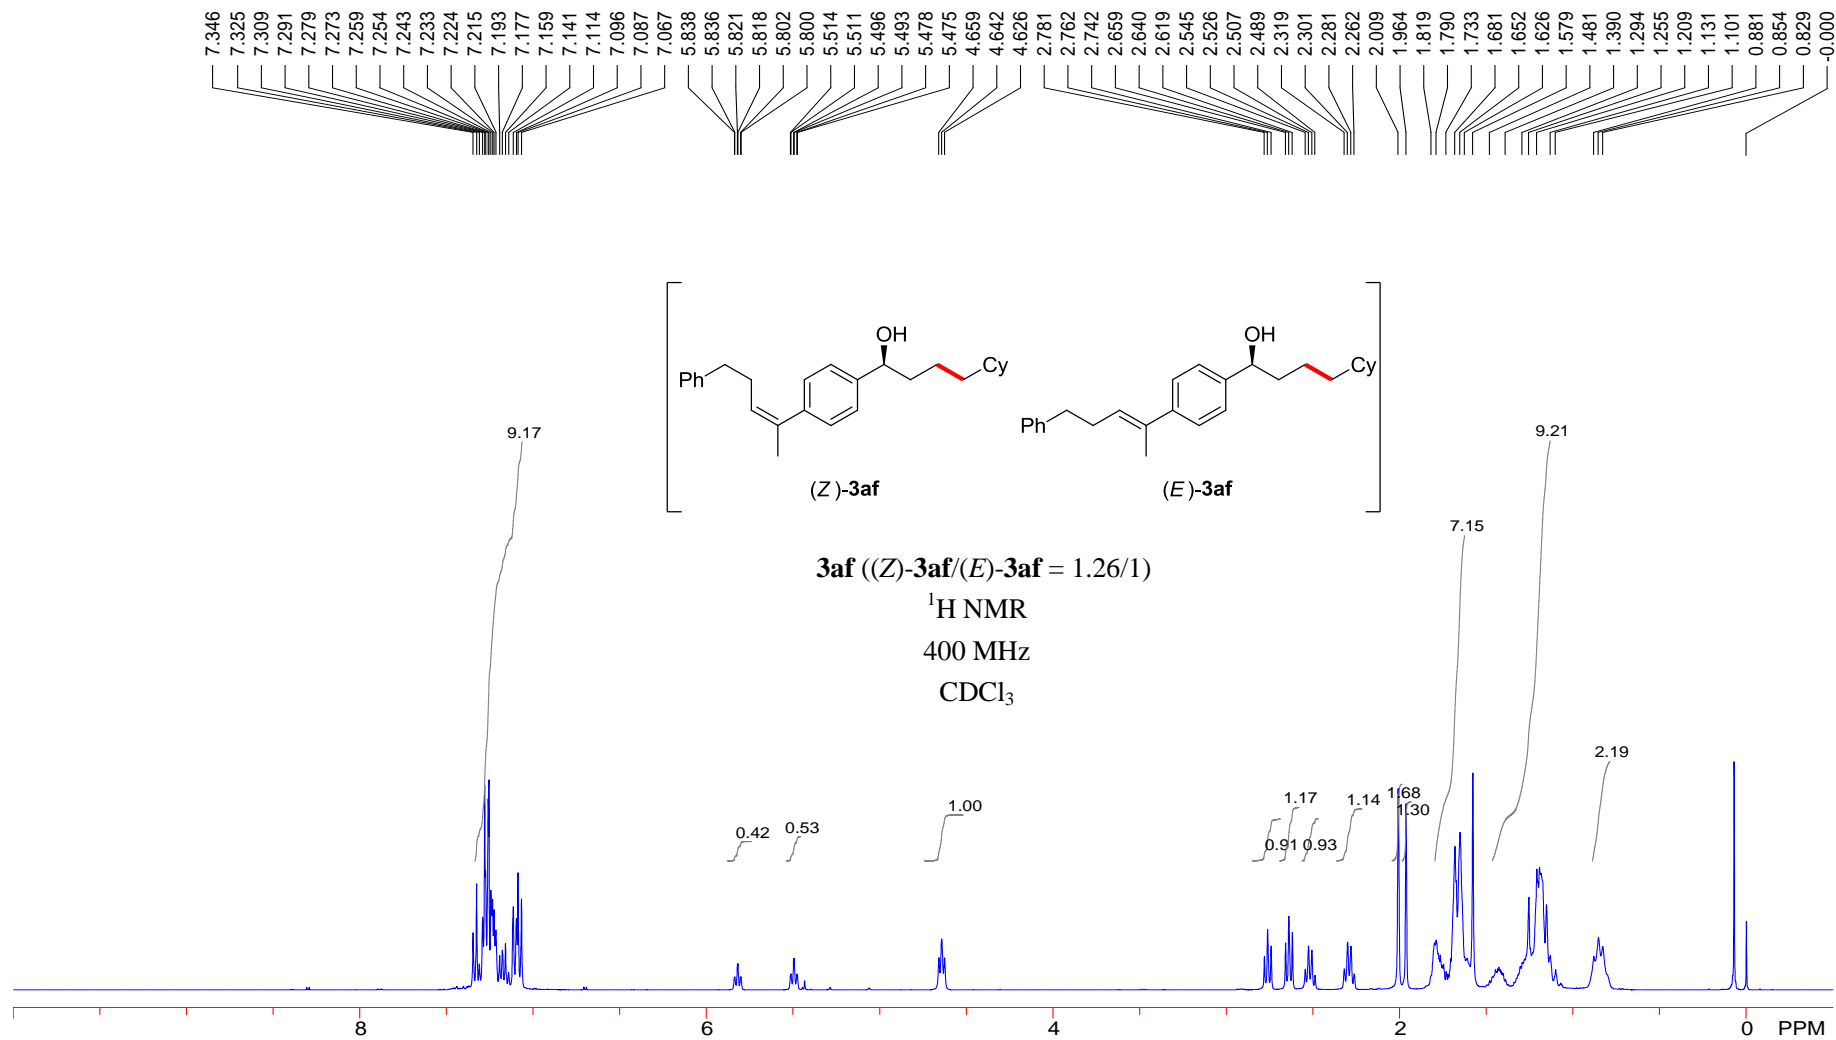

Supplementary Figure 190. <sup>1</sup>H NMR spectrum for 3af

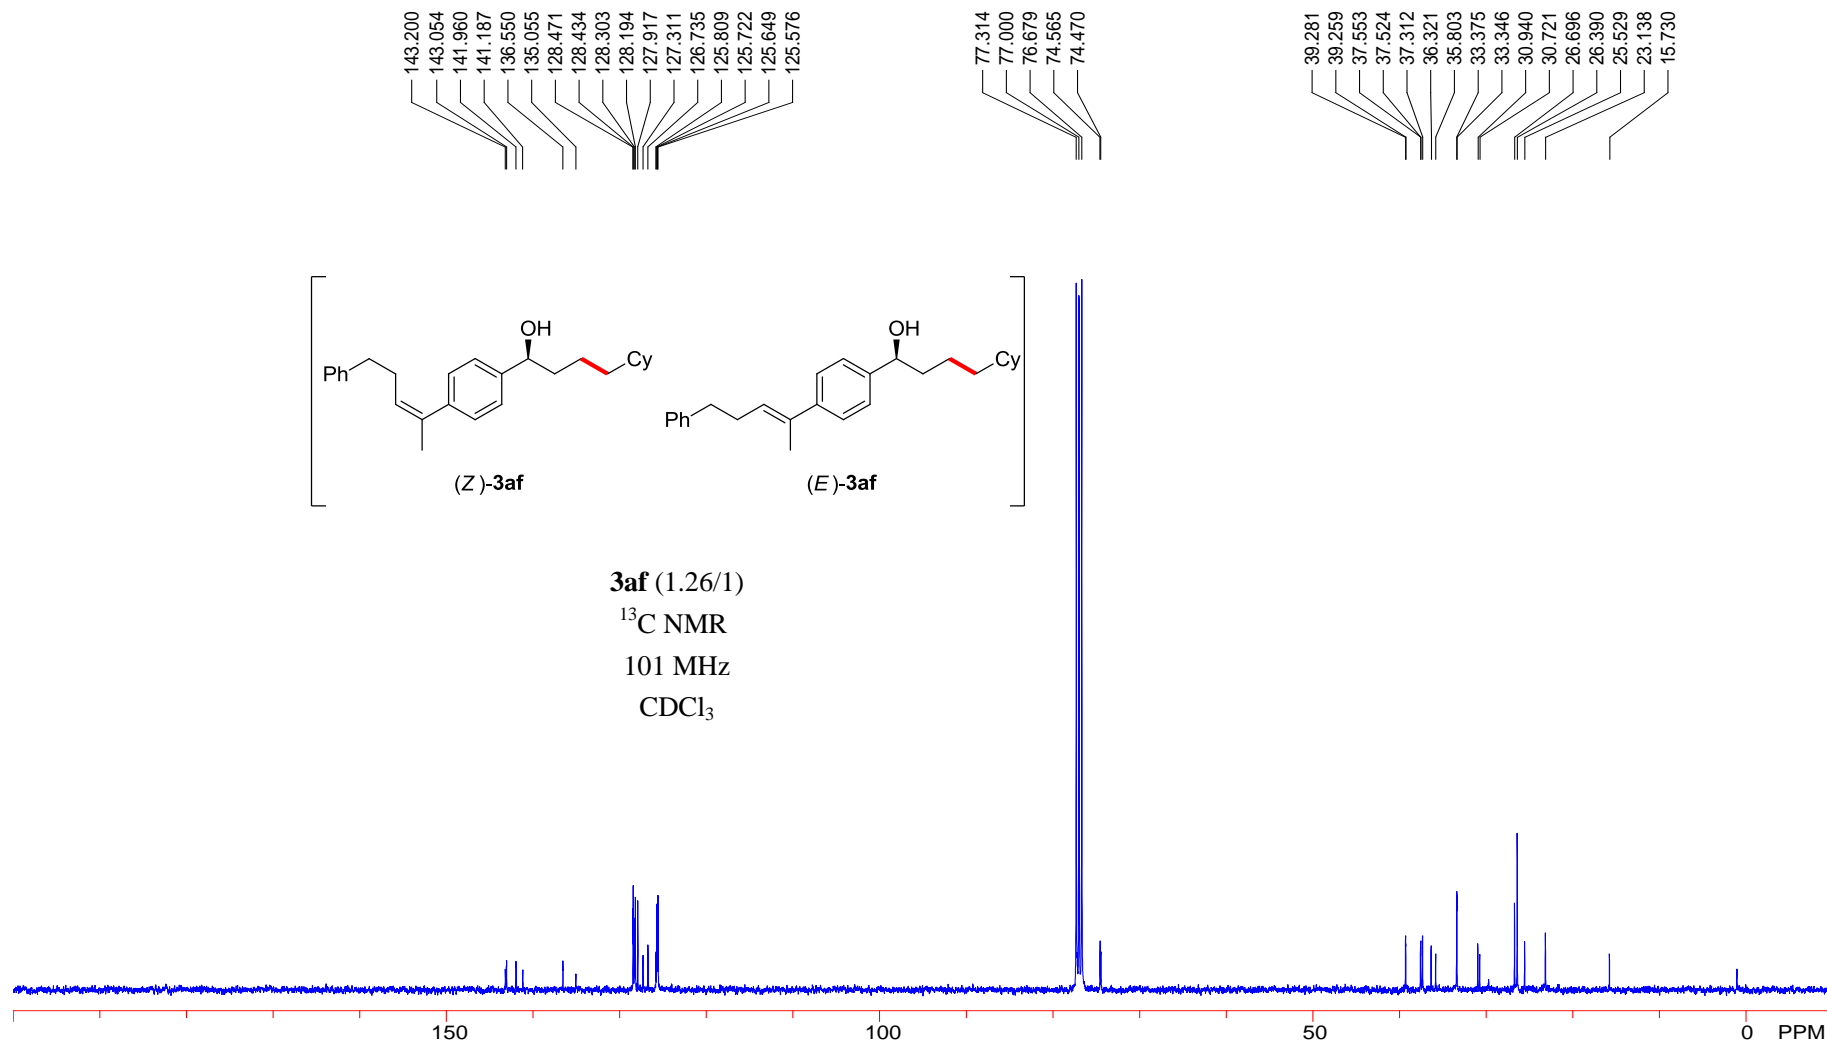

Supplementary Figure 191. <sup>13</sup>C NMR spectrum for 3af



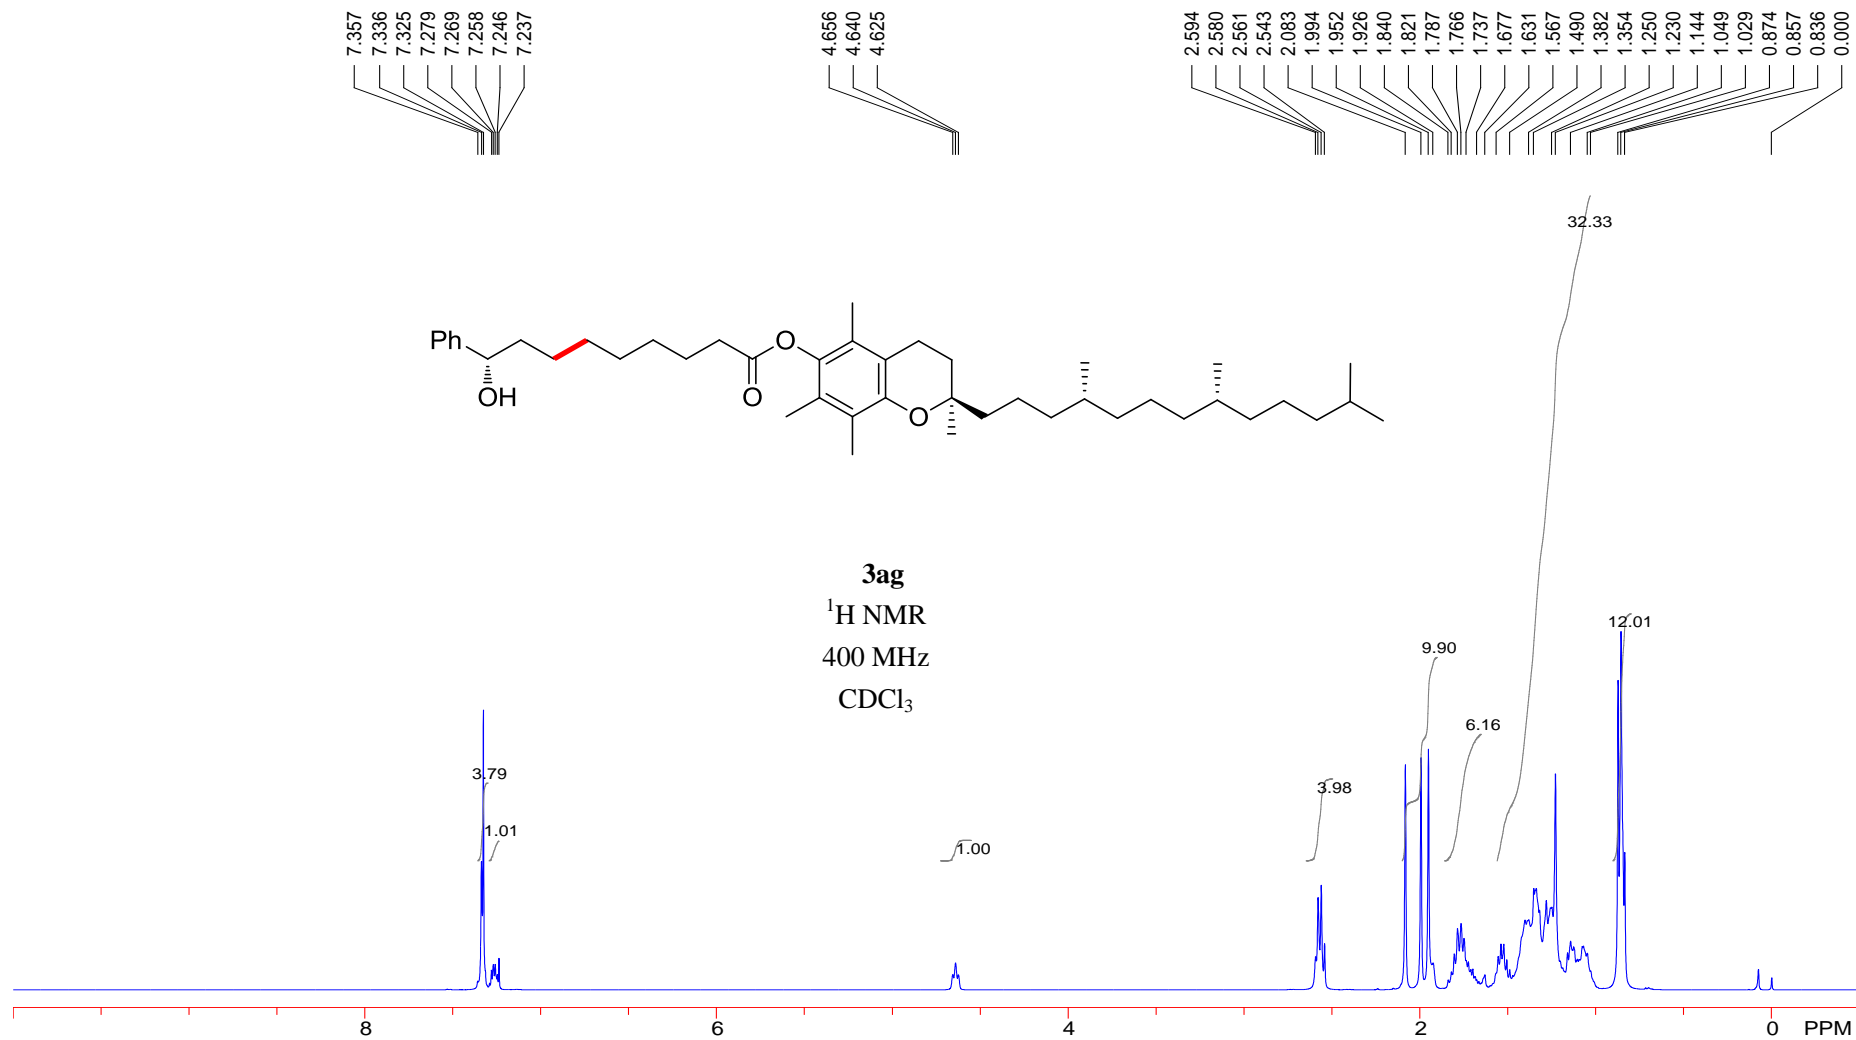

Supplementary Figure 192.  $^1\text{H NMR}$  spectrum for **3ag**

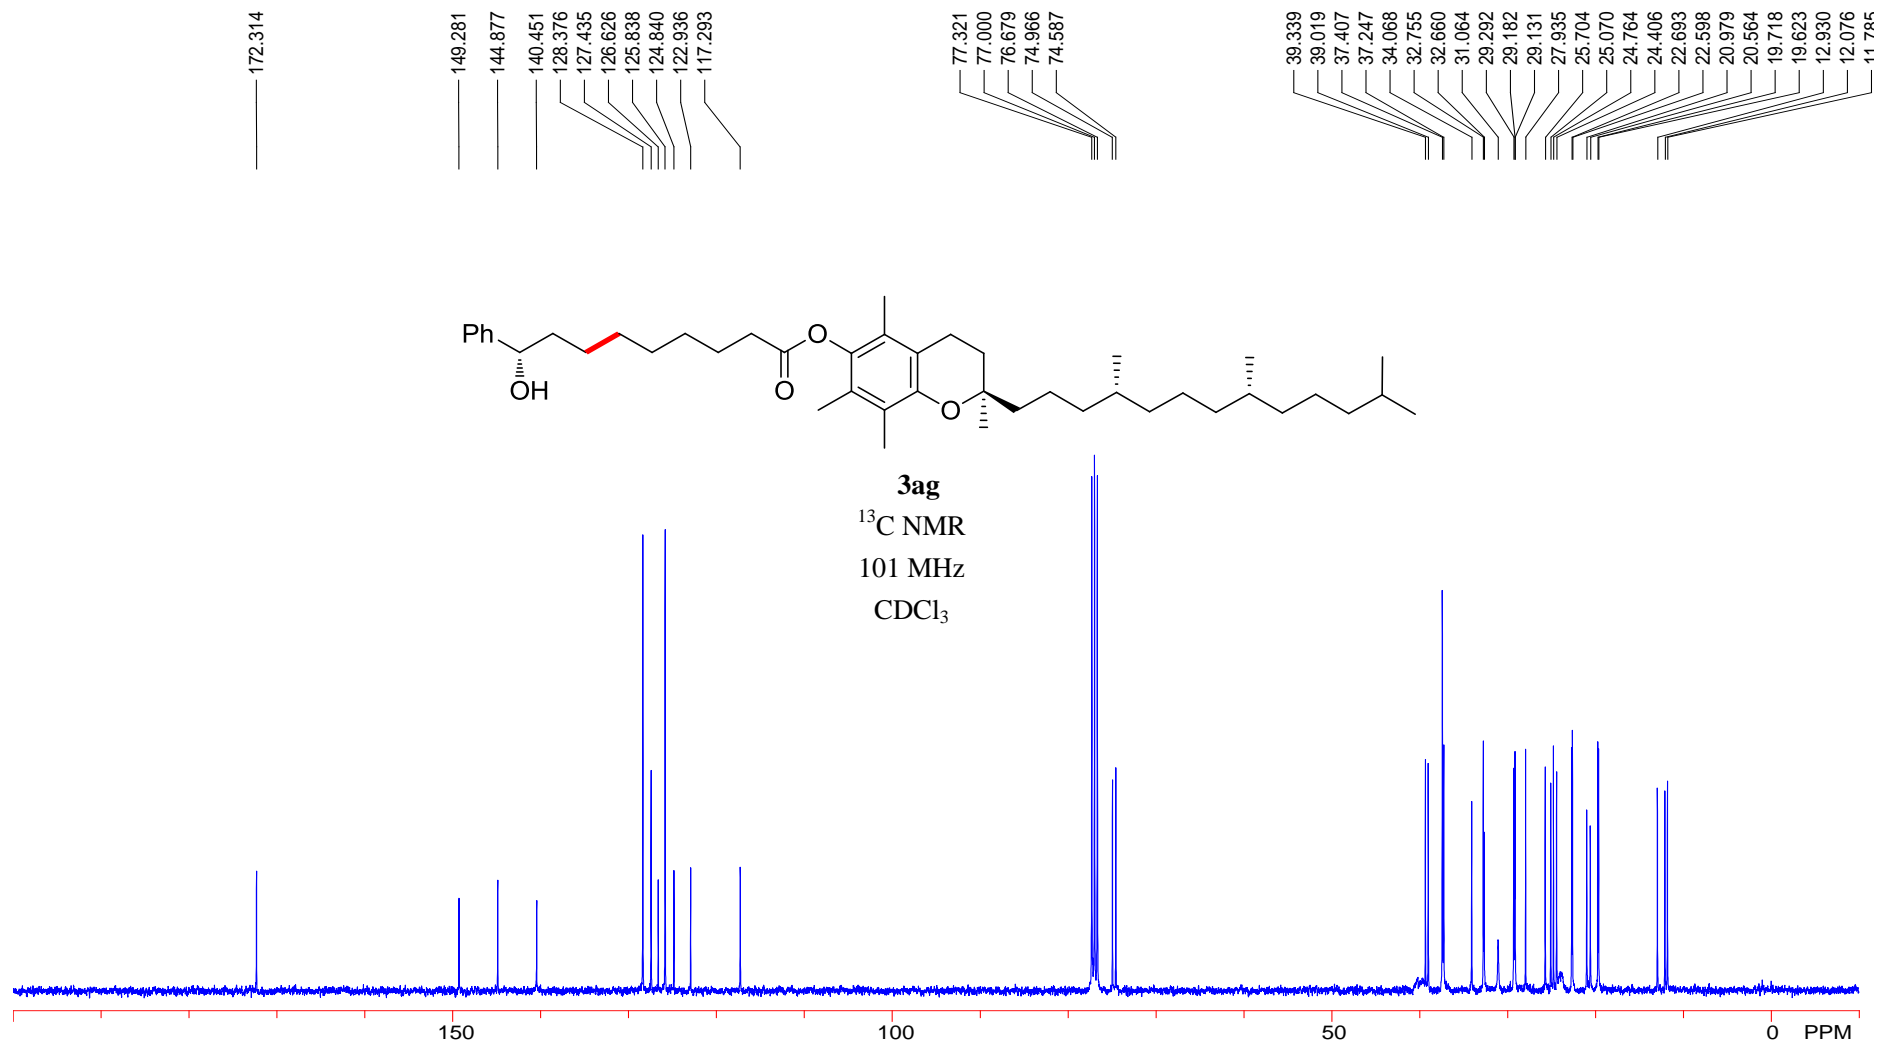

Supplementary Figure 193.  $^{13}\text{C}$  NMR spectrum for **3ag**

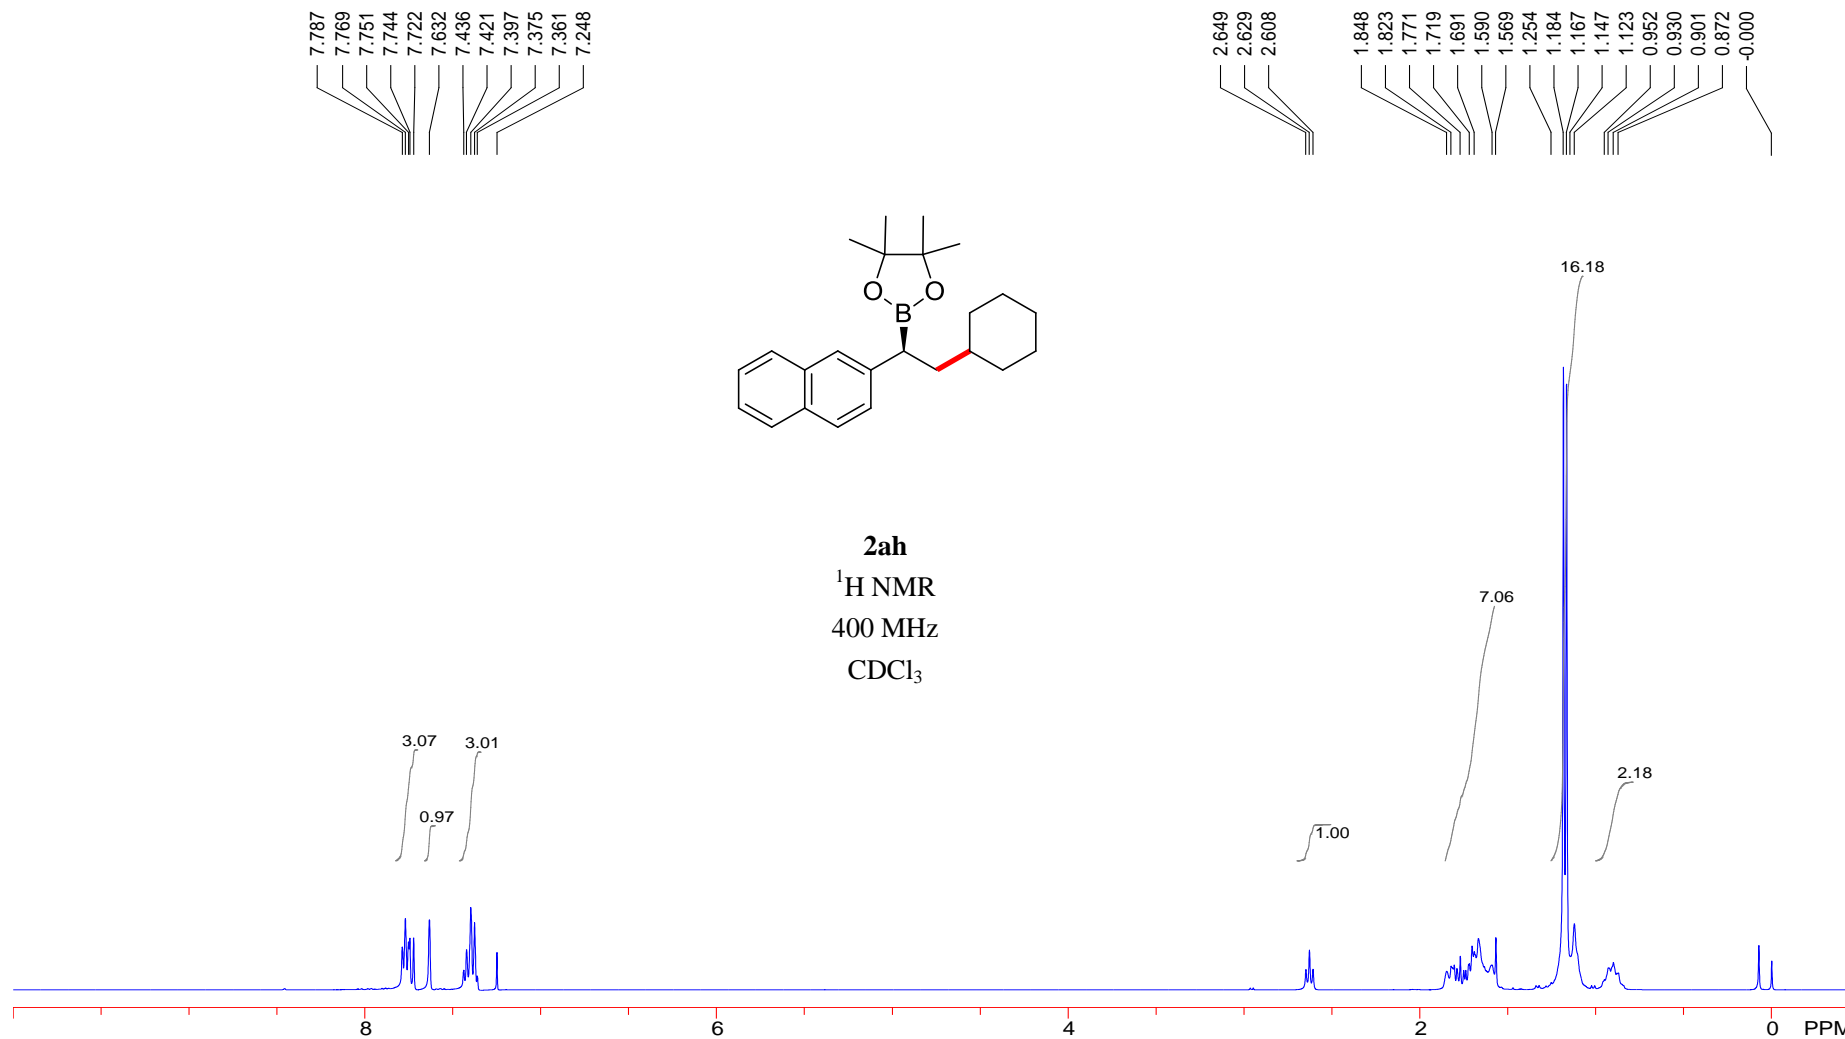

Supplementary Figure 194.  $^1\text{H NMR}$  spectrum for **2ah**

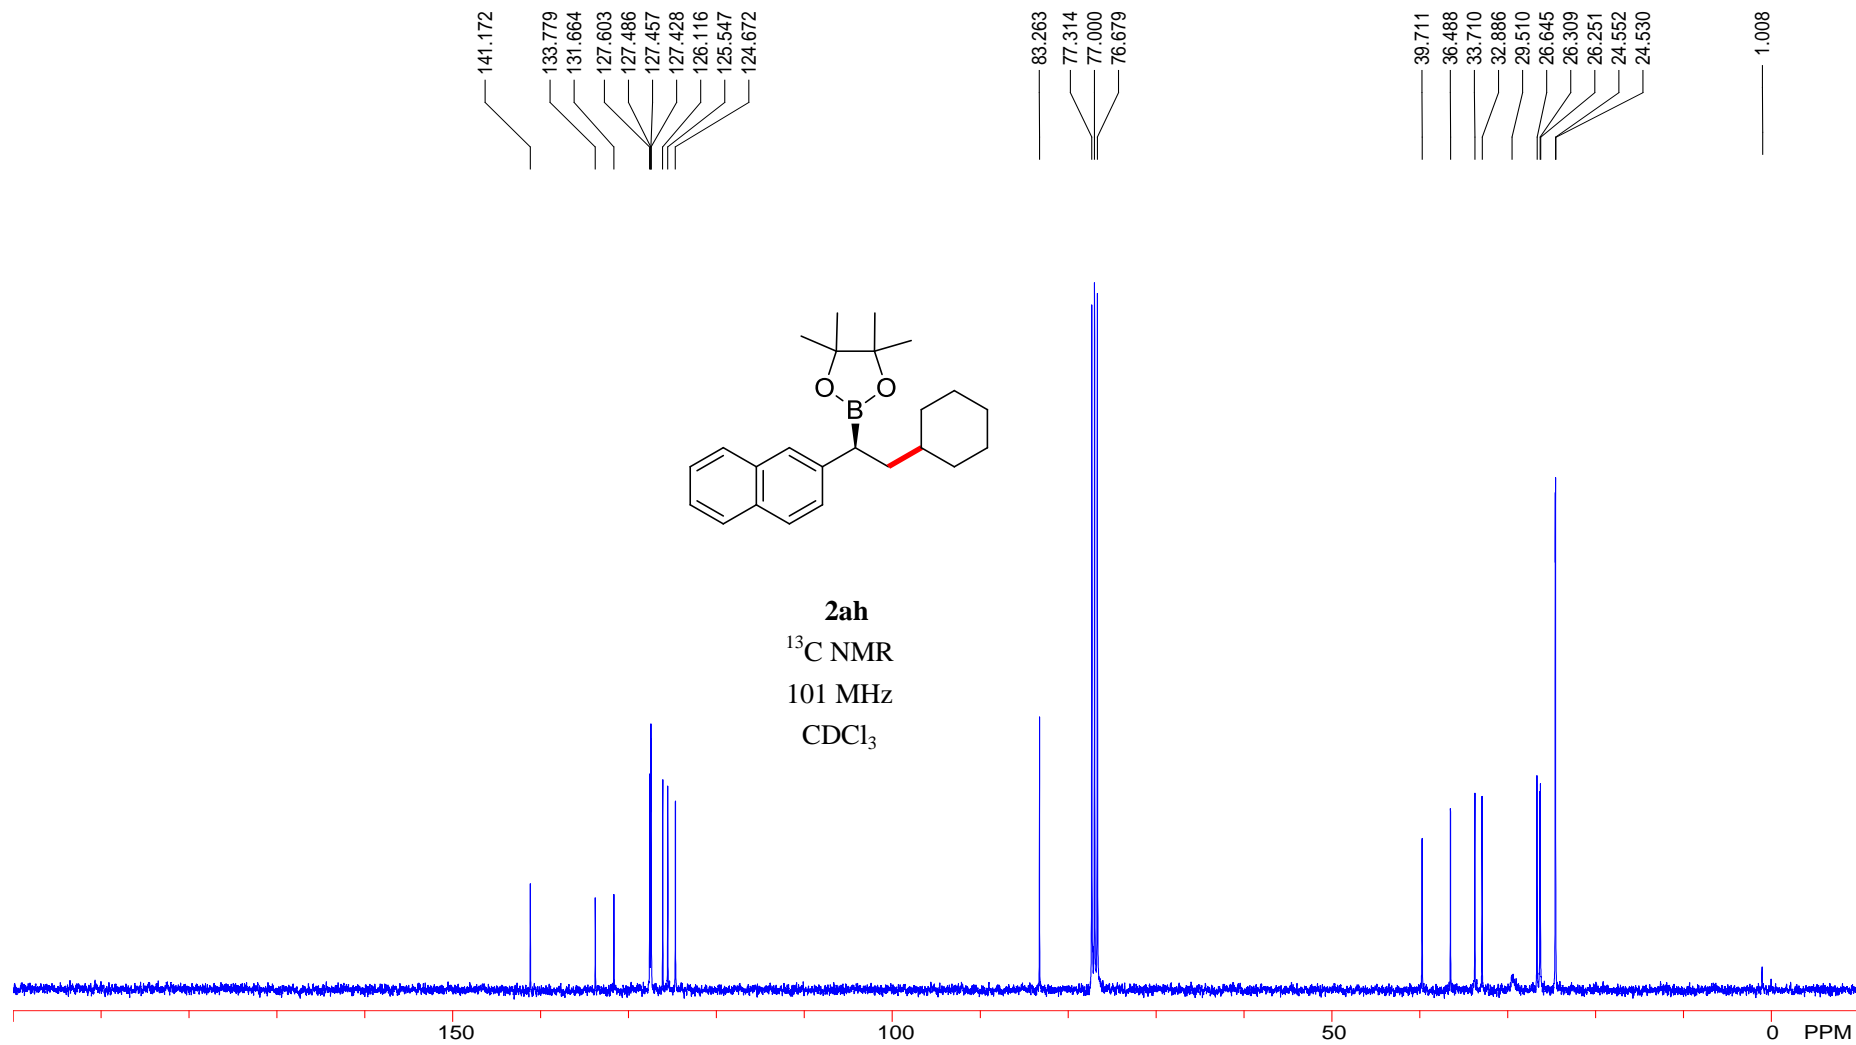

**Supplementary Figure 195.** <sup>13</sup>C NMR spectrum for **2ah**

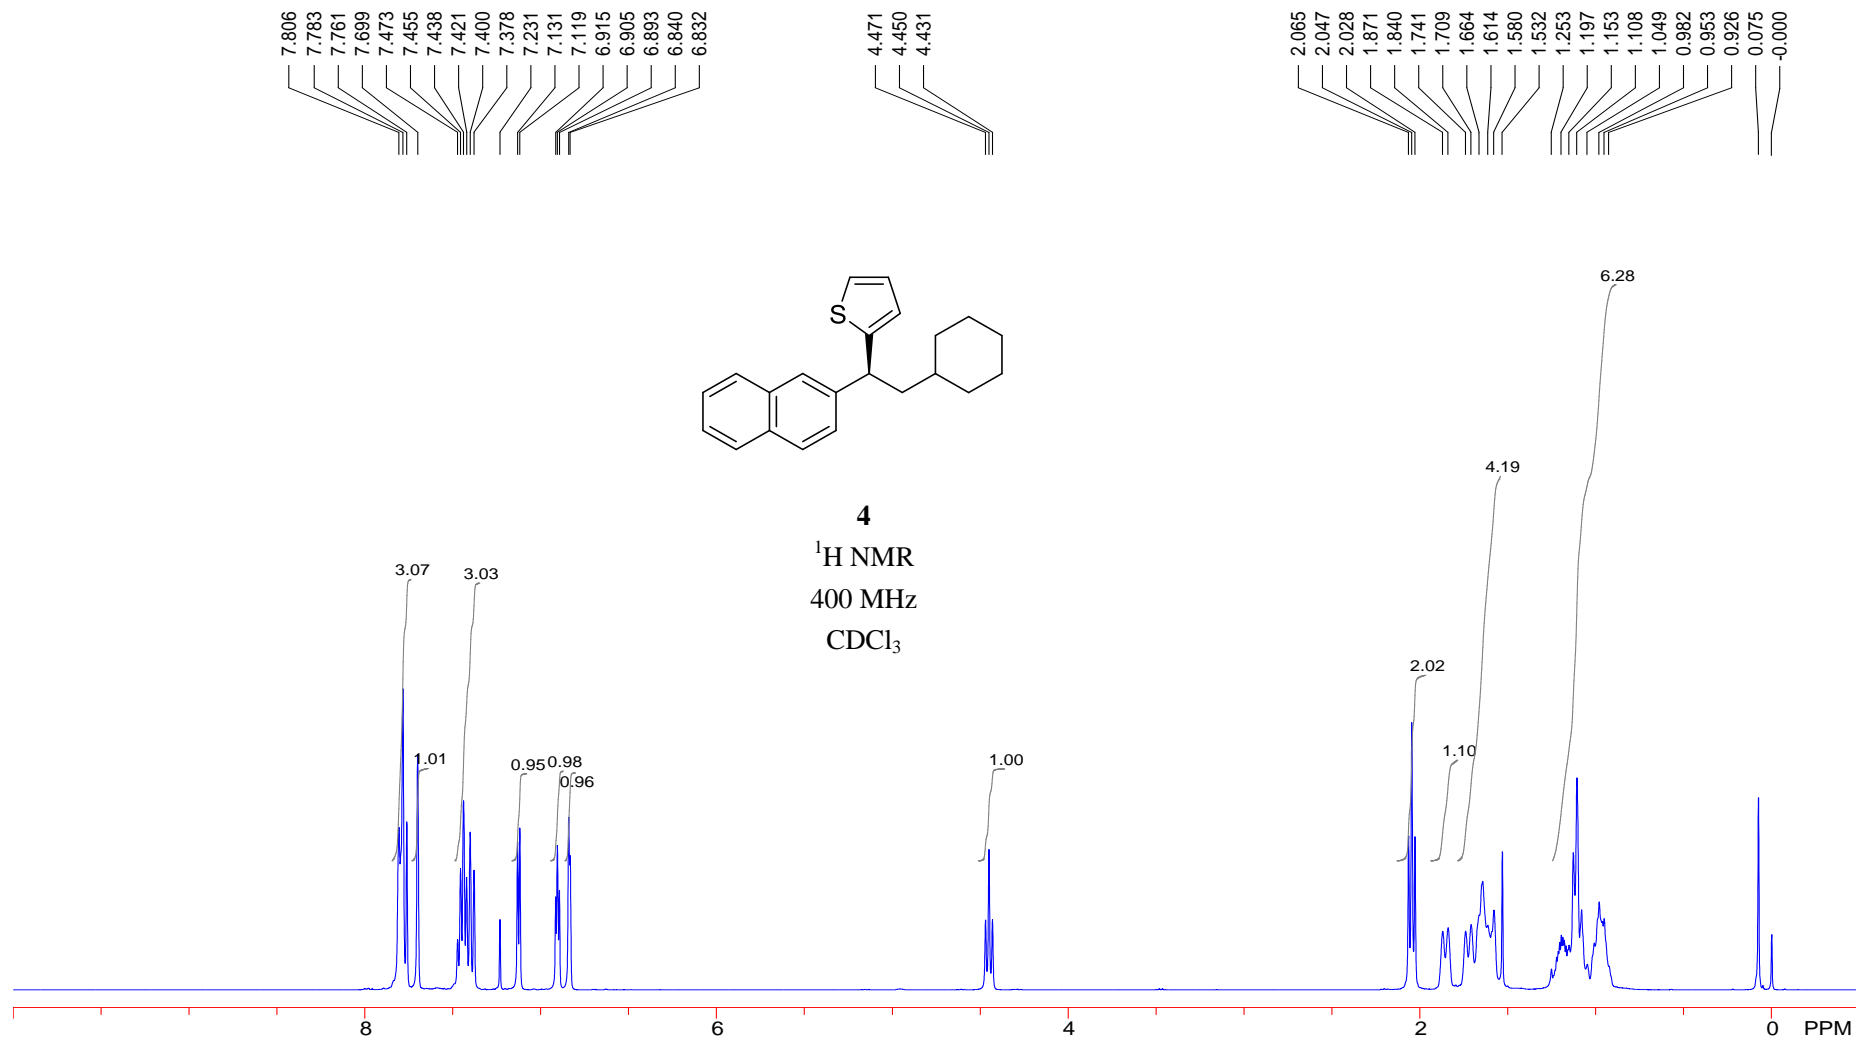

Supplementary Figure 196.  $^1\text{H NMR}$  spectrum for **4**

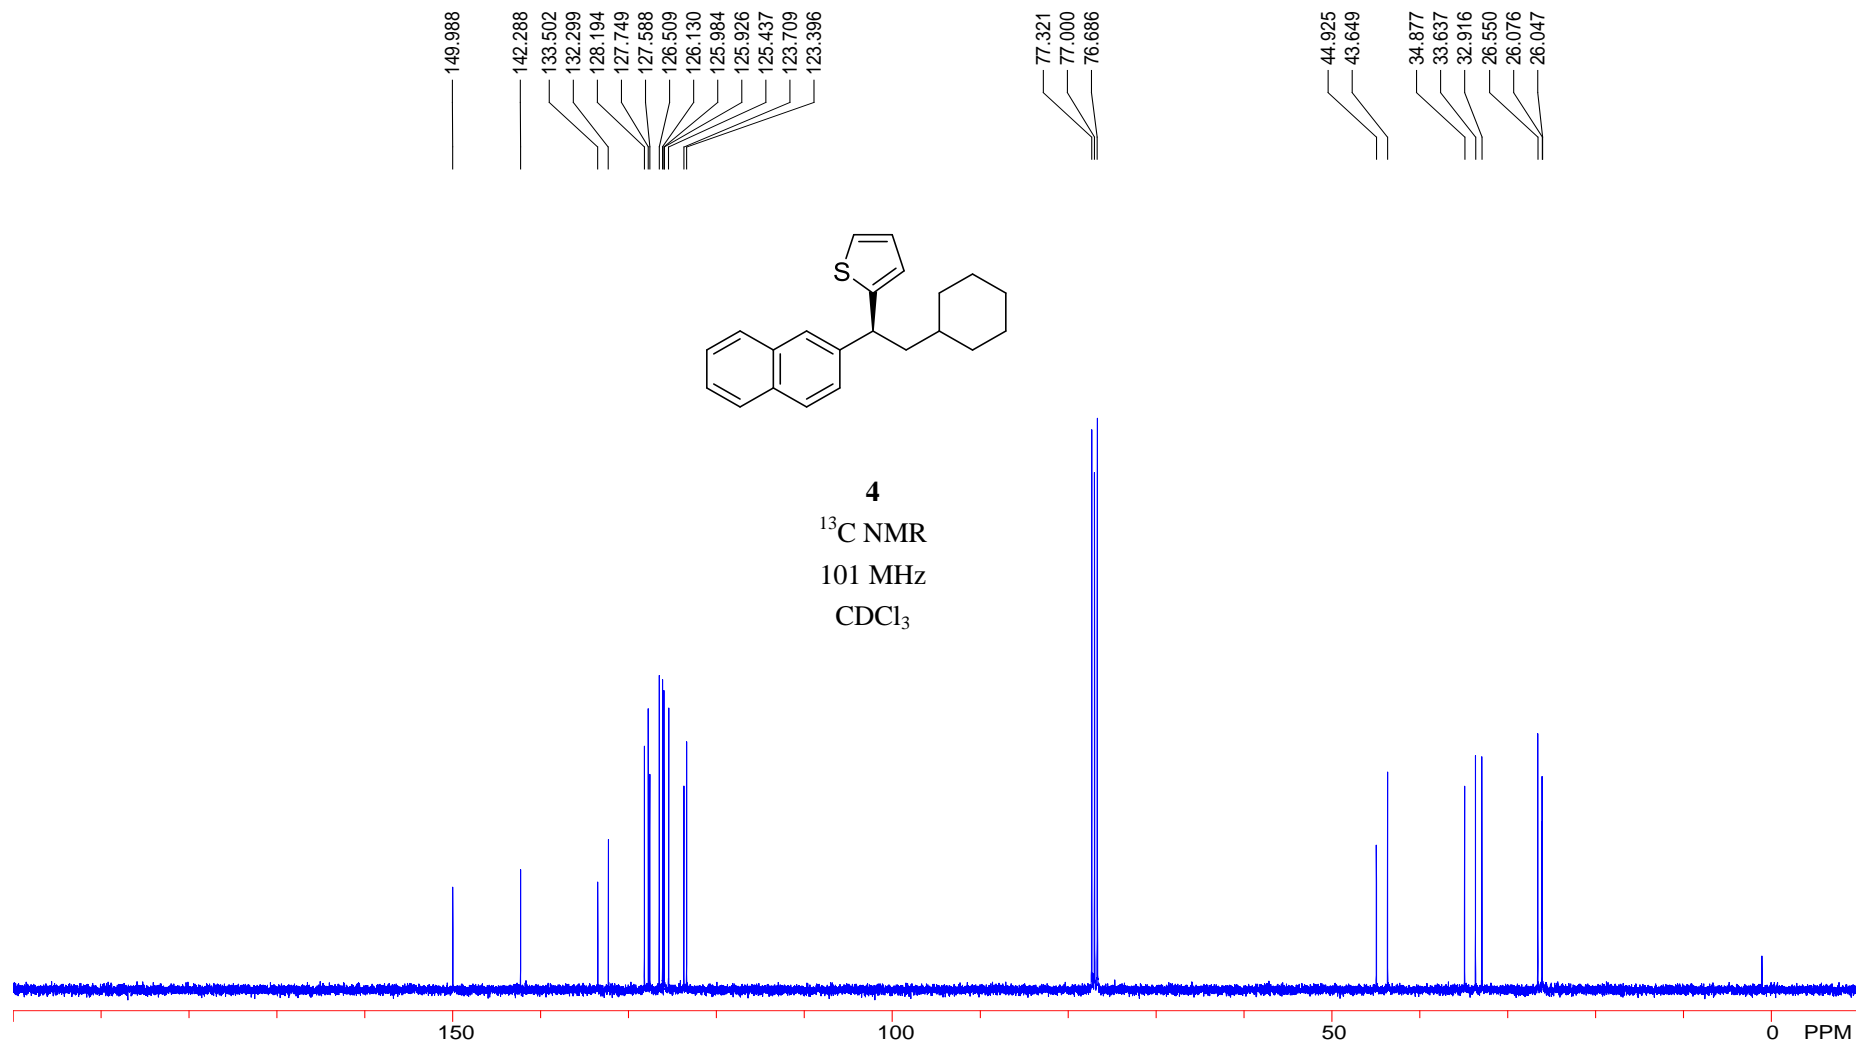

Supplementary Figure 197.  $^{13}\text{C}$  NMR spectrum for **4**

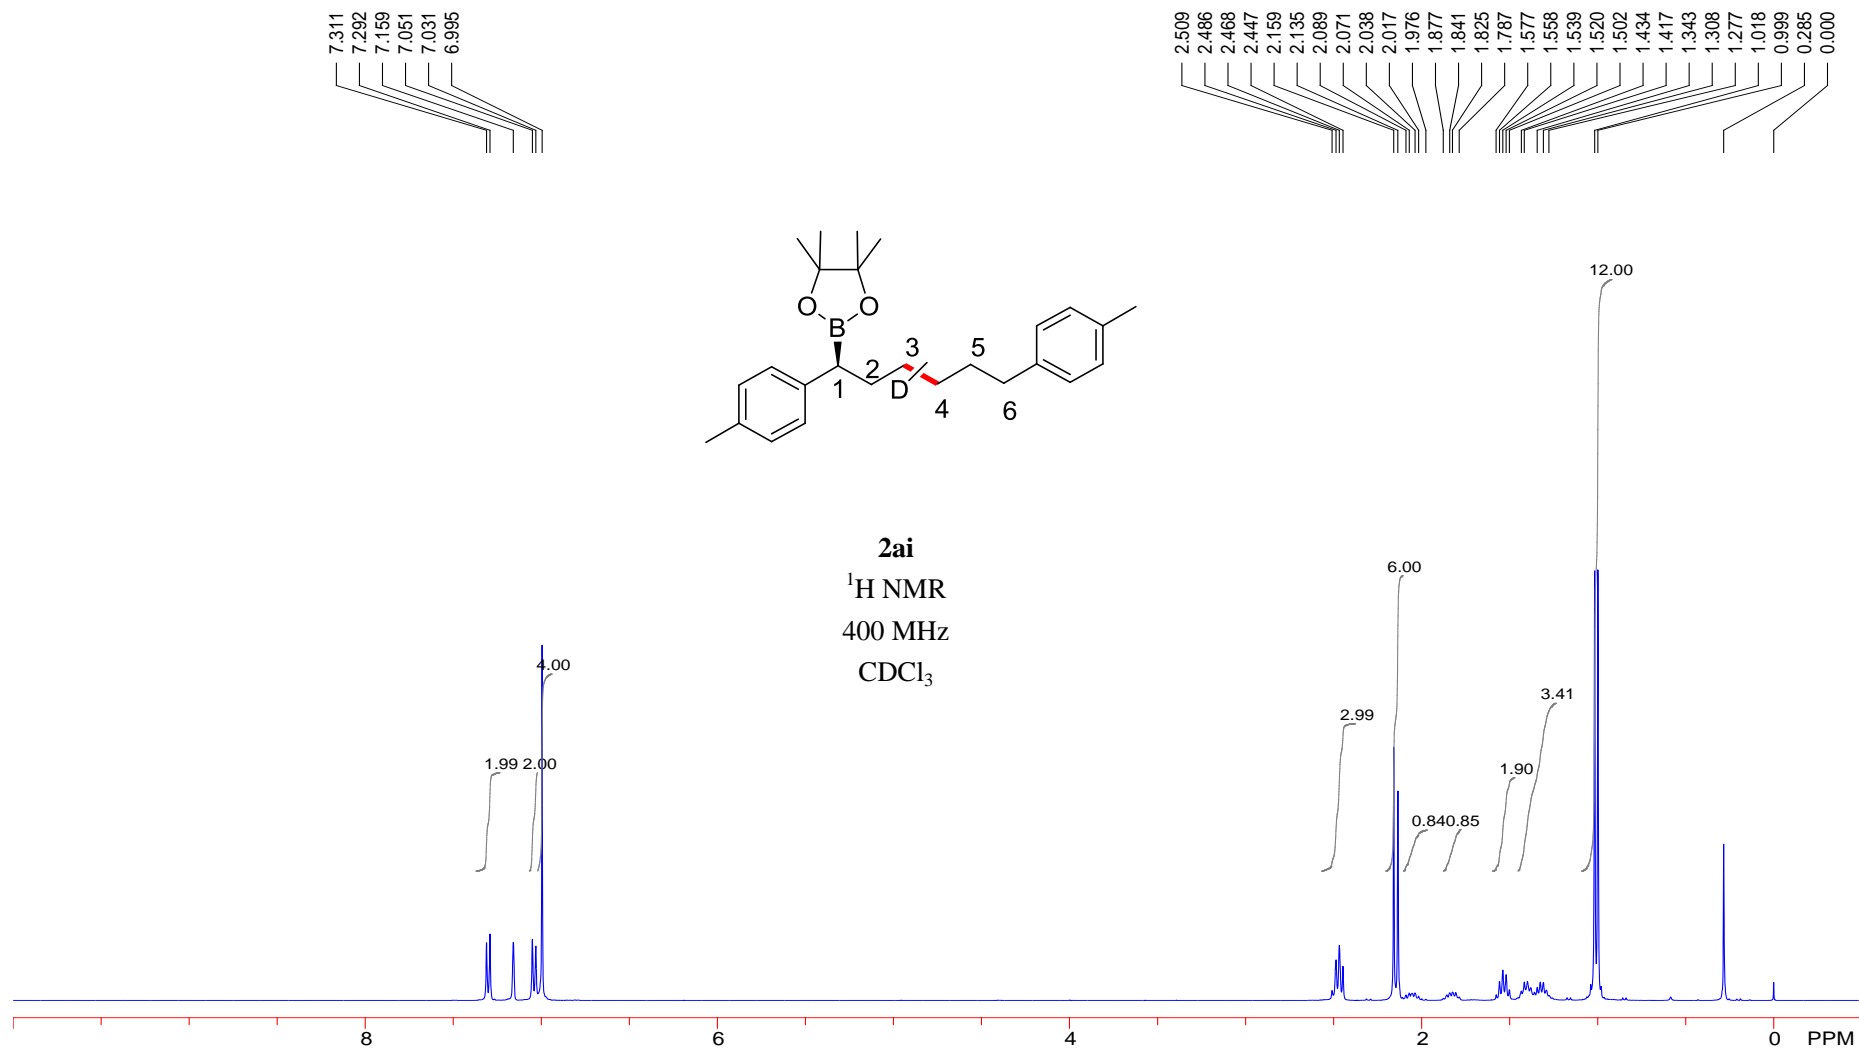

Supplementary Figure 198. <sup>1</sup>H NMR spectrum for **2ai**

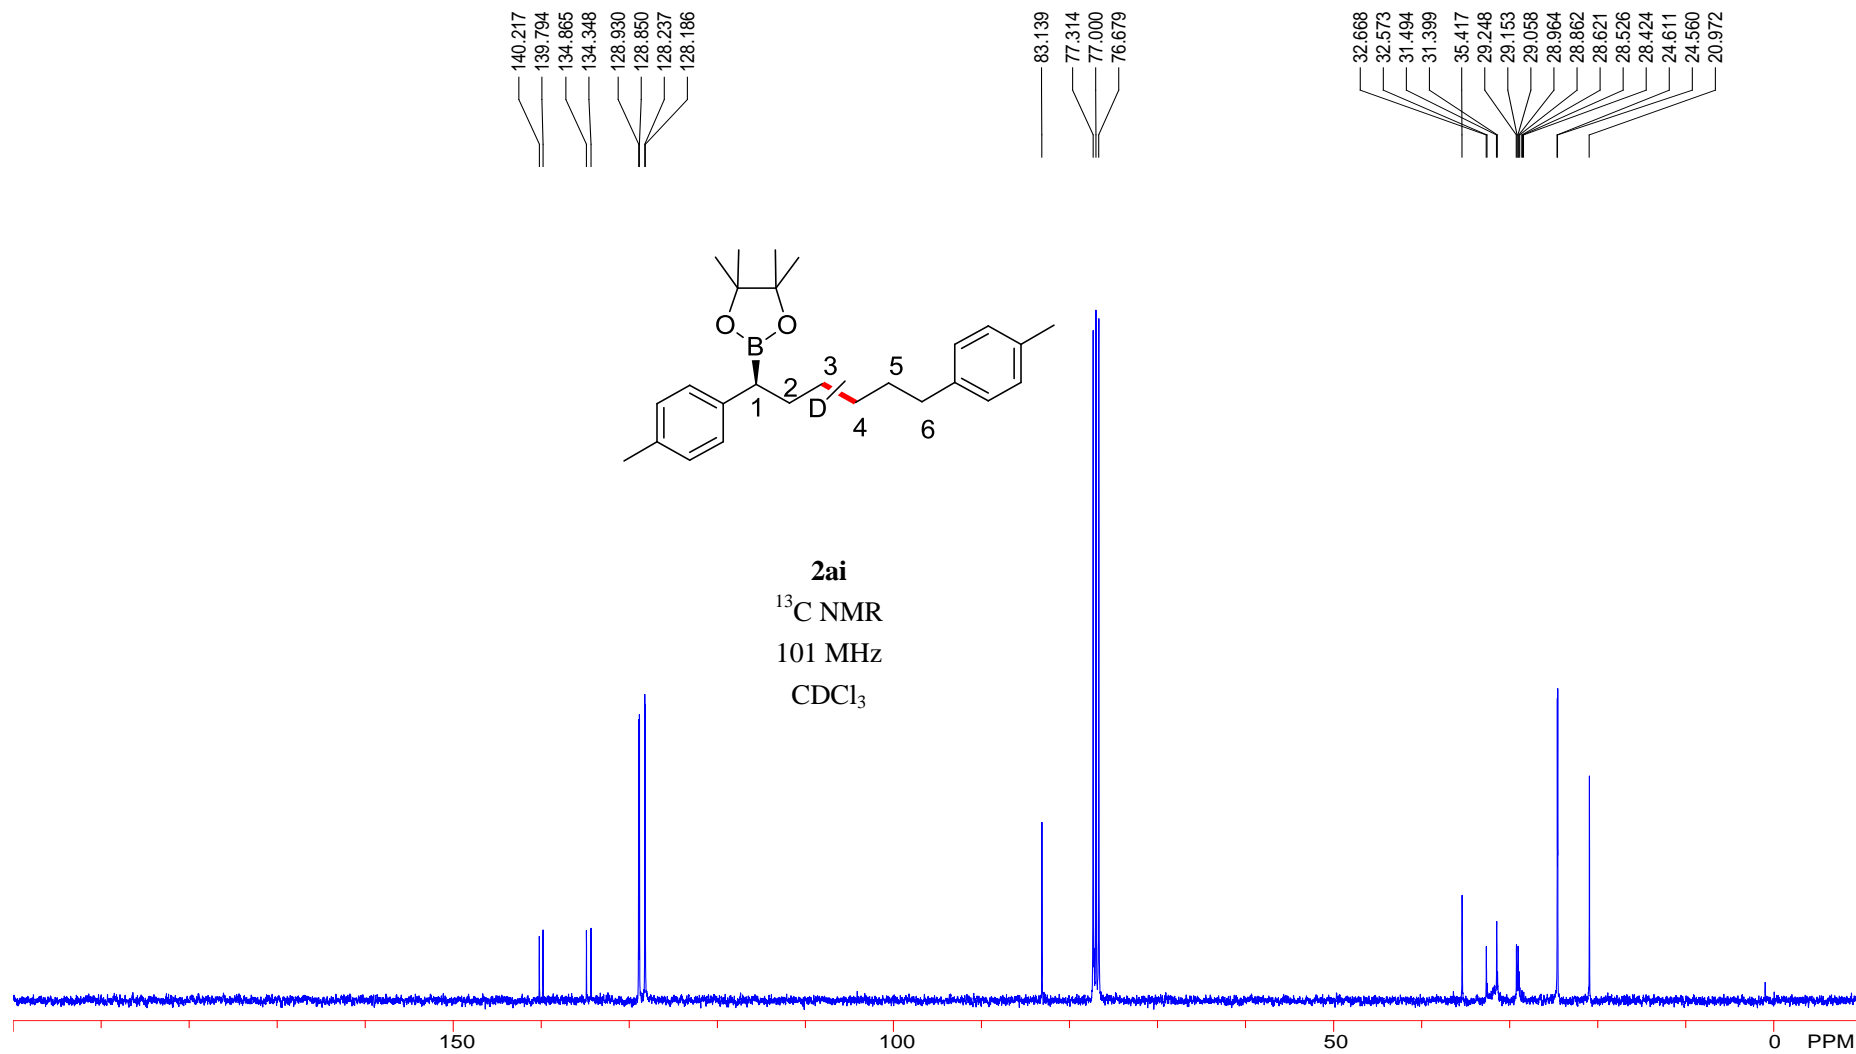

Supplementary Figure 199.  $^{13}\text{C}$  NMR spectrum for **2ai**



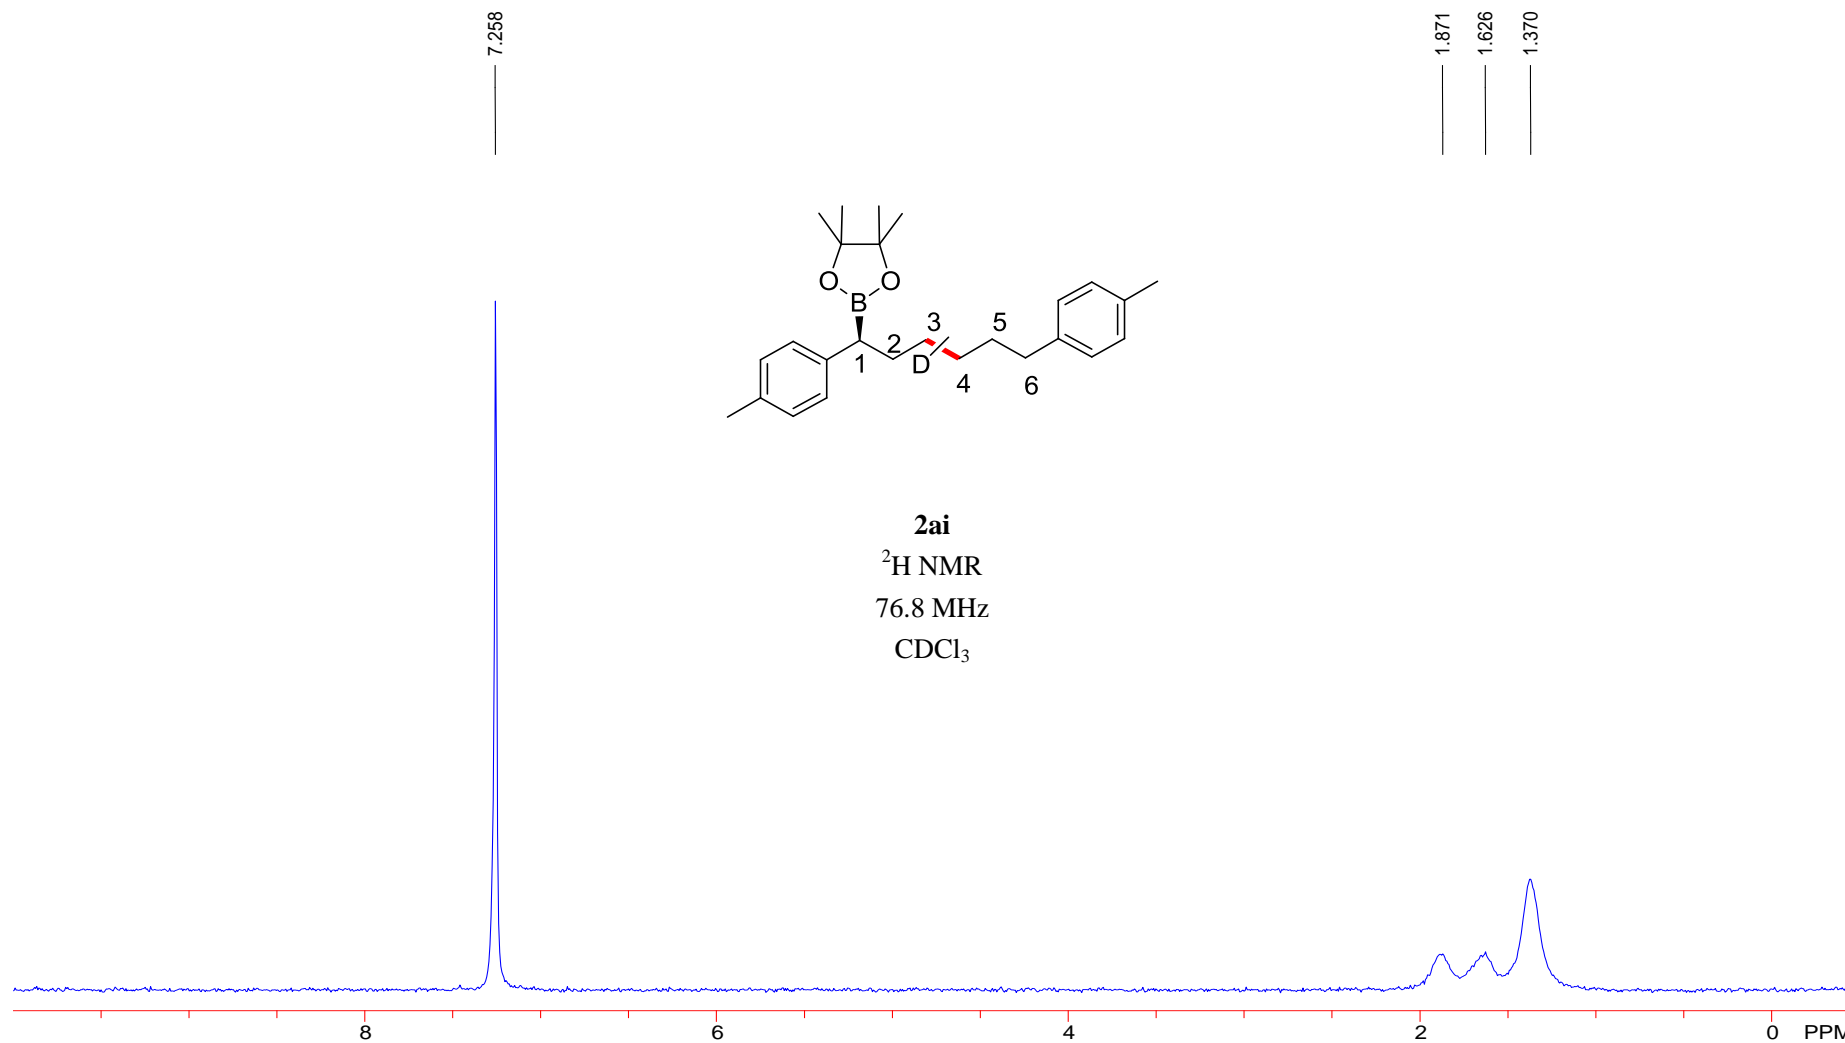

**Supplementary Figure 200.** <sup>2</sup>H NMR spectrum for **2ai**

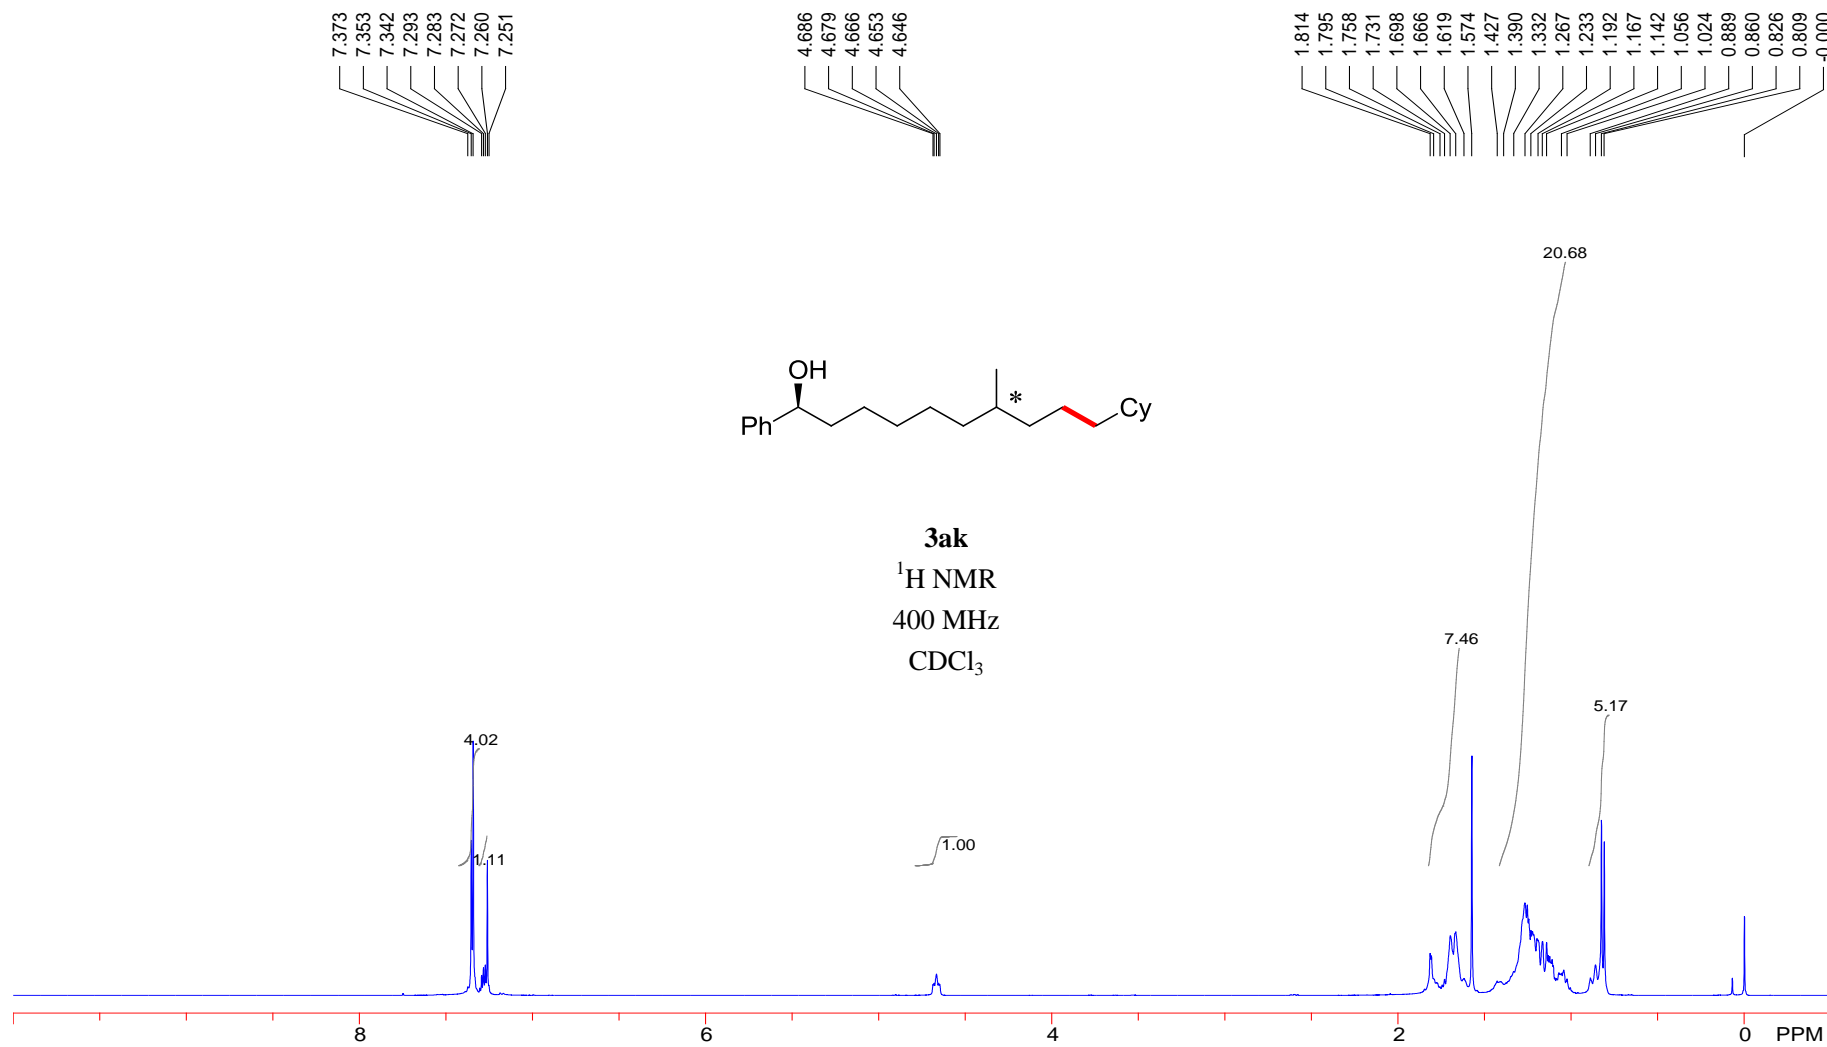

Supplementary Figure 201.  $^1\text{H}$  NMR spectrum for **3ak**

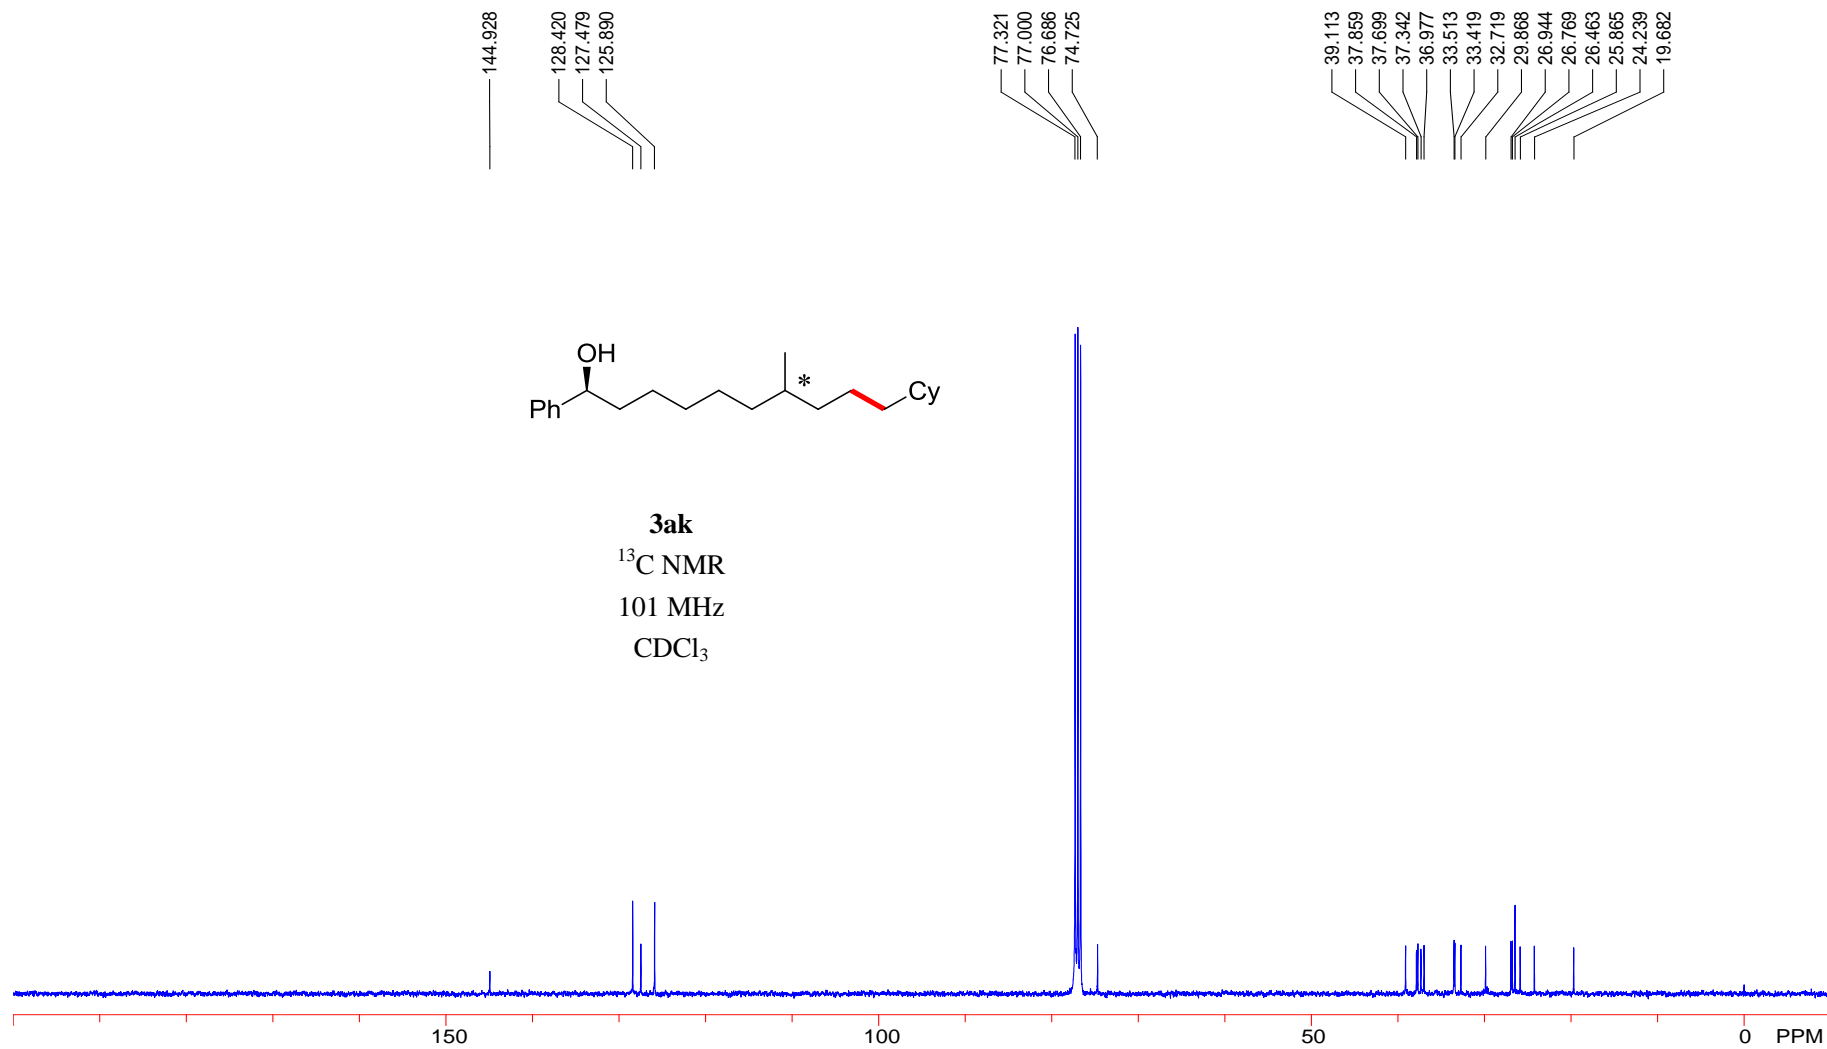

Supplementary Figure 202.  $^{13}\text{C}$  NMR spectrum for **3ak**

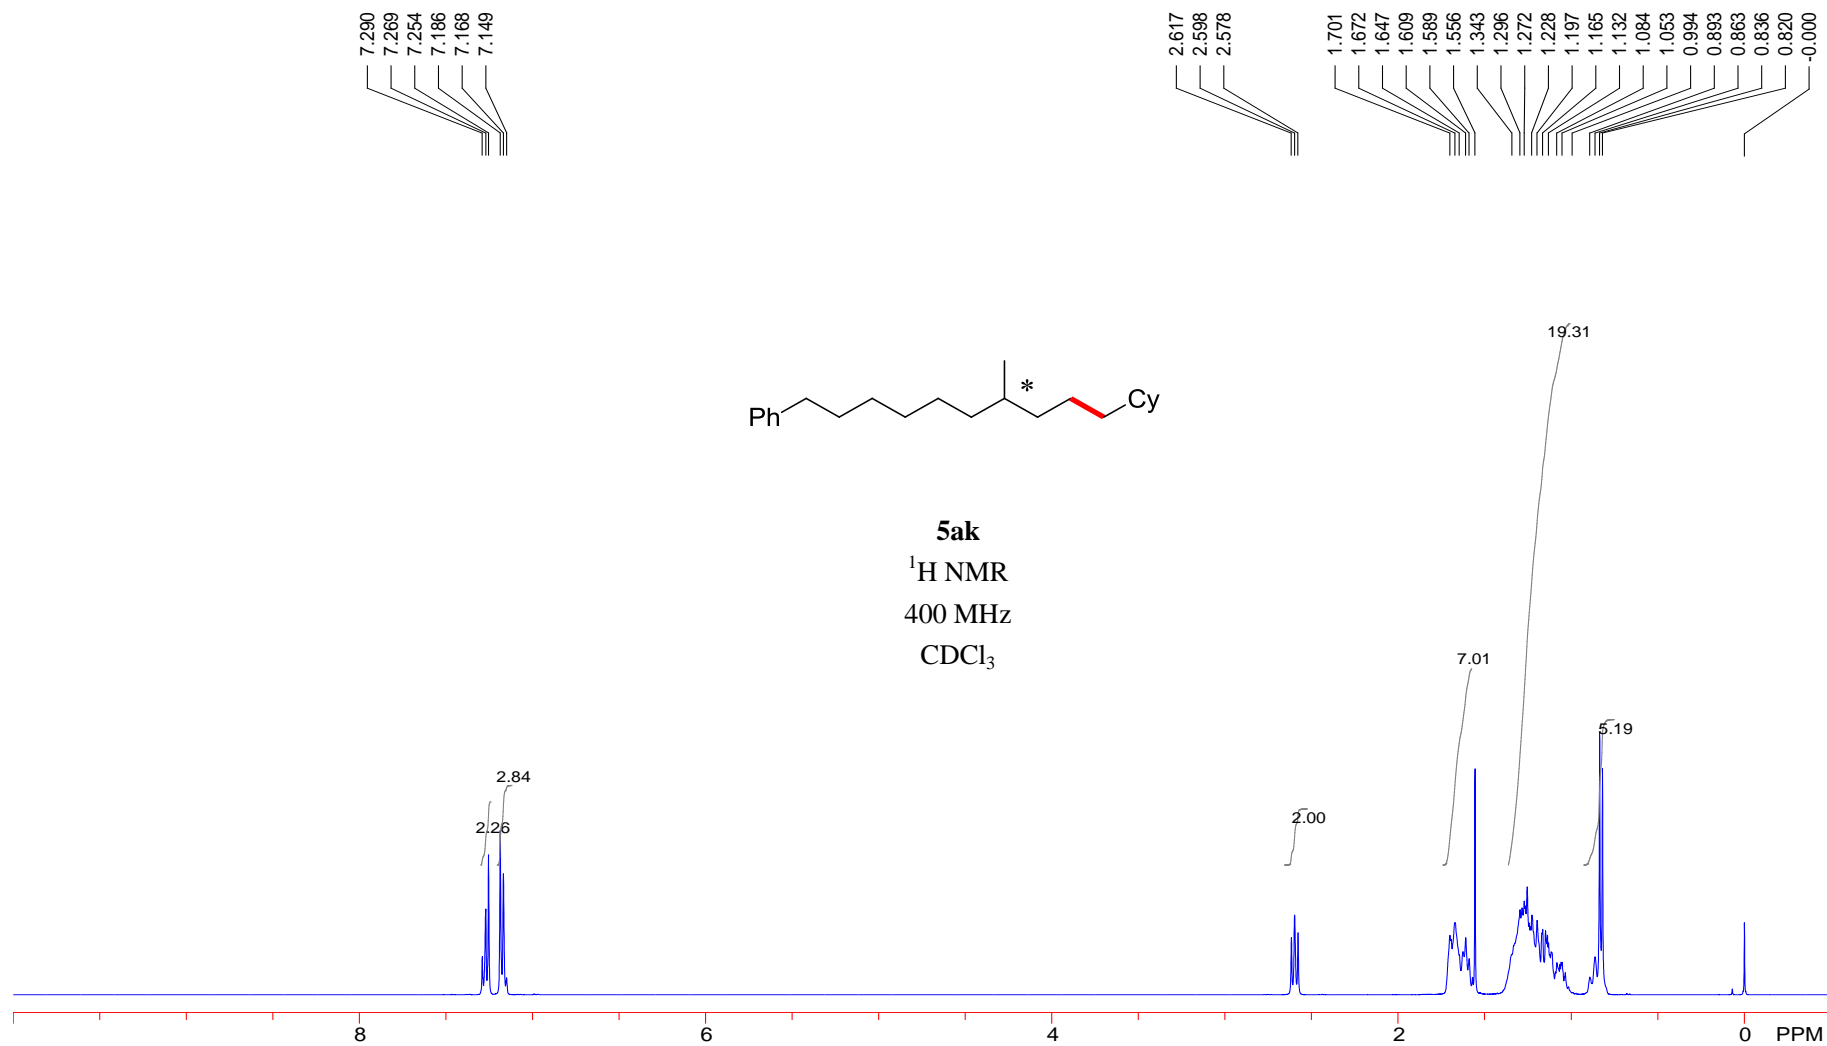

Supplementary Figure 203.  $^1\text{H}$  NMR spectrum for **5ak**

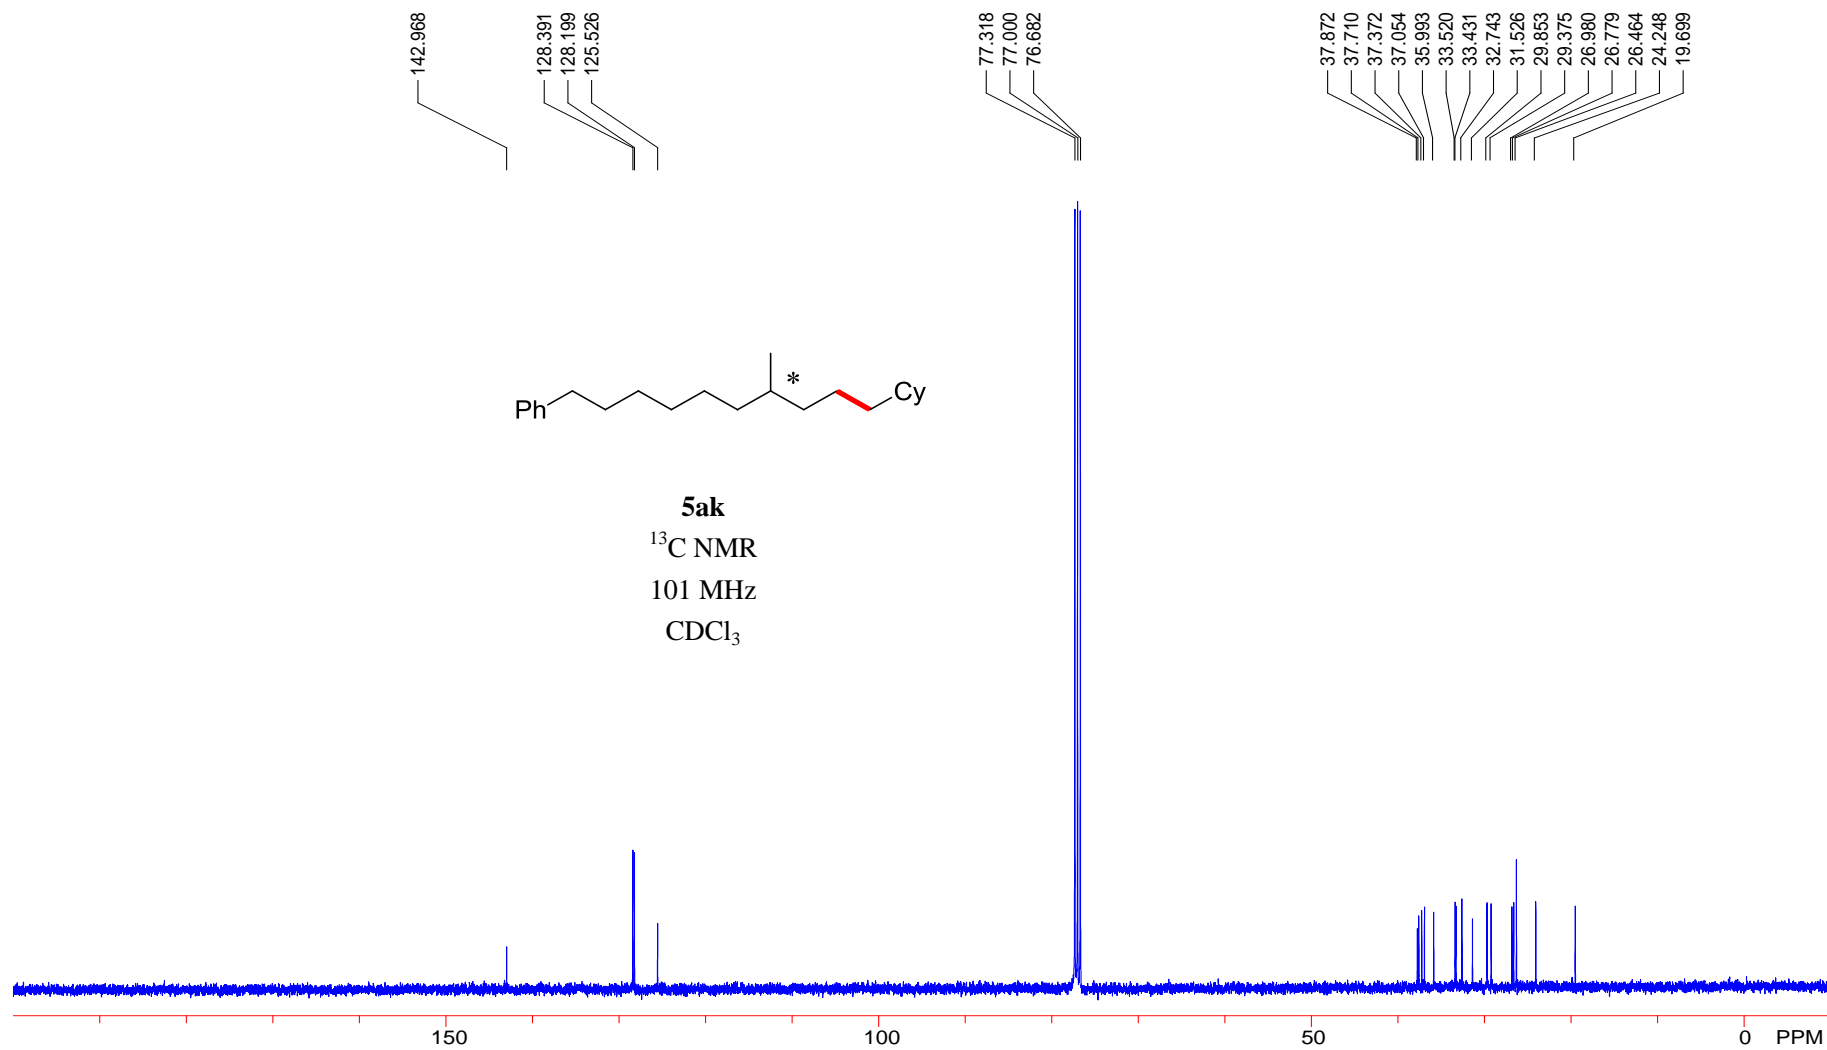

Supplementary Figure 204. <sup>13</sup>C NMR spectrum for **5ak**

Translation of Chinese Characters in HPLC spectra to English

描述: HPLC Condition 检测器: Detector 峰号: Peak 面积: Area

色谱图: HPLC Spectra 高度: Height 标记: Note 总计: Total

峰表: Area Percent Report 保留时间: Remaining Time

描述: AD-H, n-hexane:iPrOH = 98/2 1.0 ml/min, 220 nm

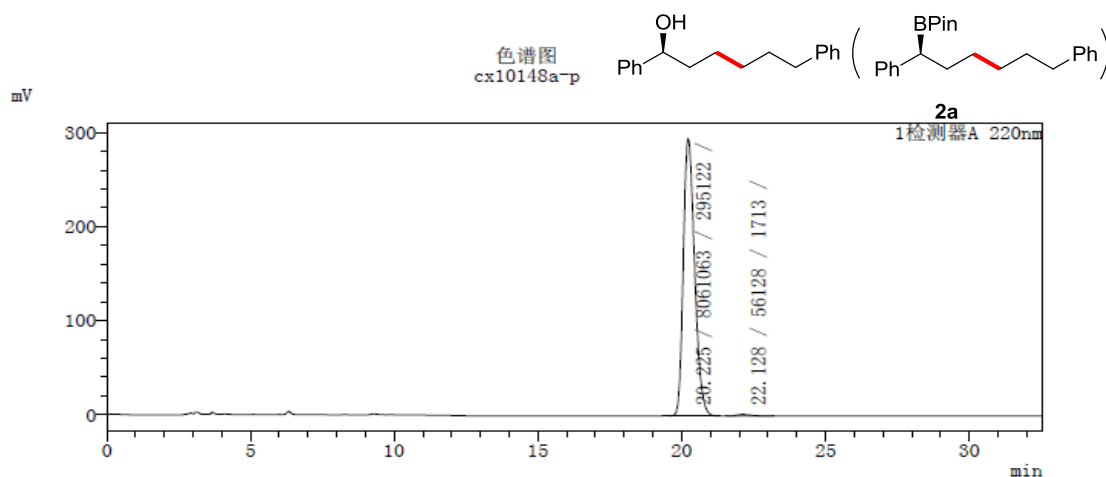

峰表

检测器A 220nm

| 峰号 | 保留时间   | 面积      | 高度     | 标记 | 面积%     |
|----|--------|---------|--------|----|---------|
| 1  | 20.225 | 8061063 | 295122 |    | 99.309  |
| 2  | 22.128 | 56128   | 1713   |    | 0.691   |
| 总计 |        | 8117191 | 296836 |    | 100.000 |

描述

: AD-H, n-hexane:iPrOH = 98/2 1.0 ml/min, 220 nm

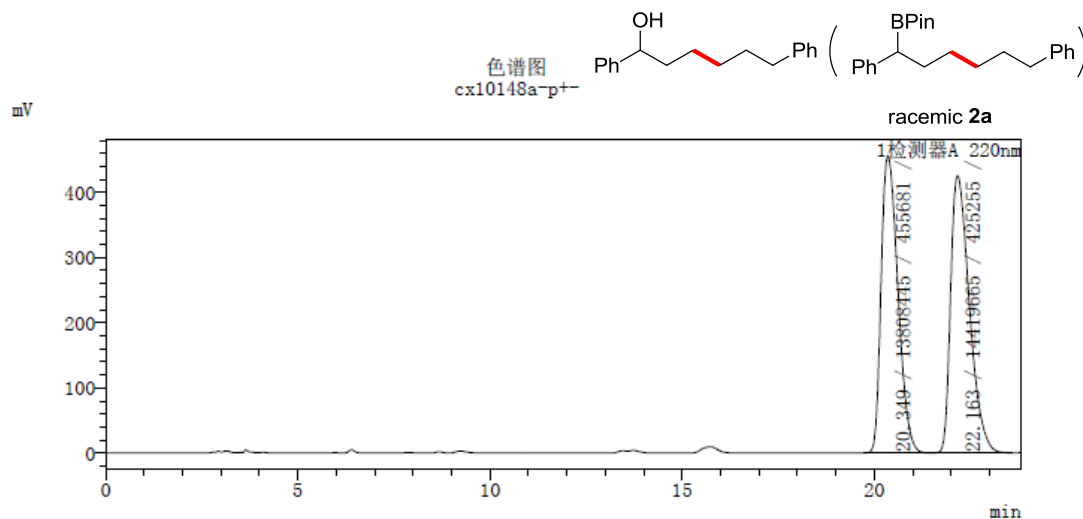

峰表

检测器A 220nm

| 峰号 | 保留时间   | 面积       | 高度     | 标记 | 面积%     |
|----|--------|----------|--------|----|---------|
| 1  | 20.349 | 13808445 | 455681 |    | 48.917  |
| 2  | 22.163 | 14419665 | 425255 |    | 51.083  |
| 总计 |        | 28228109 | 880936 |    | 100.000 |

Supplementary Figure 205. HPLC spectra for 2a

Translation of Chinese Characters in HPLC spectra to English

描述: HPLC Condition    检测器: Detector    峰号: Peak    面积: Area  
 色谱图: HPLC Spectra    高度: Height    标记: Note    总计: Total  
 峰表: Area Percent Report    保留时间: Remaining Time

描述 : AS-H, n-Hex/iPrOH = 98/2, 1.0 mL/min, 220 nm

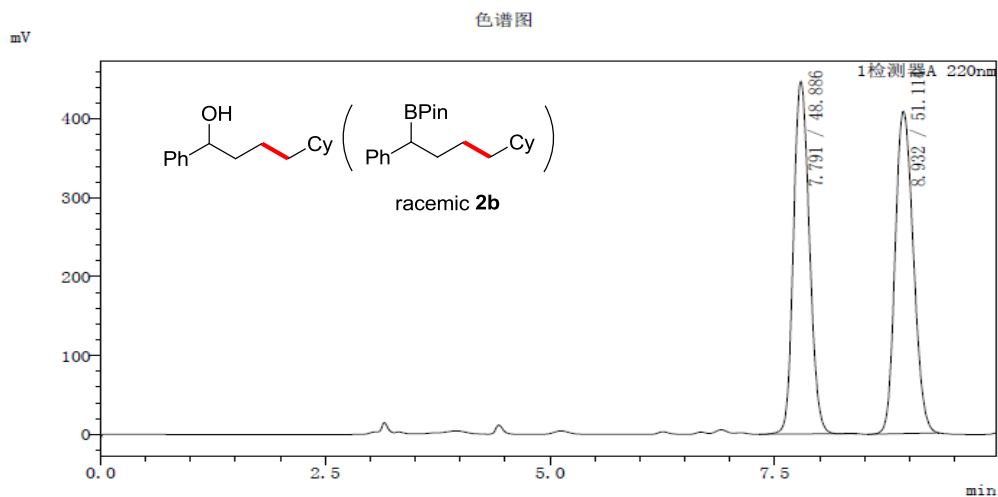

峰表

| 峰号 | 保留时间  | 面积       | 高度     | 标记 | 面积%     |
|----|-------|----------|--------|----|---------|
| 1  | 7.791 | 5506005  | 446596 | M  | 48.886  |
| 2  | 8.932 | 5756951  | 408522 | M  | 51.114  |
| 总计 |       | 11262955 | 855117 |    | 100.000 |

描述 : AS-H, n-Hex/iPrOH = 98/2, 1.0 mL/min, 220 nm

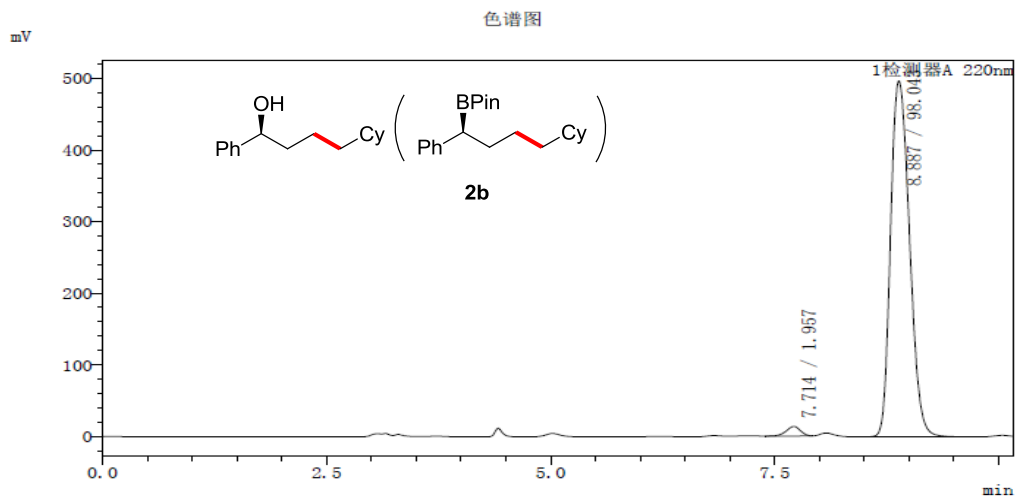

峰表

| 峰号 | 保留时间  | 面积      | 高度     | 标记 | 面积%     |
|----|-------|---------|--------|----|---------|
| 1  | 7.714 | 145749  | 13327  |    | 1.957   |
| 2  | 8.887 | 7300265 | 496681 |    | 98.043  |
| 总计 |       | 7446013 | 510008 |    | 100.000 |

Supplementary Figure 206. HPLC spectra for **2b**

Translation of Chinese Characters in HPLC spectra to English

描述: HPLC Condition    检测器: Detector    峰号: Peak    面积: Area  
 色谱图: HPLC Spectra    高度: Height    标记: Note    总计: Total  
 峰表: Area Percent Report    保留时间: Remaining Time

描述: AS-H, n-hexane:iPrOH = 98/2, 1.0 ml/min, 220 nm

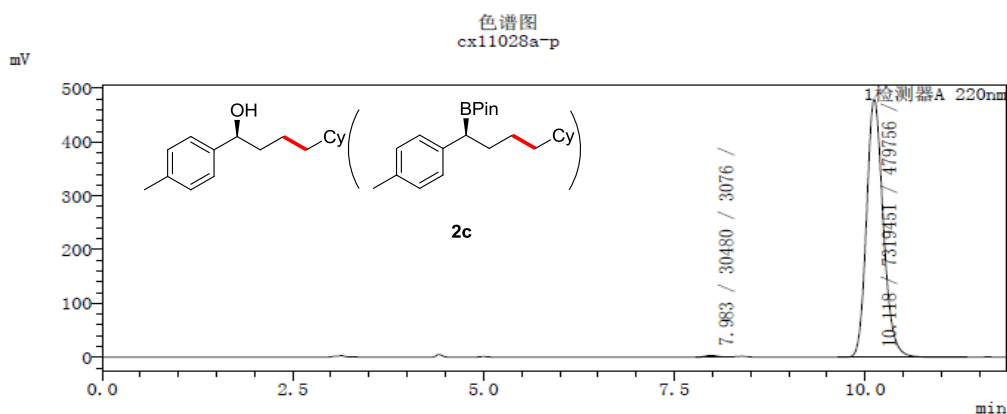

描述: AS-H, n-hexane:iPrOH = 98/2, 1.0 ml/min, 220 nm

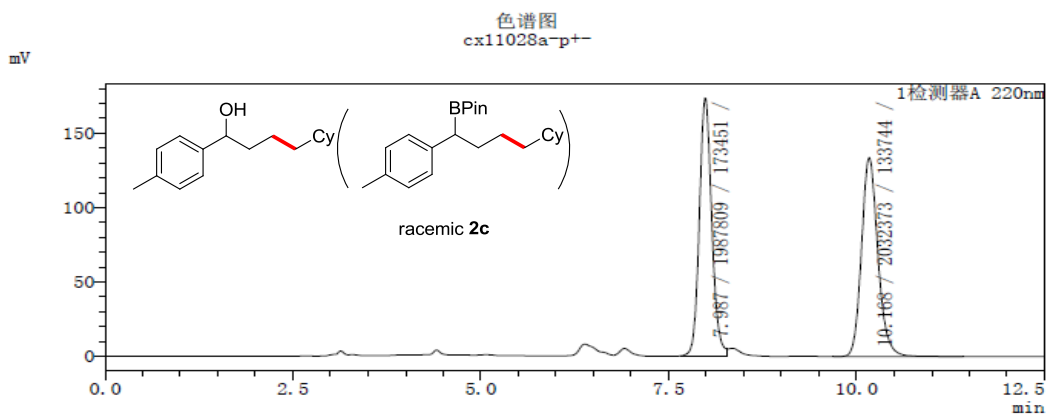

Supplementary Figure 207. HPLC spectra for 2c



Translation of Chinese Characters in HPLC spectra to English

描述: HPLC Condition      检测器: Detector      峰号: Peak      面积: Area  
 色谱图: HPLC Spectra      高度: Height      标记: Note      总计: Total  
 峰表: Area Percent Report      保留时间: Remaining Time

描述 : AS-H, n-Hex/iPrOH = 98/2, 1.0 mL/min, 220 nm

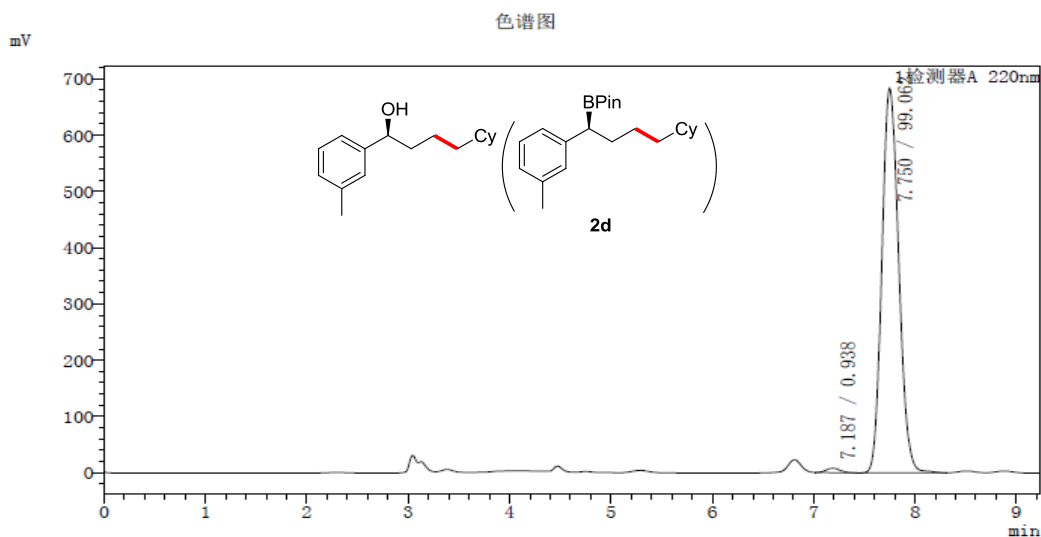

峰表

| 峰号 | 保留时间  | 面积      | 高度     | 标记 | 面积%     |
|----|-------|---------|--------|----|---------|
| 1  | 7.187 | 74710   | 7788   |    | 0.938   |
| 2  | 7.750 | 7892991 | 683786 |    | 99.062  |
| 总计 |       | 7967701 | 691574 |    | 100.000 |

描述 : AS-H, n-Hex/iPrOH = 98/2, 1.0 mL/min, 220 nm

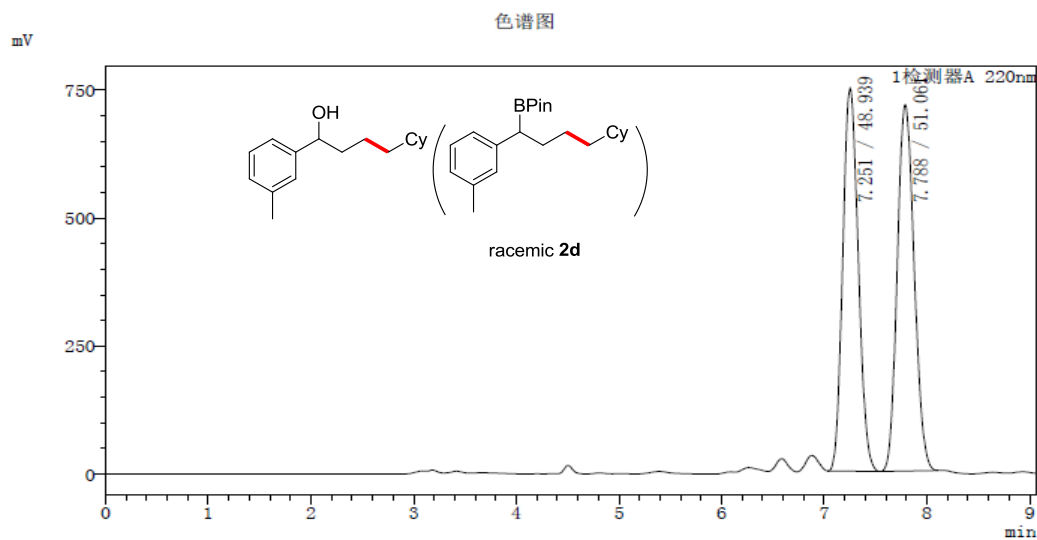

峰表

| 峰号 | 保留时间  | 面积       | 高度      | 标记 | 面积%     |
|----|-------|----------|---------|----|---------|
| 1  | 7.251 | 7845733  | 748125  |    | 48.939  |
| 2  | 7.788 | 8185898  | 716031  |    | 51.061  |
| 总计 |       | 16031631 | 1464156 |    | 100.000 |

**Supplementary Figure 208. HPLC spectra for 2d**

Translation of Chinese Characters in HPLC spectra to English

描述: HPLC Condition    检测器: Detector    峰号: Peak    面积: Area  
 色谱图: HPLC Spectra    高度: Height    标记: Note    总计: Total  
 峰表: Area Percent Report    保留时间: Remaining Time

描述: 检测器: 220nm    流动相: 0D-H, n-hexane:iPrOH = 98/2, 1.0 ml/min, 220 nm

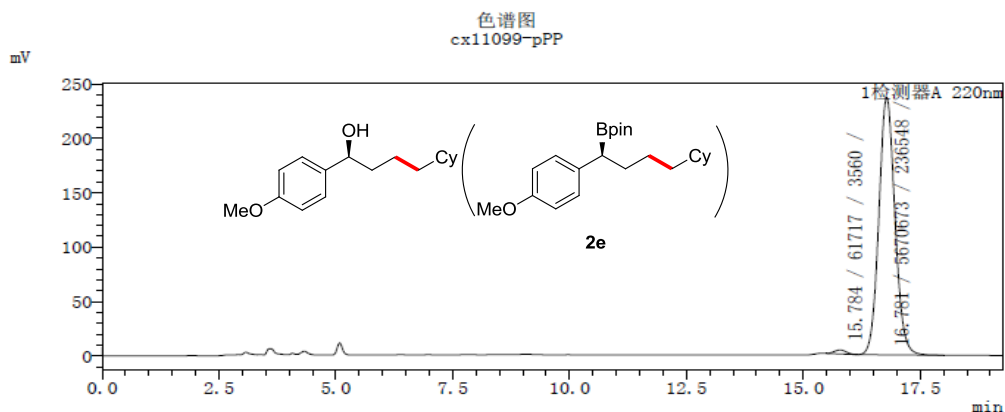

峰表

| 峰号 | 保留时间   | 面积      | 高度     | 标记 | 面积%     |
|----|--------|---------|--------|----|---------|
| 1  | 15.784 | 61717   | 3560   |    | 1.077   |
| 2  | 16.781 | 5670673 | 236548 |    | 98.923  |
| 总计 |        | 5732390 | 240108 |    | 100.000 |

描述: 检测器: 220nm    流动相: 0D-H, n-hexane:iPrOH = 98/2, 1.0 ml/min, 220 nm

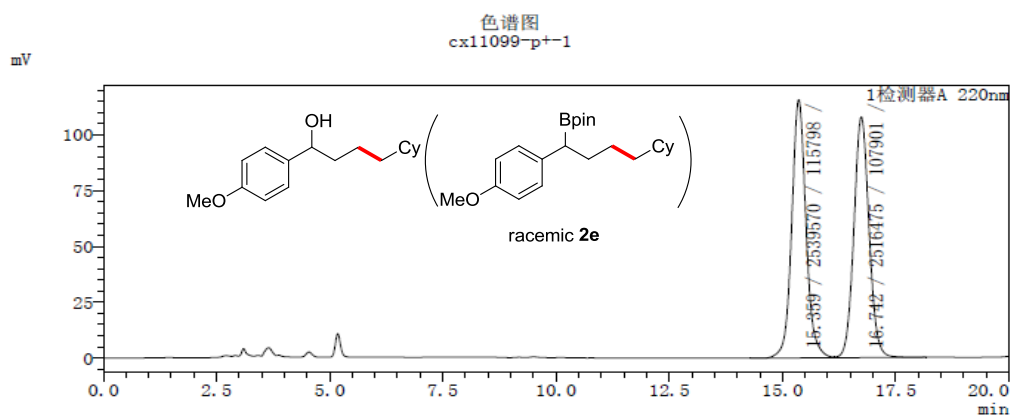

峰表

| 峰号 | 保留时间   | 面积      | 高度     | 标记 | 面积%     |
|----|--------|---------|--------|----|---------|
| 1  | 15.359 | 2539570 | 115798 |    | 50.228  |
| 2  | 16.742 | 2516475 | 107901 | V  | 49.772  |
| 总计 |        | 5056045 | 223700 |    | 100.000 |

Supplementary Figure 209. HPLC spectra for 2e

## Translation of Chinese Characters in HPLC spectra to English

描述 : HPLC Condition 检测器 : Detector 峰号 : Peak 面积 : Area

色谱图 : HPLC Spectra 高度 : Height 标记 : Note 总计 : Total

峰表 : Area Percent Report 保留时间 : Remaining Time

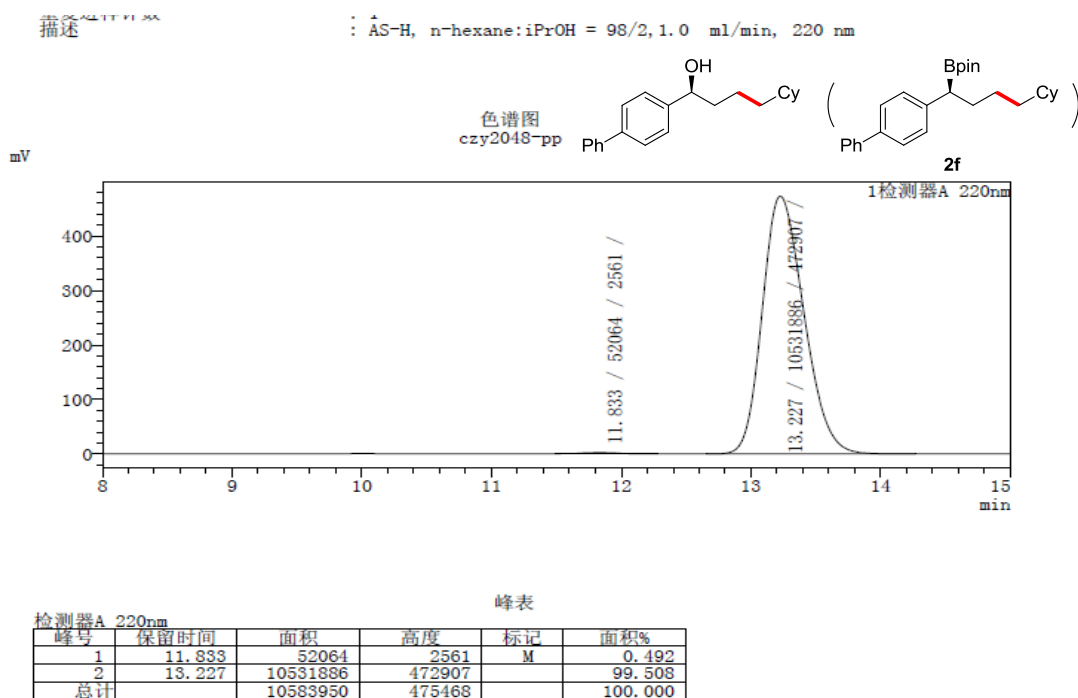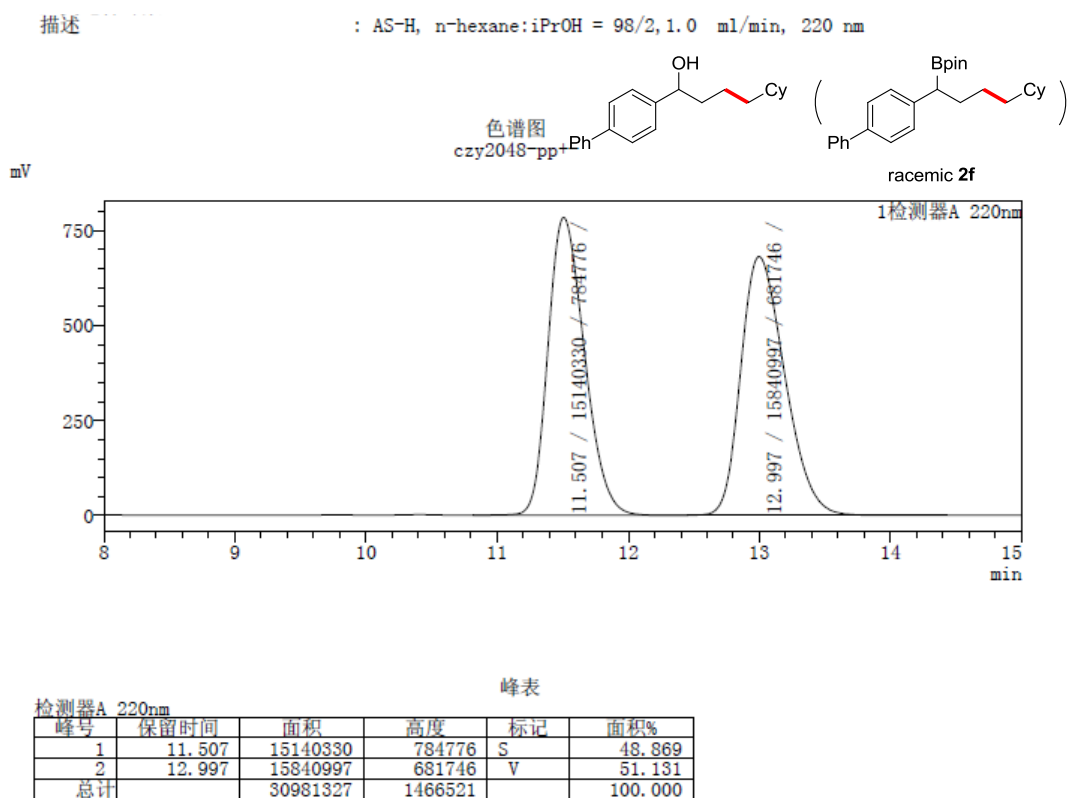

Supplementary Figure 210. HPLC spectra for 2f

Translation of Chinese Characters in HPLC spectra to English

描述: HPLC Condition      检测器: Detector      峰号: Peak      面积: Area  
 色谱图: HPLC Spectra      高度: Height      标记: Note      总计: Total  
 峰表: Area Percent Report      保留时间: Remaining Time

描述 : AS-H, n-Hex/iPrOH = 98/2, 1.0 mL/min, 220 nm

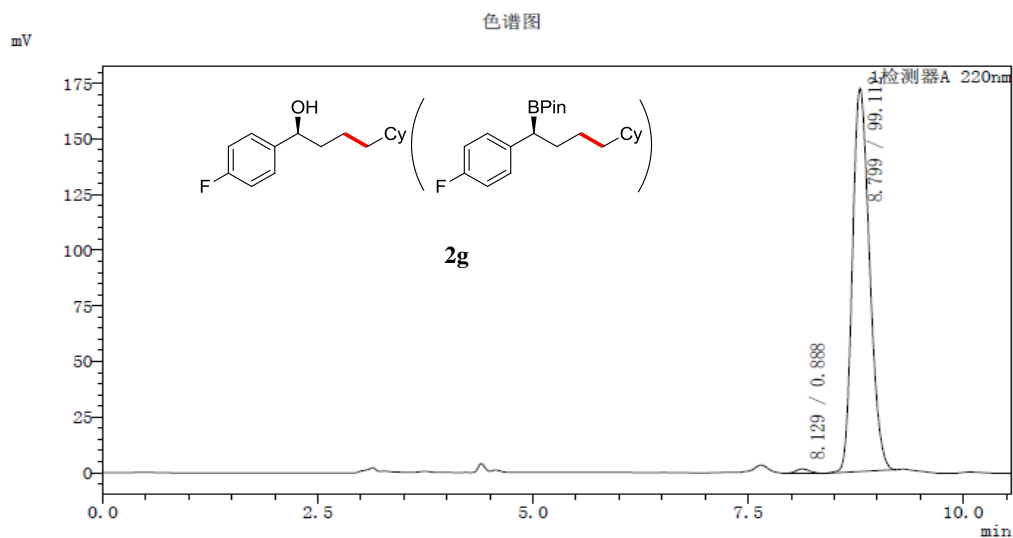

峰表

| 峰号 | 保留时间  | 面积      | 高度     | 标记 | 面积%     |
|----|-------|---------|--------|----|---------|
| 1  | 8.129 | 21366   | 1942   |    | 0.888   |
| 2  | 8.799 | 2385469 | 172274 |    | 99.112  |
| 总计 |       | 2406835 | 174216 |    | 100.000 |

描述 : AS-H, n-Hex/iPrOH = 98/2, 1.0 mL/min, 220 nm

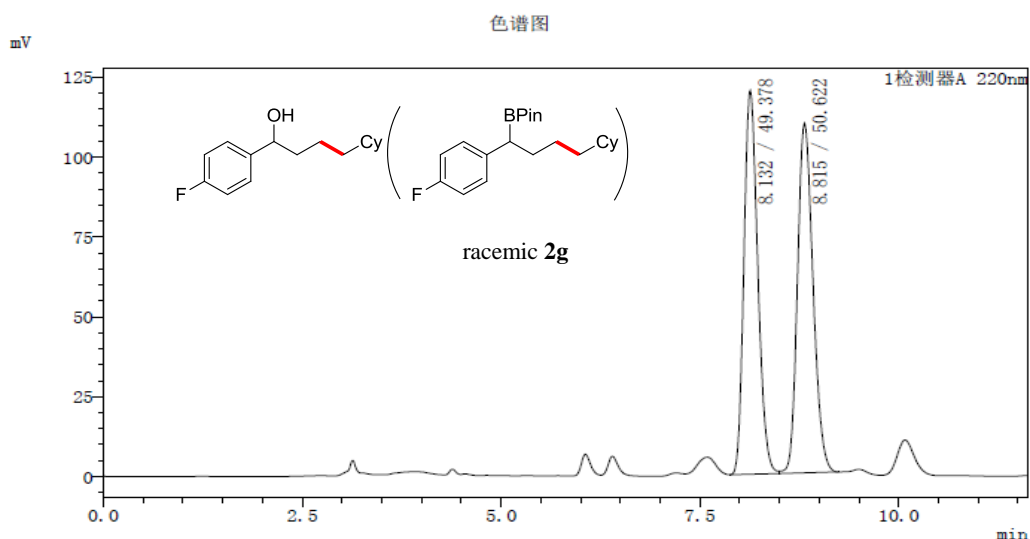

峰表

| 峰号 | 保留时间  | 面积      | 高度     | 标记 | 面积%     |
|----|-------|---------|--------|----|---------|
| 1  | 8.132 | 1451129 | 120135 |    | 49.378  |
| 2  | 8.815 | 1487691 | 109416 | V  | 50.622  |
| 总计 |       | 2938820 | 229551 |    | 100.000 |

Supplementary Figure 211. HPLC spectra for 2g

Translation of Chinese Characters in HPLC spectra to English

描述: HPLC Condition      检测器: Detector      峰号: Peak      面积: Area  
 色谱图: HPLC Spectra      高度: Height      标记: Note      总计: Total  
 峰表: Area Percent Report      保留时间: Remaining Time

描述 : AD-H, n-Hex/iPrOH = 98/2, 0.8 mL/min, 220 nm

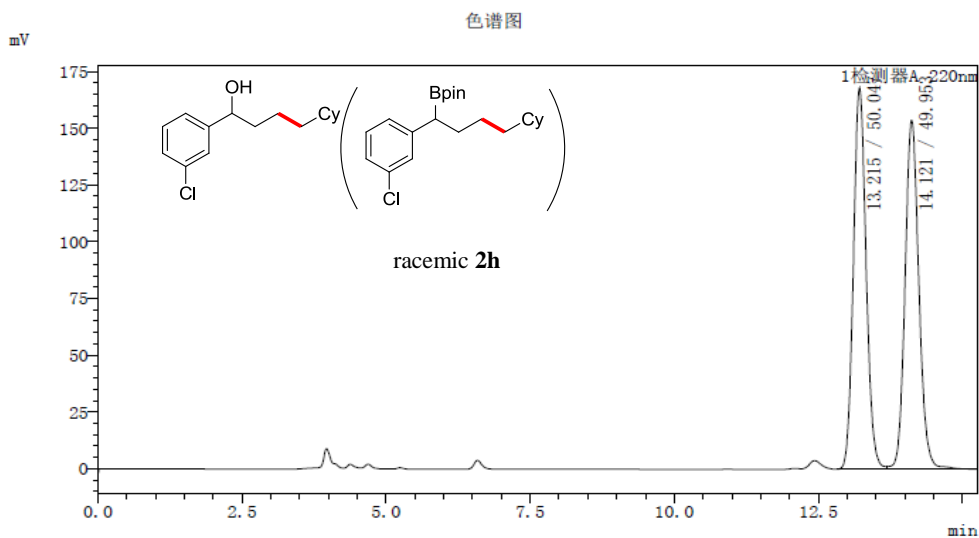

峰表

| 峰号 | 保留时间   | 面积      | 高度     | 标记 | 面积%     |
|----|--------|---------|--------|----|---------|
| 1  | 13.215 | 2576254 | 168084 |    | 50.047  |
| 2  | 14.121 | 2571441 | 153662 | V  | 49.953  |
| 总计 |        | 5147694 | 321746 |    | 100.000 |

描述 : AD-H, n-Hex/iPrOH = 98/2, 0.8 mL/min, 220 nm

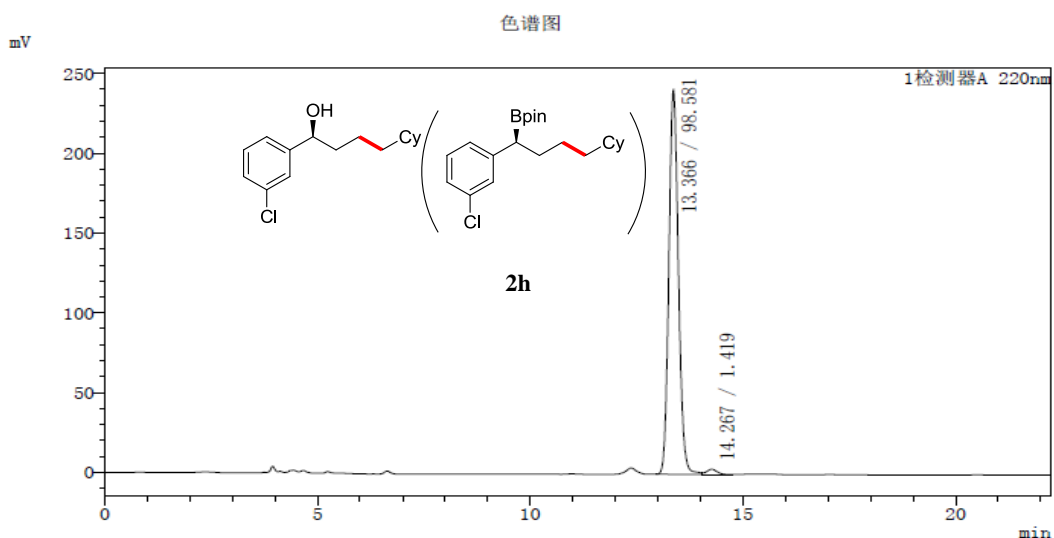

峰表

| 峰号 | 保留时间   | 面积      | 高度     | 标记 | 面积%     |
|----|--------|---------|--------|----|---------|
| 1  | 13.366 | 3757687 | 240673 |    | 98.581  |
| 2  | 14.267 | 54091   | 3259   | V  | 1.419   |
| 总计 |        | 3811778 | 243932 |    | 100.000 |

Supplementary Figure 212. HPLC spectra for **2h**

Translation of Chinese Characters in HPLC spectra to English

描述: HPLC Condition 检测器: Detector 峰号: Peak 面积: Area

色谱图: HPLC Spectra 高度: Height 标记: Note 总计: Total

峰表: Area Percent Report 保留时间: Remaining Time

描述: : AS-H, n-hexane:iPrOH = 99/1, 0.8 ml/min, 220 nm

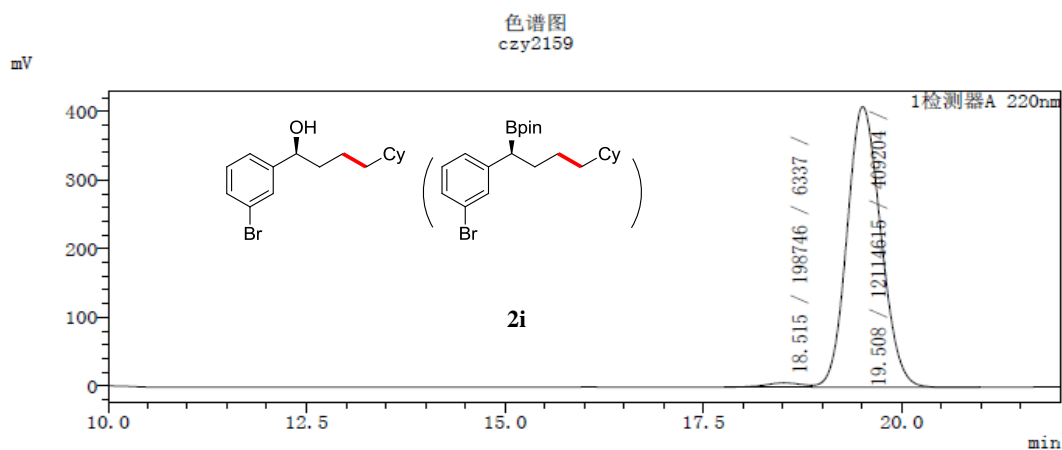

峰表

检测器A 220nm

| 峰号 | 保留时间   | 面积       | 高度     | 标记 | 面积%     |
|----|--------|----------|--------|----|---------|
| 1  | 18.515 | 198746   | 6337   |    | 1.614   |
| 2  | 19.508 | 12114615 | 409204 | V  | 98.386  |
| 总计 |        | 12313362 | 415542 |    | 100.000 |

描述: : AS-H, n-hexane:iPrOH = 99/1, 0.8 ml/min, 220 nm

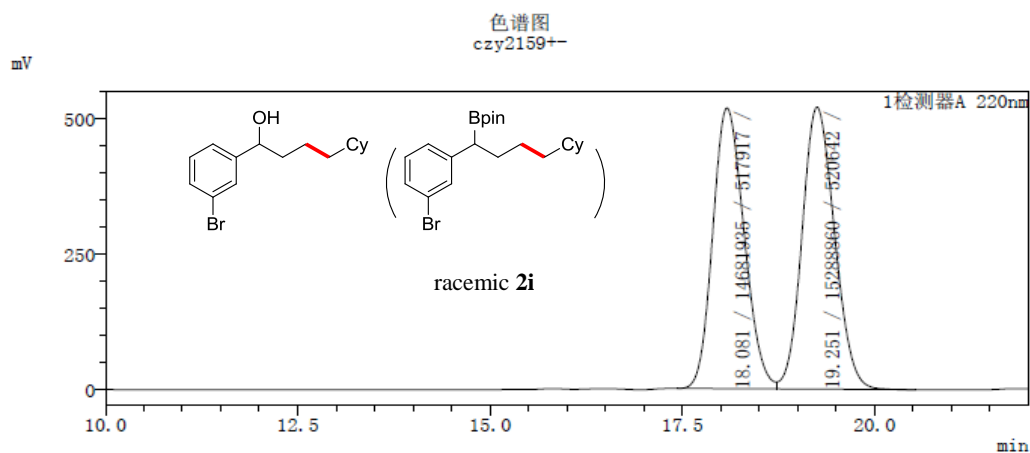

峰表

检测器A 220nm

| 峰号 | 保留时间   | 面积       | 高度      | 标记 | 面积%     |
|----|--------|----------|---------|----|---------|
| 1  | 18.081 | 14681935 | 517917  |    | 48.987  |
| 2  | 19.251 | 15288860 | 520642  | V  | 51.013  |
| 总计 |        | 29970794 | 1038560 |    | 100.000 |

### Supplementary Figure 213. HPLC spectra for 2i

Translation of Chinese Characters in HPLC spectra to English

描述: HPLC Condition 检测器: Detector 峰号: Peak 面积: Area

色谱图: HPLC Spectra 高度: Height 标记: Note 总计: Total

峰表: Area Percent Report 保留时间: Remaining Time

描述 : AS-H, n-hexane:iPrOH = 98/2, 1.0 ml/min, 220 nm

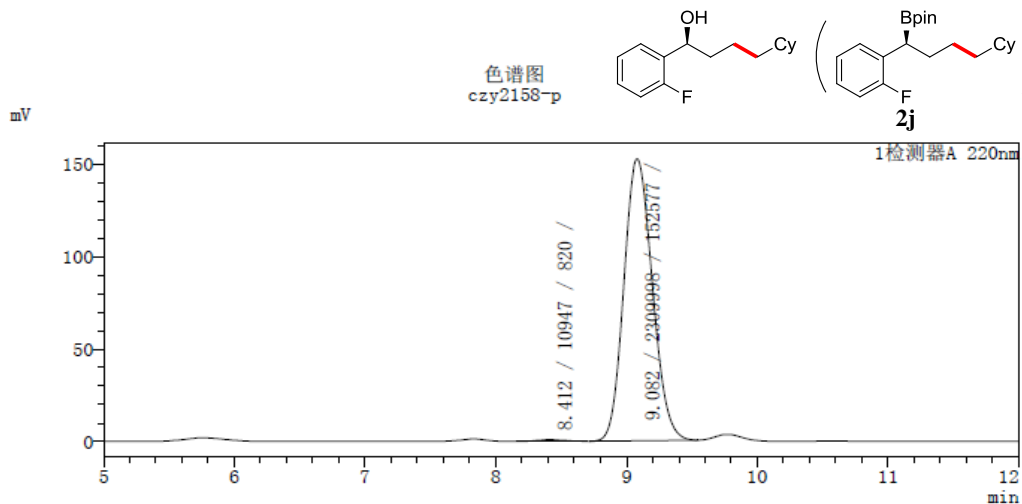

峰表

| 峰号 | 保留时间  | 面积      | 高度     | 标记 | 面积%     |
|----|-------|---------|--------|----|---------|
| 1  | 8.412 | 10947   | 820    |    | 0.472   |
| 2  | 9.082 | 2309998 | 152577 |    | 99.528  |
| 总计 |       | 2320945 | 153397 |    | 100.000 |

描述 : AS-H, n-hexane:iPrOH = 98/2, 1.0 ml/min, 220 nm

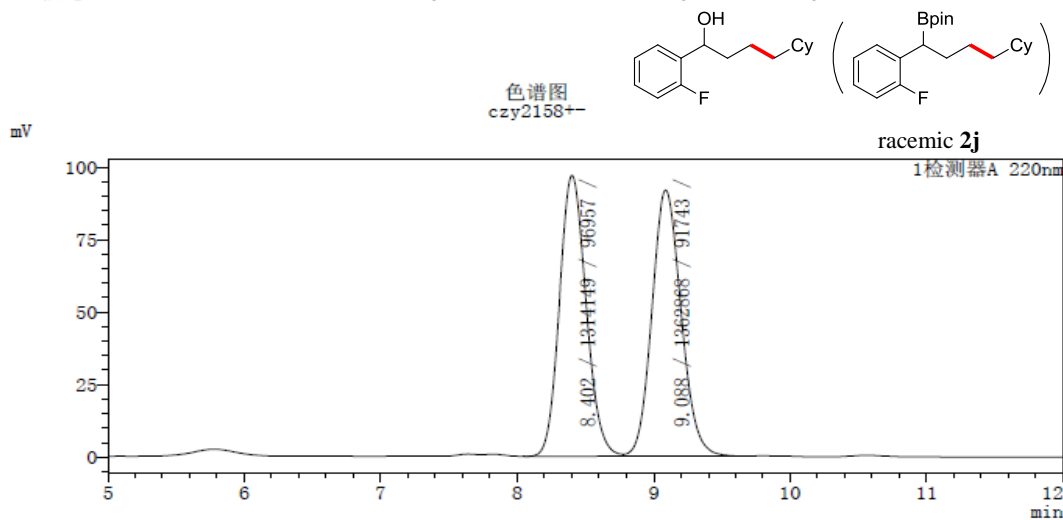

峰表

| 峰号 | 保留时间  | 面积      | 高度     | 标记 | 面积%     |
|----|-------|---------|--------|----|---------|
| 1  | 8.402 | 1314149 | 96957  |    | 49.090  |
| 2  | 9.088 | 1362868 | 91743  | V  | 50.910  |
| 总计 |       | 2677017 | 188700 |    | 100.000 |

Supplementary Figure 214. HPLC spectra for 2j

Translation of Chinese Characters in HPLC spectra to English

描述: HPLC Condition 检测器: Detector 峰号: Peak 面积: Area

色谱图: HPLC Spectra 高度: Height 标记: Note 总计: Total

峰表: Area Percent Report 保留时间: Remaining Time

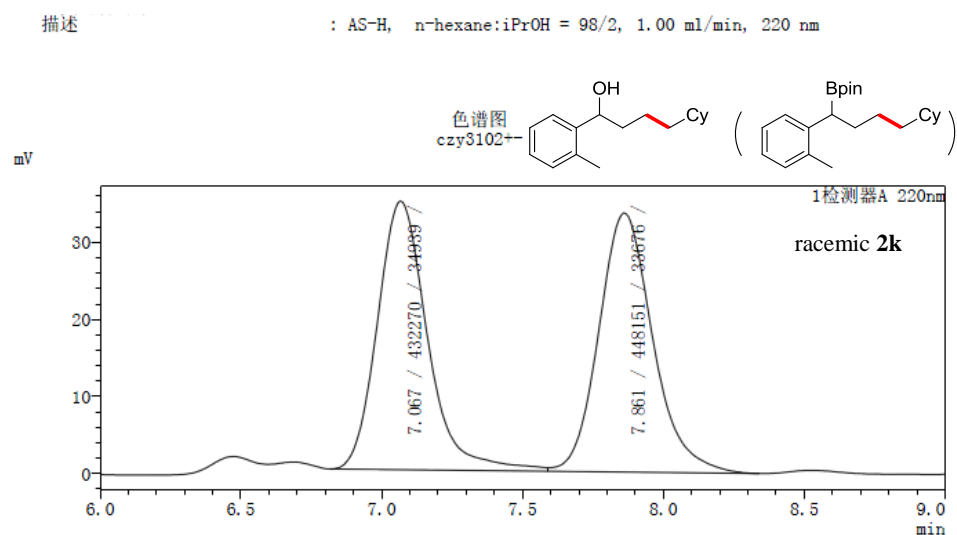

检测器A 220nm 峰表

| 峰号 | 保留时间  | 面积     | 高度    | 标记 | 面积%     |
|----|-------|--------|-------|----|---------|
| 1  | 7.067 | 432270 | 34939 |    | 49.098  |
| 2  | 7.861 | 448151 | 33676 | V  | 50.902  |
| 总计 |       | 880421 | 68615 |    | 100.000 |

描述 : AS-H, n-hexane:iPrOH = 98/2, 1.00 ml/min, 220 nm

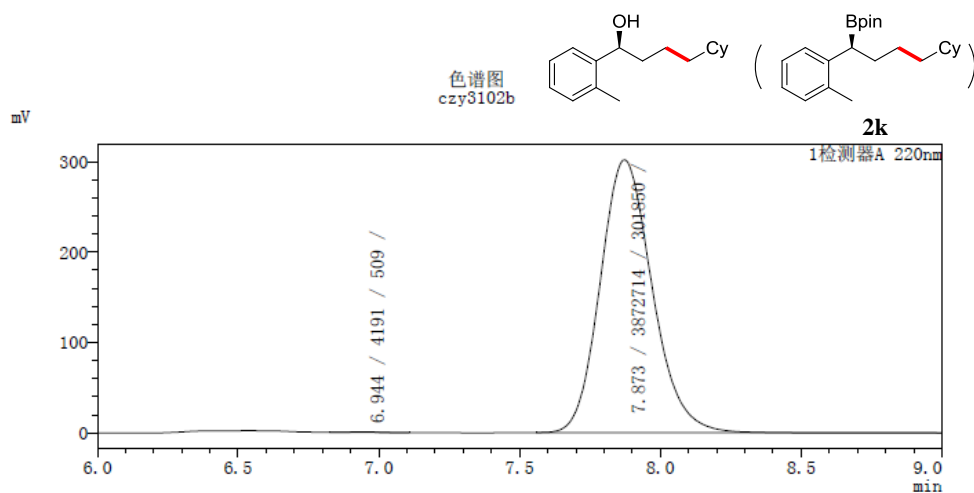

检测器A 220nm 峰表

| 峰号 | 保留时间  | 面积      | 高度     | 标记 | 面积%     |
|----|-------|---------|--------|----|---------|
| 1  | 6.944 | 4191    | 509    |    | 0.108   |
| 2  | 7.873 | 3872714 | 301850 | S  | 99.892  |
| 总计 |       | 3876905 | 302359 |    | 100.000 |

Supplementary Figure 215. HPLC spectra for 2k



Translation of Chinese Characters in HPLC spectra to English

描述: HPLC Condition    检测器: Detector    峰号: Peak    面积: Area  
 色谱图: HPLC Spectra    高度: Height    标记: Note    总计: Total  
 峰表: Area Percent Report    保留时间: Remaining Time

描述 : AD-H, n-hexane:iPrOH = 98/2, 1.0 ml/min, 220 nm

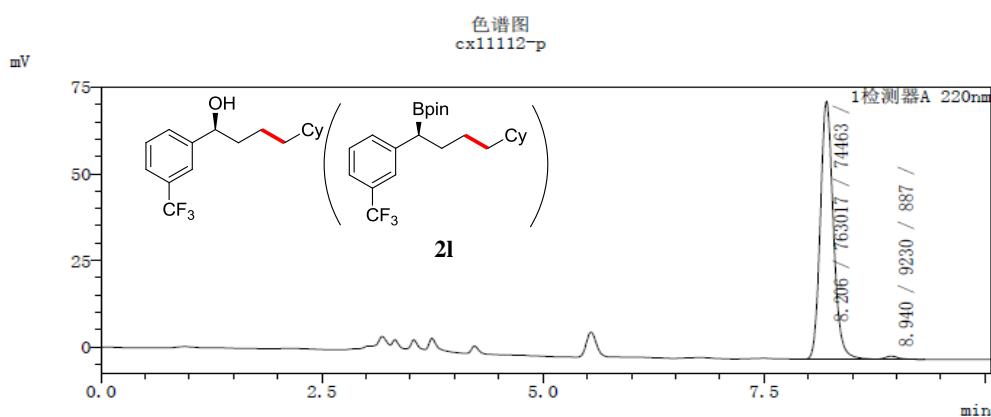

峰表

| 峰号 | 保留时间  | 面积     | 高度    | 标记 | 面积%     |
|----|-------|--------|-------|----|---------|
| 1  | 8.206 | 763017 | 74463 |    | 98.805  |
| 2  | 8.940 | 9230   | 887   |    | 1.195   |
| 总计 |       | 772248 | 75350 |    | 100.000 |

描述 : AD-H, n-hexane:iPrOH = 98/2, 1.0 ml/min, 220 nm

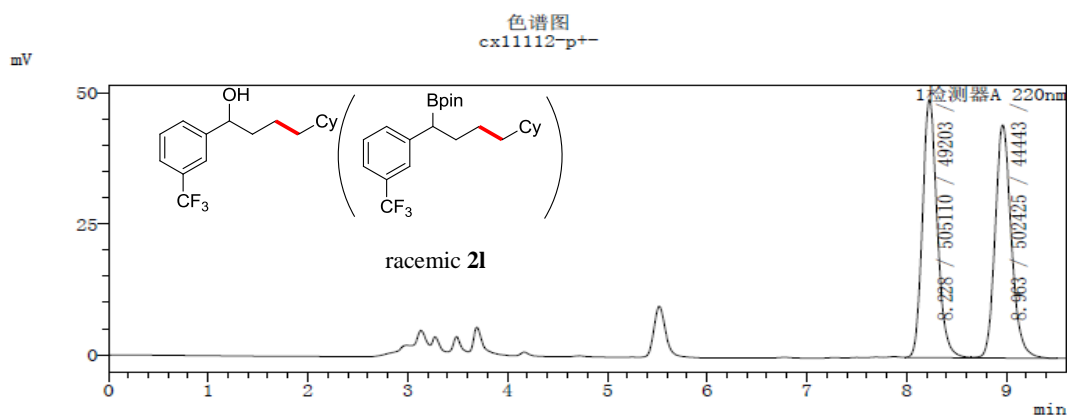

峰表

| 峰号 | 保留时间  | 面积      | 高度    | 标记 | 面积%     |
|----|-------|---------|-------|----|---------|
| 1  | 8.228 | 505110  | 49203 |    | 50.133  |
| 2  | 8.963 | 502425  | 44443 | V  | 49.867  |
| 总计 |       | 1007535 | 93646 |    | 100.000 |

Supplementary Figure 216. HPLC spectra for 2l

Translation of Chinese Characters in HPLC spectra to English

描述: HPLC Condition    检测器: Detector    峰号: Peak    面积: Area  
 色谱图: HPLC Spectra    高度: Height    标记: Note    总计: Total  
 峰表: Area Percent Report    保留时间: Remaining Time

描述: : AS-H, n-hexane:iPrOH = 98/2, 1.0 ml/min, 220 nm

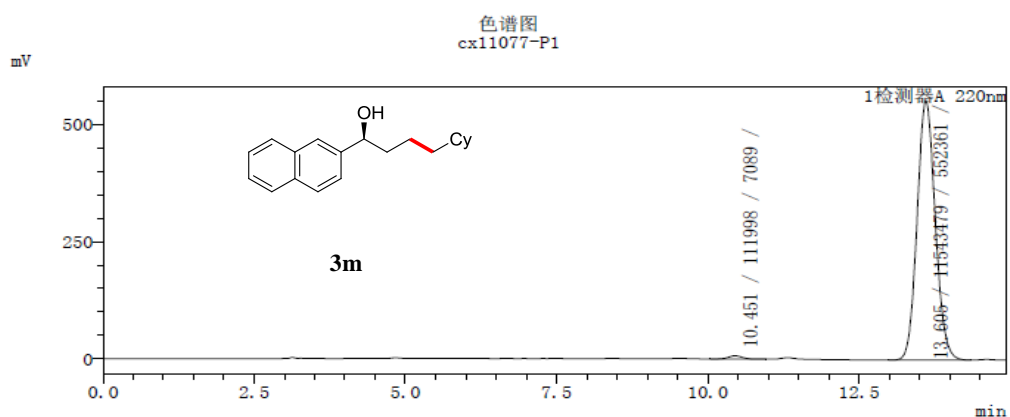

峰表

| 峰号 | 保留时间   | 面积       | 高度     | 标记 | 面积%     |
|----|--------|----------|--------|----|---------|
| 1  | 10.451 | 111998   | 7089   |    | 0.961   |
| 2  | 13.605 | 11543479 | 552361 |    | 99.039  |
| 总计 |        | 11655477 | 559451 |    | 100.000 |

描述: : AS-H, n-hexane:iPrOH = 98/2, 1.0 ml/min, 220 nm

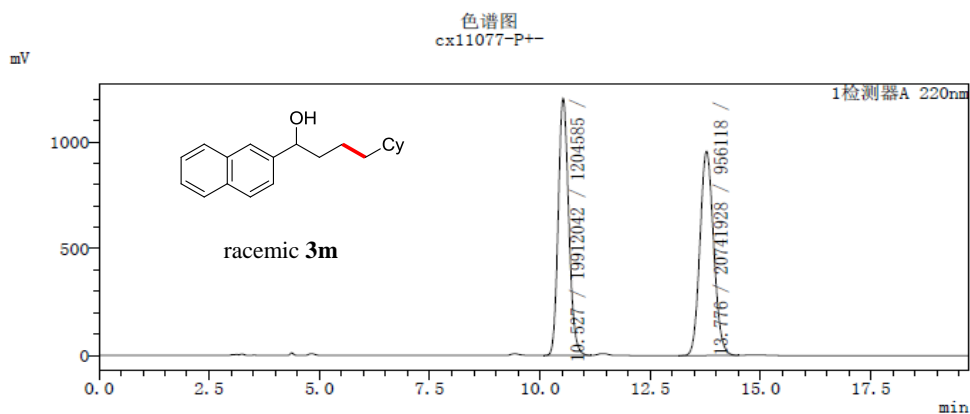

峰表

| 峰号 | 保留时间   | 面积       | 高度      | 标记 | 面积%     |
|----|--------|----------|---------|----|---------|
| 1  | 10.527 | 19912042 | 1204585 |    | 48.979  |
| 2  | 13.776 | 20741928 | 956118  |    | 51.021  |
| 总计 |        | 40653971 | 2160704 |    | 100.000 |

Supplementary Figure 217. HPLC spectra for 3m

Translation of Chinese Characters in HPLC spectra to English

描述: HPLC Condition 检测器: Detector 峰号: Peak 面积: Area

色谱图: HPLC Spectra 高度: Height 标记: Note 总计: Total

峰表: Area Percent Report 保留时间: Remaining Time

描述 : AS-H, n-hexane:iPrOH = 98/2, 1.0 ml/min, 220 nm

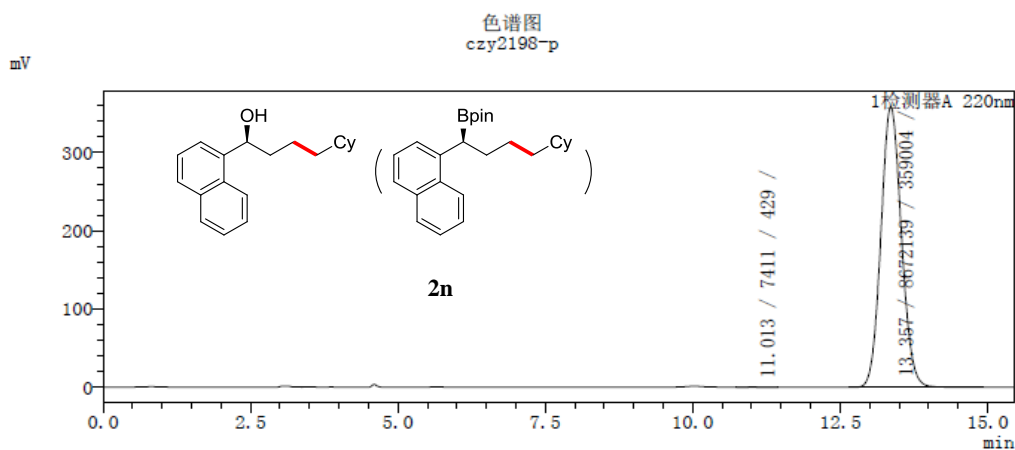

描述 : AS-H, n-hexane:iPrOH = 98/2, 1.0 ml/min, 220 nm

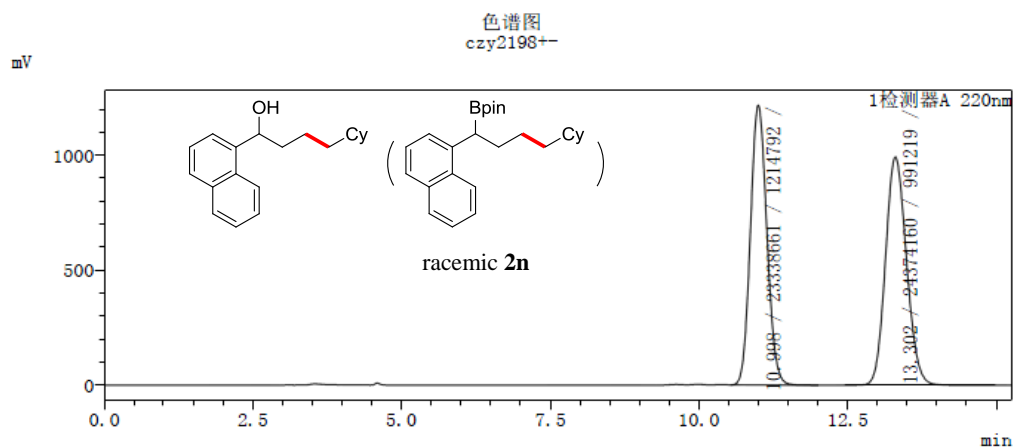

Supplementary Figure 218. HPLC spectra for 2n

Translation of Chinese Characters in HPLC spectra to English

描述: HPLC Condition      检测器: Detector      峰号: Peak      面积: Area  
 色谱图: HPLC Spectra      高度: Height      标记: Note      总计: Total  
 峰表: Area Percent Report      保留时间: Remaining Time

描述: Ad-H, n-hexane:iPrOH = 98/2, 1.0 ml/min, 220 nm

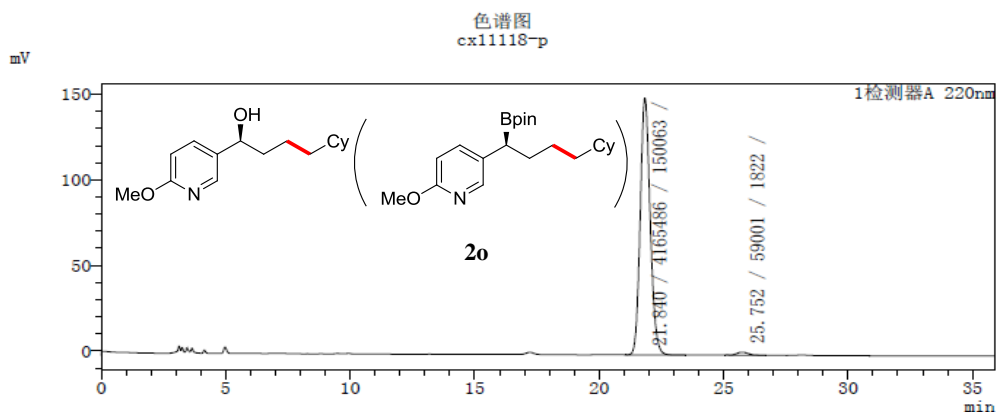

峰表

| 峰号 | 保留时间   | 面积      | 高度     | 标记 | 面积%     |
|----|--------|---------|--------|----|---------|
| 1  | 21.840 | 4165486 | 150063 |    | 98.603  |
| 2  | 25.752 | 59001   | 1822   |    | 1.397   |
| 总计 |        | 4224487 | 151885 |    | 100.000 |

描述: Ad-H, n-hexane:iPrOH = 98/2, 1.0 ml/min, 220 nm

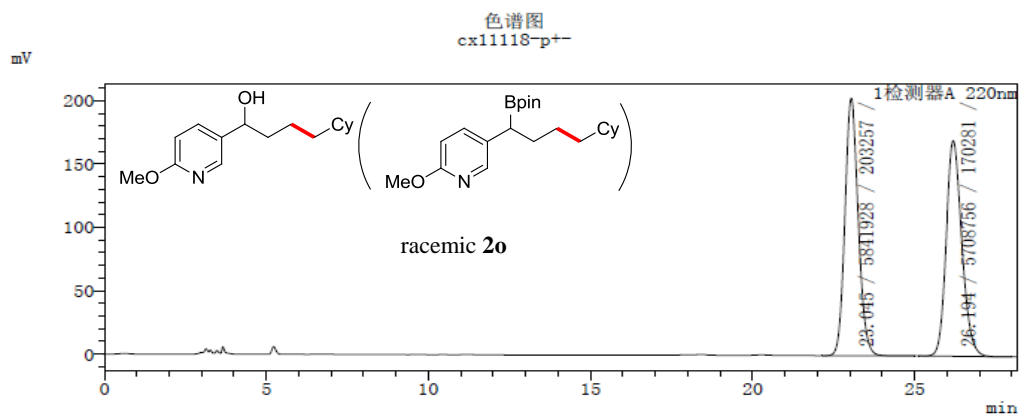

峰表

| 峰号 | 保留时间   | 面积       | 高度     | 标记 | 面积%     |
|----|--------|----------|--------|----|---------|
| 1  | 23.045 | 5841928  | 203257 |    | 50.576  |
| 2  | 26.194 | 5708756  | 170281 |    | 49.424  |
| 总计 |        | 11550684 | 373539 |    | 100.000 |

Supplementary Figure 219. HPLC spectra for 2o

Translation of Chinese Characters in HPLC spectra to English

描述 : HPLC Condition 检测器 : Detector 峰号 : Peak 面积 : Area

色谱图 : HPLC Spectra 高度 : Height 标记 : Note 总计 : Total

峰表 : Area Percent Report 保留时间 : Remaining Time

描述 : AS-H, n-Hexane/iPrOH =99/1, 1 mL/min, 220 nm

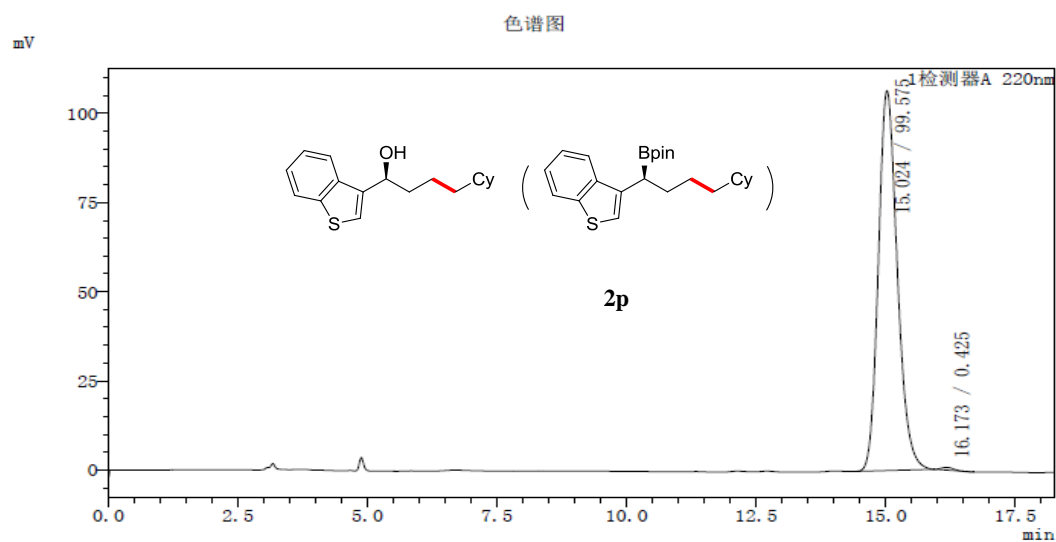

峰表

| 峰号 | 保留时间   | 面积      | 高度     | 标记 | 面积%     |
|----|--------|---------|--------|----|---------|
| 1  | 15.024 | 2709225 | 106510 |    | 99.575  |
| 2  | 16.173 | 11566   | 762    | M  | 0.425   |
| 总计 |        | 2720791 | 107272 |    | 100.000 |

描述 : AS-H, n-Hexane/iPrOH =99/1, 1 mL/min, 220 nm

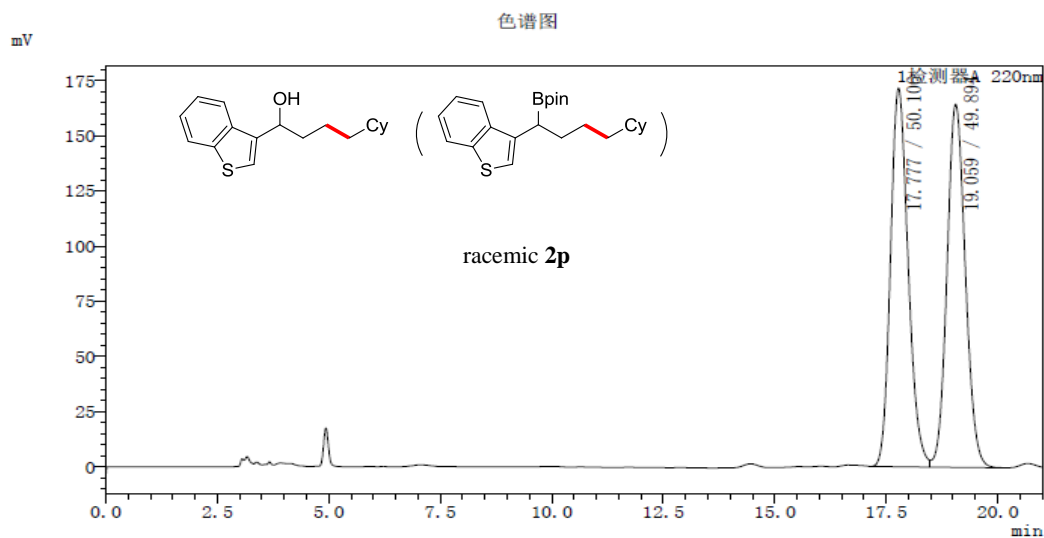

峰表

| 峰号 | 保留时间   | 面积      | 高度     | 标记 | 面积%     |
|----|--------|---------|--------|----|---------|
| 1  | 17.777 | 4723790 | 171493 |    | 50.106  |
| 2  | 19.059 | 4703781 | 164478 | V  | 49.894  |
| 总计 |        | 9427571 | 335971 |    | 100.000 |

Supplementary Figure 220. HPLC spectra for 2p

Translation of Chinese Characters in HPLC spectra to English

描述: HPLC Condition      检测器: Detector      峰号: Peak      面积: Area  
 色谱图: HPLC Spectra      高度: Height      标记: Note      总计: Total  
 峰表: Area Percent Report      保留时间: Remaining Time

描述 : AS-H, n-hexane:iPrOH = 98/2, 1.0 ml/min, 220 nm

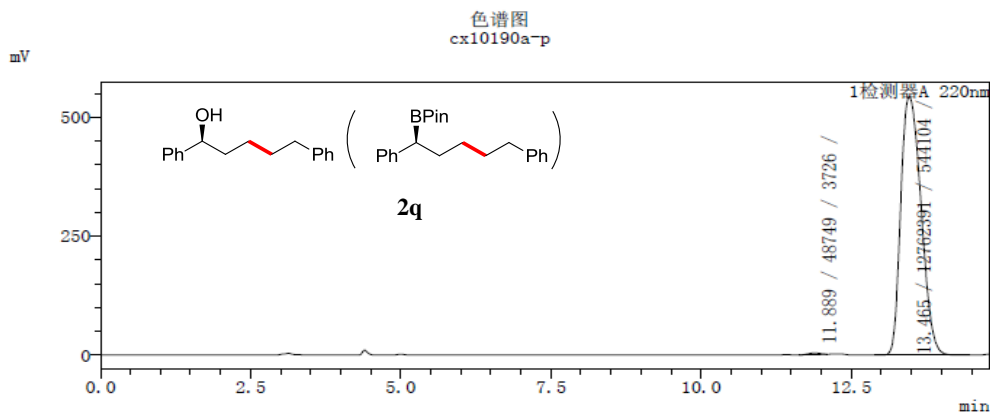

峰表

| 峰号 | 保留时间   | 面积       | 高度     | 标记 | 面积%     |
|----|--------|----------|--------|----|---------|
| 1  | 11.889 | 48749    | 3726   |    | 0.381   |
| 2  | 13.465 | 12762391 | 544104 |    | 99.619  |
| 总计 |        | 12811141 | 547830 |    | 100.000 |

描述 : AS-H, n-hexane:iPrOH = 98/2, 1.0 ml/min, 220 nm

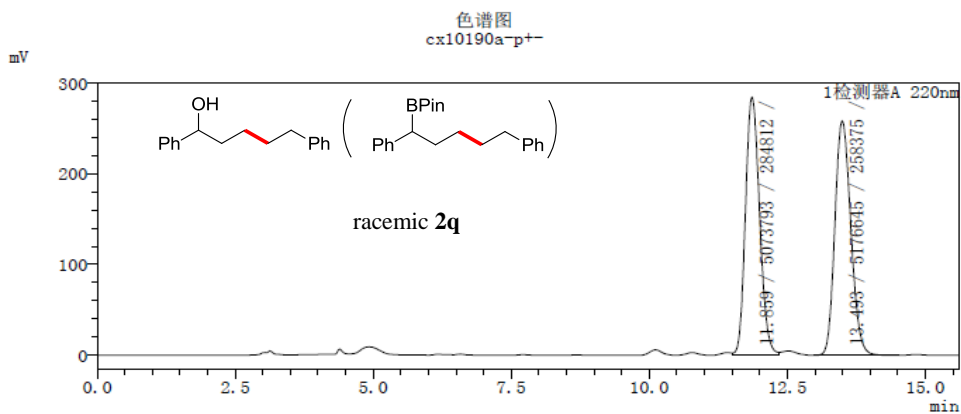

峰表

| 峰号 | 保留时间   | 面积       | 高度     | 标记 | 面积%     |
|----|--------|----------|--------|----|---------|
| 1  | 11.859 | 5073793  | 284812 | M  | 49.498  |
| 2  | 13.493 | 5176645  | 258375 | S  | 50.502  |
| 总计 |        | 10250438 | 543187 |    | 100.000 |

Supplementary Figure 221. HPLC spectra for 2q

Translation of Chinese Characters in HPLC spectra to English

描述: HPLC Condition      检测器: Detector      峰号: Peak      面积: Area  
 色谱图: HPLC Spectra      高度: Height      标记: Note      总计: Total  
 峰表: Area Percent Report      保留时间: Remaining Time

描述: 0J-H, n-hexane:iPrOH = 99/1, 0.5 ml/min, 220 nm

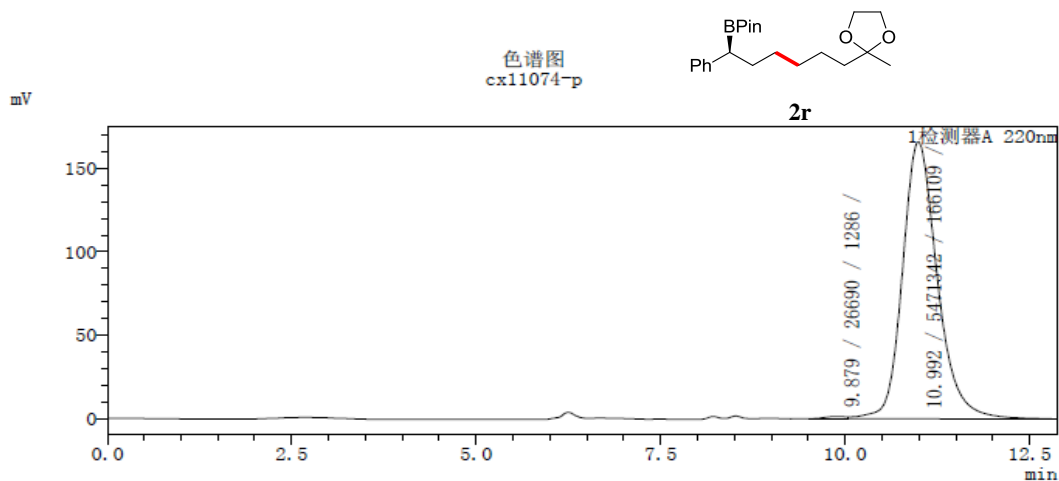

峰表

| 峰号 | 保留时间   | 面积      | 高度     | 标记 | 面积%     |
|----|--------|---------|--------|----|---------|
| 1  | 9.879  | 26690   | 1286   |    | 0.485   |
| 2  | 10.992 | 5471342 | 166109 | V  | 99.515  |
| 总计 |        | 5498032 | 167395 |    | 100.000 |

描述: 0J-H, n-hexane:iPrOH = 99/1, 0.5 ml/min, 220 nm

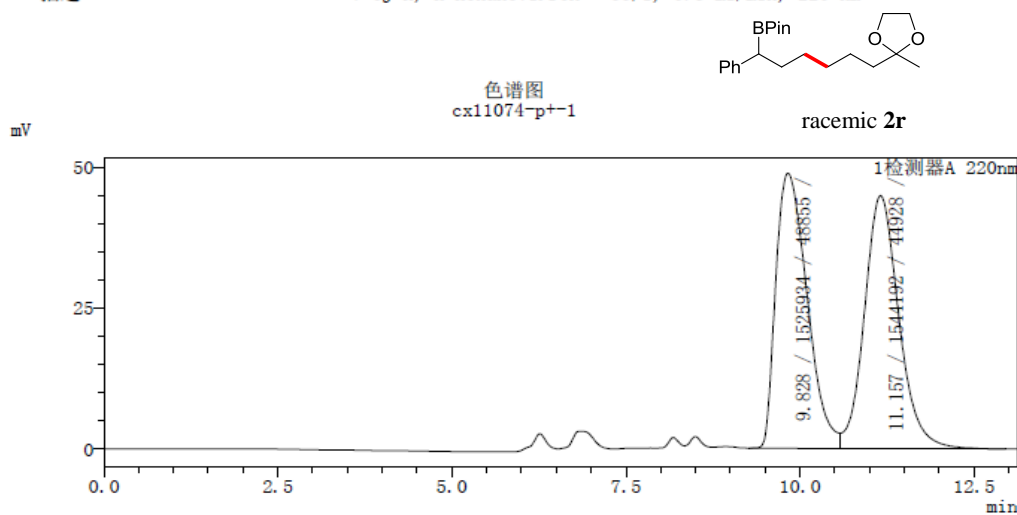

峰表

| 峰号 | 保留时间   | 面积      | 高度    | 标记 | 面积%     |
|----|--------|---------|-------|----|---------|
| 1  | 9.828  | 1525934 | 48855 |    | 49.703  |
| 2  | 11.157 | 1544192 | 44928 | V  | 50.297  |
| 总计 |        | 3070127 | 93784 |    | 100.000 |

Supplementary Figure 222. HPLC spectra for 2r

Translation of Chinese Characters in HPLC spectra to English

描述: HPLC Condition    检测器: Detector    峰号: Peak    面积: Area  
 色谱图: HPLC Spectra    高度: Height    标记: Note    总计: Total  
 峰表: Area Percent Report    保留时间: Remaining Time

描述 : AS-H, n-Hex/iPrOH = 98/2, 1.0 mL/min, 220 nm

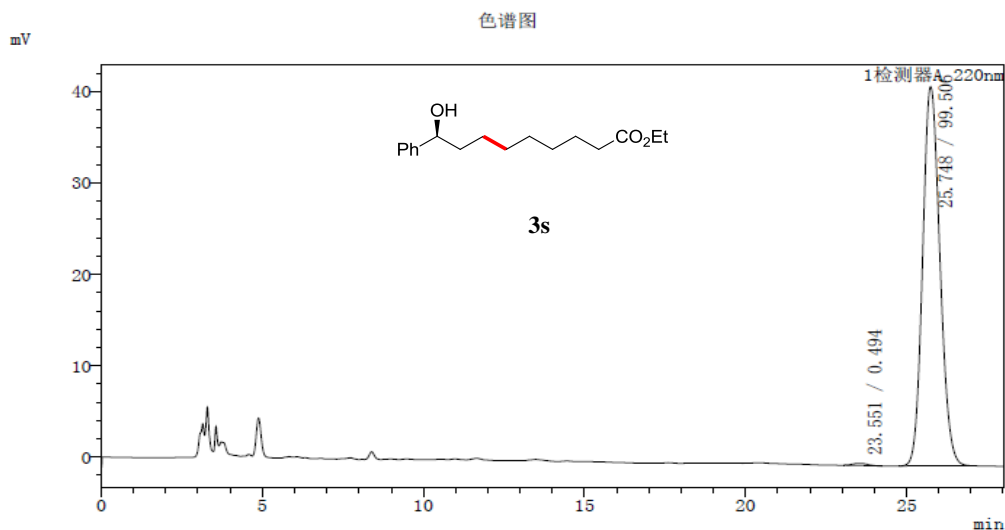

峰表

| 峰号 | 保留时间   | 面积      | 高度    | 标记 | 面积%     |
|----|--------|---------|-------|----|---------|
| 1  | 23.551 | 7630    | 251   |    | 0.494   |
| 2  | 25.748 | 1537859 | 41487 |    | 99.506  |
| 总计 |        | 1545489 | 41738 |    | 100.000 |

描述 : AS-H, n-Hex/iPrOH = 98/2, 1.0 mL/min, 220 nm

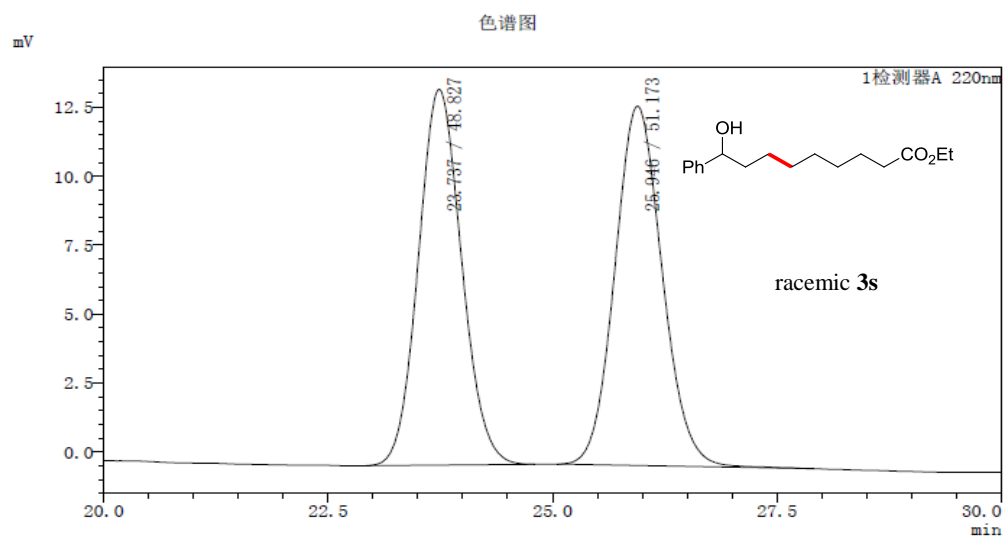

峰表

| 峰号 | 保留时间   | 面积     | 高度    | 标记 | 面积%     |
|----|--------|--------|-------|----|---------|
| 1  | 23.737 | 456058 | 13629 |    | 48.827  |
| 2  | 25.946 | 477961 | 13034 |    | 51.173  |
| 总计 |        | 934019 | 26663 |    | 100.000 |

Supplementary Figure 223. HPLC spectra for 3s



Translation of Chinese Characters in HPLC spectra to English

描述: HPLC Condition      检测器: Detector      峰号: Peak      面积: Area  
 色谱图: HPLC Spectra      高度: Height      标记: Note      总计: Total  
 峰表: Area Percent Report      保留时间: Remaining Time

描述 : OD-H, n-Hexane/iPrOH = 90/10, 1.0 mL/min, 220 nm

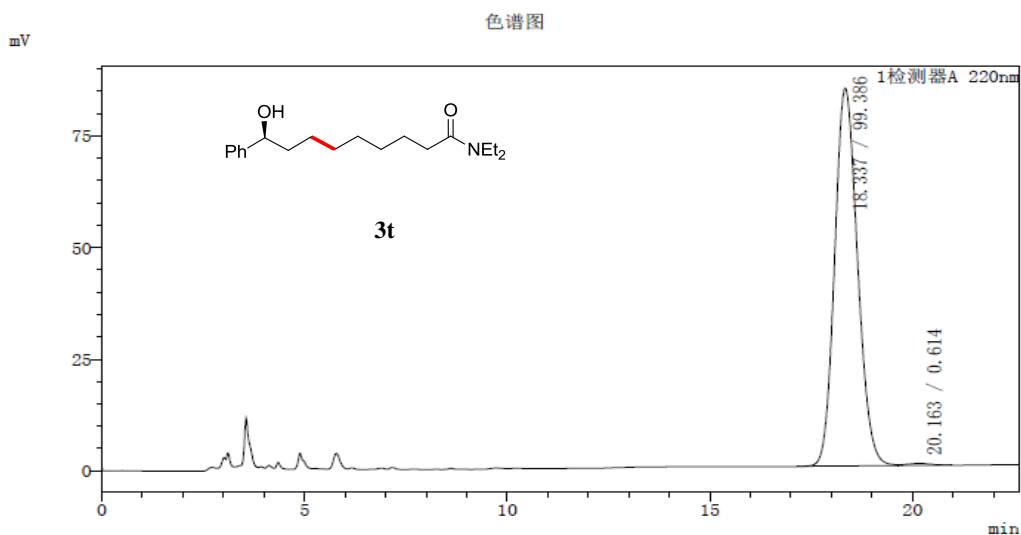

峰表

| 检测器A 220nm |        |         |       |    |         |
|------------|--------|---------|-------|----|---------|
| 峰号         | 保留时间   | 面积      | 高度    | 标记 | 面积%     |
| 1          | 18.337 | 3313378 | 84586 |    | 99.386  |
| 2          | 20.163 | 20476   | 470   | V  | 0.614   |
| 总计         |        | 3333854 | 85056 |    | 100.000 |

描述 : OD-H, n-Hexane/iPrOH = 90/10, 1.0 mL/min, 220 nm

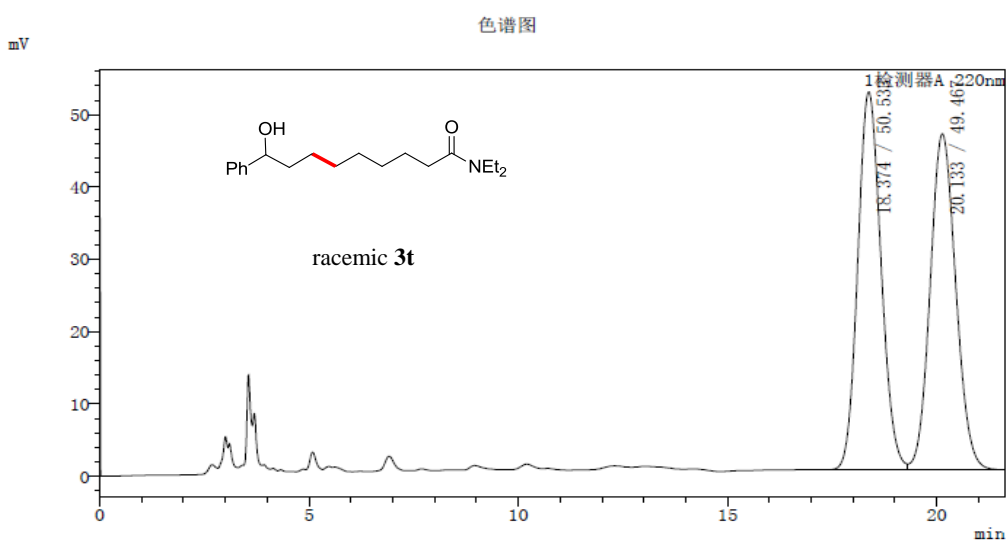

峰表

| 检测器A 220nm |        |         |       |    |         |
|------------|--------|---------|-------|----|---------|
| 峰号         | 保留时间   | 面积      | 高度    | 标记 | 面积%     |
| 1          | 18.374 | 2020718 | 52288 |    | 50.533  |
| 2          | 20.133 | 1978095 | 46478 | V  | 49.467  |
| 总计         |        | 3998813 | 98766 |    | 100.000 |

Supplementary Figure 224. HPLC spectra for 3t

Translation of Chinese Characters in HPLC spectra to English

描述: HPLC Condition      检测器: Detector      峰号: Peak      面积: Area  
 色谱图: HPLC Spectra      高度: Height      标记: Note      总计: Total  
 峰表: Area Percent Report      保留时间: Remaining Time

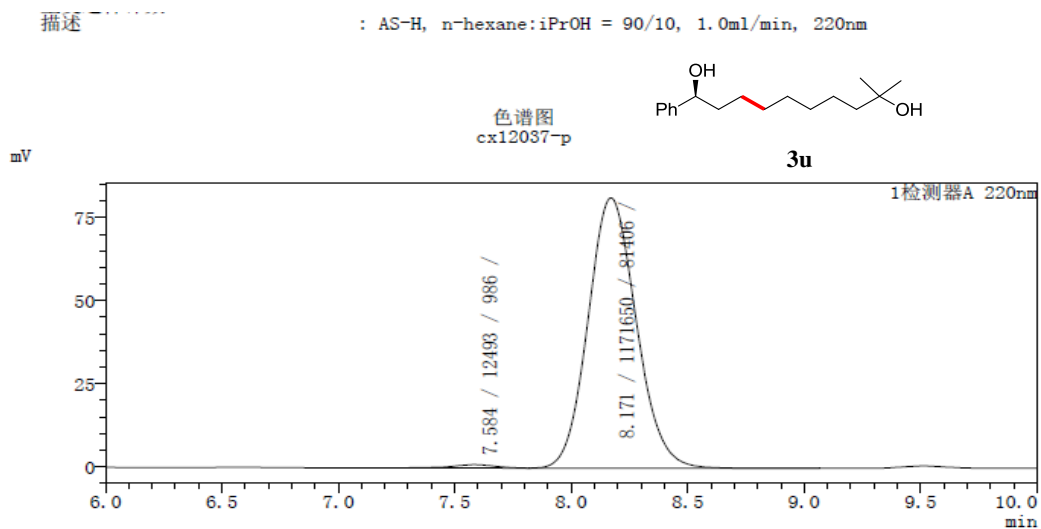

峰表

| 峰号 | 保留时间  | 面积      | 高度    | 标记 | 面积%     |
|----|-------|---------|-------|----|---------|
| 1  | 7.584 | 12493   | 986   | V  | 1.055   |
| 2  | 8.171 | 1171650 | 81406 |    | 98.945  |
| 总计 |       | 1184143 | 82392 |    | 100.000 |

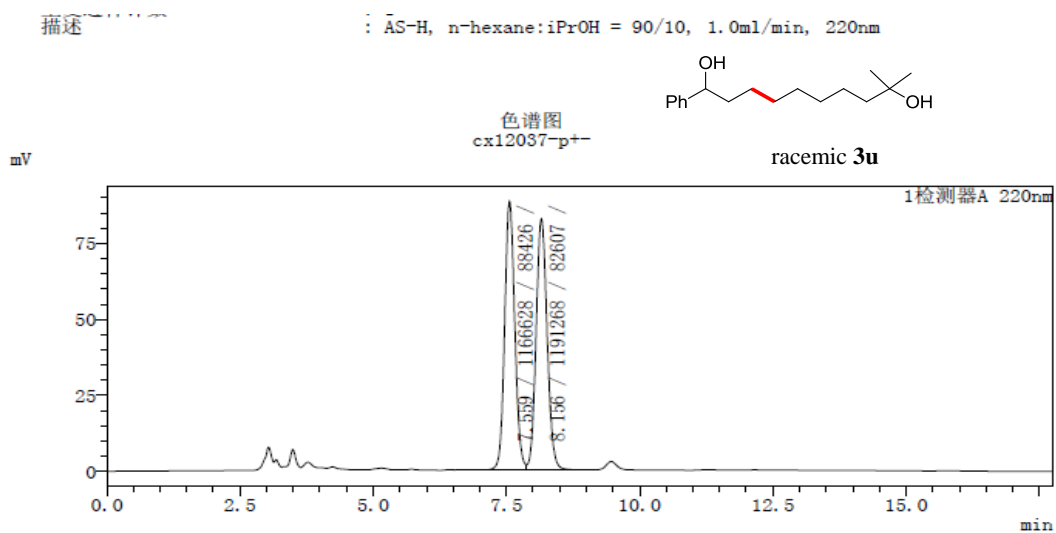

峰表

| 峰号 | 保留时间  | 面积      | 高度     | 标记 | 面积%     |
|----|-------|---------|--------|----|---------|
| 1  | 7.559 | 1166628 | 88426  |    | 49.478  |
| 2  | 8.156 | 1191268 | 82607  | V  | 50.522  |
| 总计 |       | 2357896 | 171033 |    | 100.000 |

Supplementary Figure 225. HPLC spectra for 3u

Translation of Chinese Characters in HPLC spectra to English

描述: HPLC Condition 检测器: Detector 峰号: Peak 面积: Area

色谱图: HPLC Spectra 高度: Height 标记: Note 总计: Total

峰表: Area Percent Report 保留时间: Remaining Time

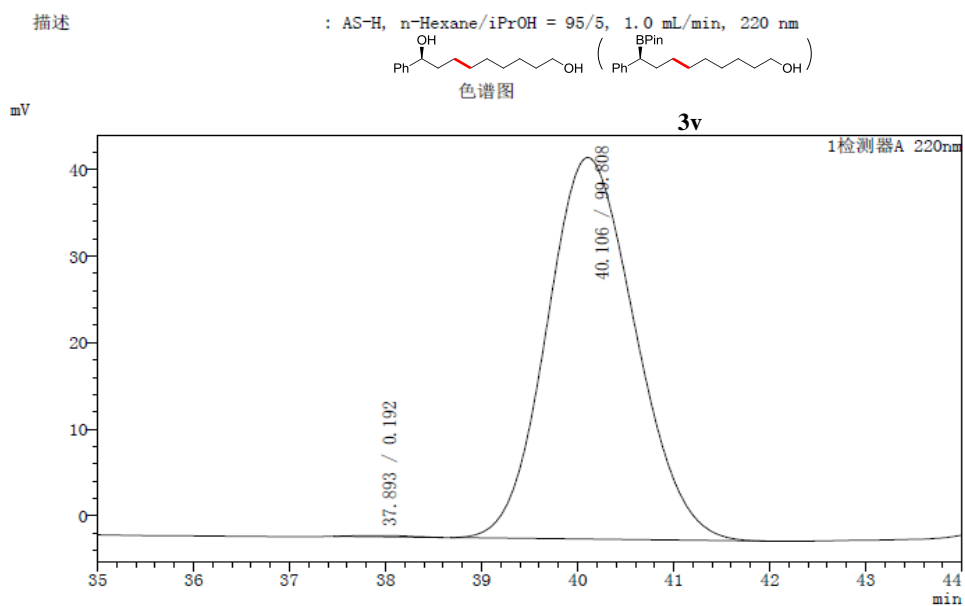

峰表

| 峰号 | 保留时间   | 面积      | 高度    | 标记 | 面积%     |
|----|--------|---------|-------|----|---------|
| 1  | 37.893 | 5406    | 131   |    | 0.192   |
| 2  | 40.106 | 2814484 | 44049 |    | 99.808  |
| 总计 |        | 2819890 | 44181 |    | 100.000 |

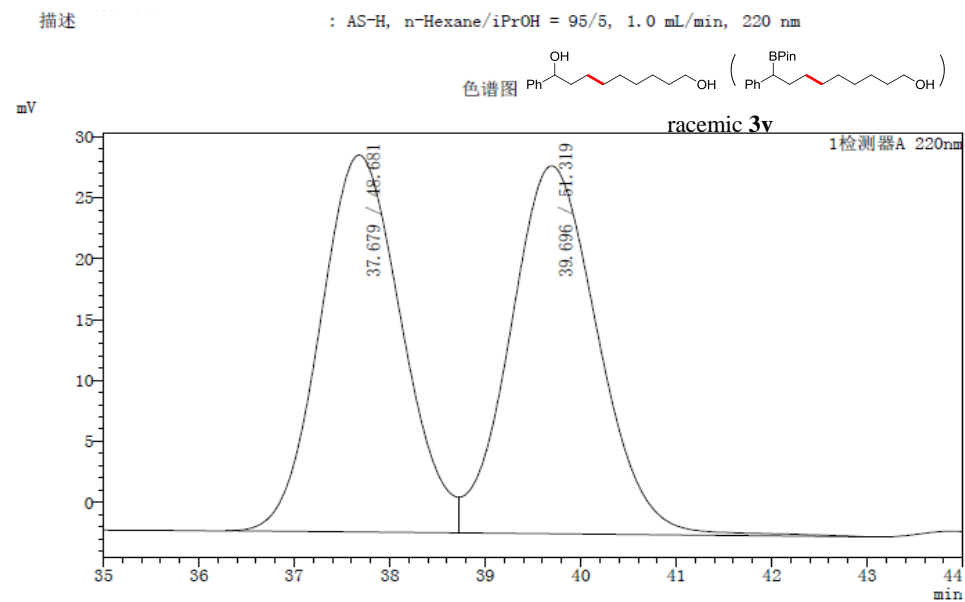

峰表

| 峰号 | 保留时间   | 面积      | 高度    | 标记 | 面积%     |
|----|--------|---------|-------|----|---------|
| 1  | 37.679 | 1830871 | 30951 |    | 48.681  |
| 2  | 39.696 | 1930102 | 30214 | V  | 51.319  |
| 总计 |        | 3760972 | 61165 |    | 100.000 |

Supplementary Figure 226. HPLC spectra for 3v

Translation of Chinese Characters in HPLC spectra to English

描述: HPLC Condition      检测器: Detector      峰号: Peak      面积: Area  
 色谱图: HPLC Spectra      高度: Height      标记: Note      总计: Total  
 峰表: Area Percent Report      保留时间: Remaining Time

描述 : AS-H, n-Hex/iPrOH = 80/20, 1.0 mL/min, 220 nm

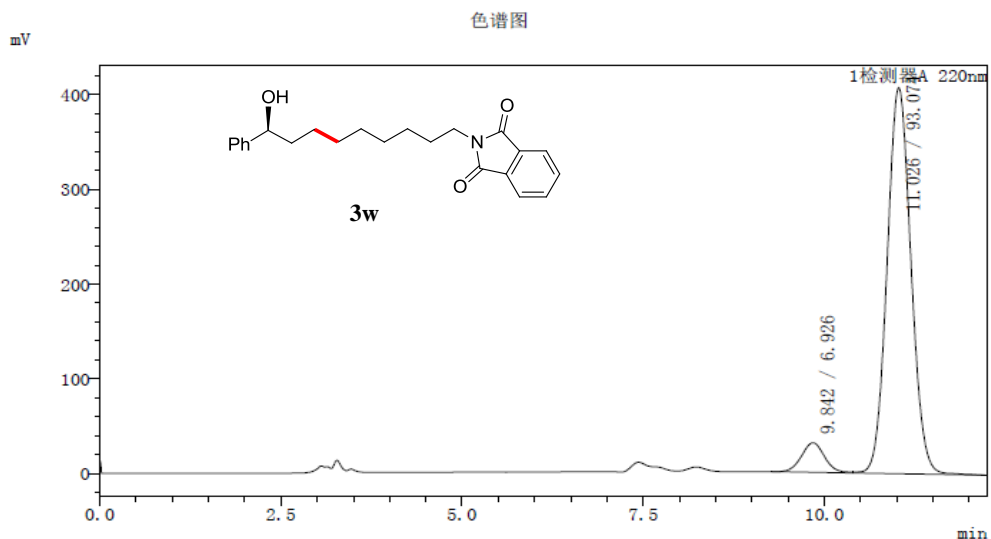

峰表

| 峰号 | 保留时间   | 面积       | 高度     | 标记 | 面积%     |
|----|--------|----------|--------|----|---------|
| 1  | 9.842  | 695440   | 31229  |    | 6.926   |
| 2  | 11.026 | 9346282  | 407776 | V  | 93.074  |
| 总计 |        | 10041722 | 439004 |    | 100.000 |

描述 : AS-H, n-Hex/iPrOH = 80/20, 1.0 mL/min, 220 nm

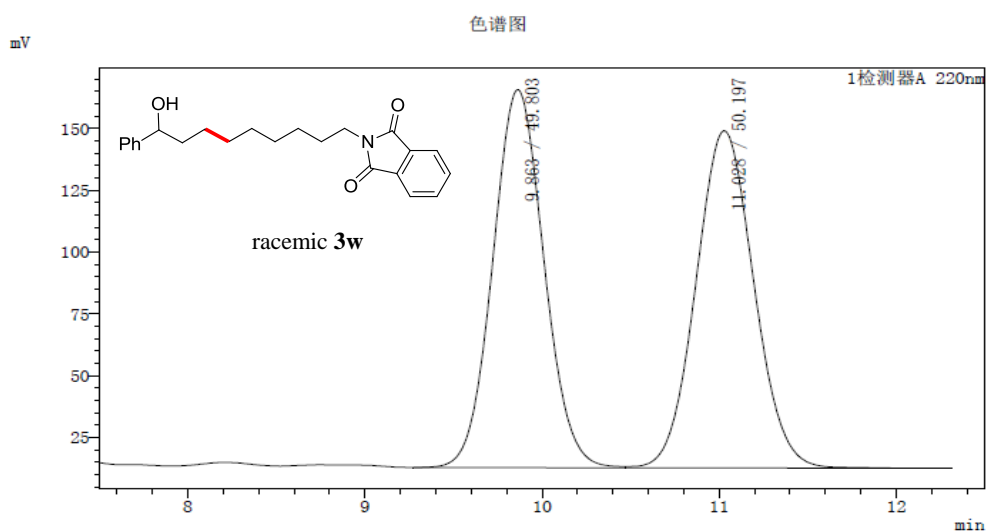

峰表

| 峰号 | 保留时间   | 面积      | 高度     | 标记 | 面积%     |
|----|--------|---------|--------|----|---------|
| 1  | 9.863  | 3078782 | 153087 |    | 49.803  |
| 2  | 11.028 | 3103185 | 136550 | V  | 50.197  |
| 总计 |        | 6181967 | 289637 |    | 100.000 |

Supplementary Figure 227. HPLC spectra for 3w

Translation of Chinese Characters in HPLC spectra to English

描述: HPLC Condition      检测器: Detector      峰号: Peak      面积: Area  
 色谱图: HPLC Spectra      高度: Height      标记: Note      总计: Total  
 峰表: Area Percent Report      保留时间: Remaining Time

描述: : AS-H, n-Hex/iPrOH = 98/2, 1.0 mL/min, 220 nm

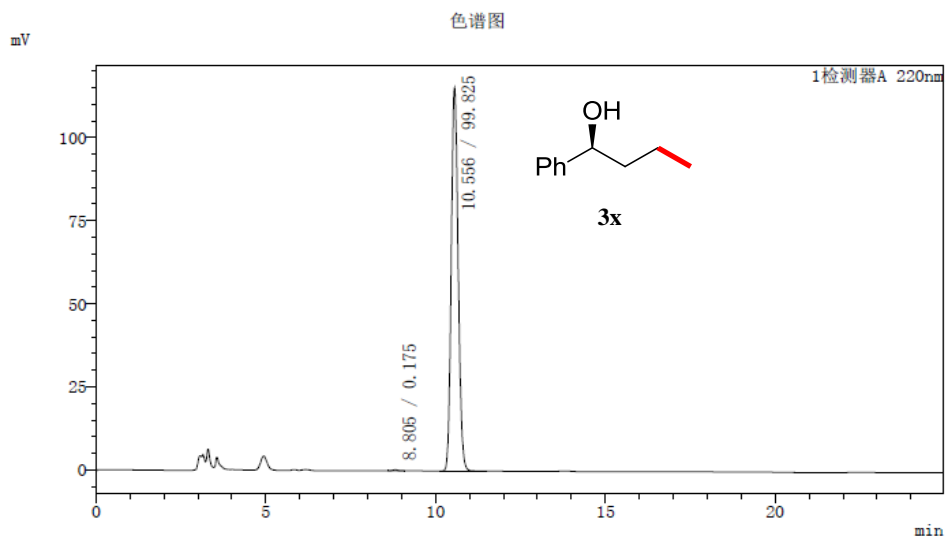

峰表

| 峰号 | 保留时间   | 面积      | 高度     | 标记 | 面积%     |
|----|--------|---------|--------|----|---------|
| 1  | 8.805  | 2866    | 255    |    | 0.175   |
| 2  | 10.556 | 1639089 | 115395 |    | 99.825  |
| 总计 |        | 1641954 | 115650 |    | 100.000 |

描述: : AS-H, n-Hex/iPrOH = 98/2, 1.0 mL/min, 220 nm

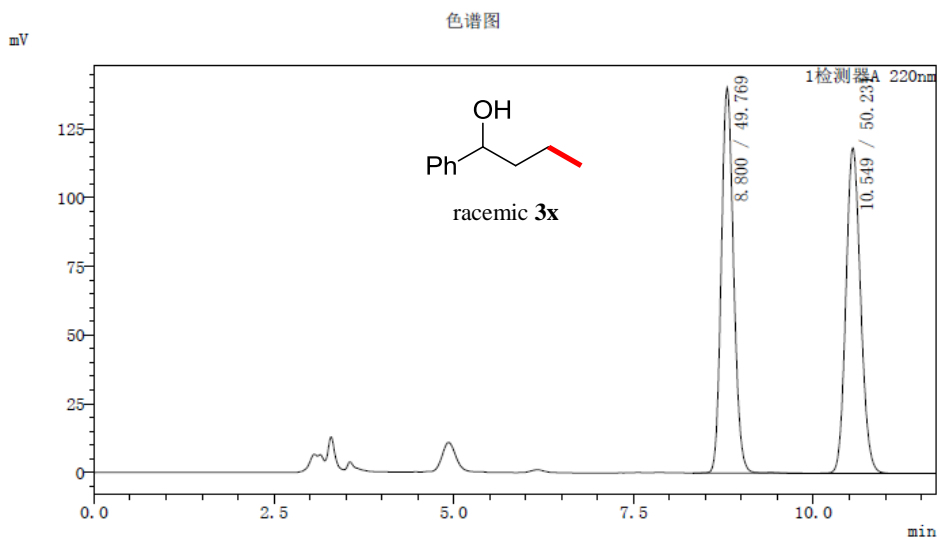

峰表

| 峰号 | 保留时间   | 面积      | 高度     | 标记 | 面积%     |
|----|--------|---------|--------|----|---------|
| 1  | 8.800  | 1665567 | 140246 | S  | 49.769  |
| 2  | 10.549 | 1681025 | 118453 |    | 50.231  |
| 总计 |        | 3346592 | 258699 |    | 100.000 |

Supplementary Figure 228. HPLC spectra for 3x

Translation of Chinese Characters in HPLC spectra to English

描述: HPLC Condition    检测器: Detector    峰号: Peak    面积: Area  
 色谱图: HPLC Spectra    高度: Height    标记: Note    总计: Total  
 峰表: Area Percent Report    保留时间: Remaining Time

描述 : OD-H, n-hexane:iPrOH = 98/2, 1.0 ml/min, 220 nm

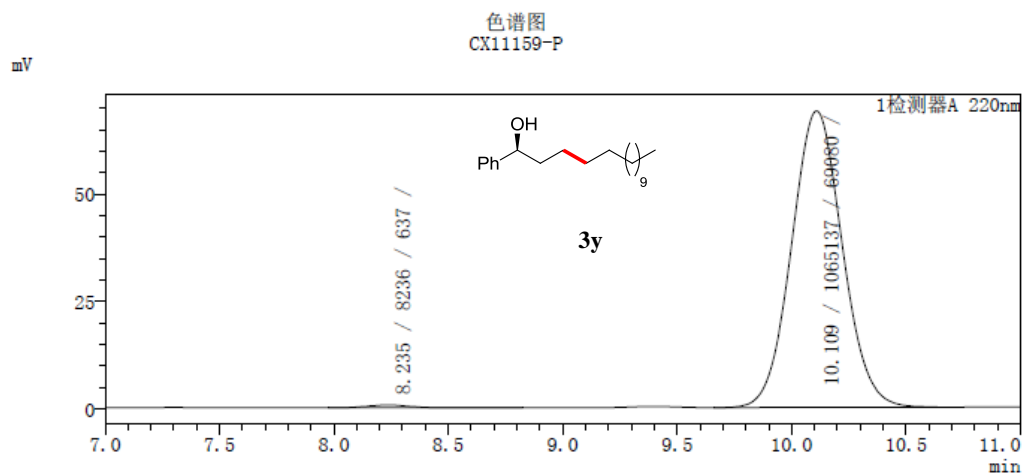

峰表

| 峰号 | 保留时间   | 面积      | 高度    | 标记 | 面积%     |
|----|--------|---------|-------|----|---------|
| 1  | 8.235  | 8236    | 637   |    | 0.767   |
| 2  | 10.109 | 1065137 | 69080 |    | 99.233  |
| 总计 |        | 1073372 | 69718 |    | 100.000 |

描述 : OD-H, n-hexane:iPrOH = 98/2, 1.0 ml/min, 220 nm

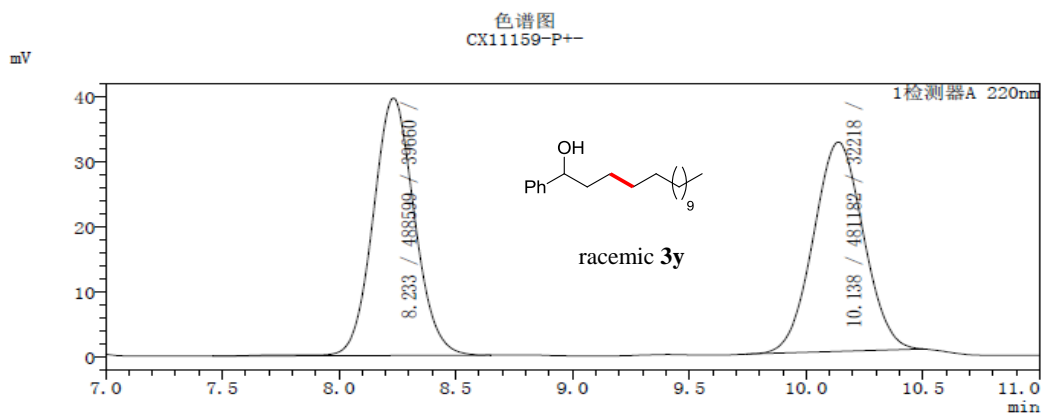

峰表

| 峰号 | 保留时间   | 面积     | 高度    | 标记 | 面积%     |
|----|--------|--------|-------|----|---------|
| 1  | 8.233  | 488599 | 39660 |    | 50.382  |
| 2  | 10.138 | 481182 | 32218 | M  | 49.618  |
| 总计 |        | 969781 | 71878 |    | 100.000 |

Supplementary Figure 229. HPLC spectra for **3y**

Translation of Chinese Characters in HPLC spectra to English

描述: HPLC Condition    检测器: Detector    峰号: Peak    面积: Area

色谱图: HPLC Spectra    高度: Height    标记: Note    总计: Total

峰表: Area Percent Report    保留时间: Remaining Time

描述: AS-H, n-hexane:iPrOH = 98/2, 1.0 ml/min, 220 nm

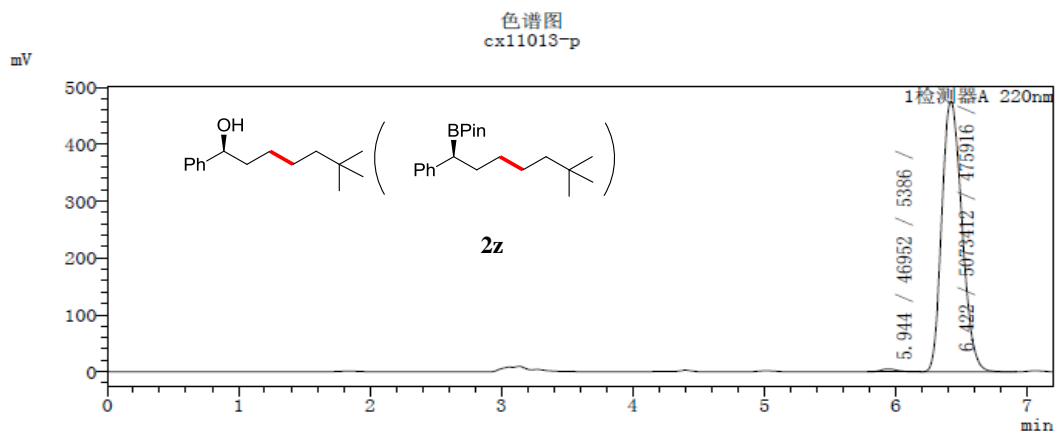

峰表

检测器A 220nm

| 峰号 | 保留时间  | 面积      | 高度     | 标记 | 面积%     |
|----|-------|---------|--------|----|---------|
| 1  | 5.944 | 46952   | 5386   |    | 0.917   |
| 2  | 6.422 | 5073412 | 475916 |    | 99.083  |
| 总计 |       | 5120364 | 481302 |    | 100.000 |

描述: AS-H, n-hexane:iPrOH = 98/2, 1.0 ml/min, 220 nm

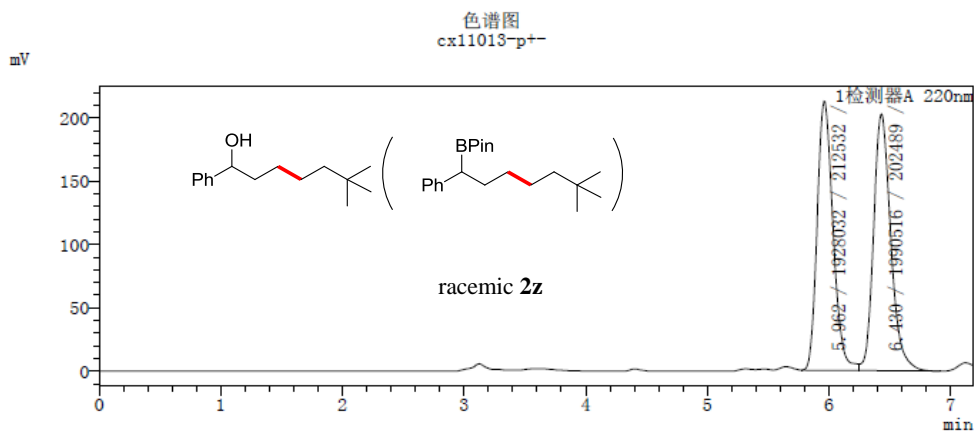

峰表

检测器A 220nm

| 峰号 | 保留时间  | 面积      | 高度     | 标记 | 面积%     |
|----|-------|---------|--------|----|---------|
| 1  | 5.962 | 1928032 | 212532 |    | 49.203  |
| 2  | 6.430 | 1990516 | 202489 | V  | 50.797  |
| 总计 |       | 3918548 | 415021 |    | 100.000 |

Supplementary Figure 230. HPLC spectra for 2z

Translation of Chinese Characters in HPLC spectra to English

描述: HPLC Condition      检测器: Detector      峰号: Peak      面积: Area  
 色谱图: HPLC Spectra      高度: Height      标记: Note      总计: Total  
 峰表: Area Percent Report      保留时间: Remaining Time

描述: AS-H, n-hexane:iPrOH = 98/2, 1.0 ml/min, 220 nm

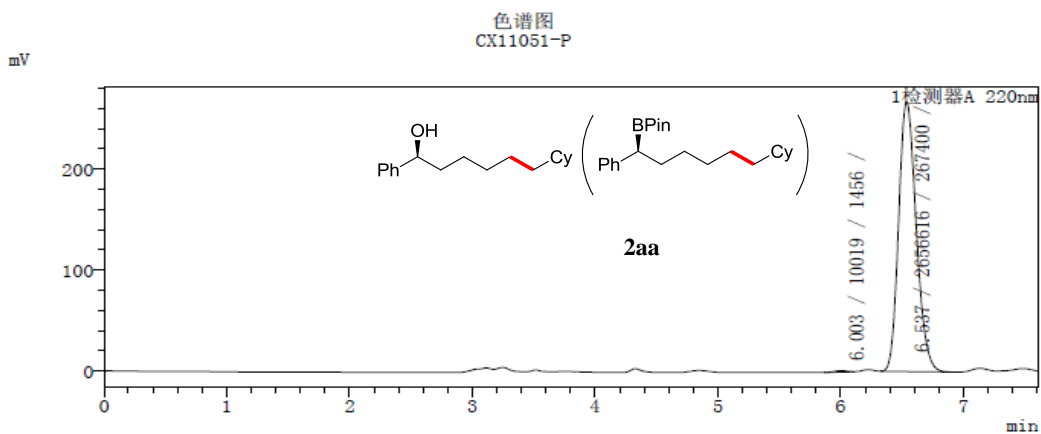

峰表

| 峰号 | 保留时间  | 面积      | 高度     | 标记 | 面积%     |
|----|-------|---------|--------|----|---------|
| 1  | 6.003 | 10019   | 1456   |    | 0.376   |
| 2  | 6.537 | 2656616 | 267400 |    | 99.624  |
| 总计 |       | 2666635 | 268856 |    | 100.000 |

描述: AS-H, n-hexane:iPrOH = 98/2, 1.0 ml/min, 220 nm

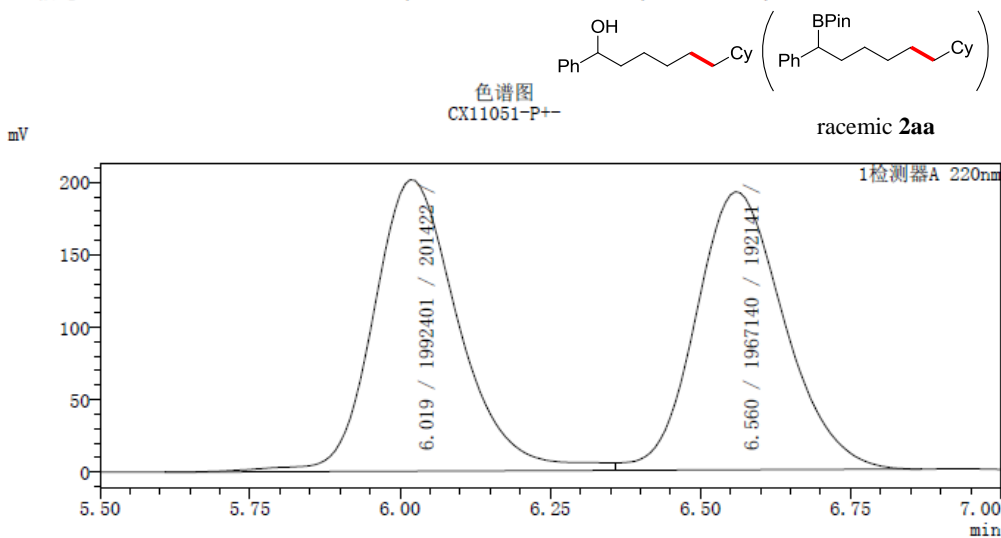

峰表

| 峰号 | 保留时间  | 面积      | 高度     | 标记 | 面积%     |
|----|-------|---------|--------|----|---------|
| 1  | 6.019 | 1992401 | 201422 |    | 50.319  |
| 2  | 6.560 | 1967140 | 192141 | V  | 49.681  |
| 总计 |       | 3959541 | 393562 |    | 100.000 |

Supplementary Figure 231. HPLC spectra for 2aa



Translation of Chinese Characters in HPLC spectra to English

描述: HPLC Condition    检测器: Detector    峰号: Peak    面积: Area  
 色谱图: HPLC Spectra    高度: Height    标记: Note    总计: Total  
 峰表: Area Percent Report    保留时间: Remaining Time

描述 : OD-H, n-hexane:iPrOH = 98/2, 1.0 ml/min, 220 nm

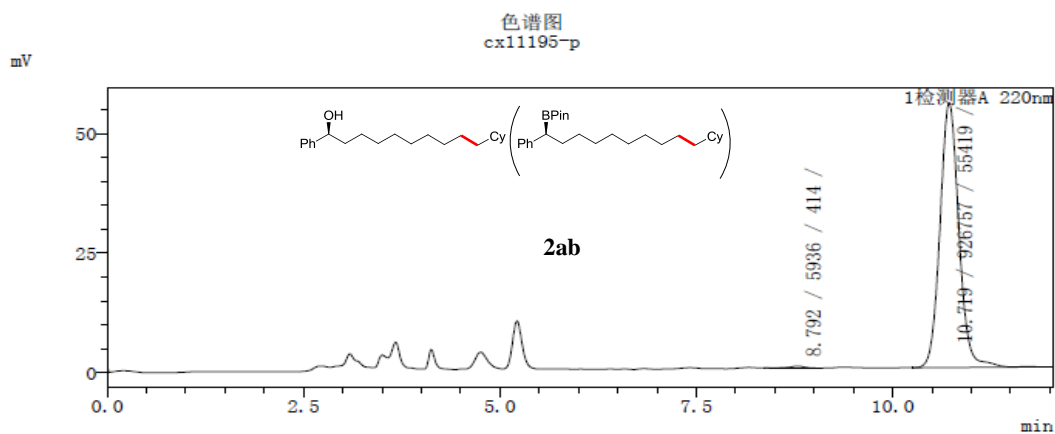

峰表

| 峰号 | 保留时间   | 面积     | 高度    | 标记 | 面积%     |
|----|--------|--------|-------|----|---------|
| 1  | 8.792  | 5936   | 414   |    | 0.636   |
| 2  | 10.719 | 926757 | 55419 | SV | 99.364  |
| 总计 |        | 932693 | 55833 |    | 100.000 |

描述 : OD-H, n-hexane:iPrOH = 98/2, 1.0 ml/min, 220 nm

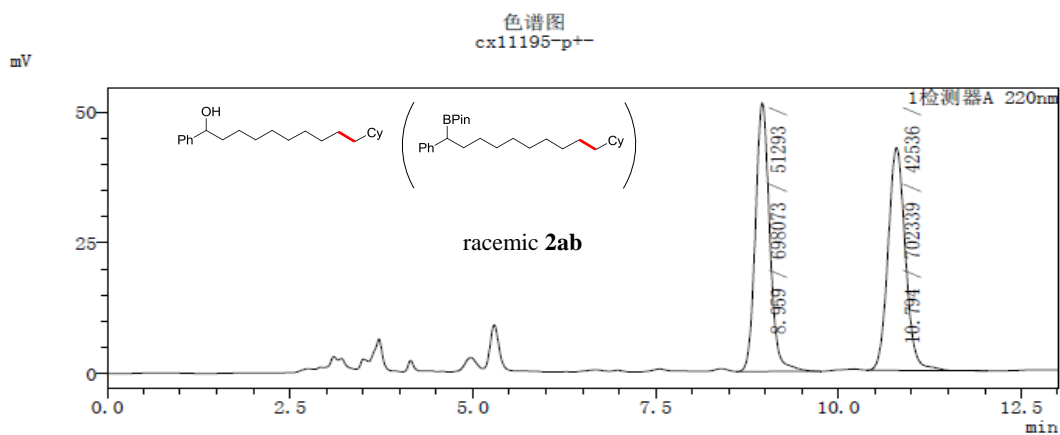

峰表

| 峰号 | 保留时间   | 面积      | 高度    | 标记 | 面积%     |
|----|--------|---------|-------|----|---------|
| 1  | 8.959  | 698073  | 51293 |    | 49.848  |
| 2  | 10.794 | 702339  | 42536 | S  | 50.152  |
| 总计 |        | 1400413 | 93829 |    | 100.000 |

Supplementary Figure 232. HPLC spectra for 2ab

Translation of Chinese Characters in HPLC spectra to English

描述: HPLC Condition    检测器: Detector    峰号: Peak    面积: Area  
 色谱图: HPLC Spectra    高度: Height    标记: Note    总计: Total  
 峰表: Area Percent Report    保留时间: Remaining Time

描述 : AS-H, n-Hex/iPrOH = 99.1/0.9, 1.0 mL/min, 220 nm

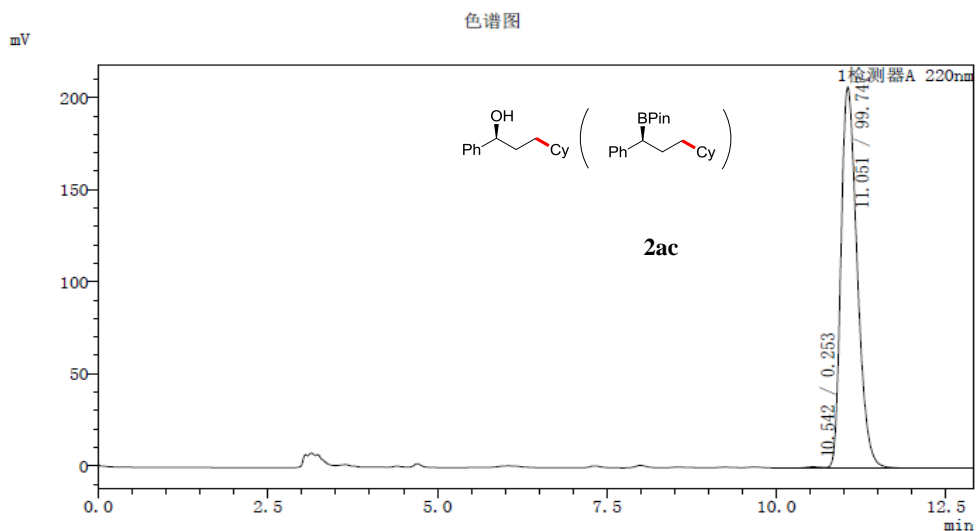

峰表

| 峰号 | 保留时间   | 面积      | 高度     | 标记 | 面积%     |
|----|--------|---------|--------|----|---------|
| 1  | 10.542 | 8723    | 641    |    | 0.253   |
| 2  | 11.051 | 3436872 | 207014 | V  | 99.747  |
| 总计 |        | 3445595 | 207655 |    | 100.000 |

描述 : AS-H, n-Hex/iPrOH = 99.1/0.9, 1.0 mL/min, 220 nm

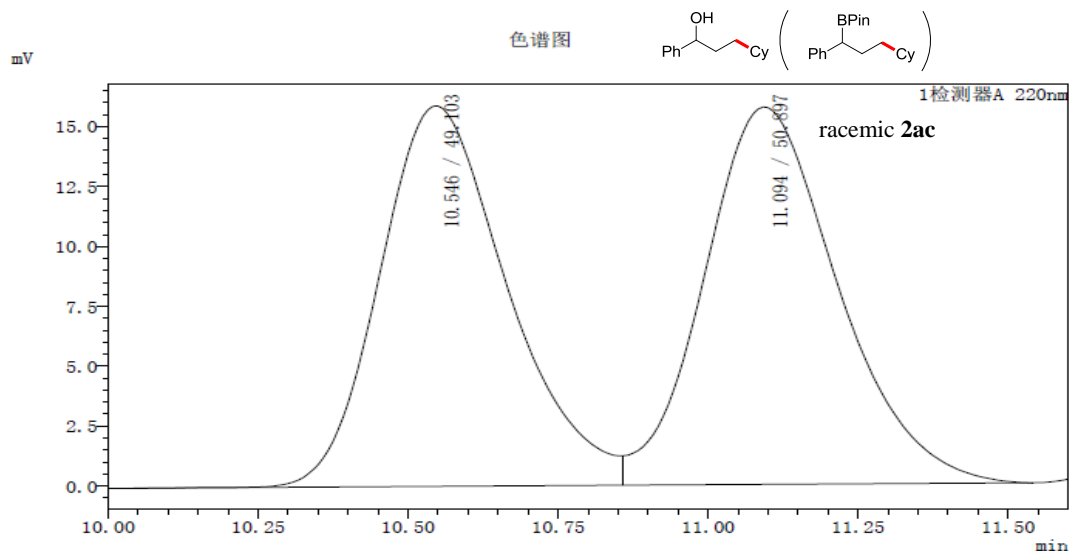

峰表

| 峰号 | 保留时间   | 面积     | 高度    | 标记 | 面积%     |
|----|--------|--------|-------|----|---------|
| 1  | 10.546 | 234621 | 15877 |    | 49.103  |
| 2  | 11.094 | 243196 | 15755 | V  | 50.897  |
| 总计 |        | 477817 | 31632 |    | 100.000 |

Supplementary Figure 233. HPLC spectra for 2ac

Translation of Chinese Characters in HPLC spectra to English

描述: HPLC Condition 检测器: Detector 峰号: Peak 面积: Area

色谱图: HPLC Spectra 高度: Height 标记: Note 总计: Total

峰表: Area Percent Report 保留时间: Remaining Time

描述 : AS-H, n-hexane/iPrOH = 98/2, 1.0 mL/min, 220 nm

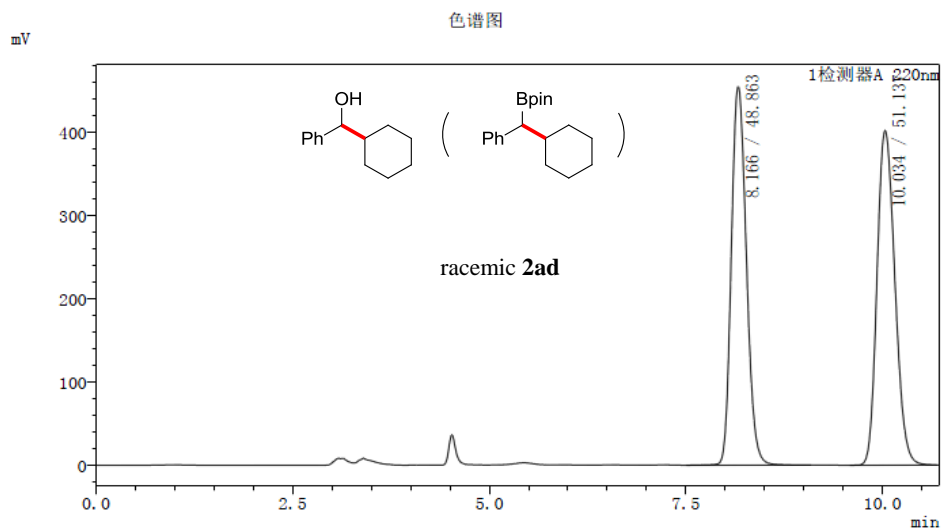

峰表

| 峰号 | 保留时间   | 面积       | 高度     | 标记 | 面积%     |
|----|--------|----------|--------|----|---------|
| 1  | 8.166  | 6068979  | 455798 |    | 48.863  |
| 2  | 10.034 | 6351493  | 401952 |    | 51.137  |
| 总计 |        | 12420473 | 857750 |    | 100.000 |

描述 : AS-H, n-hexane/iPrOH = 98/2, 1.0 mL/min, 220 nm

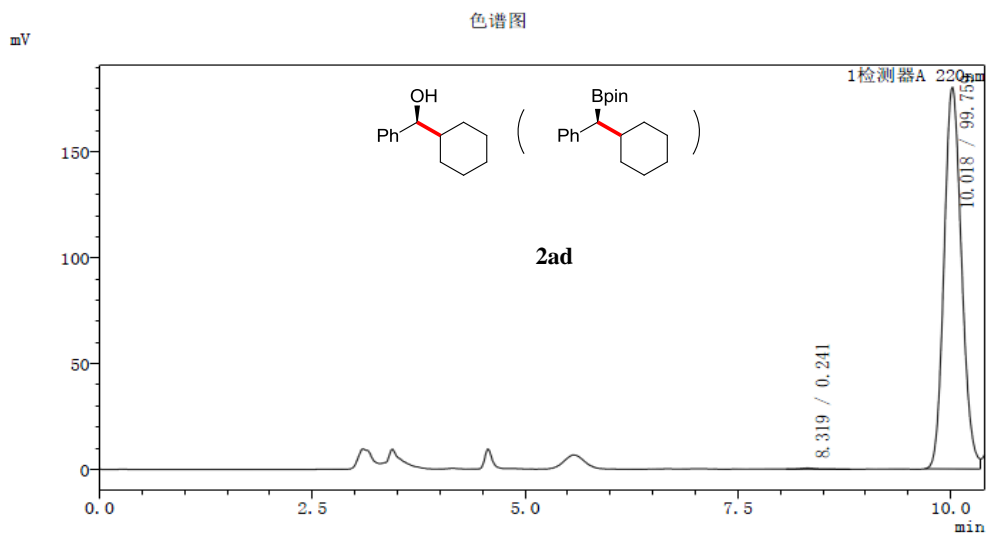

峰表

| 峰号 | 保留时间   | 面积      | 高度     | 标记 | 面积%     |
|----|--------|---------|--------|----|---------|
| 1  | 8.319  | 6225    | 468    |    | 0.241   |
| 2  | 10.018 | 2576306 | 180554 | M  | 99.759  |
| 总计 |        | 2582531 | 181022 |    | 100.000 |

**Supplementary Figure 234. HPLC spectra for 2ad**

Translation of Chinese Characters in HPLC spectra to English

描述: HPLC Condition      检测器: Detector      峰号: Peak      面积: Area  
 色谱图: HPLC Spectra      高度: Height      标记: Note      总计: Total  
 峰表: Area Percent Report      保留时间: Remaining Time

描述: 0j-H, n-hexane:iPrOH = 98/2, 1.0 ml/min, 220 nm

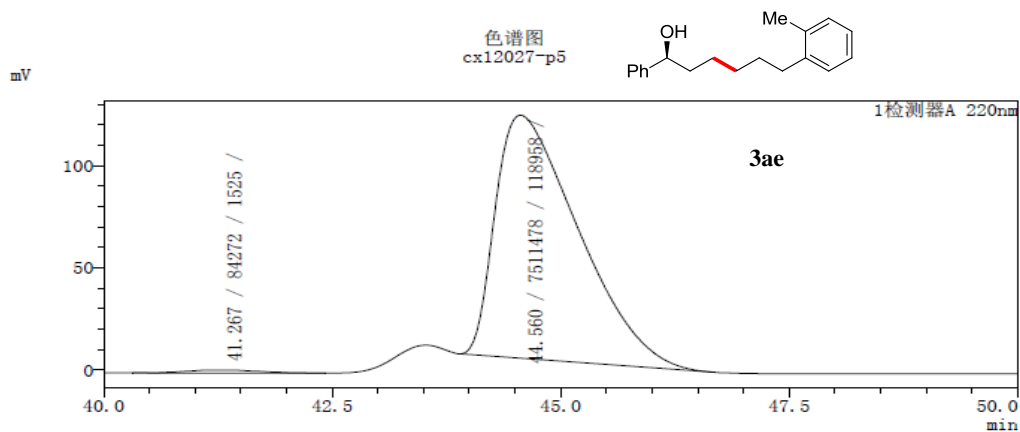

峰表

| 峰号 | 保留时间   | 面积      | 高度     | 标记 | 面积%     |
|----|--------|---------|--------|----|---------|
| 1  | 41.267 | 84272   | 1525   |    | 1.109   |
| 2  | 44.560 | 7511478 | 118958 |    | 98.891  |
| 总计 |        | 7595750 | 120483 |    | 100.000 |

描述: 0j-H, n-hexane:iPrOH = 98/2, 1.0 ml/min, 220 nm

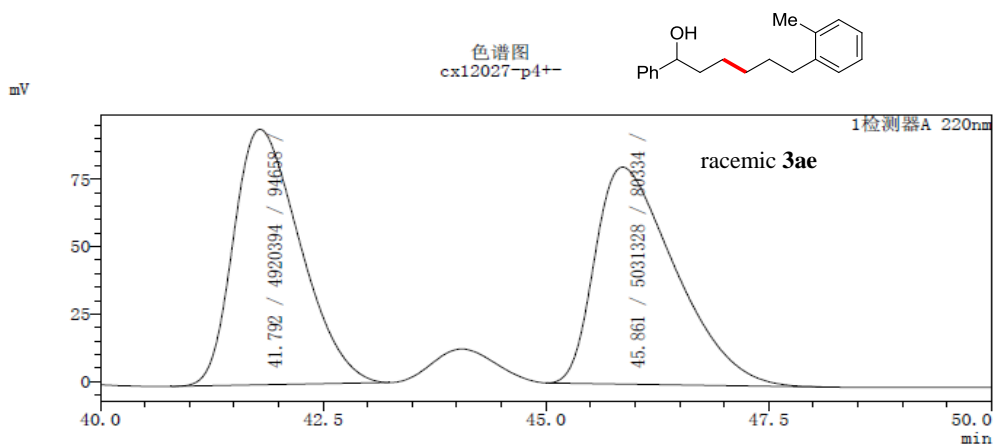

峰表

| 峰号 | 保留时间   | 面积      | 高度     | 标记 | 面积%     |
|----|--------|---------|--------|----|---------|
| 1  | 41.792 | 4920394 | 94658  |    | 49.443  |
| 2  | 45.861 | 5031328 | 80334  |    | 50.557  |
| 总计 |        | 9951722 | 174993 |    | 100.000 |

Supplementary Figure 235. HPLC spectra for 3ae

Translation of Chinese Characters in HPLC spectra to English

描述: HPLC Condition      检测器: Detector      峰号: Peak      面积: Area  
 色谱图: HPLC Spectra      高度: Height      标记: Note      总计: Total  
 峰表: Area Percent Report      保留时间: Remaining Time

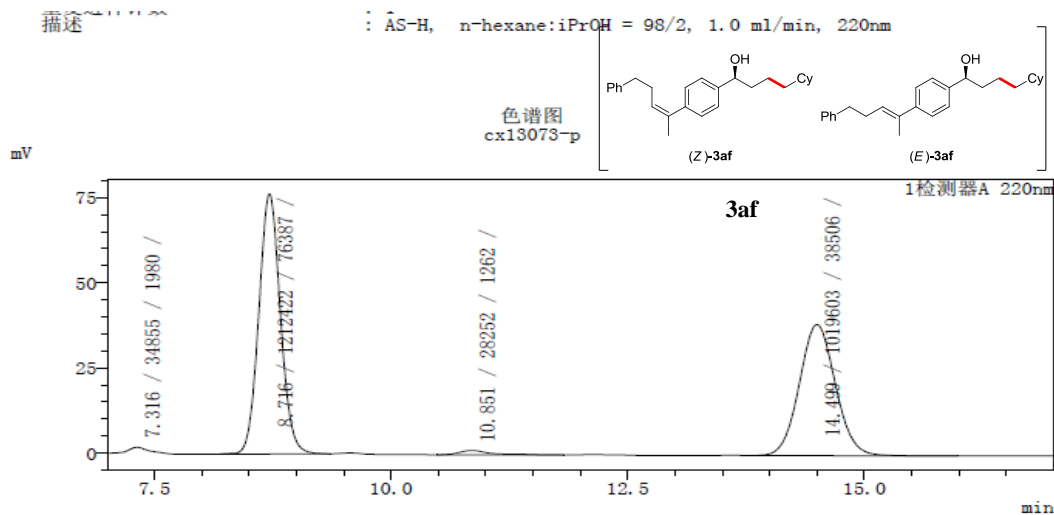

检测器A 220nm

峰表

| 峰号 | 保留时间   | 面积      | 高度     | 标记 | 面积%     |
|----|--------|---------|--------|----|---------|
| 1  | 7.316  | 34855   | 1980   |    | 1.519   |
| 2  | 8.716  | 1212422 | 76387  |    | 52.826  |
| 3  | 10.851 | 28252   | 1262   |    | 1.231   |
| 4  | 14.499 | 1019603 | 38506  |    | 44.425  |
| 总计 |        | 2295131 | 118135 |    | 100.000 |

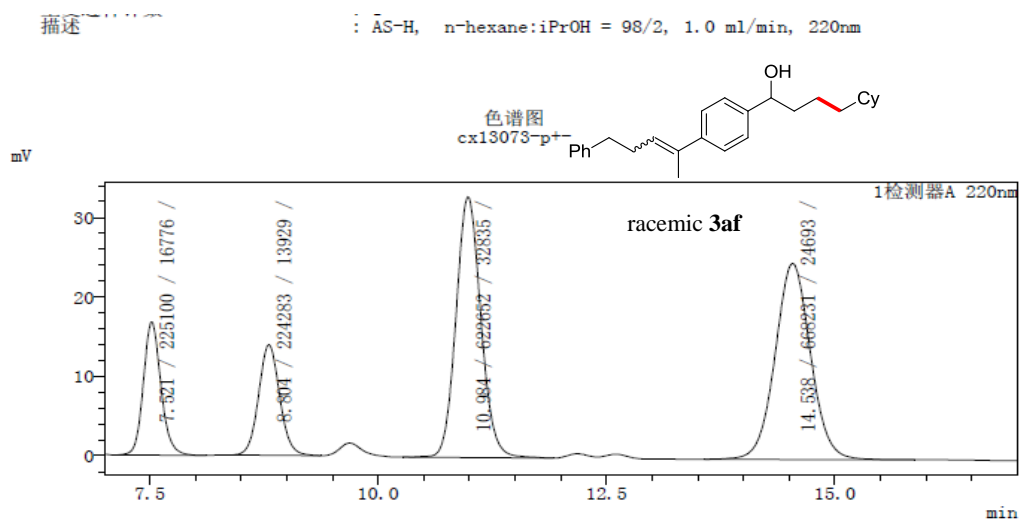

检测器A 220nm

峰表

| 峰号 | 保留时间   | 面积      | 高度    | 标记 | 面积%     |
|----|--------|---------|-------|----|---------|
| 1  | 7.521  | 225100  | 16776 |    | 12.935  |
| 2  | 8.804  | 224283  | 13929 |    | 12.888  |
| 3  | 10.984 | 622652  | 32835 |    | 35.779  |
| 4  | 14.538 | 668231  | 24693 |    | 38.398  |
| 总计 |        | 1740266 | 88232 |    | 100.000 |

Supplementary Figure 236. HPLC spectra for 3af

Translation of Chinese Characters in HPLC spectra to English

描述: HPLC Condition      检测器: Detector      峰号: Peak      面积: Area  
 色谱图: HPLC Spectra      高度: Height      标记: Note      总计: Total  
 峰表: Area Percent Report      保留时间: Remaining Time

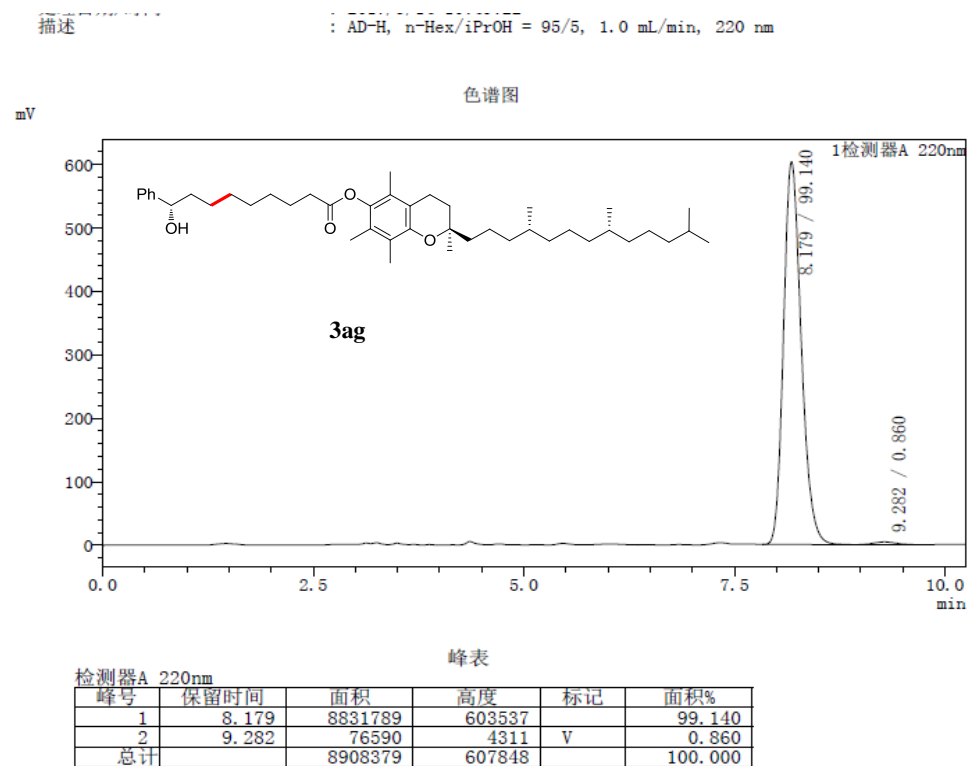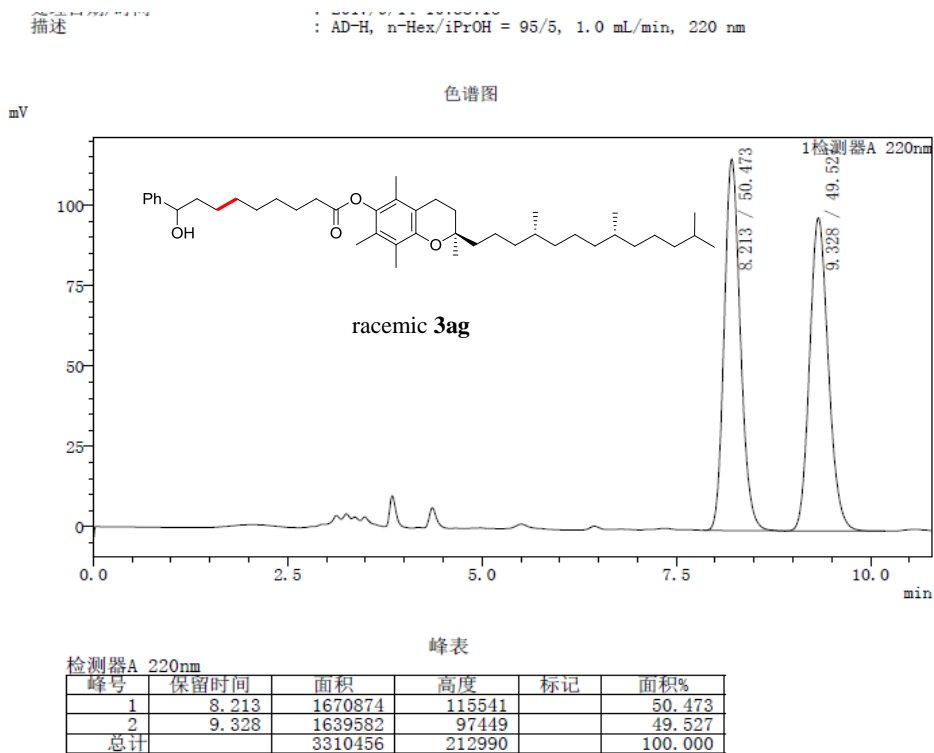

Supplementary Figure 237. HPLC spectra for 3ag

Translation of Chinese Characters in HPLC spectra to English

描述: HPLC Condition    检测器: Detector    峰号: Peak    面积: Area  
 色谱图: HPLC Spectra    高度: Height    标记: Note    总计: Total  
 峰表: Area Percent Report    保留时间: Remaining Time

描述: AS-H, n-hexane:iPrOH = 98/2, 1.0 ml/min, 220 nm

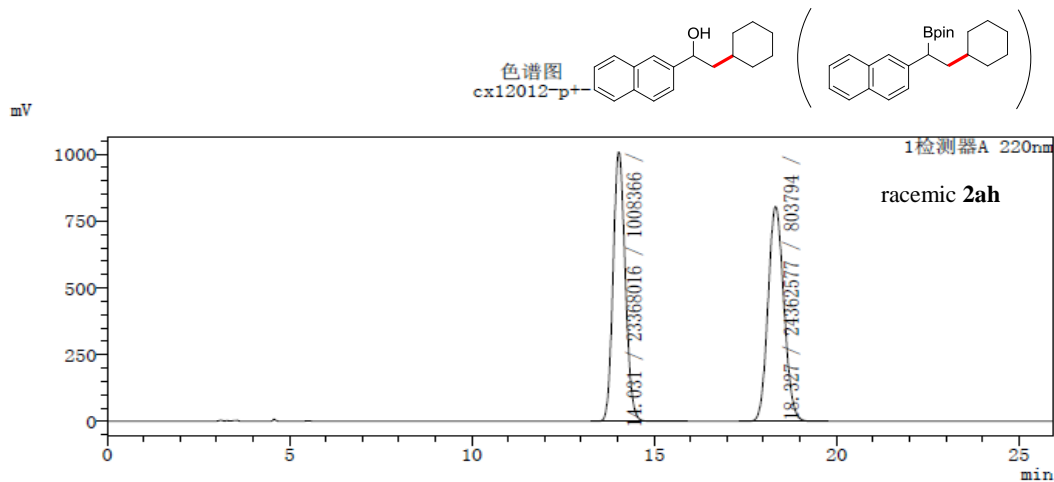

峰表

| 峰号 | 保留时间   | 面积       | 高度      | 标记 | 面积%     |
|----|--------|----------|---------|----|---------|
| 1  | 14.031 | 23368016 | 1008366 |    | 48.958  |
| 2  | 18.327 | 24362577 | 803794  |    | 51.042  |
| 总计 |        | 47730593 | 1812160 |    | 100.000 |

描述: AS-H, n-hexane:iPrOH = 98/2, 1.0 ml/min, 220 nm

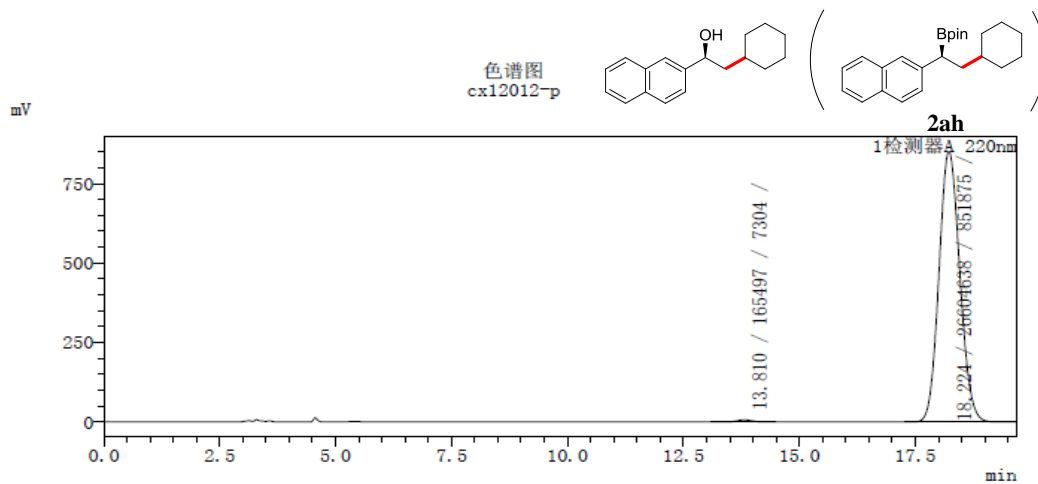

峰表

| 峰号 | 保留时间   | 面积       | 高度     | 标记 | 面积%     |
|----|--------|----------|--------|----|---------|
| 1  | 13.810 | 165497   | 7304   |    | 0.618   |
| 2  | 18.224 | 26604638 | 851875 |    | 99.382  |
| 总计 |        | 26770135 | 859179 |    | 100.000 |

Supplementary Figure 238. HPLC spectra for 2ah

Translation of Chinese Characters in HPLC spectra to English

描述: HPLC Condition      检测器: Detector      峰号: Peak      面积: Area  
 色谱图: HPLC Spectra      高度: Height      标记: Note      总计: Total  
 峰表: Area Percent Report      保留时间: Remaining Time

描述: : OJ-H, n-hexane:iPrOH = 99/1, 0.5 ml/min, 220 nm

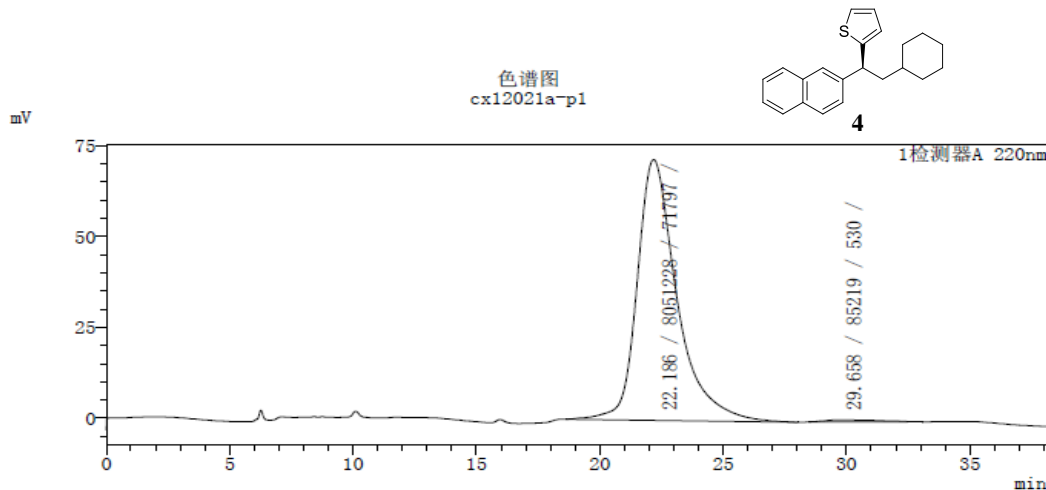

峰表

| 峰号 | 保留时间   | 面积      | 高度    | 标记 | 面积%     |
|----|--------|---------|-------|----|---------|
| 1  | 22.186 | 8051228 | 71797 |    | 98.953  |
| 2  | 29.658 | 85219   | 530   | M  | 1.047   |
| 总计 |        | 8136447 | 72327 |    | 100.000 |

描述: : OJ-H, n-hexane:iPrOH = 99/1, 0.5 ml/min, 220 nm

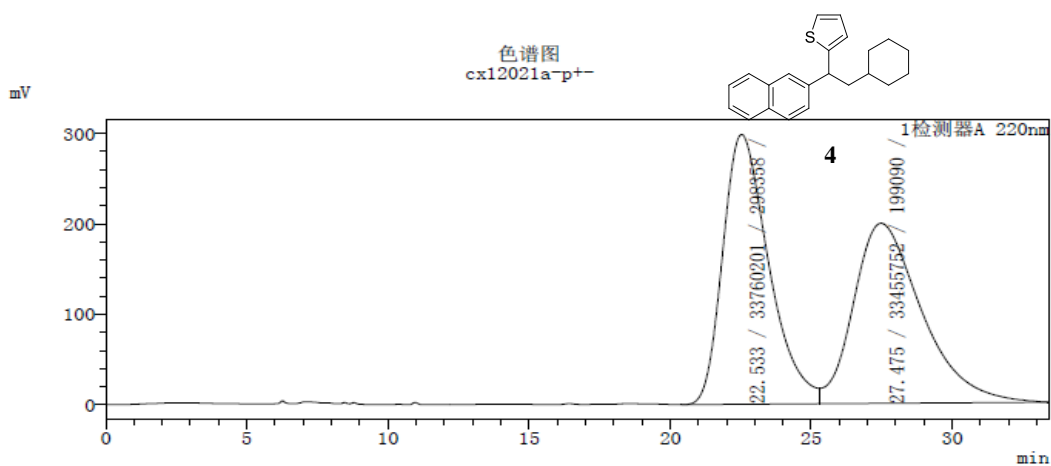

峰表

| 峰号 | 保留时间   | 面积       | 高度     | 标记 | 面积%     |
|----|--------|----------|--------|----|---------|
| 1  | 22.533 | 33760201 | 298358 |    | 50.226  |
| 2  | 27.475 | 33455752 | 199090 | V  | 49.774  |
| 总计 |        | 67215953 | 497448 |    | 100.000 |

Supplementary Figure 239. HPLC spectra for 4



Translation of Chinese Characters in HPLC spectra to English

描述: HPLC Condition    检测器: Detector    峰号: Peak    面积: Area  
 色谱图: HPLC Spectra    高度: Height    标记: Note    总计: Total  
 峰表: Area Percent Report    保留时间: Remaining Time

描述 : OJ-H, n-hexane:iPrOH = 99/1, 0.5 ml/min, 220 nm

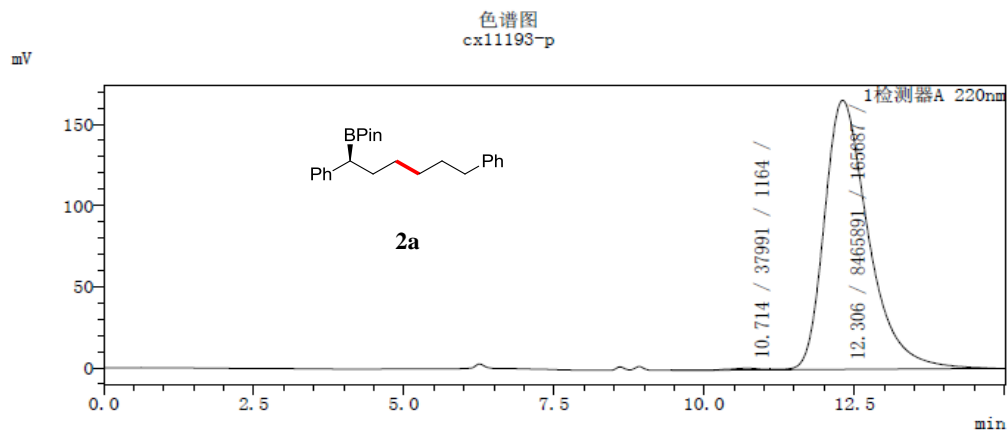

峰表

| 峰号 | 保留时间   | 面积      | 高度     | 标记 | 面积%     |
|----|--------|---------|--------|----|---------|
| 1  | 10.714 | 37991   | 1164   |    | 0.447   |
| 2  | 12.306 | 8465891 | 165687 | V  | 99.553  |
| 总计 |        | 8503882 | 166851 |    | 100.000 |

描述 : OJ-H, n-hexane:iPrOH = 99/1, 0.5 ml/min, 220 nm

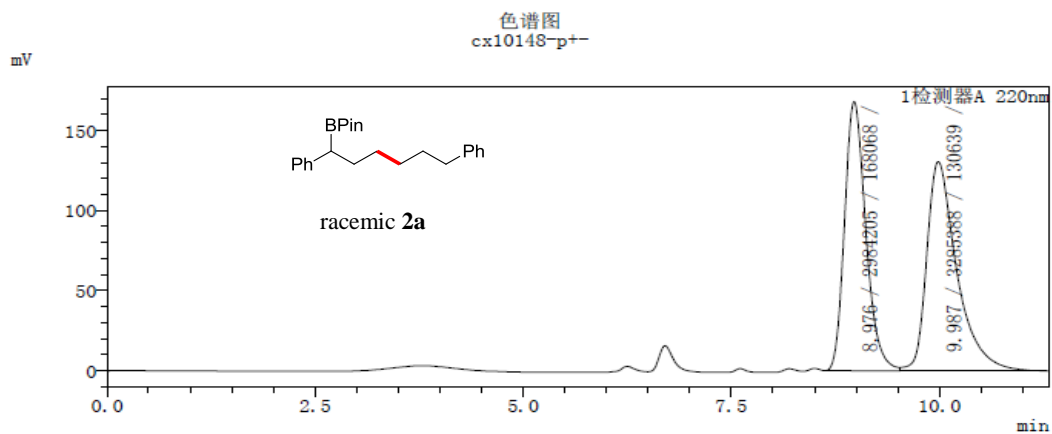

峰表

| 峰号 | 保留时间  | 面积      | 高度     | 标记 | 面积%     |
|----|-------|---------|--------|----|---------|
| 1  | 8.976 | 2984205 | 168068 |    | 47.598  |
| 2  | 9.987 | 3285388 | 130639 | V  | 52.402  |
| 总计 |       | 6269593 | 298707 |    | 100.000 |

Supplementary Figure 240. HPLC spectra for **2a** (gram scale reaction)

Translation of Chinese Characters in HPLC spectra to English

描述: HPLC Condition      检测器: Detector      峰号: Peak      面积: Area  
 色谱图: HPLC Spectra      高度: Height      标记: Note      总计: Total  
 峰表: Area Percent Report      保留时间: Remaining Time

描述: : AD-H, n-Hexane/iPrOH = 98/2, 1.0 mL/min, 220 nm

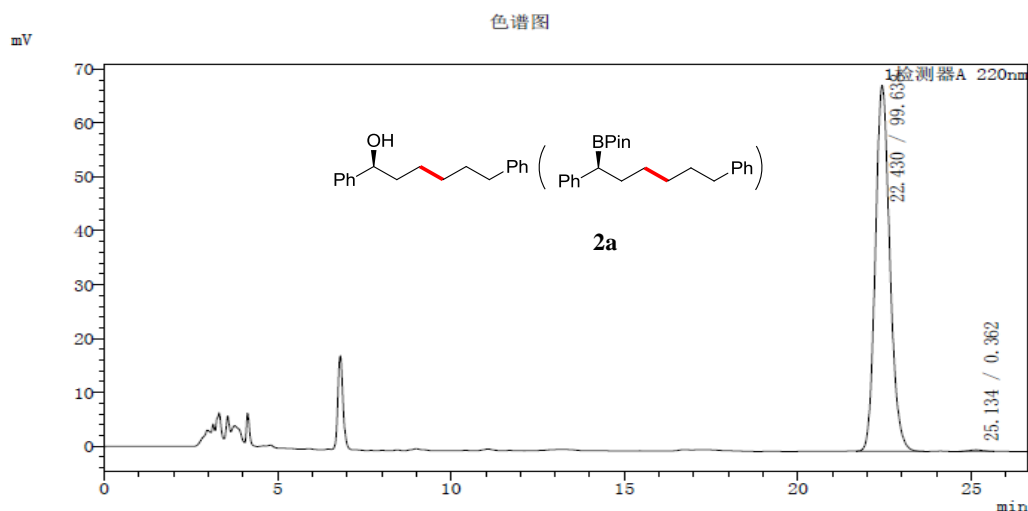

峰表

| 峰号 | 保留时间   | 面积      | 高度    | 标记 | 面积%     |
|----|--------|---------|-------|----|---------|
| 1  | 22.430 | 1974890 | 67896 | V  | 99.638  |
| 2  | 25.134 | 7169    | 261   |    | 0.362   |
| 总计 |        | 1982059 | 68157 |    | 100.000 |

描述: : AD-H, n-Hexane/iPrOH = 98/2, 1.0 mL/min, 220 nm

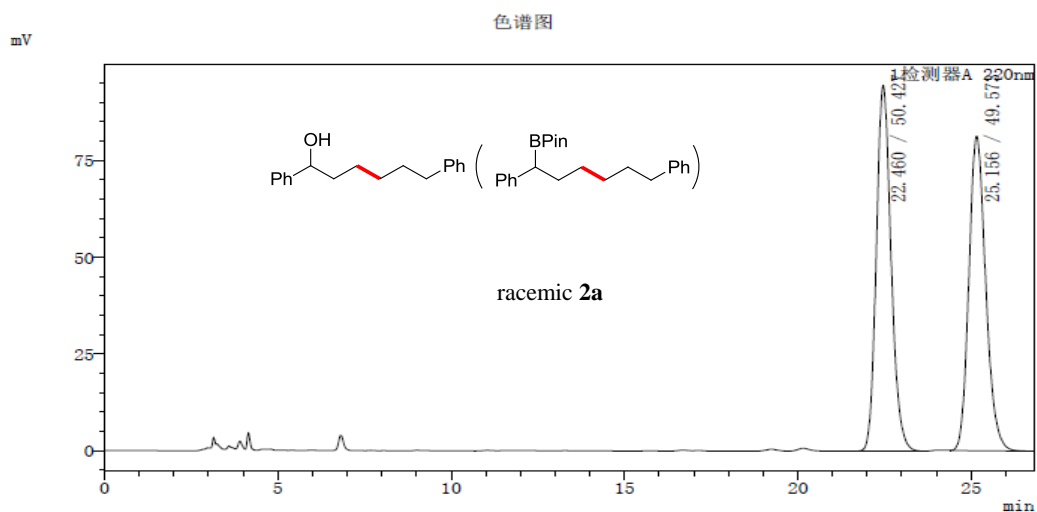

峰表

| 峰号 | 保留时间   | 面积      | 高度     | 标记 | 面积%     |
|----|--------|---------|--------|----|---------|
| 1  | 22.460 | 2798402 | 94561  |    | 50.427  |
| 2  | 25.156 | 2751021 | 81383  |    | 49.573  |
| 总计 |        | 5549423 | 175943 |    | 100.000 |

**Supplementary Figure 241.** HPLC spectra for **2a** (utilization of alkene isomers)

Translation of Chinese Characters in HPLC spectra to English

描述: HPLC Condition      检测器: Detector      峰号: Peak      面积: Area  
 色谱图: HPLC Spectra      高度: Height      标记: Note      总计: Total  
 峰表: Area Percent Report      保留时间: Remaining Time

描述: AS-H, n-hexane:iPrOH = 98/2, 1.0ml/min, 220nm

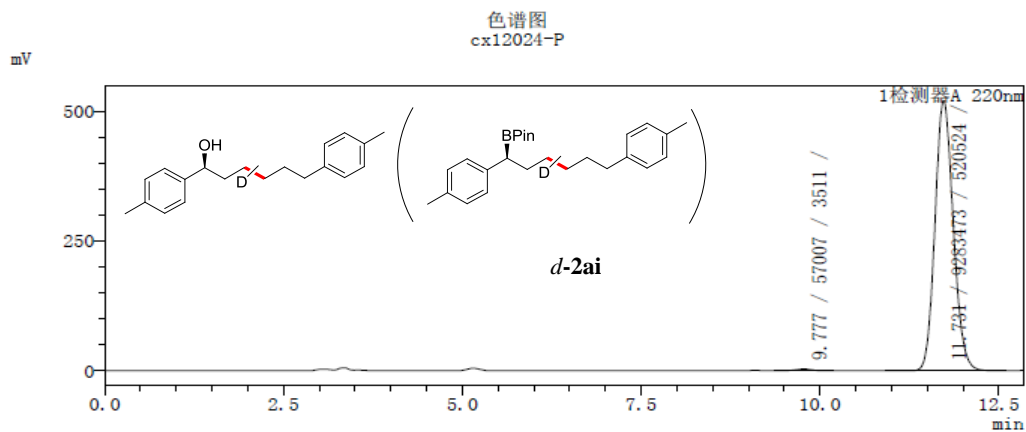

峰表

| 峰号 | 保留时间   | 面积      | 高度     | 标记 | 面积%     |
|----|--------|---------|--------|----|---------|
| 1  | 9.777  | 57007   | 3511   |    | 0.610   |
| 2  | 11.731 | 9283473 | 520524 |    | 99.390  |
| 总计 |        | 9340480 | 524035 |    | 100.000 |

描述: AS-H, n-hexane:iPrOH = 98/2, 1.0ml/min, 220nm

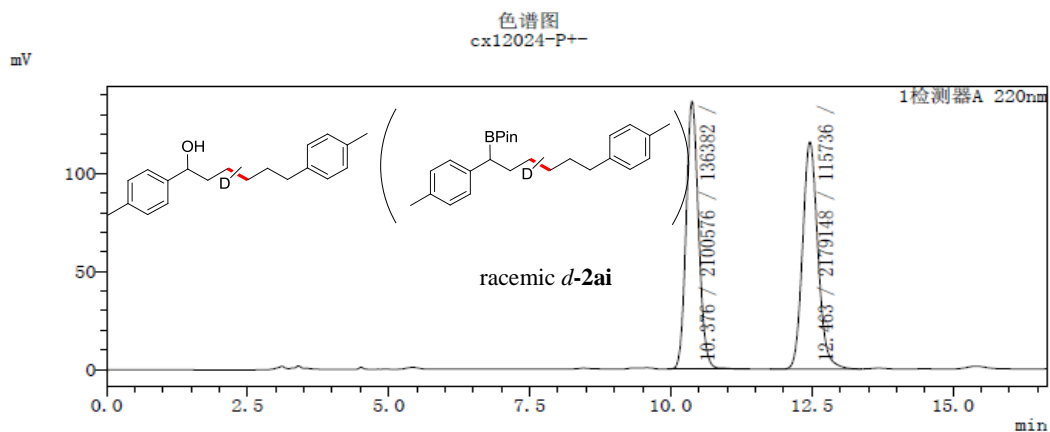

峰表

| 峰号 | 保留时间   | 面积      | 高度     | 标记 | 面积%     |
|----|--------|---------|--------|----|---------|
| 1  | 10.376 | 2100576 | 136382 |    | 49.082  |
| 2  | 12.463 | 2179148 | 115736 |    | 50.918  |
| 总计 |        | 4279724 | 252118 |    | 100.000 |

Supplementary Figure 242. HPLC spectra for *d-2ai*

Translation of Chinese Characters in HPLC spectra to English

描述: HPLC Condition 检测器: Detector 峰号: Peak 面积: Area

色谱图: HPLC Spectra 高度: Height 标记: Note 总计: Total

峰表: Area Percent Report 保留时间: Remaining Time

描述 : 0J-H\*2, n-hexane/iPrOH = 100/0, 0.5 mL/min, 220 nm

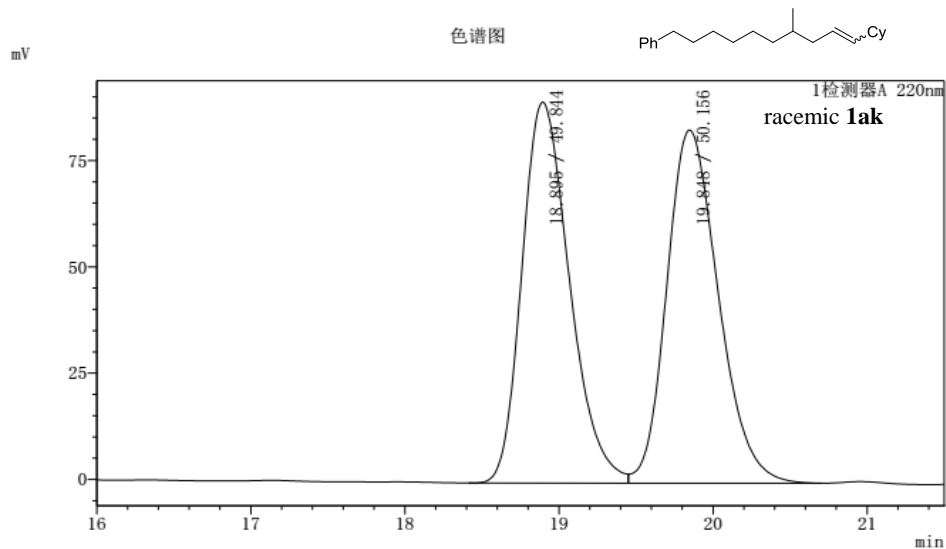

峰表

| 峰号 | 保留时间   | 面积      | 高度     | 标记 | 面积%     |
|----|--------|---------|--------|----|---------|
| 1  | 18.895 | 1921522 | 89585  |    | 49.844  |
| 2  | 19.848 | 1933524 | 83060  | V  | 50.156  |
| 总计 |        | 3855046 | 172645 |    | 100.000 |

描述 : 0J-H\*2, n-hexane/iPrOH = 100/0, 0.5 mL/min, 220 nm

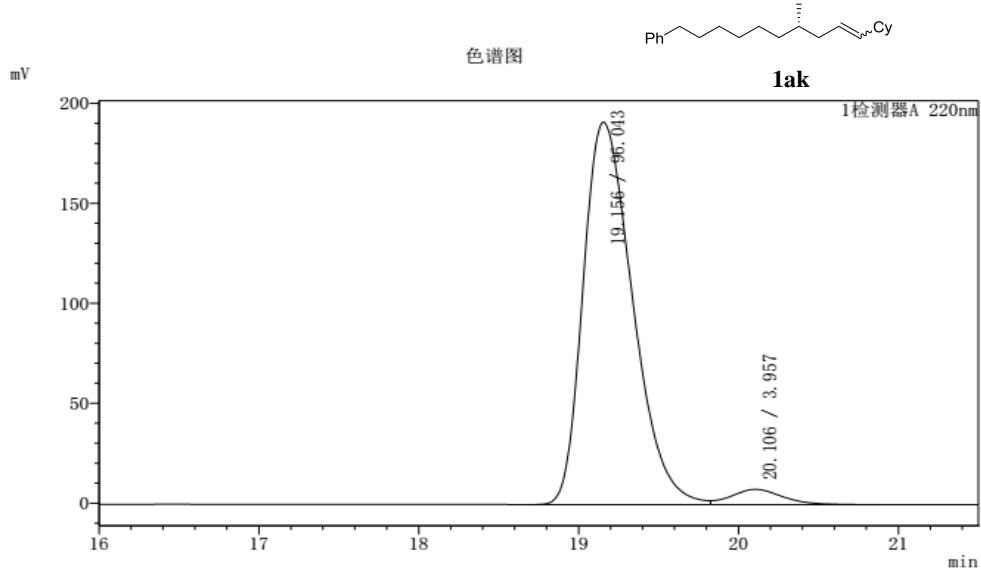

峰表

| 峰号 | 保留时间   | 面积      | 高度     | 标记 | 面积%     |
|----|--------|---------|--------|----|---------|
| 1  | 19.156 | 4111879 | 191295 |    | 96.043  |
| 2  | 20.106 | 169405  | 7624   | V  | 3.957   |
| 总计 |        | 4281284 | 198919 |    | 100.000 |

Supplementary Figure 243. HPLC spectra for 1ak

Translation of Chinese Characters in HPLC spectra to English

描述: HPLC Condition 检测器: Detector 峰号: Peak 面积: Area

色谱图: HPLC Spectra 高度: Height 标记: Note 总计: Total

峰表: Area Percent Report 保留时间: Remaining Time

描述 : OD-H , n-hexane/iPrOH = 98/2, 1.0 mL/min, 220 nm

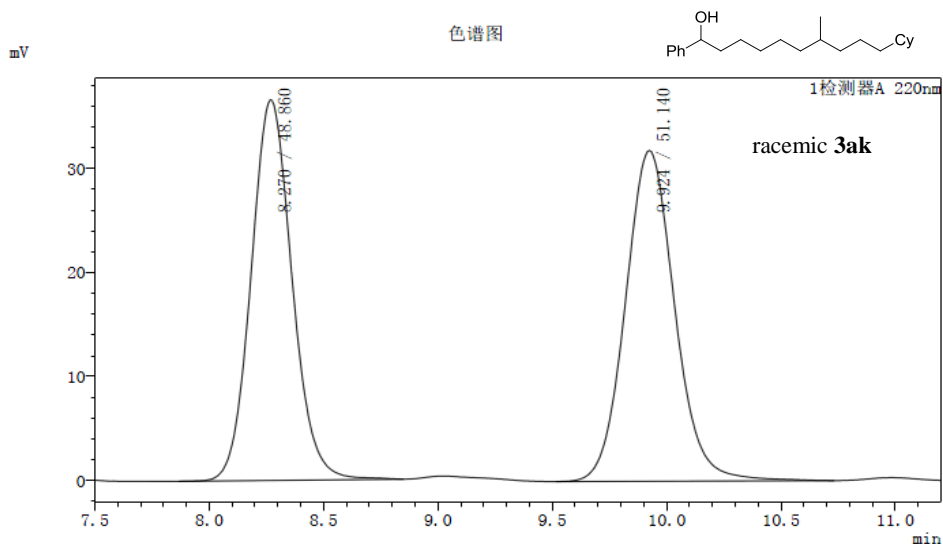

峰表

| 峰号 | 保留时间  | 面积     | 高度    | 标记 | 面积%     |
|----|-------|--------|-------|----|---------|
| 1  | 8.270 | 455438 | 36611 |    | 48.860  |
| 2  | 9.924 | 476687 | 31806 |    | 51.140  |
| 总计 |       | 932124 | 68417 |    | 100.000 |

描述 : OD-H , n-hexane/iPrOH = 98/2, 1.0 mL/min, 220 nm

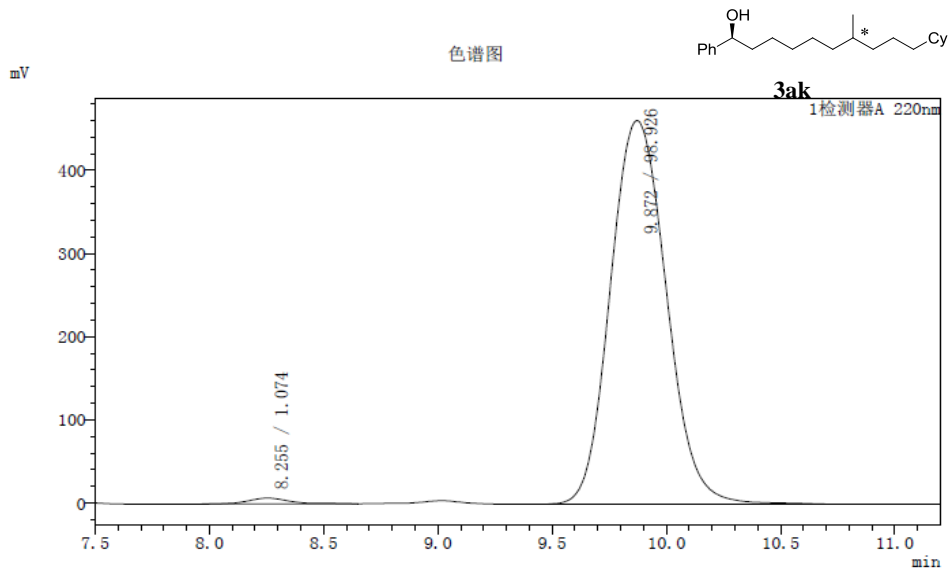

峰表

| 峰号 | 保留时间  | 面积      | 高度     | 标记 | 面积%     |
|----|-------|---------|--------|----|---------|
| 1  | 8.255 | 85386   | 6897   |    | 1.074   |
| 2  | 9.872 | 7867627 | 460977 |    | 98.926  |
| 总计 |       | 7953013 | 467874 |    | 100.000 |

Supplementary Figure 244. HPLC spectra for 3ak

Translation of Chinese Characters in HPLC spectra to English

描述: HPLC Condition 检测器: Detector 峰号: Peak 面积: Area

色谱图: HPLC Spectra 高度: Height 标记: Note 总计: Total

峰表: Area Percent Report 保留时间: Remaining Time

描述 : OJ-H\*3 , n-hexane/iPrOH = 100/0, 0.25 mL/min, 220 nm

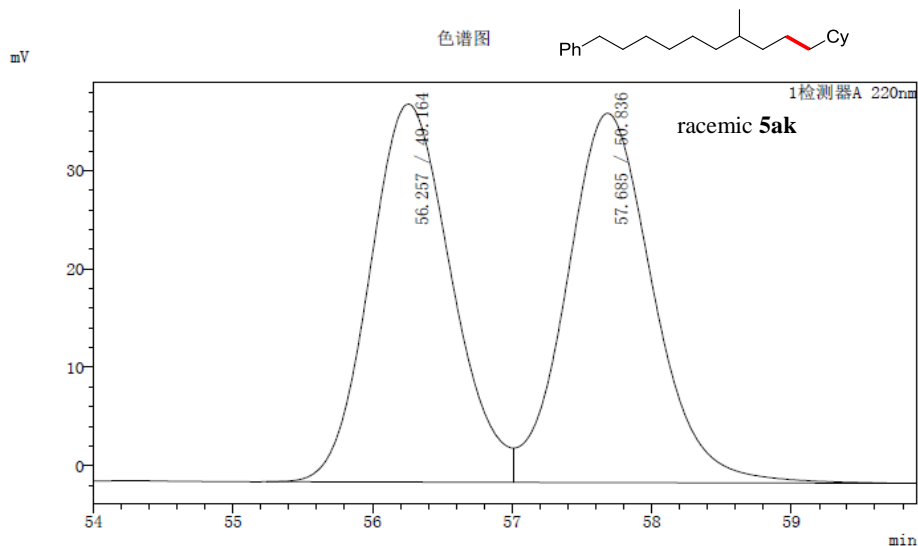

峰表

| 峰号 | 保留时间   | 面积      | 高度    | 标记 | 面积%     |
|----|--------|---------|-------|----|---------|
| 1  | 56.257 | 1560687 | 38444 |    | 49.164  |
| 2  | 57.685 | 1613732 | 37560 | V  | 50.836  |
| 总计 |        | 3174420 | 76004 |    | 100.000 |

描述 : OJ-H\*3 , n-hexane/iPrOH = 100/0, 0.25 mL/min, 220 nm

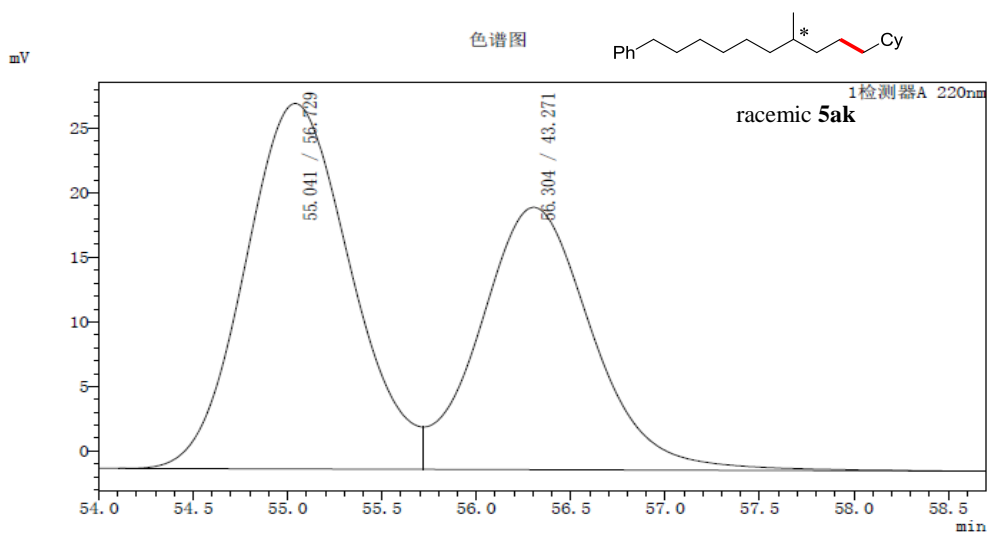

峰表

| 峰号 | 保留时间   | 面积      | 高度    | 标记 | 面积%     |
|----|--------|---------|-------|----|---------|
| 1  | 55.041 | 1099414 | 28305 |    | 56.729  |
| 2  | 56.304 | 838605  | 20318 | V  | 43.271  |
| 总计 |        | 1938019 | 48623 |    | 100.000 |

Supplementary Figure 245. HPLC spectra for 5ak

## Supplementary Tables

**Supplementary Table 1** Optimization studies on different ligands, solvent.

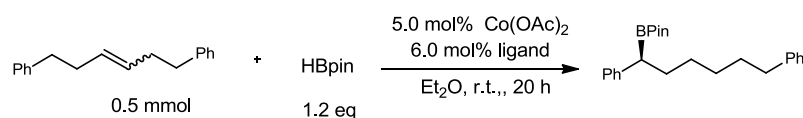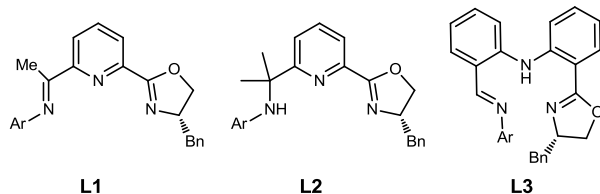

Ar = 2,6-di*i*PrC<sub>6</sub>H<sub>3</sub>

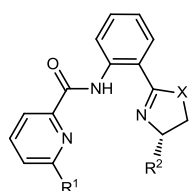

**L4:** R<sup>1</sup> = H, R<sup>2</sup> = Bn, X = O  
**L5:** R<sup>1</sup> = Me, R<sup>2</sup> = Bn, X = O  
**L6:** R<sup>1</sup> = Me, R<sup>2</sup> = Bn, X = NPh  
**L7:** R<sup>1</sup> = Me, R<sup>2</sup> = *i*Pr, X = NPh  
**L8:** R<sup>1</sup> = Me, R<sup>2</sup> = *t*Bu, X = NPh  
**L9:** R<sup>1</sup> = Me, R<sup>2</sup> = Ph, X = NPh

**Lsa:** R<sup>1</sup> = H, R<sup>2</sup> = Ph, X = O  
**Lsb:** R<sup>1</sup> = H, R<sup>2</sup> = indenyl, X = O  
**Lsc:** R<sup>1</sup> = H, R<sup>2</sup> = *i*Pr, X = O  
**Lsd:** R<sup>1</sup> = H, R<sup>2</sup> = *t*Bu, X = O  
**Lse:** R<sup>1</sup> = Me, R<sup>2</sup> = Ph, X = O  
**Lsf:** R<sup>1</sup> = Me, R<sup>2</sup> = indenyl, X = O  
**Lsg:** R<sup>1</sup> = Me, R<sup>2</sup> = *i*Pr, X = O  
**Lsh:** R<sup>1</sup> = Me, R<sup>2</sup> = *t*Bu, X = O

| Entry | Ligand     | Solvent           | Yield/% <sup>a</sup> | <i>Ee</i> /% |
|-------|------------|-------------------|----------------------|--------------|
| 1     | <b>Lsa</b> | Et <sub>2</sub> O | 81                   | 18.6         |
| 2     | <b>Lsb</b> | Et <sub>2</sub> O | 96                   | 32.4         |
| 3     | <b>Lsc</b> | Et <sub>2</sub> O | 92                   | 33.2         |
| 4     | <b>Lsd</b> | Et <sub>2</sub> O | 88                   | 31.0         |
| 5     | <b>Lse</b> | Et <sub>2</sub> O | 98                   | 85.8         |
| 6     | <b>Lsf</b> | Et <sub>2</sub> O | 83                   | 90.6         |
| 7     | <b>Lsg</b> | Et <sub>2</sub> O | 71                   | 89.6         |
| 8     | <b>Lsh</b> | Et <sub>2</sub> O | 95                   | 93.4         |
| 9     | <b>L1</b>  | Et <sub>2</sub> O | 99                   | <5           |
| 10    | <b>L2</b>  | Et <sub>2</sub> O | 19                   | 61.8         |
| 11    | <b>L3</b>  | Et <sub>2</sub> O | /                    | /            |
| 12    | <b>L4</b>  | Et <sub>2</sub> O | 75                   | 22.6         |
| 13    | <b>L5</b>  | Et <sub>2</sub> O | 99                   | 87.8         |
| 14    | <b>L6</b>  | Et <sub>2</sub> O | 54                   | 95.8         |
| 15    | <b>L7</b>  | Et <sub>2</sub> O | 88                   | 98.0         |

|    |           |                   |    |      |
|----|-----------|-------------------|----|------|
| 16 | <b>L8</b> | Et <sub>2</sub> O | 96 | 99.6 |
| 17 | <b>L9</b> | Et <sub>2</sub> O | 83 | 89.6 |
| 18 | <b>L8</b> | MeCN              | 52 | 99.0 |
| 19 | <b>L8</b> | DCM               | 53 | 99.2 |
| 20 | <b>L8</b> | THF               | 84 | 99.6 |
| 21 | <b>L8</b> | toluene           | 85 | 99.6 |
| 22 | <b>L8</b> | dioxane           | 87 | 99.8 |

<sup>a</sup> Yield was determined by <sup>1</sup>H NMR by using TMSPH as internal standard.

### Supplementary Table 2 Control experiments.

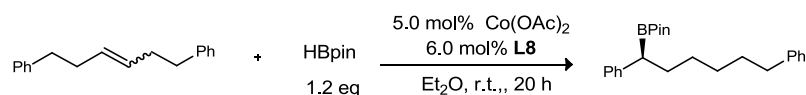

| Entry | Changes from standard conditions                                         | Yield <sup>a</sup> | ee |
|-------|--------------------------------------------------------------------------|--------------------|----|
| 1     | added 1.0 eq. H <sub>2</sub> O                                           | /                  | /  |
| 2     | opened to air                                                            | /                  | /  |
| 3     | no ligand                                                                | /                  | /  |
| 5     | using FeCl <sub>2</sub> instead of Co(OAc) <sub>2</sub>                  | /                  | /  |
| 6     | using Pd(OAc) <sub>2</sub> instead of Co(OAc) <sub>2</sub>               | /                  | /  |
| 7     | using Rh <sub>2</sub> (OAc) <sub>2</sub> instead of Co(OAc) <sub>2</sub> | /                  | /  |

<sup>a</sup> Yield was determined by <sup>1</sup>H NMR by using TMSPH as internal standard.

## Supplementary Methods

### General Information

Ether, tetrahydrofuran, 1,4-dioxane and toluene were distilled from sodium benzophenoneketyl prior to use and dichloromethane was distilled from CaH<sub>2</sub>. Pinacolborane (HBpin) (97%) was purchased from TCI and used as received. NaHBET<sub>3</sub> (1.0 M in THF) were purchased from Aldrich and used as received. Co(OAc)<sub>2</sub> (99%) were purchased from Alfa and used as received. The other commercial available chemicals were used as received. NMR spectra were recorded on a Bruker-400 instrument. <sup>1</sup>H NMR chemical shifts were referenced to tetramethylsilane signal (0



ppm),  $^{13}\text{C}$  NMR chemical shifts were referenced to the solvent resonance (77.00 ppm,  $\text{CDCl}_3$ ). The following abbreviations (or combinations thereof) were used to explain multiplicities: s = singlet, d = doublet, t = triplet, q = quadruplet, m = multiplet, br = broad. IR spectra were recorded on a Perkin-Elmer Spectrum One FTIR spectrometer with diamond ATR accessory. High-resolution mass spectra (HRMS) were recorded on EI-TOF (electrospray ionization-time of flight). X-ray diffraction data was obtained on Gemini A Ultra.

## Procedures for Preparation of Ligands

**L1-L3** were prepared according to the methods reported by our group.<sup>1-3</sup> **S1-S5** were prepared according to the literature.<sup>4</sup>

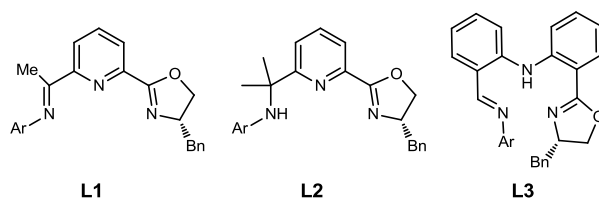

Ar = 2,6-di*i*PrC<sub>6</sub>H<sub>3</sub>

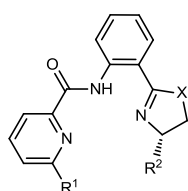

**L4:** R<sup>1</sup> = H, R<sup>2</sup> = Bn, X = O

**L5:** R<sup>1</sup> = Me, R<sup>2</sup> = Bn, X = O

**L6:** R<sup>1</sup> = Me, R<sup>2</sup> = Bn, X = NPh

**L7:** R<sup>1</sup> = Me, R<sup>2</sup> = *i*Pr, X = NPh

**L8:** R<sup>1</sup> = Me, R<sup>2</sup> = *t*Bu, X = NPh

**L9:** R<sup>1</sup> = Me, R<sup>2</sup> = Ph, X = NPh

**Lsa:** R<sup>1</sup> = H, R<sup>2</sup> = Ph, X = O

**Lsb:** R<sup>1</sup> = H, R<sup>2</sup> = indenyl, X = O

**Lsc:** R<sup>1</sup> = H, R<sup>2</sup> = *i*Pr, X = O

**Lsd:** R<sup>1</sup> = H, R<sup>2</sup> = *t*Bu, X = O

**Lse:** R<sup>1</sup> = Me, R<sup>2</sup> = Ph, X = O

**Lsf:** R<sup>1</sup> = Me, R<sup>2</sup> = indenyl, X = O

**Lsg:** R<sup>1</sup> = Me, R<sup>2</sup> = *i*Pr, X = O

**Lsh:** R<sup>1</sup> = Me, R<sup>2</sup> = *t*Bu, X = O

## General procedure for the preparation of L4 –L5, Lsa-Lsh

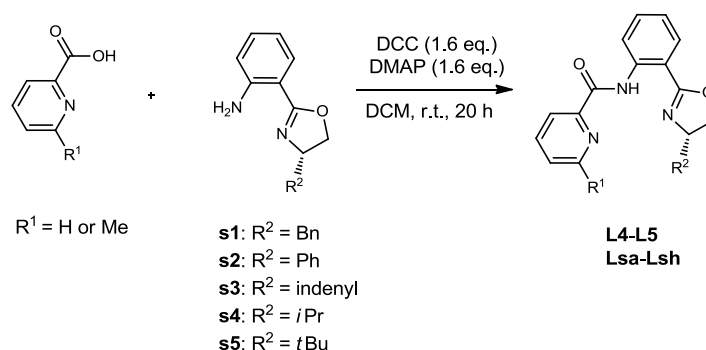

A 50 mL oven-dried round-bottom flask was charged with amine **S1** (5.0 mmol), picolinic acid (8.0 mmol) and DCM (25 mL). After stirred at room temperature for 5 min, DCC (8.0 mmol) and DMAP (8 mmol) was added to this reaction mixture and stirred at room temperature for 24 h.

Then the reaction mixture was concentrated in vacuo and purified by column chromatography using PE/EA = 10/1 as the eluent to give the product **L4**.

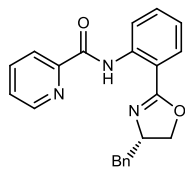

**(S)-N-(2-(4-benzyl-4,5-dihydrooxazol-2-yl)phenyl)picolinamide (L4):**

Prepared according to the general procedure using picolinic acid (0.9618g, 7.8 mmol), **S1** (1.2550 g, 5.0 mmol), DCM (25 mL), DCC (1.6430 g, 8.0 mmol) and DMAP (0.9756 g, 8.0 mmol). After 24 h, the reaction mixture was concentrated in vacuo and purified by column chromatography using PE/EA = 10/1 as the eluent to afford **L4** (1.7209 g, 0.48 mmol, 97% yield) as a white solid. M.P.: 74.6-75.8 °C; IR (neat): 3060, 2925, 1681, 1642, 1581, 1528, 1448 cm<sup>-1</sup>. Optical Rotation:  $[\alpha]_D^{20} = +73.7$  (c 1.0, CHCl<sub>3</sub>). <sup>1</sup>H NMR (400 MHz, CDCl<sub>3</sub>): δ 13.78 (s, 1H), 9.03 (d, *J* = 8.0 Hz, 1H), 8.54 (d, *J* = 4.4 Hz, 1H), 8.29 (d, *J* = 7.6 Hz, 1H), 7.94-7.80 (m, 2H), 7.57-7.49 (m, 1H), 7.42 (dd, *J* = 7.2, 4.8 Hz, 1H), 7.32-7.19 (m, 5H), 7.13 (t, *J* = 7.2 Hz, 1H), 4.89-4.77 (m, 1H), 4.38 (t, *J* = 9.2 Hz, 1H), 4.11 (t, *J* = 8.0 Hz, 1H), 3.35 (dd, *J* = 14.0, 5.2 Hz, 1H), 2.92 (dd, *J* = 14.0, 8.0 Hz, 1H); <sup>13</sup>C NMR: (101 MHz, CDCl<sub>3</sub>): δ 164.1, 163.4, 151.0, 148.3, 139.5, 137.7, 137.2, 132.4, 129.30, 129.28, 128.5, 126.5, 126.0, 122.75, 122.66, 120.2, 114.6, 70.5, 67.9, 41.7. HRMS (ESI) calculated for [M+Na]<sup>+</sup>[C<sub>22</sub>H<sub>19</sub>N<sub>3</sub>O<sub>2</sub>Na]<sup>+</sup> requires *m/z* 380.1375, found *m/z* 380.1377.

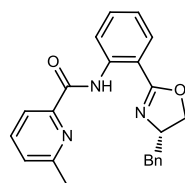

**(S)-N-(2-(4-benzyl-4,5-dihydrooxazol-2-yl)phenyl)-6-methylpicolinamide**

**(L5):** Prepared according to the general procedure using 6-methylpicolinic acid (0.6582 g, 4.8 mmol), **S1** (0.7568 g, 3.0 mmol), DCM (15 mL), DCC (0.9918 g,

4.8 mmol) and DMAP (0.5816 g, 4.8 mmol). After 24 h, the reaction mixture was concentrated in vacuo and purified by column chromatography using PE/EA = 10/1 as the eluent to afford **L5** (0.9895 g, 2.7 mmol, 89% yield) as a white solid. M.P.: 101.8-103.5 °C; IR (neat): 3025, 2895, 1678, 1641, 1582, 1522, 1445 cm<sup>-1</sup>. Optical Rotation:  $[\alpha]_D^{20} = +116.3$  (c 1.09, CHCl<sub>3</sub>). <sup>1</sup>H NMR (400 MHz, CDCl<sub>3</sub>): δ 13.71 (s, 1H), 9.05 (d, *J* = 8.4 Hz, 1H), 8.12 (d, *J* = 7.6 Hz, 1H), 7.87 (d, *J* = 7.6 Hz, 1H), 7.78 (t, *J* = 7.6 Hz, 1H), 7.53 (t, *J* = 7.6 Hz, 1H), 7.31 (d, *J* = 7.6 Hz, 1H), 7.27-7.17 (m, 5H), 7.12 (t, *J* = 7.6 Hz, 1H), 4.87-4.76 (m, 1H), 4.32 (t, *J* = 8.8 Hz, 1H), 4.16 (dd, *J* = 8.0, 7.6 Hz, 1H), 3.38 (dd, *J* = 13.6, 4.4 Hz, 1H), 2.87 (dd, *J* = 13.6, 9.2 Hz, 1H), 2.66 (s, 3H). <sup>13</sup>C NMR (101 MHz, CDCl<sub>3</sub>) δ 164.3, 163.4, 157.1, 150.4, 139.6, 137.5, 137.3, 132.3,

129.3, 129.2, 128.5, 126.5, 125.8, 122.5, 120.1, 119.9, 114.4, 70.3, 68.0, 41.7, 24.3. HRMS (ESI) calculated for  $[M+Na]^+[C_{23}H_{21}N_3O_2Na]^+$  requires  $m/z$  394.1531, found  $m/z$  394.1527.

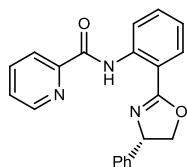

**(S)-N-(2-(4-phenyl-4,5-dihydrooxazol-2-yl)phenyl)picolinamide (Lsa):**

Prepared according to the general procedure using picolinic acid (0.1979 g, 1.6 mmol), **S2** (0.2384 g, 1.0 mmol), DCM (5.0 mL), DCC (0.3329 g, 1.6 mmol) and DMAP (0.1968 g, 1.6 mmol). After 24 h, the reaction mixture was concentrated in vacuo and purified by column chromatography using PE/EA = 10/1 as the eluent to afford **Lsa** (0.3242 g, 0.94 mmol, 94% yield) as a white solid. M.P.: 92.0-93.1 °C; IR (neat): 3059, 2890, 1679, 1640, 1580, 1525, 1446  $cm^{-1}$ ; Optical Rotation:  $[\alpha]_D^{20} = +256.0$  (c 1.02,  $CHCl_3$ );  $^1H$  NMR (400 MHz,  $CDCl_3$ ):  $\delta$ 13.88 (s, 1H), 9.08 (dd,  $J = 8.8, 1.6$  Hz, 1H), 8.26 (d,  $J = 7.2$  Hz, 2H), 7.97 (dd,  $J = 8.0, 1.2$  Hz, 1H), 7.88-7.78 (m, 1H), 7.61-7.50 (m, 3H), 7.42-7.28 (m, 4H), 7.21-7.12 (m, 1H), 5.67 (t,  $J = 9.6$  Hz, 1H), 4.91-4.82 (m, 1H), 4.24 (t,  $J = 9.2$  Hz, 1H);  $^{13}C$  NMR: (101 MHz,  $CDCl_3$ ):  $\delta$ 164.1, 164.0, 150.9, 148.2, 142.0, 139.7, 137.1, 132.6, 129.5, 128.6, 127.4, 126.7, 126.0, 122.7, 122.6, 120.2, 114.5, 73.1, 70.2; HRMS (ESI) calculated for  $[M+Na]^+[C_{21}H_{17}N_3O_2Na]^+$  requires  $m/z$  366.1218, found  $m/z$  366.1220.

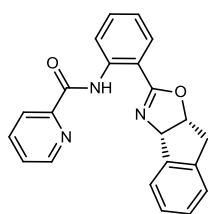

**N-(2-((3aS,8aR)-8,8a-dihydro-3aH-indeno[1,2-d]oxazol-2-yl)phenyl)picolinamide (Lsb):**

Prepared according to the general procedure using picolinic acid (0.7580 g, 6.1 mmol), **S3** (1.2248 g, 4.9 mmol), DCM (25 mL), EDCI (1.1618 g, 6.0 mmol) and DMAP (0.7428 g, 6.0 mmol). After 24 h, the reaction mixture was concentrated in vacuo and purified by column chromatography using PE/EA = 10/1 as the eluent to afford **Lsb** (0.8450 g, 2.4 mmol, 49% yield) as a white solid. M.P.: 194.6-196.9 °C; Optical Rotation:  $[\alpha]_D^{20} = +280.0$  (c 0.52,  $CHCl_3$ ) (lit.<sup>5</sup>:  $[\alpha]_D^{27} = -74$  (c 0.5,  $CH_2Cl_2$ ));  $^1H$  NMR (400 MHz,  $CDCl_3$ ):  $\delta$ 13.73 (s, 1H), 8.99 (d,  $J = 8.4$  Hz, 1H), 8.88 (d,  $J = 4.0$  Hz, 1H), 8.29 (d,  $J = 8.0$  Hz, 1H), 7.97-7.86 (m, 2H), 7.70-7.62 (m, 1H), 7.57-7.46 (m, 2H), 7.31-7.21 (m, 3H), 7.15-7.04 (m, 1H), 5.94 (d,  $J = 8.0$  Hz, 1H), 5.52-5.42 (m, 1H), 3.54 (dd,  $J = 18.0, 6.8$  Hz, 1H), 3.40 (d,  $J = 18.0$  Hz, 1H);  $^{13}C$  NMR: (101 MHz,  $CDCl_3$ ):  $\delta$ 164.0, 163.4, 151.2, 148.2, 141.9, 139.6, 139.5, 137.2, 132.3, 129.4, 128.6, 127.3, 126.1, 125.5, 125.3, 122.9, 122.6, 120.2, 114.6, 81.8, 77.1, 39.7; HRMS (ESI) calculated for  $[M+H]^+[C_{22}H_{18}N_3O_2]^+$  requires  $m/z$  325.1

356.1399, found  $m/z$  356.1408.

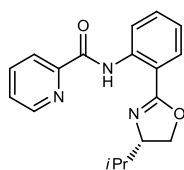

**(S)-N-(2-(4-isopropyl-4,5-dihydrooxazol-2-yl)phenyl)picolinamide (Lsc):**

Prepared according to the general procedure using picolinic acid (0.1995 g, 1.6 mmol), **S4** (0.2065 g, 1.0 mmol), DCM (5.0 mL), DCC (0.3329 g, 1.6 mmol) and DMAP (0.1963 g, 1.6 mmol). After 24 h, the reaction mixture was concentrated in vacuo and purified by column chromatography using PE/EA = 10/1 as the eluent to afford **Lsc** (0.2674 g, 0.086 mmol, 86% yield) as a white solid. M.P.: 92.9-94.4 °C; IR (neat): 3062, 2958, 1680, 1643, 1581, 1524, 1447  $\text{cm}^{-1}$ ; Optical Rotation:  $[\alpha]_{\text{D}}^{20} = +27.0$  (c 1.01,  $\text{CHCl}_3$ );  $^1\text{H}$  NMR (400 MHz,  $\text{CDCl}_3$ ):  $\delta$  13.74 (s, 1H), 9.06 (d,  $J = 8.4$  Hz, 1H), 8.69-8.60 (m, 1H), 8.34-8.27 (m, 1H), 7.95-7.84 (m, 2H), 7.56-7.49 (m, 1H), 7.45 (ddd,  $J = 5.6, 4.4, 1.2$  Hz, 1H), 7.17-7.09 (m, 1H), 4.47-4.39 (m, 1H), 4.31-4.20 (m, 1H), 4.11-4.02 (m, 1H), 1.91-1.80 (m, 1H), 1.20 (d,  $J = 6.4$  Hz, 3H), 1.07 (d,  $J = 6.8$  Hz, 3H);  $^{13}\text{C}$  NMR: (101 MHz,  $\text{CDCl}_3$ ):  $\delta$  164.1, 162.9, 151.1, 148.2, 139.6, 137.2, 132.2, 129.4, 126.1, 122.9, 122.7, 120.3, 114.7, 73.5, 69.5, 33.5, 19.2, 18.7; HRMS (ESI) calculated for  $[\text{M}+\text{Na}]^+[\text{C}_{18}\text{H}_{19}\text{N}_3\text{O}_2\text{Na}]^+$  requires  $m/z$  332.1375, found  $m/z$  332.1376.

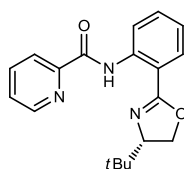

**(S)-N-(2-(4-(tert-butyl)-4,5-dihydrooxazol-2-yl)phenyl)picolinamide (Lsd):**

Prepared according to the general procedure using picolinic acid (0.1995 g, 1.6 mmol), **S5** (0.2184 g, 1.0 mmol), DCM (5.0 mL), DCC (0.3334 g, 1.6 mmol) and DMAP (0.1951 g, 1.6 mmol). After 24 h, the reaction mixture was concentrated in vacuo and purified by column chromatography using PE/EA = 10/1 as the eluent to afford **Lsd** (0.2861 g, 0.88 mmol, 88% yield) as a white solid. M.P.: 100.7-102.1 °C; IR (neat): 3061, 2953, 1680, 1644, 1582, 1524, 1447  $\text{cm}^{-1}$ ; Optical Rotation:  $[\alpha]_{\text{D}}^{20} = +38.1$  (c 1.0,  $\text{CHCl}_3$ );  $^1\text{H}$  NMR (400 MHz,  $\text{CDCl}_3$ ):  $\delta$  13.70 (s, 1H), 9.07 (d,  $J = 8.4$  Hz, 1H), 8.66-8.59 (m, 1H), 8.31 (d,  $J = 8.0$  Hz, 1H), 7.96-7.83 (m, 2H), 7.56-7.49 (m, 1H), 7.48-7.40 (m, 1H), 7.18-7.09 (m, 1H), 4.38-4.24 (m, 2H), 4.18 (t,  $J = 7.6$  Hz, 1H), 1.07 (s, 9H);  $^{13}\text{C}$  NMR: (101 MHz,  $\text{CDCl}_3$ ):  $\delta$  164.2, 162.8, 151.1, 148.2, 139.6, 137.2, 132.2, 129.4, 126.1, 122.9, 122.7, 120.3, 114.6, 76.8, 67.3, 33.9, 25.9; HRMS (ESI) calculated for  $[\text{M}+\text{Na}]^+[\text{C}_{19}\text{H}_{21}\text{N}_3\text{O}_2\text{Na}]^+$  requires  $m/z$  346.1531, found  $m/z$  346.1529.

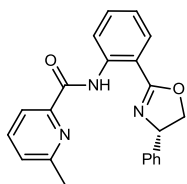

**(S)-6-methyl-N-(2-(4-phenyl-4,5-dihydrooxazol-2-yl)phenyl)picolinamide**

**(Lse):** Prepared according to the general procedure using 6-methylpicolinic acid (1.0980 g, 8.0 mmol), **S2** (0.7658 g, 3.2 mmol), DCM (20 mL), DCC (1.6528 g, 8.0 mmol) and DMAP (0.9780 g, 8.0 mmol). After 24 h, the reaction

mixture was concentrated in vacuo and purified by column chromatography using PE/EA = 10/1 as the eluent to afford **Lse** (1.0836 g, 3.0 mmol, 94% yield) as a white solid. M.P.: 92.1-93.4 °C. IR (neat): 3063, 3026, 1680, 1640, 1583, 1524, 1446  $\text{cm}^{-1}$ . Optical Rotation:  $[\alpha]_{\text{D}}^{20} = +239.7$  (c 1.0,  $\text{CHCl}_3$ ).  $^1\text{H}$  NMR (400 MHz,  $\text{CDCl}_3$ )  $\delta$  13.86 (s, 1H), 9.20-8.90 (m, 1H), 8.05 (d,  $J = 7.6$  Hz, 1H), 7.99 (dd,  $J = 8.0, 1.6$  Hz, 1H), 7.69 (t,  $J = 7.6$  Hz, 1H), 7.60-7.52 (m, 1H), 7.41-7.26 (m, 5H), 7.20-7.13 (m, 2H), 5.76-5.49 (m, 1H), 4.81 (dd,  $J = 10.0, 8.4$  Hz, 1H), 4.19 (t,  $J = 8.4$  Hz, 1H), 2.04 (s, 3H);  $^{13}\text{C}$  NMR (101 MHz,  $\text{CDCl}_3$ )  $\delta$  164.38, 164.35, 157.4, 150.1, 142.2, 139.9, 137.2, 132.6, 129.5, 128.6, 127.6, 126.8, 125.7, 122.5, 120.2, 119.6, 114.3, 73.7, 70.4, 23.3; HRMS (ESI) calculated for  $[\text{M}+\text{Na}]^+[\text{C}_{22}\text{H}_{19}\text{N}_3\text{O}_2\text{Na}]^+$  requires  $m/z$  380.1375, found  $m/z$  380.1367.

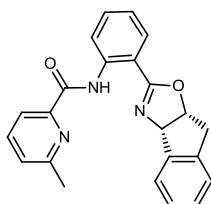

**N-(2-((3a*S*,8a*R*)-8,8a-dihydro-3aH-indeno[1,2-d]oxazol-2-yl)phenyl)-6-methylpicolinamide (Lsf):** Prepared according to the general procedure using 6-methylpicolinic acid (0.1808 g, 1.3 mmol), **S3** (0.2506 g, 1.0 mmol), DCM (5.0 mL), DCC (0.2728 g, 1.3 mmol) and DMAP (0.1640 g, 1.3 mmol).

After 24 h, the reaction mixture was concentrated in vacuo and purified by column chromatography using PE/EA = 10/1 as the eluent to afford **Lsf** (0.1760 g, 0.48 mmol, 48% yield) as a white solid. M.P.: 201.6-203.1 °C. IR (neat): 3023, 2923, 1682, 1638, 1583, 1529, 1447  $\text{cm}^{-1}$ . Optical Rotation:  $[\alpha]_{\text{D}}^{20} = +437.6$  (c 0.92,  $\text{CHCl}_3$ ).  $^1\text{H}$  NMR (400 MHz,  $\text{CDCl}_3$ )  $\delta$  13.71 (s, 1H), 8.97 (d,  $J = 8.4$  Hz, 1H), 8.11 (d,  $J = 7.6$  Hz, 1H), 7.89 (dd,  $J = 7.6, 1.2$  Hz, 1H), 7.80 (t,  $J = 7.6$  Hz, 1H), 7.54 (d,  $J = 7.2$  Hz, 1H), 7.50-7.45 (m, 1H), 7.38 (d,  $J = 8.0$  Hz, 1H), 7.29-7.18 (m, 3H), 7.12-7.02 (m, 1H), 5.96 (d,  $J = 7.6$  Hz, 1H), 5.50-5.41 (m, 1H), 3.58-3.40 (m, 2H), 2.87 (s, 3H);  $^{13}\text{C}$  NMR (101 MHz,  $\text{CDCl}_3$ )  $\delta$  164.3, 163.6, 157.0, 150.6, 141.9, 139.62, 139.57, 137.4, 132.3, 129.4, 128.6, 127.4, 125.9, 125.4, 122.5, 120.4, 120.1, 114.7, 82.2, 39.4, 24.7; HRMS (ESI) calculated for  $[\text{M}+\text{Na}]^+[\text{C}_{23}\text{H}_{19}\text{N}_3\text{O}_2\text{Na}]^+$  requires  $m/z$  392.1375, found  $m/z$  392.1376.

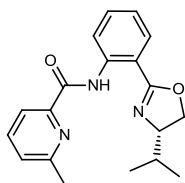

**(S)-N-(2-(4-isopropyl-4,5-dihydrooxazol-2-yl)phenyl)-6-methylpicolinamide (Lsg):**

Prepared according to the general procedure using 6-methylpicolinic acid (0.6588 g, 4.8 mmol), **S4** (0.6168 g, 3.0 mmol), DCM (15 mL), DCC (0.9908 g, 4.8 mmol) and DMAP (0.5909 g, 4.8 mmol). After 24 h, the reaction mixture was concentrated in vacuo and purified by column chromatography using PE/EA = 10/1 as the eluent to afford **Lsg** (0.9244 g, 2.9 mmol, 95% yield) as a white solid. M.P.: 81.3-82.6 °C; IR (neat): 3091, 2960, 1679, 1642, 1582, 1520, 1444 cm<sup>-1</sup>; Optical Rotation:  $[\alpha]_D^{20} = +146.0$  (c 1.03, CHCl<sub>3</sub>); <sup>1</sup>H NMR (400 MHz, CDCl<sub>3</sub>) δ 13.44 (s, 1H), 8.97 (d, *J* = 8.4 Hz, 1H), 8.10 (d, *J* = 7.6 Hz, 1H), 7.90 (d, *J* = 7.6 Hz, 1H), 7.76 (t, *J* = 7.6 Hz, 1H), 7.51 (t, *J* = 8.0 Hz, 1H), 7.31 (d, *J* = 7.6 Hz, 1H), 7.12 (t, *J* = 7.6 Hz, 1H), 4.42-4.28 (m, 2H), 4.20-4.12 (m, 1H), 2.66 (s, 3H), 2.05-1.90 (m, 1H), 1.02 (d, *J* = 6.8 Hz, 3H), 0.94 (d, *J* = 6.8 Hz, 3H); <sup>13</sup>C NMR (101 MHz, CDCl<sub>3</sub>) δ 164.4, 162.7, 157.2, 150.5, 139.4, 137.2, 132.0, 129.3, 125.8, 122.5, 120.4, 120.0, 114.8, 72.7, 68.4, 32.7, 24.4, 18.9, 17.8; HRMS (ESI) calculated for [M+Na]<sup>+</sup>[C<sub>19</sub>H<sub>21</sub>N<sub>3</sub>O<sub>2</sub>Na]<sup>+</sup> requires *m/z* 346.1531, found *m/z* 346.1532.

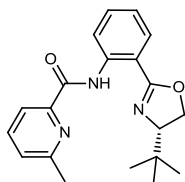

**(S)-N-(2-(4-(tert-butyl)-4,5-dihydrooxazol-2-yl)phenyl)-6-methylpicolinamide (Lsh):**

Prepared according to the general procedure using 6-methylpicolinic acid (0.1287 g, 0.94 mmol), **S5** (0.1317 g, 0.6 mmol), DCM (5 mL), DCC (0.1989 g, 0.96 mmol) and DMAP (0.1145 g, 0.94 mmol). After 24 h, the reaction mixture was concentrated in vacuo and purified by column chromatography using PE/EA = 10/1 as the eluent to afford **Lsh** (0.1272 g, 0.38 mmol, 63% yield) as a white solid. M.P.: 67.2-68.4 °C. IR (neat): 3097, 2957, 1680, 1643, 1584, 1522, 1445 cm<sup>-1</sup>. Optical Rotation:  $[\alpha]_D^{20} = +200.0$  (c 1.02, CHCl<sub>3</sub>). <sup>1</sup>H NMR (400 MHz, CDCl<sub>3</sub>) δ 13.23 (s, 1H), 8.92 (dd, *J* = 8.4, 0.4 Hz, 1H), 8.10 (d, *J* = 7.6 Hz, 1H), 7.90 (dd, *J* = 8.0, 1.6 Hz, 1H), 7.75 (t, *J* = 7.6 Hz, 1H), 7.55-7.48 (m, 1H), 7.30 (d, *J* = 7.6 Hz, 1H), 7.16-7.09 (m, 1H), 4.35-4.20 (m, 3H), 2.65 (s, 3H), 0.94 (s, 9H); <sup>13</sup>C NMR (101 MHz, CDCl<sub>3</sub>) δ 164.6, 162.7, 157.4, 150.8, 139.5, 137.3, 132.0, 129.3, 125.9, 122.7, 120.8, 120.3, 115.0, 76.6, 67.3, 34.2, 25.9, 24.6. HRMS (ESI) calculated for [M+Na]<sup>+</sup>[C<sub>20</sub>H<sub>23</sub>N<sub>3</sub>O<sub>2</sub>Na]<sup>+</sup> requires *m/z* 360.1688, found *m/z* 360.1685.

## Synthesis of L6-L9:

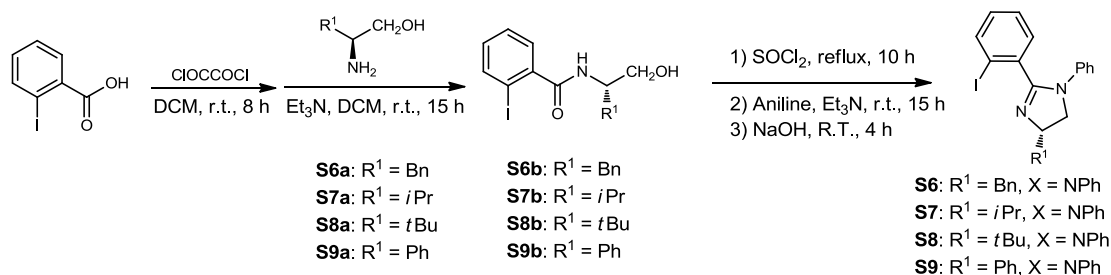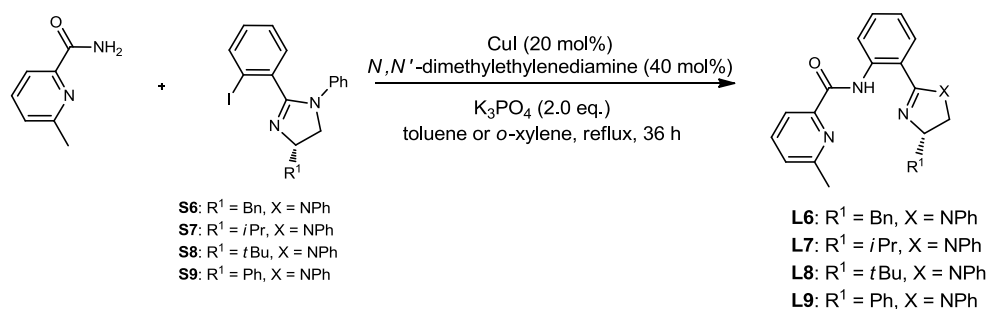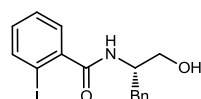

### (*S*)-*N*-(1-hydroxy-3-phenylpropan-2-yl)-2-iodobenzamide (**S6b**):

2-Iodobenzoic acid (24.80 g, 100 mmol) was dissolved in dichloromethane (200 mL) in a 250 mL roundbottomed flask and cooled on an ice bath. Oxalyl chloride (13.0 mL, 150 mmol) and DMF (5 drops) was added in sequence under stirring, and the reaction was allowed to come to room temperature. After 8 hours the reaction mixture was evaporated to give the crude product without purification and used in the next step. The acyl chloride was dissolved in dichloromethane (30 mL) and added dropwise to a solution of the amino alcohol **S6a** (15.12 g, 100 mmol) in triethylamine (35.0 mL, 0.73 g/mL, 250 mmol) and dichloromethane (200 mL) at 0 °C. Then the mixture was warmed to room temperature and stirred for 12 h. After completion of the reaction, the reaction mixture was then washed successively with a saturated aqueous solution of ammonium chloride, HCl (1 M), saturated aqueous solution of sodium hydrogen carbonate and brine. The resulting organic layer was then dried with anhydrous sodium sulfate and concentrated in vacuo to yield crude product as a pale yellow solid and washed with 120 mL of PE/EtOAc (5/1) to afford **S6b** (23.74 g, 62 mmol, 62% yield) as a white solid. M.P.: 133.7-135.3 °C. IR (neat): 3278, 1638, 1535, 1037 cm<sup>-1</sup>. Optical Rotation: [α]<sub>D</sub><sup>20</sup> = -21.6 (c 0.99, CH<sub>2</sub>Cl<sub>2</sub>). <sup>1</sup>H NMR (400 MHz, CD<sub>3</sub>OD) δ 7.84 (d, *J* = 8.0 Hz, 1H), 7.40-7.27 (m, 5H), 7.24-7.19 (m, 1H), 7.15-7.04 (m, 2H), 4.35-4.29 (m, 1H), 3.69 (dd, *J* = 11.2, 5.6 Hz, 1H), 3.63 (dd, *J* = 11.2, 5.6 Hz, 1H), 3.06 (dd,

$J = 13.6, 5.6$  Hz, 1H), 2.83 (dd,  $J = 14.0, 8.8$  Hz, 1H);  $^{13}\text{C}$  NMR (101 MHz,  $\text{CD}_3\text{OD}$ )  $\delta$ 172.2, 144.2, 140.6, 139.9, 131.8, 130.4, 129.4, 129.0, 128.9, 127.4, 93.2, 64.2, 54.6, 37.9. HRMS (ESI) calculated for  $[\text{M}+\text{H}]^+[\text{C}_{16}\text{H}_{17}\text{INO}_2]^+$  requires  $m/z$  382.0304, found  $m/z$  382.0308.

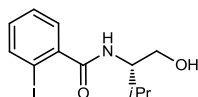

**(S)-N-(1-hydroxy-3-methylbutan-2-yl)-2-iodobenzamide (S7b):**

2-Iodobenzoic acid (19.89 g, 80 mmol) was dissolved in dichloromethane (200 mL) in a 250 mL round bottomed flask and cooled on an ice bath. Oxalyl chloride (10.0 mL, 120 mmol) and DMF (10 drops) was added in sequence under stirring, and the reaction was allowed to come to room temperature. After 8 hours the reaction mixture was evaporated to give the crude product without purification and used in the next step. The acyl chloride was dissolved in dichloromethane (20 mL) and added dropwise to a solution of the amino alcohol **S7a** (8.2890 g, 80 mmol) in triethylamine (28 mL, 0.73 g/mL, 200 mmol) and dichloromethane (200 mL) at 0 °C. Then the mixture was warmed to room temperature and stirred for 12 h. After completion of the reaction, the reaction mixture was then washed successively with a saturated aqueous solution of ammonium chloride, HCl (1 M), saturated aqueous solution of sodium hydrogen carbonate and brine. The resulting organic layer was then dried with anhydrous sodium sulfate and concentrated in vacuo to yield crude product as a pale yellow solid and washed with 110 mL of PE/EtOAc (10/1) to afford **S7b** (24.31 g, 73 mmol, 91% yield) as a white solid. M.P.: 112.9-114.2 °C. IR (neat): 3272, 2960, 1637, 1537, 1017  $\text{cm}^{-1}$ . Optical Rotation:  $[\alpha]_{\text{D}}^{20} = -28.3$  (c 0.98,  $\text{CH}_2\text{Cl}_2$ ).  $^1\text{H}$  NMR (400 MHz,  $\text{CD}_3\text{OD}$ )  $\delta$ 7.89 (d,  $J = 8.0$  Hz, 1H), 7.47-7.37 (m, 2H), 7.15 (td,  $J = 7.6, 1.6$  Hz, 1H), 3.91 (q,  $J = 6.0$  Hz, 1H), 3.76-3.64 (m, 2H), 2.09-1.97 (m, 1H), 1.07 (d,  $J = 6.8$  Hz, 3H), 1.04 (d,  $J = 6.8$  Hz, 3H);  $^{13}\text{C}$  NMR (101 MHz,  $\text{CD}_3\text{OD}$ )  $\delta$ 172.6, 144.5, 140.6, 131.8, 129.08, 129.05, 93.2, 62.9, 58.4, 29.9, 20.2, 19.0. HRMS (ESI) calculated for  $[\text{M}+\text{H}]^+[\text{C}_{12}\text{H}_{17}\text{INO}_2]^+$  requires  $m/z$  334.0304, found  $m/z$  334.0306.

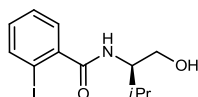

**(R)-N-(1-hydroxy-3-methylbutan-2-yl)-2-iodobenzamide (ent-S7b):**

2-Iodobenzoic acid (12.44 g, 50 mmol) was dissolved in dichloromethane (60 mL) in a 250 mL round-bottomed flask and cooled on an ice bath. Oxalyl chloride (6.3 mL, 75 mmol) and DMF (8 drops) was added in sequence under stirring, and the reaction was allowed to come to room temperature. After 7 hours the reaction mixture was evaporated to give the crude



product without purification and used in the next step. The acyl chloride was dissolved in dry dichloromethane (30 mL) and added dropwise to a solution of the amino alcohol (*R*)-2-amino-3-methylbutan-1-ol (5.18 g, 50 mmol) in triethylamine (17 mL, 0.73 g/mL, 125 mmol) and dichloromethane (30 mL) at 0 °C. Then the mixture was warmed to room temperature and stirred for 12 h. After completion of the reaction, the reaction mixture was then washed successively with a saturated aqueous solution of ammonium chloride, HCl (1 M), saturated aqueous solution of sodium hydrogen carbonate and brine. The resulting organic layer was then dried with anhydrous sodium sulfate and concentrated in vacuo to yield crude product as a pale yellow solid and washed with 100 mL of PE/EtOAc (10/1) to afford **ent-S7b** (15.30 g, 46mmol, 92% yield) as a white solid. M.P.: 111.7-113.1°C. IR (neat): 3271, 2958, 1638, 1536, 1015 cm<sup>-1</sup>. Optical Rotation:  $[\alpha]_D^{20} = +30.6$  (c 1.02, CHCl<sub>3</sub>). <sup>1</sup>H NMR (400 MHz, CDCl<sub>3</sub>) δ7.82 (d, *J* = 8.0 Hz, 1H), 7.41-7.29 (m, 2H), 7.12-7.03 (m, 1H), 6.21 (d, *J* = 7.6 Hz, 1H), 3.94-3.84 (m, 1H), 3.83-3.69 (m, 2H), 2.93 (brs, 1H), 2.02-1.93 (m, 1H), 1.02 (d, *J* = 6.8 Hz, 6H); <sup>13</sup>C NMR (101 MHz, CD<sub>2</sub>Cl<sub>2</sub>) δ169.4, 142.3, 139.3, 130.5, 127.7, 127.5, 91.8, 62.7, 57.1, 28.6, 18.9, 18.4; HRMS (ESI) calculated for [M+H]<sup>+</sup>[C<sub>12</sub>H<sub>17</sub>INO<sub>2</sub>]<sup>+</sup> requires 334.0304 m/z, found m/z 334.0320.

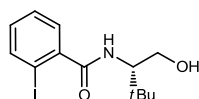

**(S)-N-(1-hydroxy-3,3-dimethylbutan-2-yl)-2-iodobenzamide (S8b):**

2-Iodobenzoic acid (19.80 g, 80 mmol) was dissolved in dichloromethane (200 mL) in a 250 mL roundbottomed flask and cooled on an ice bath. Oxalyl chloride (10.0 mL, 120 mmol) and DMF (10 drops) was added in sequence under stirring, and the reaction was allowed to come to room temperature. After 8 hours the reaction mixture was evaporated to give the crude product without purification and used in the next step. The acyl chloride was dissolved in dichloromethane (20 mL) and added dropwise to a solution of the amino alcohol **S8a** (9.3820 g, 80 mmol) in triethylamine (28 mL, 0.73 g/mL, 200 mmol) and dichloromethane (200 mL) at 0 °C. Then the mixture was warmed to room temperature and stirred for 12 h. After completion of the reaction, the reaction mixture was then washed successively with a saturated aqueous solution of ammonium chloride, HCl (1 M), saturated aqueous solution of sodium hydrogen carbonate and brine. The resulting organic layer was then dried with anhydrous sodium sulfate and concentrated in vacuo to yield crude product as a pale yellow solid and recrystallized from PE/EtOAc to afford **S8b** (23.0441 g, 66 mmol, 83% yield) as a white solid. M.P.: 126.4-128.1°C. IR (neat): 3284, 2959,

1639, 1535, 1017  $\text{cm}^{-1}$ . Optical Rotation:  $[\alpha]_{\text{D}}^{20} = -13.9$  (c 1.02,  $\text{CH}_2\text{Cl}_2$ ).  $^1\text{H}$  NMR (400 MHz,  $\text{CD}_3\text{OD}$ )  $\delta$  7.90 (d,  $J = 8.0$  Hz, 1H), 7.47-7.40 (m, 2H), 7.19-7.11 (m, 1H), 3.97 (dd,  $J = 8.8, 4.0$  Hz, 1H), 3.88 (dd,  $J = 11.6, 4.0$  Hz, 1H), 3.57 (dd,  $J = 11.6, 8.8$  Hz, 1H), 1.05 (s, 9H);  $^{13}\text{C}$  NMR (101 MHz,  $\text{CD}_3\text{OD}$ )  $\delta$  173.0, 144.7, 140.7, 131.8, 129.4, 129.1, 93.1, 62.4, 61.5, 35.1, 27.7. HRMS (ESI) calculated for  $[\text{M}+\text{H}]^+[\text{C}_{13}\text{H}_{19}\text{INO}_2]^+$  requires  $m/z$  348.0460, found  $m/z$  348.0463.

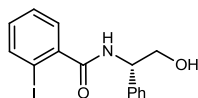

**(S)-N-(2-hydroxy-1-phenylethyl)-2-iodobenzamide (S9b):** 2-Iodobenzoic

acid (19.81 g, 80 mmol) was dissolved in dichloromethane (150 mL) in a 250 mL round bottomed flask and cooled on an ice bath. Oxalyl chloride (10.0 mL, 120 mmol) and DMF (6 drops) was added in sequence under stirring, and the reaction was allowed to come to room temperature. After 8 hours the reaction mixture was evaporated to give the crude product without purification and used in the next step. The acyl chloride was dissolved in dichloromethane (30 mL) and added dropwise to a solution of the amino alcohol **S9a** (10.94 g, 80 mmol) in triethylamine (28 mL, 0.73 g/mL, 200 mmol) and dichloromethane (75 mL) at 0  $^{\circ}\text{C}$ . Then the mixture was warmed to room temperature and stirred for 18 h. After completion of the reaction, the reaction mixture was then washed successively with a saturated aqueous solution of ammonium chloride, HCl (1 M), saturated aqueous solution of sodium hydrogen carbonate and brine. The resulting organic layer was then dried with anhydrous sodium sulfate and concentrated in vacuo to yield crude product as a pale yellow solid and washed with 105 mL of PE/DCM (85/20) to afford **S9b** (14.6019 g, 40 mmol, 50% yield) as a white solid. M.P.: 152.1-153.3 $^{\circ}\text{C}$ . IR (neat): 3285, 1641, 1535, 1022  $\text{cm}^{-1}$ . Optical Rotation:  $[\alpha]_{\text{D}}^{20} = +23.8$  (c 1.03,  $\text{CH}_2\text{Cl}_2$ ).  $^1\text{H}$  NMR (400 MHz,  $\text{CD}_3\text{OD}$ )  $\delta$  7.89 (d,  $J = 7.2$  Hz, 1H), 7.48-7.32 (m, 6H), 7.31-7.25 (m, 1H), 7.18-7.13 (m, 1H), 5.16 (t,  $J = 6.8$  Hz, 1H), 3.84 (d,  $J = 6.8$  Hz, 2H);  $^{13}\text{C}$  NMR (101 MHz,  $\text{CD}_3\text{OD}$ )  $\delta$  172.3, 144.2, 140.8, 140.8, 132.0, 129.5, 129.2, 129.1, 128.5, 128.4, 93.2, 66.0, 57.6. HRMS (ESI) calculated for  $[\text{M}+\text{H}]^+[\text{C}_{15}\text{H}_{15}\text{INO}_2]^+$  requires  $m/z$  368.0147, found  $m/z$  368.0150.

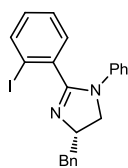

**(S)-4-benzyl-2-(2-iodophenyl)-1-phenyl-4,5-dihydro-1H-imidazole (S6):**

Prepared according to a previously reported procedure with a slight modification,<sup>6</sup> a 50 mL flame-dried Schlenk flask was washed with nitrogen three times and charged with amide **S6b** (7.60 g, 20 mmol), toluene (15 mL) and  $\text{SOCl}_2$  (5.0 mL, 1.60 g/mL, 67 mmol).

Then the mixture was refluxed for 12 h. After cooling to room temperature, the mixture was concentrated and the residue was dissolved in 150 mL Et<sub>2</sub>O and transferred to a 250 mL flame-dried round bottomed flask. To this reaction mixture, triethylamine (31 mL, 0.73 g/mL, 224 mmol) and aniline (2.1 mL, 1.02 g/mL, 23 mmol) were added in sequence. After stirred at room temperature for 48 h, 10% NaOH (200 mL) was added and stirred for another 5 h. The organic layer was separated and the aqueous layer extracted with EtOAc (4 × 20 mL). The combined organic phases were dried over anhydrous Na<sub>2</sub>SO<sub>4</sub> and concentrated in vacuo and purified by flash column chromatography using PE/EtOAc (50/1 to 5/1) as the eluent to afford **S6** (4.7986 g, 11 mmol, 55% yield) as a yellow oil. IR (neat): 3058, 2972, 1601, 1576, 1498, 1476, 1384 cm<sup>-1</sup>; Optical Rotation:  $[\alpha]_D^{20} = -9.8$  (c 1.10, CHCl<sub>3</sub>); <sup>1</sup>H NMR (400 MHz, CDCl<sub>3</sub>): δ 7.77 (d, *J* = 8.0 Hz, 1H), 7.42-7.28 (m, 6H), 7.25-7.20 (m, 1H), 7.10-7.02 (m, 3H), 6.88 (t, *J* = 7.6 Hz, 1H), 6.58 (d, *J* = 8.0 Hz, 2H), 4.6-4.52 (m, 1H), 4.03-3.96 (m, 1H), 3.77 (dd, *J* = 8.8, 7.6 Hz, 1H), 3.34 (dd, *J* = 13.6, 4.8 Hz, 1H), 2.88 (dd, *J* = 13.6, 8.8 Hz, 1H); <sup>13</sup>C NMR (101 MHz, CDCl<sub>3</sub>): δ 161.7, 140.5, 139.4, 138.4, 137.5, 130.7, 130.3, 129.4, 128.6, 128.4, 128.1, 126.3, 122.5, 119.5, 96.4, 65.3, 55.7, 41.9. HRMS (ESI) calculated for [M+Na]<sup>+</sup>[C<sub>22</sub>H<sub>19</sub>IN<sub>2</sub>Na]<sup>+</sup> requires *m/z* 461.0491, found *m/z* 461.0485.

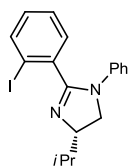

**(S)-2-(2-iodophenyl)-4-isopropyl-1-phenyl-4,5-dihydro-1H-imidazole (S7):**

Prepared according to a previously reported procedure with a slight modification,<sup>6</sup> a 100 mL flame-dried Schlenk flask was washed with nitrogen three times and charged with amide **S7b** (8.3322 g, 25 mmol), toluene (10 mL) and SOCl<sub>2</sub> (10.0 mL, 1.60 g/mL, 134 mmol). Then the mixture was refluxed for 12 h. After cooling to room temperature, the mixture was concentrated and the residue was dissolved in 30 mL DCM and transferred to a 250 mL flame-dried round bottomed flask. To this reaction mixture, triethylamine (28 mL, 0.73 g/mL, 200 mmol) and aniline (2.5 mL, 1.02 g/mL, 27.5 mmol) were added in sequence. After stirred at room temperature for 30 h, 10% NaOH (200 mL) was added and stirred for another 5 h. The organic layer was separated and the aqueous layer extracted with DCM (3 × 200 mL). The combined organic phases were dried over anhydrous Na<sub>2</sub>SO<sub>4</sub> and concentrated in vacuo and purified by flash column chromatography using PE/EtOAc (50/1 to 5/1) as the eluent to afford **S7** (9.4098 g, 24 mmol, 96% yield) as a yellow oil. IR (neat): 3057, 2956, 1599, 1579, 1498, 1475,

1382  $\text{cm}^{-1}$ ; Optical Rotation:  $[\alpha]_{\text{D}}^{20} = -71.9$  (c 1.20,  $\text{CHCl}_3$ );  $^1\text{H}$  NMR (400 MHz,  $\text{CDCl}_3$ ):  $\delta$ 7.76 (dd,  $J = 8.0, 0.8$  Hz, 1H), 7.43 (dd,  $J = 7.6, 1.6$  Hz, 1H), 7.36 (td,  $J = 7.6, 0.8$  Hz, 1H), 7.12-7.02 (m, 3H), 6.92-6.86 (m, 1H), 6.64 (dd,  $J = 8.4, 0.8$  Hz, 2H), 4.14-3.96 (m, 2H), 3.78 (t,  $J = 8.0$  Hz, 1H), 2.07-1.94 (m, 1H), 1.12 (d,  $J = 6.8$  Hz, 3H), 1.05 (d,  $J = 6.8$  Hz, 3H);  $^{13}\text{C}$  NMR (101 MHz,  $\text{CDCl}_3$ ):  $\delta$ 161.0, 140.7, 139.3, 137.9, 130.5, 130.3, 128.5, 128.1, 122.1, 119.2, 96.3, 70.1, 53.7, 32.9, 19.1, 18.4. HRMS (ESI) calculated for  $[\text{M}+\text{Na}]^+[\text{C}_{18}\text{H}_{19}\text{IN}_2\text{Na}]^+$  requires  $m/z$  413.0491, found  $m/z$  413.0490.

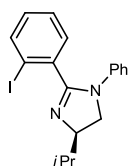

**(R)-2-(2-iodophenyl)-4-isopropyl-1-phenyl-4,5-dihydro-1H-imidazole (ent-S7):**

Prepared according to a previously reported procedure with a slight modification,<sup>6</sup> a 50 mL flame-dried Schlenk flask was washed with nitrogen three times and charged with amide **ent-S7b** (6.6600 g, 20mmol),  $\text{SOCl}_2$  (4.4 mL, 1.60 g/mL, 60 mmol). Then the mixture was refluxed for 12 h. After cooling to room temperature, the mixture was concentrated and the residue was dissolved in 20 mL DCM and transferred to a 250 mL flame-dried round-bottomed flask. To this reaction mixture, triethylamine (28 mL, 0.73 g/mL, 200 mmol) and aniline (2.0 mL, 1.02 g/mL, 22mmol) were added in sequence. After stirred at room temperature for 12 h, 10% NaOH (200 mL) was added and stirred for another 4 h. The organic layer was separated and the aqueous layer extracted with DCM ( $3 \times 200$  mL). The combined organic phases were dried over anhydrous  $\text{Na}_2\text{SO}_4$  and concentrated in vacuo and purified by flash column chromatography using DCM to DCM/MeOH(30/1) as the eluent to afford **ent-S7** (7.2505 g, 19 mmol, 93% yield) as a brown oil. IR (neat): 3060, 2955, 1598, 1578, 1500, 1476, 1381  $\text{cm}^{-1}$ ; Optical Rotation:  $[\alpha]_{\text{D}}^{20} = +75.1$  (c 1.02,  $\text{CHCl}_3$ );  $^1\text{H}$  NMR (400 MHz,  $\text{CDCl}_3$ ):  $\delta$ 7.74 (d,  $J = 8.0$  Hz, 1H), 7.43 (dd,  $J = 7.6, 0.8$  Hz, 1H), 7.36 (t,  $J = 7.6$  Hz, 1H), 7.10-7.01 (m, 3H), 6.91-6.86 (m, 1H), 6.64 (d,  $J = 7.6$  Hz, 2H), 4.11-3.98 (m, 2H), 3.78 (t,  $J = 8.0$  Hz, 1H), 2.07-1.94 (m, 1H), 1.12 (d,  $J = 6.8$  Hz, 3H), 1.05 (d,  $J = 6.4$  Hz, 3H);  $^{13}\text{C}$  NMR (101 MHz,  $\text{CDCl}_3$ ):  $\delta$ 161.0, 140.6, 139.3, 137.8, 130.5, 130.3, 128.5, 128.0, 122.1, 119.2, 96.2, 70.0, 53.7, 32.8, 19.1, 18.4; HRMS (ESI) calculated for  $[\text{M}+\text{Na}]^+[\text{C}_{18}\text{H}_{19}\text{IN}_2\text{Na}]^+$  requires  $m/z$  413.0491, found  $m/z$  413.0492.

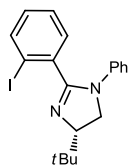

**(S)-4-(tert-butyl)-2-(2-iodophenyl)-1-phenyl-4,5-dihydro-1H-imidazole (S8):**

Prepared according to a previously reported procedure with a slight modification,<sup>6</sup> a 100 mL flame-dried Schlenk flask was washed with nitrogen three times and charged with amide **S8b** (6.96 g, 20 mmol) and SOCl<sub>2</sub> (8.0 mL, 1.60 g/mL, 110 mmol). Then the mixture was refluxed for 12 h. After cooling to room temperature, the mixture was concentrated and the residue was dissolved in 60 mL of DCM/Et<sub>2</sub>O(1/2) and transferred to a 250 mL flame-dried roundbottomed flask. To this reaction mixture, triethylamine (22 mL, 0.73 g/mL, 160 mmol) and aniline (2.0 mL, 1.02 g/mL, 22 mmol) were added in sequence. After stirred at room temperature for 11 h, 10% NaOH (200 mL) was added and stirred for another 5 h. The organic layer was separated and the aqueous layer extracted with DCM (3 × 200 mL). The combined organic phases were dried over anhydrous Na<sub>2</sub>SO<sub>4</sub> and concentrated in vacuo and purified by flash column chromatography using PE/EtOAc (50/1 to 5/1) as the eluent to afford **S8** (8.0620 g, 19.9 mmol, 99% yield) as a yellow oil. IR (neat): 3057, 2950, 1581, 1498, 1477, 1384 cm<sup>-1</sup>; Optical Rotation:  $[\alpha]_D^{20} = -66.1$  (c 0.98, CHCl<sub>3</sub>); <sup>1</sup>H NMR (400 MHz, CDCl<sub>3</sub>): δ 7.75 (dd, *J* = 8.0, 0.8 Hz, 1H), 7.46 (dd, *J* = 7.6, 1.6 Hz, 1H), 7.37 (td, *J* = 7.6, 0.8 Hz, 1H), 7.12-7.01 (m, 3H), 6.89 (t, *J* = 7.6 Hz, 1H), 6.65 (dd, *J* = 8.4, 0.8 Hz, 2H), 4.06-3.95 (m, 2H), 3.88-3.70 (m, 1H), 1.07 (s, 9H); <sup>13</sup>C NMR (101 MHz, CDCl<sub>3</sub>): δ 161.2, 140.8, 139.4, 138.0, 130.5, 128.5, 128.1, 122.2, 119.4, 96.2, 73.8, 52.4, 34.2, 26.3; HRMS (ESI) calculated for [M+Na]<sup>+</sup>[C<sub>19</sub>H<sub>21</sub>IN<sub>2</sub>Na]<sup>+</sup> requires *m/z* 427.0647, found *m/z* 427.0652.

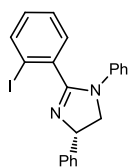

**(S)-2-(2-iodophenyl)-1,4-diphenyl-4,5-dihydro-1H-imidazole (S9):**

Prepared according to a previously reported procedure with a slight modification,<sup>6</sup> a 100 mL flame-dried Schlenk flask was washed with nitrogen three times and charged with amide **S9b** (5.04 g, 13.7 mmol) and SOCl<sub>2</sub> (8.0 mL, 1.60 g/mL, 110 mmol). Then the mixture was refluxed for 11 h. After cooling to room temperature, the mixture was concentrated and the residue was dissolved in 150 mL DCM/Et<sub>2</sub>O (1/2) and transferred to a 250 mL flame-dried roundbottomed flask. To this reaction mixture, triethylamine (22 mL, 0.73 g/mL, 160 mmol) and aniline (1.5 mL, 1.02 g/mL, 16.5 mmol) were added in sequence. After stirred at room temperature for 22 h, 10% NaOH (200 mL) was added and stirred for another 5 h. The organic layer was separated and the aqueous layer extracted with DCM (3 × 200 mL). The combined organic phases were dried over

anhydrous Na<sub>2</sub>SO<sub>4</sub> and concentrated in vacuo and purified by flash column chromatography using PE/EtOAc (50/1 to 5/1) as the eluent to afford **S9** (3.2776 g, 7.7 mmol, 56% yield) as a yellow oil. IR (neat): 3058, 2973, 1602, 1575, 1496, 1476, 1383 cm<sup>-1</sup>; Optical Rotation:  $[\alpha]_D^{20} = -136.1$  (c 0.99, CHCl<sub>3</sub>); <sup>1</sup>H NMR (400 MHz, CDCl<sub>3</sub>): δ 7.76 (d, *J* = 7.6 Hz, 1H), 7.53 (d, *J* = 7.2 Hz, 3H), 7.43-7.35 (m, 3H), 7.33-7.25 (m, 1H), 7.13-7.02 (m, 3H), 6.91 (t, *J* = 7.6 Hz, 1H), 6.67 (d, *J* = 8.0 Hz, 2H), 5.37 (t, *J* = 10.0 Hz, 1H), 4.39 (t, *J* = 10.0 Hz, 1H), 4.03 (t, *J* = 9.6 Hz, 1H); <sup>13</sup>C NMR (101 MHz, CDCl<sub>3</sub>): δ 162.4, 143.3, 140.4, 139.4, 137.5, 130.8, 130.5, 128.6, 128.5, 128.2, 127.2, 127.1, 122.7, 119.5, 96.3, 67.5, 59.2; HRMS (ESI) calculated for [M+Na]<sup>+</sup>[C<sub>22</sub>H<sub>17</sub>IN<sub>2</sub>Na]<sup>+</sup> requires m/z 447.0334, found m/z 447.0330.

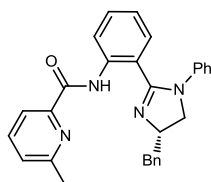

**(S)-N-(2-(4-benzyl-1-phenyl-4,5-dihydro-1H-imidazol-2-yl)phenyl)-6-methylpicolinamide (L6):** Prepared according to a previously reported

procedure with a slight modification,<sup>7</sup> a 50 mL flame-dried Schlenk flask was washed with nitrogen three times and charged with CuI (0.0765 g, 0.4

mmol), toluene (15 mL) and *N,N'*-dimethylethylenediamine (80 uL, 0.90 g/mL, 0.8 mmol). After the mixture was stirred at room temperature for 5 min, 6-methylpicolinamide (0.3408 g, 2.5 mmol), **S6** (0.8102 g, 1.85 mmol, 1.0 eq.) and K<sub>3</sub>PO<sub>4</sub> (0.8480 g, 4.0 mmol) were added to the flask under N<sub>2</sub> atmosphere. The mixture was refluxed for 48 h. After cooling to room temperature, the mixture was filtered and washed with EtOAc. The combined filtrate were concentrated and purified by column chromatography using PE/EA = 10:1 as the eluent to afford the title compound (0.5128 g, 62% yield) as a light yellow solid. M.P.: 128.0-129.8 °C; IR (neat): 3062, 2874, 1679, 1585, 1517, 1446, 1379 cm<sup>-1</sup>; Optical Rotation:  $[\alpha]_D^{20} = +51.5$  (c 1.00, CHCl<sub>3</sub>); <sup>1</sup>H NMR (400 MHz, CDCl<sub>3</sub>): δ 12.58 (s, 1H), 8.76 (d, *J* = 8.0 Hz, 1H), 8.13 (d, *J* = 7.6 Hz, 1H), 7.77 (t, *J* = 7.6 Hz, 1H), 7.39 (t, *J* = 7.6 Hz, 1H), 7.31 (d, *J* = 8.0 Hz, 1H), 7.29-7.25 (m, 4H), 7.23-7.17 (m, 1H), 7.14 (d, *J* = 7.6 Hz, 1H), 7.08 (t, *J* = 7.6 Hz, 2H), 6.91 (dt, *J* = 10.8, 7.6 Hz, 2H), 6.65 (d, *J* = 8.0 Hz, 2H), 4.81-4.70 (m, 1H), 3.98 (t, *J* = 9.6 Hz, 1H), 3.85-3.70 (m, 1H), 3.49 (dd, *J* = 13.6, 4.4 Hz, 1H), 2.88 (dd, *J* = 13.6, 9.2 Hz, 1H), 2.68 (s, 3H); <sup>13</sup>C NMR (101 MHz, CDCl<sub>3</sub>): δ 163.4, 159.9, 157.1, 150.0, 142.7, 138.2, 137.7, 137.5, 130.7, 130.0, 129.3, 128.7, 128.5, 126.4, 126.0, 123.5, 122.8, 122.3, 121.4, 119.9, 119.5, 66.1, 57.2, 42.4, 24.5; HRMS (ESI) calculated for [M+Na]<sup>+</sup>[C<sub>29</sub>H<sub>26</sub>N<sub>4</sub>ONa]<sup>+</sup> requires m/z 469.2004, found m/z 469.1997.

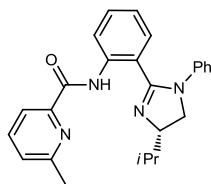

**(S)-N-(2-(4-isopropyl-1-phenyl-4,5-dihydro-1H-imidazol-2-yl)phenyl)-6-methylpicolinamide (L7):**

Prepared according to a previously reported procedure with a slight modification,<sup>7</sup> a 50 mL flame-dried Schlenk flask was washed with nitrogen three times and charged with CuI (0.0362 g, 0.19 mmol), *o*-xylene (5.0 mL) and *N, N'*-dimethylethylenediamine (40  $\mu$ L, 0.90 g/mL, 0.4 mmol). After the mixture was stirred at room temperature for 5 min, 6-methylpicolinamide (0.1602 g, 1.2 mmol), **S7** (0.3918 g, 1.0 mmol, 1.0 eq.) and  $K_3PO_4$  (0.4345 g, 2.0 mmol) were added to the flask under  $N_2$  atmosphere. The mixture was refluxed for 36 h. After cooling to room temperature, the mixture was filtered and washed with EtOAc. The combined filtrate were concentrated and purified by column chromatography using PE/EA = 10:1 as the eluent to afford the title compound (0.3090 g, 77% yield) as a light yellow solid. M.P.: 147.0-148.5  $^{\circ}C$ ; IR (neat): 3064, 2874, 1679, 1586, 1516, 1445, 1377  $cm^{-1}$ ; Optical Rotation:  $[\alpha]_D^{20} = -28.7$  (c 0.90, MeOH);  $^1H$  NMR (400 MHz,  $CDCl_3$ ):  $\delta$  12.28 (s, 1H), 8.68 (d,  $J = 8.4$  Hz, 1H), 8.10 (d,  $J = 8.0$  Hz, 1H), 7.76 (t,  $J = 7.6$  Hz, 1H), 7.42-7.34 (m, 1H), 7.31 (d,  $J = 8.0$  Hz, 1H), 7.18 (dd,  $J = 7.6, 1.6$  Hz, 1H), 7.11 (t,  $J = 7.6$  Hz, 2H), 6.97-6.80 (m, 2H), 6.75 (d,  $J = 7.6$  Hz, 2H), 4.35-4.28 (m, 1H), 4.00 (dd,  $J = 10.4, 9.2$  Hz, 1H), 3.80 (dd,  $J = 9.2, 8.8$  Hz, 1H), 2.67 (s, 3H), 2.20-2.06 (m, 1H), 1.10 (d,  $J = 6.8$  Hz, 3H), 0.96 (d,  $J = 6.8$  Hz, 3H);  $^{13}C$  NMR (101 MHz,  $CDCl_3$ ):  $\delta$  163.3, 159.3, 157.1, 150.0, 142.7, 137.40, 137.37, 130.4, 129.8, 128.6, 125.9, 123.3, 123.0, 122.1, 121.7, 120.2, 119.8, 70.8, 54.9, 32.9, 24.4, 19.4, 17.6. HRMS (ESI) calculated for  $[M+Na]^+[C_{25}H_{26}N_4ONa]^+$  requires  $m/z$  421.2004, found  $m/z$  421.2000.

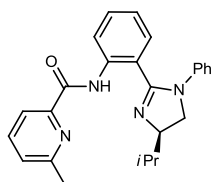

**(R)-N-(2-(4-isopropyl-1-phenyl-4,5-dihydro-1H-imidazol-2-yl)phenyl)-6-methylpicolinamide (ent-L7):**

Prepared according to a previously reported procedure with a slight modification,<sup>7</sup> a 50 mL flame-dried Schlenk flask was washed with nitrogen three times and charged with CuI (0.1526 g, 0.8 mmol), xylene (12 mL) and *N, N'*-dimethylethylenediamine (0.1428 g, 1.6 mmol). After the mixture was stirred at room temperature for 5 min, 6-methylpicolinamide (0.6548 g, 4.8 mmol), **ent-S7** (1.5533 g, 4.0 mmol, 1.0 eq.) and  $K_3PO_4$  (1.69 g, 8.0 mmol) were added to the flask under  $N_2$  atmosphere. The mixture was refluxed for 96 h. After cooling to room temperature, the mixture was filtered and washed with EtOAc. The combined filtrate were concentrated and purified by

column chromatography using PE/EA = 10:1 as the eluent to afford the title compound (0.5870 g, 37% yield) as a light yellow solid. M.P.: 147.3-148.8°C; IR (neat): 2956, 2926, 1680, 1587, 1516, 1446, 1378 cm<sup>-1</sup>; Optical Rotation:  $[\alpha]_{\text{D}}^{20} = +29.1$  (c 1.00, MeOH); <sup>1</sup>H NMR (400 MHz, CDCl<sub>3</sub>): δ 12.29 (s, 1H), 8.69 (d, *J* = 8.4 Hz, 1H), 8.10 (d, *J* = 7.6 Hz, 1H), 7.82-7.70 (m, 1H), 7.38 (dd, *J* = 8.4, 7.6 Hz, 1H), 7.30 (d, *J* = 8.0 Hz, 1H), 7.19 (dd, *J* = 7.6, 1.6 Hz, 1H), 7.10 (dd, *J* = 8.4, 7.6 Hz, 2H), 7.00-6.86 (m, 2H), 6.75 (d, *J* = 7.6 Hz, 2H), 4.40-4.25 (m, 1H), 4.00 (dd, *J* = 10.4, 9.6 Hz, 1H), 3.80 (dd, *J* = 9.2, 8.8 Hz, 1H), 2.66 (s, 3H), 2.16-2.07 (m, 1H), 1.10 (d, *J* = 6.8 Hz, 3H), 0.96 (d, *J* = 6.8 Hz, 3H); <sup>13</sup>C NMR (101 MHz, CDCl<sub>3</sub>): 163.3, 159.2, 157.0, 150.0, 142.7, 137.4, 137.3, 130.4, 129.8, 128.6, 125.9, 123.2, 122.9, 122.1, 121.6, 120.1, 119.8, 70.7, 54.9, 32.8, 24.3, 19.3, 17.6; HRMS (ESI) calculated for [M+Na]<sup>+</sup>[C<sub>25</sub>H<sub>26</sub>N<sub>4</sub>ONa]<sup>+</sup> requires *m/z* 421.2004, found *m/z* 421.2001.

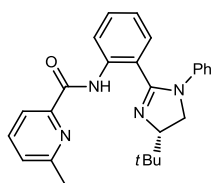

**(S)-N-(2-(4-(tert-butyl)-1-phenyl-4,5-dihydro-1H-imidazol-2-yl)phenyl)-6-methylpicolinamide (L8):** Prepared according to a previously reported

procedure with a slight modification,<sup>7</sup> a 50 mL flame-dried Schlenk flask was washed with nitrogen three times and charged with CuI (0.0782 g, 0.4

mmol), toluene (15 mL) and *N, N'*-dimethylethylenediamine (80 uL, 0.90 g/mL, 0.8 mmol). After the mixture was stirred at room temperature for 5 min, 6-methylpicolinamide (0.3258 g, 2.4 mmol), **S8** (0.8059 g, 2.0 mmol, 1.0 eq.) and K<sub>3</sub>PO<sub>4</sub> (0.8499 g, 4.0 mmol) were added to the flask under N<sub>2</sub> atmosphere. The mixture was refluxed for 36 h. After cooling to room temperature, the mixture was filtered and washed with EtOAc. The combined filtrate were concentrated and purified by column chromatography using PE/EA = 10:1 and PE/EA = 5:1 as the eluent to afford the title compound (0.3830 g, 47% yield) as a light yellow solid. M.P.: 150.3-151.9 °C; IR (neat): 3063, 2954, 1680, 1591, 1515, 1445, 1377 cm<sup>-1</sup>; Optical Rotation:  $[\alpha]_{\text{D}}^{20} = -22.7$  (c 1.08, CHCl<sub>3</sub>); <sup>1</sup>H NMR (400 MHz, CDCl<sub>3</sub>): δ 11.96 (s, 1H), 8.58 (d, *J* = 8.4 Hz, 1H), 8.08 (d, *J* = 7.6 Hz, 1H), 7.76 (t, *J* = 7.6 Hz, 1H), 7.42-7.35 (m, 1H), 7.31 (d, *J* = 7.6 Hz, 1H), 7.22 (dd, *J* = 7.6, 1.2 Hz, 1H), 7.10 (t, *J* = 8.0 Hz, 2H), 6.97-6.90 (m, 2H), 6.75 (d, *J* = 7.6 Hz, 2H), 4.21 (dd, *J* = 10.4, 9.2 Hz, 1H), 3.96-3.80 (m, 2H), 2.67 (s, 3H), 1.03 (s, 9H); <sup>13</sup>C NMR (101 MHz, CDCl<sub>3</sub>): δ 163.4, 159.2, 157.1, 150.0, 142.8, 137.3, 137.1, 130.3, 129.7, 128.6, 126.0, 123.25, 123.17, 122.1, 120.8, 119.9, 74.5, 54.0, 34.2, 26.1, 24.6; HRMS (ESI) calculated for [M+Na]<sup>+</sup>[C<sub>26</sub>H<sub>28</sub>N<sub>4</sub>ONa]<sup>+</sup> requires *m/z*



435.2161, found  $m/z$  435.2155.

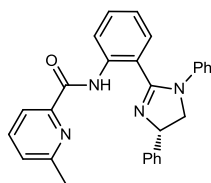

**(S)-N-(2-(1,4-diphenyl-4,5-dihydro-1H-imidazol-2-yl)phenyl)-6-methylpicolinamide (L9):** Prepared according to a previously reported procedure with a slight modification,<sup>7</sup> a 50 mL flame-dried Schlenk flask was washed with nitrogen three times and charged with CuI (0.0380 g, 0.2 mmol), dioxane (8 mL) and ethylene diamine (15  $\mu$ L, 0.90 g/mL, 0.2 mmol). After the mixture was stirred at room temperature for 5 min, 6-methylpicolinamide (0.1708 g, 1.3 mmol), **S9** (0.4245 g, 1.0 mmol, 1.0 eq.) and  $K_3PO_4$  (0.4338 g, 2.0 mmol) were added to the flask under  $N_2$  atmosphere. The mixture was refluxed for 48 h. After cooling to room temperature, the mixture was filtered and washed with EtOAc. The combined filtrate were concentrated and purified by column chromatography using PE/EA = 10:1 as the eluent to afford the title compound (0.2361 g, 53% yield) as a light yellow solid. M.P.: 178.0-180.2  $^{\circ}C$ ; IR (neat): 3062, 2876, 1679, 1585, 1517, 1446, 1377  $cm^{-1}$ ; Optical Rotation:  $[\alpha]_D^{20} = +71.0$  (c 1.06,  $CHCl_3$ );  $^1H$  NMR (400 MHz,  $CDCl_3$ ):  $\delta$  12.84 (s, 1H), 8.75 (d,  $J = 8.4$  Hz, 1H), 8.06 (d,  $J = 7.6$  Hz, 1H), 7.72 (t,  $J = 7.6$  Hz, 1H), 7.45-7.37 (m, 3H), 7.30-7.16 (m, 5H), 7.13 (t,  $J = 8.0$  Hz, 2H), 6.99-6.80 (m, 2H), 6.80 (dd,  $J = 8.4, 0.8$  Hz, 2H), 5.59 (dd,  $J = 10.4, 8.8$  Hz, 1H), 4.44 (dd,  $J = 10.8, 9.6$  Hz, 1H), 3.94 (dd,  $J = 9.2, 8.8$  Hz, 1H), 2.21 (s, 3H);  $^{13}C$  NMR (101 MHz,  $CDCl_3$ ):  $\delta$  163.5, 160.8, 157.3, 149.8, 143.6, 142.8, 138.0, 137.3, 130.9, 130.2, 128.8, 128.5, 127.3, 126.8, 125.7, 123.7, 122.8, 122.5, 121.5, 119.5, 119.2, 68.4, 61.0, 23.7; HRMS (ESI) calculated for  $[M+Na]^+[C_{28}H_{24}N_4ONa]^+$  requires  $m/z$  455.1848, found  $m/z$  455.1842.

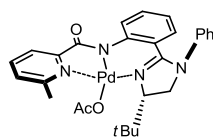

**(L8-H) PdOAc.** A 25 mL Schlenk flask was charged with 0.1131 g (0.5 mmol) of  $Pd(OAc)_2$ , 8 mL of THF and 0.2263 g (0.55 mmol) of **L8** under atmosphere of nitrogen. The mixture was stirred at room temperature for 17 h. The resulting solvent was concentrated *in vacuo* and the resulting residue was washed with ether and dried *in vacuo* to afford 0.2290 g (3.6 mmol, 72% yield) of the title compound as a yellow powder.  $^1H$  NMR (400 MHz,  $CDCl_3$ ):  $\delta$  8.18 (d,  $J = 8.4$  Hz, 1H), 7.96 (d,  $J = 7.2$  Hz, 1H), 7.85 (dd,  $J = 7.6, 8.0$  Hz, 1H), 7.28-7.19 (m, 4H), 7.12 (dd,  $J = 7.6, 7.2$  Hz, 1H), 6.98 (d,  $J = 8.0$  Hz, 1H), 6.89 (d,  $J = 7.6$  Hz, 2H), 6.61 (t,  $J = 7.6$  Hz, 1H), 4.26 (t,  $J = 10.0$  Hz, 1H), 3.88 (d,  $J =$

10.4 Hz, 1H), 3.81 (d,  $J = 9.6$  Hz, 1H), 2.63 (s, 3H), 2.04 (s, 3H), 1.16 (s, 9H);  $^{13}\text{C}$  NMR (101 MHz,  $\text{CDCl}_3$ ):  $\delta$ 177.6, 169.7, 161.1, 160.0, 156.5, 145.6, 142.3, 139.0, 132.1, 131.9, 129.1, 128.4, 125.5, 124.2, 124.0, 123.4, 121.0, 118.0, 77.2, 68.7, 55.8, 35.2, 26.1, 24.1, 23.5.

CCDC number of (**L8-H**) PdOAc:1588226

X-ray structure of (**L8-H**) PdOAc

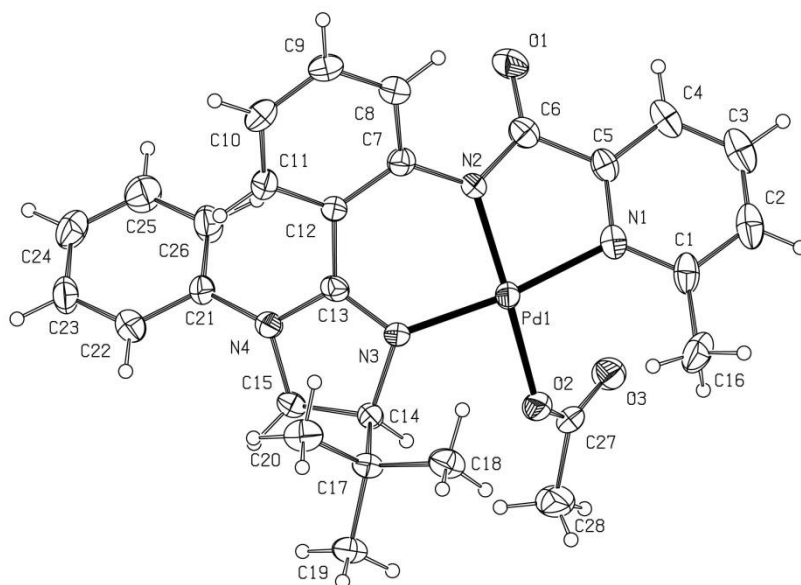

**Supplementary Table 3.** Crystal data and structure refinement of compound (**L8-H**) PdOAc

| Crystal data                | ( <b>L8-H</b> ) PdOAc                                         |
|-----------------------------|---------------------------------------------------------------|
| Empirical formula           | $\text{C}_{28} \text{H}_{30} \text{N}_4 \text{O}_3 \text{Pd}$ |
| Formula weight              | 576.96                                                        |
| Temperature (K)             | 293                                                           |
| Wavelength ( $\text{\AA}$ ) | 0.71073                                                       |
| Crystal system              | orthorhombic                                                  |
| space group                 | P 21 21 21                                                    |
| a ( $\text{\AA}$ )          | 9.827 (2)                                                     |
| b ( $\text{\AA}$ )          | 11.278 (2)                                                    |
| c ( $\text{\AA}$ )          | 23.384 (5)                                                    |
| alpha                       | 90                                                            |

|                                            |                                   |
|--------------------------------------------|-----------------------------------|
| beta                                       | 90                                |
| gamma                                      | 90                                |
| Volume (Å <sup>3</sup> )                   | 2591.5 (9)                        |
| Z                                          | 4                                 |
| Calculated density (mg/m <sup>3</sup> )    | 1.479                             |
| Absorption coefficient (mm <sup>-1</sup> ) | 0.753                             |
| F(000)                                     | 1184.0                            |
| Theta range                                | 2.884 - 25.349                    |
| Limiting indices                           | -11<=h<=9, -13<=k<=13, -28<=l<=23 |
| Absorption correction                      | multi-scan                        |
| Max. and min. transmission                 | 1.000 and 0.931                   |
| Data/restraints/parameters                 | 4733 / 0 / 330                    |
| Goodness-of-fit on F <sup>2</sup>          | 1.037                             |
| Final R indices [I>4sigma(I)]              | R = 0.0369, wR = 0.0768           |
| R indices (all data)                       | R = 0.0496, wR = 0.0836           |

## Procedures for Synthesis of Starting Materials

**General procedure A for preparation of alkenes:** Under N<sub>2</sub> atmosphere, a 100 mL flame-dried Schlenk flask was charged with RP<sup>+</sup>Ph<sub>3</sub>X<sup>-</sup> (12mmol, 1.2 eq.) and 30 mL of THF. *n*-BuLi (14.4 mmol, 5.8 mL, 2.5 M in THF) was added dropwise over 10 min at -20 °C. After stirred at -20 °C for 40 min, the corresponding aldehyde in 10 mL of THF was added dropwise. Then the mixture was warmed to room temperature slowly and stirred for another 18 h. After completion of the reaction, the reaction mixture was quenched with saturated solution of NH<sub>4</sub>Cl (25~30 mL) under ice cooling and the organic layer was separated. The aqueous layer was extracted with EtOAc (2x30 mL). The combined organic phases were dried over anhydrous Na<sub>2</sub>SO<sub>4</sub> and concentrated in vacuo. The resulting crude product was purified by column chromatography (silica gel, 200-300 mesh) to afford the corresponding alkene (a mixture of *E/Z* isomer and the ratio is unknown).

**General procedures B for preparation of alkenes:** Under N<sub>2</sub> atmosphere, a 100 mL flame-dried Schlenk flask was charged with RP<sup>+</sup>Ph<sub>3</sub>X<sup>-</sup> (12mmol, 1.2 eq.), NaH (14.4 mmol) and 30 mL of THF. The mixture was refluxed for 2 h. Then the corresponding aldehyde in 10 mL of THF was

added dropwise at 0 °C. Then the mixture was warmed to room temperature and refluxed for 4-12 h. After completion of the reaction, the reaction mixture was quenched with saturated solution of NH<sub>4</sub>Cl (25~30 mL) under ice cooling and the organic layer was separated. The aqueous layer was extracted with EtOAc (2x20 mL). The combined organic phases were dried over anhydrous Na<sub>2</sub>SO<sub>4</sub> and concentrated in vacuo. The resulting crude product was purified by column chromatography (silica gel, 200-300 mesh) to afford the corresponding alkene (a mixture of *E/Z* isomer and the ratio is unknown).

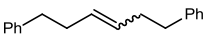 **(*E/Z*)-1,6-diphenylhex-3-ene (1a)**: Prepared from phenylpropyl aldehyde according to the general procedure A. *Z/E* ratio: 4.1/1, 67% yield, colorless oil. <sup>1</sup>H NMR (400 MHz, CDCl<sub>3</sub>): δ 7.30-7.22 (m, 4H), 7.21-7.12 (m, 6H), 5.49-5.37 (m, 2H), 2.68-2.62 (m, 0.80H), 2.62-2.53 (m, 3.26H), 2.35-2.25 (m, 4H). All the spectroscopic data were in agreement with the reported ones.<sup>8</sup>

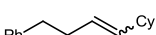 **(*E/Z*)-(4-cyclohexylbut-3-en-1-yl)benzene (1b)**: Prepared from phenylpropyl aldehyde according to the general procedure A. *Z/E* ratio: 4.7/1, 64% yield, colorless oil. <sup>1</sup>H NMR (400 MHz, CDCl<sub>3</sub>): δ 7.30-7.23 (m, 2H), 7.20-7.14 (m, 3H), 5.41-5.36 (m, 0.34H), 5.33-5.18 (m, 1.64H), 2.68-2.62 (m, 2H), 2.39-2.32 (m, 1.70H), 2.31-2.25 (m, 0.36H), 2.23-2.12 (m, 0.84H), 1.94-1.83 (m, 0.20H), 1.74-1.58 (m, 3.46H), 1.54-1.45 (m, 1.80H), 1.30-0.94 (m, 5H). All the spectroscopic data were in agreement with the reported ones.<sup>9</sup>

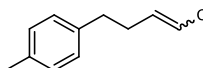 **(*E/Z*)-1-(4-cyclohexylbut-3-en-1-yl)-4-methylbenzene (1c)**: Prepared from 3-(*p*-tolyl)propanal according to the general procedure A. *Z/E* ratio: 4.0/1, 42% yield, colorless oil. IR (neat): 3005, 2925, 2851, 1515, 1446 cm<sup>-1</sup>; <sup>1</sup>H NMR (400 MHz, CDCl<sub>3</sub>): δ 7.12-7.04 (m, 4H), 5.42-5.17 (m, 2H), 2.65-2.58 (m, 2H), 2.39-2.12 (m, 5.81H), 1.94-1.82 (m, 0.19H), 1.75-1.58 (m, 3.45H), 1.53-1.47 (m, 1.58H), 1.31-0.85 (m, 5H). HRMS (ESI) calculated for [M+H]<sup>+</sup>[C<sub>17</sub>H<sub>25</sub>]<sup>+</sup> requires m/z 229.1956, found m/z 229.1951.

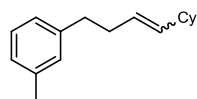

**(E/Z)-1-(4-cyclohexylbut-3-en-1-yl)-3-methylbenzene (1d):** Prepared from 3-(*m*-tolyl)propanal according to the general procedure A. *Z/E* ratio: 3.4/1, 26% yield, colorless oil. IR (neat): 3005, 2924, 2851, 1607, 1488, 1447  $\text{cm}^{-1}$ ;  $^1\text{H}$  NMR (400 MHz,  $\text{CDCl}_3$ ):  $\delta$  7.19-7.12 (m, 1H), 7.03-6.95 (m, 3H), 5.45-5.36 (m, 0.45H), 5.33-5.18 (m, 1.53H), 2.66-2.59 (m, 2H), 2.40- 2.14 (m, 5.83H), 2.01-1.82 (m, 0.27H), 1.73-1.58 (m, 3.43H), 1.55-1.46 (m, 1.65H), 1.31-0.84 (m, 5H). HRMS (ESI) calculated for  $[\text{M}+\text{H}]^+[\text{C}_{17}\text{H}_{25}]^+$  requires  $m/z$  229.1956, found  $m/z$  229.1949.

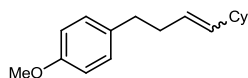

**(E/Z)-1-(4-cyclohexylbut-3-en-1-yl)-4-methoxybenzene (1e):** Prepared from 3-(4-methoxyphenyl)propanal according to the general procedure A. *Z/E* ratio: 2.9/1, 52% yield, colorless oil. IR (neat): 3002, 2924, 2849, 1513, 1450, 1247  $\text{cm}^{-1}$ ;  $^1\text{H}$  NMR (400 MHz,  $\text{CDCl}_3$ ):  $\delta$  7.13-7.06 (m, 2H), 6.85-6.80 (m, 2H), 5.43-5.36 (m, 0.50H), 5.32-5.17 (m, 1.46H), 3.78 (s, 3H), 2.64-2.55 (m, 2H), 2.37-2.28 (m, 1.50H), 2.26-2.10 (m, 1.25H), 1.95-1.84 (m, 0.28H), 1.74-1.46 (m, 5H), 1.30-0.84 (m, 5H). HRMS (ESI) calculated for  $[\text{M}+\text{Na}]^+[\text{C}_{17}\text{H}_{24}\text{ONa}]^+$  requires  $m/z$  267.1725, found  $m/z$  267.1732.

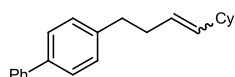

**(E/Z)-4-(4-cyclohexylbut-3-en-1-yl)-1,1'-biphenyl (1f):** Prepared from 3-([1,1'-biphenyl]-4-yl)propanal according to the general procedure A. *Z/E* ratio: 4.3/1, 62% yield, colorless oil. IR (neat): 2921, 2848, 1486, 1447  $\text{cm}^{-1}$ ;  $^1\text{H}$  NMR (400 MHz,  $\text{CDCl}_3$ ):  $\delta$  7.62-7.54 (m, 2H), 7.53-7.47 (m, 2H), 7.46-7.37 (dd,  $J = 8.0, 7.2$  Hz, 2H), 7.34-7.20 (m, 3H), 5.49-5.0 (m, 2H), 2.70 (t,  $J = 8.0$  Hz, 2H), 2.48-2.36 (m, 1.64H), 2.35-2.28 (m, 0.36H), 2.26-2.12 (m, 0.81H), 1.96-1.84 (m, 0.19H), 1.74-1.41 (m, 5H), 1.30-0.86 (m, 5H). HRMS (ESI) calculated for  $[\text{M}+\text{H}]^+[\text{C}_{22}\text{H}_{27}]^+$  requires  $m/z$  291.2113, found  $m/z$  291.2120.

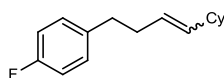

**(E/Z)-1-(4-cyclohexylbut-3-en-1-yl)-4-fluorobenzene (1g):** Prepared from 3-(4-fluorophenyl)propanal according to the general procedure A. *Z/E* ratio: 3.7/1, 33% yield, colorless oil. IR (neat): 3005, 2926, 2852, 1604, 1511, 1449, 1227  $\text{cm}^{-1}$ ;  $^1\text{H}$  NMR (400 MHz,  $\text{CDCl}_3$ ):  $\delta$  7.17-7.08 (m, 2H), 7.00-6.91 (m, 2H), 5.38-5.34 (m, 0.42H), 5.30-5.17 (m, 1.54H), 2.62 (t,  $J = 7.6$  Hz, 2H), 2.37-2.30 (m, 1.60H), 2.28-2.22 (m, 0.43H), 2.21-2.10 (m, 0.79H), 1.97-1.79 (m, 0.25H), 1.73-1.58 (m, 3.47H), 1.52-1.43 (m, 1.61H), 1.30-0.84 (m, 5H).  $^{19}\text{F}$

NMR (376 MHz, CDCl<sub>3</sub>):  $\delta$  -118.0, -118.1. HRMS (ESI) calculated for [M+Na]<sup>+</sup>[C<sub>16</sub>H<sub>21</sub>FN<sub>a</sub>]<sup>+</sup> requires m/z 255.1525, found m/z 255.1532.

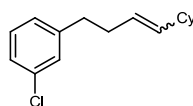

**(E/Z)-1-chloro-3-(4-cyclohexylbut-3-en-1-yl)benzene (1h):** Prepared from 3-(3-chlorophenyl)propanal according to the general procedure A. *Z/E* ratio: 4.0/1, 49% yield, colorless oil. IR (neat): 3003, 2926, 2851, 1598, 1478, 1443 cm<sup>-1</sup>; <sup>1</sup>H NMR (400 MHz, CDCl<sub>3</sub>):  $\delta$  7.22-7.12 (m, 3H), 7.08-7.01 (m, 1H), 5.37-5.33 (m, 0.39H), 5.29-5.18 (m, 1.55H), 2.62 (dd, *J* = 8.0, 6.8 Hz, 1H), 2.39-2.30 (m, 1.62H), 2.29-2.22 (m, 0.42H), 2.21-2.09 (m, 0.79H), 1.93-1.82 (m, 0.22H), 1.74-1.57 (m, 3.48H), 1.51-1.43 (m, 1.61H), 1.31-0.94 (m, 5H). HRMS (ESI) calculated for [M+H]<sup>+</sup>[C<sub>16</sub>H<sub>22</sub>Cl]<sup>+</sup> requires m/z 249.1410 found m/z 249.1417.

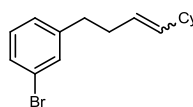

**(E/Z)-1-bromo-3-(4-cyclohexylbut-3-en-1-yl)benzene (1i):** Prepared from 3-(3-bromophenyl)propanal according to the general procedure A. *Z/E* ratio: 3.5/1, 67% yield, colorless oil. IR (neat): 3000, 2922, 2849, 1567, 1447 cm<sup>-1</sup>; <sup>1</sup>H NMR (400 MHz, CDCl<sub>3</sub>):  $\delta$  7.38-7.27 (m, 2H), 7.16-7.06 (m, 2H), 5.40-5.30 (m, 0.44H), 5.29-5.17 (m, 1.56H), 2.65-2.58 (m, 2H), 2.38-2.31 (m, 1.62H), 2.29-2.23 (m, 0.46H), 2.20-2.09 (m, 0.78H), 1.92-1.83 (m, 0.22H), 1.71-1.56 (m, 3.44H), 1.51-1.43 (m, 1.62H), 1.29-0.95 (m, 5H); HRMS (EI) calculated for [C<sub>16</sub>H<sub>21</sub>Br]<sup>+</sup> requires m/z 292.0827, found m/z 292.0830.

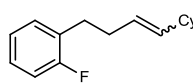

**(E/Z)-1-(4-cyclohexylbut-3-en-1-yl)-2-fluorobenzene (1j):** Prepared from 3-(2-fluorophenyl)propanal according to the general procedure A. *Z/E* ratio: 4.6/1, 64% yield, colorless oil. IR (neat): 3001, 2923, 2850, 1492, 1449, 1229 cm<sup>-1</sup>; <sup>1</sup>H NMR (400 MHz, CDCl<sub>3</sub>):  $\delta$  7.23-7.11 (m, 2H), 7.08-6.94 (m, 2H), 5.47-5.34 (m, 0.36H), 5.34-5.14 (m, 1.64H), 2.68 (t, *J* = 7.6 Hz, 2H), 2.42-2.32 (m, 1.64H), 2.31-2.24 (m, 0.37H), 2.23-2.04 (m, 0.82H), 1.92-1.83 (m, 0.18H), 1.72-1.57 (m, 3.43H), 1.50-1.42 (m, 1.66H), 1.29-1.10 (m, 3H), 1.06-0.91 (m, 2H); <sup>19</sup>F NMR: (376 MHz, CDCl<sub>3</sub>) :  $\delta$  -118.9; HRMS (EI) calculated for [C<sub>16</sub>H<sub>21</sub>F]<sup>+</sup> requires m/z 232.1627, found m/z 232.1631.

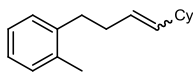

**(E/Z)-1-(4-cyclohexylbut-3-en-1-yl)-2-methylbenzene (1k):** Prepared

from 3-(*o*-tolyl)propanal according to the general procedure A. *Z/E* ratio: 4.7/1, 65% yield, colorless oil. IR (neat): 3002, 2923, 2850, 1492, 1449  $\text{cm}^{-1}$ ;  $^1\text{H}$  NMR (400 MHz,  $\text{CDCl}_3$ ):  $\delta$  7.19-7.01 (m, 4H), 5.48-5.37 (m, 0.35H), 5.37-5.15 (m, 1.65H), 2.67-2.59 (m, 2H), 2.36-2.15 (m, 5.84H), 1.94-1.84 (m, 0.17H), 1.74-1.57 (m, 3.40H), 1.56-1.44 (m, 1.71H), 1.30-0.94 (m, 5H); HRMS (ESI) calculated for  $[\text{M}+\text{H}]^+[\text{C}_{17}\text{H}_{25}]^+$  requires  $m/z$  229.1956, found  $m/z$  229.1949.

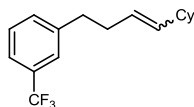

**(E/Z)-1-(4-cyclohexylbut-3-en-1-yl)-3-(trifluoromethyl)benzene (1l):**

Prepared from 3-(3-(trifluoromethyl)phenyl)propanal according to the general procedure A. *Z/E* ratio: 3.6/1, 57% yield, colorless oil. IR (neat): 3005, 2930, 2853, 1447, 1329, 1167, 1129  $\text{cm}^{-1}$ ;  $^1\text{H}$  NMR (400 MHz,  $\text{CDCl}_3$ ):  $\delta$  7.47-7.31 (m, 4H), 5.39-5.32 (m, 0.43H), 5.30-5.18 (m, 1.54H), 2.72 (t,  $J = 7.6$  Hz, 2H), 2.43-2.33 (m, 1.54H), 2.33-2.26 (m, 0.45H), 2.19-2.06 (m, 0.77H), 1.93-1.82 (m, 0.25H), 1.75-1.56 (m, 3.49H), 1.48-1.38 (m, 1.54H), 1.30-0.92 (m, 5H).  $^{19}\text{F}$  NMR (376 MHz,  $\text{CDCl}_3$ ):  $\delta$  -62.5. HRMS (ESI) calculated for  $[\text{M}+\text{H}]^+[\text{C}_{17}\text{H}_{22}\text{F}_3]^+$  requires  $m/z$  283.1674 found  $m/z$  283.1681.

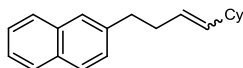

**(E/Z)-2-(4-cyclohexylbut-3-en-1-yl)naphthalene (1m):** Prepared from

3-(naphthalen-2-yl)propanal according to the general procedure A. *Z/E* ratio: 4.2/1, 56% yield, colorless oil. IR (neat): 3003, 2923, 2850, 1600, 1508, 1446  $\text{cm}^{-1}$ ;  $^1\text{H}$  NMR (400 MHz,  $\text{CDCl}_3$ ):  $\delta$  7.83-7.72 (m, 3H), 7.62 (s, 0.79H), 7.60 (s, 0.18H), 7.47-7.36 (m, 2H), 7.35-7.29 (m, 1H), 5.50-5.39 (m, 0.38H), 5.37-5.19 (m, 1.61H), 2.82 (t,  $J = 7.2$  Hz, 2H), 2.50-2.42 (m, 1.64H), 2.40-2.33 (m, 0.4H), 2.28-2.12 (m, 0.81H), 1.93-1.83 (m, 0.21H), 1.73-1.56 (m, 3.39H), 1.54-1.44 (m, 1.83H), 1.30-0.85 (m, 5H). HRMS (ESI) calculated for  $[\text{M}+\text{Na}]^+[\text{C}_{20}\text{H}_{24}\text{Na}]^+$  requires  $m/z$  287.1776 found  $m/z$  287.1780.

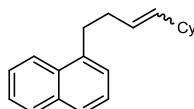

**(E/Z)-1-(4-cyclohexylbut-3-en-1-yl)naphthalene (1n):** Prepared from

3-(naphthalen-1-yl)propanal according to the general procedure A. *Z/E* ratio: 4.5/1, 67% yield, colorless oil. IR (neat): 2922, 2848, 1597, 1511, 1447  $\text{cm}^{-1}$ ;  $^1\text{H}$  NMR (400 MHz,  $\text{CDCl}_3$ ):  $\delta$  8.13-7.99 (m, 1H), 7.92-7.79 (m, 1H), 7.78-7.63 (m, 1H), 7.58-7.43 (m, 2H), 7.42-7.35

(m, 1H), 7.35-7.26 (m, 1H), 5.60-4.98 (m, 2H), 3.20-3.02 (m, 2H), 2.57-2.46 (m, 1.66H), 2.46-2.37 (m, 0.34H), 2.22-1.98 (m, 0.81H), 1.97-1.81 (m, 0.18H), 1.76-1.38 (m, 5H), 1.32-0.88 (m, 5H). HRMS (ESI) calculated for  $[M+Na]^+[C_{20}H_{24}Na]^+$  requires  $m/z$  287.1776, found  $m/z$  287.1783.

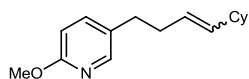

**(E/Z)-5-(4-cyclohexylbut-3-en-1-yl)-2-methoxypyridine (1o):** Prepared from 3-(6-methoxypyridin-3-yl)propanal according to the general procedure A. *Z/E* ratio: 3.9/1, 79% yield, colorless oil. IR (neat): 3004, 2925, 2851, 1609, 1494, 1452, 1391, 1287  $cm^{-1}$ ;  $^1H$  NMR (400 MHz,  $CDCl_3$ ):  $\delta$  7.99-7.93 (m, 1H), 7.44-7.35 (m, 1H), 6.67 (d,  $J = 8.4$  Hz, 1H), 5.38-5.33 (m, 0.40H), 5.29-5.18 (m, 1.56H), 3.91 (s, 3H), 2.57 (t,  $J = 7.2$  Hz, 2H), 2.36-2.28 (m, 1.57H), 2.27-2.20 (m, 0.42H), 2.18-2.07 (m, 0.79H), 1.93-1.82 (m, 0.25H), 1.73-1.56 (m, 3.38H), 1.51-1.42 (m, 1.60H), 1.31-0.80 (m, 5H). HRMS (ESI) calculated for  $[M+H]^+[C_{16}H_{24}NO]^+$  requires  $m/z$  246.1858, found  $m/z$  246.1865.

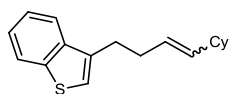

**(E/Z)-3-(4-cyclohexylbut-3-en-1-yl)benzo[b]thiophene (1p):** Prepared from 3-(benzo[b]thiophen-3-yl)propanal according to the general procedure A. *Z/E* ratio: 4.5/1, 55% yield, colorless oil. IR (neat): 2921, 2848, 1447, 1428  $cm^{-1}$ ;  $^1H$  NMR (400 MHz,  $CDCl_3$ ):  $\delta$  7.85 (d, 1H), 7.80-7.70 (m, 1H), 7.44-7.27 (m, 2H), 7.10 (s, 0.78H), 7.08 (s, 0.17H), 5.50-5.00 (m, 2H), 2.89 (t, 2H), 2.56-2.46 (m, 1.68H), 2.46-2.38 (m, 0.32H), 2.24-2.09 (m, 0.81H), 1.96-1.80 (m, 0.18H), 1.74-1.44 (m, 5H), 1.36-0.82 (m, 5H). HRMS (ESI) calculated for  $[M+H]^+[C_{18}H_{23}S]^+$  requires  $m/z$  271.1520, found  $m/z$  271.1526.

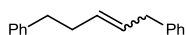

**(E/Z)-pent-2-ene-1,5-diyl dibenzene (1q):** Prepared from phenylacetaldehyde according to the general procedure A. *Z/E* ratio: 5.5/1, 27% yield, colorless oil.  $^1H$  NMR (400 MHz,  $CDCl_3$ ):  $\delta$  7.32-7.06 (m, 10H), 5.62-5.50 (m, 2H), 3.38-3.30 (m, 2H), 2.75-2.67 (m, 2H), 2.52-2.45 (m, 1.71H), 2.39-2.32 (m, 0.31H). All the spectroscopic data were in agreement with the reported ones.<sup>10</sup>

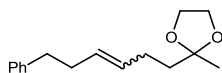

**(E/Z)-2-methyl-2-(6-phenylhex-3-en-1-yl)-1,3-dioxolane (1r):** Prepared



from 3-(2-methyl-1,3-dioxolan-2-yl)propanal<sup>11</sup> according to the general procedure A. *Z/E* ratio: 2.9/1, 67% yield, colorless oil. IR (neat): 2941, 2878, 1602, 1450, 1376, 1058 cm<sup>-1</sup>; <sup>1</sup>H NMR (400 MHz, CDCl<sub>3</sub>): δ 7.31-7.24 (m, 2H), 7.22-7.14 (m, 3H), 5.51-5.30 (m, 2H), 3.96-3.85 (m, 4H), 2.66 (t, *J* = 7.6 Hz, 2H), 2.40-2.33 (m, 1.47H), 2.32-2.25 (m, 0.50H), 2.12-2.03 (m, 2H), 1.72-1.65 (m, 0.53H), 1.63-1.56 (m, 1.53H), 1.31 (s, 0.80H), 1.30 (s, 2.22H). HRMS (ESI) calculated for [M+Na]<sup>+</sup>[C<sub>16</sub>H<sub>22</sub>O<sub>2</sub>Na]<sup>+</sup> requires *m/z* 269.1517, found *m/z* 269.1537.

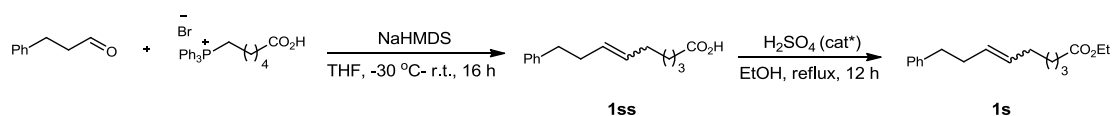

**(*E/Z*)-ethyl 9-phenylnon-6-enoate (1s):** To a dry THF (30 mL) suspension of (6-carboxyhexyl)triphenylphosphonium bromide (13.76 g, 30 mmol), under N<sub>2</sub> atmosphere at -30 °C, NaHMDS (32.5 mL, 2.0 M in THF) was added dropwise over 20 minutes. After stirred at -30 °C for 1 h, phenylpropyl aldehyde (3.10g, 23 mmol) in 10 mL THF was added dropwise. Then the mixture was warmed to room temperature slowly and stirred for another 15 h. After completion of the reaction, pH was adjusted to 2 ~ 3 by addition of 1N hydrochloric acid, and the organic layer was separated. The aqueous layer was extracted with EtOAc (3x30 mL). The combined organic phases were dried over anhydrous Na<sub>2</sub>SO<sub>4</sub> and concentrated in vacuo. The resulting crude product was purified by column chromatography using PE/EA = 5/1 as the eluent to afford the acid **1ss** (3.2339 g, 13.9 mmol, 60% yield) as a light yellow oil. <sup>1</sup>H NMR (400 MHz, CDCl<sub>3</sub>): δ 10.39 (s, 1H), 7.31-7.23 (m, 2H), 7.21-7.13 (m, 3H), 5.50-5.30 (m, 2H), 2.65 (t, *J* = 7.2 Hz, 2H), 2.41-2.25 (m, 4H), 1.98 (q, *J* = 7.2 Hz, 2H), 1.65-1.51 (m, 2H), 1.42-1.23 (m, 2H). All the spectroscopic data were in agreement with the reported ones.<sup>12</sup>

To a 50 mL flame-dried Schlenk flask charged with acid **1ss** (1.8426 g, 8.0 mmol) and EtOH (15 mL) was added a few drops of concentrated sulfuric acid. The reaction mixture was refluxed for 20 h. After cooling to room temperature, the mixture was concentrated and purified by column chromatography using PE/EA = 20:1 as the eluent to afford alkene **1s** (1.5682 g, 6.0 mmol, 76% yield, *Z/E* ratio: 4.0/1) as a light yellow oil. IR (neat): 2935, 2859, 1736, 1453, 1179 cm<sup>-1</sup>; <sup>1</sup>H NMR (400 MHz, C<sub>6</sub>D<sub>6</sub>): δ 7.22-7.15 (m, 2H), 7.12-7.04 (m, 3H), 5.46-5.25 (m, 2H), 4.02-3.90 (m, 2 H), 2.60-2.49 (m, 2H), 2.32-2.20 (m, 2H), 2.15-2.05 (m, 2H), 1.91-1.84 (m, 2H), 1.60-1.45 (m, 2 H), 1.28-1.21 (m, 0.41H), 1.20-1.10 (m, 1.64H), 1.02-0.92 (m, 3H). HRMS (ESI) calculated for

$[M+H]^+[C_{17}H_{25}O_2]^+$  requires  $m/z$  261.1855, found  $m/z$  261.1854.

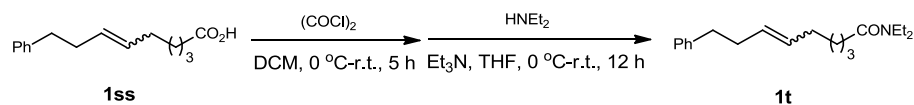

**(*E/Z*)-*N,N*-diethyl-7-phenylhept-4-enamide (1t)**: acid **1ss** (2.32 g, 10.0 mmol) was dissolved in dichloromethane (10 mL) in a 50 mL round bottomed flask and cooled on an ice bath. Oxalyl chloride (1.70 mL, 20.0 mmol) and DMF (5 drops) was added in sequence under stirring, and the reaction was allowed to come to room temperature. After 5 hours the reaction mixture was evaporated to give the crude product without purification and used in the next step.

Under  $N_2$  atmosphere, a 50 mL flame-dried Schlenk flask was charged with chloride and 30 mL THF. To this reaction mixture,  $Et_3N$  (2.8 mL, 0.73 g/mL, 20.0 mmol) and Diethylamine (1.5 mL, 0.71 g/mL, 15 mmol) was added in sequence. Then the mixture was warmed to room temperature and stirred for 12 h. After completion of the reaction, the reaction mixture was quenched with saturated solution of  $NH_4Cl$  (25-30 mL) and the organic layer was separated. The aqueous layer was extracted with EtOAc (3x30 mL). The combined organic phases were dried over anhydrous  $Na_2SO_4$  and concentrated in vacuo. The resulting crude product was purified by column chromatography (silica gel, 200-300 mesh) using PE/EA = 5/1 as the eluent to afford the alkene **1t** (1.7729 g, 62% yield for two steps, *Z/E* ratio: 4.0/1) as a yellow oil. IR (neat): 2932, 2855, 1642, 1455, 1430  $cm^{-1}$ ;  $^1H$  NMR (400 MHz,  $C_6D_6$ ):  $\delta$  7.22-7.16 (m, 2H), 7.12-7.04 (m, 3H), 5.47-5.39 (m, 2H), 3.22 (q,  $J = 7.2$  Hz, 2H), 2.71 (q,  $J = 7.2$  Hz, 2H), 2.59-2.53 (m, 2H), 2.35-2.21 (m, 2H), 2.06-1.93 (m, 4H), 1.79-1.68 (m, 2H), 1.42-1.35 (m, 0.40H), 1.35-1.25 (m, 1.62H), 0.98 (t,  $J = 7.2$  Hz, 3H), 0.70 (t,  $J = 7.2$  Hz, 3H). HRMS (ESI) calculated for  $[M+Na]^+[C_{19}H_{29}NONa]^+$  requires  $m/z$  310.2147, found  $m/z$  310.2156.

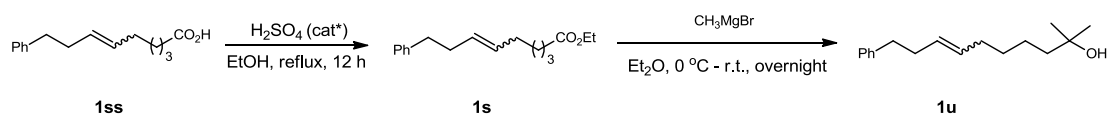

**(*E/Z*)-2-methyl-10-phenyldec-7-en-2-ol (1u)**: To a 50 mL flame-dried Schlenk flask charged with acid **1ss** (1.16 g, 5.0 mmol) and EtOH (10 mL) was added two drops of concentrated sulfuric acid. The reaction mixture was refluxed for 20 h. After cooling to room temperature, the mixture was concentrated and purified by column chromatography using PE/EA = 20:1 as the eluent to afford

ester as a light yellow oil.

Under N<sub>2</sub> atmosphere, a 50 mL flame-dried Schlenk flask was charged with ester and 10 mL Et<sub>2</sub>O. To this reaction mixture, CH<sub>3</sub>MgBr (4.2 mL, 3.0 mol/L) was added slowly at 0 °C. Then the mixture was warmed to room temperature and stirred for 20 h. After completion of the reaction, the reaction mixture was quenched with saturated solution of NH<sub>4</sub>Cl (25-30 mL) and the organic layer was separated. The aqueous layer was extracted with EtOAc (3x20 mL). The combined organic phases were dried over anhydrous Na<sub>2</sub>SO<sub>4</sub> and concentrated in vacuo. The resulting crude product was purified by column chromatography (silica gel, 200-300 mesh) using PE/EA = 10/1 as the eluent to afford the alkene (1.1181 g, 90% yield for two steps, *Z/E* ratio: 4.0/1) as a colorless oil. <sup>1</sup>H NMR (400 MHz, CD<sub>2</sub>Cl<sub>2</sub>) δ 7.32-7.14 (m, 2H), 7.24-7.14 (m, 3H), 5.49-5.44 (m, 0.40H), 5.43-5.36 (m, 1.59H), 2.66 (t, *J* = 7.6 Hz, 2H), 2.42-2.22 (m, 2H), 2.08-1.95 (m, 2H), 1.49-1.24 (m, 7H), 1.18 (s, 6H). All the spectroscopic data were in agreement with the reported ones.<sup>13</sup>

 **9-phenylnon-6-en-1-ol (1v):** To a dry THF (30 mL) suspension of LiAlH<sub>4</sub> (1.25 g, 32.9 mmol), under N<sub>2</sub> atmosphere with ice cooling, acid **1ss** (5.10 g, 22.0 mmol) in THF (30 mL) was added dropwise over 10 minutes. After stirred at room temperature for 21 h, the reaction mixture was quenched with saturated solution of Na<sub>2</sub>SO<sub>4</sub> (10 mL) under ice cooling. The mixture was extracted with EtOAc (3x60 mL) and the organic phases were dried over anhydrous Na<sub>2</sub>SO<sub>4</sub> and concentrated in vacuo. The resulting crude product was purified by column chromatography using PE/EA = 5/1 as the eluent to afford alkene **1v** (4.2942 g, 19.7 mmol, 90% yield, *Z/E* ratio: 3.9/1) as a colorless oil. IR (neat): 3349, 2931, 2856, 1496, 1454 cm<sup>-1</sup>; <sup>1</sup>H NMR (400 MHz, C<sub>3</sub>D<sub>6</sub>O): δ 7.30-7.12 (m, 5H), 5.46-5.32 (m, 2H), 3.56-3.40 (m, 3H), 2.65 (t, *J* = 7.6 Hz, 2H), 2.40-2.32 (m, 1.61H), 2.32-2.25 (m, 0.41H), 2.05-1.96 (m, 2H), 1.55-1.44 (m, 2H), 1.40-1.24 (m, 4H); HRMS (EI) calculated for [C<sub>15</sub>H<sub>22</sub>O]<sup>+</sup> requires *m/z* 218.1671, found *m/z* 218.1675.

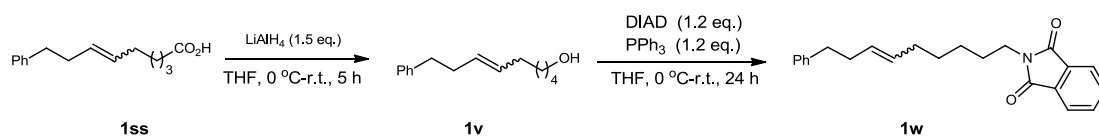

**(*E/Z*)-2-(9-phenylnon-6-en-1-yl)isoindoline-1,3-dione (1w):** To a dry THF (30 mL) suspension of LiAlH<sub>4</sub> (1.42 g, 37.5 mmol), under N<sub>2</sub> atmosphere with ice cooling, acid (5.80 g, 25.0 mmol) in

THF (20 mL) was added dropwise over 10 minutes. After stirred at room temperature for 5 h, the reaction mixture was quenched with saturated solution of Na<sub>2</sub>SO<sub>4</sub> (10 mL) under ice cooling. Then the mixture was filtered and the filtrate was evaporated to give the crude alcohol without purification and used in the next step.

A 50 mL oven-dried round-bottom flask was charged with alcohol **1v** (1.30 g, 6.0 mmol), phthalamide (1.08 g, 7.2 mmol), Ph<sub>3</sub>P (1.88 g, 7.2 mmol) and THF (20 mL). The flask was cooled to 0 °C, and DIAD (1.46 g, 7.2 mmol) was added dropwise. The mixture was allowed to warm to room temperature and was stirred for 24 h. Then the reaction mixture was quenched with saturated NH<sub>4</sub>Cl (aq). The mixture was extracted with EtOAc (2x30 mL) and the organic phases were dried over anhydrous Na<sub>2</sub>SO<sub>4</sub> and concentrated in vacuo. The resulting crude product was purified by column chromatography using PE/EA = 5/1 as the eluent to afford alkene **1w** (1.4980 g, 4.3 mmol, 72% yield, *Z/E* ratio: 4.0/1) as a colorless oil. IR (neat): 2935, 2856, 1772, 1714, 1399, 1365 cm<sup>-1</sup>; <sup>1</sup>H NMR (400 MHz, CD<sub>3</sub>CN): δ 7.84-7.70 (m, 4H), 7.28-7.10 (m, 5H), 5.47-5.29 (m, 2H), 3.58 (t, *J* = 7.2 Hz, 2H), 2.65-2.55 (m, 2H), 2.35-2.26 (m, 1.60H), 2.26-2.19 (m, 0.40H), 2.20-1.88 (m, 2H), 1.66-1.54 (m, 2H), 1.36-1.20 (m, 4H). HRMS (ESI) calculated for [M+Na]<sup>+</sup>[C<sub>23</sub>H<sub>25</sub>NO<sub>2</sub>Na]<sup>+</sup> requires *m/z* 370.1783, found *m/z* 370.1785.

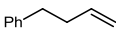 **but-3-en-1-ylbenzene (1x)**: Prepared from phenylpropyl aldehyde according to the general procedure B. 29% yield, colorless oil. <sup>1</sup>H NMR (400 MHz, CDCl<sub>3</sub>): δ 7.31-7.23 (m, 2H), 7.22-7.15 (m, 3H), 5.92-5.80 (m, 1H), 5.09-4.95 (m, 2H), 2.71 (t, *J* = 7.6 Hz, 2H), 2.42-2.33 (m, 2H). All the spectroscopic data were in agreement with the reported ones.<sup>14</sup>

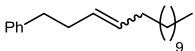 **(E/Z)-hept-3-en-1-ylbenzene (1y)**: Prepared from phenylpropyl aldehyde according to the general procedure A. *Z/E* ratio: 2.8/1, 60% yield, colorless oil. IR (neat): 3017, 2925, 2854, 1496, 1458 cm<sup>-1</sup>; <sup>1</sup>H NMR (400 MHz, CDCl<sub>3</sub>): δ 7.31-7.23 (m, 2H), 7.22-7.14 (m, 3H), 5.46-5.41 (m, 0.53H), 5.41-5.32 (m, 1.47H), 2.71-2.61 (m, 2H), 2.42-2.25 (m, 2H), 2.05-1.93 (m, 2H), 1.38-1.20 (m, 18H), 0.88 (t, *J* = 6.8 Hz, 3H). HRMS (ESI) calculated for [M+H]<sup>+</sup>[C<sub>21</sub>H<sub>35</sub>]<sup>+</sup> requires *m/z* 287.2739, found *m/z* 287.2746.

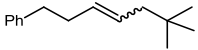
**(E/Z)-(6,6-dimethylhept-3-en-1-yl)benzene (1z):** Prepared from phenylpropyl aldehyde according to the general procedure A. *Z/E* ratio: 6.8/1, 24% yield, colorless oil. IR (neat): 3019, 2952, 2865, 1461, 1364 cm<sup>-1</sup>; <sup>1</sup>H NMR (400 MHz, CDCl<sub>3</sub>): δ 7.32-7.24 (m, 2H), 7.23-7.14 (m, 3H), 5.55-5.40 (m, 2H), 2.72-2.60 (m, 2H), 2.40-2.29 (m, 2H), 1.89 (d, *J* = 6.4 Hz, 1.83 H), 1.85(d, *J* = 6.4 Hz, 0.27H), 0.87 (s, 7.85H), 0.83 (s, 1.22H).HRMS (ESI) calculated for [M+K]<sup>+</sup>[C<sub>15</sub>H<sub>22</sub>K]<sup>+</sup> requires *m/z* 241.1359, found *m/z* 241.1368.

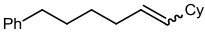
**(E/Z)-(6-cyclohexylhex-5-en-1-yl)benzene (1aa):** Prepared from 5-phenylpentanal according to the general procedure A. *Z/E* ratio: 4.2/1, 57% yield, colorless oil. IR (neat): 3000, 2926, 2852, 1495, 1450 cm<sup>-1</sup>; <sup>1</sup>H NMR (400 MHz, CDCl<sub>3</sub>): δ 7.30-7.22 (m, 1H), 7.20-7.13 (m, 2H), 5.36-5.30 (m, 0.38H), 5.28-5.16 (m, 1.60 H), 2.64-2.56 (m, 2H), 2.30-2.17 (m, 0.81H), 2.10-1.96 (m, 2H), 1.93-1.82 (m, 0.21 H), 1.74-1.53 (m, 7H), 1.44-0.96 (m, 7H).HRMS (ESI) calculated for [M+K]<sup>+</sup>[C<sub>18</sub>H<sub>26</sub>K]<sup>+</sup> requires *m/z* 281.1672, found *m/z* 281.1655.

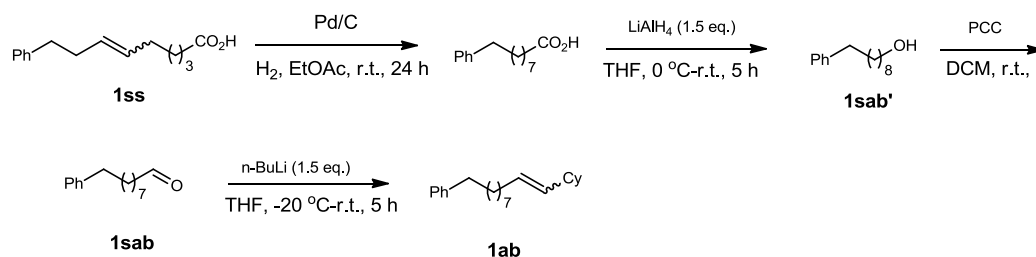

**(E/Z)-(4-cyclohexylbut-3-en-1-yl)benzene (1ab):** The mixture of acid **1ss** (9.2 g) and Pd/C (0.9 g, 10 %) in EtOAc (50 mL) was stirred under atmosphere of hydrogen for 26 h at ambient temperature. The suspension was filtrated and the solid was washed with THF for three times. The combined filtrate was concentrated to give crude product, the crude product in THF (20 mL) was added dropwise over 10 minutes to a dry THF (30 mL) suspension of LiAlH<sub>4</sub> (2.21 g, 58 mmol), under N<sub>2</sub> atmosphere with ice cooling. After stirred at room temperature for 5 h, the reaction mixture was quenched with saturated solution of Na<sub>2</sub>SO<sub>4</sub> (10 mL) under ice cooling. Then the mixture was filtered and the filtrate was evaporated and purified by column chromatography using PE/EA = 10/1 as the eluent to afford the alcohol **1sab'** (8.0787 g, 36.7 mmol, 93% yield for two steps ) as a colorless oil. <sup>1</sup>H NMR (400 MHz, CDCl<sub>3</sub>): δ 7.33-7.26 (m, 2H), 7.23-7.14 (m, 3H), 3.63

(dd,  $J = 7.8, 7.6$  Hz, 2H), 2.65-2.56 (m, 2H), 1.76-1.44 (m, 5H), 1.32 (s, 10H);  $^{13}\text{C}$  NMR: (101 MHz,  $\text{CDCl}_3$ ):  $\delta$  142.8, 128.3, 128.2, 125.5, 63.0, 35.9, 32.7, 31.5, 29.5, 29.38, 29.36, 29.2, 25.7.  $^1\text{H}$  NMR data were in agreement with the reported ones.<sup>15</sup>

1.5 equivalents of PCC was suspended in DCM, and then the mixture was cooled in an ice bath. To the cooled suspension, 1 equivalent of alcohol dissolved in DCM was added dropwise. The reaction mixture was warmed to room temperature and stirred for about 5 h. Then the mixture was filtered over silica gel. The filtrate was concentrated and purified by column chromatography using PE/EA = 30/1 as the eluent to afford the aldehyde **1sab** (3.3903 g, 15.5 mmol, 43% yield) as a colorless oil.  $^1\text{H}$  NMR (400 MHz,  $\text{CDCl}_3$ ): 9.75 (t,  $J = 2.0$  Hz, 1H), 7.32-7.22 (m, 2H), 7.22-7.10 (m, 3H), 2.59 (t,  $J = 7.6$  Hz, 2H), 2.40 (dt,  $J = 7.2, 2.0$  Hz, 2H), 1.68-1.56 (m, 4H), 1.38-1.25 (m, 8H);  $^{13}\text{C}$  NMR: (101 MHz,  $\text{CDCl}_3$ ):  $\delta$  202.9, 142.8, 128.4, 128.2, 125.5, 43.9, 35.9, 31.4, 29.24, 29.18, 29.1, 29.0, 22.0. All the spectroscopic data were in agreement with the reported ones.<sup>16</sup>

The alkene **1ab** was prepared from aldehyde **1sab** according to the general procedure A. *Z/E* ratio: 4.1/1, 71% yield, colorless oil. IR (neat): 2925, 2853, 1496, 1454  $\text{cm}^{-1}$ ;  $^1\text{H}$  NMR (400 MHz,  $\text{CDCl}_3$ ):  $\delta$  7.30-7.21 (m, 2H), 7.20-7.13 (m, 3H), 5.36-5.14 (m, 2H), 2.59 (t,  $J = 7.6$  Hz, 2H), 2.30-2.16 (m, 0.82H), 2.10-1.80 (m, 2.20H), 1.77-1.52 (m, 7H), 1.40-0.96 (m, 15H). HRMS (ESI) calculated for  $[\text{M}+\text{Na}]^+[\text{C}_{22}\text{H}_{34}\text{Na}]^+$  requires  $m/z$  321.2558, found  $m/z$  321.2564.

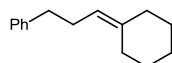

**(3-cyclohexylidenepropyl)benzene (1ac)**: Prepared from cyclohexanone according to the general procedure A. 63% yield, colorless oil.  $^1\text{H}$  NMR (400 MHz,  $\text{CDCl}_3$ ):  $\delta$  7.30-7.24 (m, 2H), 7.21-7.14 (m, 3H), 5.11 (t,  $J = 7.2$  Hz, 1H), 2.63 (t,  $J = 7.6$  Hz, 2H), 2.30 (q,  $J = 7.6$  Hz, 2H), 2.10-2.02 (m, 4H), 1.55-1.45 (m, 4H), 1.43-1.34 (m, 2H). All the spectroscopic data were in agreement with the reported ones.<sup>17</sup>

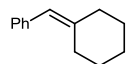

**(cyclohexylidenemethyl)benzene (1ad)**: Prepared from cyclohexanone according to the general procedure A. 99% yield, colorless oil.  $^1\text{H}$  NMR (400 MHz,  $\text{CDCl}_3$ ):  $\delta$  7.36-7.25 (m, 2H), 7.24-7.12 (m, 3H), 6.22 (s, 1H), 2.45-2.32 (m, 2H), 2.31-2.20 (m, 2H), 1.73-1.48 (m, 6H). All the spectroscopic data were in agreement with the reported ones.<sup>18</sup>

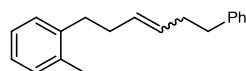

**(E/Z)-1-methyl-2-(6-phenylhex-3-en-1-yl)benzene(1ae):** Prepared from 3-(*o*-tolyl)propanal according to the general procedure A. *Z/E* ratio: 4.2/1,

55% yield, colorless oil. IR (neat): 3020, 2930, 2857, 1494, 1455  $\text{cm}^{-1}$ ;  $^1\text{H}$  NMR (400 MHz,  $\text{C}_6\text{D}_6$ ):  $\delta$  7.20-7.14 (m, 3H), 7.12-7.00 (m, 7H), 5.48-5.35 (m, 2H), 2.58-2.50 (m, 0.77H), 2.48-2.40(m, 3.24H), 2.28-2.14 (m, 4H), 2.11 (s, 0.57H), 2.24 (s, 2.24H). HRMS (ESI) calculated for  $[\text{M}+\text{H}]^+[\text{C}_{19}\text{H}_{23}]^+$  requires  $m/z$  251.1800, found  $m/z$  251.1806.

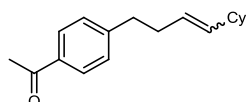

**(E/Z)-1-(4-(4-cyclohexylbut-3-en-1-yl)phenyl)ethanone (s-1af):**

Prepared from 3-(4-acetylphenyl)propanal<sup>19</sup> according to the general procedure A. *Z/E* ratio: 3.9/1, 14% yield, colorless oil. IR (neat): 2923, 2850, 1683, 1607, 1447  $\text{cm}^{-1}$ ;  $^1\text{H}$  NMR (400 MHz,  $\text{C}_6\text{D}_6$ )  $\delta$  7.80-7.76 (m, 2H), 6.97 (d,  $J = 8.4$  Hz, 2H), 5.39-5.20 (m, 2H), 2.54-2.45 (m, 2H), 2.32-2.10 (m, 5.81H), 1.94-1.82 (m, 0.21H), 1.74-1.48 (m, 5H), 1.27-0.94 (m, 5H). HRMS (EI) calculated for  $[\text{C}_{18}\text{H}_{24}\text{O}]^+$  requires  $m/z$  256.1827, found  $m/z$  256.1827.

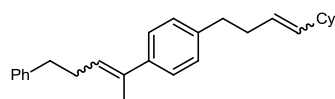

**1-((E/Z)-4-cyclohexylbut-3-en-1-yl)-4-((E/Z)-5-phenylpent-2-en-2-yl)benzene (1af):** Prepared from **s-1af** according to the

general procedure A. 66% yield, colorless oil. IR (neat): 2922, 2850, 1604, 1448  $\text{cm}^{-1}$ .  $^1\text{H}$  NMR (400 MHz,  $\text{CDCl}_3$ ):  $\delta$  7.31-6.99 (m, 9H), 5.83-5.73 (m, 0.19H), 5.52-5.48 (m, 0.81H), 5.42-5.18 (m, 2H), 2.75 (t,  $J = 7.6$  Hz, 0.43H), 2.63 (t,  $J = 7.6$  Hz, 3.64H), 2.57-2.46 (m, 0.43H), 2.40-2.26 (m, 3.60H), 2.22-2.11 (m, 0.83H), 2.00 (s, 2.45H), 1.94 (s, 0.57H), 1.89-1.82 (m, 0.20H), 1.74-1.55 (m, 3.45H), 1.49-1.42 (m, 1.59H), 1.30-0.86 (m, 5.0H). HRMS (EI) calculated for  $[\text{C}_{27}\text{H}_{34}]^+$  requires  $m/z$  358.2661, found  $m/z$  358.2658.

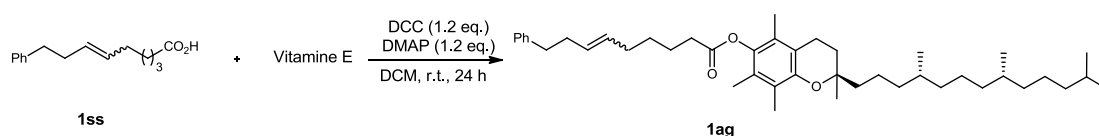

**(E/Z)-(R)-2,5,7,8-tetramethyl-2-((4R,8R)-4,8,12-trimethyltridecyl)chroman-6-yl-9-phenylnon**

**-6-enoate (1ag):** Under  $\text{N}_2$  atmosphere, a 50 mL flame-dried Schlenk flask was charged with acid (4.5 mmol, 1.0456 g), Vitamin E (4.5 mmol, 1.9489 g) and 20 mL DCM. Then DCC (5.4 mmol, 1.1149g) and DMAP (5.4 mmol, 0.6688 g) were added. The mixture was stirred at room

temperature for 24 h. After completion of the reaction, the reaction mixture was filtered and the organic phases were concentrated in vacuo. The resulting crude product was purified by column chromatography (silica gel, 200-300 mesh) using PE/EA = 40/1 as the eluent to afford the alkene (1.8383 g, 63% yield, *Z/E* ratio: 3.6/1) as a colorless oil. IR (neat): 2932, 2861, 1755, 1458, 1374, 1136  $\text{cm}^{-1}$ ; Optical Rotation:  $[\alpha]_{\text{D}}^{20} = +2.4$  (*c* 1.55,  $\text{CHCl}_3$ );  $^1\text{H}$  NMR (400 MHz,  $\text{CD}_2\text{Cl}_2$ ):  $\delta$  7.21-7.14 (m, 2H), 7.13-7.04 (m, 3H), 5.42-5.27 (m, 2H), 2.58 (t, *J* = 7.6 Hz, 2H), 2.53-2.44 (m, 4H), 2.32-2.25 (m, 1.63H), 2.25-2.15 (m, 0.45H), 2.02-1.93 (m, 5H), 1.89 (s, 3H), 1.85 (s, 3H), 1.77-1.60 (m, 4H), 1.50-0.97 (m, 26H), 0.80-0.74 (m, 12H). HRMS (ESI) calculated for  $[\text{M}+\text{Na}]^+[\text{C}_{44}\text{H}_{68}\text{O}_3\text{Na}]^+$  requires *m/z* 667.5066, found *m/z* 667.5056.

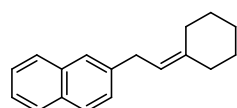

**2-(2-cyclohexylideneethyl)naphthalene (1ah):** Prepared from cyclohexanone according to the general procedure A. 88% yield, colorless

oil. IR (neat): 2926, 2852, 1508, 1446  $\text{cm}^{-1}$ ;  $^1\text{H}$  NMR (400 MHz,  $\text{CDCl}_3$ ):  $\delta$  7.82-7.73 (m, 3H), 7.61 (s, 1H), 7.47-7.37 (m, 2H), 7.32 (dd, *J* = 8.8, 1.2 Hz, 1H), 5.34 (t, *J* = 7.6 Hz, 1H), 3.51 (d, *J* = 7.6 Hz, 2H), 2.33-2.26 (m, 2H), 2.18-2.12 (m, 2H), 1.64-1.54 (m, 6H).  $^{13}\text{C}$  NMR: (101 MHz,  $\text{CDCl}_3$ ):  $\delta$  140.9, 139.5, 133.6, 131.9, 127.8, 127.6, 127.4, 126.1, 125.8, 125.0, 119.6, 37.2, 33.5, 28.8, 28.6, 27.9, 26.9. HRMS (ESI) calculated for  $[\text{M}+\text{H}]^+[\text{C}_{18}\text{H}_{21}]^+$  requires *m/z* 237.1643, found *m/z* 237.1646.

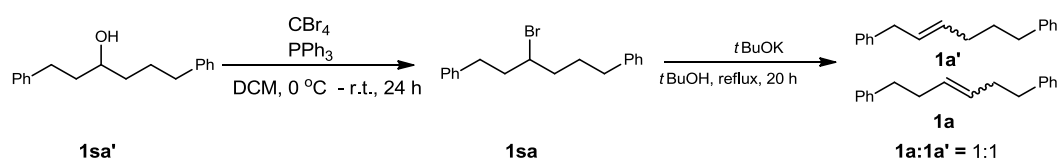

A 250 mL oven-dried three-neck flask was charged with 1,6-diphenylhexan-3-ol<sup>20</sup> (11.67g, 45.9 mmol), tetrabromomethane (18.49 g, 55.8 mmol), DCM (100 mL). Then, the flask was cooled to 0 °C, and triphenylphosphine (14.62 g, 55.7 mmol) was added portionwise. The mixture was allowed to warm to room temperature and was stirred for 24 h. The resulting solution was concentrated and purified by flash column chromatography using PE as the eluent to afford **1sa'** (3.85 g, 12.1 mmol, 26% yield) as a colorless oil.  $^1\text{H}$  NMR (400 MHz,  $\text{CDCl}_3$ ):  $\delta$  7.32-7.23 (m, 4H), 7.21-7.11 (m, 6H), 4.07-3.85 (m, 1H), 2.92-2.82 (m, 1H), 2.77-2.68 (m, 1H), 2.65-2.54 (m, 2H), 2.15-2.00 (m, 2H), 1.96-1.79 (m, 3H), 1.78-1.68 (m, 1H);  $^{13}\text{C}$  NMR (101 MHz,  $\text{CDCl}_3$ ):  $\delta$  141.8,



140.9, 128.5, 128.4, 128.34, 128.33, 126.0, 125.8, 57.3, 40.7, 38.6, 35.1, 33.7, 29.2.

To a 50 mL flame-dried Schlenk flask charged with bromide **1sa'** (1.8993 g, 6.0 mmol) and *t*BuOH (10 mL) was added *t*BuOK (1.13 g, 10.0 mmol). The reaction mixture was refluxed for 20 h. After cooling to room temperature, the mixture was concentrated and purified by column chromatography using PE as the eluent to afford alkene (**1a/1a'** = 1/1) (0.7733 g, 3.3 mmol, 55% yield) as a colorless oil. <sup>1</sup>H NMR (400 MHz, CDCl<sub>3</sub>): δ 7.32-7.23 (m, 4H), 7.21-7.12 (m, 6H), 5.64-5.39 (m, 2H), 3.44-3.26 (m, 1H), 2.71-2.52 (m, 3H), 2.36-2.26 (m, 2H), 2.24-2.02 (m, 1H), 1.79-1.65 (m, 1H).

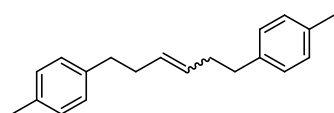

**(E/Z)-1,6-di-p-tolylhex-3-ene (1ai):** Prepared from 3-(p-tolyl)propanal according to the general procedure A. *Z/E* ratio:

4.7/1, 43% yield, colorless oil. IR (neat): 3005, 2921, 2857, 1515, 1451 cm<sup>-1</sup>; <sup>1</sup>H NMR (400 MHz, CDCl<sub>3</sub>): δ 7.15-6.95 (m, 8H), 5.52-5.46 (m, 0.35H), 5.45-5.34 (m, 1.65H), 2.61 (dd, *J* = 8.4, 7.2 Hz, 0.7H), 2.54 (dd, *J* = 8.0, 7.6 Hz, 3.3H), 2.31 (s, 6H), 2.30-2.24 (m, 4H). HRMS (ESI) calculated for [M+H]<sup>+</sup>[C<sub>20</sub>H<sub>25</sub>]<sup>+</sup> requires *m/z* 265.1956, found *m/z* 265.1960.

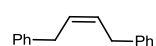

**(Z)-1,4-diphenylbut-2-ene ((Z)-1aj):** Prepared according to the literature.<sup>21</sup> 72%

yield, colorless oil. <sup>1</sup>H NMR (400 MHz, CDCl<sub>3</sub>) δ 7.34-7.26 (m, 4H), 7.26-7.16 (m, 6H), 5.78-5.66 (m, 2H), 3.52 (d, *J* = 5.2 Hz, 4H). All the spectroscopic data were in agreement with the reported ones.<sup>21</sup>

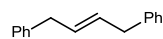

**(E)-1,4-diphenylbut-2-ene ((E)-1aj):** Prepared according to the literature.<sup>21</sup> 46%

yield (a mixture of alkene and alkane, *n*<sub>alkene</sub>/*n*<sub>alkane</sub> = 2.8/1), *E/Z* ratio: 13/1, colorless oil. <sup>1</sup>H NMR (400 MHz, CDCl<sub>3</sub>) δ 7.32-7.15 (m, 13.4H), 5.70-5.65 (m, 2H), 3.52 (d, *J* = 4.8 Hz, 0.28H), 3.37 (d, *J* = 3.2 Hz, 3.72H). All the spectroscopic data were in agreement with the reported ones.<sup>21</sup>

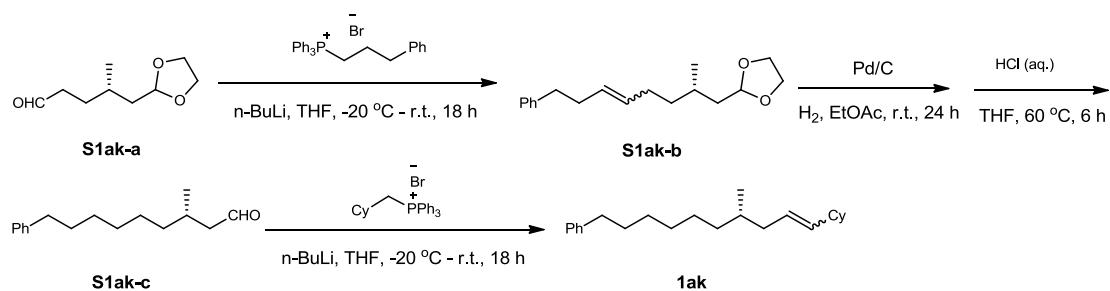

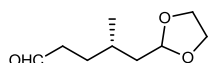

**(S)-5-(1,3-dioxolan-2-yl)-4-methylpentanal (S1ak-a):** Prepared from (-)-Citronellal according to the Literature.<sup>22</sup> 69% yield, colorless oil. IR (neat): 2926, 2722, 1724, 1411, 1139  $\text{cm}^{-1}$ ;  $[\alpha]_{\text{D}}^{20} = -4.6$  (c 1.06,  $\text{CHCl}_3$ );  $^1\text{H}$  NMR (400 MHz,  $\text{CDCl}_3$ ):  $\delta$  9.78 (d,  $J = 1.2$ , 1H), 4.90 (t,  $J = 4.4$  Hz, 1H), 4.02-3.91 (m, 2H), 3.89-3.80 (m, 2H), 2.55-2.30 (m, 2H), 1.79-1.62 (m, 3H), 1.59-1.47 (m, 2H), 0.97 (d,  $J = 5.6$  Hz, 3H);  $^{13}\text{C}$  NMR (101 MHz,  $\text{CDCl}_3$ ):  $\delta$  202.6, 103.4, 64.7, 64.6, 41.5, 40.5, 29.0, 28.9, 19.7. HRMS (EI) calculated for  $[\text{C}_9\text{H}_{16}\text{O}_3]^+$  requires  $m/z$  172.1099, found  $m/z$  172.1097.

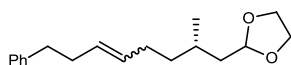

**(S)-2-(2-methyl-8-phenyloct-5-en-1-yl)-1,3-dioxolane (S1ak-b):** Prepared from **S1ak-a** according to the general procedure A. *Z/E* ratio: 5.1/1, 80% yield, colorless oil. IR (neat): 2923, 1603, 1495, 1454, 1132  $\text{cm}^{-1}$ ;  $[\alpha]_{\text{D}}^{20} = +1.6$  (c 0.43,  $\text{CHCl}_3$ );  $^1\text{H}$  NMR (400 MHz,  $\text{CDCl}_3$ ):  $\delta$  7.31-7.24 (m, 2H), 7.23-7.10 (m, 3H), 5.52-5.30 (m, 2H), 4.95-4.81 (m, 1H), 4.02-3.90 (m, 2H), 3.89-3.75 (m, 2H), 2.66 (t,  $J = 7.6$  Hz, 2H), 2.43-2.31 (m, 1.67H), 2.31-2.24 (m, 0.33H), 2.10-1.91 (m, 2H), 1.72-1.61 (m, 2H), 1.53-1.44 (m, 1H), 1.42-1.29 (m, 1H), 1.24-1.10 (m, 1H), 1.00-0.89 (m, 3H). HRMS (EI) calculated for  $[\text{C}_{18}\text{H}_{26}\text{O}_2]^+$  requires  $m/z$  274.1933, found  $m/z$  274.1936.

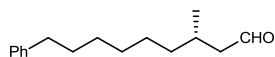

**(S)-3-methyl-9-phenylnonanal (S1ak-c):** To a stirred solution of **S1ak-b** (4.1713 g, 15.2 mmol) in EtOAc (40 mL) were added Pd/C (5%) (0.8241g, 20% wt/Pd) at room temperature. The resulting mixture was stirred at 25 °C for 24 h with  $\text{H}_2$  balloon. Then, the resulting solution was filtered through a short pad of silica gel, washed by EtOAc (2×30 mL). The combined filtrates were concentrated under reduced pressure to give the crude hydrogenation product as a colorless oil, which was used for the next step without further purification. To a 250 mL flame-dried Schlenk flask charged with the crude hydrogenation product and THF (75 mL) was added 1 N HCl (a) (75 mL) at 25 °C. After stirring at 60 °C for 6 hours, the reaction mixture was cooled to room temperature and the solvent was removed under reduced pressure. EtOAc (80 mL) was added to the residue, and the solution was neutralized to pH = 7 with saturated  $\text{Na}_2\text{CO}_3$  solution. The organic phase was separated and the aqueous phase was extracted with EtOAc (60 mL × 2). The combined organic phases were washed with saturated  $\text{Na}_2\text{CO}_3$  solution (60 mL), brine (60 mL). The organic phases were dried over anhydrous  $\text{Na}_2\text{SO}_4$

and concentrated in vacuo. The resulting crude product was purified by column chromatography (silica gel, 200-300 mesh) using PE/EA = 100/1 as the eluent to afford **S1ak-c** (3.0117 g, 86% yield for two steps) as a colorless oil. IR (neat): 2926, 2855, 1707, 1458  $\text{cm}^{-1}$ ;  $[\alpha]_{\text{D}}^{20} = -6.9$  (c 1.12,  $\text{CHCl}_3$ );  $^1\text{H}$  NMR (400 MHz,  $\text{CDCl}_3$ ):  $\delta$  9.74 (t,  $J = 2.0$  Hz, 1H), 7.30-7.23 (m, 2H), 7.23-7.12 (m, 3H), 2.64-2.56 (t,  $J = 7.2$  Hz, 2H), 2.38 (ddd,  $J = 16.0, 5.6, 1.6$  Hz, 1H), 2.21 (ddd,  $J = 16.0, 8.0, 2.8$  Hz, 1H), 2.10-1.95 (m, 1H), 1.67-1.54 (m, 2H), 1.41-1.18 (m, 8H), 0.95 (dd,  $J = 6.8, 1.6$  Hz, 3H);  $^{13}\text{C}$  NMR (101 MHz,  $\text{CDCl}_3$ ):  $\delta$  203.0, 142.8, 128.4, 128.2, 125.6, 51.1, 36.9, 35.9, 31.4, 29.5, 29.2, 28.2, 26.8, 19.9. HRMS (EI) calculated for  $[\text{C}_{16}\text{H}_{24}\text{O}]^+$  requires  $m/z$  232.1827, found  $m/z$  232.1826.

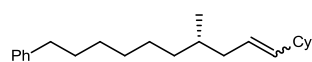

**(S)-(10-cyclohexyl-7-methyldec-9-en-1-yl)benzene (1ak):**

Prepared from **S1ak-c** according to the general procedure A. *Z/E* ratio: 4.9/1, 83% yield, colorless oil. IR (neat): 2924, 2852, 1495, 1453, 1376  $\text{cm}^{-1}$ ;  $[\alpha]_{\text{D}}^{20} = +4.0$  (c 1.22,  $\text{CHCl}_3$ ), 92% ee determined by HPLC, HPLC conditions: Chiralcel OJ-H\*2, *n*-hexane/*i*-PrOH = 100/0, 0.5 mL/min,  $n = 220$  nm,  $t_r$  19.2 (major), 20.1 (minor).  $^1\text{H}$  NMR (400 MHz,  $\text{CDCl}_3$ ):  $\delta$  7.33-7.23 (m, 2H), 7.22-7.10 (m, 3H), 5.40-5.30 (m, 0.34H), 5.30-5.13 (m, 1.66H), 2.66-2.55 (m, 2H), 2.30-2.16 (m, 0.83H), 2.07-1.76 (m, 2.21H), 1.74-1.55 (m, 7H), 1.48-0.98 (m, 14H), 0.90-0.82 (m, 3H). HRMS (EI) calculated for  $[\text{C}_{23}\text{H}_{36}]^+$  requires  $m/z$  312.2817, found  $m/z$  312.2816.

**General Procedures for Isomerization–Hydroboration of Alkenes:** To a 25 mL flame-dried Schlenk flask cooled under nitrogen,  $\text{Co}(\text{OAc})_2$  (0.025 mmol), **L** (0.03 mmol),  $\text{Et}_2\text{O}$  (1 mL) were added. The mixture was stirred at room temperature for 5 min. Then, alkene (1.0 mmol), HBpin (180  $\mu\text{L}$ , 1.2 mmol) were added in sequence and stirred at room temperature for 20 h. The resulting solution was filtered by a short pad of silica gel and washed by ether (10 mL  $\times$  2). The combined filtrate was concentrated and purified by flash column chromatography using PE/EtOAc = 20/1 as the eluent to give the corresponding product.

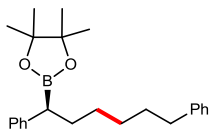

**(S)-2-(1,6-diphenylhexyl)-4,4,5,5-tetramethyl-1,3,2-dioxaborolane (2a):**

Prepared according to the general procedure using  $\text{Co}(\text{OAc})_2$  (0.0045 g, 0.025 mmol), **L8** (0.0126 g, 0.031 mmol),  $\text{Et}_2\text{O}$  (1 mL), **1a** (0.2358 g, 1.0 mmol) and HBpin (180  $\mu\text{L}$ , 1.2 mmol). After 20 h, the resulting solution was added 20 mL of ether and filtered through a pad of silica gel, washed by ether (10 mL  $\times$  2). The combined filtrates were concentrated and purified by flash column chromatography using PE/EtOAc = 20/1 as the eluent to afford **2a** (0.3259 g, 0.89 mmol, 90% yield) as a colorless oil. IR (neat): 2979, 2929, 2857, 1458, 1368, 1324, 1145  $\text{cm}^{-1}$ ; Optical Rotation:  $[\alpha]_{\text{D}}^{20} = +16.1$  (c 1.15,  $\text{CHCl}_3$ ), 98% ee determined by HPLC after oxidized to the corresponding alcohol, HPLC conditions: Chiralcel AD-H, *n*-hexane/*i*-PrOH = 98/2, 1.0 mL/min,  $n = 220$  nm, tr 20.2 (major), 22.1 (minor).  $^1\text{H}$  NMR (400 MHz,  $\text{CDCl}_3$ ):  $\delta$  7.28-7.08 (m, 10H), 2.56 (t,  $J = 7.6$  Hz, 2H), 2.28 (t,  $J = 7.6$  Hz, 1H), 1.89-1.78 (m, 1H), 1.70-1.53 (m, 3H), 1.39-1.24 (m, 4H), 1.19 (s, 6H), 1.17 (s, 6H);  $^{13}\text{C}$  NMR (101 MHz,  $\text{CDCl}_3$ ):  $\delta$  143.4, 142.8, 128.4, 128.3, 128.19, 128.16, 125.5, 125.1, 83.2, 35.9, 32.5, 31.3, 29.2, 29.1, 24.60, 24.55. HRMS (EI) calculated for  $[\text{C}_{24}\text{H}_{33}\text{BO}_2]^+$  requires  $m/z$  364.2574, found  $m/z$  364.2574.

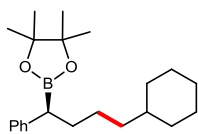

**(S)-2-(4-cyclohexyl-1-phenylbutyl)-4,4,5,5-tetramethyl-1,3,2-dioxaborolane (2b):**

Prepared according to the general procedure using  $\text{Co}(\text{OAc})_2$  (0.0045 g, 0.025 mmol), **L8** (0.0126 g, 0.031 mmol),  $\text{Et}_2\text{O}$  (1 mL), **1b** (0.2120 g, 0.99 mmol) and HBpin (180  $\mu\text{L}$ , 1.2 mmol). After 20 h, the resulting solution was added 20 mL of ether and filtered through a pad of silica gel, washed by ether (10 mL  $\times$  2). The combined filtrates were concentrated and purified by flash column chromatography using PE/EtOAc = 20/1 as the eluent to afford **2b** (0.2873 g, 0.84 mmol, 85% yield) as a colorless oil. IR (neat): 2978, 2925, 2853, 1454, 1368, 1324, 1145  $\text{cm}^{-1}$ ; Optical Rotation:  $[\alpha]_{\text{D}}^{20} = +19.0$  (c 0.92,  $\text{CHCl}_3$ ), 96% ee determined by HPLC after oxidized to the corresponding alcohol, HPLC conditions: Chiralcel AS-H, *n*-hexane/*i*-PrOH = 98/2, 1.0 mL/min,  $n = 220$  nm, tr 7.7 (minor), 8.9 (major).  $^1\text{H}$  NMR (400 MHz,  $\text{CDCl}_3$ ):  $\delta$  7.27-7.18 (m, 4H), 7.12 (t,  $J = 7.2$  Hz, 1H), 2.29 (t,  $J = 8.0$  Hz, 1H), 1.87-1.75 (m, 1H), 1.70-1.56 (m, 6H), 1.31-1.08 (m, 20H), 0.90-0.75 (m, 2H);  $^{13}\text{C}$  NMR (101 MHz,  $\text{CDCl}_3$ ):  $\delta$  143.5, 128.3, 128.2, 125.0, 83.2, 37.47, 37.45, 33.43, 33.35, 32.9, 26.7, 26.5, 26.4, 24.63, 24.56. HRMS (EI) calculated for  $[\text{C}_{22}\text{H}_{35}\text{BO}_2]^+$  requires  $m/z$  342.2730, found  $m/z$  342.2726.

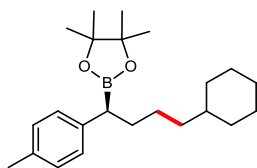

**(S)-2-(4-cyclohexyl-1-(*p*-tolyl)butyl)-4,4,5,5-tetramethyl-1,3,2-dioxab**

**orolane (2c):** Prepared according to the general procedure using Co(OAc)<sub>2</sub> (0.0045 g, 0.025 mmol), **L8** (0.0126 g, 0.031 mmol), Et<sub>2</sub>O (1 mL), **1c** (0.2288 g, 1.0 mmol) and HBpin (180 μL, 1.2 mmol). After 20 h,

the resulting solution was added 20 mL of ether and filtered through a pad of silica gel, washed by ether (10 mL × 2). The combined filtrates were concentrated and purified by flash column chromatography using PE/EtOAc = 20/1 as the eluent to afford **2c** (0.2869 g, 0.80 mmol, 80% yield) as a colorless oil. IR (neat): 2979, 2924, 2852, 1453, 1366, 1323, 1145 cm<sup>-1</sup>; Optical Rotation:  $[\alpha]_D^{20} = +20.8$  (c 1.18, CHCl<sub>3</sub>); 99% ee determined by HPLC after oxidized to the corresponding alcohol, HPLC conditions: Chiralcel AS-H, *n*-hexane/*i*-PrOH = 98/2, 1.0 mL/min, *n* = 220 nm, tr 7.9 (minor), 10.1 (major). <sup>1</sup>H NMR (400 MHz, CDCl<sub>3</sub>): δ 7.11-7.02 (m, 4H), 2.29 (s, 3H), 2.25 (t, *J* = 7.6 Hz, 1H), 1.84-1.72 (m, 1H), 1.69-1.57 (m, 6H), 1.31-1.08 (m, 20H), 0.88-0.76 (m, 2H); <sup>13</sup>C NMR (101 MHz, CDCl<sub>3</sub>): δ 140.4, 134.3, 128.9, 128.2, 83.1, 37.5, 33.44, 33.35, 33.1, 26.7, 26.5, 26.4, 24.64, 24.58, 21.0. HRMS (ESI) calculated for [M+Na]<sup>+</sup>[C<sub>23</sub>H<sub>37</sub>BO<sub>2</sub>Na]<sup>+</sup> requires *m/z* 379.2784, found *m/z* 379.2786.

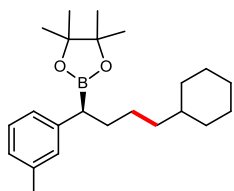

**(S)-2-(4-cyclohexyl-1-(*m*-tolyl)butyl)-4,4,5,5-tetramethyl-1,3,2-dioxabor**

**olane (2d):** Prepared according to the general procedure using Co(OAc)<sub>2</sub> (0.0044 g, 0.025 mmol), **L8** (0.0126 g, 0.031 mmol), Et<sub>2</sub>O (1 mL), **1d** (0.2288 g, 1.0 mmol) and HBpin (180 μL, 1.2 mmol). After 20 h, the

resulting solution was added 20 mL of ether and filtered through a pad of silica gel, washed by ether (10 mL × 2). The combined filtrates were concentrated and purified by flash column chromatography using PE/EtOAc = 20/1 as the eluent to afford **2d** (0.2784 g, 0.78 mmol, 78% yield) as a colorless oil. IR (neat): 2979, 2924, 2854, 1453, 1366, 1323, 1146 cm<sup>-1</sup>; Optical Rotation:  $[\alpha]_D^{20} = +18.2$  (c 0.90, CHCl<sub>3</sub>); 98% ee determined by HPLC after oxidized to the corresponding alcohol, HPLC conditions: Chiralcel AS-H, *n*-hexane/*i*-PrOH = 98/2, 1.0 mL/min, *n* = 220 nm, tr 7.2 (minor), 7.8 (major). <sup>1</sup>H NMR (400 MHz, CDCl<sub>3</sub>): δ 7.13 (t, *J* = 7.6 Hz, 1H), 7.03-6.98 (m, 2H), 6.93 (d, *J* = 7.2 Hz, 1H), 2.30 (s, 3H), 2.25 (t, *J* = 8.0 Hz, 1H), 1.85-1.74 (m, 1H), 1.71-1.55 (m, 6H), 1.32-1.08 (m, 20H), 0.90-0.74 (m, 2H); <sup>13</sup>C NMR (101 MHz, CDCl<sub>3</sub>): δ 143.4, 137.6, 129.2, 128.0, 125.8, 125.3, 83.2, 37.5, 37.4, 33.4, 33.3, 33.0, 26.7, 26.6, 26.4, 24.61,

24.56, 21.4. HRMS (ESI) calculated for  $[M+H]^+[C_{23}H_{38}BO_2]^+$  requires  $m/z$  357.2965, found  $m/z$  357.2959.

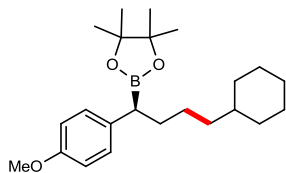

**(S)-2-(4-cyclohexyl-1-(4-methoxyphenyl)butyl)-4,4,5,5-tetramethyl-1,3,2-dioxaborolane (2e):** Prepared according to the general procedure using  $Co(OAc)_2$  (0.0044 g, 0.025 mmol), **L8** (0.0126 g, 0.031 mmol),  $Et_2O$  (1 mL), **1e** (0.2448 g, 1.0 mmol) and HBpin (180  $\mu$ L, 1.2 mmol). After 20 h, the resulting solution was added 20 mL of ether and filtered through a pad of silica gel, washed by ether (10 mL  $\times$  2). The combined filtrates were concentrated and purified by flash column chromatography using PE/EtOAc = 20/1 and PE/EtOAc = 10/1 as the eluent to afford **2e** (0.2608 g, 0.70 mmol, 70% yield) as a colorless oil. IR (neat): 2924, 2853, 1511, 1455, 1367, 1323, 1247, 1145  $cm^{-1}$ ; Optical Rotation:  $[\alpha]_D^{20} = +26.8$  (c 0.76,  $CHCl_3$ ); 98% ee determined by HPLC after oxidized to the corresponding alcohol, HPLC conditions: Chiralcel OD-H, *n*-hexane/*i*-PrOH = 98/2, 1.0 mL/min,  $n = 220$  nm, tr 15.8 (minor), 16.8 (major).  $^1H$  NMR (400 MHz,  $CDCl_3$ ):  $\delta$  7.14-7.09 (m, 2H), 6.82-6.76 (m, 2H), 3.77 (s, 3H), 2.23 (t,  $J = 8.0$  Hz, 1H), 1.82-1.71 (m, 1H), 1.67-1.51 (m, 6H), 1.30-1.10 (m, 20H), 0.88-0.75 (m, 2H);  $^{13}C$  NMR (101 MHz,  $CDCl_3$ ):  $\delta$  157.2, 135.5, 129.1, 113.6, 83.1, 55.1, 37.5, 37.4, 33.4, 33.34, 33.13, 31.2, 26.7, 26.43, 26.40, 24.63, 24.56. HRMS (ESI) calculated for  $[M+H]^+[C_{23}H_{38}BO_3]^+$  requires  $m/z$  373.2914, found  $m/z$  373.2912.

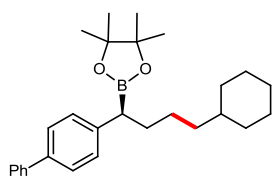

**(S)-2-(1-([1,1'-biphenyl]-4-yl)-4-cyclohexylbutyl)-4,4,5,5-tetramethyl-1,3,2-dioxaborolane (2f):** Prepared according to the general procedure using  $Co(OAc)_2$  (0.0047 g, 0.027 mmol), **L8** (0.0126 g, 0.031 mmol),  $Et_2O$  (1 mL), **1f** (0.2925 g, 1.0 mmol) and HBpin (180  $\mu$ L, 1.2 mmol). After 20 h, the resulting solution was added 20 mL of ether and filtered through a pad of silica gel, washed by ether (10 mL  $\times$  2). The combined filtrates were concentrated and purified by flash column chromatography using PE/EtOAc = 100/1 as the eluent to afford **2f** (0.3423 g, 0.82 mmol, 81% yield) as a white solid. IR (neat): 2922, 2851, 1486, 1448, 1361, 1322, 1143  $cm^{-1}$ ; Optical Rotation:  $[\alpha]_D^{20} = +23.7$  (c 1.15,  $CHCl_3$ ), 99% ee determined by HPLC after oxidized to the corresponding alcohol, HPLC conditions: Chiralcel AS-H, *n*-hexane/*i*-PrOH = 98/2, 1.0

mL/min,  $n = 220$  nm, tr 11.8 (minor), 13.2 (major).  $^1\text{H}$  NMR (400 MHz,  $\text{CDCl}_3$ ):  $\delta$  7.63-7.54 (m, 2H), 7.53-7.45 (m, 2H), 7.41 (t,  $J = 7.6$  Hz, 2H), 7.34-7.23 (m, 3H), 2.35 (t,  $J = 7.6$  Hz, 1H), 1.90-1.79 (m, 1H), 1.72-1.57 (m, 6H), 1.34-1.10 (m, 20H), 0.91-0.76 (m, 2H);  $^{13}\text{C}$  NMR (101 MHz,  $\text{CDCl}_3$ ):  $\delta$  142.7, 141.2, 137.8, 128.7, 128.6, 126.90, 126.86, 126.8, 83.2, 37.5, 33.4, 33.3, 32.9, 26.7, 26.5, 26.4, 24.64, 24.57. HRMS (ESI) calculated for  $[\text{M}+\text{H}]^+[\text{C}_{28}\text{H}_{40}\text{BO}_2]^+$  requires  $m/z$  419.3121, found  $m/z$  419.3129.

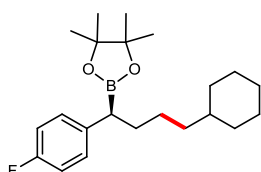

**(S)-2-(4-cyclohexyl-1-(4-fluorophenyl)butyl)-4,4,5,5-tetramethyl-1,3-dioxaborolane (2g):** Prepared according to the general procedure using  $\text{Co}(\text{OAc})_2$  (0.0043 g, 0.024 mmol), **L8** (0.0127 g, 0.031 mmol),  $\text{Et}_2\text{O}$  (1 mL), **1g** (0.2332 g, 1.0 mmol) and HBpin (180  $\mu\text{L}$ , 1.2 mmol).

After 20 h, the resulting solution was added 20 mL of ether and filtered through a pad of silica gel, washed by ether (10 mL  $\times$  2). The combined filtrates were concentrated and purified by flash column chromatography using PE/EtOAc = 20/1 as the eluent to afford **2g** (0.3024 g, 0.84 mmol, 84% yield) as a colorless oil. IR (neat): 2978, 2924, 2852, 1509, 1451, 1367, 1326, 1225, 1146  $\text{cm}^{-1}$ ; Optical Rotation:  $[\alpha]_{\text{D}}^{20} = +18.4$  (c 1.20,  $\text{CHCl}_3$ ), 98% ee determined by HPLC after oxidized to the corresponding alcohol, HPLC conditions: Chiralcel AS-H, *n*-hexane/*i*-PrOH = 98/2, 1.0 mL/min,  $n = 220$  nm, tr 8.1 (minor), 8.8 (major).  $^1\text{H}$  NMR (400 MHz,  $\text{CDCl}_3$ ):  $\delta$  7.18-7.11 (m, 2H), 6.96-6.89 (m, 2H), 2.27 (t,  $J = 7.6$  Hz, 1H), 1.83-1.72 (m, 1H), 1.70-1.53 (m, 6H), 1.29-1.08 (m, 20H), 0.88-0.75 (m, 2H);  $^{13}\text{C}$  NMR (101 MHz,  $\text{CDCl}_3$ ):  $\delta$  160.9 (d,  $J = 243.0$  Hz, 1C), 139.0 (d,  $J = 2.9$  Hz, 1C), 129.5 (d,  $J = 7.4$  Hz, 1C), 114.9 (d,  $J = 20.6$  Hz, 1C), 83.3, 37.5, 37.4, 33.4, 33.3, 33.0, 26.7, 26.4, 24.62, 24.55;  $^{19}\text{F}$  NMR (376 MHz,  $\text{CDCl}_3$ ):  $\delta$  -119.0. HRMS (ESI) calculated for  $[\text{M}+\text{H}]^+[\text{C}_{22}\text{H}_{35}\text{BFO}_2]^+$  requires  $m/z$  361.2714, found  $m/z$  361.2697.

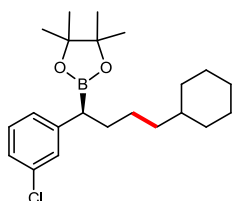

**(S)-2-(1-(3-chlorophenyl)-4-cyclohexylbutyl)-4,4,5,5-tetramethyl-1,3-dioxaborolane (2h):** Prepared according to the general procedure using  $\text{Co}(\text{OAc})_2$  (0.0045 g, 0.025 mmol), **L8** (0.0124 g, 0.030 mmol),  $\text{Et}_2\text{O}$  (1 mL), **1h** (0.2490 g, 1.0 mmol) and HBpin (180  $\mu\text{L}$ , 1.2 mmol). After 20 h,

the resulting solution was added 20 mL of ether and filtered through a pad of silica gel, washed by ether (10 mL  $\times$  2). The combined filtrates were concentrated and purified by flash column

chromatography using PE/EtOAc = 20/1 as the eluent to afford **2h** (0.2712 g, 0.72 mmol, 72% yield) as a colorless oil. IR (neat): 2976, 2925, 2853, 1464, 1367, 1328, 1145  $\text{cm}^{-1}$ ; Optical Rotation:  $[\alpha]_{\text{D}}^{20} = +12.0$  (c 0.90,  $\text{CHCl}_3$ ), 97% ee determined by HPLC after oxidized to the corresponding alcohol, HPLC conditions: Chiralcel AD-H, *n*-hexane/*i*-PrOH = 98/2, 1.0 mL/min, *n* = 220 nm, tr 13.3 (major), 14.3 (minor).  $^1\text{H}$  NMR (400 MHz,  $\text{CDCl}_3$ ):  $\delta$  7.22-7.13 (m, 2H), 7.12-7.05 (m, 2H), 2.27 (t, *J* = 8.0 Hz, 1H), 1.85-1.73 (m, 1H), 1.71-1.54 (m, 6H), 1.30-1.08 (m, 20H), 0.92-0.75 (m, 2H);  $^{13}\text{C}$  NMR (101 MHz,  $\text{CDCl}_3$ ):  $\delta$  145.7, 133.9, 129.4, 128.4, 126.5, 125.2, 83.4, 37.41, 37.37, 33.4, 33.3, 32.6, 26.7, 26.4, 24.60, 24.55. HRMS (ESI) calculated for  $[\text{M}+\text{Na}]^+[\text{C}_{22}\text{H}_{34}\text{BClO}_2\text{Na}]^+$  requires *m/z* 399.2238, found *m/z* 399.2231.

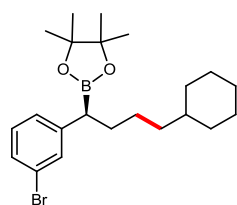

**(S)-2-(1-(3-bromophenyl)-4-cyclohexylbutyl)-4,4,5,5-tetramethyl-1,3,2-dioxaborolane (2i):** Prepared according to the general procedure using  $\text{Co}(\text{OAc})_2$  (0.0047 g, 0.027 mmol), **L8** (0.0125 g, 0.030 mmol),  $\text{Et}_2\text{O}$  (1 mL), **1i** (0.2963 g, 1.0 mmol) and HBpin (180  $\mu\text{L}$ , 1.2 mmol). After 48 h, the resulting solution was added 20 mL of ether and filtered through a pad of silica gel, washed by ether (10 mL  $\times$  2). The combined filtrates were concentrated and purified by flash column chromatography using PE/EtOAc = 100/1 as the eluent to afford **2i** (0.3378 g, 0.80 mmol, 79 % yield) a colorless oil. IR (neat): 2923, 2852, 1471, 1360, 1325, 1143  $\text{cm}^{-1}$ ; Optical Rotation:  $[\alpha]_{\text{D}}^{20} = +13.9$  (c 1.02,  $\text{CHCl}_3$ ), 97 % ee determined by HPLC, HPLC conditions: Chiralcel AS-H, *n*-hexane/*i*-PrOH = 99/1, 0.8 mL/min, *n* = 220 nm, tr 18.5 (minor), 19.5 (major).  $^1\text{H}$  NMR (400 MHz,  $\text{CDCl}_3$ ):  $\delta$  7.41-7.31 (m, 1H), 7.27-7.22 (m, 1H), 7.18-7.06 (m, 2H), 2.26 (t, *J* = 7.6 Hz, 1H), 1.83-1.73 (m, 1H), 1.72-1.52 (m, 6H), 1.33-1.10 (m, 20H), 0.92-0.72 (m, 2H);  $^{13}\text{C}$  NMR (101 MHz,  $\text{CDCl}_3$ ):  $\delta$  146.0, 131.3, 129.7, 128.2, 127.0, 122.3, 83.4, 37.42, 37.36, 33.4, 33.3, 32.7, 26.7, 26.4, 24.60, 24.56; HRMS (EI) calculated for  $[\text{C}_{22}\text{H}_{34}\text{BBrO}_2]^+$  requires *m/z* 420.1835, found *m/z* 420.1838.

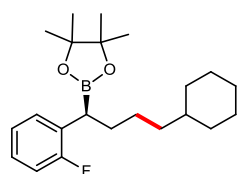

**(S)-2-(4-cyclohexyl-1-(2-fluorophenyl)butyl)-4,4,5,5-tetramethyl-1,3,2-dioxaborolane (2j):** Prepared according to the general procedure using  $\text{Co}(\text{OAc})_2$  (0.0176 g, 0.099 mmol), **L8** (0.0494 g, 0.120 mmol),  $\text{Et}_2\text{O}$  (1



mL), **1j** (0.2360 g, 1.0 mmol) and HBpin (180  $\mu$ L, 1.2 mmol). After 48 h, the resulting solution was added 20 mL of ether and filtered through a pad of silica gel, washed by ether (10 mL  $\times$  2). The combined filtrates were concentrated and purified by flash column chromatography using PE/EtOAc = 100/1 as the eluent to afford **2j** (0.2322 g, 0.80 mmol, 63 % yield) a colorless oil. IR (neat): 2923, 2852, 1453, 1370, 1324, 1144  $\text{cm}^{-1}$ ; Optical Rotation:  $[\alpha]_{\text{D}}^{20} = +23.5$  (c 1.05,  $\text{CHCl}_3$ ), 99 % ee determined by HPLC, HPLC conditions: Chiralcel AS-H, *n*-hexane/*i*-PrOH = 98/2, 1.0 mL/min,  $n = 220$  nm, tr 8.4 (minor), 9.1 (major).  $^1\text{H}$  NMR (400 MHz,  $\text{CDCl}_3$ ): 7.23 (dt,  $J = 7.6$ , 1.6 Hz, 1H), 7.15-7.07 (m, 1H), 7.03 (dt,  $J = 7.2$ , 1.2 Hz, 1H), 7.01-6.93 (m, 1H), 2.52 (t,  $J = 7.6$  Hz, 1H), 1.85-1.74 (m, 1H), 1.70-1.56 (m, 6H), 1.32-1.04 (m, 20H), 0.90-0.71 (m, 2H);  $^{13}\text{C}$  NMR (101 MHz,  $\text{CDCl}_3$ ):  $\delta$  161.0 (d,  $J = 244.5$  Hz, 1C), 130.6 (d,  $J = 15.5$  Hz, 1C), 130.3 (d,  $J = 5.2$  Hz, 1C), 126.5 (d,  $J = 8.1$  Hz, 1C), 123.8 (d,  $J = 3.7$  Hz, 1C), 115.0 (d,  $J = 22.8$  Hz, 1C), 83.3, 37.5, 37.4, 33.4, 33.3, 31.5, 26.7, 26.4, 26.3, 24.7, 24.6;  $^{19}\text{F}$  NMR: (376 MHz,  $\text{CDCl}_3$ ) :  $\delta$  -117.2; HRMS (EI) calculated for  $[\text{C}_{22}\text{H}_{34}\text{BFO}_2]^+$  requires  $m/z$  360.2636, found  $m/z$  360.2636.

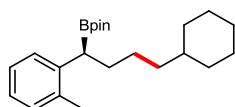

(*S*)-2-(4-cyclohexyl-1-(*o*-tolyl)butyl)-4,4,5,5-tetramethyl-1,3,2-dioxaborolane (**2k**): Prepared according to the general procedure using  $\text{Co}(\text{OAc})_2$

(0.0180 g, 0.10 mmol), **L8** (0.0496 g, 0.12 mmol),  $\text{Et}_2\text{O}$  (1 mL), **1k** (0.2298 g, 1.0 mmol) and HBpin (180  $\mu$ L, 1.2 mmol). After 48 h, the resulting solution was added 20 mL of ether and filtered through a pad of silica gel, washed by ether (10 mL  $\times$  2). The combined filtrates were concentrated and purified by flash column chromatography using PE/EtOAc = 100/1 as the eluent to afford **2k** (0.1097 g, 0.31 mmol, 31% yield) as a colorless oil. >99% ee determined by HPLC after oxidized to the corresponding alcohol, HPLC conditions: Chiralcel AS-H, *n*-hexane/*i*-PrOH = 98/2, 1.0 mL/min,  $n = 220$  nm, tr 7.0 (minor), 7.9 (major). IR (neat): 2923, 2852, 1454, 1363, 1321, 1144  $\text{cm}^{-1}$ ; Optical Rotation:  $[\alpha]_{\text{D}}^{20} = +9.7$  (c 1.01,  $\text{CHCl}_3$ );  $^1\text{H}$  NMR (400 MHz,  $\text{CDCl}_3$ ):  $\delta$  7.24-7.18 (m, 1H), 7.15-7.07 (m, 2H), 7.05-6.98 (m, 1H), 2.49 (t,  $J = 7.6$  Hz, 1H), 2.32 (s, 3H), 1.88-1.77 (m, 1H), 1.71-1.56 (m, 6H), 1.36-1.09 (m, 20H), 0.91-0.76 (m, 2H);  $^{13}\text{C}$  NMR (101 MHz,  $\text{CDCl}_3$ ):  $\delta$  142.0, 135.9, 130.0, 127.7, 125.8, 124.8, 83.1, 37.6, 37.5, 33.44, 33.38, 32.5, 26.8, 26.7, 26.4, 24.7, 24.6, 20.1; HRMS (ESI) calculated for  $[\text{M}+\text{Na}]^+$   $[\text{C}_{23}\text{H}_{37}\text{BO}_2\text{Na}]^+$  requires  $m/z$  379.2784, found  $m/z$  379.2800.

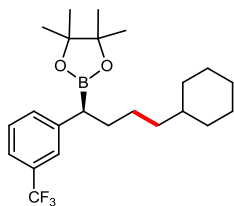

**(S)-2-(4-cyclohexyl-1-(3-(trifluoromethyl)phenyl)butyl)-4,4,5,5-tetra-**

**thyl-1,3,2-dioxaborolane (21):** Prepared according to the general

procedure using  $\text{Co}(\text{OAc})_2$  (0.0043 g, 0.024 mmol), **L8** (0.0126 g, 0.031

mmol),  $\text{Et}_2\text{O}$  (1 mL), **11** (0.2839 g, 1.0 mmol) and HBpin (180  $\mu\text{L}$ , 1.2

mmol). After 20 h, the resulting solution was added 20 mL of ether and filtered through a pad of

silica gel, washed by ether (10 mL  $\times$  2). The combined filtrates were concentrated and purified by

flash column chromatography using PE/EtOAc = 20/1 as the eluent to afford **21** (0.2243 g, 0.55

mmol, 54% yield) as a colorless oil. IR (neat): 2925, 2854, 1451, 1370, 1329, 1132  $\text{cm}^{-1}$ ; Optical

Rotation:  $[\alpha]_{\text{D}}^{20} = +8.5$  (c 0.95,  $\text{CHCl}_3$ ), 97% ee determined by HPLC after oxidized to the

corresponding alcohol, HPLC conditions: Chiralcel AD-H, *n*-hexane/*i*-PrOH = 98/2, 1.0 mL/min,

$n = 220$  nm, tr 8.2 (major), 8.9 (minor).  $^1\text{H}$  NMR (400 MHz,  $\text{CDCl}_3$ ):  $\delta$  7.47 (s, 1H), 7.42-7.32 (m,

3H), 2.36 (t,  $J = 8.0$  Hz, 1H), 1.88-1.76 (m, 1H), 1.70-1.57 (m, 6H), 1.32-1.08 (m, 20H), 0.90-0.75

(m, 2H);  $^{13}\text{C}$  NMR (101 MHz,  $\text{CDCl}_3$ ):  $\delta$  144.5, 131.7, 130.4 (q,  $J = 31.6$  Hz, 1C), 128.5, 125.0 (q,

$J = 3.7$  Hz, 1C), 124.4 (q,  $J = 273.2$  Hz, 1C), 122.0 (q,  $J = 2.9$  Hz, 1C), 83.5, 37.4, 37.3, 33.4, 33.3,

32.8, 26.7, 26.4, 24.5;  $^{19}\text{F}$  NMR (376 MHz,  $\text{CDCl}_3$ ):  $\delta$  -62.5. HRMS (ESI) calculated for

$[\text{M}+\text{Na}]^+[\text{C}_{23}\text{H}_{34}\text{BF}_3\text{O}_2\text{Na}]^+$  requires  $m/z$  433.2502, found  $m/z$  433.2498.

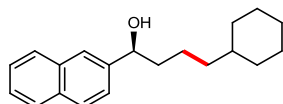

**(S)-4-cyclohexyl-1-(naphthalen-2-yl)butan-1-ol (3m):** Prepared

according to the general procedure using  $\text{Co}(\text{OAc})_2$  (0.0045 g, 0.025

mmol), **L8** (0.0126 g, 0.031 mmol),  $\text{Et}_2\text{O}$  (1 mL), **1m** (0.2645 g, 1.0 mmol) and HBpin (180  $\mu\text{L}$ ,

1.2 mmol). After 20 h, the resulting solution was added 20 mL of ether and filtered through a pad

of silica gel, washed by ether (10 mL  $\times$  2). The combined filtrates were concentrated and dissolved

in ether (10 mL). The solution was cooled to 0  $^\circ\text{C}$  with an ice-water bath and NaOH (2 mL of a 2

M aqueous solution) was added followed by  $\text{H}_2\text{O}_2$  (2 mL of a 30% aqueous solution). After

stirring at room temperature for 2 hour, the reaction mixture was diluted with ether and water. The

organic layer was separated and the aqueous layer extracted with EtOAc (3  $\times$  20 mL). The

combined organic phases were dried over anhydrous  $\text{Na}_2\text{SO}_4$  and concentrated in vacuo and

purified by flash column chromatography using PE/EtOAc = 10/1 as the eluent to afford **3m**

(0.2357 g, 0.83 mmol, 83% yield) as a colorless oil. IR (neat): 3264, 2922, 2852, 1453, 1371,

1313, 1048  $\text{cm}^{-1}$ ; Optical Rotation:  $[\alpha]_{\text{D}}^{20} = -20.9$  (c 0.90,  $\text{CHCl}_3$ ), 98% ee determined by HPLC,

HPLC conditions: Chiralcel AS-H, *n*-hexane/*i*-PrOH = 98/2, 1.0 mL/min, *n* = 220 nm, tr 10.5 (minor), 13.6 (major). <sup>1</sup>H NMR (400 MHz, CDCl<sub>3</sub>): δ 7.86-7.80 (m, 3H), 7.77 (s, 1H), 7.52-7.43 (m, 3H), 4.87-4.79 (m, 1H), 1.95-1.57 (m, 8H), 1.51-1.38 (m, 1H), 1.36-1.05 (m, 7H), 0.91-0.77 (m, 2H); <sup>13</sup>C NMR (101 MHz, CDCl<sub>3</sub>): δ 142.3, 133.3, 132.9, 128.2, 127.9, 127.7, 126.1, 125.7, 124.6, 124.1, 74.8, 39.3, 37.5, 37.3, 33.4, 33.3, 26.7, 26.4, 23.1. HRMS (ESI) calculated for [M+Na]<sup>+</sup>[C<sub>20</sub>H<sub>26</sub>ONa]<sup>+</sup> requires *m/z* 305.1881, found *m/z* 305.1893.

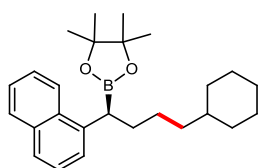

**(S)-2-(4-cyclohexyl-1-(naphthalen-1-yl)butyl)-4,4,5,5-tetramethyl-1,3-dioxaborolane (2n):** Prepared according to the general procedure using Co(OAc)<sub>2</sub> (0.0089 g, 0.050 mmol), **L8** (0.0251 g, 0.061 mmol), Et<sub>2</sub>O (1 mL), **1n** (0.2661 g, 1.0 mmol) and HBpin (180 μL, 1.2 mmol).

After 48 h, the resulting solution was added 20 ml of ether and filtered through a pad of silica gel, washed by ether (10 mL × 2). The combined filtrates were concentrated and purified by flash column chromatography using PE/EtOAc = 100/1 as the eluent to afford **2n** (0.2761 g, 0.70 mmol, 70% yield) as a white solid. IR (neat): 2922, 2851, 1322, 1143 cm<sup>-1</sup>; Optical Rotation: [α]<sub>D</sub><sup>20</sup> = +27.4 (c 0.90, CHCl<sub>3</sub>), >99% ee determined by HPLC after oxidized to the corresponding alcohol, HPLC conditions: Chiralcel AS-H, *n*-hexane/*i*-PrOH = 98/2, 1.0 mL/min, *n* = 220 nm, tr 11.0 (minor), 13.4 (major). <sup>1</sup>H NMR (400 MHz, CDCl<sub>3</sub>): δ 8.16 (d, *J* = 8.4 Hz, 1H), 7.84-7.74 (m, 1H), 7.68-7.56 (m, 1H), 7.57-7.32 (m, 4H), 3.02 (dd, *J* = 8.0, 7.6 Hz, 1H), 2.10-1.98 (m, 1H), 1.82-1.73 (m, 1H), 1.69-1.57 (m, 5H), 1.42-1.30 (m, 2H), 1.24-1.04 (m, 18H), 0.89-0.75 (m, 2H); <sup>13</sup>C NMR (101 MHz, CDCl<sub>3</sub>): δ 140.1, 134.0, 132.2, 128.7, 125.71, 125.67, 125.3, 125.13, 125.06, 124.2, 83.3, 37.6, 37.5, 33.40, 33.35, 32.4, 26.8, 26.7, 26.4, 24.7, 24.5. HRMS (ESI) calculated for [M+H]<sup>+</sup>[C<sub>26</sub>H<sub>38</sub>BO<sub>2</sub>]<sup>+</sup> requires *m/z* 393.2965, found *m/z* 393.2967.

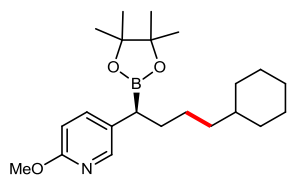

**(S)-5-(4-cyclohexyl-1-(4,4,5,5-tetramethyl-1,3,2-dioxaborolan-2-yl)butyl)-2-methoxypyridine (2o):** Prepared according to the general procedure using Co(OAc)<sub>2</sub> (0.0043 g, 0.024 mmol), **L8** (0.0127 g, 0.031 mmol), Et<sub>2</sub>O (1 mL), **1o** (0.2458 g, 1.0 mmol) and HBpin (180 μL, 1.2 mmol).

After 20 h, the resulting solution was added 20 mL of ether and filtered through a pad of silica gel, washed by ether (10 mL × 2). The combined filtrates were concentrated and

purified by flash column chromatography using PE/EtOAc = 10/1 as the eluent to afford **2o** (0.2405 g, 0.64 mmol, 64% yield) as a colorless oil. IR (neat): 2979, 2923, 2851, 1605, 1491, 1452, 1367, 1323, 1283, 1143  $\text{cm}^{-1}$ ; Optical Rotation:  $[\alpha]_{\text{D}}^{20} = +17.1$  (c 1.13,  $\text{CHCl}_3$ ), 97% ee determined by HPLC after oxidized to the corresponding alcohol, HPLC conditions: Chiralcel AD-H, *n*-hexane/*i*-PrOH = 98/2, 1.0 mL/min,  $n = 220$  nm, tr 21.8 (major), 25.8 (minor).  $^1\text{H}$  NMR (400 MHz,  $\text{CDCl}_3$ ):  $\delta$  7.97 (s, 1H), 7.45 (d,  $J = 8.4$  Hz, 1H), 6.66 (d,  $J = 7.6$  Hz, 1H), 3.90 (s, 3H), 2.22 (t,  $J = 7.2$  Hz, 1H), 1.81-1.50 (m, 7H), 1.30-1.08 (m, 20H), 0.90-0.74 (m, 2H);  $^{13}\text{C}$  NMR (101 MHz,  $\text{CDCl}_3$ ):  $\delta$  162.2, 146.0, 138.9, 131.4, 110.3, 83.4, 53.2, 37.5, 37.3, 33.4, 33.3, 33.0, 29.7, 28.3, 26.7, 26.4, 26.2, 24.65, 24.60. HRMS (ESI) calculated for  $[\text{M}+\text{Na}]^+[\text{C}_{22}\text{H}_{36}\text{BNO}_3\text{Na}]^+$  requires  $m/z$  396.2686, found  $m/z$  396.2687.

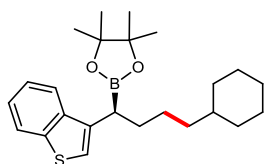

**(S)-2-(1-(benzo[*b*]thiophen-3-yl)-4-cyclohexylbutyl)-4,4,5,5-tetramethyl-1,3,2-dioxaborolane (**2p**):** Prepared according to the

general procedure using  $\text{Co}(\text{OAc})_2$  (0.0086 g, 0.049mmol), **L8** (0.0246 g, 0.060mmol),  $\text{Et}_2\text{O}$  (1 mL), **1p** (0.2911 g, 1.0 mmol) and HBpin (180  $\mu\text{L}$ , 1.2 mmol). After 24 h, the resulting solution was added 20 mL of ether and filtered through a pad of silica gel, washed by ether (10 mL  $\times$  2). The combined filtrates were concentrated and purified by flash column chromatography using PE/EtOAc = 100/1 as the eluent to afford **2p** (0.3361 g, 0.87mmol, 87% yield) as a white solid. IR (neat): 2921, 2850, 1368, 1323, 1142  $\text{cm}^{-1}$ ; Optical Rotation:  $[\alpha]_{\text{D}}^{20} = +12.4$  (c 1.02,  $\text{CHCl}_3$ ), 99% ee determined by HPLC after oxidized to the corresponding alcohol, HPLC conditions: Chiralcel AS-H, *n*-hexane/*i*-PrOH = 99/1, 1.0 mL/min,  $n = 220$  nm, tr 15.02 (major), 16.17 (minor).  $^1\text{H}$  NMR (400 MHz,  $\text{CDCl}_3$ ):  $\delta$  7.92-7.74 (m, 2H), 7.38-7.28 (m, 2H), 7.14 (s, 1H), 2.73 (t,  $J = 7.6$  Hz, 1H), 1.98-1.84 (m, 1H), 1.82-1.73 (m, 1H), 1.72-1.57 (m, 5H), 1.41-1.31 (m, 2H), 1.26-1.10 (m, 18H), 0.90-0.78 (m, 2H);  $^{13}\text{C}$  NMR (101 MHz,  $\text{CDCl}_3$ ):  $\delta$  140.3, 139.2, 137.7, 123.9, 123.4, 122.7, 122.1, 120.3, 83.4, 37.49, 37.46, 33.4, 31.7, 26.71, 26.67, 26.4, 24.7, 24.6. HRMS (ESI) calculated for  $[\text{M}+\text{H}]^+[\text{C}_{24}\text{H}_{36}\text{BO}_2\text{S}]^+$  requires  $m/z$  399.2529, found  $m/z$  399.2532.

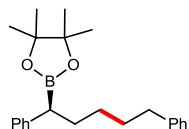

**(S)-2-(1,5-diphenylpentyl)-4,4,5,5-tetramethyl-1,3,2-dioxaborolane (**2q**):**

Prepared according to the general procedure using  $\text{Co}(\text{OAc})_2$  (0.0045 g, 0.025

mmol), **L8** (0.0126 g, 0.031 mmol), Et<sub>2</sub>O (1 mL), **1q** (0.2220 g, 1.0 mmol) and HBpin (180 μL, 1.2 mmol). After 20 h, the resulting solution was added 20 mL of ether and filtered through a pad of silica gel, washed by ether (10 mL×2). The combined filtrates were concentrated and purified by flash column chromatography using PE/EtOAc = 20/1 as the eluent to afford **2q** (0.3200 g, 0.91 mmol, 91% yield) as a colorless oil. IR (neat): 2978, 2929, 2858, 1458, 1368, 1325, 1145 cm<sup>-1</sup>; Optical Rotation:  $[\alpha]_D^{20} = +17.4$  (c 1.29, CHCl<sub>3</sub>) (lit.<sup>23</sup>:  $[\alpha]_D^{20} = -11.8$  (c 2.43, CHCl<sub>3</sub>), 98% ee), 99% ee determined by HPLC after oxidized to the corresponding alcohol, HPLC conditions: Chiralcel AS-H, *n*-hexane/*i*-PrOH = 98/2, 1.0 mL/min, *n* = 220 nm, tr 11.9 (minor), 13.5 (major). <sup>1</sup>H NMR (400 MHz, CDCl<sub>3</sub>): δ 7.28-7.18 (m, 6H), 7.17-7.10 (m, 4H), 2.61-2.51 (m, 2H), 2.29 (t, *J* = 7.6 Hz, 1H), 1.93-1.80 (m, 1H), 1.75-1.59 (m, 3H), 1.37-1.28 (m, 2H), 1.18 (s, 6H), 1.16 (s, 6H); <sup>13</sup>C NMR (101 MHz, CDCl<sub>3</sub>): δ 143.3, 142.8, 128.4, 128.3, 128.22, 128.16, 125.5, 125.1, 83.2, 35.8, 32.5, 31.4, 28.9, 24.6, 24.5. HRMS (EI) calculated for [C<sub>23</sub>H<sub>31</sub>BO<sub>2</sub>]<sup>+</sup> requires *m/z* 350.2417, found *m/z* 350.2414.

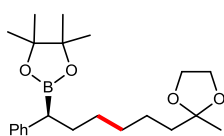

**(S)-4,4,5,5-tetramethyl-2-(6-(2-methyl-1,3-dioxolan-2-yl)-1-phenylhexyl)-1,3,2-dioxaborolane (2r)**: Prepared according to the general procedure using Co(OAc)<sub>2</sub> (0.0045 g, 0.025 mmol), **L8** (0.0126 g, 0.031 mmol), Et<sub>2</sub>O

(1 mL), **1r** (0.2468 g, 1.0 mmol) and HBpin (180 μL, 1.2 mmol). After 20 h, the resulting solution was added 20 mL of ether and filtered through a pad of silica gel, washed by ether (10 mL × 2). The combined filtrates were concentrated and purified by flash column chromatography using PE/EtOAc = 20/1 as the eluent to afford **2r** (0.2664 g, 0.71 mmol, 71% yield) as a colorless oil. IR (neat): 2981, 2933, 1457, 1369, 1324, 1144, 1070 cm<sup>-1</sup>; Optical Rotation:  $[\alpha]_D^{20} = +15.9$  (c 1.39, CHCl<sub>3</sub>), 99% ee determined by HPLC, HPLC conditions: Chiralcel OJ-H, *n*-hexane/*i*-PrOH = 99/1, 0.5 mL/min, *n* = 220 nm, tr 9.9 (minor), 11.0 (major). <sup>1</sup>H NMR (400 MHz, CDCl<sub>3</sub>): δ 7.27-7.16 (m, 4H), 7.15-7.09 (m, 1H), 3.96-3.85 (m, 4H), 2.28 (t, *J* = 8.4 Hz, 1H), 1.89-1.78 (m, 1H), 1.70-1.56 (m, 3H), 1.39-1.22 (m, 9H), 1.20 (s, 6H), 1.18 (s, 6H); <sup>13</sup>C NMR (101 MHz, CDCl<sub>3</sub>): δ 143.4, 128.3, 128.2, 125.0, 110.2, 83.2, 64.5, 39.2, 32.4, 29.9, 29.2, 24.6, 24.5, 24.0, 23.7. HRMS (ESI) calculated for [M+H]<sup>+</sup> calculated for [C<sub>22</sub>H<sub>36</sub>BO<sub>4</sub>]<sup>+</sup> requires *m/z* 375.2707, found *m/z* 375.2706.

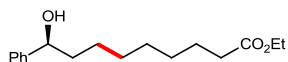

**(S)-ethyl 9-hydroxy-9-phenylnonanoate (3s):** Prepared according to the general procedure using  $\text{Co}(\text{OAc})_2$  (0.0088 g, 0.050 mmol), **L8** (0.0246 g, 0.060 mmol),  $\text{Et}_2\text{O}$  (1 mL), **1s** (0.2609 g, 1.0 mmol) and HBpin (180  $\mu\text{L}$ , 1.2 mmol). After 20 h, the resulting solution was added 20 mL of ether and filtered through a pad of silica gel, washed by ether (10 mL x 3). The combined filtrates were concentrated and dissolved in ether (10 mL). The solution was cooled to 0  $^\circ\text{C}$  with an ice-water bath and NaOH (2 mL of a 2 M aqueous solution) was added followed by  $\text{H}_2\text{O}_2$  (2 mL of a 30% aqueous solution). After stirring at room temperature for 2 hour, the reaction mixture was diluted with ether and water. The organic layer was separated and the aqueous layer extracted with EtOAc (3  $\times$  20 mL). The combined organic phases were dried over anhydrous  $\text{Na}_2\text{SO}_4$  and concentrated in vacuo and purified by flash column chromatography using PE/EtOAc = 10/1 and PE/EtOAc = 5/1 as the eluent to afford **3s** (0.1821 g, 0.65 mmol, 65% yield) as a colorless oil. IR (neat): 3446, 2930, 2858, 1731, 1456, 1376, 1188, 1034  $\text{cm}^{-1}$ ; Optical Rotation:  $[\alpha]_{\text{D}}^{20} = -21.6$  (c 1.22,  $\text{CHCl}_3$ ), 99% ee determined by HPLC, HPLC conditions: Chiralcel AS-H, *n*-hexane/*i*-PrOH = 98/2, 1.0 mL/min,  $n = 220$  nm, tr 23.6 (minor), 25.7 (major).  $^1\text{H}$  NMR (400 MHz,  $\text{CDCl}_3$ ):  $\delta$  7.38-7.31 (m, 4H), 7.30-7.23 (m, 1H), 4.70-4.60 (m, 1H), 4.11 (q,  $J = 6.8$  Hz, 2H), 2.27 (t,  $J = 7.6$  Hz, 2H), 1.89 (s, 1H), 1.84-1.67 (m, 2H), 1.62-1.54 (m, 2H), 1.46-1.36 (m, 1H), 1.33-1.21 (m, 10H);  $^{13}\text{C}$  NMR (101 MHz,  $\text{CDCl}_3$ ):  $\delta$  173.9, 144.9, 128.4, 127.5, 125.9, 74.6, 60.1, 39.0, 34.3, 29.3, 29.1, 29.0, 25.7, 24.9, 14.2. HRMS (ESI) calculated for  $[\text{M}+\text{Na}]^+[\text{C}_{17}\text{H}_{26}\text{O}_3\text{Na}]^+$  requires  $m/z$  301.1780, found  $m/z$  301.1781.

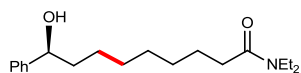

**(S)-N,N-diethyl-9-hydroxy-9-phenylnonanamide (3t):** Prepared according to the general procedure using  $\text{Co}(\text{OAc})_2$  (0.0090 g, 0.051 mmol), **L8** (0.0247 g, 0.060 mmol),  $\text{Et}_2\text{O}$  (1 mL), **1t** (0.2852 g, 0.99 mmol) and HBpin (300  $\mu\text{L}$ , 2.0 mmol). After 36 h, the resulting solution was added 20 mL of ether and filtered through a pad of silica gel, washed by ether (10 mL x 3). The combined filtrates were concentrated and dissolved in THF/ $\text{H}_2\text{O}$  (10/10 mL). The solution was cooled to 0  $^\circ\text{C}$  with an ice-water bath and  $\text{NaBO}_3 \cdot 4\text{H}_2\text{O}$  (0.6188 g, 4.0 mmol) was added to this solution. After stirring at room temperature for 2 hour, the reaction mixture was diluted with ether and water. The organic layer was separated and the aqueous layer extracted with EtOAc (4  $\times$  20 mL). The combined organic phases were dried over anhydrous  $\text{Na}_2\text{SO}_4$  and concentrated in vacuo and purified by flash column chromatography using

PE/EtOAc (5/1 to 2/1) as the eluent to afford **3t** (0.1950 g, 0.64 mmol, 64% yield) as a colorless oil. IR (neat): 3403, 2930, 2854, 1623, 1454  $\text{cm}^{-1}$ ; Optical Rotation:  $[\alpha]_{\text{D}}^{20} = -21.0$  (c 0.95,  $\text{CHCl}_3$ ), 99% ee determined by HPLC, HPLC conditions: Chiralcel OD-H, *n*-hexane/*i*-PrOH = 90/10, 1.0 mL/min, *n* = 220 nm, tr 18.3 (major), 20.2 (minor).  $^1\text{H}$  NMR (400 MHz,  $\text{CDCl}_3$ ):  $\delta$  7.38-7.24 (m, 5H), 4.66 (dd, *J* = 6.8, 6.0 Hz, 1H), 3.35 (q, *J* = 7.2 Hz, 2H), 3.28 (q, *J* = 7.2 Hz, 2H), 2.26 (t, *J* = 7.6 Hz, 2H), 2.11 (s, 1H), 1.89-1.54 (m, 4H), 1.46-1.22 (m, 8H), 1.16 (t, *J* = 7.2 Hz, 3H), 1.10 (t, *J* = 7.2 Hz, 3H);  $^{13}\text{C}$  NMR (101 MHz,  $\text{CDCl}_3$ ):  $\delta$  172.3, 145.0, 128.4, 127.4, 125.9, 74.5, 41.9, 40.0, 39.1, 33.1, 29.4, 29.3, 25.7, 25.4, 14.4, 13.1. HRMS (ESI) calculated for  $[\text{M}+\text{Na}]^+[\text{C}_{19}\text{H}_{31}\text{NO}_2\text{Na}]^+$  requires *m/z* 328.2252, found *m/z* 328.2256.

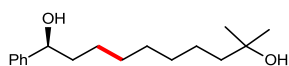

**(S)-9-methyl-1-phenyldecane-1,9-diol (3u)**: Prepared according to the general procedure using  $\text{Co}(\text{OAc})_2$  (0.0045 g, 0.025 mmol), **L8** (0.0124 g, 0.03 mmol),  $\text{Et}_2\text{O}$  (1 mL), **1u** (0.1235 g, 0.5 mmol) and HBpin (180  $\mu\text{L}$ , 1.2 mmol). After 20 h, the resulting solution was added 20 mL of ether and filtered through a pad of silica gel, washed by ether (10 mL x 3). The combined filtrates were concentrated and dissolved in ether (10 mL). The solution was cooled to 0  $^\circ\text{C}$  with an ice-water bath and NaOH (2 mL of a 2 M aqueous solution) was added followed by  $\text{H}_2\text{O}_2$  (2 mL of a 30% aqueous solution). After stirring at room temperature for 2 h, the reaction mixture was diluted with ether and water. The organic layer was separated and the aqueous layer extracted with EtOAc (3  $\times$  20 mL). The combined organic phases were dried over anhydrous  $\text{Na}_2\text{SO}_4$  and concentrated in vacuo and purified by flash column chromatography using PE/EtOAc = 5/1 as the eluent to afford **3u** (0.0610 g, 0.23 mmol, 46% yield) as a colorless oil. IR (neat): 3360, 2931, 2856, 1454, 1378, 1045  $\text{cm}^{-1}$ ; Optical Rotation:  $[\alpha]_{\text{D}}^{20} = -24.2$  (c 2.10,  $\text{CHCl}_3$ ), 99% ee determined by HPLC, HPLC conditions: Chiralcel AS-H, *n*-hexane/*i*-PrOH = 90/10, 1.0 mL/min, *n* = 220 nm, tr 7.6 (minor), 8.2 (major).  $^1\text{H}$  NMR (400 MHz,  $\text{CDCl}_3$ ):  $\delta$  7.38-7.29 (m, 4H), 7.30-7.22 (m, 1H), 4.63 (t, *J* = 6.4 Hz, 1H), 2.22 (s, 1H), 1.86-1.61 (m, 2H), 1.48-1.34 (m, 4H), 1.36-1.21 (m, 9H), 1.18 (s, 6H);  $^{13}\text{C}$  NMR (101 MHz,  $\text{CDCl}_3$ ):  $\delta$  144.9, 128.3, 127.4, 125.8, 74.5, 71.0, 43.8, 39.0, 30.0, 29.45, 29.40, 29.1, 25.7, 24.2. HRMS (ESI) calculated for  $[\text{M}+\text{Na}]^+[\text{C}_{17}\text{H}_{28}\text{O}_2\text{Na}]^+$  requires *m/z* 287.1987, found *m/z* 287.1987.

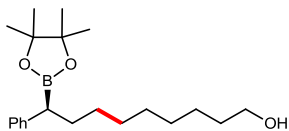

**(S)-9-phenyl-9-(4,4,5,5-tetramethyl-1,3,2-dioxaborolan-2-yl)nonan-1-ol (2v):** Prepared according to the general procedure using  $\text{Co}(\text{OAc})_2$  (0.0087 g, 0.049 mmol), **L8** (0.0249 g, 0.060 mmol),

$\text{Et}_2\text{O}$  (1 mL), **1v** (0.02183 g, 1.0 mmol) and HBpin (180  $\mu\text{L}$ , 1.2 mmol). After 24 h, the resulting solution was added 20 ml of ether and filtered through a pad of silica gel, washed by ether (20 ml x 3). The combined filtrates were concentrated and purified by flash column chromatography using PE/EtOAc = 3/1 as the eluent to afford **2v** (0.1500 g, 0.43 mmol, 43% yield) as a colorless oil. IR (neat): 3376, 2926, 2854, 1453, 1370, 1323, 1143  $\text{cm}^{-1}$ ; Optical Rotation:  $[\alpha]_{\text{D}}^{20} = +14.5$  (c 1.04,  $\text{CHCl}_3$ ), >99% ee determined by HPLC, HPLC conditions: Chiralcel AS-H, *n*-hexane/*i*-PrOH = 95/5, 1.0 mL/min,  $n = 220$  nm, tr 37.9 (minor), 40.1 (major).  $^1\text{H}$  NMR (400 MHz,  $\text{CDCl}_3$ ):  $\delta$  7.26-7.17 (m, 4H), 7.16-7.07 (m, 1H), 3.62 (t,  $J = 6.4$  Hz, 2H), 2.29 (t,  $J = 7.6$  Hz, 1H), 1.92-1.77 (m, 1H), 1.67-1.49 (m, 3H), 1.35-1.22 (m, 11H), 1.20 (s, 6H), 1.18 (s, 6H);  $^{13}\text{C}$  NMR (101 MHz,  $\text{CDCl}_3$ ):  $\delta$  143.5, 128.3, 128.2, 125.0, 83.2, 63.1, 32.8, 32.5, 29.5, 29.4, 29.3, 29.2, 25.7, 24.62, 24.55; HRMS (EI) calculated for  $[\text{C}_{21}\text{H}_{35}\text{BO}_3]^+$  requires  $m/z$  346.2679, found  $m/z$  346.2677.

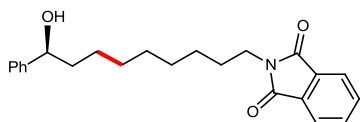

**(S)-2-(9-hydroxy-9-phenylnonyl)isoindoline-1,3-dione (3w):**

Prepared according to the general procedure using  $\text{Co}(\text{OAc})_2$  (0.0045 g, 0.025 mmol), **L8** (0.0125 g, 0.030 mmol),  $\text{Et}_2\text{O}$  (1 mL), **1w** (0.1740 g, 0.5 mmol) and HBpin (180  $\mu\text{L}$ , 1.2 mmol). After 20 h, the resulting solution was added 20 mL of ether and filtered through a pad of silica gel, washed by ether (10 mL x 3). The combined filtrates were concentrated and dissolved in ether (10 mL). The solution was cooled to 0  $^\circ\text{C}$  with an ice-water bath and NaOH (2 mL of a 2 M aqueous solution) was added followed by  $\text{H}_2\text{O}_2$  (2 mL of a 30% aqueous solution). After stirring at room temperature for 2 hour, the reaction mixture was diluted with ether and water. The organic layer was separated and the aqueous layer extracted with EtOAc (3 x 20 mL). The combined organic phases were dried over anhydrous  $\text{Na}_2\text{SO}_4$  and concentrated in vacuo and purified by flash column chromatography using PE/EtOAc = 5/1 as the eluent to afford **3w** (0.1029 g, 0.28 mmol, 56% yield) as a colorless oil. IR (neat): 3471, 2928, 2857, 1771, 1710, 1400, 1062  $\text{cm}^{-1}$ ; Optical Rotation:  $[\alpha]_{\text{D}}^{20} = -10.9$  (c 1.20,  $\text{CHCl}_3$ ), 86% ee determined by HPLC, HPLC conditions: Chiralcel AS-H, *n*-hexane/*i*-PrOH = 80/20, 1.0 mL/min,  $n = 220$  nm, tr 9.8



(minor), 11.0 (major).  $^1\text{H}$  NMR (400 MHz,  $\text{CDCl}_3$ ):  $\delta$  7.86-7.78 (m, 2H), 7.74-7.66 (m, 2H), 7.40-7.20 (m, 5H), 4.64 (t,  $J = 6.8$  Hz, 1H), 3.65 (t,  $J = 7.2$  Hz, 2H), 2.18 (s, 1H), 1.83-1.56 (m, 4H), 1.45-1.15 (m, 10H);  $^{13}\text{C}$  NMR (101 MHz,  $\text{CDCl}_3$ ):  $\delta$  168.4, 144.9, 133.8, 132.0, 128.3, 127.3, 125.8, 123.1, 74.5, 39.0, 37.9, 29.3, 29.2, 28.9, 28.5, 26.7, 25.6. HRMS (ESI) calculated for  $[\text{M}+\text{Na}]^+[\text{C}_{23}\text{H}_{27}\text{NO}_3\text{Na}]^+$  requires  $m/z$  388.1889, found  $m/z$  388.1892.

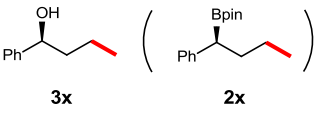
**(S)-1-phenylbutan-1-ol (3x)**: Prepared according to the general procedure using  $\text{Co}(\text{OAc})_2$  (0.0045 g, 0.025 mmol), **L8** (0.0125 g, 0.030 mmol),  $\text{Et}_2\text{O}$  (1 mL), **1x** (0.1328 g, 1.0 mmol) and HBpin (180  $\mu\text{L}$ , 1.2 mmol). After 20 h, the resulting solution was added 20 mL of ether and filtered through a pad of silica gel, washed by ether (10 mL  $\times$  2). The combined filtrates were concentrated and dissolved in ether (10 mL). The solution was cooled to 0  $^\circ\text{C}$  with an ice-water bath and NaOH (2 mL of a 2 M aqueous solution) was added followed by  $\text{H}_2\text{O}_2$  (2 mL of a 30% aqueous solution). After stirring at room temperature for 2 hour, the reaction mixture was diluted with ether and water. The organic layer was separated and the aqueous layer extracted with EtOAc (3  $\times$  20 mL). The combined organic phases were dried over anhydrous  $\text{Na}_2\text{SO}_4$  and concentrated in vacuo and purified by flash column chromatography using PE/EtOAc = 10/1 as the eluent to afford **3x** (0.0526 g, 0.35 mmol, 35% yield) as a colorless oil. IR (neat): 3381, 2957, 2869, 1455, 1025  $\text{cm}^{-1}$ ; Optical Rotation:  $[\alpha]_{\text{D}}^{20} = -51.3$  (c 0.83,  $\text{CHCl}_3$ ) (lit.<sup>24</sup>:  $[\alpha]_{\text{D}}^{20} = -47.6$  (c 0.5,  $\text{CHCl}_3$ ), 99% ee), >99% ee determined by HPLC, HPLC conditions: Chiralcel AS-H, *n*-hexane/*i*-PrOH = 98/2, 1.0 mL/min,  $n = 220$  nm, tr 8.8 (minor), 10.6 (major).  $^1\text{H}$  NMR (400 MHz,  $\text{CDCl}_3$ ):  $\delta$  7.39-7.32 (m, 4H), 7.30-7.24 (m, 1H), 4.66 (t,  $J = 6.4$  Hz, 1H), 1.92 (s, 1H), 1.84-1.74 (m, 1H), 1.72-1.62 (m, 1H), 1.50-1.38 (m, 1H), 1.36-1.22 (m, 1H), 0.93 (t,  $J = 7.2$  Hz, 3H);  $^{13}\text{C}$  NMR (101 MHz,  $\text{CDCl}_3$ ):  $\delta$  144.9, 128.4, 127.4, 125.9, 74.4, 41.2, 19.0, 13.9. All the spectroscopic data were in agreement with the reported ones.<sup>24</sup>The absolute configuration of **2x** was verified by comparison of the optical rotation of **3x** with previously reported data<sup>24</sup> and the other products were then assigned by analogy.

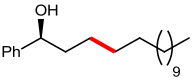
**(S)-1-phenylpentadecan-1-ol (3y)**: Prepared according to the general procedure using  $\text{Co}(\text{OAc})_2$  (0.0045 g, 0.025 mmol), **L8** (0.0126 g, 0.031 mmol),  $\text{Et}_2\text{O}$  (1 mL), **1y** (0.2880 g, 1.0 mmol) and HBpin (180  $\mu\text{L}$ , 1.2 mmol). After 20 h, the

resulting solution was added 20 mL of ether and filtered through a pad of silica gel, washed by ether (10 mL  $\times$  2). The combined filtrates were concentrated and dissolved in ether (10 mL). The solution was cooled to 0 °C with an ice-water bath and NaOH (2 mL of a 2 M aqueous solution) was added followed by H<sub>2</sub>O<sub>2</sub> (2 mL of a 30% aqueous solution). After stirring at room temperature for 2 hour, the reaction mixture was diluted with ether and water. The organic layer was separated and the aqueous layer extracted with EtOAc (3  $\times$  20 mL). The combined organic phases were dried over anhydrous Na<sub>2</sub>SO<sub>4</sub> and concentrated in vacuo and purified by flash column chromatography using PE/EtOAc = 10/1 as the eluent to afford **3y** (0.2008 g, 0.66 mmol, 65% yield) as a colorless oil. IR (neat): 3368, 2919, 2852, 1463, 1062 cm<sup>-1</sup>; Optical Rotation:  $[\alpha]_D^{20} = -18.3$  (c 1.03, CHCl<sub>3</sub>), 98% ee determined by HPLC, HPLC conditions: Chiralcel OD-H, *n*-hexane/*i*-PrOH = 98/2, 1.0 mL/min, *n* = 220 nm, tr 8.2 (minor), 10.1 (major). <sup>1</sup>H NMR (400 MHz, CDCl<sub>3</sub>):  $\delta$  7.38-7.32 (m, 4H), 7.31-7.24 (m, 1H), 4.70-4.63 (m, 1H), 1.90-1.65 (m, 3H), 1.44-1.20 (m, 24H), 0.88 (t, *J* = 6.8 Hz, 3H); <sup>13</sup>C NMR (101 MHz, CDCl<sub>3</sub>):  $\delta$  144.9, 128.4, 127.5, 125.9, 74.7, 39.1, 31.9, 29.68, 29.66, 29.64, 29.57, 29.53, 29.52, 29.4, 25.8, 22.7, 14.1. HRMS (ESI) calculated for [M+H]<sup>+</sup>[C<sub>21</sub>H<sub>37</sub>O]<sup>+</sup> requires *m/z* 305.2844, found *m/z* 305.2831.

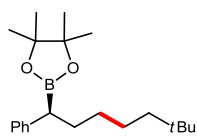

**(S)-2-(6,6-dimethyl-1-phenylheptyl)-4,4,5,5-tetramethyl-1,3,2-dioxaborolane (2z):** Prepared according to the general procedure using Co(OAc)<sub>2</sub> (0.0046 g, 0.026 mmol), **L8** (0.0125 g, 0.030 mmol), Et<sub>2</sub>O (1 mL), **1z** (0.2020 g, 1.0

mmol) and HBpin (180  $\mu$ L, 1.2 mmol). After 20 h, the resulting solution was added 20 mL of ether and filtered through a pad of silica gel, washed by ether (10 mL  $\times$  2). The combined filtrates were concentrated and purified by flash column chromatography using PE/EtOAc = 20/1 as the eluent to afford **2z** (0.2741 g, 0.83 mmol, 83% yield) as a colorless oil. IR (neat): 2934, 1465, 1367, 1324, 1146 cm<sup>-1</sup>; Optical Rotation:  $[\alpha]_D^{20} = +17.8$  (c 1.02, CHCl<sub>3</sub>), 98% ee determined by HPLC after oxidized to the corresponding alcohol, HPLC conditions: Chiralcel AS-H, *n*-hexane/*i*-PrOH = 98/2, 1.0 mL/min, *n* = 220 nm, tr 5.9 (minor), 6.4 (major). <sup>1</sup>H NMR (400 MHz, CDCl<sub>3</sub>):  $\delta$  7.28-7.18 (m, 4H), 7.15-7.09 (m, 1H), 2.29 (t, *J* = 8.0 Hz, 1H), 1.91-1.79 (m, 1H), 1.70-1.60 (m, 1H), 1.29-1.17 (m, 16H), 1.15-1.08 (m, 2H), 0.84 (s, 9H); <sup>13</sup>C NMR (101 MHz, CDCl<sub>3</sub>):  $\delta$  143.5, 128.4, 128.2, 125.0, 83.2, 44.1, 32.7, 30.3, 29.4, 24.62, 24.57. HRMS (ESI) calculated for [M+H]<sup>+</sup>[C<sub>21</sub>H<sub>36</sub>BO<sub>2</sub>]<sup>+</sup> requires *m/z* 331.2808, found *m/z* 331.2812.

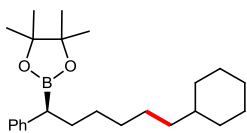

**(S)-2-(6-cyclohexyl-1-phenylhexyl)-4,4,5,5-tetramethyl-1,3,2-dioxaborolane (2aa):**

Prepared according to the general procedure using  $\text{Co}(\text{OAc})_2$  (0.0045 g, 0.025 mmol), **L8** (0.0123 g, 0.030 mmol),  $\text{Et}_2\text{O}$  (1 mL), **1aa** (0.2426 g, 1.0 mmol) and HBpin (180  $\mu\text{L}$ , 1.2 mmol). After 20 h, the resulting solution was added 20 mL of ether and filtered through a pad of silica gel, washed by ether (10 mL  $\times$  2). The combined filtrates were concentrated and purified by flash column chromatography using PE/EtOAc = 20/1 as the eluent to afford **2aa** (0.3203 g, 0.86 mmol, 86% yield) as a colorless oil. IR (neat): 2981, 2925, 2852, 1454, 1364, 1324, 1145  $\text{cm}^{-1}$ ; Optical Rotation:  $[\alpha]_{\text{D}}^{20} = +14.2$  (c 0.85,  $\text{CHCl}_3$ ), 99% ee determined by HPLC after oxidized to the corresponding alcohol, HPLC conditions: Chiralcel AS-H, *n*-hexane/*i*-PrOH = 98/2, 1.0 mL/min, *n* = 220 nm, tr 6.0 (minor), 6.5 (major).  $^1\text{H}$  NMR (400 MHz,  $\text{CDCl}_3$ ):  $\delta$  7.27-7.17 (m, 4H), 7.14-7.08 (m, 1H), 2.29 (t, *J* = 7.6 Hz, 1H), 1.87-1.78 (m, 1H), 1.71-1.57 (m, 6H), 1.31-1.06 (m, 24H), 0.90-0.77 (m, 2H);  $^{13}\text{C}$  NMR (101 MHz,  $\text{CDCl}_3$ ):  $\delta$  143.5, 128.3, 128.2, 125.0, 83.2, 37.6, 37.5, 33.4, 32.6, 29.9, 29.3, 26.8, 26.7, 26.4, 24.6, 24.5. HRMS (ESI) calculated for  $[\text{M}+\text{H}]^+[\text{C}_{24}\text{H}_{40}\text{BO}_2]^+$  requires *m/z* 371.3121, found *m/z* 371.3128.

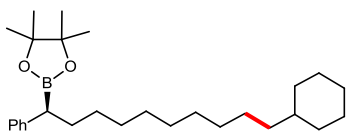

**(S)-2-(10-cyclohexyl-1-phenyldecyl)-4,4,5,5-tetramethyl-1,3,2-dioxaborolane (2ab):**

Prepared according to the general procedure using  $\text{Co}(\text{OAc})_2$  (0.0089 g, 0.050 mmol), **L8** (0.0249 g, 0.060 mmol),  $\text{Et}_2\text{O}$  (1 mL), **1ab** (0.2980 g, 1.0 mmol) and HBpin (180  $\mu\text{L}$ , 1.2 mmol). After 20 h, the resulting solution was added 20 mL of ether and filtered through a pad of silica gel, washed by ether (10 mL  $\times$  2). The combined filtrates were concentrated and purified by flash column chromatography using PE/EtOAc = 20/1 as the eluent to afford **2ab** (0.2482 g, 0.58 mmol, 58% yield) as a colorless oil. IR (neat): 2925, 2853, 1455, 1366, 1324, 1145  $\text{cm}^{-1}$ ; Optical Rotation:  $[\alpha]_{\text{D}}^{20} = +14.3$  (c 1.11,  $\text{CHCl}_3$ ); 99% ee determined by HPLC after oxidized to the corresponding alcohol, HPLC conditions: Chiralcel OD-H, *n*-hexane/*i*-PrOH = 98/2, 1.0 mL/min, *n* = 220 nm, tr 8.8 (minor), 10.7 (major).  $^1\text{H}$  NMR (400 MHz,  $\text{CDCl}_3$ ):  $\delta$  7.27-7.18 (m, 4H), 7.15-7.08 (m, 1H), 2.29 (t, *J* = 8.0 Hz, 1H), 1.86-1.77 (m, 1H), 1.75-1.57 (m, 6H), 1.31-1.08 (m, 32H), 0.90-0.78 (m, 2H);  $^{13}\text{C}$  NMR (101 MHz,  $\text{CDCl}_3$ ):  $\delta$  143.5, 128.3, 128.2, 125.0, 83.2, 37.7, 37.6, 33.4, 32.6, 30.0, 29.7, 29.6, 29.5, 29.3, 26.9, 26.8, 26.4, 24.6, 24.5. HRMS (ESI) calculated for

$[M+Na]^+[C_{28}H_{47}BO_2Na]^+$  requires  $m/z$  449.3567, found  $m/z$  449.3577.

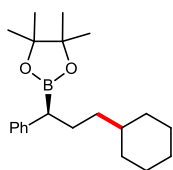

**(S)-2-(3-cyclohexyl-1-phenylpropyl)-4,4,5,5-tetramethyl-1,3,2-dioxaborolane**

**(2ac):** Prepared according to the general procedure using  $Co(OAc)_2$  (0.0045 g, 0.025 mmol), **L8** (0.0125 g, 0.030 mmol),  $Et_2O$  (1 mL), **1ac** (0.2006 g, 1.0 mmol) and HBpin (180  $\mu$ L, 1.2 mmol). After 20 h, the resulting solution was

added 20 mL of ether and filtered through a pad of silica gel, washed by ether (10 mL  $\times$  2). The combined filtrates were concentrated and purified by flash column chromatography using PE/ $EtOAc$  = 20/1 as the eluent to afford **2ac** (0.2443 g, 0.74 mmol, 74% yield) as a colorless oil. IR (neat): 2980, 2924, 2852, 1453, 1368, 1324, 1147  $cm^{-1}$ ; Optical Rotation:  $[\alpha]_D^{20} = +15.1$  (c 1.1,  $CHCl_3$ ), 99% ee determined by HPLC after oxidized to the corresponding alcohol, HPLC conditions: Chiralcel AS-H,  $n$ -hexane/ $i$ -PrOH = 99.1/0.9, 1.0 mL/min,  $n = 220$  nm, tr 10.5 (minor), 11.1 (major).  $^1H$  NMR (400 MHz,  $CDCl_3$ ):  $\delta$  7.27-7.18 (m, 4H), 7.14-7.08 (m, 1H), 2.25 (t,  $J = 7.6$  Hz, 1H), 1.89-1.79 (m, 1H), 1.73-1.58 (m, 6H), 1.26 -1.07 (m, 18H), 0.90-0.78 (m, 2H);  $^{13}C$  NMR (101 MHz,  $CDCl_3$ ):  $\delta$  143.5, 128.3, 128.2, 125.0, 83.2, 37.7, 37.1, 33.4, 33.3, 29.9, 26.7, 26.4, 24.6, 24.5. HRMS (EI) calculated for  $[C_{21}H_{33}BO_2]^+$  requires  $m/z$  328.2574, found  $m/z$  328.2574.

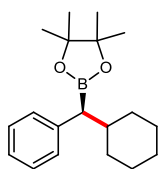

**(S)-2-(cyclohexyl(phenyl)methyl)-4,4,5,5-tetramethyl-1,3,2-dioxaborolane**

**(2ad):** Prepared according to the general procedure using  $Co(OAc)_2$  (0.0179 g, 0.010mmol), **L8** (0.0495 g, 0.12mmol),  $Et_2O$  (1 mL), **1ad** (0.1744 g, 1.0 mmol) and HBpin (180  $\mu$ L, 1.2 mmol). After 48 h, the resulting solution was

added 20 ml of ether and filtered through a pad of silica gel, washed by ether (10 mL  $\times$  2). The combined filtrates were concentrated and purified by flash column chromatography using PE/ $EtOAc$  = 100/1 as the eluent to afford **2ad** (0.1670 g, 0.55 mmol, 55% yield) a colorless oil. IR (neat): 2922, 2851, 1449, 1356, 1318, 1143  $cm^{-1}$ ; Optical Rotation:  $[\alpha]_D^{20} = +13.0$  (c 0.99,  $CHCl_3$ ), >99 % ee determined by HPLC, HPLC conditions: Chiralcel AS-H,  $n$ -hexane/ $i$ -PrOH = 98/2, 1.0 mL/min,  $n = 220$  nm, tr 8.3 (minor), 10.0 (major).  $^1H$  NMR (400 MHz,  $CDCl_3$ ):  $\delta$  7.25-7.16 (m, 4H), 7.15-7.08 (m, 1H), 2.04 (d,  $J = 10.4$  Hz, 1H), 1.87-1.66 (m, 3H), 1.48-1.23 (m, 4H), 1.19 (s, 6H), 1.17 (s, 6H), 1.15-0.95 (m, 3H), 0.86-0.68 (m, 1H);  $^{13}C$  NMR (101 MHz,  $CDCl_3$ ):  $\delta$  141.7, 129.1, 128.0, 125.1, 83.1, 40.2, 33.8, 32.4, 26.6, 26.5, 26.3, 24.6, 24.5; HRMS

(EI) calculated for  $[C_{19}H_{29}BO_2]^+$  requires  $m/z$  300.2261, found  $m/z$  300.2258.

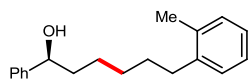

**(S)-1-phenyl-6-(o-tolyl)hexan-1-ol (3ae):** Prepared according to the general procedure using  $Co(OAc)_2$  (0.0045 g, 0.025 mmol), **L8** (0.0126 g, 0.031 mmol),  $Et_2O$  (1 mL), **1ae** (0.1259 g, 0.5 mmol) and HBpin (90  $\mu$ L, 0.6 mmol). After 20 h, the resulting solution was added 20 mL of ether and filtered through a pad of silica gel, washed by ether (10 mL  $\times$  2). The combined filtrates were concentrated and dissolved in ether (10 mL). The solution was cooled to 0  $^{\circ}C$  with an ice-water bath and NaOH (2 mL of a 2 M aqueous solution) was added followed by  $H_2O_2$  (2 mL of a 30% aqueous solution). After stirring at room temperature for 2 hour, the reaction mixture was diluted with ether and water. The organic layer was separated and the aqueous layer extracted with EtOAc (3  $\times$  20 mL). The combined organic phases were dried over anhydrous  $Na_2SO_4$  and concentrated in vacuo and purified by flash column chromatography using PE/EtOAc = 10/1 as the eluent to afford **3ae** (0.0903 g, 0.34mmol, 67% yield, 11/1 ratio) as a colorless oil. IR (neat): 3349, 2930, 2857, 1492, 1454, 1027  $cm^{-1}$ ; Optical Rotation:  $[\alpha]_D^{20} = -21.3$  (c 1.40,  $CHCl_3$ ), 98% ee determined by HPLC, HPLC conditions: Chiralcel OJ-H, *n*-hexane/*i*-PrOH = 98/2, 1.0 mL/min,  $n = 220$  nm, tr 41.3 (minor), 44.6 (major).  $^1H$  NMR (400 MHz,  $CDCl_3$ )  $\delta$  7.38-7.03 (m, 9H), 4.89 (t,  $J = 6.4$  Hz, 0.08H), 4.63 (t,  $J = 6.4$  Hz, 0.95H), 2.63-2.52 (m, 2H), 2.30 (s, 0.24H), 2.27 (s, 2.55H), 1.92 (s, 1H), 1.86-1.23 (m, 8H). HRMS (ESI) calculated for  $[M+Na]^+[C_{19}H_{24}ONa]^+$  requires  $m/z$  291.1725, found  $m/z$  291.1735.

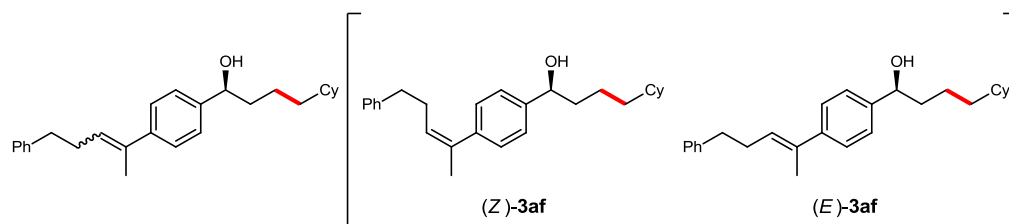

Prepared according to the general procedure using  $Co(OAc)_2$  (0.0023 g, 0.013 mmol), **L8** (0.0063 g, 0.015 mmol),  $Et_2O$  (0.5 mL), **1af** (0.0901 g, 0.25 mmol) and HBpin (40  $\mu$ L, 0.26 mmol). After 20 h, the resulting solution was added 20 mL of ether and filtered through a pad of silica gel, washed by ether (10 mL  $\times$  3). The combined filtrates were concentrated and dissolved in ether (10 mL). The solution was cooled to 0  $^{\circ}C$  with an ice-water bath and NaOH (1.0 mL of a 2 M aqueous solution) was added followed by  $H_2O_2$  (1.0 mL of a 30% aqueous solution). After stirring at room

temperature for 2 hour, the reaction mixture was diluted with ether and water. The organic layer was separated and the aqueous layer extracted with EtOAc (3× 20 mL). The combined organic phases were dried over anhydrous Na<sub>2</sub>SO<sub>4</sub> and concentrated in vacuo and purified by flash column chromatography using PE/EtOAc = 20/1 and PE/EtOAc = 10/1 as the eluent to afford a mixture of (*Z*)-**3af** and (*E*)-**3af** (0.0504 g, 0.13 mmol, 54% yield, (*Z*)-**3af**/(*E*)-**3af** = 1.26/1) as a colorless oil. 94 % ee for (*Z*)-**3af** and 94% ee for (*E*)-**3af** determined by HPLC, HPLC conditions: Chiralcel AS-H, *n*-hexane/*i*-PrOH = 98/2, 1.0 mL/min, *n* = 220 nm, tr<sub>(*Z*)-3af</sub> 7.3 (minor), 8.7 (major) and tr<sub>(*E*)-3af</sub> 10.9 (minor), 14.5 (major). <sup>1</sup>H NMR (400 MHz, CDCl<sub>3</sub>) δ 7.36-7.05 (m, 9H), 5.86-5.78 (m, 0.42H), 5.53-5.45 (m, 0.53H), 4.64 (t, *J* = 6.8 Hz, 1H), 2.76 (t, *J* = 7.6 Hz, 0.91H), 2.64 (t, *J* = 7.6 Hz, 1.17H), 2.57-2.48 (m, 0.93H), 2.34-2.24 (m, 1.14H), 2.01 (s, 1.68H), 1.96 (s, 1.30H), 1.84-1.61 (m, 7H), 1.49-1.10 (m, 9H), 0.92-0.78 (m, 2H).

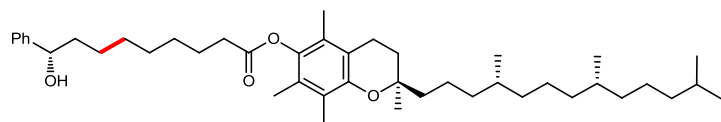

**(S)-(R)-2,5,7,8-tetramethyl-2-((4R,8R)-4,8,12-trimethyltridecyl)chroman-6-yl-9-hydroxy-9-phenylnonanoate (3ag):** Prepared according to the general procedure using Co(OAc)<sub>2</sub> (0.0045 g, 0.025 mmol), **L8** (0.0126 g, 0.031 mmol), Et<sub>2</sub>O (1 mL), **1ag** (0.3220 g, 0.5 mmol) and HBpin (90 μL, 0.6 mmol). After 20 h, the resulting solution was added 20 mL of ether and filtered through a pad of silica gel, washed by ether (10 mL x 3). The combined filtrates were concentrated and dissolved in ether (10 mL). The solution was cooled to 0 °C with an ice-water bath and NaOH (2 mL of a 2 M aqueous solution) was added followed by H<sub>2</sub>O<sub>2</sub> (2 mL of a 30% aqueous solution). After stirring at room temperature for 2 hour, the reaction mixture was diluted with ether and water. The organic layer was separated and the aqueous layer extracted with EtOAc (3× 20 mL). The combined organic phases were dried over anhydrous Na<sub>2</sub>SO<sub>4</sub> and concentrated in vacuo and purified by flash column chromatography using PE/EtOAc = 5/1 as the eluent to afford **3ag** (0.1989 g, 0.30 mmol, 60% yield) as a colorless oil. IR (neat): 3559, 2930, 2857, 1753, 1459, 1148, 1102 cm<sup>-1</sup>; Optical Rotation: [α]<sub>D</sub><sup>20</sup> = -7.0 (c 0.91, CHCl<sub>3</sub>), 98% de determined by HPLC, HPLC conditions: Chiralcel AD-H, *n*-hexane/*i*-PrOH = 95/5, 1.0 mL/min, *n* = 220 nm, tr 8.2 (major), 9.3 (minor). <sup>1</sup>H NMR (400 MHz, CDCl<sub>3</sub>): δ 7.37-7.30 (m, 4H), 7.30-7.22 (m, 1H), 4.64 (t, *J* = 6.4 Hz, 1H), 2.62-2.51 (m, 4H), 2.12-1.90 (m, 10H), 1.86-1.63 (m, 6H), 1.59-0.98 (m, 32H), 0.90-0.82 (m,

12H);  $^{13}\text{C}$  NMR (101 MHz,  $\text{CDCl}_3$ ):  $\delta$  172.3, 149.3, 144.9, 140.5, 128.4, 127.4, 126.6, 125.8, 124.8, 122.9, 117.3, 75.0, 74.6, 39.3, 39.0, 37.4, 37.2, 34.1, 32.8, 32.7, 31.1, 29.3, 29.2, 29.1, 27.9, 25.7, 25.1, 24.8, 24.4, 22.7, 22.6, 21.0, 20.6, 19.7, 19.6, 12.9, 12.1, 11.8. HRMS (ESI) calculated for  $[\text{M}+\text{Na}]^+[\text{C}_{44}\text{H}_{70}\text{O}_4\text{Na}]^+$  requires  $m/z$  685.5172, found  $m/z$  685.5176.

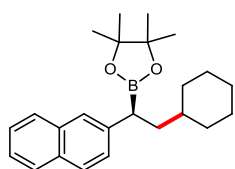

**(S)-2-(2-cyclohexyl-1-(naphthalen-2-yl)ethyl)-4,4,5,5-tetramethyl-1,3,2-dioxaborolane (2ah):** Prepared according to the general procedure using  $\text{Co}(\text{OAc})_2$  (0.0045 g, 0.025 mmol), **L8** (0.0125 g, 0.030 mmol),  $\text{Et}_2\text{O}$  (1 mL), **1ah** (0.2369 g, 1.0 mmol) and HBpin (180  $\mu\text{L}$ , 1.2 mmol). After 20 h, the resulting solution was added 20 mL of ether and filtered through a pad of silica gel, washed by ether (10 mL  $\times$  2). The combined filtrates were concentrated and purified by flash column chromatography using PE/EtOAc = 20/1 as the eluent to afford **2ah** (0.1990 g, 0.55 mmol, 55% yield) as a white solid. IR (neat): 2922, 2850, 1448, 1323, 1141  $\text{cm}^{-1}$ ; Optical Rotation:  $[\alpha]_{\text{D}}^{20} = +20.9$  (c 1.15,  $\text{CHCl}_3$ ), 99% ee determined by HPLC after oxidized to the corresponding alcohol, HPLC conditions: Chiralcel AS-H, *n*-hexane/*i*-PrOH = 98/2, 1.0 mL/min,  $n = 220$  nm, tr 13.8 (minor), 18.2 (major).  $^1\text{H}$  NMR (400 MHz,  $\text{CDCl}_3$ ):  $\delta$  7.82-7.70 (m, 3H), 7.63 (s, 1H), 7.46-7.35 (m, 3H), 2.63 (t,  $J = 8.0$  Hz, 1H), 1.90-1.56 (m, 7H), 1.28-1.16 (m, 16H), 1.00-0.82 (m, 2H);  $^{13}\text{C}$  NMR (101 MHz,  $\text{CDCl}_3$ ):  $\delta$  141.2, 133.8, 131.7, 127.6, 127.49, 127.46, 127.4, 126.1, 125.5, 124.7, 83.3, 39.7, 36.5, 33.7, 32.9, 29.5, 26.6, 26.31, 26.25, 24.6, 24.5. HRMS (ESI) calculated for  $[\text{M}+\text{Na}]^+[\text{C}_{24}\text{H}_{33}\text{BO}_2\text{Na}]^+$  requires  $m/z$  387.2471, found  $m/z$  387.2478.

### Gram scale reaction:

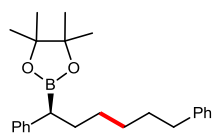

**(S)-2-(1,6-diphenylhexyl)-4,4,5,5-tetramethyl-1,3,2-dioxaborolane (2a):** Prepared according to the general procedure using  $\text{Co}(\text{OAc})_2$  (0.0088 g, 0.050 mmol), **L8** (0.0249 g, 0.060 mmol),  $\text{Et}_2\text{O}$  (5.0 mL), **1a** (1.1822 g, 5.0 mmol) and HBpin (0.90  $\mu\text{L}$ , 6.0 mmol). After 20 h, the resulting solution was added 20 mL of ether and filtered through a pad of silica gel, washed by ether (10 mL  $\times$  4). The combined filtrates were concentrated and purified by flash column chromatography using PE/EtOAc = 20/1 as the eluent to afford **2a** (1.7324 g, 4.76 mmol, 95% yield) as a colorless oil. Optical Rotation:  $[\alpha]_{\text{D}}^{20} = +15.8$  (c 1.04,  $\text{CHCl}_3$ ); 99% ee determined by HPLC after oxidized to the corresponding alcohol,

HPLC conditions: Chiralcel OJ-H, *n*-hexane/*i*-PrOH = 99/1, 0.5 mL/min, *n* = 220 nm, tr 10.7 (minor), 12.3 (major).

### Applications of chiral boronic ester

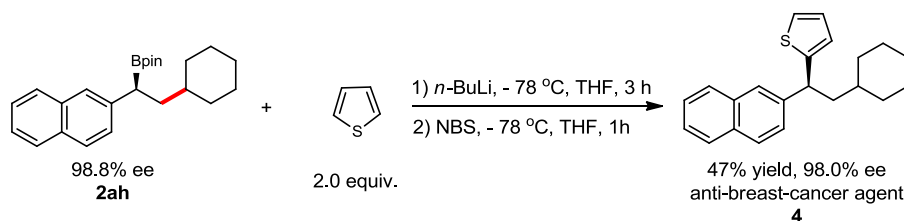

**(S)-2-(2-cyclohexyl-1-(naphthalen-2-yl)ethyl)thiophene (4):** Prepared according to the previous reported literature,<sup>25</sup> a solution of thiophene (32  $\mu$ L, 0.40 mmol, 1.3 eq.) in THF (2.0 mL) was cooled to -78 °C and treated with *n*-BuLi (160  $\mu$ L, 0.40 mmol, 2.5 M in hexanes, 1.3 eq.). The mixture was stirred at -78 °C for 10 min and at room temperature for 3 h. The mixture was cooled to -78 °C and a solution of **2ah** (0.1098 g, 0.30 mmol, 1.0 eq.) in THF (1.5 mL) was added dropwise. The mixture was stirred at -78 °C for 1 h and a solution of NBS (0.0720 g, 0.4 mmol, 1.3 eq.) in THF (1.0 mL) was added dropwise. After 1 h at -78 °C, Na<sub>2</sub>S<sub>2</sub>O<sub>3</sub> sat. was added and the reaction mixture was allowed to warm to room temperature. The organic layer was separated and the aqueous layer was extracted with EtOAc (2x30 mL). The combined organic phases were dried over anhydrous Na<sub>2</sub>SO<sub>4</sub> and concentrated in vacuo. The resulting crude product was purified by column chromatography (silica gel, 200-300 mesh) using PE/EtOAc = 50/1 as the eluent to afford **4** (0.0454 g, 47% yield) as a colorless oil. IR (neat): 2921, 2850, 1447, 1262 cm<sup>-1</sup>; Optical Rotation:  $[\alpha]_D^{20} = +51.6$  (c 1.0, CHCl<sub>3</sub>), 98% ee determined by HPLC, HPLC conditions: Chiralcel OJ-H, *n*-hexane/*i*-PrOH = 99/1, 0.5 mL/min, *n* = 220 nm, tr 22.2 (major), 29.7 (minor). <sup>1</sup>H NMR (400 MHz, CDCl<sub>3</sub>):  $\delta$  7.82-7.74 (m, 3H), 7.70 (s, 1H), 7.50-7.34 (m, 3H), 7.12 (d, *J* = 4.8 Hz, 1H), 6.91 (dd, *J* = 4.8, 4.0 Hz, 1H), 6.84 (d, *J* = 7.2 Hz, 1H), 4.45 (dd, *J* = 8.4, 7.6 Hz, 1H), 2.05 (dd, *J* = 7.6, 7.2 Hz, 2H), 1.85 (d, *J* = 12.4 Hz, 1H), 1.75-1.54 (m, 4H), 1.29-0.89 (m, 6H); <sup>13</sup>C NMR (101 MHz, CDCl<sub>3</sub>):  $\delta$  150.0, 142.3, 133.5, 132.3, 128.2, 127.7, 127.6, 126.5, 126.1, 126.0, 125.9, 125.4, 123.7, IR (neat): 2981, 2933, 1457, 1369, 1324, 1144, 1070 cm<sup>-1</sup>; 123.4, 44.9, 43.6, 34.9, 33.6, 32.9, 26.6, 26.1, 26.0. All the spectroscopic data were in agreement with the reported ones.<sup>26</sup>

### Utilization of a mixture of geometrical and positional alkene isomers



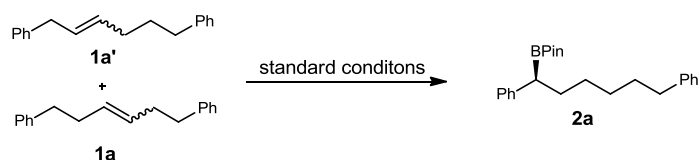

Prepared according to the general procedure using  $\text{Co}(\text{OAc})_2$  (0.0045 g, 0.025 mmol), **L8** (0.0127 g, 0.031 mmol),  $\text{Et}_2\text{O}$  (1 mL), **1a/1a'** (0.2360 g, 1.0 mmol, 1/1 mixture) and HBpin (180  $\mu\text{L}$ , 1.2 mmol). After 20 h, the resulting solution was added 20 mL of ether and filtered through a pad of silica gel, washed by ether (10 mL  $\times$  2). The combined filtrates were concentrated and purified by flash column chromatography using PE/EtOAc = 20/1 as the eluent to afford **2a** (0.3456 g, 0.95 mmol, 95% yield) as a colorless oil. Optical Rotation:  $[\alpha]_{\text{D}}^{20} = +15.4$  (c 1.35,  $\text{CHCl}_3$ ), 99% ee determined by HPLC after oxidized to the corresponding alcohol, HPLC conditions: Chiralcel AD-H, *n*-hexane/*i*-PrOH = 98/2, 1.0 mL/min,  $n = 220$  nm, tr 22.4 (major), 25.1 (minor).  $^1\text{H}$  NMR (400 MHz,  $\text{CDCl}_3$ ):  $\delta$  7.30-7.08 (m, 10H), 2.56 (t,  $J = 7.6$  Hz, 2H), 2.28 (t,  $J = 7.6$  Hz, 1H), 1.90-1.78 (m, 1H), 1.70-1.53 (m, 3H), 1.39-1.24 (m, 4H), 1.20 (s, 6H), 1.18 (s, 6H).

#### Deuterium labeling experiment

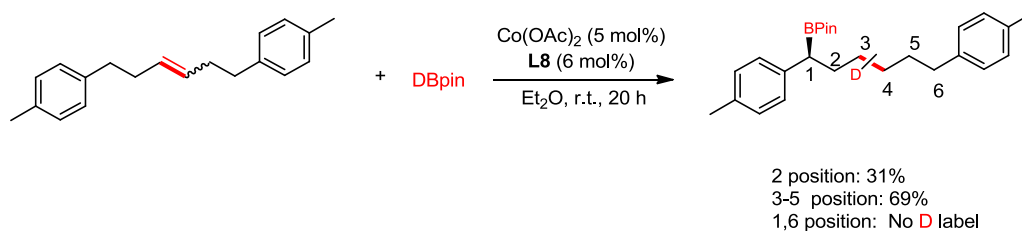

Prepared according to the general procedure using  $\text{Co}(\text{OAc})_2$  (0.0088 g, 0.050 mmol), **L8** (0.0249 g, 0.060 mmol),  $\text{Et}_2\text{O}$  (1 mL), **1ai** (0.2649 g, 1.0 mmol) and DBpin (180  $\mu\text{L}$ , 1.2 mmol). After 20 h, the resulting solution was added 20 mL of ether and filtered through a pad of silica gel, washed by ether (10 mL  $\times$  2). The combined filtrates were concentrated and purified by flash column chromatography using PE/EtOAc = 20/1 as the eluent to afford **2ai** (0.3828 g, 0.97 mmol, 97% yield) as a colorless oil. IR (neat): 2925, 2855, 1366, 1322, 1144  $\text{cm}^{-1}$ ; Optical Rotation:  $[\alpha]_{\text{D}}^{20} = +17.7$  (c 0.90,  $\text{CHCl}_3$ ), 99% ee determined by HPLC after oxidized to the corresponding alcohol, HPLC conditions: Chiralcel AS-H, *n*-hexane/*i*-PrOH = 98/2, 1.0 mL/min,  $n = 220$  nm, tr 9.7 (minor), 11.7 (major).  $^1\text{H}$  NMR (400 MHz,  $\text{C}_6\text{D}_6$ )  $\delta$  7.30 (d,  $J = 7.6$  Hz, 2H), 7.04 (d,  $J = 8.0$  Hz, 2H), 7.01-6.98 (m, 4H), 2.52-2.42 (m, 3H), 2.16 (s, 3H), 2.14 (s, 3H), 2.11-1.98 (m, 0.84 H), 1.89-1.76 (m, 0.85H), 1.60-49 (m, 1.90 H), 1.47-1.24 (m, 3.41H), 1.02 (s, 6H), 1.00 (s, 6H);  $^2\text{H}$

NMR (76.8 MHz, CHCl<sub>3</sub>+CDCl<sub>3</sub>)  $\delta$ , 1.87, 1.63, 1.37.

### The parallel reaction of the alkene (*E*)-**1aj** and (*Z*)-**1aj**

Prepared according to the general procedure using Co(OAc)<sub>2</sub> (0.0044 g, 0.025 mmol), **L8** (0.0124 g, 0.03 mmol), Et<sub>2</sub>O (1.0 mL), (*Z*)-**1aj** (0.1040 g, 0.5 mmol) and HBpin (90  $\mu$ L, 0.6 mmol). After the reaction was complete, the resulting solution was added 20 ml of ether and filtered through a pad of silica gel, washed by ether (10 ml x 2). The combined filtrates were concentrated and analysed by <sup>1</sup>H NMR using TMSPh (10  $\mu$ L) as the internal standard.

### Supplementary Table 4. The parallel reaction of the alkene (*E*)-**1aj** and (*Z*)-**1aj**

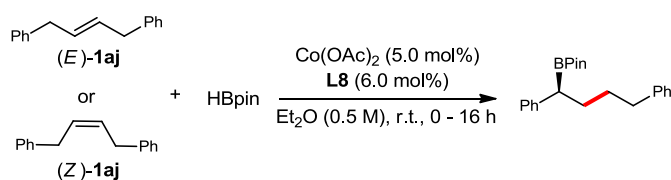

| Entry | Time/h | Yield (from ( <i>E</i> )- <b>1aj</b> ) | Yield (from ( <i>Z</i> )- <b>1aj</b> ) |
|-------|--------|----------------------------------------|----------------------------------------|
| 1     | 0      | 0%                                     | 0%                                     |
| 2     | 3      | 34%                                    | 33%                                    |
| 3     | 5      | 54%                                    | 52%                                    |
| 4     | 7      | 72%                                    | 71%                                    |
| 5     | 11     | 88%                                    | 85%                                    |
| 6     | 16     | 96%                                    | 97%                                    |

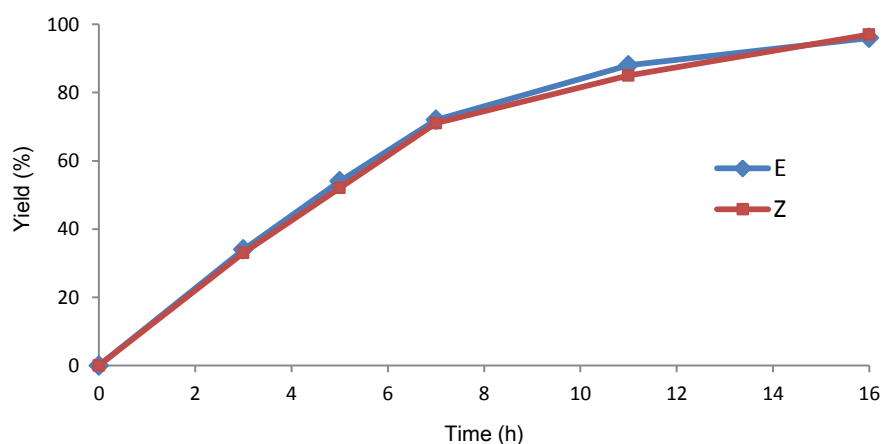

Supplementary Figure 246 The effect of stereochemistry of alkenes on the kinetics of the reaction

### Time course reaction:

Prepared according to the general procedure using  $\text{Co}(\text{OAc})_2$  (0.0022 g, 0.0125 mmol), **L8** (0.0062 g, 0.015 mmol),  $\text{Et}_2\text{O}$  (0.5 mL), **1b** (0.1072 g, 0.5 mmol) and HBpin (90  $\mu\text{L}$ , 0.6 mmol). After the reaction was complete, the resulting solution was added 20 ml of ether and filtered through a pad of silica gel, washed by ether (10 ml x 2). The combined filtrates were concentrated and analysed by  $^1\text{H}$  NMR using TMSPh (10  $\mu\text{L}$ ) as the internal standard.

**Supplementary Table 5.** Time course of alkene isomerization-hydroboration

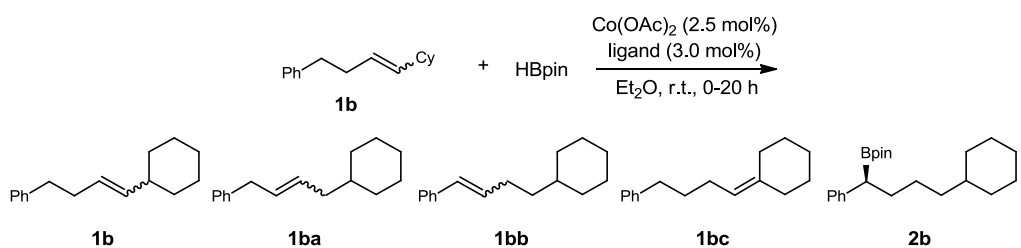

| Entry | time/h | <b>1b</b> <sup>a</sup> | <b>1ba</b> <sup>a</sup> | <b>1bb</b> <sup>a</sup> | <b>1bc</b> <sup>a</sup> | <b>2b</b> <sup>a</sup> |
|-------|--------|------------------------|-------------------------|-------------------------|-------------------------|------------------------|
| 1     | 0      | 100.0%                 | 0.0%                    | 0.0%                    | 0.0%                    | 0.0%                   |
| 2     | 2      | 53.5%                  | 21.0%                   | 0.2%                    | 16.5%                   | 9.0%                   |
| 3     | 4      | 33.3%                  | 17.5%                   | 0.1%                    | 23%                     | 19.5%                  |
| 4     | 6      | 22.0%                  | 13.7%                   | 1.6%                    | 23%                     | 36.0%                  |
| 5     | 8      | 14.5%                  | 9.3%                    | 0.3%                    | 25.5%                   | 43.0%                  |
| 6     | 10     | 3.5%                   | 2.3%                    | 0.0%                    | 24.5%                   | 64.5%                  |
| 7     | 13     | 2.0%                   | 0.7%                    | 0.0%                    | 14.5%                   | 77.0%                  |
| 8     | 16     | 0.0%                   | 0.0%                    | 0.0%                    | 2.1%                    | 89.5%                  |
| 9     | 20     | 0.0%                   | 0.0%                    | 0.0%                    | 0.85%                   | 91.0%                  |

<sup>a</sup>Yields were determined by  $^1\text{H}$  NMR using TMSPh as the internal standard, and is an average of two runs (0.5 mmol scale).

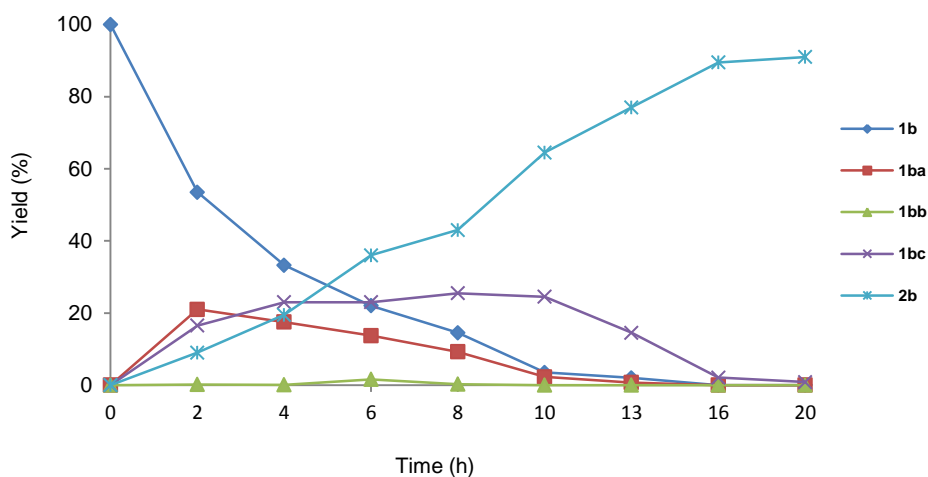

Supplementary Figure 247 The time course study of **1b**.

**Isomerization through alkene bearing branched chains with a pre-existing stereocenter.**

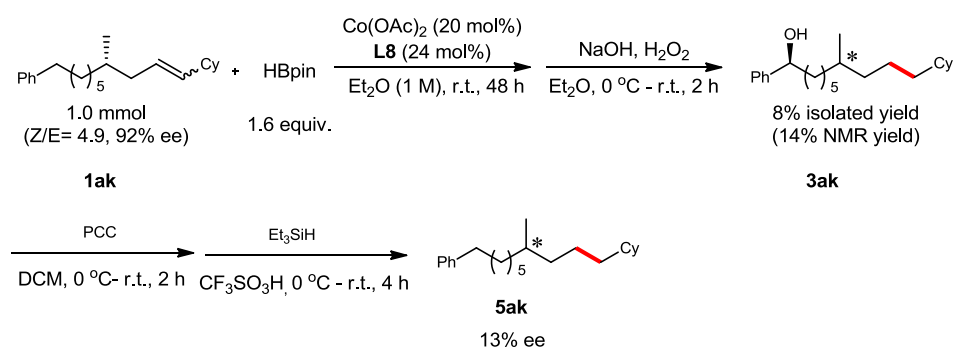

**(1*S*,7*S*)-10-cyclohexyl-7-methyl-1-phenyldecan-1-ol (3ak):**

Prepared according to the general procedure using  $\text{Co}(\text{OAc})_2$  (0.0356 g, 0.20 mmol), **L8** (0.0990 g, 0.24 mmol),  $\text{Et}_2\text{O}$  (1 mL), **1ak** (0.3139 g, 1.0 mmol) and HBpin (240  $\mu\text{L}$ , 1.6 mmol). After 48 h, the resulting solution was added 20 mL of ether and filtered through a pad of silica gel, washed by ether (10 mL  $\times$  2). The combined filtrates were concentrated and dissolved in ether (10 mL). The solution was cooled to 0  $^\circ\text{C}$  with an ice-water bath and NaOH (2 mL of a 2 M aqueous solution) was added followed by  $\text{H}_2\text{O}_2$  (2 mL of a 30% aqueous solution). After stirring at room temperature for 2 hour, the reaction mixture was diluted with ether and water. The organic layer was separated and the aqueous layer extracted with EtOAc (3  $\times$  20 mL). The combined organic phases were dried over anhydrous  $\text{Na}_2\text{SO}_4$  and concentrated in vacuo and purified by flash column chromatography using PE/EtOAc = 40/1 as the eluent to afford **3ak** (0.0285 g, 0.86 mmol, 9% yield) as a colorless oil. IR (neat): 3355, 2923, 2852, 1454,

cm<sup>-1</sup>; 98% de determined by HPLC, HPLC conditions: Chiralcel OD-H, n-hexane/*i*-PrOH = 98/2, 1.0 mL/min,  $n = 220$  nm, tr 8.3 (minor), 9.9 (major). <sup>1</sup>H NMR (400 MHz, CDCl<sub>3</sub>):  $\delta$  7.40-7.32 (m, 4H), 7.31-7.26 (m, 1H), 4.75-4.60 (m, 1H), 1.82-1.64 (m, 7H), 1.41-1.02 (m, 20H), 0.90-0.79 (m, 5H); <sup>13</sup>C NMR (101 MHz, CDCl<sub>3</sub>):  $\delta$  144.9, 128.4, 127.5, 125.9, 74.7, 39.1, 37.9, 37.7, 37.3, 37.0, 33.5, 33.4, 32.7, 29.9, 26.9, 26.8, 26.5, 25.9, 24.2, 19.7. HRMS (EI) calculated for [C<sub>23</sub>H<sub>38</sub>O]<sup>+</sup> requires  $m/z$  330.2923, found  $m/z$  330.2921.

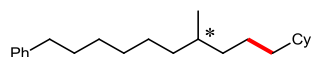

**(S)-(10-cyclohexyl-7-methyldecyl)benzene (5ak):** Alkane **5ak** was prepared from **3ak** according to the literature<sup>27, 28</sup> to determine the

ee value of alkyl chain on **3ak**. 13% ee determined by HPLC, HPLC conditions: Chiralcel OJ-H\*3, n-hexane/*i*-PrOH = 100/0, 0.25 mL/min,  $n = 220$  nm, tr 55.0 (major), 56.3 (minor). <sup>1</sup>H NMR (400 MHz, CDCl<sub>3</sub>):  $\delta$  7.30-7.24 (m, 2H), 7.21-7.13 (m, 3H), 2.60 (t,  $J = 7.6$  Hz, 2H), 1.74-1.57 (m, 7H), 1.36-1.01 (m, 19H), 0.93-0.76 (m, 5H); <sup>13</sup>C NMR (101 MHz, CDCl<sub>3</sub>):  $\delta$  143.0, 128.4, 128.2, 125.5, 37.9, 37.7, 37.4, 37.1, 36.0, 33.5, 33.4, 32.7, 31.5, 29.9, 29.4, 27.0, 26.8, 26.5, 24.2, 19.7. HRMS (EI) calculated for [C<sub>23</sub>H<sub>38</sub>]<sup>+</sup> requires  $m/z$  314.2974, found  $m/z$  314.2971 .

### Linear effect reaction

**L7** with different ee value was prepared by mixing **L7** and **L7<sub>rac</sub>** in THF solution.

Prepared according to the general procedure using Co(OAc)<sub>2</sub> (0.025 mmol), **L7** (0.030 mmol), Et<sub>2</sub>O (1 mL), **1a** (0.5 mmol) and HBpin (90  $\mu$ L, 0.6 mmol). After 20 h, the resulting solution was added 20 mL of ether and filtered through a pad of silica gel, washed by ether (10 mL  $\times$  2). The combined filtrates were concentrated and purified by flash column chromatography using PE/EtOAc = 20/1 as the eluent to afford **2a** as a colorless oil and ee value was determined by HPLC.

**Supplementary Table 6.** Linear effect reaction

| Entry | ee value of ligand <sup>a</sup> | ee value of product <sup>a</sup> |
|-------|---------------------------------|----------------------------------|
| 1     | 0.0%                            | 0.0%                             |
| 2     | 21.3%                           | 20.8%                            |
| 3     | 41.3%                           | 35.1%                            |
| 4     | 60.4%                           | 53.3%                            |

|   |       |       |
|---|-------|-------|
| 5 | 80.5% | 73.6% |
| 6 | 99.6% | 98.0% |

<sup>a</sup>ee value was determined by HPLC, and is an average of two runs (0.5 mmol scale).

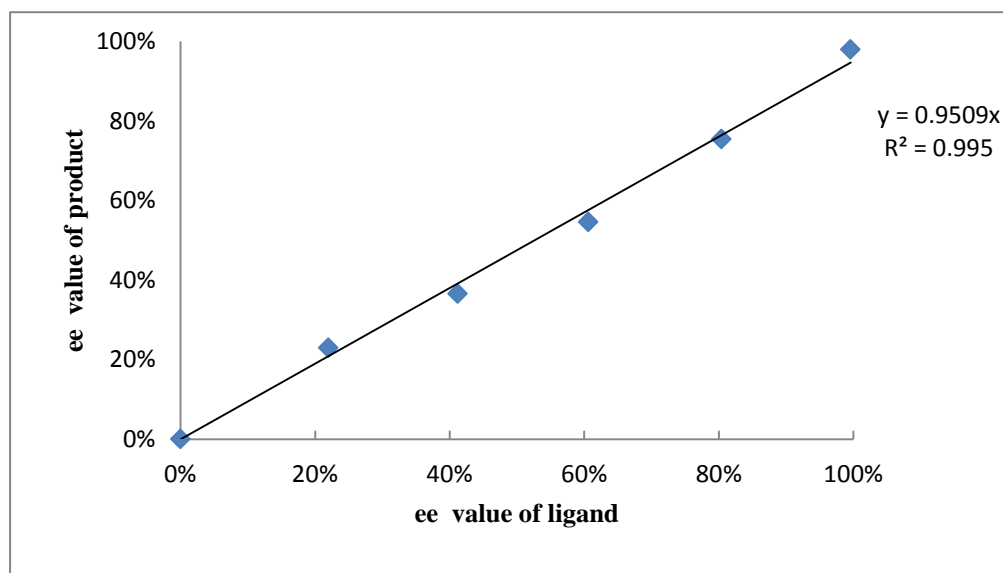

**Supplementary Figure 248** The Linear effect reaction

## Supplementary References

- Chen, J. H., Xi, T., Ren, X., Cheng, B., Guo, J., Lu, Z. Asymmetric cobalt catalysts for hydroboration of 1,1-disubstituted alkenes. *Org. Chem. Front.* **1**, 1306-1309 (2014).
- Zhang, H. Y., Lu, Z. Dual-stereocontrol asymmetric cobalt-catalyzed hydroboration of sterically hindered Styrenes. *ACS Catal.* **6**, 6596-6600 (2016).
- Chen, X., Lu, Z. Iminophenyl oxazolinyphenylamine for enantioselective cobalt-catalyzed hydrosilylation of aryl ketones. *Org. Lett.* **18**, 4658-4661 (2016).
- Wolinska, E. Chiral oxazoline ligands containing a 1,2,4-triazine ring and their application in the Cu-catalyzed asymmetric Henry reaction. *Tetrahedron* **69**, 7269-7278 (2013).
- Decken, A., Gossage, R. A., Yadav, P. N. Oxazoline chemistry. Part VIII. Synthesis and characterization of a new class of pincer ligands derived from the 2-(*o*-aniliny)-2-oxazoline skeleton - Applications to the synthesis of group X transition metal catalysts. *Can. J. Chem.* **83**, 1185-1189 (2005).
- Hao, X. Q., Shen, M. Z., Jian, N. G., Pang, W., Shen, X. J., Zhu, X. J., Song, M. P. Synthesis of chiral *S,N*-thioimidazoline ligands for palladium-catalyzed asymmetric allylic allcylations.

*Tetrahedron: Asymmetry* **27**, 163-170 (2016).

7. Klapars, A., Antilla, J. C., Huang, X. H., Buchwald, S. L. A general and efficient copper catalyst for the amidation of aryl halides and the *N*-arylation of nitrogen heterocycles. *J. Am. Chem. Soc.* **123**, 7727-7729 (2001).
8. Nakagiri, T., Murai, M., Takai, K. Stereospecific deoxygenation of aliphatic epoxides to alkenes under Rhenium catalysis. *Org. Lett.* **17**, 3346-3349 (2015).
9. Sawada, Y., Matsumoto, K., Katsuki, T. Titanium-catalyzed asymmetric epoxidation of non-activated olefins with hydrogen peroxide. *Angew. Chem., Int. Ed.* **46**, 4559-4561 (2007).
10. Ohmiya, H., Makida, Y., Tanaka, T., Sawamura, M. Palladium-catalyzed  $\gamma$ -selective and stereospecific allyl-aryl coupling between allylic acetates and arylboronic acids. *J. Am. Chem. Soc.* **130**, 17276-17277 (2008).
11. Ogura, T., Usuki, T. Total synthesis of acrogenins E, G and K, and centrolobol. *Tetrahedron* **69**, 2807-2815 (2013).
12. Otto, W., Sierdzinski, J., Krol, M., Wolinska, E., Feliksbrodt-Bratosiewicz, M., Wilkowsjska, U. The value of tumor angiogenesis activity for stratification of HCC patients. *Int. J. Clin. Exp. Med.* **10**, 4200-4213 (2017).
13. Lu, X., Xiao, B., Zhang, Z. Q., Gong, T. J., Su, W., Yi, J., Fu, Y., Liu, L. Practical carbon-carbon bond formation from olefins through nickel-catalyzed reductive olefin hydrocarbonation. *Nat. Commun.* **7**, 11129 (2016).
14. Liu, R., Lu, Z. H., Hu, X. H., Li, J. L., Yang, X. J. Monocarboxylation and intramolecular coupling of butenylated arenes via Palladium-catalyzed C-H activation process. *Org. Lett.* **17**, 1489-1492 (2015).
15. Jefferson, A., Sargent, M. V., Wangchareontrakul, S. Synthesis and identification of  $\omega$ -phenylalkylcatechols in Burmese Lac. *Aust. J. Chem.* **41**, 19-25 (1988).
16. De Esch, I. J. P., Gaffar, A., Menge, W. M. P. B., Timmerman, H. Synthesis and histamine H<sub>3</sub> receptor activity of 4-(*n*-alkyl)-1*H*-imidazoles and 4-( $\omega$ -phenylalkyl)-1*H*-imidazoles. *Bioorg. Med. Chem.* **7**, 3003-3009 (1999).
17. Dai, W. P., Zhang, X. X., Zhang, J., Lin, Y. Y., Cao, S. Synthesis of exocyclic trisubstituted alkenes via nickel-catalyzed Kumada-type cross-coupling reaction of gem-difluoroalkenes with di-Grignard Reagents. *Adv. Synth. Catal.* **358**, 183-187 (2016).

18. Pitteloud, J. P., Zhang, Z. T., Liang, Y., Cabrera, L., Wnuk, S. F. Fluoride-promoted cross-coupling of chloro (mono-, di-, or triphenyl) germanes with aryl halides in "moist" toluene. multiple transfer of the phenyl group from organogermane substrates and comparison of the coupling efficiencies of chloro(phenyl)germanes with their corresponding stannane and silane counterparts. *J. Org. Chem.* **75**, 8199-8212 (2010).
19. Yumino, S., Hashimoto, T., Tahara, A., Nagashima, H. Me<sub>2</sub>S-induced highly selective reduction of aldehydes in the presence of ketones involving aldehyde-selective rate enhancement: a triruthenium cluster-catalyzed hydrosilylation. *Chem. Lett.* **43**, 1829-1831 (2014).
20. Too, P. C., Tnay, Y. L., Chiba, S. Copper-catalyzed aerobic aliphatic C-H oxygenation with hydroperoxides. *Beilstein J. Org. Chem.* **9**, 1217-1225 (2013).
21. Wagner, T., Lange, J., Grote, D., Sander, W., Schaumann, E., Adiwidjaja, G., Adam, A., Kopf, J. Organylthio(silyl)carbenes. *Eur. J. Org. Chem.*, 5198-5207 (2009).
22. Nishikawa, Y., Kitajima, M., Kogure, N., Takayama, H. A divergent approach for the total syntheses of cernuane-type and quinolizidine-type Lycopodium alkaloids. *Tetrahedron* **65**, 1608-1617 (2009).
23. Lovinger, G. J., Morken, J. P. Ni-catalyzed enantioselective conjunctive coupling with C(sp<sup>3</sup>) electrophiles: a radical-ionic mechanistic dichotomy. *J. Am. Chem. Soc.* **139**, 17293-17296 (2017).
24. Li, D., He, A. Y., Falck, J. R. Enantioselective, organocatalytic reduction of ketones using bifunctional thiourea-amine catalysts. *Org. Lett.* **12**, 1756-1759 (2010).
25. Bonet, A., Odachowski, M., Leonori, D., Essafi, S., Aggarwal, V. K. Enantiospecific sp<sup>2</sup>-sp<sup>3</sup> coupling of secondary and tertiary boronic esters. *Nat. Chem.* **6**, 584-589 (2014).
26. Yonova, I. M., Johnson, A. G., Osborne, C. A., Moore, C. E., Morrissette, N. S., Jarvo, E. R. Stereospecific nickel-catalyzed cross-coupling reactions of alkyl Grignard reagents and identification of selective anti-breast-cancer agents. *Angew. Chem., Int. Ed.* **53**, 2422-2427 (2014).
27. Houjeiry, T. I., Poe, S. L., McQuade, D. T. Synthesis of optically active 4-substituted 2-cyclohexenones. *Org. Lett.* **14**, 4394-4397 (2012).
28. Olah, G. A., Arvanaghi, M., Ohannesian, L. Synthetic methods and reactions .126. trifluoromethanesulfonic acid triethylsilane - a new ionic hydrogenation reagent for the reduction of diaryl and alkyl aryl ketones to hydrocarbons. *Synthesis*. **9**, 770-772 (1986).
